# Supplementary material
Source: Research Square preprint supplement (doi:10.21203/rs.3.rs-9313202/v1)
Supplement: Supplementary file 1 [file 39f1f2ab0778dd87ed28872f.docx]

**Supplementary file 1**

**Codon Usage Data Acquisition and Preparation**

The analysis was initiated using raw sequence data provided in FASTA files, which contained both sequence IDs and corresponding nucleotide sequences. This raw data was processed and extracted using Jupyter Notebook, and subsequently exported into Microsoft Excel for downstream computational analysis. All sequence manipulation and motif analyses were performed using robust conditional and string-handling formulas within the Excel environment.

**Identification and Analysis of Conserved Nucleotide Motifs**

Two distinct conserved motifs were analysed to identify the three bases immediately following the detected pattern in each sequence: a 15-base ribosomal protein motif (eL42) and a 9-base ribosomal protein motif (uL15).

*Analysis of the 15-Base Motif (eL42)*

The 15-base target motif analysed represented the pattern GGN GGN CAA/CAG, followed by six additional bases (GG?GG?CAA?????? or GG?GG?CAG??????) (amino acid codons Gly, Gly, Gln followed by six bases).

i. Motif Identification and Validation: Initial motif location utilised the SEARCH function within Excel to identify the starting position of the two potential variants (CAA version and CAG version) within the nucleotide sequences.

The formulas used were:

=IFERROR(SEARCH("GG?GG?CAA??????";D2);"") and =IFERROR(SEARCH("GG?GG?CAG??????"; D2); "").

Strict validation was then performed to ensure that all eight wildcard positions ("?") represented true nucleotide bases (Adenine (A), Cytosine (C), Guanine (G), or Thymine (T)). Validation involved checking the base at each wildcard position using the formula structure ISNUMBER(FIND(MID(...; "ACGT"))). If any position contained an invalid or ambiguous character, the result was discarded. Only motif start positions that passed this strict validation were recorded.

ii. Selection and Extraction: If both validated motifs (CAA and CAG versions) were present, the one occurring earliest in the sequence was selected using the MIN function [6]. The formula used was =IF(AND(G2=""; H2="");""; IF(G2=""; H2; IF(H2=""; G2; MIN(G2; H2)))), ensuring that the downstream extraction was based on the earliest true occurrence of the 15-base pattern.

Once the first validated motif position (I2) was determined, the three nucleotide bases immediately following the 15-base region were extracted using the MID function: =IF(I2="";""; MID(D2; I2+15; 3)).

iii. Amino Acid Translation: The extracted three-base sequence (triplet/codon) was translated into its corresponding amino acid name using the standard genetic code via the Excel IFS function [8]. Specific attention was paid to identifying Pro (CCA, CCG, CCT, CCC), Gln (CAG, CAA), and Glu (GAA, GAG). All other codons were assigned to a default category of "Other".

*Analysis of the 9-Base uL15 Motif*

The uL15 motif analysis focused on the 9-base conserved structure represented by GC N GG N GG N, or "GC?GG?GG?" (amino acid motif Ala, Gly, Gly) .

i. Motif Identification and Validation: Initial identification of the 9-base pattern was performed using the SEARCH function: =IFERROR(SEARCH("GC?GG?GG?"; B2); "").

Validation was applied to the three wildcard positions (the third, sixth, and ninth bases of the 9-base motif). The formula verified that these wildcard positions were true nucleotides (A, C, G, or T) using the FIND function nested within ISNUMBER for the positions relative to the start index (C2+2, C2+5, and C2+8). If all three wildcard positions contained valid nucleotides, the validated start index was returned; otherwise, the cell was left blank.

ii. Extraction and Amino Acid Translation: Following validation, the three nucleotides immediately succeeding the 9-base motif were extracted. Since the motif length is 9 bases, the extraction started at position C2 + 9, using the formula: =IF(C2="";""; MID(B2; C2+9; 3)).

The resulting downstream codon was translated into the corresponding amino acid using the standard genetic code via the IFS function. This translation checked for specific amino acids, including leucine, glutamine, phenylalanine, methionine, alanine, aspartic acid, asparagine, and glutamic acid, with the remaining codons categorised as "Other".
