# Supplementary material
Source: Research Square preprint supplement (doi:10.21203/rs.3.rs-9313202/v1)
Supplement: Supplementary file 2 [file 4c1ae87255d8639aa7962cc2.docx]

**Supplementary 4**

**Additional details for some species**

***Dipodascales***

Some species in the *Dipodascales* showed no correlation between their genotype related to the ribosomal genes *eL42* and *uL15* and their reported ability to tolerate CHX in culture. This could be explained by alternative mechanisms of CHX resistance,which should be considered for these species. For example, in the description of *Wickerhamiella versatilis,* which was initially described as *Torulopsis vanderwaltii* (Vidal-Leira 1966), there is no mention of CHX tolerance. Nonetheless, Steensels et al. (2015) proposed that all *Brettanomyces* species are tolerant to CHX, and at that time, *W. versatilis* was treated as a species of *Brettanomyces*. The predicted eL42 and uL5 protein sequences for this species do not suggest that mutations in these proteins are responsible for its CHX resistance.

Some species in the *Diploascales* with possible resistance-conferring mutations (e.g., eL42 P56Q or uL15 Q38L/Q38M), have been described as sensitive to CHX. These include Geotrichum phurueaensis (Kaewwichian et al. 2010), W. siamensis (Khunnamwong et al. 2014), and Blastobotrys persicus (Nouri et al. 2018), and the sequenced strains are the same as those in the Westerdijk collection. These inconsistencies emphasise a need to reassess phenotype-genotype relationships for CHX resistance across different species.

***Pichiales***

*Species where the culture-based studies are contradictory*

The original description of *Ogataea henricii* (Wickerham, 1969) (formerly *Hansenula henricii*) does not include data on CHX tolerance, and this species was not tested by Kurtzman et al. (2011). Our analysis, showing the mutation P56Q in the *eL42* gene, suggests that the strain should be resistant and that the Westerdijk data, which reports sensitivity, should be verified.

The original description of *Ogataea pini* (formerly *Zygosaccharomyces pini*), by Holst (1936) does not include CHX data. Nagatsuka et al. (2008) suggest that this species exhibits variable tolerance to CHX, citing Kurtzman (1998) and Barnett et al. (2000) as sources. However, Kurtzman et al. (2011) state that they did not test this species directly. Therefore, CHX sensitivity of *O. pini* remains uncertain and may be strain-dependent. Westerdijk data for this species suggest weak growth at 0.01%, but given the data from the genotype where the *eL42* gene is predicted to encode P56Q, this species is most likely tolerant of CHX.

For *Martiniozyma asiatica* (formerly *Candida asiatica*)*,* Limtong et al. (2010) reported that the species is sensitive to 0.01% CHX, which contradicts the Westerdijk records. In contrast, *Ambrosiozyma monospora* (*eL42* gene predicted to encode P56Q) was reported to be tolerant to 0.01% and 0.1% CHX by Kurtzman et al. (2011), which is inconsistent with Westerdijk records. The description of *Candida phayaonensis* by Limtong et al. (2012) is unclear: the English text states that the species can grow in the presence of CHX, whereas the Latin diagnosis suggests that this is not the case. The predicted amino acid sequence of the *eL42* and *uL15* genessuggests that this species should be sensitive to CHX. The sequenced genome is that of the ex-type strain, emphasising a need to re-evaluate this species in culture-based studies.

***Species where genotype and culture-based studies do not correlate***

It is important to recognise that some species with mutations such as eL42 P56Q or uL15 Q38L/Q38M, typically associated with CHX resistance, have been reported to be sensitive to the antibiotic. For example, Koowadjanakul et al. (2011) report that *Candida mattranensis* (*Pichiales*)does not grow in the presence of CHX. This conclusion is based on the ex-type strain CBS 12097, which is the same strain for which the genome was sequenced. Further studies will be required to understand why this strain (and others in the *Pichiales*) are not CHX-resistant.

***Saccharomycetales***

*Species with variable resistance*

In the case of *Vanderwaltozyma yarrowii* (formerly *Kluyveromyces yarrowii*), van der Walt et al. (1986) did not report CHX sensitivity, but Kurtzman et al. (2011) described the species as having variable tolerance to the antibiotic. This is also reflected in the Westerdijk data. The genomic data for strain CBS 8242 (NRRL Y-17763) suggest CHX resistance (uL15, Q38L). The Westerdijk data for strain CBS 8242 reports sensitivity, but not for all other strain;d this case needs to be clarified. Similarly, *Naumovozyma dairenensis* (previously *Saccharomyces dairenensis*) was reported by Kurtzman et al. (2011) to have variable resistance to CHX in culture. Naganishi (1917) did not include CHX data, but the gene sequence suggests resistance. In this case, the genome sequence is for the same strain that is listed as having variable tolerance to CHX in the Westerdijk database.

*Species where the culture-based studies are contradictory*

Kurtzman et al. (2011) report that *Eremothecium sinecaudum* (formerly *Nemaospora sinecauda*) can grow in cultures containing 0.01% CHX, but they did not test this species at higher concentrations such as 0.1%. The original description of this species (Holley et al. 1984) lacks data on CHX sensitivity, and the Westerdijk records report CHX sensitivity. However, the gene sequence suggests that it should be resistant. Likewise, *Torulaspora globosa* is reported by Kurtzman et al. (2011)to bes tolerant to 0.01% but not 0.1% CHX, and the Westerdijk data show delayed growth in the presence of the antibiotic. *Zygotorulaspora danielsina* was shown to be tolerant to both 0.01% and 0.1% CHX in the original description (Carvalho et al. 2018); thus, the Westerdijk records showing sensitivity need re-evaluation.

*Species where genotype and culture-based studies do not correlate*

Some species of *Saccharomycetales* have genotypes associated with CHX resistance (e.g., eL42 P56Q or uL15 Q38L/Q38M), but they were reported as sensitive in culture-based studies. For example, Jacques et al. (2016) note that *Kazachstania saulgeensis* (currently *Maudiozyma saulgeensis*) CBS 14374 (sequenced strain) is sensitive despite having a Q38L substitution in uL15. *Kazachstania kunashirensis,* initially described as *Saccharomyces kunashirensis* (James et al. 1997), is also reported to be CHX-sensitive (CBS 7662). Kurtzman et al. (2011) state that *Kazachstania africana* cannot grow in 0.01% CHX, yet it also carries the Q38L mutation; this species is recorded as having variable tolerance in the Westerdijk data. *Yueomyces sinensis* (formerly *Saccharomycodes sinensis*) is listed as CHX sensitive by Kurtzman et al. (2011), although this trait is not considered in its original description (Jingzhu, 1977) and the Westerdijk’s data indicates some tolerance. Similarly, *Lachancea mirantina,* described by Pereira et al. (2011), is reported as unable to grow in the presence of CHX, but Westerdijk’s data suggests some tolerance.

***Serinales***

*Species where the culture-based studies are contradictory*

Kurtzman et al. (2011) report that *Australozyma picinguabensis* (previously *Candida picinguabensis*)is resistant to 0.01% CHX, and in the original description, Ruivo et al. (2006) state that this species can grow in the presence of 10 μg CHX ml−1, but growth is negative at 0.1% CHX. However, the Westerdijk data indicate sensitivity to CHX, and the genotypic data suggest that the species should be resistant. Kurtzman et al. (2011) also report that *Candida silvanorum i*s resistant to CHX, showing slow growth at 0.01% CHX, whereas the tests conducted at Westerdijk showed no growth after 7 days. According to the description of this species (Khunnamwong et al. 2022), slow growth is observed at a concentration of 0.01% CHX. The genotypic data suggest that the species should be resistant to CHX.

In the original description of *Candida middelhoveniana* (now *Sungouiella middelhovenian*) (de Ribeiro et al. 2011), the English description states that this species is sensitive to CHX, however, the Latin description indicates that it grows at 0.01% CHX. Therefore, the resistance of this species to CHX needs to be re-evaluated. Additionally, Kurtzman et al. (2011) report that *Suhomyces yuchorum* (originally *Candida yuchorum*) is sensitive to CHX, which was also noted in the Latin original description (Suh and Blackwell, 2005)*.* However, theWesterdijk data show that this species is resistant to 0.01% but not to 0.1% CHX. The genotypic data based on the genes *eL42* and *uL15* of both *Sungouiella middelhoveniana* and *Suhomyces yuchorum* indicate sensitivity to CHX. The CHX tolerance of these species needs to be re-evaluated.

*Species with more than one copy of the* eL42 *gene*

Several species in the Serinales have multiple copies of the eL42 gene. Studies have specifically shown that an additional single copy of the *eL42* (P56Q) gene is insufficient to confer a high level of resistance to CHX if the wild-type *eL42* gene remains present (Bae et al. 2003; Kawai et al. 1992).Species in the *Serinale*s with two copies of the *eL42* gene, one being the CHX-tolerant genotype and the other the CHX-sensitive genotype, are generally treated as sensitive in the Westerdijk data. In the case of *Candida tropicalis,* this species has two copies of each genotype and is listed by Kurtzman et al. (2011) as sensitive to CHX. Other examples of species having two copies of the *eL42* gene were *Metschnikowia henanensis,* *Metschnikowia kofuensis Metschnikowia reukaufii* and *Kodamaea mesenterica*.

It is noteworthy that in some cases, species in the Serinales that possess two or more copies of eL42 (one from the CHX-tolerant and one from the CHX-sensitive genotype) exhibit a CHX-resistant phenotype. These are highlighted in Table 9. In some instances, the eL42-resistant phenotype gene is present in multiple copies, which could account for the CHX phenotype, but this is not true for all these species.

*Species where the gene sequence of* uL15 *does not correlate with CHX resistance*

Some species, which have a leucine or methionine at position 38 in the predicted amino acid sequence of uL15, are not resistant to CHX based on the phenotype. These include *Australozyma nongkhaiensis, Hermanozyma ubatubensis, Australozyma robnettiae* and *Sungouiella sharkensis* (Nakase et al. 2011, Kurtzman et al. 2011, Groenewald et al. 2011).

*Species with alternative CHX resistance mechanisms*

Some species are CHX resistant but do not have the genotype linked to eL42 and uL15 and resistance. Alternative mechanisms of CHX resistance are known to exist and should be considered for these species. There are several such examples in the Serinales, for instance *Candidozyma konsanensis, Candida andamanensis,* and *Sungouiella ecuadorensis.* These are highlighted in Table 9.
