# Supplementary material
Source: Research Square preprint supplement (doi:10.21203/rs.3.rs-9313202/v1)
Supplement: Supplementary file 3 [file 7ce2ad52159242e1d5bc104f.docx]

Table 1 – *Alaninales*

| Species | Strain | Genome | eL42* | Codon 56 | uL15# | Codon 38 | Cycl 0.1% | Cycl 0.01% | Comment |
| --- | --- | --- | --- | --- | --- | --- | --- | --- | --- |
| *Pachysolen tannophilus* | NRRL Y-2460 | yHMPu5000035669 | P | CCT | Q | CAA | N/A | - |  |
| *Peterozyma toletana* | NRRL YB-4247 | yHMPu5000034884 | P | CCA | Q | CAA | N/A | - |  |
| *Peterozyma xylosa* | NRRL Y-12939 | yHMPu5000034883 | P | CCA | Q | CAA | N/A | - |  |
| *Nakazawaea molendinolei* | CBS 12508 | yHMPu5000038384 | P56Q | CAA | Q | CAA | + | + |  |
| *Nakazawaea populi* | NRRL Y-17681 | yHMPu5000035668 | P56Q | CAA | Q | CAA | + | + |  |
| *Nakazawaea ernobii* | NRRL Y-17782 | yHMPu5000034930 | P56Q | CAA | Q | CAA | + | + |  |
| *Nakazawaea wyomingensis* | NRRL YB-2152 | yHMPu5000034924 | P56Q | CAA | Q | CAA | + | + |  |
| *Nakazawaea wickerhamii* | NRRL Y-2563 | yHMPu5000034923 | P56Q | CAA | Q | CAA | + | + |  |
| *Nakazawaea pomicola* | NRRL Y-27083 | yHMPu5000034922 | P56Q | CAA | Q | CAA | + | + |  |
| *Nakazawaea peltata* | NRRL Y-6888 | yHMPu5000034921 | P56Q | CAA | Q | CAA | + | + |  |
| *Nakazawaea ishiwadae* | NRRL Y-17654 | yHMPu5000034919 | P56Q | CAA | Q | CAA | + | + |  |
| *Nakazawaea holstii* | NRRL Y-2155 | yHMPu5000034918 | P56Q | CAA | Q | CAA | + | + |  |
| *Nakazawaea siamensis* | CBS 12569 | yHMPu5000038058 | P56Q | CAA | Q | CAA | - | + | Slow in description |
| *Nakazawaea anatomiae* | NRRL Y-17641 | yHMPu5000037862 | P56Q | CAA | Q | CAA | - | + | Slow with delay in description |

*Amino acid in position 56 of ribosomal protein eL42, either a proline (P) or a glutamine (Q indicated as P56Q)

# Amino acid in position 38 of ribosomal protein uL15, a Glutamine (Q)

Table 2 *Ascoideales*

| Species | Strain | Genome | eL42* | Codon 56 | uL15# | Codon 38 | Cycl 0.1% | Cycl 0.01% | Comment |
| --- | --- | --- | --- | --- | --- | --- | --- | --- | --- |
| *Saccharomycopsis javanensis* | NRRL Y-1483 | yHMPu5000041733 | P56Q | CAA | Q | CAA | N/A | + |  |
| *Saccharomycopsis guyanensis* | CBS 12914 | yHMPu5000038052 | P56Q | CAA | Q | CAA | N/A | + |  |
| *Saccharomycopsis olivae* | CBS 12701 | yHMPu5000038050 | P56Q | CAA | Q | CAA | N/A | + |  |
| *Saccharomycopsis oosterbeekiorum* | CBS 14943 | yHMPu5000037221 | P56Q | CAA | Q | CAA | N/A | + |  |
| *Saccharomycopsis amapae* | NRRL Y-17845 | yHMPu5000041799 | P56Q | CAA | Q | CAA | + | + |  |
| *Saccharomycopsis fermentans* | NRRL Y-17710 | yHMPu5000041797 | P56Q | CAA | Q | CAA | + | + |  |
| *Saccharomycopsis schoenii* | NRRL Y-17595 | yHMPu5000041783 | P56Q | CAA | Q | CAA | + | + |  |
| *Saccharomycopsis crataegensis* | NRRL Y-5902 | yHMPu5000041691 | P56Q | CAA | Q | CAA | + | + |  |
| *Saccharomycopsis fodiens* | NRRL Y-48786 | yHMPu5000037849 | P56Q | CAG | Q | CAG | + | + |  |
| *Saccharomycopsis babjevae* | NRRL Y-48737 | yHMPu5000037848 | P56Q | CAA | Q | CAA | + | + |  |
| *Saccharomycopsis capsularis* | NRRL Y-17639 | yHMPu5000034607 | P56Q | CAA | Q | CAA | + | + |  |
| *Saccharomycopsis lassenensis* | NRRL YB-3657 | yHMPu5000041794 | P56Q | CAA | Q | CAA | - | + |  |
| *Saccharomycopsis selenospora* | NRRL Y-1357 | yHMPu5000041784 | P56Q | CAA | Q | CAA | - | delayed | 0.01% delayed WI; no other data to compare |

*Amino acid in position 56 of ribosomal protein eL42 is a glutamine (Q indicated as P56Q))

# Amino acid in position 38 of ribosomal protein uL15, a Glutamine (Q)

Table 3 *Dipodascales*

| Species | Strain | Genome | eL42* | Codon 56 | uL15# | Codon 38 | Cycl 0.1% | Cycl 0.01% |
| --- | --- | --- | --- | --- | --- | --- | --- | --- |
| *Blastobotrys americanus* | NRRL Y-6844 | yHMPu5000034681 | P56Q | CAG | Q | CAG | N/A | + |
| *Blastobotrys muscicola* | NRRL Y-7993 | yHMPu5000034674 | P56Q | CAG | Q | CAG | N/A | + |
| *Blastobotrys peoriensis* | NRRL YB-2290 | yHMPu5000034671 | P56Q | CAG | Q | CAG | N/A | + |
| *Dipodascus siamensis* | CBS 10929 | yHMPu5000040915 | P56Q/P56Q | CAA  CAA | Q | CAA | N/A | + |
| *Dipodascus histeridarus* | NRRL Y-27729 | yHMPu5000041820 | P56Q/P56Q | CAG  CAG | Q | CAG | N/A | + |
| *Sugiyamaella americana* | NRRL YB-2067 | yHMPu5000041775 | P56Q | CAA | Q | CAA | N/A | + |
| *Sugiyamaella boreocaroliniensis* | NRRL YB-1835 | yHMPu5000041774 | P56Q | CAG | Q | CAG | N/A | + |
| *Sugiyamaella japonica* | NRRL YB-2798 | yHMPu5000041771 | P56Q | CAG | Q | CAA | N/A | + |
| *Wickerhamiella parazyma* | NRRL Y-48669 | yHMPu5000040923 | P56Q | CAG | Q | CAG | N/A | + |
| *Dipodascus ghanensis* | CBS 11010 | yHMPu5000038340 | P56Q/P56Q | CAA  CAA | Q | CAA | N/A | + |
| *Sugiyamaella marilandica* | NRRL YB-1847 | yHMPu5000038321 | P56Q | CAG | Q | CAG | N/A | + |
| *Sugiyamaella floridensis* | NRRL YB-3827 | yHMPu5000037841 | P56Q | CAG | Q | CAG | N/A | + |
| *Sugiyamaella lignohabitans* | NRRL YB-1473 | yHMPu5000037840 | P56Q | CAA | Q | CAA | N/A | + |
| *Sugiyamaella pinicola* | NRRL YB-2263 | yHMPu5000037838 | P56Q | CAA | Q | CAA | N/A | + |
| *Trichomonascus vanleenenianus* | CBS 14902 | yHMPu5000037233 | P56Q | CAG | Q | CAG | N/A | + |
| *Wickerhamiella lipophila* | NRRL Y-27367 | yHMPu5000035283 | P56Q | CAG | Q | CAG | N/A | + |
| *Blastobotrys illinoisensis* | NRRL YB-1343 | yHMPu5000034689 | P56Q | CAG | Q | CAG | N/A | + |
| *Blastobotrys chiropterorum* | NRRL Y-17071 | yHMPu5000034687 | P56Q | CAA | Q | CAG | N/A | + |
| *Blastobotrys malaysiensis* | NRRL Y-6417 | yHMPu5000034676 | P56Q | CAG | Q | CAG | N/A | + |
| *Sugiyamaella neomexicana* | NRRL YB-2450 | yHMPu5000034576 | P56Q | CAG | Q | CAA | N/A | + |
| *Candida tunisiensis* | yHDO601 | yHDO601 | P56Q | CAG | Q | CAG | N/A | + |
| *Starmerella apicola NRRL Y-2481* | NRRL Y-2481 | yHMPu5000037927 | P | CCT | Q | CAG | N/A | + |
| *Starmerella magnoliae* | NRRL Y-2024 | yHMPu5000034590 | P | CCT | Q | CAG | N/A | + |
| *Starmerella lactis-condensi* | NRRL Y-1515 | yHMPu5000040920 | P | CCC | Q | CAG | N/A | - |
| *Wickerhamiella allomyrinae* | CBS 13167 | yHMPu5000038042 | P | CCT | Q | CAG | N/A | - |
| *Starmerella asiatica* | CBS 14173 | yHMPu5000037242 | P | CCT | Q | CAG | N/A | - |
| *Starmerella vitae* | CBS 15147 | yHMPu5000037216 | P | CCC | Q | CAG | N/A | - |
| *Starmerella roubikii* | CBS 15148 | yHMPu5000037215 | P | CCG | Q | CAG | N/A | - |
| *Wickerhamiella kurtzmanii* | CBS 15383 | yHMPu5000037206 | P | CCC | Q | CAG | N/A | - |
| *Wickerhamiella domercqiae* | NRRL Y-6692 | yHMPu5000035638 | P | CCT | Q | CAG | N/A | - |
| *Nadsonia starkeyi-henricii* | NRRL YB-3963 | yHMPu5000035308 | P (2) | CCC  CCC | Q | CAA | N/A | - |
| *Nadsonia fulvescens var. fulvescens* | NRRL Y-12810 | yHMPu5000034635 | P (2) | CCC  CCC | Q | CAA | N/A | - |
| *Starmerella stellata* | NRRL Y-1446 | yHMPu5000034591 | P | CCC | Q | CAA | N/A | - |
| *Starmerella floricola* | NRRL Y-17676 | yHMPu5000034584 | P | CCC | Q | CAG | N/A | - |
| *Starmerella etchellsii* | NRRL Y-17084 | yHMPu5000034583 | P | CCC | Q | CAG | N/A | - |
| *Nadsonia commutata* | NRRL Y-7950 | yHMPu5000038059 | N/A | N/A | Q | CAA | N/A | - |
| *Sugiyamaella marionensis* | NRRL YB-1336 | yHMPu5000037839 | P56Q | CAG | Q | CAG | N/A | - |
| *Zygoascus biomembranicola* | CBS 14157 | yHMPu5000037257 | P | CCC | Q38M | ATG | N/A | + |
| *Wickerhamiella qilinensis* | CBS 13929 | yHMPu5000037255 | P | CCC | Q38M | ATG | N/A | + |
| *Zygoascus meyerae* | NRRL Y-17319 | yHMPu5000035243 | P | CCC | Q38M | ATG | + | + |
| *Crinitomyces ghanaensis* | NRRL YB-1486 | yHMPu5000035331 | P | CCT | Q38L | CTT | + | N/A |
| *Candida kazuoi* | JCM 12558 | yHMPu5000037897 | P56Q | CAG | Q38F | TTC | + | + |
| *Geotrichum cucujoidarum* | NRRL Y-27731 | yHMPu5000041821 | P56Q/P56Q | CAG  CAG | Q | CAG | + | + |
| *Spencermartinsiella ligniputridi* | NRRL Y-48818 | yHMPu5000041776 | P56Q | CAG | Q | CAG | + | N/A |
| *Sugiyamaella castrensis* | NRRL Y-17329 | yHMPu5000041773 | P56Q | CAA | Q | CAA | + | + |
| *Sugiyamaella chiloensis* | NRRL Y-17643 | yHMPu5000041772 | P56Q | CAG | Q | CAG | + | + |
| *Sugiyamaella novakii* | NRRL Y-27346 | yHMPu5000041770 | P56Q | CAA | Q | CAA | + | + |
| *Zygoascus tannicola* | NRRL Y-17392 | yHMPu5000040906 | P | CCT | Q38M | ATG | + | + |
| *Starmerella ratchasimensis* | CBS 10611 | yHMPu5000038363 | P56Q | CAG | Q | CAG | + | + |
| *Wickerhamiella azymoides* | CBS 10508 | yHMPu5000038116 | P56Q | CAG | Q | CAG | + | + |
| *Wickerhamiella sorbophila* | NRRL Y-7921 | yHMPu5000038096 | P56Q | CAG | Q | CAG | + | + |
| *Dipodascus carabidarus* | NRRL Y-27727 | yHMPu5000037875 | P56Q/P56Q | CAG  CAG | Q | CAG | + | + |
| *Candida blankii* | NRRL Y-17068 | yHMPu5000035719 | P56Q | CAG | Q | CAG | + | + |
| *Groenewaldozyma salmanticensis* | NRRL Y-17090 | yHMPu5000035691 | P56Q | CAA | Q | CAG | + | + |
| *Middelhovenomyces tepae* | NRRL Y-17670 | yHMPu5000035665 | P56Q | CAG | Q | CAA | + | + |
| *Yarrowia porcina* | NRRL Y-63669 | yHMPu5000035648 | P56Q | CAG | Q | CAG | + | + |
| *Yarrowia lipolytica NRRL YB-423* | NRRL YB-423 | yHMPu5000035647 | P56Q | CAG | Q | CAG | + | + |
| *Yarrowia keelungensis* | CBS 11062 | yHMPu5000035646 | P56Q | CAG | Q | CAG | + | + |
| *Yarrowia deformans* | NRRL Y-321 | yHMPu5000035644 | P56Q | CAG | Q | CAG | + | + |
| *Yarrowia bubula* | NRRL Y-63668 | yHMPu5000035643 | P56Q | CAG | Q | CAG | + | + |
| *Yarrowia galli* | CBS 9722 | yHMPu5000035635 | P56Q | CAG | Q | CAG | + | + |
| *Yarrowia hollandica* | NRRL Y-48254 | yHMPu5000035632 | P56Q | CAG | Q | CAG | + | + |
| *Yarrowia phangngaensis* | NRRL Y- 63743 | yHMPu5000035630 | P56Q | CAG | Q | CAG | + | + |
| *Groenewaldozyma auringiensis* | NRRL Y-17674 | yHMPu5000035320 | P56Q | CAG | Q | CAG | + | + |
| *Groenewaldozyma tartarivorans* | NRRL Y-27291 | yHMPu5000035319 | P56Q | CAG | Q | CAG | + | + |
| *Wickerhamiella occidentalis* | NRRL Y-27364 | yHMPu5000035284 | P56Q | CAG | Q | CAG | + | + |
| *Wickerhamiella vanderwaltii* | NRRL Y-17671 | yHMPu5000035275 | P56Q | CAA | Q | CAG | + | + |
| *Candida incommunis* | NRRL Y-17085 | yHMPu5000035244 | P56Q | CAA | Q | CAA | + | + |
| *Trichomonascus apis* | NRRL Y-48475 | yHMPu5000034860 | P56Q | CAA | Q | CAA | + | + |
| *Blastobotrys adeninivorans* | NRRL Y-17692 | yHMPu5000034680 | P56Q | CAG | Q | CAG | + | + |
| *Blastobotrys mokoenaii* | NRRL Y-27120 | yHMPu5000034675 | P56Q | CAG | Q | CAG | + | + |
| *Blastobotrys parvus* | NRRL Y-1004 | yHMPu5000034672 | P56Q | CAA | Q | CAA | + | + |
| *Blastobotrys raffinosifermentans* | NRRL Y-27150 | yHMPu5000034669 | P56Q | CAG | Q | CAG | + | + |
| *Blastobotrys robertii* | NRRL Y-27775 | yHMPu5000034668 | P56Q | CAG | Q | CAG | + | + |
| *Wickerhamiella cacticola* | NRRL Y-27362 | yHMPu5000034646 | P56Q | CAG | Q | CAG | + | + |
| *Spencermartinsiella europaea* | NRRL Y-48265 | yHMPu5000034605 | P56Q | CAG | Q | CAG | + | + |
| *Wickerhamiella australiensis* | NRRL Y-27360 | yHMPu5000034589 | P56Q | CAG | Q | CAG | + | + |
| *Starmerella floris* | NRRL Y-48255 | yHMPu5000034585 | P56Q | CAG | Q | CAG | + | + |
| *Zygoascus hellenicus* | NRRL Y-7136 | yHMPu5000034578 | P | CCT | Q38M | ATG | + | + |
| *Sugiyamaella grinbergsii* | NRRL Y-27117 | yHMPu5000034577 | P56Q | CAA | Q | CAA | + | + |
| *Sugiyamaella paludigena* | NRRL Y-12697 | yHMPu5000034575 | P56Q | CAA | Q | CAG | + | + |
| *Sugiyamaella smithiae* | NRRL Y-17850 | yHMPu5000034574 | P56Q | CAG | Q | CAG | + | + |
| *Sugiyamaella valdiviana* | NRRL Y-7791 | yHMPu5000034573 | P56Q | CAG | Q | CAG | + | + |
| *Starmerella khaoyaiensis* | NBRC 104213 | yHMPu5000038107 | P56Q | CAG | Q | CAG | + | + |
| *Starmerella scarabaei* | CBS 14174 | yHMPu5000037241 | P56Q | CAG | Q | CAG | + | + |
| *Yarrowia brassicae* | CBS 15225 | yHMPu5000037212 | P56Q | CAG | Q | CAG | + | N/A |
| *Yarrowia alimentaria* | NRRL Y-48253 | yHMPu5000035636 | P56Q | CAG | Q | CAG | + | N/A |
| *Yarrowia osloensis* | NRRL Y-48252 | yHMPu5000035631 | P56Q | CAG | Q | CAG | + | N/A |
| *Deakozyma indianensis* | NRRL YB-1937 | yHMPu5000034974 | P56Q | CAG | Q | CAG | + | N/A |
| *Wickerhamiella nectarea* | CBS 14162 | yHMPu5000026090 | P56Q | CAG | Q | CAG | + | N/A |
| *Diddensiella caesifluorescens* | NRRL Y-48781 | yHMPu5000034660 | P56Q | GAA | Q | CAA | + | N/A |
| *Diddensiella santjacobensis* | NRRL Y-17667 | yHMPu5000035323 | P56Q | GAA | Q | CAG | + | N/A |
| *Candida patagonica* | yHDO589 | yHDO589 | P56Q | CAG | Q38L | TTG | + | + |
| *Starmerella davenportii* | CBS 9069 | yHMPu5000038394 | P56E | CCC | Q | CAG | - | - |
| *Geotrichum phurueaensis* | CBS 11418 | yHMPu5000038339 | P56Q/P56Q | CAG  CAG | Q | CAG | - | - |
| *Wickerhamiella siamensis* | CBS 13331 | yHMPu5000038046 | P56Q | CAG | Q | CAG | - | - |
| *Blastobotrys persicus* | CBS 14259 | yHMPu5000037236 | P56Q | CAG | Q | CAG | - | - |
| *Starmerella bombi* | NRRL Y-17081 | yHMPu5000026296 | P | CCT | Q | CAG | - | - |
| *Wickerhamiella galacta* | NRRL Y-17645 | yHMPu5000041860 | P | CCC | Q | CAG | - | - |
| *Starmerella powellii* | CBS 8795 | yHMPu5000040924 | P | CCT | Q | CAG | - | - |
| *Starmerella sirachaensis* | NBRC 108605 | yHMPu5000038094 | P | CCG | Q | CAG | - | - |
| *Wickerhamiella pararugosa* | NRRL Y-17089 | yHMPu5000035277 | P | CCC | Q | CAG | - | - |
| *Candida spandovensis* | NRRL Y-17761 | yHMPu5000035276 | P | CCT | Q | CAG | - | - |
| *Starmerella apis* | NRRL Y-2482 | yHMPu5000034595 | P | CCT | Q | CAG | - | - |
| *Starmerella gropengiesseri* | NRRL Y-17142 | yHMPu5000034587 | P | CCT | Q | CAG | - | - |
| *Starmerella geochares* | NRRL Y-17073 | yHMPu5000034586 | P | CCT | Q | CAG | - | - |
| *Starmerella tilneyi* | CBS 8794 | yHMPu5000038358 | P | CCT | Q | CAG | - | - |
| *Wickerhamiella brachini* | CBS 14176 | yHMPu5000037239 | P | CCT | Q | CAG | - | - |
| *Starmerella bacillaris* | CBS 9494 | yHMPu5000036545 | P | CCC | Q | CAA | - | + |
| *Wickerhamiella versatilis* | NRRL Y-6652 | yHMPu5000038361 | P | CCT | Q | CAG | - | + |
| *Starmerella potacharoeniae* | NBRC 106439 | yHMPu5000038088 | P | CCT | Q | CAG | - | + |
| *Wickerhamiella hasegawae* | JCM 12559 | yHMPu5000037894 | P | CCC | Q | CAG | - | N/A |
| *Starmerella bombicola* | NRRL Y-17069 | yHMPu5000035657 | P | CCC | Q | CAG | - | N/A |
| *Starmerella vaccinii* | NRRL Y-17684 | yHMPu5000035290 | P | CCT | Q | CAG | - | N/A |
| *Wickerhamiella bombiphila* | NRRL Y-27640 | yHMPu5000035287 | P | CCC | Q | CAG | - | N/A |

*Amino acid in position 56 of ribosomal protein eL42 either a proline (P) or a glutamine (Q indicated as P56Q) – numbers in brackets indicate gene copy greater than one

# Amino acid in position 38 of ribosomal protein uL15, a Glutamine or a substitution of leucine , phenylalanine or methionine (indicated as Q38L, Q38F or Q38M)

Species where the genotype does not directly reflect the phenotype are indicated in yellow

Table 4 *Lipomycetales*

| Species | Strain | Genome | eL42* | Codon 56 | uL15# | Codon 38 | Cycl 0.1% | Cycl 0.01% | Comment |
| --- | --- | --- | --- | --- | --- | --- | --- | --- | --- |
| *Myxozyma udenii* | NRRL Y-17387 | yHMPu5000034736 | P56Q | CAG | Q38A | GCC | N/A | - | Differs from publication and needs to be re-evaluated |
| *Lipomyces spencermartinsiae* | NBRC 10376 | yHMPu5000037879 | P56Q | CAG | Q38A | GCA | + | + |  |
| *Lipomyces kononenkoae* | NRRL Y-63818 | yHMPu5000037878 | P56Q | CAG | Q38A | GCG | + | + |  |
| *Lipomyces lipofer* | NRRL Y-11555 | yHMPu5000034761 | P56Q | CAG | Q | CAG | + | + |  |
| *Lipomyces sp. NRRL Y-11553* | NRRL Y-11553 | yHMPu5000034760 | P56Q | CAG | Q38A | GCG | + | + |  |
| *Lipomyces kockii* | NRRL Y-27505 | yHMPu5000034759 | P56Q | CAG | Q38A | GCA | + | + |  |
| *Lipomyces japonicus* | NRRL Y-17848 | yHMPu5000034758 | P56Q | CAG | Q | CAG | + | + |  |
| *Lipomyces chichibuensis* | CBS 12929 | yHMPu5000034755 | P56Q | CAA | Q38A | GCA | + | + |  |
| *Lipomyces arxii* | NRRL Y-17921 | yHMPu5000034754 | P56Q | CAG | Q38M | ATG | + | + |  |
| *Lipomyces oligophaga* | NRRL Y-17247 | yHMPu5000034748 | P56Q | CAG | Q38M | ATG | + | + |  |
| *Limtongia smithiae* | NRRL Y-17922 | yHMPu5000034746 | P56Q | CAG | Q38M | ATG | + | + |  |
| *Kockiozyma suomiensis* | NRRL Y-17356 | yHMPu5000034742 | P56Q | CAG | Q | CAG | + | + |  |
| *Lipomyces tetrasporus* | NRRL Y-11562 | yHMPu5000034741 | P56Q | CAG | Q | CAG | + | + |  |
| *Lipomyces yamadae* | NRRL Y-27507 | yHMPu5000034740 | P56Q | CAG | Q38A | GCG | + | + |  |
| *Lipomyces yarrowii* | CBS 7557 | yHMPu5000034739 | P56Q | CAG | Q38A | GCG | + | + |  |
| *Myxozyma monticola* | NRRL Y-17726 | yHMPu5000034730 | P56Q | CAG | Q38M | ATG | + | + |  |
| *Myxozyma lipomycoides* | NRRL Y-17253 | yHMPu5000034728 | P56Q | CAA | Q38A | GCT | + | + |  |
| *Myxozyma kluyveri* | NRRL Y-17277 | yHMPu5000034727 | P56Q | CAA | Q38M | ATG | + | + |  |
| *Myxozyma melibiosi* | NRRL Y-11781 | yHJFW85 | P56Q | CAG | Q | CAG | + | + |  |
| *Myxozyma geophila* | NRRL Y-17252 | yHJFW83 | P56Q | CAG | Q | GCG | + | + |  |
| *Myxozyma mucilagina* | NRRL Y-11823 | yHDO354 | P56Q | CAG | Q | CAG | + | + |  |
| *Lipomyces yamanashiensis* | CBS 14748 | yHMPu5000037231 | P56Q | CAG | Q | CAG | + | N/A |  |
| *Lipomyces orientalis* | NRRL Y-27927 | yHMPu5000034747 | P56Q | CAG | Q | CAG | + | N/A |  |
| *Badjevia anomala* | yHDO599 | yHDO599 | P56Q | CAG | Q | CAA | - | N/A | Differs from publication and I needs to be re-evaluated |

*Amino acid in position 56 of ribosomal protein eL42 either a proline (P) or a glutamine (Q indicated as P56Q))

# Amino acid in position 38 of ribosomal protein uL15, a Glutamine or a substitution of Alanine or methionine (indicated as Q38A or Q38M)

Species, where Westerdijk data is different from the publication and should be reanalysed, are indicated in green

Table 5 *Phaffomycetales*

| Species | Strain | Genome | eL42* | Codon 56 | uL15# | Codon 38 | Cycl 0.1% | Cycl 0.01% |
| --- | --- | --- | --- | --- | --- | --- | --- | --- |
| *Candida ficus* | CBS 12638 | yHMPu5000038389 | P | CCA | Q | CAA | N/A | - |
| *Cyberlindnera rhodanensis* | NRRL Y-7854 | yHMPu5000038346 | P | CCA | Q | CAG | N/A | - |
| *Cyberlindnera veronae* | NRRL Y-7818 | yHMPu5000038345 | P | CCA | Q | CAG | N/A | - |
| *Wickerhamomyces chaumierensis* | CBS 8565 | yHMPu5000038316 | P | CCA | Q | CAA | N/A | - |
| *Candida coquimbonensis* | CBS 12348 | yHMPu5000038119 | P | CCA | Q | CAA | N/A | - |
| *Candida adriatica* | CBS 12504 | yHMPu5000038113 | P | CCA | Q | CAG | N/A | - |
| *Candida ulmi* | NRRL YB-2694 | yHMPu5000038075 | P | CCA | Q | CAA | N/A | - |
| *Cyberlindnera bimundalis* | NRRL Y-5343 | yHMPu5000038067 | P | CCA | Q | CAG | N/A | - |
| *Wickerhamomyces mucosus* | NRRL YB-1344 | yHMPu5000038048 | P | CCA | Q | CAA | N/A | - |
| *Candida odintsovae* | NRRL Y-17760 | yHMPu5000037905 | P | CCA | Q | CAA | N/A | - |
| *Candida quercuum* | NRRL Y-12942 | yHMPu5000037888 | P | CCA | Q | CAA | N/A | - |
| *Cyberlindnera euphorbiiphila* | NRRL Y-12742 | yHMPu5000037872 | P | CCA | Q | CAG | N/A | - |
| *Starmera caribaea* | NRRL Y-17468 | yHMPu5000037842 | P | CCA | Q | CAA | N/A | - |
| *Cyberlindnera galapagoensis* | CBS 13997 | yHMPu5000037256 | P | CCA | Q | CAA | N/A | - |
| *Cyberlindnera xishuangbannaensis* | CBS 14692 | yHMPu5000037227 | P | CCA | Q | CAG | N/A | - |
| *Cyberlindnera americana* | NRRL Y-2156 | yHMPu5000035703 | P | CCA | Q | CAG | N/A | - |
| *Cyberlindnera fabianii* | NRRL Y-1871 | yHMPu5000035701 | P | CCA | Q | CAG | N/A | - |
| *Cyberlindnera japonica* | NRRL YB-2750 | yHMPu5000035700 | P | CCA | Q | CAG | N/A | - |
| *Cyberlindnera meyerae* | NRRL Y-17236 | yHMPu5000035698 | P | CCA | Q | CAG | N/A | - |
| *Candida vartiovaarae* | NRRL Y-6701 | yHMPu5000035690 | P | CCA | Q | CAA | N/A | - |
| *Cyberlindnera xylosilytica* | NRRL YB-2097 | yHMPu5000035688 | P | CCA | Q | CAG | N/A | - |
| *Cyberlindnera suaveolens* | NRRL Y-17391 | yHMPu5000035687 | P | CCA | Q | CAA | N/A | - |
| *Cyberlindnera saturnus* | NRRL Y-17396 | yHMPu5000035686 | P | CCA | Q | CAA | N/A | - |
| *Phaffomyces opuntiae* | NRRL Y-11707 | yHMPu5000035670 | P | CCA | Q | CAA | N/A | - |
| *Starmera amethionina* | NRRL Y-10978 | yHMPu5000035658 | P | CCA | Q | CAA | N/A | - |
| *Wickerhamomyces canadensis* | NRRL Y-1888 | yHMPu5000035639 | P | CCA | Q | CAA | N/A | - |
| *Cyberlindnera jadinii* | NRRL Y-1542 | yHMPu5000035336 | P | CCA | Q | CAA | N/A | - |
| *Cyberlindnera petersonii* | NRRL YB-3808 | yHMPu5000035325 | P | CCA | Q | CAG | N/A | - |
| *Cyberlindnera subsufficiens* | NRRL YB-1657 | yHMPu5000035324 | P | CCA | Q | CAA | N/A | - |
| *Wickerhamomyces alni* | NRRL Y-11625 | yHMPu5000035274 | P | CCA | Q | CAA | N/A | - |
| *Wickerhamomyces anomalus* | NRRL Y-366 | yHMPu5000035273 | P | CCA | Q | CAA | N/A | - |
| *Wickerhamomyces bisporus* | NRRL Y-1482 | yHMPu5000035272 | P | CCA | Q | CAA | N/A | - |
| *Wickerhamomyces bovis* | NRRL YB-4184 | yHMPu5000035271 | P | CCA | Q | CAA | N/A | - |
| *Wickerhamomyces chambardii* | NRRL Y-2378 | yHMPu5000035270 | P | CCA | Q | CAA | N/A | - |
| *Wickerhamomyces ciferrii* | NRRL Y-1031 | yHMPu5000035269 | P (2) | CCA  CCA | Q | CAA | N/A | - |
| *Wickerhamomyces hampshirensis* | NRRL YB-4128 | yHMPu5000035268 | P | CCA | Q | CAA | N/A | - |
| *Wickerhamomyces lynferdii* | NRRL Y-7723 | yHMPu5000035267 | P (2) | CCA  CCA | Q | CAA | N/A | - |
| *Wickerhamomyces onychis* | NRRL Y-7123 | yHMPu5000035266 | P | CCA | Q | CAA | N/A | - |
| *Candida solani* | NRRL Y-2224 | yHMPu5000035263 | P | CCA | Q | CAA | N/A | - |
| *Candida silvicultrix* | NRRL Y-7789 | yHMPu5000035262 | P | CCA | Q | CAA | N/A | - |
| *Wickerhamomyces sydowiorum* | NRRL Y-7130 | yHMPu5000035259 | P | CCA | Q | CAA | N/A | - |
| *Wickerhamomyces subpelliculosus* | NRRL Y-1683 | yHMPu5000035258 | P | CCA | Q | CAA | N/A | - |
| *Wickerhamomyces strasburgensis* | NRRL Y-2383 | yHMPu5000035257 | P | CCT | Q | CAA | N/A | - |
| *Wickerhamomyces rabaulensis* | NRRL Y-7945 | yHMPu5000035255 | P | CCA | Q | CAA | N/A | - |
| *Wickerhamomyces pijperi* | NRRL YB-4309 | yHMPu5000035254 | P | CCA | Q | CAA | N/A | - |
| *Barnettozyma wickerhamii* | NRRL Y-2435 | yHMPu5000035049 | P | CCA | Q | CAG | N/A | - |
| *Barnettozyma salicaria* | NRRL Y-6780 | yHMPu5000035048 | P | CCA | Q | CAA | N/A | - |
| *Barnettozyma pratensis* | NRRL Y-12696 | yHMPu5000035047 | P | CCA | Q | CAA | N/A | - |
| *Barnettozyma populi* | NRRL Y-12728 | yHMPu5000035046 | P | CCA | Q | CAA | N/A | - |
| *Barnettozyma hawaiiensis* | NRRL Y-27270 | yHMPu5000035045 | P | CCA | Q | CAA | N/A | - |
| *Barnettozyma californica* | NRRL Y-17395 | yHMPu5000035044 | P | CCA | Q | CAA | N/A | - |
| *Cyberlindnera euphorbiae* | NRRL Y-17232 | yHMPu5000034981 | P | CCA | Q | CAG | N/A | - |
| *Cyberlindnera lachancei* | NRRL Y-27008 | yHMPu5000034980 | P | CCA | Q | CAA | N/A | - |
| *Cyberlindnera mrakii* | NRRL Y-1364 | yHMPu5000034978 | P | CCA | Q | CAA | N/A | - |
| *Cyberlindnera maritima* | NRRL Y-17775 | yHMPu5000034968 | P | CCA | Q | CAG | N/A | - |
| *Candida norvegica* | NRRL Y-17660 | yHMPu5000034954 | P | CCA | Q | CAA | N/A | - |
| *Starmera pachycereana* | NRRL Y-10981 | yHMPu5000034602 | P | CCA | Q | CAA | N/A | - |
| *Starmera stellimalicola* | NRRL Y-17912 | yHMPu5000034597 | P | CCA | Q | CAA | N/A | - |
| *Starmera quercuum* | NRRL YB-4281 | yHMPu5000034594 | P | CCA | Q | CAA | N/A | - |
| *Wickerhamomyces silvicola* | NRRL Y-1678 | yHMPu5000026170 | P | CCA | Q | CAA | N/A | - |
| *Cyberlindnera maclurae* | NRRL Y-5377 | yHMPu5000035699 | P56Q | CAG | Q | CAG | + | + |
| *Cyberlindnera misumaiensis* | NRRL Y-17389 | yHMPu5000034979 | P56Q | CAG | Q | CAA | + | + |
| *Starmera dryadoides* | NRRL Y-10990 | yHMPu5000034601 | P56Q | CAA | Q | CAA | + | + |
| *Candida dendrica* | NRRL Y-7775 | yHMPu5000034598 | P56Q | CAA | Q | CAA | + | + |
| *Candida galis* | NRRL Y-48037 | yHMPu5000040931 | P | CCA | Q | CAA | - | - |
| *Candida dajiaensis* | CBS 10590 | yHMPu5000038396 | P | CCA | Q | CAA | - | - |
| *Candida jianshihensis* | CBS 10591 | yHMPu5000038386 | P | CCA | Q | CAA | - | - |
| *Candida qinlingensis* | CBS 9768 | yHMPu5000038364 | P | CCA | Q | CAA | - | - |
| *Candida sanyiensis* | CBS 10592 | yHMPu5000038351 | P | CCT | Q | CAA | - | - |
| *Candida yuanshanica* | CBS 10589 | yHMPu5000038347 | P | CCA | Q | CAA | - | - |
| *Candida hungchunana* | CBS 12243 | yHMPu5000038121 | P | CCA | Q | CAG | - | - |
| *Candida maesae* | CBS 12240 | yHMPu5000038105 | P | CCA | Q | CAG | - | - |
| *Candida stauntonica* | CBS 12241 | yHMPu5000038084 | P | CCA | Q | CAG | - | - |
| *Candida takata* | CBS 12244 | yHMPu5000038081 | P | CCA | Q | CAG | - | - |
| *Candida taoyuanica* | CBS 12242 | yHMPu5000038078 | P | CCA | Q | CAG | - | - |
| *Wickerhamomyces xylosica* | NBRC 108869 | yHMPu5000038049 | P | CCA | Q | CAA | - | - |
| *Cyberlindnera amylophila* | NRRL YB-1287 | yHMPu5000035702 | P | CCA | Q | CAG | - | - |
| *Cyberlindnera mycetangii* | NRRL Y-6843 | yHMPu5000035689 | P | CCA | Q | CAG | - | - |
| *Phaffomyces thermotolerans* | NRRL Y-11709 | yHMPu5000035672 | P | CCA | Q | CAA | - | - |
| *Phaffomyces antillensis* | NRRL Y-12881 | yHMPu5000035671 | P | CCA | Q | CAA | - | - |
| *Cyberlindnera mississippiensis* | NRRL YB-1294 | yHMPu5000035337 | P | CCA | Q | CAG | - | - |
| *Candida ponderosae* | NRRL YB-2307 | yHMPu5000035261 | P | CCA | Q | CAA | - | - |
| *Candida peoriensis* | NRRL YB-1497 | yHMPu5000035260 | P | CCA | Q | CAA | - | - |
| *Candida montana* | NRRL Y-17326 | yHMPu5000035037 | P | CCA | Q | CAA | - | - |
| *Cyberlindnera sargentensis* | NRRL YB-4139 | yHMPu5000034966 | P | CCA | Q | CAA | - | - |
| *Candida namnaoensis* | CBS 12175 | yHMPu5000038385 | P | CCT | Q | CAA | - | N/A |
| *Wickerhamomyces tratensis* | CBS 12176 | yHMPu5000038315 | P | CCT | Q | CAA | - | N/A |
| *Cyberlindnera samutprakarnensis* | CBS 12528 | yHMPu5000038068 | P | CCA | Q | CAA | - | N/A |
| *Cyberlindnera nakhonratchasimensis* | JCM 12474 | yHMPu5000037904 | P | CCA | Q | CAG | - | N/A |
| *Candida easanensis* | JCM 12476 | yHMPu5000026073 | P | CCA | Q | CAG | - | N/A |

*Amino acid in position 56 of ribosomal protein eL42 either a proline (P) or a glutamine (Q indicated as P56Q) - numbers in brackets indicate gene copy greater than one

# Amino acid in position 38 of ribosomal protein uL15, a Glutamine (Q)

Table 6 *Pichiales*

| Species | Strain | Genome | eL42* | Codon 56 | uL15# | Codon 38 | Cycl 0.1% | Cycl 0.01% | Comment |
| --- | --- | --- | --- | --- | --- | --- | --- | --- | --- |
| *Kuraishia capsulata* | NRRL Y-1842 | yHMPu5000034937 | P | CCA | Q38L | TTG | weak | - |  |
| *Candida pini* | NRRL Y-2023 | yHMPu5000034913 | P56Q | CAA | Q | CAA | weak | weak |  |
| *Ogataea henricii* | NRRL YB-2194 | yHMPu5000026124 | P56Q | CAA | Q | CAA | N/A | - | needs to be re-evaluated |
| *Candida ortonii* | NRRL Y-48038 | yHMPu5000041847 | P56Q | CAA | Q | CAA | N/A | + |  |
| *Ogataea degrootiae* | CBS 15033 | yHMPu5000037218 | P56Q | CAA | Q | CAA | N/A | + |  |
| *Candida xyloterini* | CBS 11547 | yHMPu5000036579 | P56Q | CAA | Q | CAA | N/A | + |  |
| *Brettanomyces bruxellensis* | NRRL Y-12961 | yHMPu5000034975 | P56Q | CAG | Q | CAG | N/A | + |  |
| *Ambrosiozyma angophorae* | NRRL Y-7118 | yHMPu5000034942 | P56Q | CAA | Q | CAA | N/A | + |  |
| *Candida nitratophila* | NRRL YB-3654 | yHMPu5000034916 | P56Q | CAA | Q | CAA | N/A | + |  |
| *Candida succiphila* | NRRL Y-11998 | yHMPu5000034906 | P56Q | CAA | Q | CAA | N/A | + |  |
| *Ogataea kodamae* | NRRL Y-17234 | yHMPu5000034899 | P56Q | CAA | Q | CAA | N/A | + |  |
| *Ogataea glucozyma* | NRRL YB-2185 | yHMPu5000034897 | P56Q | CAA | Q | CAA | N/A | + |  |
| *Ogataea zsoltii* | NRRL Y-27601 | yHMPu5000034885 | P56Q | CAA | Q | CAA | N/A | + |  |
| *Candida methanosorbosa* | NRRL Y-17320 | yHMPu5000026143 | P56Q | CAA | Q | CAA | N/A | + |  |
| *Candida silvatica* | NRRL Y-7777 | yHMPu5000041830 | P | CCA | Q | CAG | N/A | - |  |
| *Saturnispora halmiae* | CBS 11009 | yHMPu5000040912 | P | CCA | Q | CAA | N/A | - |  |
| *Candida awuae* | CBS 11011 | yHMPu5000038403 | P | CCA | Q | CAA | N/A | - |  |
| *Candida inconspicua* | NRRL Y-2029 | yHMPu5000038388 | N/A | N/A | Q | CAA | N/A | - |  |
| *Pichia cactophila* | NRRL Y-10963 | yHMPu5000038335 | P | CCA | Q | CAA | N/A | - |  |
| *Candida pseudolambica* | NRRL Y-17318 | yHMPu5000038091 | P | CCA | Q | CAA | N/A | - |  |
| *Candida thaimueangensis* | NBRC 101967 | yHMPu5000038077 | P | CCA | Q | CAA | N/A | - |  |
| *Pichia insulana* | CBS 11169 | yHMPu5000038055 | P | CCA | Q | CAA | N/A | - |  |
| *Candida sorboxylosa* | NRRL Y-17669 | yHMPu5000037882 | P | CCT | Q | CAA | N/A | - |  |
| *Saturnispora ahearnii* | NRRL Y-7555 | yHMPu5000037851 | P | CCA | Q | CAA | N/A | - |  |
| *Pichia gijzenarium* | CBS 15024 | yHMPu5000037219 | P | CCA | Q | CAA | N/A | - |  |
| *Saturnispora galanensis* | CBS 15223 | yHMPu5000037213 | P | CCT | Q | CAA | N/A | - |  |
| *Pichia paraexigua* | CBS 15237 | yHMPu5000037198 | P | CCA | Q | CAA | N/A | - |  |
| *Kregervanrija fluxuum* | NRRL YB-4273 | yHMPu5000035675 | P | CCA | Q | CAA | N/A | - |  |
| *Kregervanrija delftensis* | NRRL Y-7119 | yHMPu5000035674 | P | CCA | Q | CAA | N/A | - |  |
| *Pichia membranifaciens* | NRRL Y-2026 | yHMPu5000035661 | P | CCA | Q | CAA | N/A | - |  |
| *Saturnispora dispora* | NRRL Y-1447 | yHMPu5000035659 | P | CCA | Q | CAA | N/A | - |  |
| *Candida insectalens* | NRRL Y-7778 | yHMPu5000035332 | P | CCA | Q | CAA | N/A | - |  |
| *Pichia scutulata* | NRRL Y-7663 | yHMPu5000035309 | P | CCA | Q | CAA | N/A | - |  |
| *Pichia terricola* | NRRL YB-4310 | yHMPu5000035301 | P | CCA | Q | CAA | N/A | - |  |
| *Candida californica* | NRRL Y-27254 | yHMPu5000035298 | P | CCA | Q | CAA | N/A | - |  |
| *Saturnispora diversa* | NRRL Y-5713 | yHMPu5000035293 | P | CCA | Q | CAA | N/A | - |  |
| *Martiniozyma abietophila* | NRRL Y-11514 | yHMPu5000034631 | P | CCA | Q | CAA | N/A | - |  |
| *Pichia exigua* | NRRL Y-10920 | yHMPu5000034629 | P | CCA | Q | CAA | N/A | - |  |
| *Pichia fermentans* | NRRL Y-1619 | yHMPu5000034628 | P | CCA | Q | CAA | N/A | - |  |
| *Pichia heedii* | NRRL Y-10967 | yHMPu5000034627 | P | CCA | Q | CAA | N/A | - |  |
| *Pichia kluyveri* | NRRL Y-11519 | yHMPu5000034626 | P | CCA | Q | CAA | N/A | - |  |
| *Pichia kudriavzevii* | NRRL Y-5396 | yHMPu5000034625 | P | CCA | Q | CAA | N/A | - |  |
| *Pichia nakasei* | NRRL Y-7686 | yHMPu5000034624 | P | CCA | Q | CAA | N/A | - |  |
| *Pichia norvegensis* | NRRL Y-7687 | yHMPu5000034623 | P | CCA | Q | CAA | N/A | - |  |
| *Candida ethanolica* | NRRL Y-12615 | yHMPu5000034619 | P | CCA | Q | CAA | N/A | - |  |
| *Candida rugopelliculosa* | NRRL Y-17079 | yHMPu5000034618 | P | CCA | Q | CAA | N/A | - |  |
| *Saturnispora zaruensis* | NRRL Y-7008 | yHMPu5000034615 | P | CCA | Q | CAA | N/A | - |  |
| *Saturnispora silvae* | NRRL Y-6725 | yHMPu5000034614 | P | CCA | Q | CAA | N/A | - |  |
| *Saturnispora serradocipensis* | NRRL Y-48717 | yHMPu5000034613 | P | CCA | Q | CAA | N/A | - |  |
| *Saturnispora saitoi* | NRRL Y-6671 | yHMPu5000034612 | P | CCA | Q | CAA | N/A | - |  |
| *Saturnispora mendoncae* | NRRL Y-11515 | yHMPu5000034611 | P | CCA | Q | CAA | N/A | - |  |
| *Saturnispora gosingensis* | NRRL Y-48718 | yHMPu5000034609 | P | CCA | Q | CAA | N/A | - |  |
| *Pichia pseudocactophila* | NRRL Y-17239 | yHMPu5000026208 | P | CCA | Q | CAA | N/A | - |  |
| *Citeromyces nyonsensis* | CBS 12700 | yHDO587 | P | CCA | Q | CAA | N/A | - |  |
| *Ogataea minuta* | NRRL Y-411 | yHMPu5000034902 | P56Q | CAA | Q38L | CTG | + | + |  |
| *Candida krabiensis* | NRRL Y-27965 | yHMPu5000041851 | P56Q | CAA | Q | CAA | + | + |  |
| *Ogataea polymorpha* | NRRL Y-5445 | yHMPu5000041802 | P56Q | CAA | Q | CAA | + | + |  |
| *Candida ovalis* | NRRL Y-17662 | yHMPu5000037893 | P56Q | CAA | Q | CAA | + | + |  |
| *Candida sithepensis* | JCM 12265 | yHMPu5000037884 | P56Q | CAA | Q | CAA | + | + |  |
| *Ogataea allantospora* | NRRL Y-48267 | yHMPu5000037861 | P56Q | CAA | Q | CAA | + | + |  |
| *Ogataea siamensis* | NRRL Y-27963 | yHMPu5000035310 | P56Q | CAA | Q | CAA | + | + |  |
| *Ambrosiozyma llanquihuensis* | NRRL Y-17657 | yHMPu5000035039 | P56Q | CAA | Q | CAA | + | + |  |
| *Ambrosiozyma kashinagicola* | NRRL Y-63631 | yHMPu5000035038 | P56Q | CAA | Q | CAA | + | + |  |
| *Brettanomyces anomalus* | NRRL Y-17522 | yHMPu5000034976 | P56Q | CAG | Q | CAG | + | + |  |
| *Brettanomyces naardenensis* | NRRL Y-17526 | yHMPu5000034965 | P56Q | CAG | Q | CAG | + | + |  |
| *Komagataella pastoris* | NRRL Y-1603 | yHMPu5000034953 | P56Q | CAG | Q | CAA | + | + |  |
| *Ambrosiozyma platypodis* | NRRL Y-6732 | yHMPu5000034948 | P56Q | CAA | Q | CAA | + | + |  |
| *Ambrosiozyma philentoma* | NRRL Y-7523 | yHMPu5000034947 | P56Q | CAA | Q | CAA | + | + |  |
| *Ambrosiozyma oregonensis* | NRRL Y-6106 | yHMPu5000034946 | P56Q | CAA | Q | CAA | + | + |  |
| *Kuraishia cidri* | NRRL Y-27078 | yHMPu5000034936 | P56Q | CAG | Q | CAG | + | + |  |
| *Kuraishia floccosa* | NRRL Y-27951 | yHMPu5000034935 | P56Q | CAG | Q | CAG | + | + |  |
| *Kuraishia ogatae* | NRRL Y-48474 | yHMPu5000034932 | P56Q | CAG | Q38M | ATG | + | + |  |
| *Candida nanaspora* | NRRL Y-17679 | yHMPu5000034929 | P56Q | CAA | Q | CAA | + | + |  |
| *Candida boidinii* | NRRL Y-2332 | yHMPu5000034926 | P56Q | CAA | Q | CAA | + | + |  |
| *Candida arabinofermentans* | NRRL YB-2248 | yHMPu5000034925 | P56Q | CAA | Q | CAA | + | + |  |
| *Candida nemodendra* | NRRL Y-7779 | yHMPu5000034917 | P56Q | CAA | Q | CAA | + | + |  |
| *Candida sonorensis* | NRRL Y-7800 | yHMPu5000034912 | P56Q | CAA | Q | CAA | + | + |  |
| *Ogataea nonfermentans* | NRRL YB-2203 | yHMPu5000034904 | P56Q | CAG | Q | CAG | + | + |  |
| *Ogataea naganishii* | NRRL Y-7654 | yHMPu5000034903 | P56Q | CAG | Q | CAG | + | + |  |
| *Ogataea methanolica* | NRRL Y-7685 | yHMPu5000034900 | P56Q | CAA | Q | CAA | + | + |  |
| *Ogataea dorogensis* | NRRL Y-27599 | yHMPu5000034896 | P56Q | CAA | Q | CAA | + | + |  |
| *Ogataea angusta* | NRRL Y-2214 | yHMPu5000034895 | P56Q | CAA | Q | CAA | + | + |  |
| *Ogataea philodendri* | NRRL Y-7210 | yHMPu5000034893 | P56Q | CAA | Q | CAG | + | + |  |
| *Ogataea pilisensis* | NRRL Y-27598 | yHMPu5000034892 | P56Q | CAA | Q | CAA | + | + |  |
| *Ogataea ramenticola* | NRRL YB-1985 | yHMPu5000034890 | P56Q | CAA | Q | CAA | + | + |  |
| *Ogataea salicorniae* | NRRL Y-12834 | yHMPu5000034889 | P56Q | CAA | Q | CAA | + | + |  |
| *Ogataea trehalophila* | NRRL Y-6781 | yHMPu5000034886 | P56Q | CAA | Q | CAA | + | + |  |
| *Ogataea wickerhamii* | NRRL YB-4943 | yHMPu5000034638 | P56Q | CAG | Q | CAG | + | + |  |
| *Ogataea populi-albae* | NRRL Y-48632 | yHMPu5000034637 | P56Q | CAG | Q | CAG | + | + |  |
| *Candida pignaliae* | NRRL Y-17664 | yHMPu5000026167 | P56Q | CAA | Q | CAA | + | + |  |
| *Ambrosiozyma vanderkliftii* | NRRL Y-63633 | yHMPu5000026145 | P56Q | CAA | Q | CAA | + | + |  |
| *Ambrosiozyma ambrosiae* | NRRL Y-7524 | yHMPu5000026137 | P56Q | CAA | Q | CAA | + | + |  |
| *Ogataea polymorpha* | NCYC 495 leu1.1 | hansenula polymorpha | P56Q | CAA | Q | CAA | + | + |  |
| *Ogataea saltuana* | NRRL Y-48448 | yHMPu5000041801 | P56Q | CAA | Q | CAA | + | N/A |  |
| *Ogataea thermomethanolica* | NRRL Y-27981 | yHMPu5000041800 | P56Q | CAA | Q | CAG | + | N/A |  |
| *Ogataea chonburiensis* | CBS 10363 | yHMPu5000038333 | P56Q | CAA | Q | CAG | + | N/A |  |
| *Candida rishiriensis* | NBRC 105027 | yHMPu5000038093 | P56Q | CAA | Q | CAA | + | N/A |  |
| *Ogataea paraovalis* | CBS 14697 | yHMPu5000037228 | P56Q | CAA | Q | CAA | + | N/A |  |
| *Ogataea haglerorum* | CBS 14645 | yHMPu5000037226 | P56Q | CAA | Q | CAA | + | N/A |  |
| *Komagataella mondaviorum* | CBS 15017 | yHMPu5000037220 | P56Q | CAG | Q | CAA | + | N/A |  |
| *Pichia nanzhaoensis* | CBS 15346 | yHMPu5000037203 | P56Q | CAA | Q | CAG | + | N/A |  |
| *Komagataella kurtzmanii* | NRRL Y-63667 | yHMPu5000035676 | P56Q | CAG | Q | CAA | + | N/A |  |
| *Ogataea nitratoaversa* | NRRL Y-48449 | yHMPu5000034636 | P56Q | CAA | Q | CAA | + | N/A |  |
| *Ogataea parapolymorpha* | NRRL YB-1982 | yHMPu5000026177 | P56Q | CAA | Q | CAA | + | N/A |  |
| *Candida phayaonensis* | NBRC 108868 | yHMPu5000038087 | P | CCA | Q | CAA | + | + | -  needs to be re-evaluated. Description is confusing |
| *Candida mattraenensis* | CBS 12097 | yHMPu5000038104 | P56Q | CAA | Q | CAA | - | - |  |
| *Ambrosiozyma pseudovanderkliftii* | NRRL Y-63632 | yHMPu5000035041 | P | CCT | Q | CAA | - | - |  |
| *Ambrosiozyma monospora* | NRRL Y-1484 | yHMPu5000026279 | P56Q | CAA | Q | CAA | - | - | - needs to be re-evaluated |
| *Komagataella phaffii* | NRRL Y-7556 | yHMPu5000034941 | P56Q | CAG | Q | CAA | - | + |  |
| *Candida maris* | NRRL Y-6696 | yHMPu5000034927 | P56Q | CAG | Q | CAG | - | + |  |
| *Candida piceae* | NRRL YB-2107 | yHMPu5000034915 | P56Q | CAA | Q | CAA | - | + |  |
| *Ogataea methylivora* | NRRL Y-17250 | yHMPu5000034901 | P56Q | CAA | Q | CAA | - | + |  |
| *Ogataea methylovora* | NRRL Y-11996 | yHMPu5000034639 | P56Q | CAA | Q | CAA | - | + |  |
| *Ogataea pini* | NRRL Y-11528 | yHMPu5000034891 | P56Q | CAA | Q | CAA | - | weak | -  needs to be re-evaluated |
| *Saturnispora sekii* | CBS 10931 | yHMPu5000040911 | P | CCT | Q | CAA | - | - |  |
| *Saturnispora sanitii* | CBS 10864 | yHMPu5000038325 | P | CCA | Q | CAA | - | - |  |
| *Saturnispora quitensis* | CBS 12184 | yHMPu5000038038 | P | CCA | Q | CAA | - | - |  |
| *Pichia cephalocereana* | NRRL Y-17225 | yHMPu5000037847 | P | CCA | Q | CAA | - | - |  |
| *Saturnispora kantuleensis* | CBS 15217 | yHMPu5000037214 | P | CCT | Q | CAA | - | - |  |
| *Pichia sporocuriosa* | NRRL Y-27347 | yHMPu5000035313 | P | CCA | Q | CAA | - | - |  |
| *Pichia eremophila* | NRRL Y-17224 | yHMPu5000034641 | P | CCA | Q | CAA | - | - |  |
| *Pichia deserticola* | NRRL Y-12918 | yHMPu5000034640 | P | CCA | Q | CAA | - | - |  |
| *Saturnispora hagleri* | NRRL Y-27828 | yHMPu5000034610 | P | CCA | Q | CAA | - | - |  |
| *Citeromyces matritensis* | NRRL Y-2407 | yHMPu5000026142 | P | CCA | Q | CAA | - | - |  |
| *Martiniozyma asiatica* | NRRL Y-63747 | yHMPu5000037881 | P | CCA | Q | CAA | - | + | Needs to be re-evaluated |
| *Brettanomyces nanus* | NRRL Y-17527 | yHMPu5000038399 | P56Q | CAG | Q | CAG | - | + |  |

*Amino acid in position 56 of ribosomal protein eL42 either a proline (P) or a glutamine (Q indicated as P56Q))

# Amino acid in position 38 of ribosomal protein uL15, a Glutamine or a substitution of leucine or methionine (indicated as Q38L or Q38M)

Species, where Westerdijk data needs to be re-evaluated, are indicated in green

Species where the genotype does not directly reflect the phenotype are indicated in yellow

Table 7 *Saccharomycetales*

| Species | Strain | Genome | eL42 | eL42 gene copy | Codon 56 | uL15 | Codon 38 | Cycl 0.1% | Cycl 0.01% |
| --- | --- | --- | --- | --- | --- | --- | --- | --- | --- |
| *Maudiozyma saulgeensis* | CBS 14374 | yHMPu5000037225 | P | 2 | CCT  CCT | Q38L | CTA | N/A | - |
| *Kazachstania humilis* | NRRL Y-7245 | yHMPu5000034721 | P | 2 | CCT  CCT | Q38L | CTG | N/A | + |
| *Kazachstania kunashirensis* | NRRL Y-27209 | yHAB160 | P | 2 | CCA  CCA | Q38L | CTA | N/A | - |
| *Kluyveromyces lactis* var. *lactis* | NRRL Y-8279 | yHMPu5000034712 | P56Q | 1 | CAA | Q38L | TTG | N/A | + |
| *Vanderwaltozyma yarrowii* | NRRL Y-17763 | yHMPu5000034868 | P | 1 | CCA | Q38L | TTA | N/A | +  Variable tolerance |
| *Kazachstania africana* | NRRL Y-8276 | yHAB137 | P | 2 | CCA  CCA | Q38L | TTA | N/A | +  Variable tolerance |
| *Grigorovia transvaalensis* | NRRL Y-17245 | yHAB154 | P | 1 | CCA | Q | CAA | N/A | - |
| *Zygosaccharomyces bailii* | CLIB 213 | *Zygosaccharomyces bailii* | P | 1 | CCT | Q | CAG | N/A | - |
| *Lachancea quebecensis* | CBS 14138 | yHMPu5000040963 | P | 1 | CCT | Q | CAG | N/A | - |
| *Zygosaccharomyces parabailii* | CBS 12809 | yHMPu5000037834 | P | 1 | CCT | Q | CAG | N/A | - |
| *Kazachstania jinghongensis* | CBS 15232 | yHMPu5000037210 | P | 2 | CCA  CCA | Q | CAA | N/A | - |
| *Nakaseomyces bacillisporus* | NRRL Y-17846 | yHMPu5000035666 | P | 1 | CCA | Q | CAA | N/A | - |
| *Torulaspora delbrueckii* | NRRL Y-866 | yHMPu5000035653 | P | 1 | CCT | Q | CAA | N/A | - |
| *Torulaspora microellipsoides* | NRRL Y-1549 | yHMPu5000035651 | P | 1 | CCT | Q | CAA | N/A | - |
| *Zygosaccharomyces pseudobailii* | CBS 2856 | yHMPu5000035627 | P | 1 | CCT | Q | CAG | N/A | - |
| *Torulaspora pretoriensis* | NRRL Y-17251 | yHMPu5000034881 | P | 1 | CCT | Q | CAA | N/A | - |
| *Tetrapisispora blattae* | NRRL Y-10934 | yHMPu5000034874 | P | 1 | CCT | Q | CAA | N/A | - |
| *Vanderwaltozyma polyspora* | NRRL Y-8283 | yHMPu5000034869 | P | 1 | CCA | Q | CAA | N/A | - |
| *Zygosaccharomyces bisporus* | NRRL Y-12626 | yHMPu5000034866 | P | 1 | CCT | Q | CAG | N/A | - |
| *Zygosaccharomyces lentus* | NRRL Y-27276 | yHMPu5000034864 | P | 1 | CCT | Q | CAG | N/A | - |
| *Zygosaccharomyces rouxii* | NRRL Y-229 | yHMPu5000034863 | P | 1 | CCT | Q | CAA | N/A | - |
| *Nakaseomyces castellii* | NRRL Y-17070 | yHMPu5000034724 | P | 1 | CCC | Q | CAG | N/A | - |
| *Nakaseomyces glabratus* | NRRL Y-65 | yHMPu5000034723 | P | 1 | CCT | Q | CAA | N/A | - |
| *Kluyveromyces aestuarii* | NRRL YB-4510 | yHMPu5000034709 | P | 1 | CCA | Q | CAA | N/A | - |
| *Lachancea kluyveri* | NRRL Y-12651 | yHMPu5000034694 | P | 1 | CCA | Q | CAA | N/A | - |
| *Lachancea nothofagi* | NRRL Y-48670 | yHMPu5000034690 | P | 1 | CCT | Q | CAA | N/A | - |
| *Lachancea thermotolerans* | NRRL Y-8284 | yHMPu5000034678 | P | 1 | CCT | Q | CAG | N/A | - |
| *Torulaspora franciscae* | NRRL Y-17532 | yHMPu5000026152 | P | 1 | CCA | Q | CAA | N/A | - |
| *Nakaseomyces delphensis* | NRRL Y-2379 | yHMPu5000026127 | P | 1 | CCT | Q | CAA | N/A | - |
| *Kazachstania sinensis* | NRRL Y-27222 | yHAB161 | P | 1 | CCT | Q | CAA | N/A | - |
| *Kazachstania viticola* | NRRL Y-27206 | yHAB158 | P | 2 | CCA  CCA | Q | CAA | N/A | - |
| *Kazachstania spencerorum* | NRRL Y-17920 | yHAB155 | P | 2 | CCA  CCA | Q | CAA | N/A | - |
| *Kazachstania martiniae* | NRRL Y-409 | yHAB132 | P | 2 | CCA  CCA | Q | N/A | N/A | - |
| *Kazachstania telluris* | NRRL Y-4302 | yHAB131 | P | 1 | CCA | Q | CAA | N/A | - |
| *Kazachstania pintolopesii* | NRRL Y-27500 | yHAB129 | P | 1 | CCA | Q | CAA | N/A | - |
| *Kazachstania heterogenica* | NRRL Y-27499 | yHAB128 | P | 1 | CCA | Q | CAA | N/A | - |
| *Saccharomyces uvarum* | JRY9189 | *Saccharomyces uvarum* | P | 2 | CCT  CCT | Q | CAA | N/A | - |
| *Saccharomyces paradoxus* | CBS 432 | *Saccharomyces paradoxus* | P | 2 | CCT  CCT | Q | CAA | N/A | - |
| *Kluyveromyces aestuarii* | ATCC 18862 | *Kluyveromyces aestuarii* | P | 1 | CCA  CCA | Q | CAA | N/A | - |
| *Kluyveromyces wickerhamii* | NRRL Y-8286 | yHMPu5000034699 | P56Q | 1 | CAA | Q38L | CTA | + | + |
| *Kluyveromyces lactis* var. *drosophilarum* | NRRL Y-8278 | yHMPu5000034711 | P56Q | 1 | CAA | Q38L | TTG | + | + |
| *Kluyveromyces dobzhanskii* | NRRL Y-1974 | yHMPu5000034710 | P56Q | 1 | CAA | Q38L | TTA | + | + |
| *Lachancea cidri* | NRRL Y-12634 | yHMPu5000034698 | P56Q | 1 | CAA | Q38L | CTT | + | + |
| *Kluyveromyces marxianus* | NRRL Y-8281 | yHMPu5000034713 | P56Q | 1 | CAA | Q38L 5 copies | TTG, TTG, TTG, TTG, TTG | + | + |
| *Zygotorulaspora chibaensis* | CBS 15364 | yHMPu5000037204 | P56Q | 1 | CAA | Q38F | TTC | + | + |
| *Zygotorulaspora florentina* | NRRL Y-1560 | yHMPu5000034862 | P56Q | 1 | CAA | Q38F | TTC | + | + |
| *Zygotorulaspora mrakii* | NRRL Y-12654 | yHMPu5000026256 | P56Q | 1 | CAA | Q38F | TTT | + | + |
| *Vanderwaltozyma verrucispora* | NRRL Y-63795 | yHMPu5000037837 | P56Q | 1 | CAA | Q38M | ATG | + | + |
| *Lachancea dasiensis* | CBS 10888 | yHMPu5000034697 | P56Q | 1 | CAA | Q | CAA | + | + |
| *Lachancea fermentati* | NRRL Y-1559 | yHMPu5000034695 | P56Q | 1 | CAA | Q | CAA | + | + |
| *Lachancea waltii* | NRRL Y-8285 | yHMPu5000026219 | P56Q | 1 | CAA | Q | CAA | + | + |
| *Kazachstania servazzii* | NRRL Y-12661 | yHAB151 | P56Q | 1 | CAA | Q | CAA | + | + |
| *Kazachstania siamensis* | NRRL Y-48842 | yHAB143 | P56Q | 1 | CAA | Q | CAA | + | + |
| *Kazachstania unispora* | NRRL Y-1556 | yHAB133 | P56Q | 1 | CAA | Q | CAA | + | + |
| *Naumovozyma dairenensis* | NRRL Y-1353 | yHMPu5000034872 | P | 2 | CCA | Q38M | ATG | - needs to be re-evaluated (variable tolerance) | N/A |
| *Eremothecium sinecaudum* | ATCC 58844 | *Eremothecium sinecaudum* | P56Q | 1 | CAA | Q38M | ATG | - needs to be re-evaluated | - |
| *Yueomyces sinensis* | NRRL Y-17406 | yHMPu5000035629 | P | 1 | CCA | Q38L | TTA | - Variable tolerance | - Variable tolerance |
| *Kazachstania exigua* | NRRL Y-12640 | yHAB150 | P | 2 | CCA  CCA | Q38L 2 copies | CTA  CTA | - | + |
| *Kazachstania bulderi* | NRRL Y-27203 | yHAB157 | P | 2 | CCA  CCT | Q38L | CTA | - | + |
| *Kazachstania piceae* | NRRL Y-17977 | yHAB156 | P | 2 | CCA  CCA | Q38L | TTG | - | + |
| *Kazachstania humilis* | NRRL Y-17074 | yHAB152 | P | 2 | CCT  CCT | Q38L | CTG | - | + |
| *Lachancea mirantina* | CBS 11717 | yHMPu5000034691 | P | 1 | CCT | Q38L | CTG | + Variable tolerance | N/A |
| *Naumovozyma castellii* | NRRL Y-12630 | yHMPu5000034871 | P | 2 | CCA  CCT | Q38L | TTG | - | + |
| *Torulaspora globosa* | NRRL Y-12650 | yHMPu5000034880 | P | 1 | CCA | Q38L | CTA | -  Delayed growth | N/A |
| *Zygotorulaspora danielsina* | CBS 15365 | yHMPu5000037205 | P56Q | 1 | CAA | Q38F | TTC | - | - needs to be re-evaluated |
| *Saccharomyces kudriavzevii* | IFO 1802 MATα hoΔ::natMX | saccharomyces kudriavzevii | P | 2 | CCT  CCT | Q | CAA | - | - |
| *Zygosaccharomyces pseudorouxii* | NRRL Y-63794 | yHMPu5000037836 | P | 1 | CCT | Q | CAA | - | - |
| *Tetrapisispora pingtungensis* | CBS 12780 | yHMPu5000035656 | P | 1 | CCA | Q | CAA | - | - |
| *Tetrapisispora taiwanensis* | CBS 10586 | yHMPu5000035655 | P | 1 | CCA | Q | CAA | - | - |
| *Tetrapisispora iriomotensis* | NRRL Y-27309 | yHMPu5000034876 | P | 1 | CCA | Q | CAA | - | - |
| *Zygosaccharomyces kombuchaensis* | NRRL YB-4811 | yHMPu5000034865 | P | 1 | CCT | Q | CAG | - | - |
| *Nakaseomyces kungkrabaensis* | CBS 10927 | yHMPu5000034722 | P | 1 | CCT | Q | CAA | - | - |
| *Nakaseomyces uthaithaninus* | CBS 10932 | yHMPu5000034718 | P | 1 | CCT | Q | CAA | - | - |
| *Kluyveromyces nonfermentans* | NRRL Y-27343 | yHMPu5000034701 | P | 1 | CCA | Q | CAA | - | - |
| *Kluyveromyces siamensis* | CBS 10860 | yHMPu5000034700 | P | 1 | CCA | Q | CAA | - | - |
| *Lachancea lanzarotensis* | CBS 12615 | yHMPu5000034693 | P | 1 | CCT | Q | CAG | - | - |
| *Lachancea meyersii* | NRRL Y-27269 | yHMPu5000034692 | P | 1 | CCT | Q | CAG | - | - |
| *Tetrapisispora phaffii* | NRRL Y-8282 | yHMPu5000034580 | P | 1 | CCA | Q | CAA | - | - |
| *Zygosaccharomyces sapae* | CBS 12607 | yHDO603 | P | 2 | CCT  CCT | Q | CAA | - | - |
| *Grigorovia humatica* | NRRL Y-48839 | yHDO586 | P | 1 | CCA | Q | CAA | - | - |
| *Zygosaccharomyces mellis* | NRRL Y-12628 | yHDO572 | P | 1 | CCT | Q | CAA | - | - |
| *Grigorovia yakushimaensis* | NRRL Y-48837 | yHAB166 | P | 1 | CCA | Q | CAA | - | - |
| *Grigorovia jiainica* | NRRL Y-48843 | yHAB144 | P | 1 | CCA | Q | CAA | - | - |
| *Kazachstania bromeliacearum* | NRRL Y-48836 | yHAB136 | P | 2 | CCA  CCA | Q | CAA | - | - |
| *Kazachstania bovina* | NRRL Y-7283 | yHAB127 | P | 1 | CCA | Q | CAA | - | - |
| *Saccharomyces mikatae* | IFO 1815 | *saccharomyces mikatae* | P | 2 | CCT  CCT | Q | CAA | - | - |
| *Saccharomyces jurei* | CBS 14759T | *saccharomyces jurei* | P | 2 | CCT  CCT | Q | CAA | - | - |
| *Kazachstania naganishii* | NRRL Y-48838 | *kazachstania naganishii* | P | 1 | CCT  CCT | Q | CAA | - | - |
| *Tetrapisispora fleetii* | NRRL Y-27350 | yHMPu5000034875 | P | 1 | CCA | Q | CAA | - | + |
| *Tetrapisispora nanseiensis* | NRRL Y-27310 | yHMPu5000034878 | P | 1 | CCA | Q | CAA | - | + |
| *Tetrapisispora arboricola* | NRRL Y-27308 | yHMPu5000034873 | P | 1 | CCA | Q | CAA | - | N/A |
| *Vanderwaltozyma tropicalis* | CBS 11575 | yHMPu5000026257 | P | 1 | CCA | Q | CAA | - | N/A |

*Amino acid in position 56 of ribosomal protein eL42 either a proline (P) or a glutamine (Q indicated as P56Q))

# Amino acid in position 38 of ribosomal protein uL15, a Glutamine or a substitution of phenyalanine, leucine or methionine (indicated as Q38F, Q38L or Q38M)

Species, where Westerdijk data needs to be re-evaluated, are indicated in green

Species where the genotype does not directly reflect the phenotype are indicated in yellow

Table 8 *Saccharomycodales*

| Species | Strain | Genome | eL42* | Codon 56 | uL15# | Codon 38 | Cycl 0.1% | Cycl 0.01% |
| --- | --- | --- | --- | --- | --- | --- | --- | --- |
| *Hanseniaspora thailandica* | ZIM 2325 | yHMPu5000035697 | P56Q | CAA | Q | CAA | N/A | - |
| *Hanseniaspora singularis* | NRRL Y-63757 | yHMPu5000035696 | P56Q | CAA | Q | CAA | N/A | - |
| *Hanseniaspora mollemarum* | CBS 15034 | yHMPu5000037217 | P56Q | CAA | Q | CAA | N/A | + |
| *Hanseniaspora occidentalis* var. *citrica* | CBS 6783 | yHMPu5000035694 | P | CCA | Q | CAA | N/A | - |
| *Hanseniaspora occidentalis* var. *occidentalis* | NRRL Y-7946 | yHMPu5000034959 | P | CCA | Q | CAA | N/A | - |
| *Hanseniaspora osmophila* | NRRL Y-1613 | yHMPu5000034957 | P | CCG | Q | CAA | N/A | - |
| *Saccharomycodes ludwigii* | NRRL Y-12793 | yHMPu5000026282 | P | CCA | Q | CAA | N/A | - |
| *Hanseniaspora vineae* | NRRL Y-17529 | yHMPu5000026147 | P | CCG | Q | CAA | N/A | - |
| *Hanseniaspora taiwanica* | yHDO590 | yHDO590 | P | CCA | Q | CAA | N/A | - |
| *Hanseniaspora clermontiae* | NRRL Y-27515 | yHMPu5000034963 | P56Q | CAA | Q | CAA | + | + |
| *Hanseniaspora guilliermondii* | NRRL Y-1625 | yHMPu5000034962 | P56Q | CAA | Q | CAA | + | + |
| *Hanseniaspora lachancei* | NRRL Y-27514 | yHMPu5000034961 | P56Q | CAA | Q | CAA | + | + |
| *Hanseniaspora uvarum* | NRRL Y-1614 | yHMPu5000034956 | P56Q | CAA | Q | CAA | + | + |
| *Hanseniaspora valbyensis* | NRRL Y-1626 | yHMPu5000034955 | P56Q | CAA | Q | CAA | + | + |
| *Hanseniaspora lindneri* | NRRL Y-17531 | yHMPu5000034663 | P56Q | CAA | Q | CAA | + | + |
| *Hanseniaspora pseudoguilliermondii* | CBS 8772 | yHMPu5000035695 | P56Q | CAA | Q | CAA | + | N/A |
| *Hanseniaspora nectarophila* | CBS 13383 | yHMPu5000035693 | P56Q | CAA | Q | CAA | + | N/A |

*Amino acid in position 56 of ribosomal protein eL42 is either a proline (P) or a glutamine (Q indicated as P56Q)

# Amino acid in position 38 of ribosomal protein uL15, is in all cases a Glutamine

Species where the genotype does not directly reflect the phenotype are indicated in yellow

Table 9 *Serinales*

| Species | Strain | Genome | eL 42 | eL42 gene copy | Codon 56 | uL15 | Codon 38 | Cycl 0.1% | Cycl 0.01% |
| --- | --- | --- | --- | --- | --- | --- | --- | --- | --- |
| *Australozyma picinguabensis* | NRRL Y-27814 | yHMPu5000041846 | P | 1 | CCA | Q38L | TTG | N/A | - needs to be re-evaluated |
| *Candida saopauloensis* | NRRL Y-27815 | yHMPu5000041842 | P | 1 | CCA | Q38L | TTG | N/A | - Needs to be reanalysed |
| *Candida silvanorum* | NRRL Y-7782 | yHMPu5000035333 | P | 1 | CCA | Q38L | TTG | N/A | - slow  Needs to be reanalysed |
| *Candida palmyrensis* | CBS 11546 | yHMPu5000038086 | P | 1 | CCC | Q38F | TTC | N/A | + |
| *Candida golubevii* | NRRL Y-48707 | yHMPu5000041862 | P56Q/P56P | 1,1 | CAG  CCA | Q | CAA | N/A | - |
| *Metschnikowia krissii* | NRRL Y-5389 | yHMPu5000041811 | P | 1 | CCC | Q | CAG | N/A | - |
| *Metschnikowia pulcherrima* | NRRL Y-7111 | yHMPu5000041732 | P56Q/P56P | 1,2 | CAG  CCC  CCC | Q | CAG | N/A | - |
| *Metschnikowia henanensis* | CBS 12677 | yHMPu5000038328 | P56Q/P56P | 1,1 | CAG  CCA | Q | CAG | N/A | - |
| *Metschnikowia kofuensis* | NRRL Y-27226 | yHMPu5000037898 | P56Q/P56P | 1,1 | CAA  CCA | Q | CAA | N/A | - |
| *Metschnikowia reukaufii* | NRRL Y-7112 | yHMPu5000037865 | P56Q/P56P | 1,1 | CAA  CCA | Q | CAA | N/A | - |
| *Kodamaea mesenterica* | NRRL Y-1494 | yHMPu5000034650 | P56Q/P56P | 1,1 | CAG  CCA | Q | CAA | N/A | - |
| *Yamadazyma mexicana* | NRRL Y-11818 | yHMPu5000038314 | P | 1 | CCA | Q | CAA | N/A | - |
| *Clavispora fructus* | NRRL Y-17088 | yHMPu5000041848 | P | 1 | CCA | Q | CAA | N/A | - |
| *Debaryomyces coudertii* | NRRL Y-7425 | yHMPu5000041841 | P | 1 | CCA | Q | CAA | N/A | - |
| *Metschnikowia torresii* | NRRL Y-6699 | yHMPu5000041839 | P | 1 | CCA | Q | CAA | N/A | - |
| *Yamadazyma tenuis* | NRRL Y-1498 | yHMPu5000041836 | P | 1 | CCT | Q | CAA | N/A | - |
| *Candida sophiae-reginae* | NRRL Y-17668 | yHMPu5000041832 | P | 1 | CCA | Q | CAA | N/A | - |
| *Debaryomyces robertsiae* | NRRL Y-6670 | yHMPu5000041825 | P | 1 | CCT | Q | CAA | N/A | - |
| *Metschnikowia caudata* | NRRL Y-63722 | yHMPu5000041808 | P | 1 | CCC | Q | CAA | N/A | - |
| *Metschnikowia bicuspidata* var. *chathamia* | NRRL Y-17917 | yHMPu5000041807 | P | 1 | CCA | Q | CAA | N/A | - |
| *Metschnikowia agaves* | NRRL Y-17915 | yHMPu5000041806 | P | 1 | CCA | Q | CAA | N/A | - |
| *Schwanniomyces etchellsii* | NRRL Y-7121 | yHMPu5000041793 | P | 1 | CCA | Q | CAA | N/A | - |
| *Debaryomyces prosopidis* | NRRL Y-27369 | yHMPu5000041678 | P | 1 | CCA | Q | CAA | N/A | - |
| *Metschnikowia bowlesiae* | NRRL Y-63671 | yHMPu5000040955 | P | 1 | CCT | Q | CAA | N/A | - |
| *Candida ipomoeae* | NRRL Y-27455 | yHMPu5000040951 | P | 1 | CCC | Q | CAA | N/A | - |
| *Metschnikowia gruessii* | NRRL Y-17809 | yHMPu5000040947 | P | 1 | CCA | Q | CAA | N/A | - |
| *Metschnikowia continentalis* | NRRL Y-27449 | yHMPu5000040943 | P | 1 | CCC | Q | CAA | N/A | - |
| *Metschnikowia proteae* | NRRL Y-48784 | yHMPu5000040937 | P | 1 | CCA | Q | CAA | N/A | - |
| *Metschnikowia shivogae* | NRRL Y-27924T | yHMPu5000040935 | P | 1 | CCA | Q | CAA | N/A | - |
| *Candida diddensiae* | NRRL Y-7589 | yHMPu5000040933 | P | 1 | CCA | Q | CAA | N/A | - |
| *Hemisphaericaspora insectamans* | NRRL Y-7786 | yHMPu5000040918 | P | 1 | CCA | Q | CAA | N/A | - |
| *Kodamaea alishanica* | CBS 11429 | yHMPu5000038400 | P | 1 | CCA | Q | CAA | N/A | - |
| *Kodamaea lidongshanica* | CBS 11426 | yHMPu5000038379 | P | 1 | CCA | Q | CAA | N/A | - |
| *Candida verbasci* | CBS 12699 | yHMPu5000038360 | P | 1 | CCA | Q | CAA | N/A | - |
| *Candida smagusa* | CBS 11430 | yHMPu5000038353 | P | 1 | CCA | Q | CAA | N/A | - |
| *Scheffersomyces gosingicus* | CBS 11433 | yHMPu5000038324 | P | 1 | CCT | Q | CAA | N/A | - |
| *Teunomyces funiuensis* | CBS 13911 | yHMPu5000038320 | P | 1 | CCA | Q | CAA | N/A | - |
| *Kodamaea kaohsiungensis* | CBS 11435 | yHMPu5000038109 | P | 1 | CCA | Q | CAA | N/A | - |
| *Candida melibiosica* | NRRL Y-17076 | yHMPu5000038103 | P | 1 | CCC | Q | CAG | N/A | - |
| *Candida pseudoaaseri* | CBS 11170 | yHMPu5000038089 | P | 1 | CCA | Q | CAA | N/A | - |
| *Kodamaea suecica* | NRRL Y-12943 | yHMPu5000038082 | P | 1 | CCA | Q | CAA | N/A | - |
| *Candida tallmaniae* | CBS 8575 | yHMPu5000038080 | P | 1 | CCA | Q | CAA | N/A | - |
| *Candida vaughaniae* | CBS 8583 | yHMPu5000038074 | P | 1 | CCA | Q | CAA | N/A | - |
| *Hyphopichia pseudoburtonii* | CBS 2455 | yHMPu5000038061 | P | 1 | CCA | Q | CAA | N/A | - |
| *Kodamaea kakaduensis* | CBS 8611 | yHMPu5000038060 | P | 1 | CCC | Q | CAG | N/A | - |
| *Yamadazyma akitaensis* | NRRL Y-7904 | yHMPu5000038037 | P | 1 | CCA | Q | CAA | N/A | - |
| *Yamadazyma dushanensis* | CBS 13914 | yHMPu5000038036 | P | 1 | CCA | Q | CAA | N/A | - |
| *Yamadazyma olivae* | CBS 11171 | yHMPu5000038031 | P | 1 | CCA | Q | CAA | N/A | - |
| *Candida conglobata* | NRRL Y-1504 | yHMPu5000037914 | P | 1 | CCA | Q | CAA | N/A | - |
| *Candida dendronema* | NRRL Y-7781 | yHMPu5000037912 | P | 1 | CCA | Q | CAA | N/A | - |
| *Candida multigemmis* | NRRL Y-17659 | yHMPu5000037903 | P | 1 | CCA | Q | CAA | N/A | - |
| *Candida membranifaciens* | NRRL Y-2089 | yHMPu5000037901 | P | 1 | CCA | Q | CAA | N/A | - |
| *Diutina rugosa* | NRRL Y-1496 | yHMPu5000037887 | P | 1 | CCC | Q | CAA | N/A | - |
| *Candida trypodendri* | NRRL Y-6488 | yHMPu5000037871 | P | 1 | CCA | Q | CAA | N/A | - |
| *Metschnikowia australis* | NRRL Y-17414 | yHMPu5000037869 | P | 1 | CCA | Q | CAA | N/A | - |
| *Metschnikowia bicuspidata* var. *californica* | NRRL Y-17916 | yHMPu5000037868 | P | 1 | CCA | Q | CAA | N/A | - |
| *Nematodospora anomalae* | CBS 13927 | yHMPu5000037253 | P | 1 | CCT | Q | CAA | N/A | - |
| *Nematodospora valgi* | CBS 12562 | yHMPu5000037248 | P | 1 | CCA | Q38A | GCT | N/A | - |
| *Suhomyces coccinellae* | CBS 14298 | yHMPu5000037234 | P | 1 | CCA | Q | CAA | N/A | - |
| *Candida vulturna* | CBS 14366 | yHMPu5000037224 | P | 1 | CCC | Q | CAG | N/A | - |
| *Suhomyces faveliae* | CBS 14299 | yHMPu5000037222 | P | 1 | CCA | Q | CAA | N/A | - |
| *Metschnikowia baotianmanensis* | CBS 15869 | yHMPu5000037208 | P | 1 | CCA | Q | CAA | N/A | - |
| *Candida mogii* | NRRL Y-17032 | yHMPu5000035706 | P | 1 | CCA | Q | CAG | N/A | - |
| *Hyphopichia burtonii* | NRRL Y-1933 | yHMPu5000035682 | P | 1 | CCA | Q | CAA | N/A | - |
| *Hyphopichia gotoi* | NRRL Y-27225 | yHMPu5000035681 | P | 1 | CCA | Q | CAA | N/A | - |
| *Hyphopichia rhagii* | NRRL Y-2594 | yHMPu5000035679 | P | 1 | CCA | Q | CAA | N/A | - |
| *Priceomyces haplophilus* | NRRL Y-7860 | yHMPu5000035660 | P | 1 | CCA | Q | CAA | N/A | - |
| *Yamadazyma triangularis* | NRRL Y-5714 | yHMPu5000035642 | P | 2 | CCT  CCT | Q | CAA | N/A | - |
| *Yamadazyma scolyti* | NRRL Y-5512 | yHMPu5000035641 | P | 1 | CCA | Q | CAA | N/A | - |
| *Yamadazyma philogaea* | NRRL Y-7813 | yHMPu5000035640 | P | 1 | CCT | Q | CAA | N/A | - |
| *Clavispora opuntiae* | NRRL Y-11820 | yHMPu5000035334 | P | 1 | CCA | Q | CAA | N/A | - |
| *Hyphopichia heimii* | NRRL Y-7502 | yHMPu5000035318 | P | 1 | CCA | Q | CAA | N/A | - |
| *Hyphopichia fennica* | NRRL Y-7505 | yHMPu5000035317 | P | 1 | CCA | Q | CAA | N/A | - |
| *Millerozyma farinosa* | NRRL Y-7553 | yHMPu5000035307 | P | 1 | CCA | Q | CAG | N/A | - |
| *Kurtzmaniella fragi* | NRRL Y-17910 | yHMPu5000035302 | P | 1 | CCA | Q | CAA | N/A | - |
| *Priceomyces castillae* | NRRL Y-7501 | yHMPu5000035297 | P | 1 | CCA | Q | CAA | N/A | - |
| *Priceomyces carsonii* | NRRL YB-4275 | yHMPu5000035296 | P | 1 | CCT | Q | CAA | N/A | - |
| *Priceomyces melissophilus* | NRRL Y-7585 | yHMPu5000035295 | P | 1 | CCT | Q | CAA | N/A | - |
| *Yamadazyma nakazawae* | NRRL Y-7903 | yHMPu5000035252 | P | 1 | CCA | Q | CAA | N/A | - |
| *Candida aaseri* | NRRL YB-3897 | yHMPu5000035251 | P | 1 | CCA | Q | CAA | N/A | - |
| *Candida atlantica* | NRRL Y-17759 | yHMPu5000035250 | P | 1 | CCA | Q | CAA | N/A | - |
| *Candida atmosphaerica* | NRRL Y-17642 | yHMPu5000035249 | P | 1 | CCA | Q | CAA | N/A | - |
| *Candida germanica* | NRRL Y-27064 | yHMPu5000035247 | P | 1 | CCA | Q | CAA | N/A | - |
| *Babjeviella inositovora* | NRRL Y-12698 | yHMPu5000035043 | P | 1 | CCA | Q | CAG | N/A | - |
| *Suhomyces pyralidae* | NRRL Y-27085 | yHMPu5000035011 | P | 1 | CCA | Q | CAA | N/A | - |
| *Suhomyces xylopsoci* | NRRL Y-27066 | yHMPu5000035006 | P | 1 | CCA | Q | CAA | N/A | - |
| *Clavispora fructus* | NRRL Y-17072 | yHMPu5000034988 | P | 1 | CCA | Q | CAA | N/A | - |
| *Candida oregonensis* | NRRL Y-5850 | yHMPu5000034986 | P | 1 | CCA | Q | CAG | N/A | - |
| *Kodamaea anthophila* | NRRL Y-27355 | yHMPu5000034664 | P | 1 | CCA | Q | CAG | N/A | - |
| *Clavispora lusitaniae* | NRRL Y-11827 | yHMPu5000034658 | P | 1 | CCA | Q | CAA | N/A | - |
| *Candida pseudoglaebosa* | NRRL Y-17911 | yHMPu5000034657 | P | 1 | CCA | Q | CAA | N/A | - |
| *Kodamaea restingae* | NRRL Y-27358 | yHMPu5000034648 | P | 1 | CCA | Q | CAG | N/A | - |
| *Metschnikowia bicuspidata* var. *bicuspidata* | NRRL YB-4993 | yHMPu5000034592 | P | 1 | CCA | Q | CAA | N/A | - |
| *Kodamaea nitidulidarum* | NRRL Y-27353 | yHMPu5000026273 | P | 1 | CCA | Q | CAG | N/A | - |
| *Candida buinensis* | NRRL Y-11706 | yHMPu5000026052 | P | 1 | CCA | Q | CAA | N/A | - |
| *Spathaspora arborariae* | UFMG-HM19.1AT | spathaspora_arborariae | P | 2 | CCA  CCA | Q (2) | CAA  CAA | N/A | - |
| *Candida ascalaphidarum* | NRRL Y-27908 | yHMPu5000041855 | P | 1 | CCT | Q | CAG | N/A | + |
| *Metschnikowia laotica* | CBS 12961 | yHMPu5000038330 | P | 1 | CCA | Q | CAA | N/A | + |
| *Debaryomyces udenii* | NRRL Y-17354 | yHMPu5000037873 | P | 1 | CCA | Q | CAA | N/A | + |
| *Meyerozyma caribbica* | NRRL Y-27274 | yHMPu5000035662 | P | 1 | CCC | Q | CAA | N/A | + |
| *Candida chilensis* | NRRL Y-17141 | yHMPu5000035720 | P56Q | 1 | CAA | Q38M | ATG | + | + |
| *Candida touchengensis* | CBS 10585 | yHMPu5000038359 | P | 1 | CCA | Q38L | TTG | + | + |
| ****Candida fluviatilis* | NRRL Y-7711 | yHMPu5000035327 | P56Q | 1 | CAA | Q38L | CTC | + | + |
| *Teunomyces stri* | NRRL Y-48063 | yHMPu5000038318 | P56Q/P56P | 1,1 | CAA  CCA | Q | CAA | + | + |
| *Teunomyces atbi* | NRRL Y-27651 | yHMPu5000035035 | P56Q/P56P | 1,1 | CAA  CCA | Q | CAA | + | + |
| *Teunomyces barrocoloradensis* | NRRL Y-27934 | yHMPu5000035034 | P56Q/P56P | 1,1 | CAG  CCA | Q | CAA | + | + |
| *Teunomyces cretensis* | NRRL Y-27777 | yHMPu5000035033 | P56Q/P56P | 1,1 | CAA  CCA | Q | CAA | + | + |
| *Candida sojae* | NRRL Y-17909 | yHMPu5000034996 | P56Q/P56Q/ P56P | 2,1 | CAA  CAG  CCA | Q | CAA | + | + |
| *Candida maltosa* | NRRL Y-17677 | yHMPu5000034992 | P56Q/ P56Q/ P56Q/P56Q/ P56P | 4,1 | CAA  CAA  CAA  CAA  CCA | Q | CAA | + | + |
| *Candida sanyaensis* | CBS 12637 | yHMPu5000038350 | P56Q/P56P | 2,1 | CAG  CAA  CCA | Q | CAA | + | N/A |
| *Kodamaea jinghongensis* | CBS 14700 | yHMPu5000037230 | P56Q/P56P | 1,1 | CAG  CCT | Q | CAA | + | N/A |
| *Candida nonsorbophila* | CBS 10862 | yHMPu5000038099 | P56Q | 1 | CAA | Q | CAA | + | + |
| *Scheffersomyces illinoinensis* | NRRL Y-48827 | yHMPu5000037853 | P56Q | 1 | CAA | Q | CAA | + | + |
| *Candida albicans* | NRRL Y-12983 | yHMPu5000035004 | P56Q | 1 | CAA | Q | CAA | + | + |
| *Aciculoconidium aculeatum* | NRRL YB-4298 | yHMPu5000034654 | P56Q | 1 | CAA | Q | CAA | + | + |
| *Candida tammaniensis* | NRRL Y-8257 | yHMPu5000041833 | P56Q | 1 | CAA | Q | CAA | + | + |
| *Schwanniomyces occidentalis* var. *persoonii* | NRRL Y-7400 | yHMPu5000041781 | P56Q | 1 | CAA | Q | CAA | + | + |
| *Schwanniomyces polymorphus* var. *polymorphus* | NRRL Y-2022 | yHMPu5000041780 | P56Q | 1 | CAA | Q | CAA | + | + |
| *Schwanniomyces pseudopolymorphus* | NRRL YB-4229 | yHMPu5000041779 | P56Q | 1 | CAA | Q | CAA | + | + |
| *Schwanniomyces vanrijiae* var. *yarrowii* | NRRL Y-11714 | yHMPu5000041778 | P56Q | 1 | CAA | Q | CAA | + | + |
| *Schwanniomyces polymorphus* var. *africanus* | CBS 6741 | yHMPu5000038322 | P56Q | 1 | CAA | Q | CAA | + | + |
| *Yamadazyma tumulicola* | NBRC 104392 | yHMPu5000038076 | P56Q | 1 | CAA | Q | CAA | + | + |
| *Yamadazyma insecticola* | CBS 13382 | yHMPu5000038033 | P56Q | 1 | CAA | Q | CAA | + | + |
| *Limtongozyma cylindracea* | NRRL Y-17506 | yHMPu5000037913 | P56Q | 1 | CAG | Q | CAG | + | + |
| *Metschnikowia zobellii* | NRRL Y-5387 | yHMPu5000037863 | P56Q | 1 | CAG | Q | CAG | + | + |
| *Schwanniomyces vanrijiae* var. *vanrijiae* | NRRL Y-7535 | yHMPu5000037844 | P56Q | 1 | CAA | Q | CAA | + | + |
| *Schwanniomyces yamadae* | NRRL Y-48658 | yHMPu5000037843 | P56Q | 1 | CAA | Q | CAA | + | + |
| *Candida entomophila* | NRRL Y-7783 | yHMPu5000035330 | P56Q | 1 | CAA | Q | CAA | + | + |
| *Hyphopichia homilentoma* | NRRL Y-10941 | yHMPu5000035316 | P56Q | 1 | CAA | Q | CAA | + | + |
| *Teunomyces gatunensis* | NRRL Y-48064 | yHMPu5000035032 | P56Q/P56P | 1,1 | CAG  CCA | Q | CAA | + | + |
| *Suhomyces choctaworum* | NRRL Y-27584 | yHMPu5000035021 | P56Q | 1 | CAA | Q | CAA | + | + |
| *Candida buenavistaensis* | NRRL Y-27734 | yHMPu5000035002 | P56Q | 1 | CAA | Q | CAA | + | + |
| *Candida dubliniensis* | NRRL Y-17841 | yHMPu5000034991 | P56Q | 1 | CAA | Q | CAA | + | + |
| *Danielozyma ontarioensis* | NRRL YB-1246 | yHMPu5000034973 | P56Q | 1 | CAA | Q | CAA | + | + |
| *Priceomyces medius* | NRRL Y-7122 | yHMPu5000034606 | P56Q | 1 | CAA | Q | CAA | + | + |
| *Schwanniomyces occidentalis* var. *occidentalis* | NRRL Y-10 | yHMPu5000034581 | P56Q | 1 | CAA | Q | CAA | + | + |
| *Wickerhamia fluorescens* | NRRL YB-4819 | yHMPu5000034579 | P56Q | 1 | CAG | Q | CAA | + | + |
| *Scheffersomyces titanus*  *(Scheffersomyces titani)* | CBS 13926 | yHMPu5000037292 | P56Q | 1 | CAA | Q | CAA | + | N/A |
| *Candida pseudoviswanathii* | CBS 13916 | yHMPu5000037250 | P56Q/ P56Q/P56P | 2,1 | CAA  CAG  CCA | Q | CAA | + | N/A |
| *Schwanniomyces capriottii* | NRRL Y-7423 | yHMPu5000041792 | P56Q | 1 | CAA | Q | CAA | + | + |
| *Scheffersomyces ergatensis* | NRRL Y-17652 | yHMPu5000041789 | P | 1 | CCA | Q | CAA | + | + |
| *Scheffersomyces coipomensis* | NRRL Y-17651 | yHMPu5000041788 | P | 1 | CCA | Q | CAA | + | + |
| *Kurtzmaniella oleophila* | NRRL Y-2317 | yHMPu5000038372 | P | 1 | CCA | Q | CAA | + | + |
| *Candida pseudoflosculorum* | CBS 8584 | yHMPu5000038368 | P | 1 | CCA | Q | CAA | + | + |
| *Scheffersomyces lignicola* | CBS 10612 | yHMPu5000038323 | P | 1 | CCA | Q | CAA | + | + |
| *Candida haemuli* | NRRL Y-6693 | yHMPu5000038120 | P | 1 | CCC | Q | CAG | + | + |
| *Candida anutae* | NRRL Y-27374 | yHMPu5000038114 | P | 1 | CCC | Q | CAG | + | + |
| *Scheffersomyces lignosus* | NRRL Y-12856 | yHMPu5000038106 | P | 1 | CCA | Q | CAA | + | + |
| *Teunomyces aglyptinius* | NRRL Y-27935 | yHMPu5000037925 | P | 1 | CCA | Q | CAA | + | + |
| *Diutina catenulata* | NRRL Y-1508 | yHMPu5000037915 | P | 1 | CCT | Q | CAG | + | + |
| *Scheffersomyces quercinus* | NRRL Y-48825 | yHMPu5000037856 | P | 1 | CCA | Q | CAA | + | + |
| *Scheffersomyces insectosa* | NRRL Y-12854 | yHMPu5000037854 | P | 1 | CCA | Q | CAA | + | + |
| *Scheffersomyces virginianus* | NRRL Y-48822 | yHMPu5000037845 | P | 1 | CCA | Q | CAA | + | + |
| *Candida xiaguanensis* | CBS 13923 | yHMPu5000037251 | P | 1 | CCA | Q | CAA | + | + |
| *Meyerozyma carpophila* | NRRL Y-17905 | yHMPu5000035664 | P | 1 | CCC | Q | CAA | + | + |
| *Meyerozyma guilliermondii* | NRRL Y-2075 | yHMPu5000035663 | P | 1 | CCC | Q | CAA | + | + |
| *Candida santamariae* | NRRL Y-6656 | yHMPu5000035304 | P | 1 | CCA | Q | CAA | + | + |
| *Priceomyces fermenticarens* | NRRL Y-17321 | yHMPu5000035294 | P | 1 | CCT | Q | CAA | + | + |
| *Teunomyces kruisii* | NRRL Y-17087 | yHMPu5000035031 | P | 1 | CCA | Q | CAA | + | + |
| *Lodderomyces elongisporus* | NRRL YB-4239 | yHMPu5000035005 | P | 1 | CCA | Q | CAA | + | + |
| *Candida duobushaemuli* | NRRL Y-17802 | yHMPu5000034989 | P | 1 | CCC | Q | CAG | + | + |
| *Candida savonica* | NRRL Y-17077 | yHMPu5000034647 | P | 1 | CCT | Q | CAG | + | + |
| *Candida boleticola* | NRRL Y-17080 | yHMPu5000034645 | P | 1 | CCA | Q | CAA | + | + |
| *Candida schatavii* | NRRL Y-17078 | yHMPu5000034643 | P | 1 | CCA | Q | CAA | + | + |
| *Candida zeylanoides* | NRRL Y-1774 | yHMPu5000034642 | P | 1 | CCC | Q | CAA | + | + |
| *Meyerozyma smithsonii* | NRRL Y-27642 | yHMPu5000034633 | P | 1 | CCA | Q | CAA | + | + |
| *Meyerozyma athensensis* | NRRL Y-27644 | yHMPu5000034632 | P | 1 | CCC | Q | CAA | + | + |
| *Candida railenensis* | NRRL Y-17762 | yHMPu5000026056 | P | 1 | CCA | Q | CAA | + | + |
| *Meyerozyma guilliermondii* | NRRL Y-324 | meyerozyma_guilliermondii | P | 1 | #N/A | Q | #N/A | + | + |
| *Candida tsuchiyae* | NRRL Y-17840 | yHMPu5000034983 | P | 1 | CCA | Q | CAG | + | + |
| *Kodamaea hsintzibuensis* | CBS 11427 | yHMPu5000040930 | P | 1 | CCA | Q38M | ATG | - | + |
| *Kodamaea neixiangensis* | CBS 14699 | yHMPu5000037229 | P | 1 | CCA | Q38M | ATG | - | + |
| *Australozyma robnettiae* | CBS 8580 | yHMPu5000040925 | P | 1 | CCA | Q38L | TTG | - | - |
| *Metschnikowia saccharicola* | CBS 12575 | yHMPu5000038332 | P | 1 | CCA | Q38L | TTG | - | + |
| *Australozyma nongkhaiensis* | CBS 11724 | yHMPu5000038373 | P | 1 | CCA | Q38L | TTG | - | N/A |
| *Hermanozyma ubatubensis* | NRRL Y-27812 | yHMPu5000034982 | P | 1 | CCT | Q38L | CTC | - | - |
| *Candida lessepsii* | NRRL Y-27766 | yHMPu5000040921 | P | 1 | CCA | Q38F | TTC | - | + |
| *Metschnikowia noctiluminum* | NRRL Y-27753 | yHMPu5000041814 | P56Q/P56P | 1,1 | CAA  CCA | Q | CAA | - | - |
| *Metschnikowia koreensis* | CBS 8854 | yHMPu5000038329 | P56Q/P56P | 1,1 | CAA  CCA | Q | CAG | - | - |
| *Metschnikowia corniflorae* | NRRL Y-27750 | yHMPu5000035305 | P56Q/P56P | 1,1 | CAA  CCA | Q | CAG | - | - |
| *Kodamaea derodonti* | NRRL Y-27711 | yHMPu5000034652 | P56Q/P56P | 1,1 | CAA  CCA | Q | CAA | - | - |
| *Kodamaea arcana* | NRRL Y-27712 | yHMPu5000035315 | P56Q/P56P | 1,1 | CCA  CAA | Q | CAA | - | slow |
| *Candida tropicalis* | NRRL Y-12968 | yHMPu5000034997 | P56Q/P56Q/P56P | 2,1 | CAA  CAA  CCA | Q | CAA | - | N/A |
| *Candida khao-thaluensis* | CBS 8535 | yHMPu5000038108 | P56Q | 1 | CCT | Q | CAA | - | N/A |
| *Candida gorgasii* | NRRL Y-27707 | yHMPu5000041863 | P | 1 | CCA | Q | CAA | - | - |
| *Candida friedrichii* | NRRL Y-17653 | yHMPu5000041859 | P | 1 | CCA | Q | CAA | - | - |
| *Candida endomychidarum* | NRRL Y-27708 | yHMPu5000041858 | P | 1 | CCA | Q | CAA | - | - |
| *Metschnikowia chrysomelidarum* | NRRL Y-27749 | yHMPu5000041857 | P | 1 | CCC | Q | CAG | - | - |
| *Candida lyxosophila* | NRRL Y-17539 | yHMPu5000041850 | P | 1 | CCA | Q | CAA | - | - |
| *Debaryomyces subglobosus* | NRRL Y-6666 | yHMPu5000041824 | P | 1 | CCA | Q | CAA | - | - |
| *Metschnikowia kunwiensis* | NRRL Y-48698 | yHMPu5000041812 | P | 1 | CCA | Q | CAG | - | - |
| *Metschnikowia drosophilae* | NRRL Y-27458 | yHMPu5000041810 | P | 1 | CCA | Q | CAA | - | - |
| *Metschnikowia vanudenii* | NRRL Y-17036 | yHMPu5000041804 | P | 1 | CCA | Q | CAA | - | - |
| *Metschnikowia hawaiiana* | NRRL Y-27473 | yHMPu5000041743 | P | 1 | CCA | Q | CAA | - | - |
| *Metschnikowia borealis* | NRRL Y-27451 | yHMPu5000040956 | P | 1 | CCC | Q | CAA | - | - |
| *Metschnikowia hibisci* | NRRL Y-27453 | yHMPu5000040950 | P | 1 | CCA | Q | CAA | - | - |
| *Metschnikowia hawaiiensis* | NRRL Y-17272 | yHMPu5000040949 | P | 1 | CCC | Q | CAA | - | - |
| *Metschnikowia hamakuensis* | NRRL Y-27834 | yHMPu5000040948 | P | 1 | CCC | Q | CAA | - | - |
| *Metschnikowia dekortorum* | NRRL Y-27430 | yHMPu5000040945 | P | 2 | CCT  CCT | Q | CAA | - | - |
| *Metschnikowia lochheadii* | NRRL Y-27457 | yHMPu5000040941 | P | 1 | CCC | Q | CAA | - | - |
| *Metschnikowia similis* | NRRL Y-27627 | yHMPu5000040934 | P | 1 | CCT | Q | CAA | - | - |
| *Candida sequanensis* | NRRL Y-17682 | yHMPu5000040909 | P | 1 | CCA | Q | CAA | - | - |
| *Yamadazyma paraphyllophila* | CBS 9928 | yHMPu5000040908 | P | 1 | CCA | Q | CAA | - | - |
| *Candida chanthaburiensis* | CBS 10926 | yHMPu5000038397 | P | 1 | CCC | Q | CAG | - | - |
| *Candida danieliae* | CBS 8533 | yHMPu5000038395 | P | 1 | CCA | Q | CAA | - | - |
| *Hyphopichia khmerensis* | CBS 9784 | yHMPu5000038375 | P | 1 | CCA | Q | CAA | - | - |
| *Candida phyllophila* | CBS 12671 | yHMPu5000038370 | P | 1 | CCA | Q | CAA | - | - |
| *Candida suratensis* | CBS 10928 | yHMPu5000038355 | P | 1 | CCA | Q | CAA | - | - |
| *Candida vitiphila* | CBS 12672 | yHMPu5000038348 | P | 1 | CCA | Q | CAA | - | - |
| *Teunomyces panamensis* | NRRL Y-27657 | yHMPu5000038319 | P | 1 | CCA | Q | CAA | - | - |
| *Candida oceani* | CBS 11857 | yHMPu5000038098 | P | 1 | CCA | Q | CAA | - | - |
| *Candida subhashii* | CBS 10753 | yHMPu5000038083 | P | 1 | CCA | Q | CAA | - | - |
| *Candida xylanilytica* | NBRC 106499 | yHMPu5000038063 | P | 1 | CCA | Q | CAA | - | - |
| *Hyphopichia wangnamkhiaoensis* | CBS 11695 | yHMPu5000038062 | P | 1 | CCA | Q | CAA | - | - |
| *Yamadazyma epiphylla* | CBS 13384 | yHMPu5000038034 | P | 1 | CCA | Q | CAA | - | - |
| *Yamadazyma kitorensis* | JCM 31005 | yHMPu5000038032 | P | 1 | CCA | Q | CAA | - | - |
| *Yamadazyma phyllophila* | CBS 12572 | yHMPu5000038030 | P | 1 | CCA | Q | CAA | - | - |
| *Yamadazyma takamatsuzukensis* | NBRC 104391 | yHMPu5000038028 | P | 1 | CCA | Q | CAA | - | - |
| *Yamadazyma ubonensis* | CBS 12859 | yHMPu5000038026 | P | 1 | CCA | Q | CAA | - | - |
| *Candida auris* | CBS 10913 | yHMPu5000037929 | P | 1 | CCA | Q | CAG | - | - |
| *Suhomyces taliae* | NRRL Y-27589 | yHMPu5000037924 | P | 1 | CCA | Q | CAA | - | - |
| *Candida blattariae* | NRRL Y-27703 | yHMPu5000037917 | P | 1 | CCA | Q | CAA | - | - |
| *Candida carvajalis* | NRRL Y-48694 | yHMPu5000037916 | P | 1 | CCA | Q | CAA | - | - |
| *Candida michaelii* | NRRL Y-27705 | yHMPu5000037902 | P | 1 | CCA | Q | CAA | - | - |
| *Teunomyces pallodes* | NRRL Y-27653 | yHMPu5000037892 | P | 1 | CCA | Q | CAA | - | - |
| *Candida sake* | NRRL Y-1622 | yHMPu5000037885 | P | 1 | CCA | Q | CAA | - | - |
| *Candida coleopterorum* | CBS 14180 | yHMPu5000037238 | P | 1 | CCA | Q | CAA | - | - |
| *Candida asparagi* | CBS 9770 | yHMPu5000035721 | P | 1 | CCA | Q | CAA | - | - |
| *Kurtzmaniella cleridarum* | NRRL Y-48386 | yHMPu5000035667 | P | 1 | CCA | Q | CAA | - | - |
| *Candida blattae* | NRRL Y-27698 | yHMPu5000035335 | P | 1 | CCA | Q | CAA | - | - |
| *Candida saitoana* | NRRL Y-17316 | yHMPu5000035329 | P | 1 | CCA | Q | ATG | - | - |
| *Candida palmioleophila* | NRRL Y-17323 | yHMPu5000035328 | P | 1 | CCA | Q | CAA | - | - |
| *Candida anglica* | NRRL Y-27079 | yHMPu5000035314 | P | 1 | CCA | Q | CAA | - | - |
| *Candida cerambycidarum* | NRRL Y-27706 | yHMPu5000035248 | P | 1 | CCA | Q | CAA | - | - |
| *Teunomyces lycoperdinae* | NRRL Y-27658 | yHMPu5000035030 | P | 1 | CCA | Q | CAA | - | - |
| *Teunomyces tritomae* | NRRL Y-27650 | yHMPu5000035028 | P | 1 | CCA | Q | CAA | - | - |
| *Suhomyces maxii* | NRRL Y-27588 | yHMPu5000035025 | P | 1 | CCA | Q | CAA | - | - |
| *Suhomyces kunorum* | NRRL Y-27580 | yHMPu5000035024 | P | 1 | CCA | Q | CAA | - | - |
| *Suhomyces guaymorum* | NRRL Y-27568 | yHMPu5000035023 | P | 1 | CCA | Q | CAA | - | - |
| *Suhomyces chickasaworum* | NRRL Y-27566 | yHMPu5000035020 | P | 1 | CCA | Q | CAA | - | - |
| *Candida caryicola* | NRRL YB-1499 | yHMPu5000035019 | P | 1 | CCA | Q | CAA | - | - |
| *Suhomyces bolitotheri* | NRRL Y-27587 | yHMPu5000035016 | P | 1 | CCA | Q | CAA | - | - |
| *Suhomyces bokatorum* | NRRL Y-27571 | yHMPu5000035015 | P | 1 | CCA | Q | CAA | - | - |
| *Suhomyces atakaporum* | NRRL Y-27570 | yHMPu5000035014 | P | 1 | CCA | Q | CAA | - | - |
| *Suhomyces panamericanus* | NRRL Y-27567 | yHMPu5000035013 | P | 1 | CCA | Q | CAA | - | - |
| *Suhomyces prunicola* | NRRL YB-869 | yHMPu5000035012 | P | 1 | CCA | Q | CAA | - | - |
| *Suhomyces tanzawaensis* | NRRL Y-17324 | yHMPu5000035010 | P | 1 | CCA | Q | CAA | - | - |
| *Suhomyces wounanorum* | NRRL Y-27574 | yHMPu5000035007 | P | 1 | CCA | Q | CAA | - | - |
| *Candida neerlandica* | NRRL Y-27057 | yHMPu5000034994 | P56P/ P56Q/P56Q | 3 | CCA  CAA  CAG | Q | CAA | - | - |
| Sungouiella sharkensis | NRRL Y-48380 | yHMPu5000034984 | P | 1 | CCA | Q38M | ATG | - | - |
| *Hemisphaericaspora nanyangensis* | CBS 13020 | yHMPu5000034756 | P | 1 | CCA | Q | GCC | - | - |
| *Kodamaea leandrae* | NRRL Y-27757 | yHMPu5000034651 | P | 1 | CCA | Q | CAG | - | - |
| *Kodamaea plutei* | NRRL Y-27715 | yHMPu5000034649 | P | 1 | CCA | Q | CAA | - | - |
| *Diutina siamensis* | CBS 13388 | yHMPu5000026055 | P | 1 | CCC | Q | CAA | - | - |
| *Yamadazyma endophytica* | CBS 14163 | yHMPu5000026050 | P | 1 | CCA | Q | CAA | - | - |
| *Metschnikowia santaceciliae* | UWOPS 01-517a1 | metschnikowia_santaceciliae | P | 1 | CCC | Q38Q/Q38M | CAA  ATG | - | - |
| *Metschnikowia mauinuiana* | UWOPS 04-190.1 | metschnikowia_mauinuiana | P | 1 | CCC | Q38L | TTG | - | - |
| *Metschnikowia kamakouana* | UWOPS 04-112.5 | metschnikowia_kamakouana | P | 1 | CCC | Q | CAA | - | - |
| *Metschnikowia arizonensis* | UWOPS 99-103.4 | metschnikowia_arizonensis | P | 1 | CCA | Q | CAA | - | - |
| *Debaryomyces fabryi* | NRRL Y-17914 | yHMPu5000041829 | P | 1 | CCA | Q | CAA | - | + |
| *Candidozyma konsanensis* | CBS 12666 | yHMPu5000040919 | P | 1 | CCC | Q | CAG | - | + |
| *Candida andamanensis* | CBS 10859 | yHMPu5000038402 | P | 1 | CCA | Q | CAA | - | + |
| *Sungouiella ecuadorensis* | CBS 12653 | yHMPu5000038392 | P | 1 | CCA | Q | CAA | - | + |
| *Sungouiella middelhoveniana* | CBS 12306 | yHMPu5000038383 | P | 1 | CCA | Q | CAG | - | +needs to be re-analysed |
| *Candida theae* | CBS 12239 | yHMPu5000038357 | P | 1 | CCA | Q | CAA | - | + |
| *Candida thailandica* | CBS 10610 | yHMPu5000038356 | P | 1 | CCC | Q | CAG | - | + |
| *Metschnikowia lopburiensis* | CBS 12574 | yHMPu5000038331 | P | 1 | CCC | Q | CAA | - | + |
| *Diutina scorzettiae* | NRRL Y-27665 | yHMPu5000038071 | P | 1 | CCC | Q | CAA | - | + |
| *Diutina ranongensis* | CBS 10861 | yHMPu5000038070 | P | 1 | CCC | Q | CAA | - | + |
| *Suhomyces yuchorum* | NRRL Y-27569 | yHMPu5000038041 | P | 1 | CCA | Q | CAA | - | + needs further evaluation |
| *Yamadazyma siamensis* | CBS 12573 | yHMPu5000038029 | P | 1 | CCA | Q | CAA | - | + |
| *Candida parablackwelliae* | CBS 15228 | yHMPu5000037211 | P | 1 | CCA | Q | CAA | - | + |
| *Candida chauliodis* | NRRL Y-27909 | yHMPu5000035713 | P | 1 | CCA | Q | CAA | - | + |
| *Candida dosseyi* | NRRL Y-27950 | yHMPu5000035709 | P | 1 | CCA | Q | CAA | - | + |
| *Meyerozyma elateridarum* | NRRL Y-27647 | yHMPu5000035306 | P | 1 | CCA | Q | CAA | - | + |
| *Suhomyces ambrosiae* | NRRL YB-1316 | yHMPu5000035027 | P | 1 | CCA | Q | CAA | - | + |
| *Suhomyces anneliseae* | NRRL Y-27563 | yHMPu5000035026 | P | 1 | CCA | Q | CAA | - | + |
| *Suhomyces bribrorum* | NRRL Y-27572 | yHMPu5000035017 | P | 1 | CCA | Q | CAA | - | + |
| *Candida bohioensis* | NRRL Y-27737 | yHMPu5000035003 | P | 1 | CCA | Q | CAA | - | + |
| *Candida parapsilosis* | NRRL Y-12969 | yHMPu5000034995 | P | 1 | CCA | Q | CAA | - | + |
| *Candida glaebosa* | NRRL Y-6949 | yHMPu5000034656 | P | 1 | CCA | Q | CAA | - | + |
| *Candida tolerans* | CBS 8613 | yHMPu5000041838 | P | 1 | CCA | Q | CAA | - | N/A |
| *Debaryomyces marama* | NRRL Y-2171 | yHMPu5000041713 | P | 1 | CCA | Q | CAA | - | N/A |
| *Debaryomyces nepalensis* | NRRL Y-7108 | yHMPu5000041693 | P | 1 | CCA | Q | CAA | - | N/A |
| *Candida berkhoutiae* | CBS 11722 | yHMPu5000038406 | P | 1 | CCA | Q | CAG | - | N/A |
| *Candida ezoensis* | CBS 11753 | yHMPu5000038390 | P | 1 | CCA | Q | CAG | - | N/A |
| *Candida inulinophila* | CBS 11725 | yHMPu5000038387 | P | 1 | CCA | Q | CAG | - | N/A |
| *Candida loeiensis* | CBS 11899 | yHMPu5000038380 | P | 1 | CCA | Q | CAG | - | N/A |
| *Candida tanticharoeniae* | CBS 11574 | yHMPu5000038079 | P | 1 | CCC | Q | CAG | - | N/A |
| *Candida kanchanaburiensis* | NBRC 104475 | yHMPu5000037896 | P | 1 | CCA | Q | CAA | - | N/A |
| *Metschnikowia lachancei* | NRRL Y-27242 | yHMPu5000037866 | P | 1 | CCA | Q | CAA | - | N/A |
| *Scheffersomyces spartinae* | NRRL Y-7322 | yHMPu5000037857 | P | 1 | CCT | Q | CAA | - | N/A |
| *Candida parachauliodis* | CBS 13928 | yHMPu5000037254 | P | 1 | CCA | Q | CAA | - | N/A |
| *Lodderomyces beijingensis* | CBS 14171 | yHMPu5000037243 | P | 1 | CCA | Q | CAA | - | N/A |
| *Candida margitis* | CBS 14175 | yHMPu5000037240 | P | 1 | CCA | Q | CAA | - | N/A |
| *Candida gigantensis* | NRRL Y-27736 | yHMPu5000035715 | P | 1 | CCA | Q | CAA | - | N/A |
| *Candida rhizophorensis* | NRRL Y-48382 | yHMPu5000035704 | P | 1 | CCC | Q | CAG | - | N/A |
| *Kodamaea ohmeri* | NRRL Y-1932 | yHMPu5000035677 | P | 1 | CCA | Q | CAG | - | N/A |
| *Candida insectorum* | NRRL Y-7787 | yHMPu5000035246 | P | 1 | CCA | Q | CAA | - | N/A |
| *Suhomyces canberraensis* | NRRL YB-2417 | yHMPu5000035018 | P | 1 | CCA | Q | CAA | - | N/A |
| *Suhomyces vadensis* | NRRL Y-27778 | yHMPu5000035008 | P | 1 | CCA | Q | CAA | - | N/A |
| *Candida corydali* | NRRL Y-27910 | yHMPu5000034990 | P | 1 | CCA | Q | CAA | - | N/A |
| *Candida intermedia* | NRRL Y-981 | yHMPu5000034987 | P | 1 | CCA | Q | CAG | - | N/A |
| *Candida pseudointermedia* | NRRL Y-10939 | yHMPu5000034985 | P | 1 | CCA | Q | CAG | - | N/A |
| *Debaryomyces hansenii* | NRRL Y-7426 | yHMPu5000034659 | P | 1 | CCA | Q | CAA | - | N/A |
| *Kurtzmaniella quercitrusa* | NRRL Y-5392 | yHMPu5000034644 | P | 1 | CCA | Q | CAA | - | N/A |
| *Millerozyma acaciae* | NRRL Y-7117 | yHMPu5000034634 | P | 1 | CCA | Q | CAA | - | N/A |
| *Candida citri* | CBS 11858 | yHDO585 | P | 1 | CCA | Q | CAA | - | N/A |

*Amino acid in position 56 of ribosomal protein eL42 is either a proline (P) or a glutamine (Q indicated as P56Q)

# Amino acid in position 38 of ribosomal protein uL15, is in all cases a Glutamine

Species, where Westerdijk data needs to be re-evaluated, are indicated in green

Species where the genotype does not directly reflect the phenotype are indicated in yellow

Species with two copies of eL42—one P56Q and the other P56P—that exhibit a CHX-resistant phenotype are indicated in blue.

Table 10 *Sporopachydermiales* and *Trigonopsidales*

| Order | Species | Strain | Genome | eL42* | Codon 56 | uL15# | Codon 38 | Cycl 0.1% | Cycl 0.01% |
| --- | --- | --- | --- | --- | --- | --- | --- | --- | --- |
| Sporopachydermiales | *Sporopachydermia cereana* | NRRL Y-7798 | yHMPu5000035292 | P56Q | CAG | Q | CAA | + | + |
| Sporopachydermiales | *Sporopachydermia lactativora* | NRRL Y-11591 | yHMPu5000034604 | P56Q | CAG | Q | CAG | + | + |
| Sporopachydermiales | *Sporopachydermia quercuum* | NRRL Y-17847 | yHMPu5000034603 | P56Q | CAA | Q | CAA | + | + |
| Trigonopsidales | *Tortispora starmeri* | NRRL Y-63665 | yHMPu5000035279 | P | CCT | Q38L | TTG | N/A | + |
| Trigonopsidales | *Tortispora phaffii* | NRRL Y-48833 | yHMPu5000035278 | P | CCT | Q38L | TTG | N/A | + |
| Trigonopsidales | *Botryozyma nematodophila* | NRRL Y-17705 | yHMPu5000034655 | P56Q | CAA | Q | CAA | N/A | + |
| Trigonopsidales | *Ascobotryozyma americana* | CBS 8560 | yHMPu5000035710 | P56Q | CAA | Q | CAA | + | + |
| Trigonopsidales | *Trigonopsis variabilis* | NRRL Y-1579 | yHMPu5000035650 | P56Q | CAG | Q | CAG | + | + |
| Trigonopsidales | *Trigonopsis vinaria* | NRRL Y-5715 | yHMPu5000035282 | P56Q | CAG | Q | CAG | + | + |
| Trigonopsidales | *Trigonopsis cantarellii* | NRRL Y-17650 | yHMPu5000035281 | P56Q | CAG | Q | CAA | + | + |
| Trigonopsidales | *Tortispora ganteri* | NRRL Y-17035 | yHMPu5000035654 | P | CCT | Q38L | TTG | - | -  needs to be re-evaluated |
| Trigonopsidales | *Tortispora caseinolytica* | NRRL Y-17796 | yHMPu5000034572 | P | CCT | Q38L | TTG | - | Delayed growth |
| Trigonopsidales | *Tortispora mauiana* | NRRL Y-48832 | yHMPu5000034571 | P | CCT | Q38L | TTG | - | Delayed growth |
| Trigonopsidales | *Tortispora agaves* | NRRL Y-63662 | yHDO602 | P | CCT | Q38L | CTG | - | Delayed growth |
| Trigonopsidales | *Tortispora sangerardonensis* | NRRL Y-63663 | yHMPu5000038317 | P | CCT | Q38L | CTT | - | Delayed growth |

*Amino acid in position 56 of ribosomal protein eL42 is either a proline (P) or a glutamine (Q indicated as P56Q)

# Amino acid in position 38 of ribosomal protein uL15, is in all cases a Glutamine

Species, where Westerdijk data needs to be re-evaluated, are indicated in green
