# Supplementary material
Source: Research Square preprint supplement (doi:10.21203/rs.3.rs-9313202/v1)
Supplement: Supplementary file 3 [file 62a32ef9f8fcbcb6c7d658f7.xlsx]

## Sheet: uL15_
ID	NA_sequence	Clean Sequence	ATG Check	Length_Check	Has 38th Codon	Extract_38th Codon	CategoryLabel 38th Codon	Category Label defined
yHMPu5000035049_Barnettozyma_wickerhamii_SPAdes.haplomerger2.g003108.m1	TTTTCAACAGCCGGTAAGGGTCGTGTTGGTAAGCACAGAAAGCATCCAGGTGGTAGAGGTAAGGCCGGTGGTCAGCACCACCACAGAACCAACTTGGATAAGTACCATCCAGGTTACTTTGGTAAGGTCGGTCAAAGATACTTCCACAAGCAACAGCTACACTTCTGGAGACCAGTTTTGAACTTGGACAAGTTGTGGACCCTTGTTGAGGAGGAGAAGAGAGAGCAATACTTGAAGTCTGCTTCTTCCTCTGCTGCCCCAGTCATTGACACCCTAGCTGCTGGCTACGGTAAGGTCCTTGGTAAGGGTAGACTTCCAAACGTCCCAGTCATTGTTAAGGCTAGATTCGTTTCTGCTTTGGCTGAGAAGAAGATCAGAGAAGTTGGTGGTGTTGTTGAA…	TTTTCAACAGCCGGTAAGGGTCGTGTTGGTAAGCACAGAAAGCATCCAGGTGGTAGAGGTAAGGCCGGTGGTCAGCACCACCACAGAACCAACTTGGATAAGTACCATCCAGGTTACTTTGGTAAGGTCGGTCAAAGATACTTCCACAAGCAACAGCTACACTTCTGGAGACCAGTTTTGAACTTGGACAAGTTGTGGACCCTTGTTGAGGAGGAGAAGAGAGAGCAATACTTGAAGTCTGCTTCTTCCTCTGCTGCCCCAGTCATTGACACCCTAGCTGCTGGCTACGGTAAGGTCCTTGGTAAGGGTAGACTTCCAAACGTCCCAGTCATTGTTAAGGCTAGATTCGTTTCTGCTTTGGCTGAGAAGAAGATCAGAGAAGTTGGTGGTGTTGTTGAA…	WARN	411	YES	GGT	Other	Other (GGT)						CAG	299
yHMPu5000034713_kluyveromyces_marxianus_160519.haplomerger2_g004591.m1	GGTAAGGGTCGTGTCGGTAAGCATAGAAAGCATCCCGGTGGTAGAGGTATGGCCGGTGGTTTGCACCACCACAGAACTAACTTGGATAAGTACCATCCAGGTTACTTCGGTAAGGTCGGTATGAGATACTTCCACAAGCAACAAGCTCATTTCTGGAAGCCAGTTTTGAACTTGGACAAGTTGTGGACCTTGGTTCCAGAAGAAAAGAGAGAAGAATACTTGAAGTCCGCTTCCAAGTCTGCTGCTCCAGTCATCGACACCTTGGCTGCCGGTTACGGTAAGGTCTTGGGTAAGGGTAGAATTCCATCTGTCCCAGTTATTGTCAAGGCTAGATTCGTCTCCAAGTTGGCTGAAGAAAAGATCAAGGCTGCTGGTGGTGTTGTTGAATTGATTGCTTAA	GGTAAGGGTCGTGTCGGTAAGCATAGAAAGCATCCCGGTGGTAGAGGTATGGCCGGTGGTTTGCACCACCACAGAACTAACTTGGATAAGTACCATCCAGGTTACTTCGGTAAGGTCGGTATGAGATACTTCCACAAGCAACAAGCTCATTTCTGGAAGCCAGTTTTGAACTTGGACAAGTTGTGGACCTTGGTTCCAGAAGAAAAGAGAGAAGAATACTTGAAGTCCGCTTCCAAGTCTGCTGCTCCAGTCATCGACACCTTGGCTGCCGGTTACGGTAAGGTCTTGGGTAAGGGTAGAATTCCATCTGTCCCAGTTATTGTCAAGGCTAGATTCGTCTCCAAGTTGGCTGAAGAAAAGATCAAGGCTGCTGGTGGTGTTGTTGAATTGATTGCTTAA	WARN	399	YES	AAG	Other	Other (AAG)						CAA	730
yHMPu5000041701_Candida_jeffriesii_SPADES.haplomerger2_g008536.m1	GGTAAGGGTAGAGTTGGTAAGCACAGAAAGCATCCGGGTGGTAGAGGTATGGCCGGTGGTCAACATCACCACAGAACCAATTTGGATAAATACCATCCAGGTTACTTTGGTAAGGTTGGTATGAGATACTTCCACAAGCAAAATGCTCATTTCTGGAAACCAGAAATCAACTTGGACAAATTATGGACTTTAGTTGATGAAGAAAAGAGAGACGAATACTTAAAGTCTGCTTCTGCTTCTGCTGCCCCAGTCATTGATACCTTAGCCCACGGTTACGGTAAGGTCTTAGGTAAGGGTAGATTACCAGAAGTTCCAGTCATTGTCAAGGCTAGATTCGTTTCTAAATTAGCTGAAGAAAAGATTAGAGCTGTTGGTGGTGTTGTTGAATTAGTTGCTTAA	GGTAAGGGTAGAGTTGGTAAGCACAGAAAGCATCCGGGTGGTAGAGGTATGGCCGGTGGTCAACATCACCACAGAACCAATTTGGATAAATACCATCCAGGTTACTTTGGTAAGGTTGGTATGAGATACTTCCACAAGCAAAATGCTCATTTCTGGAAACCAGAAATCAACTTGGACAAATTATGGACTTTAGTTGATGAAGAAAAGAGAGACGAATACTTAAAGTCTGCTTCTGCTTCTGCTGCCCCAGTCATTGATACCTTAGCCCACGGTTACGGTAAGGTCTTAGGTAAGGGTAGATTACCAGAAGTTCCAGTCATTGTCAAGGCTAGATTCGTTTCTAAATTAGCTGAAGAAAAGATTAGAGCTGTTGGTGGTGTTGTTGAATTAGTTGCTTAA	WARN	399	YES	AAG	Other	Other (AAG)						CTA	16
yHMPu5000034628_pichia_fermentans_160519.haplomerger2.g000817.m1	GGTAAGGGTAGAGTTGGTAAGCACAGAAAGCATCCCGGTGGTAGAGGTATGGCCGGTGGTCAACACCACCACAGAACTAACTTGGACAAGTACCACCCAGGTTACTTCGGTAAGGTTGGTATGAGATACTTCCACAAGCAAAACGCTCACTTCTGGAAGCCAGTCATCAACCTTGACAAGTTATGGTCATTGGTTGAAAACAAGGACGAAAAGATTGCATCCTCTACTAAGGACGCAGCTATCGTCATTGACACTTTGGCTTCTGGTTACGGTAAGGTCTTAGGTAAGGGTAGACTCCCAGATGTTCCAGTCATTGTTAAGGCTAGATACGTTTCCAAGTTAGCAGAAGAAAAGATCAGAGCTGCTGGTGGTGTCGTTGAATTGATCGCTTAA	GGTAAGGGTAGAGTTGGTAAGCACAGAAAGCATCCCGGTGGTAGAGGTATGGCCGGTGGTCAACACCACCACAGAACTAACTTGGACAAGTACCACCCAGGTTACTTCGGTAAGGTTGGTATGAGATACTTCCACAAGCAAAACGCTCACTTCTGGAAGCCAGTCATCAACCTTGACAAGTTATGGTCATTGGTTGAAAACAAGGACGAAAAGATTGCATCCTCTACTAAGGACGCAGCTATCGTCATTGACACTTTGGCTTCTGGTTACGGTAAGGTCTTAGGTAAGGGTAGACTCCCAGATGTTCCAGTCATTGTTAAGGCTAGATACGTTTCCAAGTTAGCAGAAGAAAAGATCAGAGCTGCTGGTGGTGTCGTTGAATTGATCGCTTAA	WARN	393	YES	AAG	Other	Other (AAG)						CTG	5
yHMPu5000034628_pichia_fermentans_160519.haplomerger2.g000329.m1	GGTAAGGGTAGAGTTGGTAAGCACAGAAAGCATCCCGGTGGTAGAGGTATGGCCGGTGGTCAACACCACCACAGAACTAACTTGGACAAGTACCACCCAGGTTACTTCGGTAAGGTTGGTATGAGATACTTCCACAAGCAAAACGCTCACTTCTGGAAGCCAGTCATCAACCTTGACAAGTTATGGTCATTGGTTGAAAACAAGGACGAAAAGATTGCATCCTCTACTAAGGACGCAGCTATCGTCATTGACACTTTGGCTTCTGGTTACGGTAAGGTCTTAGGTAAGGGTAGACTCCCAGATGTTCCAGTCATTGTTAAGGCTAGATACGTTTCCAAGTTAGCAGAAGAAAAGATCAGAGCTGCTGGTGGTGTCGTTGAATTGATCGCTTAA	GGTAAGGGTAGAGTTGGTAAGCACAGAAAGCATCCCGGTGGTAGAGGTATGGCCGGTGGTCAACACCACCACAGAACTAACTTGGACAAGTACCACCCAGGTTACTTCGGTAAGGTTGGTATGAGATACTTCCACAAGCAAAACGCTCACTTCTGGAAGCCAGTCATCAACCTTGACAAGTTATGGTCATTGGTTGAAAACAAGGACGAAAAGATTGCATCCTCTACTAAGGACGCAGCTATCGTCATTGACACTTTGGCTTCTGGTTACGGTAAGGTCTTAGGTAAGGGTAGACTCCCAGATGTTCCAGTCATTGTTAAGGCTAGATACGTTTCCAAGTTAGCAGAAGAAAAGATCAGAGCTGCTGGTGGTGTCGTTGAATTGATCGCTTAA	WARN	393	YES	AAG	Other	Other (AAG)						CTT	6
yHMPu5000038091_candida_pseudolambica_201018.g004574.m1	GGTAACGGTCGTGTTGGTAAACACAGAAAGCATCCGGGTGGTAGAGGTATGGCCGGTGGTCAACATCATCACAGAACCAACTTAGATAAATACCATCCAGGTTATTTCGGTAAAGTCGGTATGAGATATTTCCACAAACAAAGAAATCATTTCTGGAAACCAGTTATCAACTTAGACAAATTATGGTCTTTAGTTGAAAACAAAGATGAAAAGATTGCTTCATCTACTAAGGATGCTGCAATTGTCATTGACACTTTAGCTTCTGGTTACGGTAAGGTTTTAGGTAAGGGTAGACTTCCACAAGTTCCAGTTATTGTTAAGGCTAGATACGTTTCTAAGTTAGCTGAAGAAAAAATCAGAGCAGCTGGTGGTGTCGTTGAATTAATCGCTTAA	GGTAACGGTCGTGTTGGTAAACACAGAAAGCATCCGGGTGGTAGAGGTATGGCCGGTGGTCAACATCATCACAGAACCAACTTAGATAAATACCATCCAGGTTATTTCGGTAAAGTCGGTATGAGATATTTCCACAAACAAAGAAATCATTTCTGGAAACCAGTTATCAACTTAGACAAATTATGGTCTTTAGTTGAAAACAAAGATGAAAAGATTGCTTCATCTACTAAGGATGCTGCAATTGTCATTGACACTTTAGCTTCTGGTTACGGTAAGGTTTTAGGTAAGGGTAGACTTCCACAAGTTCCAGTTATTGTTAAGGCTAGATACGTTTCTAAGTTAGCTGAAGAAAAAATCAGAGCAGCTGGTGGTGTCGTTGAATTAATCGCTTAA	WARN	393	YES	AAA	Other	Other (AAA)						CTC	4
yHMPu5000035693_hanseniaspora_nectarophila_160613.haplomerger2.g003416.m1	GGTAACGGTAGAATCGGTAAACACAGAAAGCATCCGGGTGGTAGAGGTATGGCCGGTGGTCAACATCACCACAGAATCAACTTAGATAAGTACCATCCAGGTTACTTCGGTAAAGTTGGTATGAGATACTTCCACAAGCAACAAAACCACTTCTGGAAGCCAGTCTTAAACTTAGACAAGTTATGGACTTTGATCCCAGAAGCCAAGAGAGATGACTACTTAAAGAACTCCTCTGCTACTTCTGCTCCAGTTATTGACACTTTAGCTCACGGTTACGGTAAGGTCTTAGGTAAGGGTAAGTTACCTCAAGTTCCAGTCATCGTCAAGGCTAGATTCGTTTCTAAGTTAGCTGAAGAAAAGATCAGAGCTGCTGGTGGTGTTGTTGAATTAATTGCTTAA	GGTAACGGTAGAATCGGTAAACACAGAAAGCATCCGGGTGGTAGAGGTATGGCCGGTGGTCAACATCACCACAGAATCAACTTAGATAAGTACCATCCAGGTTACTTCGGTAAAGTTGGTATGAGATACTTCCACAAGCAACAAAACCACTTCTGGAAGCCAGTCTTAAACTTAGACAAGTTATGGACTTTGATCCCAGAAGCCAAGAGAGATGACTACTTAAAGAACTCCTCTGCTACTTCTGCTCCAGTTATTGACACTTTAGCTCACGGTTACGGTAAGGTCTTAGGTAAGGGTAAGTTACCTCAAGTTCCAGTCATCGTCAAGGCTAGATTCGTTTCTAAGTTAGCTGAAGAAAAGATCAGAGCTGCTGGTGGTGTTGTTGAATTAATTGCTTAA	WARN	399	YES	AAA	Other	Other (AAA)						TTA	10
yHMPu5000035299_pichia_sp_170307.g004087.m1	GGACATAGACATAGAAGATCTGCTGCTATTTCAGGAGATTTCGATTCTTCCTCATTTCTTCAACCTCCAATAAATAATGCTTTCAATATCTCTAAATCTTTACCTTGTTCACCAATTAAACCTTCTAATAATACAAAATCAATAAATGATATATTAGATTCACCTTCTTTTTCAAACTCAACATTTTCAAACAATATAAACAACAATTCCACTCCTATATCAAATGTTTCTTCAACTCCGCTAAAATTTTATCTTACTGACGAAACTAAATTTTCAAACTCAAATTCAACTATACCTGATGCTTTAATTAATTTAGACGATATAAACAACAATACACCTTCTTTATCCTCTTCTTTACCAACATCGTTTGCATTGCCTTCTCTCTCGCTTAATTTAAAT…	GGACATAGACATAGAAGATCTGCTGCTATTTCAGGAGATTTCGATTCTTCCTCATTTCTTCAACCTCCAATAAATAATGCTTTCAATATCTCTAAATCTTTACCTTGTTCACCAATTAAACCTTCTAATAATACAAAATCAATAAATGATATATTAGATTCACCTTCTTTTTCAAACTCAACATTTTCAAACAATATAAACAACAATTCCACTCCTATATCAAATGTTTCTTCAACTCCGCTAAAATTTTATCTTACTGACGAAACTAAATTTTCAAACTCAAATTCAACTATACCTGATGCTTTAATTAATTTAGACGATATAAACAACAATACACCTTCTTTATCCTCTTCTTTACCAACATCGTTTGCATTGCCTTCTCTCTCGCTTAATTTAAAT…	WARN	1656	YES	CCA	Other	Other (CCA)						TTG	29
yHMPu5000034630_Magnusiomyces_magnusii_S134_MASURCA.haplomerger2.g005189.m1	CGCAAGAATCCTGGTGGTCGTGGTATGGCCGGTGGTCAGCACCATCACCGTACTAACCTCGATAAGTACCATCCCGGTTACTTTGGTAAGGTCGGTATGAGATACTTCCACAAGCAACAAAACCACTTCTGGAGACCCGTCATCAACGTCGAGAGCCTTTGGACTCTTGTCCCCGAAGAAAAGCGTGACCAATACGTCAAGGAAGCTTCTTCTTCTGCTGCTCCTGTCATCGACACCCTCGCTGCTGGCTACGGTAAGGTCCTTGGTAAGGGTTTCCTTCCCAAGATTCCTGTCATTGTCAAGGCTAGATTTGTTTCTGCTGAAGCCGAGCAAAAGATCAAGGAAGCTGGTGGTGCTGTTGAGCTCATTGCTTAA	CGCAAGAATCCTGGTGGTCGTGGTATGGCCGGTGGTCAGCACCATCACCGTACTAACCTCGATAAGTACCATCCCGGTTACTTTGGTAAGGTCGGTATGAGATACTTCCACAAGCAACAAAACCACTTCTGGAGACCCGTCATCAACGTCGAGAGCCTTTGGACTCTTGTCCCCGAAGAAAAGCGTGACCAATACGTCAAGGAAGCTTCTTCTTCTGCTGCTCCTGTCATCGACACCCTCGCTGCTGGCTACGGTAAGGTCCTTGGTAAGGGTTTCCTTCCCAAGATTCCTGTCATTGTCAAGGCTAGATTTGTTTCTGCTGAAGCCGAGCAAAAGATCAAGGAAGCTGGTGGTGCTGTTGAGCTCATTGCTTAA	WARN	375	YES	AAG	Other	Other (AAG)						TTT	1
yHMPu5000034971_candida_sp_160519.g000294.m1	ATGTCGTCCAGAAAGAAAACATTGCTCAAGGTGATCATCTTGGGTGACTCCGGCGTCGGAAAGACATCGCTCATGCAACGATTCGTGAACGGCAAGTTCTCCCACCAGTACAAGGCCACCATCGGCGCGGACTTCCTCACCAAGGAATTGCAAATAGATGACAAGACCGTCACAATGCAACTCTGGGACACTGCTGGCCAGGAGAGATTCCAGTCCCTCGGAGTCGCTTTCTACAGAGGCGCTGATTGTTGTGTCTTGGTGTACGACGTGACAAACCAGAAGTCCTTTGAGAATATCTCGGTATGGAAGGATGAGTTCCTAGTCCAGGCAAACGTCAAGAATCCAGAGAACTTCCCATTCGTTATCATTGGTAACAAGGTCGATGTTGACGAGTCCAAG…	ATGTCGTCCAGAAAGAAAACATTGCTCAAGGTGATCATCTTGGGTGACTCCGGCGTCGGAAAGACATCGCTCATGCAACGATTCGTGAACGGCAAGTTCTCCCACCAGTACAAGGCCACCATCGGCGCGGACTTCCTCACCAAGGAATTGCAAATAGATGACAAGACCGTCACAATGCAACTCTGGGACACTGCTGGCCAGGAGAGATTCCAGTCCCTCGGAGTCGCTTTCTACAGAGGCGCTGATTGTTGTGTCTTGGTGTACGACGTGACAAACCAGAAGTCCTTTGAGAATATCTCGGTATGGAAGGATGAGTTCCTAGTCCAGGCAAACGTCAAGAATCCAGAGAACTTCCCATTCGTTATCATTGGTAACAAGGTCGATGTTGACGAGTCCAAG…	OK	618	YES	AAG	Other	Other (AAG)						TTC	13
yHQL142_Suhomyces_sp_nov_plate33_DISCOVAR.g001121.m1	ATGTCACATTATTCCGCCAAAATTGACCGCTTTCCCAACCAATACTCCTACAATAAGTTTGGATCTAGAGCTCCAGGCCCAATCAAAGCAGTACCAGTCCAGGTCCAAGTTCAACACCAAACAGGACCAAGAAATATCAAGAGAGAGCCCATTAAGCTGCAAGTATTGCTGGTTGTTCAAGAAAATGATTACTCCAACAATTACGTTCGTACCGGTAAGTCTCCGGTGGAGTATATTCGTAACATCACCAATCCCGTTGAAGGTTACCCTAAGCTCAGTAAACTCCACCAACTCAAGAAAGAACAGGTCAGGATCCACGCTGTACAGCCCTACGGAGCACGGGTTCCCGCCAACAAAATCGTCAGCACCCTCAACCAATGGATCAATGGGTATGGGTTA…	ATGTCACATTATTCCGCCAAAATTGACCGCTTTCCCAACCAATACTCCTACAATAAGTTTGGATCTAGAGCTCCAGGCCCAATCAAAGCAGTACCAGTCCAGGTCCAAGTTCAACACCAAACAGGACCAAGAAATATCAAGAGAGAGCCCATTAAGCTGCAAGTATTGCTGGTTGTTCAAGAAAATGATTACTCCAACAATTACGTTCGTACCGGTAAGTCTCCGGTGGAGTATATTCGTAACATCACCAATCCCGTTGAAGGTTACCCTAAGCTCAGTAAACTCCACCAACTCAAGAAAGAACAGGTCAGGATCCACGCTGTACAGCCCTACGGAGCACGGGTTCCCGCCAACAAAATCGTCAGCACCCTCAACCAATGGATCAATGGGTATGGGTTA…	OK	1092	YES	CAA	Glutamine	Glutamine (CAA)						ATG	34
yHMPu5000034910_candida_sp_160519.g000001.m1	ATGGTTGAACAGTCGCATTTGCAGGAGTACGATAAGCTCACCAAGAAGCTCAAGCAAGCCCTGACCAAGAAGAAGAACTTCGATGAACAACTGACCAAAGTGGAGGAAGATATTTTCAACAAGGAAACAAGATACCTTTCAGAAGGTGCCAATCAAGGCAATATCATCAAGGGGTTTGAGAACTTCACCAGGGCAACCACCCAGAGTGCCACCGGTGGATATGGTGGAGGTGGTAACAGAAGCAAGAAAATCACATTCACCGACGAAGATCGTATCTTTTCACTAAGTTCTTCGACCTATGTTCGGCATTTGAAGAAGATCCAAGCCGGATTGAATCCAAGTAACAGTGCCATGGGTTCTATGGAAGATGATCTTATGGAAGATATAGAGAATGGCGAT…	ATGGTTGAACAGTCGCATTTGCAGGAGTACGATAAGCTCACCAAGAAGCTCAAGCAAGCCCTGACCAAGAAGAAGAACTTCGATGAACAACTGACCAAAGTGGAGGAAGATATTTTCAACAAGGAAACAAGATACCTTTCAGAAGGTGCCAATCAAGGCAATATCATCAAGGGGTTTGAGAACTTCACCAGGGCAACCACCCAGAGTGCCACCGGTGGATATGGTGGAGGTGGTAACAGAAGCAAGAAAATCACATTCACCGACGAAGATCGTATCTTTTCACTAAGTTCTTCGACCTATGTTCGGCATTTGAAGAAGATCCAAGCCGGATTGAATCCAAGTAACAGTGCCATGGGTTCTATGGAAGATGATCTTATGGAAGATATAGAGAATGGCGAT…	OK	456	YES	ATT	Other	Other (ATT)							1147
yHMPu5000037870_candida_sp_170912.g000001.m1	ATGGTGTATAACGTTTTTACCTCTTCTGCAATGACGATGATGTTGGTTTATATGGGCACTGCATTGCAATATCTTTTCATCGTTATATCACTATTGATGATGTTACCTATTTTGTTTCTATTATCATATGATCTGTTGTTATATACACTTCGGGTATTCCATTTGAAACATGTTACATTTGGAGTATTACAATGGTTTAATTCTTTAAGAGATTCAACAACAAATGGATTGATAATATGGACAATGAAATTAAAGAGTTTAGGTAGAAAACAGTTGTATAGTCAAAAAGTTATATCATGTGAGACTTGA	ATGGTGTATAACGTTTTTACCTCTTCTGCAATGACGATGATGTTGGTTTATATGGGCACTGCATTGCAATATCTTTTCATCGTTATATCACTATTGATGATGTTACCTATTTTGTTTCTATTATCATATGATCTGTTGTTATATACACTTCGGGTATTCCATTTGAAACATGTTACATTTGGAGTATTACAATGGTTTAATTCTTTAAGAGATTCAACAACAAATGGATTGATAATATGGACAATGAAATTAAAGAGTTTAGGTAGAAAACAGTTGTATAGTCAAAAAGTTATATCATGTGAGACTTGA	OK	309	YES	TTG	Leucine2	Leucine2 (TTG)
yHMPu5000034572_tortispora_caseinolytica_180604_g001534.m1	ATGGCTACTAGACTAAGAAAGAGTCGCAAACACAGAGGAAATGCCCCTCACGGATACGGTCGTGCTGGTAAGCATCGCTGCCACCCTGCCGGTCGCGGTAATGCCGGTGGTTTGACCCATCACCGTACCAACTTCGATAAATACCATCCTGGTTACTTCGGTAAGGTTGGTATGCGCGTATTCCACAAGCAGCCTGCTCATTACTGGAAACCTGTTATTAATATCGACAAGCTCTGGTCTCTTGTTGAGAGTGCTAACAGAGATGATCTTCTCAAGAATGCATCCACTGACTCAGCCCCTGTCATCGATACTTTGGCTCACGGTTACGGTAAAGTTTTAGGCAAGGGCCGTCTTCCTGAAGTTCCTGTCATCGTCAAGGCTCGCTTTGTTTCTAAGCTT…	ATGGCTACTAGACTAAGAAAGAGTCGCAAACACAGAGGAAATGCCCCTCACGGATACGGTCGTGCTGGTAAGCATCGCTGCCACCCTGCCGGTCGCGGTAATGCCGGTGGTTTGACCCATCACCGTACCAACTTCGATAAATACCATCCTGGTTACTTCGGTAAGGTTGGTATGCGCGTATTCCACAAGCAGCCTGCTCATTACTGGAAACCTGTTATTAATATCGACAAGCTCTGGTCTCTTGTTGAGAGTGCTAACAGAGATGATCTTCTCAAGAATGCATCCACTGACTCAGCCCCTGTCATCGATACTTTGGCTCACGGTTACGGTAAAGTTTTAGGCAAGGGCCGTCTTCCTGAAGTTCCTGTCATCGTCAAGGCTCGCTTTGTTTCTAAGCTT…	OK	450	YES	TTG	Leucine2	Leucine2 (TTG)
yHMPu5000034571_tortispora_mauiana_190924_g004122.m1	ATGGCTACTAGACTAAGAAAGAGTCGCAAACACAGAGGAAATGCCCCGCACGGATACGGTCGTGCTGGTAAGCATCGCTGCCATCCTGCCGGTCGCGGTAATGCCGGTGGTTTGACTCATCACCGTACCAACTTCGATAAATACCATCCTGGTTACTTCGGTAAGGTTGGTATGCGCGTATTCCACAAGCAGCCTGCCCATTACTGGAAGCCTGTTATCAATATCGACAAGCTCTGGTCTCTTGTTGAGAGCGCTAACAGAGATGATCTTCTCAAGAATGCATCCACTGACTCAGCCCCTGTAATCGACACTTTGGCTCACGGCTACGGCAAAGTTTTGGGCAAGGGCCGTCTTCCTGAAGTTCCTGTCATCGTCAAGGCTCGCTTTGTTTCTAAGCTT…	ATGGCTACTAGACTAAGAAAGAGTCGCAAACACAGAGGAAATGCCCCGCACGGATACGGTCGTGCTGGTAAGCATCGCTGCCATCCTGCCGGTCGCGGTAATGCCGGTGGTTTGACTCATCACCGTACCAACTTCGATAAATACCATCCTGGTTACTTCGGTAAGGTTGGTATGCGCGTATTCCACAAGCAGCCTGCCCATTACTGGAAGCCTGTTATCAATATCGACAAGCTCTGGTCTCTTGTTGAGAGCGCTAACAGAGATGATCTTCTCAAGAATGCATCCACTGACTCAGCCCCTGTAATCGACACTTTGGCTCACGGCTACGGCAAAGTTTTGGGCAAGGGCCGTCTTCCTGAAGTTCCTGTCATCGTCAAGGCTCGCTTTGTTTCTAAGCTT…	OK	450	YES	TTG	Leucine2	Leucine2 (TTG)
yHMPu5000035654_tortispora_ganteri_160519.haplomerger2_g001130.m1	ATGGCTACCAGACTAAGAAAGAGTCGCAAACATAGAGGAAATGCACCGCACGGATACGGTCGTGCTGGTAAGCATCGTTGCCATCCTGCCGGTCGTGGTAATGCCGGTGGTTTGACTCATCATCGTACCAACTTCGATAAATACCATCCTGGTTACTTCGGTAAGGTTGGTATGCGCGTATTCCACAAGCAGCCTGCCCATTACTGGAAGCCTGTTATTAATATTGACAAGCTCTGGTCTCTTGTTGAGAGCTCTAACAGAGATGATCTTCTCAAGAATGCATCTACTGACTCAGCCCCTGTCATCGACACTTTAGCTCACGGCTACGGCAAAGTTTTAGGCAAAGGACGTCTTCCTGAAGTTCCTGTCATCGTCAAGGCTCGCTTTGTTTCTAAGCTT…	ATGGCTACCAGACTAAGAAAGAGTCGCAAACATAGAGGAAATGCACCGCACGGATACGGTCGTGCTGGTAAGCATCGTTGCCATCCTGCCGGTCGTGGTAATGCCGGTGGTTTGACTCATCATCGTACCAACTTCGATAAATACCATCCTGGTTACTTCGGTAAGGTTGGTATGCGCGTATTCCACAAGCAGCCTGCCCATTACTGGAAGCCTGTTATTAATATTGACAAGCTCTGGTCTCTTGTTGAGAGCTCTAACAGAGATGATCTTCTCAAGAATGCATCTACTGACTCAGCCCCTGTCATCGACACTTTAGCTCACGGCTACGGCAAAGTTTTAGGCAAAGGACGTCTTCCTGAAGTTCCTGTCATCGTCAAGGCTCGCTTTGTTTCTAAGCTT…	OK	450	YES	TTG	Leucine2	Leucine2 (TTG)
yHMPu5000034970_Candida_sp._SPAdes.g000424.m1	ATGGCGTGGCCATTTGGAAGTAGAGGAGATAGCTCTCCCGACGAGAAGACAGAGGGAACTCAGCCAAGACGATCATCCGAGCGTCAAAAGACTACAACACCCGTGGAATCAAAGAAAGAGCAACAATTATTACTTGAAGATACTGAACCACGTTTCAACAATGGACCAGCAGCTCCACAACTTCCAATTAAACAGGCGATTGAAAGTATCAAGACTGAGGACTTCTCCTTTTCTAGCCTGGTAAAGATGCCCTGCTTCAGAGAGGCCGGTTTAACTGGCCTCTCAGCTCTTGGTGTCCTTGGTACAGTGGTTTTCTTGGTTCAAAAATCACCACAGAAGGCAGTTAACTGGGCCGTGGGAGGATTCCTATTAGGAAGTTGTGTATCTTGGGAACAATGT…	ATGGCGTGGCCATTTGGAAGTAGAGGAGATAGCTCTCCCGACGAGAAGACAGAGGGAACTCAGCCAAGACGATCATCCGAGCGTCAAAAGACTACAACACCCGTGGAATCAAAGAAAGAGCAACAATTATTACTTGAAGATACTGAACCACGTTTCAACAATGGACCAGCAGCTCCACAACTTCCAATTAAACAGGCGATTGAAAGTATCAAGACTGAGGACTTCTCCTTTTCTAGCCTGGTAAAGATGCCCTGCTTCAGAGAGGCCGGTTTAACTGGCCTCTCAGCTCTTGGTGTCCTTGGTACAGTGGTTTTCTTGGTTCAAAAATCACCACAGAAGGCAGTTAACTGGGCCGTGGGAGGATTCCTATTAGGAAGTTGTGTATCTTGGGAACAATGT…	OK	555	YES	AAG	Other	Other (AAG)
yHMPu5000034713_kluyveromyces_marxianus_160519.haplomerger2_g003667.m1	ATGGCCGGTGGTTTGCACCACCACAGAACTAACTTGGATAAGTACCATCCAGGTTACTTCGGTAAGGTCGGTATGAGATACTTCCACAAGCAACAAGCTCATTTCTGGAAGCCAGTTTTGAACTTGGACAAGTTGTGGACCTTGGTTCCAGAAGAAAAGAGAGAAGAATACTTGAAGTCCGCTTCCAAGTCTGCTGCTCCAGTCATCGACACCTTGGCTGCCGGTTACGGTAAGGTCTTGGGTAAGGGTAGAATTCCATCTGTCCCAGTTATTGTCAAGGCTAGATTCGTCTCCAAGTTGGCTGAAGAAAAGATCAAGGCTGCTGGTGGTGTTGTTGAATTGATTGCTTAA	ATGGCCGGTGGTTTGCACCACCACAGAACTAACTTGGATAAGTACCATCCAGGTTACTTCGGTAAGGTCGGTATGAGATACTTCCACAAGCAACAAGCTCATTTCTGGAAGCCAGTTTTGAACTTGGACAAGTTGTGGACCTTGGTTCCAGAAGAAAAGAGAGAAGAATACTTGAAGTCCGCTTCCAAGTCTGCTGCTCCAGTCATCGACACCTTGGCTGCCGGTTACGGTAAGGTCTTGGGTAAGGGTAGAATTCCATCTGTCCCAGTTATTGTCAAGGCTAGATTCGTCTCCAAGTTGGCTGAAGAAAAGATCAAGGCTGCTGGTGGTGTTGTTGAATTGATTGCTTAA	OK	351	YES	CCA	Other	Other (CCA)
yHMPu5000038336_pichia_sp_170713.g005000.m1	ATGGCATCGAACTCGTTGATTACCTCTGAGTTTTCTGGTGTCCCAGTCACGGGGATTGCCTTCACAAACATCTCTCTTGACAAACCTGTGTTGAAGTACCAGCCTCTCAGCGGCACTTCGTCGGAAACAGTTACTCCTCTACCATTGGATGCAACATCTAGACCATCGACCATAGAATGGATTGACGAGACGTACTTTGTCGTCTTGTACGACAACAAGCCATACTTCGAGCTCATGAATTCGAATGACATATCGAGGATTGATCAGCACGTCGATTTGGTCATCTCGTCACAACCAGCTTCTTGTTCTTGCTCAGTTTTTGACCGGAAGAGAAGAGTGTTGTATTTTCTTGACACTTCGAATAGACTGTATACATACTCTTTTGACAGTACGGCTGAT…	ATGGCATCGAACTCGTTGATTACCTCTGAGTTTTCTGGTGTCCCAGTCACGGGGATTGCCTTCACAAACATCTCTCTTGACAAACCTGTGTTGAAGTACCAGCCTCTCAGCGGCACTTCGTCGGAAACAGTTACTCCTCTACCATTGGATGCAACATCTAGACCATCGACCATAGAATGGATTGACGAGACGTACTTTGTCGTCTTGTACGACAACAAGCCATACTTCGAGCTCATGAATTCGAATGACATATCGAGGATTGATCAGCACGTCGATTTGGTCATCTCGTCACAACCAGCTTCTTGTTCTTGCTCAGTTTTTGACCGGAAGAGAAGAGTGTTGTATTTTCTTGACACTTCGAATAGACTGTATACATACTCTTTTGACAGTACGGCTGAT…	OK	1950	YES	GGC	Other	Other (GGC)
yHMPu5000026270_Candida_sp._SPAdes.g000557.m1	ATGGCAACTGTGGCAACATTATCTTATAAAGAATTAGGTTTAGTCGAAGACTACAAAACTGGATCTCATTCCTATGATATTCCCAGGGAGACCTTGGAATTGGAGGTTGCTTCATATTTGAAGATGCTAGAGTCTAAAGAGTCGTTCAATCCAAATTTGAAGTTTAATCCTTCCAAACATATAATCTTTGAAGAGAAGTATTACGAGACGACAAAGAAGTTTACTCTTGACGAGCTAAACATTCCAAAGTATAGAGCCAAACCTTTGTCAAACGTAGCGGCCGTGTACCCATTTCCTTTGCTTTCTCAAGAAGCAATTGATATGGTGCTATGGGAGTCTTTAAAGCCTGAAGCCTTAAAAGGATGGGGCCGTTTACCTAACTTATCCAAAGATGCAACC…	ATGGCAACTGTGGCAACATTATCTTATAAAGAATTAGGTTTAGTCGAAGACTACAAAACTGGATCTCATTCCTATGATATTCCCAGGGAGACCTTGGAATTGGAGGTTGCTTCATATTTGAAGATGCTAGAGTCTAAAGAGTCGTTCAATCCAAATTTGAAGTTTAATCCTTCCAAACATATAATCTTTGAAGAGAAGTATTACGAGACGACAAAGAAGTTTACTCTTGACGAGCTAAACATTCCAAAGTATAGAGCCAAACCTTTGTCAAACGTAGCGGCCGTGTACCCATTTCCTTTGCTTTCTCAAGAAGCAATTGATATGGTGCTATGGGAGTCTTTAAAGCCTGAAGCCTTAAAAGGATGGGGCCGTTTACCTAACTTATCCAAAGATGCAACC…	OK	1221	YES	TCA	Other	Other (TCA)
yHMPu5000035300_pichia_sp_170307.g002000.m1	ATGGCAACTATAGCAGCAGCGGTGGCCCGTGTGCACTGTGAAAGGGTCATGCTCAACCCGATCCGTGCGTTCAGCGGATCCTCGCACAGAGAACTAACAAAAGTTGGGCCTAACAGTCTAAACGTTCTTGGCACAGAGTACAAGACCGACGAGTGGACTAATGCAACACCCCGCATTCTCTCCTTGGTGGGTAGAGACCTACACAAAAATAAGAACCATCCGATCGGTATTTTGCGGTCGCTGATTGAAAACAGATTTGACGGTCTTGGATACACCATGTATGGAGACATGAAGCCCAACGTCTCGGTTCACGAGAACTTCGACGTTTTGGGTTTTCCCGGAGACCACGTCGGACGTTCCAAGAGTGACACATACTACCTCAACAAGGACCATCTTTTG…	ATGGCAACTATAGCAGCAGCGGTGGCCCGTGTGCACTGTGAAAGGGTCATGCTCAACCCGATCCGTGCGTTCAGCGGATCCTCGCACAGAGAACTAACAAAAGTTGGGCCTAACAGTCTAAACGTTCTTGGCACAGAGTACAAGACCGACGAGTGGACTAATGCAACACCCCGCATTCTCTCCTTGGTGGGTAGAGACCTACACAAAAATAAGAACCATCCGATCGGTATTTTGCGGTCGCTGATTGAAAACAGATTTGACGGTCTTGGATACACCATGTATGGAGACATGAAGCCCAACGTCTCGGTTCACGAGAACTTCGACGTTTTGGGTTTTCCCGGAGACCACGTCGGACGTTCCAAGAGTGACACATACTACCTCAACAAGGACCATCTTTTG…	OK	1401	YES	AAC	Other	Other (AAC)
yHMPu5000034596_candida_sp_160613.g000001.m1	ATGGATGGCTCAGGAATCCCAGCAAAGGACATTGAGGCCAACAAAAAGGAGCCAGTGTTGCAAAAGAGACTGCTTACACCGTTCTTGTCCAAGAAAATTCCACCAATCCCAAAGGAAGAAGACAAAAAGGAGTATGCTGAACACCATGCCAATATAATTTCACAAATGTTCTTTTGGTGGCTGGTGCCGACAATGTCTGTCGGATACAAAAGAACCATTGAAGACACCGACTTGTTTAAGCTGACCGAAAAAATGACAAACAAAGTCAACTACGAGACCTTCGAAGCTAATCTGGCTAAGATTATCGAAAAAAATAAGGCAAAACAACTGAAACTGAATCCAGCTTTAACTCCTGAAGAGCTAGAAAACTTGCCATATCCAAAACTCTCCATCATCGAA…	ATGGATGGCTCAGGAATCCCAGCAAAGGACATTGAGGCCAACAAAAAGGAGCCAGTGTTGCAAAAGAGACTGCTTACACCGTTCTTGTCCAAGAAAATTCCACCAATCCCAAAGGAAGAAGACAAAAAGGAGTATGCTGAACACCATGCCAATATAATTTCACAAATGTTCTTTTGGTGGCTGGTGCCGACAATGTCTGTCGGATACAAAAGAACCATTGAAGACACCGACTTGTTTAAGCTGACCGAAAAAATGACAAACAAAGTCAACTACGAGACCTTCGAAGCTAATCTGGCTAAGATTATCGAAAAAAATAAGGCAAAACAACTGAAACTGAATCCAGCTTTAACTCCTGAAGAGCTAGAAAACTTGCCATATCCAAAACTCTCCATCATCGAA…	OK	4179	YES	AAG	Other	Other (AAG)
yHMPu5000034713_kluyveromyces_marxianus_160519.haplomerger2_g004653.m1	ATGGATAGTTTATTTGAATCTATGGCGGAAGCCGGTAAGGGTCGTGTCGGTAAGCATAGAAAGCATCCCGGTGGTAGAGGTATGGCCGGTGGTTTGCACCACCACAGAACTAACTTGGATAAGTACCATCCAGGTTACTTCGGTAAGGTCGGTATGAGATACTTCCACAAGCAACAAGCTCATTTCTGGAAGCCAGTTTTGAACTTGGACAAGTTGTGGACCTTGGTTCCAGAAGAAAAGAGAGAAGAATACTTGAAGTCCGCTTCCAAGTCTGCTGCTCCAGTCATCGACACCTTGGCTGCCGGTTACGGTAAGGTCTTGGGTAAGGGTAGAATTCCATCTGTCCCAGTTATTGTCAAGGCTAGATTCGTCTCCAAGTTGGCTGAAGAAAAGATCAAG…	ATGGATAGTTTATTTGAATCTATGGCGGAAGCCGGTAAGGGTCGTGTCGGTAAGCATAGAAAGCATCCCGGTGGTAGAGGTATGGCCGGTGGTTTGCACCACCACAGAACTAACTTGGATAAGTACCATCCAGGTTACTTCGGTAAGGTCGGTATGAGATACTTCCACAAGCAACAAGCTCATTTCTGGAAGCCAGTTTTGAACTTGGACAAGTTGTGGACCTTGGTTCCAGAAGAAAAGAGAGAAGAATACTTGAAGTCCGCTTCCAAGTCTGCTGCTCCAGTCATCGACACCTTGGCTGCCGGTTACGGTAAGGTCTTGGGTAAGGGTAGAATTCCATCTGTCCCAGTTATTGTCAAGGCTAGATTCGTCTCCAAGTTGGCTGAAGAAAAGATCAAG…	OK	432	YES	AAC	Other	Other (AAC)
yHMPu5000034713_kluyveromyces_marxianus_160519.haplomerger2_g004653.m1	ATGGATAGTTTATTTGAATCTATGGCGGAAGCCGGTAAGGGTCGTGTCGGTAAGCATAGAAAGCATCCCGGTGGTAGAGGTATGGCCGGTGGTTTGCACCACCACAGAACTAACTTGGATAAGTACCATCCAGGTTACTTCGGTAAGGTCGGTATGAGATACTTCCACAAGCAACAAGCTCATTTCTGGAAGCCAGTTTTGAACTTGGACAAGTTGTGGACCTTGGTTCCAGAAGAAAAGAGAGAAGAATACTTGAAGTCCGCTTCCAAGTCTGCTGCTCCAGTCATCGACACCTTGGCTGCCGGTTACGGTAAGGTCTTGGGTAAGGGTAGAATTCCATCTGTCCCAGTTATTGTCAAGGCTAGATTCGTCTCCAAGTTGGCTGAAGAAAAGATCAAG…	ATGGATAGTTTATTTGAATCTATGGCGGAAGCCGGTAAGGGTCGTGTCGGTAAGCATAGAAAGCATCCCGGTGGTAGAGGTATGGCCGGTGGTTTGCACCACCACAGAACTAACTTGGATAAGTACCATCCAGGTTACTTCGGTAAGGTCGGTATGAGATACTTCCACAAGCAACAAGCTCATTTCTGGAAGCCAGTTTTGAACTTGGACAAGTTGTGGACCTTGGTTCCAGAAGAAAAGAGAGAAGAATACTTGAAGTCCGCTTCCAAGTCTGCTGCTCCAGTCATCGACACCTTGGCTGCCGGTTACGGTAAGGTCTTGGGTAAGGGTAGAATTCCATCTGTCCCAGTTATTGTCAAGGCTAGATTCGTCTCCAAGTTGGCTGAAGAAAAGATCAAG…	OK	432	YES	AAC	Other	Other (AAC)
yHMPu5000034621_pichia_sp_160519.g002465.m1	ATGGACAAGTCTATCAAAAGAGGTCTCTCGGACCGGATCTACGAAAAACGTAAAGCAACAGCCCTGGAATTGGAAAACATCGTCTCAAACGCAATCAACAATAACGACATCGAGCAAATCAACTCCATCATAAAACAACTTAGAAACGAATTCGCATACAACATCAACGACCCACTCTCGAGATACGGTGGCTTGATCGGTCTTGCTGCCATCTCAATTGCCCTAGGCCCAAACGAACTACCGAAATACCTGAACAATATCATCCACCCCGTCATAGCTTGCTTTGGCGACAATGACCCTAATGTTAGGTATTACGCCTGCGAAGCTTTGTATAATATTACCAAAGTTGCGAAGGGAGAAATCTTGCTCTATTTTAATGAAATTTTCGACATTTTATGT…	ATGGACAAGTCTATCAAAAGAGGTCTCTCGGACCGGATCTACGAAAAACGTAAAGCAACAGCCCTGGAATTGGAAAACATCGTCTCAAACGCAATCAACAATAACGACATCGAGCAAATCAACTCCATCATAAAACAACTTAGAAACGAATTCGCATACAACATCAACGACCCACTCTCGAGATACGGTGGCTTGATCGGTCTTGCTGCCATCTCAATTGCCCTAGGCCCAAACGAACTACCGAAATACCTGAACAATATCATCCACCCCGTCATAGCTTGCTTTGGCGACAATGACCCTAATGTTAGGTATTACGCCTGCGAAGCTTTGTATAATATTACCAAAGTTGCGAAGGGAGAAATCTTGCTCTATTTTAATGAAATTTTCGACATTTTATGT…	OK	2493	YES	GAG	Other	Other (GAG)
yHDO601_candida_tunisiensis_180604.g000128.m1	ATGCTCCGCATGGGGAACCCCTATCTGGAGATGTACGAGGACGGCGTCGCCGTGCCCAAGTTTCGCATCGGCCCCGCGCCCGCCCAGCCGTCCGTGCCCAGTCGCGCAAACACCACCGCGAGCACGGCCTCGTACCCCATGAGCCCGTCCGACATACAGCCAGGCTCCGTGCAAGCGTCTCCGGCGCTCCCTCAGGCCCGGCCAAACCCCAGCTACGGCCCGGCACCTACCGTGCCAGTGGGCCAGATGCCGGCGCACGCACCGGCCAGCGCGCCTTCGATCAAGCAAACAGCGCCGCTCAACATCGGCCGACGTCCCGTGTCCGGCAGCGGCCCGCCCGGCGCGTTTCCCGGCGCCCCTCAAGCGCCTCCAGTGCCGGCCCCGGGCGCACAGCAACCA…	ATGCTCCGCATGGGGAACCCCTATCTGGAGATGTACGAGGACGGCGTCGCCGTGCCCAAGTTTCGCATCGGCCCCGCGCCCGCCCAGCCGTCCGTGCCCAGTCGCGCAAACACCACCGCGAGCACGGCCTCGTACCCCATGAGCCCGTCCGACATACAGCCAGGCTCCGTGCAAGCGTCTCCGGCGCTCCCTCAGGCCCGGCCAAACCCCAGCTACGGCCCGGCACCTACCGTGCCAGTGGGCCAGATGCCGGCGCACGCACCGGCCAGCGCGCCTTCGATCAAGCAAACAGCGCCGCTCAACATCGGCCGACGTCCCGTGTCCGGCAGCGGCCCGCCCGGCGCGTTTCCCGGCGCCCCTCAAGCGCCTCCAGTGCCGGCCCCGGGCGCACAGCAACCA…	OK	1308	YES	ACC	Other	Other (ACC)
yHMH685_Yamadazyma_sp_nov_plate33_DISCOVAR_g005784.m1	ATGCCTTCTAGATTGACTAAGACCAGAAAGCACAGAGGACACGTTTCTGCCGGTAAGGGTAGAATTGGTAAGCACAGAAAGCATCCCGGTGGTAGAGGTATGGCCGGTGGTCAACATCACCACAGAACCAACTTGGACAAGTACCACCCTGGTTACTTCGGTAAAGTTGGTATGAGATACTTCCACAAGCAACAAAACCACTTCTGGAGACCAGAAATCAACTTGGACAAGTTGTGGACTTTGGTTGACGAAGAAAAGAAGGAGGAATACTTGAAGTCTGCTTCCACCTCCGCTGCCCCAGTCATTGACACCTTGGCTCACGGTTACGGTAAGGTTTTAGGTAAGGGTAGATTACCAGAAGTTCCAGTCATTGTCAAGGCCAGATTTGTTTCCAAGTTG…	ATGCCTTCTAGATTGACTAAGACCAGAAAGCACAGAGGACACGTTTCTGCCGGTAAGGGTAGAATTGGTAAGCACAGAAAGCATCCCGGTGGTAGAGGTATGGCCGGTGGTCAACATCACCACAGAACCAACTTGGACAAGTACCACCCTGGTTACTTCGGTAAAGTTGGTATGAGATACTTCCACAAGCAACAAAACCACTTCTGGAGACCAGAAATCAACTTGGACAAGTTGTGGACTTTGGTTGACGAAGAAAAGAAGGAGGAATACTTGAAGTCTGCTTCCACCTCCGCTGCCCCAGTCATTGACACCTTGGCTCACGGTTACGGTAAGGTTTTAGGTAAGGGTAGATTACCAGAAGTTCCAGTCATTGTCAAGGCCAGATTTGTTTCCAAGTTG…	OK	450	YES	CAA	Glutamine	Glutamine (CAA)
yHMPu5000038037_yamadazyma_akitaensis_170912_g000180.m1	ATGCCTTCTAGATTGACTAAGACCAGAAAGCACAGAGGACACGTTTCCGCCGGTAGAGGTAGAATCGGTAAGCACAGAAAGCATCCCGGTGGTAGAGGTATGGCTGGTGGTCAACATCACCACAGAACCAACTTGGATAAGTACCATCCAGGTTACTTCGGTAAGGTTGGTATGAGATACTTCCACAAGCAACAAAACCACTTCTGGAGACCTGAAATCAACTTGGACAAGTTGTGGACTTTAGTTGACGAAGAAAAGAAGGACGAATACTTGAAGTCTGCTTCTACTTCTGCTGCTCCAGTCATTGACACCTTGGCCCACGGTTACGGTAAGGTTTTAGCTAAGGGTAGATTACCAAACGCTCCAGTCATTGTCAAGGCCAGATTTGTTTCCAAGTTG…	ATGCCTTCTAGATTGACTAAGACCAGAAAGCACAGAGGACACGTTTCCGCCGGTAGAGGTAGAATCGGTAAGCACAGAAAGCATCCCGGTGGTAGAGGTATGGCTGGTGGTCAACATCACCACAGAACCAACTTGGATAAGTACCATCCAGGTTACTTCGGTAAGGTTGGTATGAGATACTTCCACAAGCAACAAAACCACTTCTGGAGACCTGAAATCAACTTGGACAAGTTGTGGACTTTAGTTGACGAAGAAAAGAAGGACGAATACTTGAAGTCTGCTTCTACTTCTGCTGCTCCAGTCATTGACACCTTGGCCCACGGTTACGGTAAGGTTTTAGCTAAGGGTAGATTACCAAACGCTCCAGTCATTGTCAAGGCCAGATTTGTTTCCAAGTTG…	OK	450	YES	CAA	Glutamine	Glutamine (CAA)
yHAB164_kazachstania_aerobia_160519.g002749.m1	ATGCCTTCCAGATTTACTAAGACTAGAAAGCACAGAGGTCACGTCTCAGCCGGTAAGGGTAGAATCGGTAAGCACAGAAAGCATCCCGGTGGTAGAGGTATGGCTGGTGGTCAACATCATCACAGAATCAACTTAGATAAGTACCATCCAGGTTACTTCGGTAAGGTTGGTATGAGATACTTCCACAAGCAACAAGGTCATTTCTGGAAGCCAGTCTTAAACTTAGATAAGTTATGGACTTTAATCCCAGAAGAAAAGAGAGACGAATACTTAAAGAACGCCTCTACTTCTGCTGCTCCAGTTATTGACACTTTAGCTGCCGGTTACGGTAAGGTCTTAGGTAAGGGTAGAATTCCAAACGTCCCAGTTATTGTTAAGGCTAGATTCGTTTCCAAGTTA…	ATGCCTTCCAGATTTACTAAGACTAGAAAGCACAGAGGTCACGTCTCAGCCGGTAAGGGTAGAATCGGTAAGCACAGAAAGCATCCCGGTGGTAGAGGTATGGCTGGTGGTCAACATCATCACAGAATCAACTTAGATAAGTACCATCCAGGTTACTTCGGTAAGGTTGGTATGAGATACTTCCACAAGCAACAAGGTCATTTCTGGAAGCCAGTCTTAAACTTAGATAAGTTATGGACTTTAATCCCAGAAGAAAAGAGAGACGAATACTTAAAGAACGCCTCTACTTCTGCTGCTCCAGTTATTGACACTTTAGCTGCCGGTTACGGTAAGGTCTTAGGTAAGGGTAGAATTCCAAACGTCCCAGTTATTGTTAAGGCTAGATTCGTTTCCAAGTTA…	OK	450	YES	CAA	Glutamine	Glutamine (CAA)
yHAB159_kazachstania_solicola_160519.haplomerger2.g005035.m1	ATGCCTTCCAGATTTACTAAGACTAGAAAGCACAGAGGTCACGTCTCAGCCGGTAAGGGTAGAATCGGTAAGCACAGAAAGCATCCCGGTGGTAGAGGTATGGCTGGTGGTCAACATCATCACAGAATCAACTTAGATAAGTACCATCCAGGTTACTTCGGTAAGGTTGGTATGAGATACTTCCACAAGCAACAAGGTCATTTCTGGAAGCCAGTCTTAAACTTAGATAAGTTATGGACTTTAATCCCAGAAGAAAAGAGAGACGAATACTTAAAGAACGCCTCTTCTTCTGCTGCTCCAGTTATTGACACTTTAGCTGCCGGTTACGGTAAGGTCTTAGGTAAGGGTAGAATTCCAAACGTCCCAGTTATTGTTAAGGCTAGATTCGTTTCCAAGTTA…	ATGCCTTCCAGATTTACTAAGACTAGAAAGCACAGAGGTCACGTCTCAGCCGGTAAGGGTAGAATCGGTAAGCACAGAAAGCATCCCGGTGGTAGAGGTATGGCTGGTGGTCAACATCATCACAGAATCAACTTAGATAAGTACCATCCAGGTTACTTCGGTAAGGTTGGTATGAGATACTTCCACAAGCAACAAGGTCATTTCTGGAAGCCAGTCTTAAACTTAGATAAGTTATGGACTTTAATCCCAGAAGAAAAGAGAGACGAATACTTAAAGAACGCCTCTTCTTCTGCTGCTCCAGTTATTGACACTTTAGCTGCCGGTTACGGTAAGGTCTTAGGTAAGGGTAGAATTCCAAACGTCCCAGTTATTGTTAAGGCTAGATTCGTTTCCAAGTTA…	OK	450	YES	CAA	Glutamine	Glutamine (CAA)
yHAB151_kazachstania_servazzi_160519.g000805.m1	ATGCCTTCCAGATTTACTAAGACTAGAAAGCACAGAGGTCACGTCTCAGCCGGTAAGGGTAGAATCGGTAAGCACAGAAAGCATCCCGGTGGTAGAGGTATGGCCGGTGGTCAACATCATCACAGAATTAATTTGGATAAATACCATCCAGGTTACTTCGGTAAGGTCGGTATGAGATACTTCCACAAGCAACAAGGTCATTTCTGGAAGCCAGTCTTAAACTTAGATAAGTTATGGACTTTAATCCCAGAAGAAAAGAGAGACGAATACTTAAAGAACGCCTCTACTTCTGCTGCTCCAGTTATTGACACTTTAGCTGCCGGTTACGGTAAGGTCTTAGGTAAGGGTAGAATTCCAAACGTCCCAGTTATCGTCAAGGCTAGATTTGTTTCCAAGTTA…	ATGCCTTCCAGATTTACTAAGACTAGAAAGCACAGAGGTCACGTCTCAGCCGGTAAGGGTAGAATCGGTAAGCACAGAAAGCATCCCGGTGGTAGAGGTATGGCCGGTGGTCAACATCATCACAGAATTAATTTGGATAAATACCATCCAGGTTACTTCGGTAAGGTCGGTATGAGATACTTCCACAAGCAACAAGGTCATTTCTGGAAGCCAGTCTTAAACTTAGATAAGTTATGGACTTTAATCCCAGAAGAAAAGAGAGACGAATACTTAAAGAACGCCTCTACTTCTGCTGCTCCAGTTATTGACACTTTAGCTGCCGGTTACGGTAAGGTCTTAGGTAAGGGTAGAATTCCAAACGTCCCAGTTATCGTCAAGGCTAGATTTGTTTCCAAGTTA…	OK	450	YES	CAA	Glutamine	Glutamine (CAA)
yHMPu5000034708_kazachstania_yasuniensis_180604.g001175.m1	ATGCCTTCCAGATTTACTAAGACTAGAAAGCACAGAGGTCACGTCTCAGCCGGTAAGGGTAGAATCGGTAAGCACAGAAAGCATCCCGGTGGTAGAGGTAAGGCTGGTGGTCAACATCATCACAGAATTAATTTAGATAAGTACCATCCAGGTTACTTCGGTAAGGTTGGTATGAGATACTTCCACAAGCAACAAGGTCATTTCTGGAAGCCAGTCTTAAACTTAGATAAGTTATGGACTTTAATCCCAGAAGAAAAGAGAGATGAATACTTAAAGAACTCCTCTGCTACTTCTGCTCCAGTTATTGACACTTTAGCTGCCGGTTACGGTAAGGTCTTAGGTAAGGGTAGAATTCCAAACGTCCCAGTTATCGTCAAGGCTAGATTCGTTTCTAAATTA…	ATGCCTTCCAGATTTACTAAGACTAGAAAGCACAGAGGTCACGTCTCAGCCGGTAAGGGTAGAATCGGTAAGCACAGAAAGCATCCCGGTGGTAGAGGTAAGGCTGGTGGTCAACATCATCACAGAATTAATTTAGATAAGTACCATCCAGGTTACTTCGGTAAGGTTGGTATGAGATACTTCCACAAGCAACAAGGTCATTTCTGGAAGCCAGTCTTAAACTTAGATAAGTTATGGACTTTAATCCCAGAAGAAAAGAGAGATGAATACTTAAAGAACTCCTCTGCTACTTCTGCTCCAGTTATTGACACTTTAGCTGCCGGTTACGGTAAGGTCTTAGGTAAGGGTAGAATTCCAAACGTCCCAGTTATCGTCAAGGCTAGATTCGTTTCTAAATTA…	OK	450	YES	CAA	Glutamine	Glutamine (CAA)
yHAB143_kazachstania_siamensis_160519.g000375.m1	ATGCCTTCCAGATTTACTAAGACTAGAAAGCACAGAGGTCACGTCTCAGCCGGTAAGGGTAGAATCGGTAAGCACAGAAAGCATCCCGGTGGTAGAGGTAAGGCTGGTGGTCAACATCATCACAGAATTAACTTAGATAAATACCATCCAGGTTATTTCGGTAAGGTTGGTATGAGATACTTCCACAAGCAACAAGGTCATTTCTGGAAGCCAGTCTTAAACTTAGACAAGTTATGGACTTTAATCCCAGAAGAAAAGAGAGACGAATACTTAAAGAACGCCTCTGCTACTTCTGCTCCAGTTATTGACACTTTAGCTGCCGGTTACGGTAAGGTCTTAGGTAAGGGTAGAATTCCAAACGTCCCAGTTATTGTCAAGGCCAGATTCGTCTCCAAGTTA…	ATGCCTTCCAGATTTACTAAGACTAGAAAGCACAGAGGTCACGTCTCAGCCGGTAAGGGTAGAATCGGTAAGCACAGAAAGCATCCCGGTGGTAGAGGTAAGGCTGGTGGTCAACATCATCACAGAATTAACTTAGATAAATACCATCCAGGTTATTTCGGTAAGGTTGGTATGAGATACTTCCACAAGCAACAAGGTCATTTCTGGAAGCCAGTCTTAAACTTAGACAAGTTATGGACTTTAATCCCAGAAGAAAAGAGAGACGAATACTTAAAGAACGCCTCTGCTACTTCTGCTCCAGTTATTGACACTTTAGCTGCCGGTTACGGTAAGGTCTTAGGTAAGGGTAGAATTCCAAACGTCCCAGTTATTGTCAAGGCCAGATTCGTCTCCAAGTTA…	OK	450	YES	CAA	Glutamine	Glutamine (CAA)
yHAB133_kazachstania_unispora_160519.g001941.m1	ATGCCTTCCAGATTTACTAAGACTAGAAAGCACAGAGGTCACGTCTCAGCCGGTAAGGGTAGAATCGGTAAGCACAGAAAGCATCCCGGTGGTAGAGGTAAGGCTGGTGGTCAACATCATCACAGAATTAACTTAGATAAATACCATCCAGGTTACTTCGGTAAGGTTGGTATGAGATACTTCCACAAGCAACAAGGTCATTTCTGGAAGCCAGTCTTAAACTTAGATAAGTTATGGACTTTAATCCCAGAAGAAAAGAGAGATGAATACTTAAAGAACTCCTCTGCTACTTCTGCTCCAGTTATTGACACTTTAGCTGCCGGTTACGGTAAGGTCTTAGGTAAGGGTAGAATTCCAAACGTCCCAGTTATCGTTAAGGCTAGATTCGTTTCCAAGTTA…	ATGCCTTCCAGATTTACTAAGACTAGAAAGCACAGAGGTCACGTCTCAGCCGGTAAGGGTAGAATCGGTAAGCACAGAAAGCATCCCGGTGGTAGAGGTAAGGCTGGTGGTCAACATCATCACAGAATTAACTTAGATAAATACCATCCAGGTTACTTCGGTAAGGTTGGTATGAGATACTTCCACAAGCAACAAGGTCATTTCTGGAAGCCAGTCTTAAACTTAGATAAGTTATGGACTTTAATCCCAGAAGAAAAGAGAGATGAATACTTAAAGAACTCCTCTGCTACTTCTGCTCCAGTTATTGACACTTTAGCTGCCGGTTACGGTAAGGTCTTAGGTAAGGGTAGAATTCCAAACGTCCCAGTTATCGTTAAGGCTAGATTCGTTTCCAAGTTA…	OK	450	YES	CAA	Glutamine	Glutamine (CAA)
yHAB165_kazachstania_aquatica_160519.g003258.m1	ATGCCTTCCAGATTTACTAAGACTAGAAAGCACAGAGGTCACGTCTCAGCCGGTAAGGGTAGAATCGGTAAGCACAGAAAGCACCCCGGTGGTAGAGGTAAGGCTGGTGGTCAACATCATCACAGAATCAACTTAGATAAGTACCATCCAGGTTACTTCGGTAAGGTTGGTATGAGATACTTCCACAAGCAACAAGGTCACTTCTGGAAGCCAGTCTTAAACTTAGATAAGTTATGGACTTTAGTCCCAGAAGAAAAGAGAGACGAATACTTAAAGAACGCCTCTGCTACTTCTGCTCCAGTTATTGACACTTTAGCTGCCGGTTACGGTAAGGTCTTAGGTAAGGGTAGAATTCCAAACGTCCCAGTTATCGTTAAGGCTAGATTTGTTTCCAAGTTA…	ATGCCTTCCAGATTTACTAAGACTAGAAAGCACAGAGGTCACGTCTCAGCCGGTAAGGGTAGAATCGGTAAGCACAGAAAGCACCCCGGTGGTAGAGGTAAGGCTGGTGGTCAACATCATCACAGAATCAACTTAGATAAGTACCATCCAGGTTACTTCGGTAAGGTTGGTATGAGATACTTCCACAAGCAACAAGGTCACTTCTGGAAGCCAGTCTTAAACTTAGATAAGTTATGGACTTTAGTCCCAGAAGAAAAGAGAGACGAATACTTAAAGAACGCCTCTGCTACTTCTGCTCCAGTTATTGACACTTTAGCTGCCGGTTACGGTAAGGTCTTAGGTAAGGGTAGAATTCCAAACGTCCCAGTTATCGTTAAGGCTAGATTTGTTTCCAAGTTA…	OK	450	YES	CAA	Glutamine	Glutamine (CAA)
yHMPu5000034894_naumovozyma_baii_190924_g004096.m1	ATGCCTTCCAGATTTACTAAGACAAGAAAGCACAGAGGTCACGTCTCAGCCGGTAAGGGTAGAATCGGTAAGCACAGAAAGCACCCCGGTGGTAGAGGTATGGCCGGTGGTTTCCATCACCACAGAACTAACTTGGATAAATACCATCCAGGTTACTTTGGTAAGGTCGGTATGAGATACTTCCACAAGCAACAAGCTCATTTCTGGAAGCCAGTGTTGAACTTGGACAAGTTATGGACTTTGATCCCAGAAGAAAAGAGAGATGAATACTTGCAATCTTCTTCCAAGTCTGCTGCTCCAGTTATTGACACTTTGGCTGCTGGTTACGGTAAGGTCTTGGGTAAGGGTAGAATTCCAAACGTCCCAGTTATCGTTAAGGCTAGATTCGTCTCCAAGTTG…	ATGCCTTCCAGATTTACTAAGACAAGAAAGCACAGAGGTCACGTCTCAGCCGGTAAGGGTAGAATCGGTAAGCACAGAAAGCACCCCGGTGGTAGAGGTATGGCCGGTGGTTTCCATCACCACAGAACTAACTTGGATAAATACCATCCAGGTTACTTTGGTAAGGTCGGTATGAGATACTTCCACAAGCAACAAGCTCATTTCTGGAAGCCAGTGTTGAACTTGGACAAGTTATGGACTTTGATCCCAGAAGAAAAGAGAGATGAATACTTGCAATCTTCTTCCAAGTCTGCTGCTCCAGTTATTGACACTTTGGCTGCTGGTTACGGTAAGGTCTTGGGTAAGGGTAGAATTCCAAACGTCCCAGTTATCGTTAAGGCTAGATTCGTCTCCAAGTTG…	OK	450	YES	TTC	Phenylalanine	Phenylalanine (TTC)
saccharomyces_uvarum_g004563.m10	ATGCCTTCCAGATTCACTAAGACTAGAAAGCACAGAGGTCACGTCTCAGCCGGTAAAGGTCGTGTCGGTAAGCACAGAAAGCATCCCGGTGGTAGAGGTATGGCCGGTGGTCAACATCATCACAGAATTAACATGGATAAATACCATCCAGGTTATTTCGGTAAGGTCGGTATGAGATACTTCCACAAGCAACAAGCTCATTTCTGGAAGCCAGTCTTGAACTTGGACAAATTGTGGACTTTGATCCCAGAAGACAAGAGAGACCAATACTTGAAGTCTGCTTCCAAGGAATCTGCTCCAGTCATTGACACCTTGGCTGCCGGTTACGGTAAGATCTTGGGTAAGGGTAGAATTCCAAACGTCCCAGTTATCGTCAAGGCCAGATTTGTCTCCAAGTTG…	ATGCCTTCCAGATTCACTAAGACTAGAAAGCACAGAGGTCACGTCTCAGCCGGTAAAGGTCGTGTCGGTAAGCACAGAAAGCATCCCGGTGGTAGAGGTATGGCCGGTGGTCAACATCATCACAGAATTAACATGGATAAATACCATCCAGGTTATTTCGGTAAGGTCGGTATGAGATACTTCCACAAGCAACAAGCTCATTTCTGGAAGCCAGTCTTGAACTTGGACAAATTGTGGACTTTGATCCCAGAAGACAAGAGAGACCAATACTTGAAGTCTGCTTCCAAGGAATCTGCTCCAGTCATTGACACCTTGGCTGCCGGTTACGGTAAGATCTTGGGTAAGGGTAGAATTCCAAACGTCCCAGTTATCGTCAAGGCCAGATTTGTCTCCAAGTTG…	OK	450	YES	CAA	Glutamine	Glutamine (CAA)
saccharomyces_eubayanus_g004561.m11	ATGCCTTCCAGATTCACTAAGACTAGAAAGCACAGAGGTCACGTCTCAGCCGGTAAAGGTCGTGTCGGTAAGCACAGAAAGCATCCCGGTGGTAGAGGTATGGCCGGTGGTCAACATCATCACAGAATTAACATGGATAAATACCATCCAGGTTACTTCGGTAAGGTCGGTATGAGATACTTCCACAAGCAACAAGCTCATTTCTGGAAGCCAGTCTTGAACTTGGACAAATTGTGGACTTTGATCCCAGAAGACAAGAGAGACCAATACTTGAAGTCTGCTTCCAAGGAATCTGCTCCAGTCATTGACACCTTGGCTGCCGGTTACGGTAAGATCTTGGGTAAGGGTAGAATTCCAAACGTCCCAGTTATCGTCAAGGCCAGATTTGTCTCCAAGTTG…	ATGCCTTCCAGATTCACTAAGACTAGAAAGCACAGAGGTCACGTCTCAGCCGGTAAAGGTCGTGTCGGTAAGCACAGAAAGCATCCCGGTGGTAGAGGTATGGCCGGTGGTCAACATCATCACAGAATTAACATGGATAAATACCATCCAGGTTACTTCGGTAAGGTCGGTATGAGATACTTCCACAAGCAACAAGCTCATTTCTGGAAGCCAGTCTTGAACTTGGACAAATTGTGGACTTTGATCCCAGAAGACAAGAGAGACCAATACTTGAAGTCTGCTTCCAAGGAATCTGCTCCAGTCATTGACACCTTGGCTGCCGGTTACGGTAAGATCTTGGGTAAGGGTAGAATTCCAAACGTCCCAGTTATCGTCAAGGCCAGATTTGTCTCCAAGTTG…	OK	450	YES	CAA	Glutamine	Glutamine (CAA)
saccharomyces_jurei_g002312.m1	ATGCCTTCCAGATTCACTAAGACTAGAAAGCACAGAGGTCACGTCTCAGCCGGTAAAGGTCGTGTCGGTAAGCACAGAAAGCATCCCGGTGGTAGAGGTATGGCCGGTGGTCAACATCACCACAGAATTAACATGGATAAGTACCATCCAGGTTATTTCGGTAAGGTTGGTATGAGATACTTCCACAAGCAACAAGCTCATTTCTGGAAGCCAGTTTTGAACTTGGACAAATTGTGGACCTTGATCCCAGAGGACAAGAGAGACCAATACTTGAAGTCTGCTTCCAAGGAAACTGCTCCAGTCATTGACACCTTGGCTGCCGGTTACGGTAAGATCTTGGGTAAGGGTAGAATTCCAAACGTCCCAGTTATCGTCAAGGCTAGATTCGTCTCCAAGTTG…	ATGCCTTCCAGATTCACTAAGACTAGAAAGCACAGAGGTCACGTCTCAGCCGGTAAAGGTCGTGTCGGTAAGCACAGAAAGCATCCCGGTGGTAGAGGTATGGCCGGTGGTCAACATCACCACAGAATTAACATGGATAAGTACCATCCAGGTTATTTCGGTAAGGTTGGTATGAGATACTTCCACAAGCAACAAGCTCATTTCTGGAAGCCAGTTTTGAACTTGGACAAATTGTGGACCTTGATCCCAGAGGACAAGAGAGACCAATACTTGAAGTCTGCTTCCAAGGAAACTGCTCCAGTCATTGACACCTTGGCTGCCGGTTACGGTAAGATCTTGGGTAAGGGTAGAATTCCAAACGTCCCAGTTATCGTCAAGGCTAGATTCGTCTCCAAGTTG…	OK	450	YES	CAA	Glutamine	Glutamine (CAA)
saccharomyces_mikatae_g004808.m1	ATGCCTTCCAGATTCACTAAGACTAGAAAGCACAGAGGTCACGTCTCAGCCGGTAAAGGTCGTGTCGGTAAGCACAGAAAGCATCCCGGTGGTAGAGGTATGGCCGGTGGTCAACATCACCACAGAATTAACATGGATAAGTACCATCCAGGTTATTTCGGTAAGGTTGGTATGAGATACTTCCACAAGCAACAAGCTCATTTCTGGAAGCCAGTTTTGAACTTGGACAAATTGTGGACCTTGATCCCAGAAGACAAAAGAGACCAATACTTGAAGTCTGCTTCTAAGGAAACTGCTCCAGTTATTGACACCTTGGCTGCCGGTTACGGTAAGATCTTGGGTAAGGGTAGAATTCCAAACGTACCAGTTATCGTCAAGGCTAGATTCGTCTCCAAGTTA…	ATGCCTTCCAGATTCACTAAGACTAGAAAGCACAGAGGTCACGTCTCAGCCGGTAAAGGTCGTGTCGGTAAGCACAGAAAGCATCCCGGTGGTAGAGGTATGGCCGGTGGTCAACATCACCACAGAATTAACATGGATAAGTACCATCCAGGTTATTTCGGTAAGGTTGGTATGAGATACTTCCACAAGCAACAAGCTCATTTCTGGAAGCCAGTTTTGAACTTGGACAAATTGTGGACCTTGATCCCAGAAGACAAAAGAGACCAATACTTGAAGTCTGCTTCTAAGGAAACTGCTCCAGTTATTGACACCTTGGCTGCCGGTTACGGTAAGATCTTGGGTAAGGGTAGAATTCCAAACGTACCAGTTATCGTCAAGGCTAGATTCGTCTCCAAGTTA…	OK	450	YES	CAA	Glutamine	Glutamine (CAA)
saccharomyces_kudriavzevii_g004594.m10	ATGCCTTCCAGATTCACTAAGACTAGAAAGCACAGAGGTCACGTCTCAGCCGGTAAAGGTCGTGTCGGTAAGCACAGAAAGCATCCCGGTGGTAGAGGTATGGCCGGTGGTCAACATCACCACAGAATTAACATGGATAAATACCATCCAGGTTACTTCGGTAAGGTCGGTATGAGATACTTCCACAAGCAACAAGCTCATTTCTGGAAGCCAGTCTTGAACTTGGACAAATTGTGGTCCTTGATTCCAGAAGACAAGAGAGACCAATACTTGAAGTCTGCTTCCAAGGAAACTGCTCCAGTTATTGACACCTTGGCTGCCGGTTACGGTAAGATCTTGGGTAAGGGTAGACTTCCAAACGTCCCTGTCATTGTCAAGGCTAGATTCGTCTCCAAGTTG…	ATGCCTTCCAGATTCACTAAGACTAGAAAGCACAGAGGTCACGTCTCAGCCGGTAAAGGTCGTGTCGGTAAGCACAGAAAGCATCCCGGTGGTAGAGGTATGGCCGGTGGTCAACATCACCACAGAATTAACATGGATAAATACCATCCAGGTTACTTCGGTAAGGTCGGTATGAGATACTTCCACAAGCAACAAGCTCATTTCTGGAAGCCAGTCTTGAACTTGGACAAATTGTGGTCCTTGATTCCAGAAGACAAGAGAGACCAATACTTGAAGTCTGCTTCCAAGGAAACTGCTCCAGTTATTGACACCTTGGCTGCCGGTTACGGTAAGATCTTGGGTAAGGGTAGACTTCCAAACGTCCCTGTCATTGTCAAGGCTAGATTCGTCTCCAAGTTG…	OK	450	YES	CAA	Glutamine	Glutamine (CAA)
saccharomyces_arboricola_g004626.m11	ATGCCTTCCAGATTCACTAAGACTAGAAAGCACAGAGGTCACGTCTCAGCCGGTAAAGGTCGTGTCGGTAAGCACAGAAAGCATCCCGGTGGTAGAGGTATGGCCGGTGGTCAACACCATCACAGAATTAACATGGATAAATACCATCCAGGTTACTTCGGTAAGGTTGGTATGAGATACTTCCACAAGCAACAAGCTCATTTCTGGAAGCCAGTTTTGAACTTGGACAAATTGTGGACTTTGATCCCAGAAGACAAGAGAGACCAATACTTGAAGTCTGCTTCCAAGGAAACTGCTCCAGTTATTGACACCTTGGCTGCCGGTTACGGTAAGATCTTGGGTAAGGGTAGAATTCCAAACGTCCCAGTCATTGTCAAGGCTAGATTCGTCTCCAAGTTG…	ATGCCTTCCAGATTCACTAAGACTAGAAAGCACAGAGGTCACGTCTCAGCCGGTAAAGGTCGTGTCGGTAAGCACAGAAAGCATCCCGGTGGTAGAGGTATGGCCGGTGGTCAACACCATCACAGAATTAACATGGATAAATACCATCCAGGTTACTTCGGTAAGGTTGGTATGAGATACTTCCACAAGCAACAAGCTCATTTCTGGAAGCCAGTTTTGAACTTGGACAAATTGTGGACTTTGATCCCAGAAGACAAGAGAGACCAATACTTGAAGTCTGCTTCCAAGGAAACTGCTCCAGTTATTGACACCTTGGCTGCCGGTTACGGTAAGATCTTGGGTAAGGGTAGAATTCCAAACGTCCCAGTCATTGTCAAGGCTAGATTCGTCTCCAAGTTG…	OK	450	YES	CAA	Glutamine	Glutamine (CAA)
saccharomyces_paradoxus_g004664.m1	ATGCCTTCCAGATTCACTAAGACTAGAAAGCACAGAGGTCACGTCTCAGCCGGTAAAGGTCGTGTCGGTAAGCACAGAAAGCACCCCGGTGGTAGAGGTATGGCCGGTGGTCAACATCACCACAGAATTAACATGGATAAATACCATCCAGGTTATTTCGGTAAGGTTGGTATGAGATACTTCCACAAGCAACAAGCTCATTTCTGGAAGCCAGTCTTGAATTTGGACAAATTGTGGACTTTGATCCCAGAAGACAAGAGAGACCAATACTTGAAGTCTGCTTCCAAGGAGACTGCTCCAGTTATTGACACCTTGGCTGCCGGTTACGGTAAGATTTTGGGTAAGGGTAGAATTCCAAACGTCCCAGTTATTGTCAAAGCTAGATTCGTCTCCAAGTTG…	ATGCCTTCCAGATTCACTAAGACTAGAAAGCACAGAGGTCACGTCTCAGCCGGTAAAGGTCGTGTCGGTAAGCACAGAAAGCACCCCGGTGGTAGAGGTATGGCCGGTGGTCAACATCACCACAGAATTAACATGGATAAATACCATCCAGGTTATTTCGGTAAGGTTGGTATGAGATACTTCCACAAGCAACAAGCTCATTTCTGGAAGCCAGTCTTGAATTTGGACAAATTGTGGACTTTGATCCCAGAAGACAAGAGAGACCAATACTTGAAGTCTGCTTCCAAGGAGACTGCTCCAGTTATTGACACCTTGGCTGCCGGTTACGGTAAGATTTTGGGTAAGGGTAGAATTCCAAACGTCCCAGTTATTGTCAAAGCTAGATTCGTCTCCAAGTTG…	OK	450	YES	CAA	Glutamine	Glutamine (CAA)
saccharomyces_cerevisiae_g004751.m16	ATGCCTTCCAGATTCACTAAGACTAGAAAGCACAGAGGTCACGTCTCAGCCGGTAAAGGTCGTATCGGTAAGCACAGAAAGCACCCCGGTGGTAGAGGTATGGCCGGTGGTCAACATCACCACAGAATTAACATGGATAAATACCATCCAGGTTATTTCGGTAAGGTTGGTATGAGATACTTCCACAAGCAACAAGCTCATTTCTGGAAGCCAGTCTTGAACTTGGACAAATTGTGGACATTGATCCCAGAAGACAAGAGAGACCAATACTTGAAATCTGCTTCTAAGGAAACTGCTCCAGTTATTGACACTTTGGCAGCCGGTTACGGTAAGATCTTGGGTAAGGGTAGAATTCCAAATGTTCCAGTTATCGTCAAAGCTAGATTCGTCTCCAAGTTG…	ATGCCTTCCAGATTCACTAAGACTAGAAAGCACAGAGGTCACGTCTCAGCCGGTAAAGGTCGTATCGGTAAGCACAGAAAGCACCCCGGTGGTAGAGGTATGGCCGGTGGTCAACATCACCACAGAATTAACATGGATAAATACCATCCAGGTTATTTCGGTAAGGTTGGTATGAGATACTTCCACAAGCAACAAGCTCATTTCTGGAAGCCAGTCTTGAACTTGGACAAATTGTGGACATTGATCCCAGAAGACAAGAGAGACCAATACTTGAAATCTGCTTCTAAGGAAACTGCTCCAGTTATTGACACTTTGGCAGCCGGTTACGGTAAGATCTTGGGTAAGGGTAGAATTCCAAATGTTCCAGTTATCGTCAAAGCTAGATTCGTCTCCAAGTTG…	OK	450	YES	CAA	Glutamine	Glutamine (CAA)
yHDO586_kazachstania_humatica_180604.g005563.m1	ATGCCTTCCAGATTCACTAAAACTAGAAAGCACAGAGGTCACGTCTCAGCCGGTAAGGGTAGAATTGGTAAACACAGAAAGCACCCTGGTGGTAGAGGTAAAGCTGGTGGTCAACATCATCACAGAATTAACATGGATAAATACCATCCAGGTTACTTCGGTAAGGTTGGTATGAGATACTTCCACAAGCAACAAGGTCATTTCTGGAAACCAGTCTTAAACTTAGACAAGTTATGGACTTTAGTCCCAGAAGAAAAGAGAGATGAATACTTAAAATCTGCTTCTGCTTCTTCTGCTCCAGTTATTGACACTTTAGCTGCCGGTTACGGTAAAGTCTTAGGTAAGGGTAGAATTCCAAACGTTCCAGTTATCGTTAAGGCTAGATTCGTTTCTAAATTA…	ATGCCTTCCAGATTCACTAAAACTAGAAAGCACAGAGGTCACGTCTCAGCCGGTAAGGGTAGAATTGGTAAACACAGAAAGCACCCTGGTGGTAGAGGTAAAGCTGGTGGTCAACATCATCACAGAATTAACATGGATAAATACCATCCAGGTTACTTCGGTAAGGTTGGTATGAGATACTTCCACAAGCAACAAGGTCATTTCTGGAAACCAGTCTTAAACTTAGACAAGTTATGGACTTTAGTCCCAGAAGAAAAGAGAGATGAATACTTAAAATCTGCTTCTGCTTCTTCTGCTCCAGTTATTGACACTTTAGCTGCCGGTTACGGTAAAGTCTTAGGTAAGGGTAGAATTCCAAACGTTCCAGTTATCGTTAAGGCTAGATTCGTTTCTAAATTA…	OK	450	YES	CAA	Glutamine	Glutamine (CAA)
yHAB154_kazachstania_transvaalensis_160519_g001774.m1	ATGCCTTCCAGATTCACTAAAACTAGAAAGCACAGAGGTCACGTCTCAGCCGGTAAGGGTAGAATTGGTAAACACAGAAAGCACCCTGGTGGTAGAGGTAAAGCTGGTGGTCAACATCATCACAGAATTAACATGGATAAATACCATCCAGGTTACTTCGGTAAGGTTGGTATGAGATACTTCCACAAACAACAAGGTCATTTCTGGAAACCAGTCTTAAACTTAGACAAGTTATGGACTTTAGTTCCAGAAGAAAAGAGAGATGAATACTTAAAATCTGCTTCTGCTTCTTCTGCTCCAGTTATTGACACTTTAGCTGCCGGTTACGGTAAGGTCTTAGGTAAGGGTAGAATTCCAAACGTCCCAGTTATCGTTAAGGCTAGATTTGTTTCTAAGTTA…	ATGCCTTCCAGATTCACTAAAACTAGAAAGCACAGAGGTCACGTCTCAGCCGGTAAGGGTAGAATTGGTAAACACAGAAAGCACCCTGGTGGTAGAGGTAAAGCTGGTGGTCAACATCATCACAGAATTAACATGGATAAATACCATCCAGGTTACTTCGGTAAGGTTGGTATGAGATACTTCCACAAACAACAAGGTCATTTCTGGAAACCAGTCTTAAACTTAGACAAGTTATGGACTTTAGTTCCAGAAGAAAAGAGAGATGAATACTTAAAATCTGCTTCTGCTTCTTCTGCTCCAGTTATTGACACTTTAGCTGCCGGTTACGGTAAGGTCTTAGGTAAGGGTAGAATTCCAAACGTCCCAGTTATCGTTAAGGCTAGATTTGTTTCTAAGTTA…	OK	450	YES	CAA	Glutamine	Glutamine (CAA)
yHAB166_kazachstania_yakushimaensis_160519.g003928.m1	ATGCCTTCCAGATTCACTAAAACTAGAAAGCACAGAGGTCACGTCTCAGCCGGTAAGGGTAGAATTGGTAAACACAGAAAGCACCCGGGTGGTAGAGGTAAAGCTGGTGGTCAACATCATCACAGAATTAACATGGATAAATACCATCCAGGTTACTTCGGTAAGGTTGGTATGAGATACTTCCACAAGCAACAAGGTCATTTCTGGAAGCCAGTCTTAAACTTAGATAAGTTATGGACTTTAGTCCCAGAAGAAAAGAGAGATGAATACTTAAAGTCTGCTTCTGCTTCTTCTGCTCCAGTTATTGACACTTTAGCTGCCGGTTACGGTAAGGTCTTAGGTAAGGGTAGAATTCCAAACGTCCCAGTTATCGTTAAGGCTAGATTCGTTTCTAAGTTA…	ATGCCTTCCAGATTCACTAAAACTAGAAAGCACAGAGGTCACGTCTCAGCCGGTAAGGGTAGAATTGGTAAACACAGAAAGCACCCGGGTGGTAGAGGTAAAGCTGGTGGTCAACATCATCACAGAATTAACATGGATAAATACCATCCAGGTTACTTCGGTAAGGTTGGTATGAGATACTTCCACAAGCAACAAGGTCATTTCTGGAAGCCAGTCTTAAACTTAGATAAGTTATGGACTTTAGTCCCAGAAGAAAAGAGAGATGAATACTTAAAGTCTGCTTCTGCTTCTTCTGCTCCAGTTATTGACACTTTAGCTGCCGGTTACGGTAAGGTCTTAGGTAAGGGTAGAATTCCAAACGTCCCAGTTATCGTTAAGGCTAGATTCGTTTCTAAGTTA…	OK	450	YES	CAA	Glutamine	Glutamine (CAA)
yHAB136_kazachstania_bromeliacearum_160519_g000417.m1	ATGCCTTCCAGATTCACTAAAACTAGAAAGCACAGAGGTCACGTCTCAGCCGGTAACGGTAGAATCGGTAAGCACAGAAAGCACCCGGGTGGTAGAGGTAGAGCTGGTGGTCAACATCATCACAGAATTAACTTGGATAAATACCATCCAGGTTACTTCGGTAAGGTTGGTATGAGATACTTCCACAAGCAACAAGCTCATTTCTGGAAGCCAGTTTTGAACTTGGACAAATTGTGGACTTTGATCCCAGAAGAAAAGAGAGACGAATACATGAAGTCCTCTTCTACTTCTTCTGCTCCAGTTATCGACACTTTGGCTGCCGGTTACGGTAAGGTCTTAGGTAAGGGTAGAATTCCAAACGTCCCAGTTATCGTTAAGGCTAGATTCGTTTCTAAGTTA…	ATGCCTTCCAGATTCACTAAAACTAGAAAGCACAGAGGTCACGTCTCAGCCGGTAACGGTAGAATCGGTAAGCACAGAAAGCACCCGGGTGGTAGAGGTAGAGCTGGTGGTCAACATCATCACAGAATTAACTTGGATAAATACCATCCAGGTTACTTCGGTAAGGTTGGTATGAGATACTTCCACAAGCAACAAGCTCATTTCTGGAAGCCAGTTTTGAACTTGGACAAATTGTGGACTTTGATCCCAGAAGAAAAGAGAGACGAATACATGAAGTCCTCTTCTACTTCTTCTGCTCCAGTTATCGACACTTTGGCTGCCGGTTACGGTAAGGTCTTAGGTAAGGGTAGAATTCCAAACGTCCCAGTTATCGTTAAGGCTAGATTCGTTTCTAAGTTA…	OK	450	YES	CAA	Glutamine	Glutamine (CAA)
yHMPu5000034706_Kazachstania_psychrophila_SPADES.g002335.m1	ATGCCTTCCAGATTCACTAAAACTAGAAAGCACAGAGGTCACGTCTCAGCCGGTAAAGGTCGTGTCGGTAAGCACAGAAAGCATCCAGGTGGTAGAGGTAAGGCCGGTGGTCTACAACACCACAGAGCTAACATGGATAAATACCATCCAGGTTACTTCGGTAAGGTCGGTATGAGATACTTCCACAAGCAACAAGCTCATTTCTGGAAGCCAGTCTTAAACTTAGACAAGTTATGGAGTTTAATCCCAGAAGACAAGAGAGACGACTACTTAAAGTCTTCTTCTGCTTCTGCTGCTCCAGTCATTGACACCTTAGCTGCCGGTTACGGTAAGGTCTTAGGTAAGGGTAAGATTCCAAACGTCCCAGTCATTGTCAAGGCCAGATTTGTTTCTAAGTTA…	ATGCCTTCCAGATTCACTAAAACTAGAAAGCACAGAGGTCACGTCTCAGCCGGTAAAGGTCGTGTCGGTAAGCACAGAAAGCATCCAGGTGGTAGAGGTAAGGCCGGTGGTCTACAACACCACAGAGCTAACATGGATAAATACCATCCAGGTTACTTCGGTAAGGTCGGTATGAGATACTTCCACAAGCAACAAGCTCATTTCTGGAAGCCAGTCTTAAACTTAGACAAGTTATGGAGTTTAATCCCAGAAGACAAGAGAGACGACTACTTAAAGTCTTCTTCTGCTTCTGCTGCTCCAGTCATTGACACCTTAGCTGCCGGTTACGGTAAGGTCTTAGGTAAGGGTAAGATTCCAAACGTCCCAGTCATTGTCAAGGCCAGATTTGTTTCTAAGTTA…	OK	450	YES	CTA	Leucine1	Leucine1 (CTA)
yHAB144_kazachstania_jainica_160519.haplomerger2.g005051.m1	ATGCCTTCCAGATTCACTAAAACTAGAAAACACAGAGGTCACGTCTCAGCCGGTAAGGGTAGAATCGGTAAGCACAGAAAGCATCCCGGTGGTAGAGGTAAAGCTGGTGGTCAACATCATCACAGAATCAACATGGATAAATACCATCCAGGTTACTTCGGTAAGGTTGGTATGAGATACTTCCACAAACAACAAGGTCATTTCTGGAAGCCAGTCTTAAACTTAGACAAGTTATGGACTTTAATCCCAGAAGAAAAGAGAGATGAATACTTAAAGTCTGCTTCTACTTCTTCTGCTCCAGTTATTGACACTTTAGCTGCCGGTTACGGTAAGGTCTTAGGTAAGGGTAGAATTCCAAACGTCCCAGTTATCGTTAAGGCTAGATTCGTTTCTAAGTTA…	ATGCCTTCCAGATTCACTAAAACTAGAAAACACAGAGGTCACGTCTCAGCCGGTAAGGGTAGAATCGGTAAGCACAGAAAGCATCCCGGTGGTAGAGGTAAAGCTGGTGGTCAACATCATCACAGAATCAACATGGATAAATACCATCCAGGTTACTTCGGTAAGGTTGGTATGAGATACTTCCACAAACAACAAGGTCATTTCTGGAAGCCAGTCTTAAACTTAGACAAGTTATGGACTTTAATCCCAGAAGAAAAGAGAGATGAATACTTAAAGTCTGCTTCTACTTCTTCTGCTCCAGTTATTGACACTTTAGCTGCCGGTTACGGTAAGGTCTTAGGTAAGGGTAGAATTCCAAACGTCCCAGTTATCGTTAAGGCTAGATTCGTTTCTAAGTTA…	OK	450	YES	CAA	Glutamine	Glutamine (CAA)
yHMPu5000037210_Kazachstania_jinghongensis_SPADES.g001835.m1	ATGCCTTCCAGATTCACTAAAACCAGAAAGCACAGAGGTCACGTCTCAGCCGGTAAGGGTCGTATCGGTAAGCACAGAAAGCACCCAGGTGGTAGAGGTAAGGCCGGTGGTCAACACCACCACAGAATTAACATGGATAAGTACCATCCAGGTTACTTCGGTAAGGTCGGTATGAGATACTTCCACAAGCAACAATTACACTTCTGGAAGCCAGTCTTAAACTTAGACAAGTTATGGACTTTAGTTCCAGAAGAAAAGAGAGACGAATACATGAAGAACTCTACTGCTGCTTCTGCCCCAGTCATTGACACCTTAGCTGCCGGTTACGGTAAGGTCTTAGGTAAGGGTAGATTACCAACTGTTCCAGTTATCGTCAAGGCTAGATTCGTTTCTAAGTTA…	ATGCCTTCCAGATTCACTAAAACCAGAAAGCACAGAGGTCACGTCTCAGCCGGTAAGGGTCGTATCGGTAAGCACAGAAAGCACCCAGGTGGTAGAGGTAAGGCCGGTGGTCAACACCACCACAGAATTAACATGGATAAGTACCATCCAGGTTACTTCGGTAAGGTCGGTATGAGATACTTCCACAAGCAACAATTACACTTCTGGAAGCCAGTCTTAAACTTAGACAAGTTATGGACTTTAGTTCCAGAAGAAAAGAGAGACGAATACATGAAGAACTCTACTGCTGCTTCTGCCCCAGTCATTGACACCTTAGCTGCCGGTTACGGTAAGGTCTTAGGTAAGGGTAGATTACCAACTGTTCCAGTTATCGTCAAGGCTAGATTCGTTTCTAAGTTA…	OK	450	YES	CAA	Glutamine	Glutamine (CAA)
yHAB142_kazachstania_gamospora_170307.haplomerger2.g005342.m1	ATGCCTTCCAGATTCACTAAAACCAGAAAGCACAGAGGTCACGTCTCAGCCGGTAAAGGTCGTATCGGTAAACACAGAAAGCATCCGGGTGGTAGAGGTAAAGCCGGTGGTTTACAACACCACAGAATCAACATGGATAAATACCATCCAGGTTACTTCGGTAAAGTTGGTATGAGATACTTCCATAAACAACAAGGTCATTTCTGGAAACCAGTCTTAAACTTAGATAAATTATGGAGTTTAGTTCCAGAAGAAAAAAGAGATGATTACTTAAAATCTTCTTCCGCTTCTTCTGCTCCAGTTATTGACACTTTAGCTGCCGGTTACGGTAAAGTTTTAGGTAAAGGTAGAATTCCAAACGTTCCAGTTATTGTTAAAGCTAGATTCGTTTCTAAATTA…	ATGCCTTCCAGATTCACTAAAACCAGAAAGCACAGAGGTCACGTCTCAGCCGGTAAAGGTCGTATCGGTAAACACAGAAAGCATCCGGGTGGTAGAGGTAAAGCCGGTGGTTTACAACACCACAGAATCAACATGGATAAATACCATCCAGGTTACTTCGGTAAAGTTGGTATGAGATACTTCCATAAACAACAAGGTCATTTCTGGAAACCAGTCTTAAACTTAGATAAATTATGGAGTTTAGTTCCAGAAGAAAAAAGAGATGATTACTTAAAATCTTCTTCCGCTTCTTCTGCTCCAGTTATTGACACTTTAGCTGCCGGTTACGGTAAAGTTTTAGGTAAAGGTAGAATTCCAAACGTTCCAGTTATTGTTAAAGCTAGATTCGTTTCTAAATTA…	OK	450	YES	TTA	Leucine2	Leucine2 (TTA)
yHAB138_kazachstania_lodderae_160519.g002864.m1	ATGCCTTCCAGATTCACTAAAACCAGAAAGCACAGAGGTCACGTCTCAGCCGGTAAAGGTCGTATCGGTAAACACAGAAAGCATCCCGGTGGTAGAGGTAAGGCCGGTGGTCTACAACACCACAGAATTAACATGGATAAATACCATCCAGGTTACTTCGGTAAGGTCGGTATGAGATACTTCCACAAGCAACAAGCTCATTTCTGGAAGCCAGTCTTAAACTTAGACAAGTTATGGACTTTGATCCCAGAAGAAAAGAGAGATGAATTCTTAAAGTCTTCTACTCCAGCTTCTGCTCCAGTCATCGACACTTTAGCTGCCGGTTACGGTAAGGTCTTAGGTAAGGGTAAATTACCAAATGTTCCAGTTATCGTTAAGGCTAGATTTGTTTCTAAATTA…	ATGCCTTCCAGATTCACTAAAACCAGAAAGCACAGAGGTCACGTCTCAGCCGGTAAAGGTCGTATCGGTAAACACAGAAAGCATCCCGGTGGTAGAGGTAAGGCCGGTGGTCTACAACACCACAGAATTAACATGGATAAATACCATCCAGGTTACTTCGGTAAGGTCGGTATGAGATACTTCCACAAGCAACAAGCTCATTTCTGGAAGCCAGTCTTAAACTTAGACAAGTTATGGACTTTGATCCCAGAAGAAAAGAGAGATGAATTCTTAAAGTCTTCTACTCCAGCTTCTGCTCCAGTCATCGACACTTTAGCTGCCGGTTACGGTAAGGTCTTAGGTAAGGGTAAATTACCAAATGTTCCAGTTATCGTTAAGGCTAGATTTGTTTCTAAATTA…	OK	450	YES	CTA	Leucine1	Leucine1 (CTA)
yHAB145_kazachstania_hellenica_160519.haplomerger2.g002174.m1	ATGCCTTCCAGATTCACTAAAACCAGAAAGCACAGAGGTCACGTCTCAGCCGGTAAAGGTCGTATCGGTAAACACAGAAAGCACCCGGGTGGTAGAGGTAAGGCCGGTGGTTTACAACACCACAGAATCAACATGGATAAATACCATCCAGGTTACTTCGGTAAGGTTGGTATGAGATACTTCCACAAACAACAAGGTCATTTCTGGAAGCCAGTCTTAAACTTAGATAAGTTATGGACTTTAATTCCAGAAGAAAAGAGAGATGAATACTTAAAGTCTTCTTCTGCTACTTCTGCTCCAGTTATTGACACTTTAGCTGCCGGTTACGGTAAAGTCTTAGGTAAGGGTAGAATTCCAAATGTTCCAGTTATCGTTAAGGCTAGATTCGTTTCCAAGTTA…	ATGCCTTCCAGATTCACTAAAACCAGAAAGCACAGAGGTCACGTCTCAGCCGGTAAAGGTCGTATCGGTAAACACAGAAAGCACCCGGGTGGTAGAGGTAAGGCCGGTGGTTTACAACACCACAGAATCAACATGGATAAATACCATCCAGGTTACTTCGGTAAGGTTGGTATGAGATACTTCCACAAACAACAAGGTCATTTCTGGAAGCCAGTCTTAAACTTAGATAAGTTATGGACTTTAATTCCAGAAGAAAAGAGAGATGAATACTTAAAGTCTTCTTCTGCTACTTCTGCTCCAGTTATTGACACTTTAGCTGCCGGTTACGGTAAAGTCTTAGGTAAGGGTAGAATTCCAAATGTTCCAGTTATCGTTAAGGCTAGATTCGTTTCCAAGTTA…	OK	450	YES	TTA	Leucine2	Leucine2 (TTA)
yHAB147_kazachstania_taianensis_160519.g004227.m1	ATGCCTTCCAGATTCACCAAGACTAGAAAGCACAGAGGTCACGTCTCAGCCGGTAACGGTCGTATCGGTAAGCACAGAAAGCACCCCGGTGGTAGAGGTAAGGCCGGTGGTCTACAACACCACAGAATTAACATGGATAAGTACCATCCAGGTTACTTCGGTAAGGTCGGTATGAGATACTTCCACAAGCAACAAGGTCACTTCTGGAAGCCAGTCTTGAACTTGGACAAGTTGTGGACTTTGATCCCAGAAGAAAAGAGAGACGAATACTTGAAGTCCTCTTCCACTTCTTCTGCCCCAGTCATTGACACCTTGGCTGCCGGTTACGGTAAGGTCCTAGGTAAGGGTAGAATTCCAAACGTCCCAGTCATTGTCAAGGCCAGATTCGTCTCCAAGCTA…	ATGCCTTCCAGATTCACCAAGACTAGAAAGCACAGAGGTCACGTCTCAGCCGGTAACGGTCGTATCGGTAAGCACAGAAAGCACCCCGGTGGTAGAGGTAAGGCCGGTGGTCTACAACACCACAGAATTAACATGGATAAGTACCATCCAGGTTACTTCGGTAAGGTCGGTATGAGATACTTCCACAAGCAACAAGGTCACTTCTGGAAGCCAGTCTTGAACTTGGACAAGTTGTGGACTTTGATCCCAGAAGAAAAGAGAGACGAATACTTGAAGTCCTCTTCCACTTCTTCTGCCCCAGTCATTGACACCTTGGCTGCCGGTTACGGTAAGGTCCTAGGTAAGGGTAGAATTCCAAACGTCCCAGTCATTGTCAAGGCCAGATTCGTCTCCAAGCTA…	OK	450	YES	CTA	Leucine1	Leucine1 (CTA)
yHAB161_kazachstania_sinensis_160519.g005632.m1	ATGCCTTCCAGATTAACTAAGACTAGAAAGCACAGAGGTCACGTCTCAGCCGGTAACGGTCGTATCGGTAAGCACAGAAAGCATCCAGGTGGTAGAGGTAAGGCCGGTGGTCAACACCACCACAGAATTAACATGGATAAGTACCATCCAGGTTACTTCGGTAAGGTCGGTATGAGATACTTCCACAAGCAACAAGGTCATTTCTGGAAGCCAGTCTTGAACTTGGACAAGTTGTGGACTTTGATCCCAGAAGACAAGAGAGACGAATACATCAAGTCCTCTTCCAAGAGCAGCGCCCCAGTCATTGACACTTTGGCTGCTGGTTACGGTAAGGTCTTGGGTAAGGGTAGAATTCCAAACGTCCCAGTCATTGTCAAGGCCAGATTCGTTTCCAAGCTT…	ATGCCTTCCAGATTAACTAAGACTAGAAAGCACAGAGGTCACGTCTCAGCCGGTAACGGTCGTATCGGTAAGCACAGAAAGCATCCAGGTGGTAGAGGTAAGGCCGGTGGTCAACACCACCACAGAATTAACATGGATAAGTACCATCCAGGTTACTTCGGTAAGGTCGGTATGAGATACTTCCACAAGCAACAAGGTCATTTCTGGAAGCCAGTCTTGAACTTGGACAAGTTGTGGACTTTGATCCCAGAAGACAAGAGAGACGAATACATCAAGTCCTCTTCCAAGAGCAGCGCCCCAGTCATTGACACTTTGGCTGCTGGTTACGGTAAGGTCTTGGGTAAGGGTAGAATTCCAAACGTCCCAGTCATTGTCAAGGCCAGATTCGTTTCCAAGCTT…	OK	450	YES	CAA	Glutamine	Glutamine (CAA)
kazachstania_naganishii_g001472.m1	ATGCCTTCCAGATTAACTAAGACTAGAAAGCACAGAGGTCACGTCTCAGCCGGTAACGGTCGTATCGGTAAGCACAGAAAGCATCCAGGTGGTAGAGGTAAGGCCGGTGGTCAACACCACCACAGAATTAACATGGATAAGTACCATCCAGGTTACTTCGGTAAGGTCGGTATGAGATACTTCCACAAGCAACAAGGTCATTTCTGGAAGCCAGTCTTGAACTTGGACAAGTTGTGGACTTTGATCCCAGAAGACAAGAGAGACGAATACATCAAGTCCTCTTCCAAGACCAGCGCTCCAGTCATTGACACCTTGGCCGCCGGTTACGGTAAGGTCTTGGGTAAGGGTAGAATTCCAAACGTCCCAGTCATTGTCAAGGCCAGATTCGTTTCCAAGCTT…	ATGCCTTCCAGATTAACTAAGACTAGAAAGCACAGAGGTCACGTCTCAGCCGGTAACGGTCGTATCGGTAAGCACAGAAAGCATCCAGGTGGTAGAGGTAAGGCCGGTGGTCAACACCACCACAGAATTAACATGGATAAGTACCATCCAGGTTACTTCGGTAAGGTCGGTATGAGATACTTCCACAAGCAACAAGGTCATTTCTGGAAGCCAGTCTTGAACTTGGACAAGTTGTGGACTTTGATCCCAGAAGACAAGAGAGACGAATACATCAAGTCCTCTTCCAAGACCAGCGCTCCAGTCATTGACACCTTGGCCGCCGGTTACGGTAAGGTCTTGGGTAAGGGTAGAATTCCAAACGTCCCAGTCATTGTCAAGGCCAGATTCGTTTCCAAGCTT…	OK	450	YES	CAA	Glutamine	Glutamine (CAA)
yHAB155_kazachstania_spencerorum_160519.g003794.m1	ATGCCTTCCAGATTAACTAAAACCAGAAAGCACAGAGGTCACGTCTCAGCCGGTAAAGGTCGTATCGGTAAGCACAGAAAGCATCCAGGTGGTAGAGGTAAGGCCGGTGGTCAACACCATCACAGAATTAACATGGATAAATACCATCCAGGTTACTTCGGTAAAGTCGGTATGAGATACTTCCACAAGCAACAATTACATTTCTGGAAACCAGTCTTAAACTTAGATAAGTTATGGACTTTAATCCCAGAAGAAAAGAGAGACGAATACATGAAGAACTCTTCTACTTCTTCTGCCCCAGTCATTGACACCTTAGCTGCCGGTTACGGTAAGGTCTTAGGTAAGGGTAGATTACCAACTGTTCCAGTCATTGTCAAGGCTAGATTCGTTTCTAAGTTA…	ATGCCTTCCAGATTAACTAAAACCAGAAAGCACAGAGGTCACGTCTCAGCCGGTAAAGGTCGTATCGGTAAGCACAGAAAGCATCCAGGTGGTAGAGGTAAGGCCGGTGGTCAACACCATCACAGAATTAACATGGATAAATACCATCCAGGTTACTTCGGTAAAGTCGGTATGAGATACTTCCACAAGCAACAATTACATTTCTGGAAACCAGTCTTAAACTTAGATAAGTTATGGACTTTAATCCCAGAAGAAAAGAGAGACGAATACATGAAGAACTCTTCTACTTCTTCTGCCCCAGTCATTGACACCTTAGCTGCCGGTTACGGTAAGGTCTTAGGTAAGGGTAGATTACCAACTGTTCCAGTCATTGTCAAGGCTAGATTCGTTTCTAAGTTA…	OK	450	YES	CAA	Glutamine	Glutamine (CAA)
yHAB137_kazachstania_africana_160519_g002333.m1	ATGCCTTCAAGATTTACTAAGACTAGAAAGCACAGAGGTCACGTCTCAGCCGGTAAAGGTAGAATCGGTAAGCACAGAAAGCACCCGGGTGGTAGAGGTATGGCCGGTGGTTTACACCACCACAGAACCAACTTGGATAAATACCACCCAGGTTACTTCGGTAAGGTCGGTATGAGATACTTCCACAAGCAACAAGCTCACTTCTGGAAGCCAGTCTTAAACTTAGACAAGTTATGGACTTTAGTCCCAGAAGAAAAGAGAGACGACTACTTAAAGTCCGCTTCCAAGTCCGCTGCTCCAGTCATTGACACTTTAGCTGCTGGTTACGGTAAGGTCTTAGGTAAGGGTAGAATTCCAAACGTCCCAGTCATCGTCAAGGCCAGATTCGTTTCTAAGTTA…	ATGCCTTCAAGATTTACTAAGACTAGAAAGCACAGAGGTCACGTCTCAGCCGGTAAAGGTAGAATCGGTAAGCACAGAAAGCACCCGGGTGGTAGAGGTATGGCCGGTGGTTTACACCACCACAGAACCAACTTGGATAAATACCACCCAGGTTACTTCGGTAAGGTCGGTATGAGATACTTCCACAAGCAACAAGCTCACTTCTGGAAGCCAGTCTTAAACTTAGACAAGTTATGGACTTTAGTCCCAGAAGAAAAGAGAGACGACTACTTAAAGTCCGCTTCCAAGTCCGCTGCTCCAGTCATTGACACTTTAGCTGCTGGTTACGGTAAGGTCTTAGGTAAGGGTAGAATTCCAAACGTCCCAGTCATCGTCAAGGCCAGATTCGTTTCTAAGTTA…	OK	450	YES	TTA	Leucine2	Leucine2 (TTA)
yHMPu5000034865_zygosaccharomyces_kombuchaensis_160519.g004981.m1	ATGCCTAGCAGATTCACCAAGACTAGAAAGCACAGAGGTCACATCTCAGCCGGTAACGGTCGTGTTGGTAAGCACAGAAAGCATCCCGGTGGTAGGGGTATGGCCGGTGGTCAGCACCACCACAGAACCAACTTGGATAAATTCCACCCTGGTTACTTTGGTAAGGTCGGTATGAGATACTTCCACAAGCAGAGCAACCACTTCTGGAAGCCAGTGTTGAACTTGGACAAGTTGTGGTCGTTGGTGCCAGAAGACAAGAGAGAGTATTACTTGCAGTCCTCCTCCAAGAGCTCTGCCCCAGTCATTGACACTTTGGCTGCTGGGTACGGGAAGATCTTGGGTAAGGGCAGAATCCCCCAGGTGCCCGTCATCGTCAAGGCTAGATTCGTTTCGAAATTG…	ATGCCTAGCAGATTCACCAAGACTAGAAAGCACAGAGGTCACATCTCAGCCGGTAACGGTCGTGTTGGTAAGCACAGAAAGCATCCCGGTGGTAGGGGTATGGCCGGTGGTCAGCACCACCACAGAACCAACTTGGATAAATTCCACCCTGGTTACTTTGGTAAGGTCGGTATGAGATACTTCCACAAGCAGAGCAACCACTTCTGGAAGCCAGTGTTGAACTTGGACAAGTTGTGGTCGTTGGTGCCAGAAGACAAGAGAGAGTATTACTTGCAGTCCTCCTCCAAGAGCTCTGCCCCAGTCATTGACACTTTGGCTGCTGGGTACGGGAAGATCTTGGGTAAGGGCAGAATCCCCCAGGTGCCCGTCATCGTCAAGGCTAGATTCGTTTCGAAATTG…	OK	450	YES	CAG	Glutamine	Glutamine (CAG)
yHMPu5000035669_pachysolen_tannophilus_160613.g004793.m1	ATGCCTAGCAGATTAACTAAAACTAGAAAACATAGAGGCCATGTTTCAGCCGGTAAGGGTCGTATCGGTAAACATAGAAAGCATCCGGGTGGTCGTGGTAAAGCTGGTGGTCAACATCATCACAGAACCAATATGGATAAATACCATCCAGGTTACTTTGGTAAAGTTGGTATGAGACATTTCCATAAATTAGCAAACCATGACTGGAAACCAGTTATTAACTTGGATAAATTATGGACCTTGGTACCAGAAGAAAACAGATCTGATCTGTTGAAAAACTCTTCATCTTCATCAGCTGTTGTTATTGATACTTTAGCCAATGGTTACGGTAAAGTTTTGGGTAAAGGTAGATTACCAGAAGTCCCAGTTATCGTTAAAGCAAGATATGTTTCAAAATTG…	ATGCCTAGCAGATTAACTAAAACTAGAAAACATAGAGGCCATGTTTCAGCCGGTAAGGGTCGTATCGGTAAACATAGAAAGCATCCGGGTGGTCGTGGTAAAGCTGGTGGTCAACATCATCACAGAACCAATATGGATAAATACCATCCAGGTTACTTTGGTAAAGTTGGTATGAGACATTTCCATAAATTAGCAAACCATGACTGGAAACCAGTTATTAACTTGGATAAATTATGGACCTTGGTACCAGAAGAAAACAGATCTGATCTGTTGAAAAACTCTTCATCTTCATCAGCTGTTGTTATTGATACTTTAGCCAATGGTTACGGTAAAGTTTTGGGTAAAGGTAGATTACCAGAAGTCCCAGTTATCGTTAAAGCAAGATATGTTTCAAAATTG…	OK	450	YES	CAA	Glutamine	Glutamine (CAA)
yHMPu5000038033_yamadazyma_insecticola_170912_g001252.m1	ATGCCTAGCAGATTAACTAAAACCAGAAAACATAGAGGACACGTCTCAGCCGGTAAAGGTAGAGTTGGTAAACACAGAAAGAGTCCTGGTGGTAAAGGTATGGCTGGTGGTCAACATCACCACAGAACCAACTTGGATAAATACCATCCAGGTTACTTCGGTAAAGTTGGTATGAGATACTTCCACAAACAACGTAACCACTTCTGGAGACCAGAAATCAACTTAGACAAATTATGGACTTTAGTTGAAGAATCTAAAAAAGATGAATACTTAAAATCTTCTTCCCAATCCGCTGCTCCAGTTATTGATACTTTAGCTTTCGGTTACGGTAAAGTTTTAGGTAAAGGTAGATTACCAGAAGTTCCAGTCATTGTCAAAGCTAGATTCGTTTCTAAATTA…	ATGCCTAGCAGATTAACTAAAACCAGAAAACATAGAGGACACGTCTCAGCCGGTAAAGGTAGAGTTGGTAAACACAGAAAGAGTCCTGGTGGTAAAGGTATGGCTGGTGGTCAACATCACCACAGAACCAACTTGGATAAATACCATCCAGGTTACTTCGGTAAAGTTGGTATGAGATACTTCCACAAACAACGTAACCACTTCTGGAGACCAGAAATCAACTTAGACAAATTATGGACTTTAGTTGAAGAATCTAAAAAAGATGAATACTTAAAATCTTCTTCCCAATCCGCTGCTCCAGTTATTGATACTTTAGCTTTCGGTTACGGTAAAGTTTTAGGTAAAGGTAGATTACCAGAAGTTCCAGTCATTGTCAAAGCTAGATTCGTTTCTAAATTA…	OK	450	YES	CAA	Glutamine	Glutamine (CAA)
yHMPu5000034864_zygosaccharomyces_lentus_170307.g000815.m1	ATGCCTAGCAGACTCACGAAGACTAGAAAGCACAGAGGTCACATCTCAGCCGGTTACGGTCGTGTTGGTAAGCACAGAAAGCATCCCGGTGGTAAGGGTATGGCCGGTGGTCAGCACCACCACAGAACCAACTTGGACAAGTTCCACCCTGGTTACTTCGGTAAGGTCGGTATGAGATACTTCCACAAGCAGGCTAACCACTTCTGGAAGCCAGTGTTGAACTTGGACAAATTGTGGTCGTTGGTGCCAGAAGACAAGAGAGAGCACTACTTGCAGTCCTCCTCCAAGAGCTCTGCCCCAGTCATTGACACTTTGGCTGCCGGGTACGGTAAGATCTTGGGTAAGGGCAGAATCCCCCAGGTGCCAGTCATTGTCAAGGCCAGATTCGTCTCGAAGTTG…	ATGCCTAGCAGACTCACGAAGACTAGAAAGCACAGAGGTCACATCTCAGCCGGTTACGGTCGTGTTGGTAAGCACAGAAAGCATCCCGGTGGTAAGGGTATGGCCGGTGGTCAGCACCACCACAGAACCAACTTGGACAAGTTCCACCCTGGTTACTTCGGTAAGGTCGGTATGAGATACTTCCACAAGCAGGCTAACCACTTCTGGAAGCCAGTGTTGAACTTGGACAAATTGTGGTCGTTGGTGCCAGAAGACAAGAGAGAGCACTACTTGCAGTCCTCCTCCAAGAGCTCTGCCCCAGTCATTGACACTTTGGCTGCCGGGTACGGTAAGATCTTGGGTAAGGGCAGAATCCCCCAGGTGCCAGTCATTGTCAAGGCCAGATTCGTCTCGAAGTTG…	OK	450	YES	CAG	Glutamine	Glutamine (CAG)
yHMPu5000037894_candida_hasegawae_180604_g002323.m1	ATGCCTACTCGTTTGACCAAGACTAGAAAGAGCCGTGGTCACGTCTCTGCCGGCCATGGTCGTATCGGCAAGCACCGCAAGAATCCTGGTGGTCGTGGTATGGCCGGTGGTCAGCACCACCACCGTACCAACATGGATAAGTACCACCCCGGTTACTTTGGTAAGGTCGGTTTCCGTCACTTCCACGTTCTCAAGAACCGCACTTGGAGACCTGTTATGAACCTCGACAAGCTGTGGTCTCTTGTCCCCGAGGAGTCCCGTGAGAAGTACCTCTCTTCTGCCTCCGCTACCGCTGCTCCCGTTATCGACACCCTCGCTGCCGGCTACGGTAAGGTGCTCGGTAAGGGCCGCATCCCCAACGTTCCCGTCATCGTTCGTGCTCGCTTCGTTTCCGAGTTG…	ATGCCTACTCGTTTGACCAAGACTAGAAAGAGCCGTGGTCACGTCTCTGCCGGCCATGGTCGTATCGGCAAGCACCGCAAGAATCCTGGTGGTCGTGGTATGGCCGGTGGTCAGCACCACCACCGTACCAACATGGATAAGTACCACCCCGGTTACTTTGGTAAGGTCGGTTTCCGTCACTTCCACGTTCTCAAGAACCGCACTTGGAGACCTGTTATGAACCTCGACAAGCTGTGGTCTCTTGTCCCCGAGGAGTCCCGTGAGAAGTACCTCTCTTCTGCCTCCGCTACCGCTGCTCCCGTTATCGACACCCTCGCTGCCGGCTACGGTAAGGTGCTCGGTAAGGGCCGCATCCCCAACGTTCCCGTCATCGTTCGTGCTCGCTTCGTTTCCGAGTTG…	OK	450	YES	CAG	Glutamine	Glutamine (CAG)
yHMPu5000041776_spencermartinsiella_ligniputridi_170912.g002942.m1	ATGCCTACTCGTTTGACCAAAACCCGAAAACACAGAGGACACGTTTCTGCTGGTCATGGTAGAATCGGAAAGCACAGAAAGCATCCCGGTGGTCGAGGTATGGCCGGTGGTCAGCACCACCACCGAACCAACTTGGACAAATACCATCCCGGTTACTTTGGAAAGGTCGGTATGCGATACTTCCACAAGCAGAAGAACCATTTCTGGAAGCCCATTTTGAACTTGGACAAGCTGTGGACTTTGATCCCCGAAGAGCAGAGAGAGAAATTGCAGAGCTCAGCTTCTGCTTCCAGTGCACCTGTCATTGACACTTTGGCTGCTGGATACGGTAAAGTTCTTGGAAAGGGCCGACTTCCTCAGGTTCCCGTCATTGTCAAGGCTCGATACGTCAGTGAGTTG…	ATGCCTACTCGTTTGACCAAAACCCGAAAACACAGAGGACACGTTTCTGCTGGTCATGGTAGAATCGGAAAGCACAGAAAGCATCCCGGTGGTCGAGGTATGGCCGGTGGTCAGCACCACCACCGAACCAACTTGGACAAATACCATCCCGGTTACTTTGGAAAGGTCGGTATGCGATACTTCCACAAGCAGAAGAACCATTTCTGGAAGCCCATTTTGAACTTGGACAAGCTGTGGACTTTGATCCCCGAAGAGCAGAGAGAGAAATTGCAGAGCTCAGCTTCTGCTTCCAGTGCACCTGTCATTGACACTTTGGCTGCTGGATACGGTAAAGTTCTTGGAAAGGGCCGACTTCCTCAGGTTCCCGTCATTGTCAAGGCTCGATACGTCAGTGAGTTG…	OK	450	YES	CAG	Glutamine	Glutamine (CAG)
yHMPu5000038100_candida_musiphila_170912_g002291.m1	ATGCCTACTCGTCTTTCGAAGACCCGCAAGTCCCGTGGCCACGTTTCTGCCGGTTACGGTCGTATCGGCAAGCACCGCAAGAGCTCCGGTGGTCGTGGTATGGCCGGTGGTCAGCACCACCACCGTACTAACCTCGATAAGTACCACCCTGGTTACTTCGGTAAGGTTGGTTTCCGCCACTTCCATCTTCTGCGCAACCGTCAGTGGCGCCCTGTTCTGAACCTTGACAAGATCTGGTCTCTCATTCCCGCCGAGGAGCGCGAGAAGCACCTCTCTGCCACCGCTGAGTCCGCCCCTGTTATTGACACTCTCGCTGCTGGTTACGGTAAGGTTCTTGGCAAGGGCCGCATCCCCAACGTCCCCATCATTGTCCGCGCCCGCTTCGTTTCTGAGCTCGCT…	ATGCCTACTCGTCTTTCGAAGACCCGCAAGTCCCGTGGCCACGTTTCTGCCGGTTACGGTCGTATCGGCAAGCACCGCAAGAGCTCCGGTGGTCGTGGTATGGCCGGTGGTCAGCACCACCACCGTACTAACCTCGATAAGTACCACCCTGGTTACTTCGGTAAGGTTGGTTTCCGCCACTTCCATCTTCTGCGCAACCGTCAGTGGCGCCCTGTTCTGAACCTTGACAAGATCTGGTCTCTCATTCCCGCCGAGGAGCGCGAGAAGCACCTCTCTGCCACCGCTGAGTCCGCCCCTGTTATTGACACTCTCGCTGCTGGTTACGGTAAGGTTCTTGGCAAGGGCCGCATCCCCAACGTCCCCATCATTGTCCGCGCCCGCTTCGTTTCTGAGCTCGCT…	OK	462	YES	CAG	Glutamine	Glutamine (CAG)
candida_infanticola_g000424.m1	ATGCCTACTCGTCTCTCTAAAACCCGCAAGTCGCGCGGCCACGTTTCTGCCGGTCACGGTCGTATTGGCAAGCACCGCAAGAACCCAGGTGGTCGTGGTATGGCTGGTGGTCAGCACCATCACCGTACTAACTTGGACAAGTACCATCCTGGTTACTTTGGTAAACTCGGTTTCCGTCACTTCCACCTCCTCCGCAACCGTCAGTGGCGCCCTGTTCTGAACGTGGACAAGCTCTGGACTCTTGTCCCCGCTGAGGACCGCGAGAAGTATCTTTCTTCTCCCAACCCCCAGGCTGCCCCCATCATCGATACTCTGGCTGCTGGCTACGGCAAGGTCTTGGGCAAGGGCCGCATCCCCGATGTCCCCGTCATTGTCCGTGCTCGCTTCGTTTCTGAGCTT…	ATGCCTACTCGTCTCTCTAAAACCCGCAAGTCGCGCGGCCACGTTTCTGCCGGTCACGGTCGTATTGGCAAGCACCGCAAGAACCCAGGTGGTCGTGGTATGGCTGGTGGTCAGCACCATCACCGTACTAACTTGGACAAGTACCATCCTGGTTACTTTGGTAAACTCGGTTTCCGTCACTTCCACCTCCTCCGCAACCGTCAGTGGCGCCCTGTTCTGAACGTGGACAAGCTCTGGACTCTTGTCCCCGCTGAGGACCGCGAGAAGTATCTTTCTTCTCCCAACCCCCAGGCTGCCCCCATCATCGATACTCTGGCTGCTGGCTACGGCAAGGTCTTGGGCAAGGGCCGCATCCCCGATGTCCCCGTCATTGTCCGTGCTCGCTTCGTTTCTGAGCTT…	OK	450	YES	CAG	Glutamine	Glutamine (CAG)
yHMPu5000038096_candida_sorbophila_170912_g003239.m1	ATGCCTACTCGTCTCTCTAAAACCCGCAAGTCGCGCGGCCACGTTTCTGCCGGTCACGGTCGTATTGGCAAGCACCGCAAGAACCCAGGTGGTCGTGGTATGGCTGGTGGTCAGCACCATCACCGTACTAACTTGGACAAGTACCATCCTGGTTACTTTGGTAAACTCGGTTTCCGTCACTTCCACCTCCTCCGCAACCGTCAGTGGCGCCCTGTTCTGAACGTGGACAAGCTCTGGACTCTTGTCCCCGCTGAGGACCGCGAGAAGTATCTTTCTTCTCCCAACCCCCAGGCTGCCCCCATCATCGATACTCTGGCTGCTGGCTACGGCAAGGTCTTGGGCAAGGGCCGCATCCCCGATGTCCCCGTCATTGTCCGTGCTCGCTTCGTTTCTGAGCTT…	ATGCCTACTCGTCTCTCTAAAACCCGCAAGTCGCGCGGCCACGTTTCTGCCGGTCACGGTCGTATTGGCAAGCACCGCAAGAACCCAGGTGGTCGTGGTATGGCTGGTGGTCAGCACCATCACCGTACTAACTTGGACAAGTACCATCCTGGTTACTTTGGTAAACTCGGTTTCCGTCACTTCCACCTCCTCCGCAACCGTCAGTGGCGCCCTGTTCTGAACGTGGACAAGCTCTGGACTCTTGTCCCCGCTGAGGACCGCGAGAAGTATCTTTCTTCTCCCAACCCCCAGGCTGCCCCCATCATCGATACTCTGGCTGCTGGCTACGGCAAGGTCTTGGGCAAGGGCCGCATCCCCGATGTCCCCGTCATTGTCCGTGCTCGCTTCGTTTCTGAGCTT…	OK	450	YES	CAG	Glutamine	Glutamine (CAG)
yHMPu5000035289_candida_infanticola_170713_g002107.m1	ATGCCTACTCGTCTCTCTAAAACCCGCAAGTCGCGCGGCCACGTTTCTGCCGGTCACGGTCGTATTGGCAAGCACCGCAAGAACCCAGGTGGTCGTGGTATGGCTGGTGGTCAGCACCATCACCGTACTAACTTGGACAAGTACCACCCTGGTTACTTTGGTAAACTCGGTTTCCGTCACTTCCACCTCCTCCGCAACCGTCAGTGGCGCCCTGTTTTGAACGTGGACAAGCTCTGGACTCTTGTCCCCGCTGAGGACCGCGAGAAGTACCTTTCTTCTCCCAACCCCCAGGCTGCCCCCGTCATCGATACTCTGGCTGCTGGCTACGGCAAGGTCTTGGGCAAGGGCCGCATCCCCGATGTCCCCGTCATTGTCCGTGCTCGCTTCGTTTCTGAGCTT…	ATGCCTACTCGTCTCTCTAAAACCCGCAAGTCGCGCGGCCACGTTTCTGCCGGTCACGGTCGTATTGGCAAGCACCGCAAGAACCCAGGTGGTCGTGGTATGGCTGGTGGTCAGCACCATCACCGTACTAACTTGGACAAGTACCACCCTGGTTACTTTGGTAAACTCGGTTTCCGTCACTTCCACCTCCTCCGCAACCGTCAGTGGCGCCCTGTTTTGAACGTGGACAAGCTCTGGACTCTTGTCCCCGCTGAGGACCGCGAGAAGTACCTTTCTTCTCCCAACCCCCAGGCTGCCCCCGTCATCGATACTCTGGCTGCTGGCTACGGCAAGGTCTTGGGCAAGGGCCGCATCCCCGATGTCCCCGTCATTGTCCGTGCTCGCTTCGTTTCTGAGCTT…	OK	450	YES	CAG	Glutamine	Glutamine (CAG)
yHMPu5000038046_wickerhamiella_siamensis_170912_g001240.m1	ATGCCTACTCGTCTCTCTAAAACCCGCAAGTCGCGCGGCCACGTCTCCGCTGGTCACGGTCGTATTGGCAAGCACCGCAAGAATCCCGGTGGTCGTGGTATGGCCGGTGGTCAGCACCACCACCGTACTAACTTGGATAAGTACCATCCTGGTTACTTTGGTAAACTCGGTTTCCGTCACTTCCACCTCCTCCGCAACCGTCAGTGGCGCCCTGTGCTGAACCTGGACAAGCTCTGGACCCTTGTCCCCGCTGAGGACCGCGAGAAGTACCTGTCTGCTCCTAACGCCTCTGCTGCCCCCGTCATTGATACTCTGGCTGCTGGCTACGGCAAGGTCCTTGGCAAGGGCCGCATCCCCGATGTGCCTGTCATTGTCCGCGCTCGCTTTGTTTCTGAGCTT…	ATGCCTACTCGTCTCTCTAAAACCCGCAAGTCGCGCGGCCACGTCTCCGCTGGTCACGGTCGTATTGGCAAGCACCGCAAGAATCCCGGTGGTCGTGGTATGGCCGGTGGTCAGCACCACCACCGTACTAACTTGGATAAGTACCATCCTGGTTACTTTGGTAAACTCGGTTTCCGTCACTTCCACCTCCTCCGCAACCGTCAGTGGCGCCCTGTGCTGAACCTGGACAAGCTCTGGACCCTTGTCCCCGCTGAGGACCGCGAGAAGTACCTGTCTGCTCCTAACGCCTCTGCTGCCCCCGTCATTGATACTCTGGCTGCTGGCTACGGCAAGGTCCTTGGCAAGGGCCGCATCCCCGATGTGCCTGTCATTGTCCGCGCTCGCTTTGTTTCTGAGCTT…	OK	450	YES	CAG	Glutamine	Glutamine (CAG)
yHMPu5000037255_wickerhamiella_qilinesis_210210_g002908.m1	ATGCCTACTCGGTTTAGCAAGACGAGAAAGAGCCGTGGCAACGTGTCCGCCGGCTACGGTCGTATTGGCAAGCACCGCAAGTCCCCTGGTGGTCGCGGTATGGCCGGTGGTATGCACCACCACCGCACCAACATGGACAAGTACCACCCTGGTTACTTTGGTAAGGTCGGTTTCCGCCACTACCATCTGCTCAAGAACCGTACTTGGCGCCCCATCCTGAACCTGGAGAATCTCTGGTCTCTGGTTCCCACTGAGTCCCGCGACAAGTACCTGTCCTCGCCCAACCCCAGCGCTGCCCCTGTCATCGACACCCTGGCTGCTGGCTATGGCAAGGTTCTTGGTAAGGGCCGCCTCCCCGAGGTGCCCGTCATTGTCCGTGCCCGCTTTGTTTCGCAGCTG…	ATGCCTACTCGGTTTAGCAAGACGAGAAAGAGCCGTGGCAACGTGTCCGCCGGCTACGGTCGTATTGGCAAGCACCGCAAGTCCCCTGGTGGTCGCGGTATGGCCGGTGGTATGCACCACCACCGCACCAACATGGACAAGTACCACCCTGGTTACTTTGGTAAGGTCGGTTTCCGCCACTACCATCTGCTCAAGAACCGTACTTGGCGCCCCATCCTGAACCTGGAGAATCTCTGGTCTCTGGTTCCCACTGAGTCCCGCGACAAGTACCTGTCCTCGCCCAACCCCAGCGCTGCCCCTGTCATCGACACCCTGGCTGCTGGCTATGGCAAGGTTCTTGGTAAGGGCCGCCTCCCCGAGGTGCCCGTCATTGTCCGTGCCCGCTTTGTTTCGCAGCTG…	OK	450	YES	ATG	Methionine	Methionine (ATG)
yHMPu5000037897_Candida_kazuoi_SPADES_g003615.m1	ATGCCTACTCGGTTGAGCAAGACTAGAAAGAGCCGTGGTAACGTCTCGGCTGGTTACGGTCGTATCGGCAAGCACCGCAAGTCTTCCGGTGGTCGCGGTATGGCCGGTGGTTTCCACCACCACCGTACTAACCTCGACAAGTACCACCCTGGTTACTTCGGTAAGGTTGGTTTCCGTCACTACCACCTGCTGAAGAACCGCACCTGGCGCCCGACTCTCAACCTTGAGAAGCTCTGGTCGCTGGTGCCCTCTGAGTCGCGCGACAAGTACCTCTCGTCGCCCAACGCCAACGCTGCCCCCGTCATCGACACCCTGGCTGCTGGCTACGGCAAGGTTCTTGGTAAGGGCCGCATCCCCGAGGTCCCCGTCATTGTCCGCGCCCGCTTCGTCTCGCAGCTG…	ATGCCTACTCGGTTGAGCAAGACTAGAAAGAGCCGTGGTAACGTCTCGGCTGGTTACGGTCGTATCGGCAAGCACCGCAAGTCTTCCGGTGGTCGCGGTATGGCCGGTGGTTTCCACCACCACCGTACTAACCTCGACAAGTACCACCCTGGTTACTTCGGTAAGGTTGGTTTCCGTCACTACCACCTGCTGAAGAACCGCACCTGGCGCCCGACTCTCAACCTTGAGAAGCTCTGGTCGCTGGTGCCCTCTGAGTCGCGCGACAAGTACCTCTCGTCGCCCAACGCCAACGCTGCCCCCGTCATCGACACCCTGGCTGCTGGCTACGGCAAGGTTCTTGGTAAGGGCCGCATCCCCGAGGTCCCCGTCATTGTCCGCGCCCGCTTCGTCTCGCAGCTG…	OK	450	YES	TTC	Phenylalanine	Phenylalanine (TTC)
yHMPu5000041860_candida_galacta_170912_g004205.m1	ATGCCTACTCGCTTGTCCAAGACTAGAAAGGCCCGCGGTAACGTCTCTGCTGGTTACGGCCGTGTCGGCAAGCACCGCAAGAATCCTGGTGGACGTGGTATGGCTGGTGGCCAGCACCATCACCGCACTAACCTCGACAAGTATCACCCTGGTTACTTTGGTAAGGTTGGTTTCCGTCACTACCACTTGCTCAAGAACCGTGTGTGGCGCCCCGTTCTAAACATTGACAGGCTTTGGTCGCTTATTCCCCGGGAAGATCGCCAGAAGTATCTTGCGTCTCCCAACGCTTCCGCCGCCCCTGTTATCGACACCCTTGCTGCCGGCTACGGCAAGATCCTCGGCAAGGGCCGTATCCCCGAGGTCCCTGTTATTGTGCGTGCTCGCTTCGTCTCTGAGCTT…	ATGCCTACTCGCTTGTCCAAGACTAGAAAGGCCCGCGGTAACGTCTCTGCTGGTTACGGCCGTGTCGGCAAGCACCGCAAGAATCCTGGTGGACGTGGTATGGCTGGTGGCCAGCACCATCACCGCACTAACCTCGACAAGTATCACCCTGGTTACTTTGGTAAGGTTGGTTTCCGTCACTACCACTTGCTCAAGAACCGTGTGTGGCGCCCCGTTCTAAACATTGACAGGCTTTGGTCGCTTATTCCCCGGGAAGATCGCCAGAAGTATCTTGCGTCTCCCAACGCTTCCGCCGCCCCTGTTATCGACACCCTTGCTGCCGGCTACGGCAAGATCCTCGGCAAGGGCCGTATCCCCGAGGTCCCTGTTATTGTGCGTGCTCGCTTCGTCTCTGAGCTT…	OK	450	YES	CAG	Glutamine	Glutamine (CAG)
yHMPu5000035282_trigonopsis_vinaria_170307_g004587.m1	ATGCCTACTCGACACACCAAGACTCGCAAGCTTCGAGGCCACGTTTCTGCCGGTCACGGTCGTATCGGCAAGCACCGCAAGCACCCAGGTGGTCGCGGTATGGCTGGTGGCCAGCACCACCACCGAACCAACCTCGATAAGTACCACCCTGGTTACTTTGGTAAGATCGGTATGCGATATTTCCACAAGCAGCAGAACCACTTCTGGCGACCTTCCATCAACCTTGAGAAGTTGTGGACTCTTGTCCCCGCTGAGAAGCGTGAGGAGTACTTGAAGTCCGGCTCCGACAGCGCTGCCCCCGTCATCGACACTCTTGCCAACGGTTTCGGCAAGGTTCTCGGCAAGGGCCGACTTCCCCAGGTCCCCGTCATTGTCAAGGCTCGATTTGTTTCCAAGCTC…	ATGCCTACTCGACACACCAAGACTCGCAAGCTTCGAGGCCACGTTTCTGCCGGTCACGGTCGTATCGGCAAGCACCGCAAGCACCCAGGTGGTCGCGGTATGGCTGGTGGCCAGCACCACCACCGAACCAACCTCGATAAGTACCACCCTGGTTACTTTGGTAAGATCGGTATGCGATATTTCCACAAGCAGCAGAACCACTTCTGGCGACCTTCCATCAACCTTGAGAAGTTGTGGACTCTTGTCCCCGCTGAGAAGCGTGAGGAGTACTTGAAGTCCGGCTCCGACAGCGCTGCCCCCGTCATCGACACTCTTGCCAACGGTTTCGGCAAGGTTCTCGGCAAGGGCCGACTTCCCCAGGTCCCCGTCATTGTCAAGGCTCGATTTGTTTCCAAGCTC…	OK	450	YES	CAG	Glutamine	Glutamine (CAG)
yHMPu5000038074_candida_vaughaniae_170912_g003104.m1	ATGCCTACTAGATTTACTAAGACCAGAAAGCACAGAGGACACGTTTCAGCCGGTAACGGTAGAATCGGTAAGCACAGAAAGCATCCCGGTGGTAGAGGTATGGCTGGTGGTCAACACCACCACAGAACCAACTTGGATAAATACCATCCAGGTTACTTCGGTAAAGTTGGTATGAGATACTTCCACAAACAACAAAACCACTTCTGGAGACCAGAAATCAACTTGGACAAATTATGGACCTTAGTTGACGAAGAAAAGAAGGACGAATACTTGAAGTCTGCTTCTGCTTCTGCTGCCCCAGTCATCGACACCTTGGCCCACGGTTACGGTAAGGTCTTGGGTAAAGGTAGATTACCAGAAGTCCCAGTCATTGTCAAGGCTAGATTTGTTTCTAAGTTA…	ATGCCTACTAGATTTACTAAGACCAGAAAGCACAGAGGACACGTTTCAGCCGGTAACGGTAGAATCGGTAAGCACAGAAAGCATCCCGGTGGTAGAGGTATGGCTGGTGGTCAACACCACCACAGAACCAACTTGGATAAATACCATCCAGGTTACTTCGGTAAAGTTGGTATGAGATACTTCCACAAACAACAAAACCACTTCTGGAGACCAGAAATCAACTTGGACAAATTATGGACCTTAGTTGACGAAGAAAAGAAGGACGAATACTTGAAGTCTGCTTCTGCTTCTGCTGCCCCAGTCATCGACACCTTGGCCCACGGTTACGGTAAGGTCTTGGGTAAAGGTAGATTACCAGAAGTCCCAGTCATTGTCAAGGCTAGATTTGTTTCTAAGTTA…	OK	450	YES	CAA	Glutamine	Glutamine (CAA)
yHMPu5000038026_yamadazyma_ubonensis_170912_g002789.m1	ATGCCTACTAGATTTACTAAGACCAGAAAACACAGAGGACACGTTTCCGCCGGTAAGGGTAGAATTGGTAAGCACAGAAAATCCCCAGGTGGTAGAGGTATGGCTGGTGGTCAACACCACCACAGAACCAACATGGATAAATACCATCCAGGTTACTTCGGTAAAGTTGGTATGAGATACTTCCACAAGCAACAAAACCACTTCTGGAAACCAGAAATTAACTTGGACAAATTATGGACTTTAGTCGACAGTGAAAAGAAAGATGAATACTTAAAGTCTGCTTCCGCTTCTGCTGCTCCAGTCATTGACACCTTAGCTCACGGTTACGGTAAAGTTTTAGGTAAGGGTAGATTACCAGAAGTTCCAGTTATTGTCAAGGCCAGATTTGTTTCCAAGTTG…	ATGCCTACTAGATTTACTAAGACCAGAAAACACAGAGGACACGTTTCCGCCGGTAAGGGTAGAATTGGTAAGCACAGAAAATCCCCAGGTGGTAGAGGTATGGCTGGTGGTCAACACCACCACAGAACCAACATGGATAAATACCATCCAGGTTACTTCGGTAAAGTTGGTATGAGATACTTCCACAAGCAACAAAACCACTTCTGGAAACCAGAAATTAACTTGGACAAATTATGGACTTTAGTCGACAGTGAAAAGAAAGATGAATACTTAAAGTCTGCTTCCGCTTCTGCTGCTCCAGTCATTGACACCTTAGCTCACGGTTACGGTAAAGTTTTAGGTAAGGGTAGATTACCAGAAGTTCCAGTTATTGTCAAGGCCAGATTTGTTTCCAAGTTG…	OK	450	YES	CAA	Glutamine	Glutamine (CAA)
yHMPu5000037912_candida_dendronema_170912_g004816.m1	ATGCCTACTAGATTTACTAAAACTAGAAAACACAGAGGACACGTTTCAGCCGGTAACGGTAGAATCGGTAAGCACAGAAAGCATCCCGGTGGTAGAGGTATGGCTGGTGGTCAACATCACCACAGAACCAACTTGGATAAATACCATCCAGGTTACTTCGGTAAAGTTGGTATGAGATACTTCCACAAACAACAAAACCACTTCTGGAGACCAGAAATCAACTTGGACAAATTATGGACTTTAGTTGATGAAGAAAAGAAGGACGAATACTTGAAGTCTTCTTCTACTTCTGCTGCTCCAGTCATCGACACTTTAGCTCACGGTTACGGTAAGGTTTTGGGTAAAGGTAGATTACCAGAAGTCCCAGTCATTGTCAAGGCCAGATTTGTTTCTAAGTTA…	ATGCCTACTAGATTTACTAAAACTAGAAAACACAGAGGACACGTTTCAGCCGGTAACGGTAGAATCGGTAAGCACAGAAAGCATCCCGGTGGTAGAGGTATGGCTGGTGGTCAACATCACCACAGAACCAACTTGGATAAATACCATCCAGGTTACTTCGGTAAAGTTGGTATGAGATACTTCCACAAACAACAAAACCACTTCTGGAGACCAGAAATCAACTTGGACAAATTATGGACTTTAGTTGATGAAGAAAAGAAGGACGAATACTTGAAGTCTTCTTCTACTTCTGCTGCTCCAGTCATCGACACTTTAGCTCACGGTTACGGTAAGGTTTTGGGTAAAGGTAGATTACCAGAAGTCCCAGTCATTGTCAAGGCCAGATTTGTTTCTAAGTTA…	OK	450	YES	CAA	Glutamine	Glutamine (CAA)
yHMPu5000035684_kloeckera_hatyaiensis_160519.haplomerger2.g000021.m1	ATGCCTACTAGATTTACTAAAACCAGAAAACACAGAGGTCACGTCTCAGCCGGTAACGGTAGAATCGGTAAACACAGAAAGCATCCGGGTGGTAGAGGTATGGCTGGTGGTCAACATCACCACAGAATCAACTTAGATAAGTACCATCCAGGTTACTTCGGTAAAGTTGGTATGAGATACTTCCACAAGCAACAAAACCACTTCTGGAAGCCAGTCTTAAACTTAGACAAGTTATGGACTTTGATCCCAGAAGAAAAGAGAGAAGACTACTTAAAGAACTCTTCTTCTGCTTCTGCTCCAGTCATCGACACTTTAGCTGCTGGTTACGGTAAGGTCTTAGGTAAGGGTAAATTACCTCAAGTTCCAGTCATCGTTAAGGCTAGATTTGTTTCTAAGTTA…	ATGCCTACTAGATTTACTAAAACCAGAAAACACAGAGGTCACGTCTCAGCCGGTAACGGTAGAATCGGTAAACACAGAAAGCATCCGGGTGGTAGAGGTATGGCTGGTGGTCAACATCACCACAGAATCAACTTAGATAAGTACCATCCAGGTTACTTCGGTAAAGTTGGTATGAGATACTTCCACAAGCAACAAAACCACTTCTGGAAGCCAGTCTTAAACTTAGACAAGTTATGGACTTTGATCCCAGAAGAAAAGAGAGAAGACTACTTAAAGAACTCTTCTTCTGCTTCTGCTCCAGTCATCGACACTTTAGCTGCTGGTTACGGTAAGGTCTTAGGTAAGGGTAAATTACCTCAAGTTCCAGTCATCGTTAAGGCTAGATTTGTTTCTAAGTTA…	OK	450	YES	CAA	Glutamine	Glutamine (CAA)
yHMPu5000035296_priceomyces_carsonii_160928_g003029.m1	ATGCCTACTAGATTTACGAAGACCAGAAAGCACAGAGGCCACGTTTCAGCCGGTAAGGGTAGAATTGGTAAGCACAGAAAGCATCCCGGTGGTCGTGGTAAGGCTGGTGGTCAACATCATCACAGAACCAACATGGATAAATACCATCCTGGTTACTTTGGTAAAGTCGGTATGAGATACTTCCACAAACAAAGAAACCACTTCTGGAAACCAGAAATTAACTTAGACAAATTGTGGACCTTGGTCGAAGAGGACAAGAAGGACAACTACTTGAAGTCTTCATCTACCTCTGCTGCTCCAGTCATCGACACCTTAGCTTATGGCTACGGTAAGGTTTTAGGTAAGGGAAGATTACCTGAGGTTCCAGTCATTGTCAAAGCAAGATTTGTCTCCAAATTA…	ATGCCTACTAGATTTACGAAGACCAGAAAGCACAGAGGCCACGTTTCAGCCGGTAAGGGTAGAATTGGTAAGCACAGAAAGCATCCCGGTGGTCGTGGTAAGGCTGGTGGTCAACATCATCACAGAACCAACATGGATAAATACCATCCTGGTTACTTTGGTAAAGTCGGTATGAGATACTTCCACAAACAAAGAAACCACTTCTGGAAACCAGAAATTAACTTAGACAAATTGTGGACCTTGGTCGAAGAGGACAAGAAGGACAACTACTTGAAGTCTTCATCTACCTCTGCTGCTCCAGTCATCGACACCTTAGCTTATGGCTACGGTAAGGTTTTAGGTAAGGGAAGATTACCTGAGGTTCCAGTCATTGTCAAAGCAAGATTTGTCTCCAAATTA…	OK	450	YES	CAA	Glutamine	Glutamine (CAA)
yHMPu5000035332_candida_insectalens_201018_g001992.m1	ATGCCTACTAGATTGAGAAAGACAAGAAAGCACAGAGGTAACGTGTGTGCCGGTTACGGTAGAATCGGAAAGCACCGTAAGTCTCCAGGTGGAAGAGGTATGGCTGGTGGTCAACACCATCACCGTATTGCTATGGACAAATATCACCCAGGTTACTTCGGTAAGGTTGGTATGAGAGTGTTCAACTTGCAAAGAAACCGTTCTTGGAACCCAACCATCAACGTCAACGGACTTTGGAACCTCGTTGAGGATGCCGATGAGAAGAAGAAGGCTTCTACTAAGGACTCTGCTATTGTCATCGACACTCTTGCTAAGGGTTACGGTAAGGTTCTTGGTAGCGGTGAGCTTCCAAACATTCCAATCATTGTCAAGGCCCGTTACGTTTCTAGAGTTGCTGAG…	ATGCCTACTAGATTGAGAAAGACAAGAAAGCACAGAGGTAACGTGTGTGCCGGTTACGGTAGAATCGGAAAGCACCGTAAGTCTCCAGGTGGAAGAGGTATGGCTGGTGGTCAACACCATCACCGTATTGCTATGGACAAATATCACCCAGGTTACTTCGGTAAGGTTGGTATGAGAGTGTTCAACTTGCAAAGAAACCGTTCTTGGAACCCAACCATCAACGTCAACGGACTTTGGAACCTCGTTGAGGATGCCGATGAGAAGAAGAAGGCTTCTACTAAGGACTCTGCTATTGTCATCGACACTCTTGCTAAGGGTTACGGTAAGGTTCTTGGTAGCGGTGAGCTTCCAAACATTCCAATCATTGTCAAGGCCCGTTACGTTTCTAGAGTTGCTGAG…	OK	444	YES	CAA	Glutamine	Glutamine (CAA)
yHMPu5000038030_yamadazyma_phyllophila_170912_g002052.m1	ATGCCTACTAGATTGACTAAGACCAGAAAGCACAGAGGACACGTTTCCGCCGGTAGAGGTAGAATTGGTAAGCACAGAAAGCATCCAGGTGGTAGAGGTATGGCTGGTGGTCAACACCACCACAGAACTAACTTGGATAAATACCACCCAGGTTACTTCGGTAAGGTCGGTATGAGATACTTCCACAAGCAACAAAACCACTTCTGGAGACCAGAAATCAACTTGGACAAATTATGGACCTTAGTTGAAAGCGAAAAGAAGGACGAATACTTAAAGTCTGCTTCTGCTTCCGCTGCCCCAGTCATCGACACCTTAGCCCACGGTTACGGTAAGGTTTTGGGTAAAGGTAGATTACCAGAAGTTCCTGTCATTGTCAAGGCCAGATTTGTTTCCAAGTTG…	ATGCCTACTAGATTGACTAAGACCAGAAAGCACAGAGGACACGTTTCCGCCGGTAGAGGTAGAATTGGTAAGCACAGAAAGCATCCAGGTGGTAGAGGTATGGCTGGTGGTCAACACCACCACAGAACTAACTTGGATAAATACCACCCAGGTTACTTCGGTAAGGTCGGTATGAGATACTTCCACAAGCAACAAAACCACTTCTGGAGACCAGAAATCAACTTGGACAAATTATGGACCTTAGTTGAAAGCGAAAAGAAGGACGAATACTTAAAGTCTGCTTCTGCTTCCGCTGCCCCAGTCATCGACACCTTAGCCCACGGTTACGGTAAGGTTTTGGGTAAAGGTAGATTACCAGAAGTTCCTGTCATTGTCAAGGCCAGATTTGTTTCCAAGTTG…	OK	450	YES	CAA	Glutamine	Glutamine (CAA)
yHMPu5000040908_yamadazyma_paraphyllophila_201018_g002974.m1	ATGCCTACTAGATTGACTAAGACCAGAAAGCACAGAGGACACGTTTCCGCCGGTAGAGGTAGAATTGGTAAGCACAGAAAGCATCCAGGTGGTAGAGGTATGGCTGGTGGTCAACACCACCACAGAACTAACTTGGATAAATACCACCCAGGTTACTTCGGTAAAGTCGGTATGAGATACTTCCACAAGCAACAAAACCACTTCTGGAGACCAGAAATCAACTTGGACAAATTATGGACCTTAGTTGAAAGCGAAAAGAAGGACGAATACTTAAAGTCTGCTTCTGCTTCCGCTGCCCCAGTCATTGACACCTTAGCTCACGGTTACGGTAAAGTTTTGGGTAAAGGTAGATTACCAGAAGTTCCAGTCATTGTCAAGGCCAGATTTGTTTCCAAGTTG…	ATGCCTACTAGATTGACTAAGACCAGAAAGCACAGAGGACACGTTTCCGCCGGTAGAGGTAGAATTGGTAAGCACAGAAAGCATCCAGGTGGTAGAGGTATGGCTGGTGGTCAACACCACCACAGAACTAACTTGGATAAATACCACCCAGGTTACTTCGGTAAAGTCGGTATGAGATACTTCCACAAGCAACAAAACCACTTCTGGAGACCAGAAATCAACTTGGACAAATTATGGACCTTAGTTGAAAGCGAAAAGAAGGACGAATACTTAAAGTCTGCTTCTGCTTCCGCTGCCCCAGTCATTGACACCTTAGCTCACGGTTACGGTAAAGTTTTGGGTAAAGGTAGATTACCAGAAGTTCCAGTCATTGTCAAGGCCAGATTTGTTTCCAAGTTG…	OK	450	YES	CAA	Glutamine	Glutamine (CAA)
yHMPu5000035252_yamadazyma_nakazawae_170307_g001672.m1	ATGCCTACTAGATTGACTAAGACCAGAAAGCACAGAGGACACGTTTCCGCCGGTAGAGGTAGAATCGGTAAGCACAGAAAGCATCCCGGTGGTAGAGGTATGGCTGGTGGTCAACATCACCACAGAACCAACTTGGATAAGTACCATCCAGGTTACTTCGGTAAGGTTGGTATGAGATACTTCCACAAGCAACAAAACCACTTCTGGAGACCAGAAATCAACTTGGACAAATTGTGGACTTTGGTTGAAGAAGAAAAGAAGGACGAATACTTAAAGTCTGCTTCTACTTCTGCTGCTCCAGTCATTGACACTTTGGCCCACGGTTACGGTAAGGTTTTGGCTAAGGGTAGATTACCAAACGTTCCAGTCATTGTCAAGGCCAGATTTGTTTCCAAATTG…	ATGCCTACTAGATTGACTAAGACCAGAAAGCACAGAGGACACGTTTCCGCCGGTAGAGGTAGAATCGGTAAGCACAGAAAGCATCCCGGTGGTAGAGGTATGGCTGGTGGTCAACATCACCACAGAACCAACTTGGATAAGTACCATCCAGGTTACTTCGGTAAGGTTGGTATGAGATACTTCCACAAGCAACAAAACCACTTCTGGAGACCAGAAATCAACTTGGACAAATTGTGGACTTTGGTTGAAGAAGAAAAGAAGGACGAATACTTAAAGTCTGCTTCTACTTCTGCTGCTCCAGTCATTGACACTTTGGCCCACGGTTACGGTAAGGTTTTGGCTAAGGGTAGATTACCAAACGTTCCAGTCATTGTCAAGGCCAGATTTGTTTCCAAATTG…	OK	450	YES	CAA	Glutamine	Glutamine (CAA)
yHMPu5000035640_yamadazyma_philogaea_160519_g003262.m1	ATGCCTACTAGATTGACTAAGACCAGAAAGCACAGAGGACACGTTTCCGCCGGTAAAGGTAGAATCGGTAAGCACAGAAAGCATCCCGGTGGTAGAGGTATGGCTGGTGGTCAACATCACCACAGAACCAACTTGGATAAGTACCACCCAGGTTACTTCGGTAAAGTTGGTATGAGATACTTCCACAAGCAACAAAACCACTTCTGGAGACCAGAAATCAACTTAGACAAATTGTGGACTTTGGTTGACGAAGAAAAGAAGGATGAATACTTGAAATCTGCTTCTACTTCTGCTGCCCCAGTTATTGACACTTTGGCCTACGGTTATGGTAAGGTTTTGGCCAAGGGTAGATTACCAAATGCTCCAGTCATTGTCAAGGCCAGATTTGTTTCTAAGTTG…	ATGCCTACTAGATTGACTAAGACCAGAAAGCACAGAGGACACGTTTCCGCCGGTAAAGGTAGAATCGGTAAGCACAGAAAGCATCCCGGTGGTAGAGGTATGGCTGGTGGTCAACATCACCACAGAACCAACTTGGATAAGTACCACCCAGGTTACTTCGGTAAAGTTGGTATGAGATACTTCCACAAGCAACAAAACCACTTCTGGAGACCAGAAATCAACTTAGACAAATTGTGGACTTTGGTTGACGAAGAAAAGAAGGATGAATACTTGAAATCTGCTTCTACTTCTGCTGCCCCAGTTATTGACACTTTGGCCTACGGTTATGGTAAGGTTTTGGCCAAGGGTAGATTACCAAATGCTCCAGTCATTGTCAAGGCCAGATTTGTTTCTAAGTTG…	OK	450	YES	CAA	Glutamine	Glutamine (CAA)
yHMPu5000035641_yamadazyma_scolyti_160613_g001549.m1	ATGCCTACTAGATTGACTAAGACCAGAAAACACAGAGGACACGTTTCAGCCGGTAACGGTAGAATTGGTAAGCACAGAAAGCATCCCGGTGGTAGAGGTATGGCTGGTGGTCAACATCACCACAGAACTAACTTGGATAAATACCATCCAGGTTACTTCGGTAAAGTTGGTATGAGATACTTCCACAAGCAACAAGCCCACTTCTGGAGACCAGAAATCAACTTGGACAAATTATGGACTTTAGTTGACGAAGAAAAGAAAGAAGATTACCTTAAGAACTCCAGCTCCAGTGCTGCTCCAGTCATCGACACCTTAGCTGCCGGTTACGGTAAAGTTTTGGGTAAGGGTAGATTACCAGAAGTTCCAGTCATTGTCAAAGCCAGATTCGTCTCTAAGTTA…	ATGCCTACTAGATTGACTAAGACCAGAAAACACAGAGGACACGTTTCAGCCGGTAACGGTAGAATTGGTAAGCACAGAAAGCATCCCGGTGGTAGAGGTATGGCTGGTGGTCAACATCACCACAGAACTAACTTGGATAAATACCATCCAGGTTACTTCGGTAAAGTTGGTATGAGATACTTCCACAAGCAACAAGCCCACTTCTGGAGACCAGAAATCAACTTGGACAAATTATGGACTTTAGTTGACGAAGAAAAGAAAGAAGATTACCTTAAGAACTCCAGCTCCAGTGCTGCTCCAGTCATCGACACCTTAGCTGCCGGTTACGGTAAAGTTTTGGGTAAGGGTAGATTACCAGAAGTTCCAGTCATTGTCAAAGCCAGATTCGTCTCTAAGTTA…	OK	450	YES	CAA	Glutamine	Glutamine (CAA)
yHMPu5000035251_candida_aaseri_170307_g004851.m1	ATGCCTACTAGATTGACTAAAACTAGAAAACATAGAGGACATGTCTCTGCCGGTCATGGTAGAATTGGTAAACACAGAAAGCATCCCGGTGGTAGAGGTATGGCTGGTGGTCAACATCACCACAGAACCAACTTAGATAAATACCATCCAGGTTACTTTGGTAAAGTTGGTATGAGATACTTCCACAAGCAACAAAACCACTTCTGGAGACCAGAAATCAACTTGGACAAATTATGGACTTTAGTTGAAGAAGAAAAGAAAGATGAATACTTAAAATCTGCTTCCAAATCCGCCGCCCCAGTCATCGATACTTTAGCTCATGGTTACGGTAAAGTTTTAGGTAAAGGTAAATTACCAGAAGTTCCAGTTATTGTCAAAGCCAGATTCGTCAGTAAATTA…	ATGCCTACTAGATTGACTAAAACTAGAAAACATAGAGGACATGTCTCTGCCGGTCATGGTAGAATTGGTAAACACAGAAAGCATCCCGGTGGTAGAGGTATGGCTGGTGGTCAACATCACCACAGAACCAACTTAGATAAATACCATCCAGGTTACTTTGGTAAAGTTGGTATGAGATACTTCCACAAGCAACAAAACCACTTCTGGAGACCAGAAATCAACTTGGACAAATTATGGACTTTAGTTGAAGAAGAAAAGAAAGATGAATACTTAAAATCTGCTTCCAAATCCGCCGCCCCAGTCATCGATACTTTAGCTCATGGTTACGGTAAAGTTTTAGGTAAAGGTAAATTACCAGAAGTTCCAGTTATTGTCAAAGCCAGATTCGTCAGTAAATTA…	OK	450	YES	CAA	Glutamine	Glutamine (CAA)
yHMPu5000037250_candida_pseudoviswanathii_210210_g002385.m1	ATGCCTACTAGATTGACTAAAACCAGAAAACACAGAGGTCACGTTTCTGCCGGTAAGGGTAGAATTGGTAAACACAGAAAGCATCCGGGTGGTAGAGGTAAGGCTGGTGGTCAACACCACCACAGAACCAACTTGGACAAGTACCATCCAGGTTACTTTGGTAAGGTTGGTATGAGATACTTCCACAAACAACAAAACCACTTCTGGAGACCAGAAATCAACTTGGACAAATTGTGGACCTTGGTTGAATCCGACAAGAAGGAAGAATACTTGACCAAGTCCTCCGCCTCCGCTGCCCCAGTCATCGACACCTTGGCCCACGGCTACGGTAAGGTCTTGGGTAAGGGTAGATTGCCTCAAGTTCCTGTCATTGTCAAGGCTAGATTTGTTTCTAAATTG…	ATGCCTACTAGATTGACTAAAACCAGAAAACACAGAGGTCACGTTTCTGCCGGTAAGGGTAGAATTGGTAAACACAGAAAGCATCCGGGTGGTAGAGGTAAGGCTGGTGGTCAACACCACCACAGAACCAACTTGGACAAGTACCATCCAGGTTACTTTGGTAAGGTTGGTATGAGATACTTCCACAAACAACAAAACCACTTCTGGAGACCAGAAATCAACTTGGACAAATTGTGGACCTTGGTTGAATCCGACAAGAAGGAAGAATACTTGACCAAGTCCTCCGCCTCCGCTGCCCCAGTCATCGACACCTTGGCCCACGGCTACGGTAAGGTCTTGGGTAAGGGTAGATTGCCTCAAGTTCCTGTCATTGTCAAGGCTAGATTTGTTTCTAAATTG…	OK	450	YES	CAA	Glutamine	Glutamine (CAA)
yHMPu5000038349_candida_viswanathii_170713.haplomerger2_g001570.m1	ATGCCTACTAGATTGACTAAAACCAGAAAACACAGAGGTCACGTTTCTGCCGGTAAGGGTAGAATTGGTAAACACAGAAAGCATCCGGGTGGTAGAGGTAAGGCTGGTGGTCAACACCACCACAGAACCAACTTGGACAAGTACCATCCAGGTTACTTTGGTAAGGTTGGTATGAGATACTTCCACAAACAACAAAACCACTTCTGGAGACCAGAAATCAACTTGGACAAATTGTGGACCTTGGTTGAATCCGACAAGAAGGAAGAATACTTGACCAAGTCCTCCGCCTCCGCTGCCCCAGTCATCGACACCTTGGCCCACGGCTACGGTAAGGTCTTGGGTAAGGGTAGATTGCCTCAAGTTCCTGTCATTGTCAAGGCTAGATTTGTTTCTAAATTG…	ATGCCTACTAGATTGACTAAAACCAGAAAACACAGAGGTCACGTTTCTGCCGGTAAGGGTAGAATTGGTAAACACAGAAAGCATCCGGGTGGTAGAGGTAAGGCTGGTGGTCAACACCACCACAGAACCAACTTGGACAAGTACCATCCAGGTTACTTTGGTAAGGTTGGTATGAGATACTTCCACAAACAACAAAACCACTTCTGGAGACCAGAAATCAACTTGGACAAATTGTGGACCTTGGTTGAATCCGACAAGAAGGAAGAATACTTGACCAAGTCCTCCGCCTCCGCTGCCCCAGTCATCGACACCTTGGCCCACGGCTACGGTAAGGTCTTGGGTAAGGGTAGATTGCCTCAAGTTCCTGTCATTGTCAAGGCTAGATTTGTTTCTAAATTG…	OK	450	YES	CAA	Glutamine	Glutamine (CAA)
yHMPu5000038324_scheffersomyces_gosingicus_180604_g000187.m1	ATGCCTACTAGATTGACCAAGACTAGAAAACACAGAGGACACGTTTCTGCCGGTAAGGGTAGAATCGGTAAGCACAGAAAGCACCCCGGTGGTCGTGGTAAGGCTGGTGGTCAACACCACCACAGAACCAACTTGGATAAGTACCACCCTGGTTACTTCGGTAAGGTTGGTATGAGATACTTCCACAAGCAACAAAACCACTTCTGGAGACCAGAAATCAACTTGGACAAGTTGTGGACTTTGGTTGAAGCTGACAAGAAGGACGAATACTTGAAGTCTGCTTCTGCTACTGCTGCCCCAGTCATTGACACCTTGGCCCACGGTTACGGTAAGGTCTTGGGTAAGGGTAGATTGCCAGAAGTTCCTGTCATTGTCAAGGCCAGATTTGTTTCCAAGTTG…	ATGCCTACTAGATTGACCAAGACTAGAAAACACAGAGGACACGTTTCTGCCGGTAAGGGTAGAATCGGTAAGCACAGAAAGCACCCCGGTGGTCGTGGTAAGGCTGGTGGTCAACACCACCACAGAACCAACTTGGATAAGTACCACCCTGGTTACTTCGGTAAGGTTGGTATGAGATACTTCCACAAGCAACAAAACCACTTCTGGAGACCAGAAATCAACTTGGACAAGTTGTGGACTTTGGTTGAAGCTGACAAGAAGGACGAATACTTGAAGTCTGCTTCTGCTACTGCTGCCCCAGTCATTGACACCTTGGCCCACGGTTACGGTAAGGTCTTGGGTAAGGGTAGATTGCCAGAAGTTCCTGTCATTGTCAAGGCCAGATTTGTTTCCAAGTTG…	OK	450	YES	CAA	Glutamine	Glutamine (CAA)
yHMPu5000037857_scheffersomyces_spartiniae_170210_g004352.m1	ATGCCTACTAGATTGACCAAGACTAGAAAACACAGAGGAAACGTTTCTGCCGGTAAGGGTAGAGTCGGTAAGCACAGAAAGCATCCCGGTGGTCGTGGTAAGGCTGGTGGTCAACACCACCACAGAACCAACTTGGATAAGTACCATCCAGGTTACTTCGGTAAGGTTGGTATGAGATACTTCCACAAGCAACAAGCTCATTTCTGGAGACCAGAAATCAACTTGGACAAGTTGTGGACTTTAGTTGAAGCTGACAAGAAGGACGAATACTTGAAGTCCGCTTCTGCTTCTGCTGCCCCAGTCATTGACACCTTGGCTCACGGTTACGGTAAAGTCTTGGGTAAGGGTAAGTTGCCTGAAGTTCCTGTCATTGTCAAGGCCAGATTTGTTTCCAAGTTG…	ATGCCTACTAGATTGACCAAGACTAGAAAACACAGAGGAAACGTTTCTGCCGGTAAGGGTAGAGTCGGTAAGCACAGAAAGCATCCCGGTGGTCGTGGTAAGGCTGGTGGTCAACACCACCACAGAACCAACTTGGATAAGTACCATCCAGGTTACTTCGGTAAGGTTGGTATGAGATACTTCCACAAGCAACAAGCTCATTTCTGGAGACCAGAAATCAACTTGGACAAGTTGTGGACTTTAGTTGAAGCTGACAAGAAGGACGAATACTTGAAGTCCGCTTCTGCTTCTGCTGCCCCAGTCATTGACACCTTGGCTCACGGTTACGGTAAAGTCTTGGGTAAGGGTAAGTTGCCTGAAGTTCCTGTCATTGTCAAGGCCAGATTTGTTTCCAAGTTG…	OK	450	YES	CAA	Glutamine	Glutamine (CAA)
yHMPu5000034661_dipodascus_albidus_180604_g001859.m1	ATGCCTACTAGATTGACCAAGACCAGAAAGCTTAGAGGACACGTCTCCGCCGGTCACGGACGTATCGGAAAGCACAGAAAGCATCCCGGTGGTAGAGGTATGGCCGGTGGTCAACATCATCACCGTACCAACATGGACAAGTACCATCCTGGTTACTTCGGTAAGGTCGGTATGAGATACTTCCACAAGCAACAAAACCACTTCTGGAAGCCCGTTCTCAATCTCGACAAGTTGTGGACTTTGGTCCCTGCTGAGAACAGAGAAAAGTACATTGCCCAATCTTCTGAATCTGCTGCTCCTGTTATTGATACTTTGGCTGCTGGTTACGGTAAGGTCCTTGGTAAGGGTCGTCTTCCCAATGTCCCCGTCATTGTCAAGGCCAGATTCGTCTCTGCTCTT…	ATGCCTACTAGATTGACCAAGACCAGAAAGCTTAGAGGACACGTCTCCGCCGGTCACGGACGTATCGGAAAGCACAGAAAGCATCCCGGTGGTAGAGGTATGGCCGGTGGTCAACATCATCACCGTACCAACATGGACAAGTACCATCCTGGTTACTTCGGTAAGGTCGGTATGAGATACTTCCACAAGCAACAAAACCACTTCTGGAAGCCCGTTCTCAATCTCGACAAGTTGTGGACTTTGGTCCCTGCTGAGAACAGAGAAAAGTACATTGCCCAATCTTCTGAATCTGCTGCTCCTGTTATTGATACTTTGGCTGCTGGTTACGGTAAGGTCCTTGGTAAGGGTCGTCTTCCCAATGTCCCCGTCATTGTCAAGGCCAGATTCGTCTCTGCTCTT…	OK	450	YES	CAA	Glutamine	Glutamine (CAA)
yHMPu5000037903_candida_multigemmis_180604_g004776.m1	ATGCCTACTAGATTGACAAAGACAAGAAAACACAGAGGTCACGTATCCGCCGGTAAAGGTAGAATCGGTAAGCACAGAAAGCATCCGGGTGGTAGAGGTAAAGCTGGTGGTCAACACCATCACAGAACTAACTTGGATAAATACCATCCAGGTTACTTTGGTAAAGTTGGTATGAGATACTTCCACAAACAAAGAAACCATTTCTGGAAACCAGAAATCAACTTGGACAAATTATGGACTTTAGTTGAAGCTGACAAGAAAGATGAATACTTAAAATCATCATCAACCTCCGCTGCTCCAGTTATTGACACTTTAGCTCATGGTTACGGTAAAGTCTTAGGTAAAGGTAGATTACCAGAAGTTCCAGTCATTGTTAAGGCAAGATTTGTTTCTAAATTA…	ATGCCTACTAGATTGACAAAGACAAGAAAACACAGAGGTCACGTATCCGCCGGTAAAGGTAGAATCGGTAAGCACAGAAAGCATCCGGGTGGTAGAGGTAAAGCTGGTGGTCAACACCATCACAGAACTAACTTGGATAAATACCATCCAGGTTACTTTGGTAAAGTTGGTATGAGATACTTCCACAAACAAAGAAACCATTTCTGGAAACCAGAAATCAACTTGGACAAATTATGGACTTTAGTTGAAGCTGACAAGAAAGATGAATACTTAAAATCATCATCAACCTCCGCTGCTCCAGTTATTGACACTTTAGCTCATGGTTACGGTAAAGTCTTAGGTAAAGGTAGATTACCAGAAGTTCCAGTCATTGTTAAGGCAAGATTTGTTTCTAAATTA…	OK	450	YES	CAA	Glutamine	Glutamine (CAA)
yHMPu5000034724_candida_castellii_180604_g002404.m1	ATGCCTACTAGATTCACTAAGACCAGAAAGCACAGAGGCCACGTCTCAGCCGGTAATGGCCGTATCGGCAAGCACAGAAAGCATCCCGGTGGTCGTGGTATGGCCGGTGGTCAGCACCACCACAGAACCAACTTGGACAAGTACCATCCTGGTTACTTCGGTAAGGTCGGTATGCGCTATTTCCACAAGCAAAAGTTGCACTTCTGGAAGCCAGTGCTCAACCTAGACAAGTTGTGGACTTTGGTCCCAGAGGACAAGAAAGACGAGTACTTGAAGTCTGCTTCCAAGTCAGCTGCCCCAGTTATTGACACATTGGCCGCCGGTTACGGTAAGGTCTTAGGTAAGGGCAGAATTCCAAACGTCCCCGTCATCGTCAAGGCTAGATTTGTCTCTAAGCTA…	ATGCCTACTAGATTCACTAAGACCAGAAAGCACAGAGGCCACGTCTCAGCCGGTAATGGCCGTATCGGCAAGCACAGAAAGCATCCCGGTGGTCGTGGTATGGCCGGTGGTCAGCACCACCACAGAACCAACTTGGACAAGTACCATCCTGGTTACTTCGGTAAGGTCGGTATGCGCTATTTCCACAAGCAAAAGTTGCACTTCTGGAAGCCAGTGCTCAACCTAGACAAGTTGTGGACTTTGGTCCCAGAGGACAAGAAAGACGAGTACTTGAAGTCTGCTTCCAAGTCAGCTGCCCCAGTTATTGACACATTGGCCGCCGGTTACGGTAAGGTCTTAGGTAAGGGCAGAATTCCAAACGTCCCCGTCATCGTCAAGGCTAGATTTGTCTCTAAGCTA…	OK	450	YES	CAG	Glutamine	Glutamine (CAG)
yHMPu5000035666_nakaseomyces_bacillisporus_160613_g002953.m1	ATGCCTACTAGATTCACTAAAACTAGAAAACATAGAGGTCACGTCTCAGCCGGTAACGGTCGTATCGGTAAGCACAGAAAGCACCCCGGTGGTAGAGGTATGGCTGGTGGTCAACATCACCACAGAACCAACTTGGATAAATACCATCCAGGTTACTTCGGTAAGGTTGGTATGAGATACTTCCACAAGCAACAAAACCACTTCTGGAAGCCAGTCTTGAACTTAGACAAGTTGTGGACTTTGATCCCAGAAGAGAAGAGAGACGAGTACTTGAAGTCATCTACTGTTTCTGCTGCTCCAGTCATTGACACTTTGGCTGCTGGTTATGGTAAGGTCTTGGGTAAAGGTAGAATTCCAAACGTCCCAGTCATTGTCAAGGCTAGATTTGTCTCCAAGTTA…	ATGCCTACTAGATTCACTAAAACTAGAAAACATAGAGGTCACGTCTCAGCCGGTAACGGTCGTATCGGTAAGCACAGAAAGCACCCCGGTGGTAGAGGTATGGCTGGTGGTCAACATCACCACAGAACCAACTTGGATAAATACCATCCAGGTTACTTCGGTAAGGTTGGTATGAGATACTTCCACAAGCAACAAAACCACTTCTGGAAGCCAGTCTTGAACTTAGACAAGTTGTGGACTTTGATCCCAGAAGAGAAGAGAGACGAGTACTTGAAGTCATCTACTGTTTCTGCTGCTCCAGTCATTGACACTTTGGCTGCTGGTTATGGTAAGGTCTTGGGTAAAGGTAGAATTCCAAACGTCCCAGTCATTGTCAAGGCTAGATTTGTCTCCAAGTTA…	OK	450	YES	CAA	Glutamine	Glutamine (CAA)
yHMPu5000040933_candida_diddensiae_201018_g003504.m1	ATGCCTACTAGATTCACTAAAACTAGAAAACACAGAGGTCACGTTTCAGCCGGTAATGGTAGAATCGGTAAGCACAGAAAGCATCCCGGTGGTAGAGGTATGGCTGGTGGTCAACATCACCACAGAACCAACTTGGATAAATACCATCCAGGTTACTTCGGTAAAGTTGGTATGAGATACTTCCACAAACAACAAAACCACTTCTGGAGACCAGAAATTAACTTGGACAAATTATGGACTTTAGTTGATGAAGAAAAGAAGGACGAATACTTAAAATCTGCTTCCTCATCTGCTGCTCCAGTTATTGACACCTTAGCTCACGGTTACGGTAAAGTTTTAGGTAAAGGTAGATTACCAGAAGTTCCAGTTATTGTCAAGGCTAGATTTGTTTCTAAATTA…	ATGCCTACTAGATTCACTAAAACTAGAAAACACAGAGGTCACGTTTCAGCCGGTAATGGTAGAATCGGTAAGCACAGAAAGCATCCCGGTGGTAGAGGTATGGCTGGTGGTCAACATCACCACAGAACCAACTTGGATAAATACCATCCAGGTTACTTCGGTAAAGTTGGTATGAGATACTTCCACAAACAACAAAACCACTTCTGGAGACCAGAAATTAACTTGGACAAATTATGGACTTTAGTTGATGAAGAAAAGAAGGACGAATACTTAAAATCTGCTTCCTCATCTGCTGCTCCAGTTATTGACACCTTAGCTCACGGTTACGGTAAAGTTTTAGGTAAAGGTAGATTACCAGAAGTTCCAGTTATTGTCAAGGCTAGATTTGTTTCTAAATTA…	OK	450	YES	CAA	Glutamine	Glutamine (CAA)
yHMPu5000035258_wickerhamomyces_subpelliculosus_160928.haplomerger2.g003394.m1	ATGCCTACTAGATTCACTAAAACTAGAAAACACAGAGGTAACGTCTCCGCCGGTAAGGGTCGTATCGGTAAACATAGAAAGCATCCGGGTGGTAGAGGTAAAGCTGGTGGTCAACATCATCATAGAACAAATATGGATAAATACCATCCAGGTTATTTCGGTAAAGTTGGTCAAAGATACTTCCACAAACAACAATTACATTTCTGGAAACCTGAATTAAACTTAGATAAATTATGGACTTTAGTTCCTGAAGACAAAAGAGAACAATATTTATCAAATGCTTCATCATCATCTGCTCCAGTTATTGATACTTTAGCTCATGGTTACGGTAAAGTTTTAGGTAAAGGTCGTTTACCAGAAGTTCCAGTTATTGTTAAAGCTAGATTTGTTTCAAAATTA…	ATGCCTACTAGATTCACTAAAACTAGAAAACACAGAGGTAACGTCTCCGCCGGTAAGGGTCGTATCGGTAAACATAGAAAGCATCCGGGTGGTAGAGGTAAAGCTGGTGGTCAACATCATCATAGAACAAATATGGATAAATACCATCCAGGTTATTTCGGTAAAGTTGGTCAAAGATACTTCCACAAACAACAATTACATTTCTGGAAACCTGAATTAAACTTAGATAAATTATGGACTTTAGTTCCTGAAGACAAAAGAGAACAATATTTATCAAATGCTTCATCATCATCTGCTCCAGTTATTGATACTTTAGCTCATGGTTACGGTAAAGTTTTAGGTAAAGGTCGTTTACCAGAAGTTCCAGTTATTGTTAAAGCTAGATTTGTTTCAAAATTA…	OK	450	YES	CAA	Glutamine	Glutamine (CAA)
yHMPu5000038402_candida_andamanensis_170713_g000842.m1	ATGCCTACTAGATTCACTAAAACTAGAAAACACAGAGGACATGTCTCTGCCGGTCATGGTAGAATCGGTAAACACAGAAAGCACCCCGGTGGTAGAGGTATGGCTGGTGGTCAACATCACCACAGAACCAACTTAGACAAATACCATCCAGGTTACTTTGGTAAAGTTGGTATGAGATACTTCCATAAACAACAAAACCACTTCTGGAGACCAGAAATCAACTTGGACAAATTGTGGACTTTAGTCGAAGAAGACAAAAAAGACGAATACTTAAAATCTGCTTCTAAATCCGCTGCCCCAGTCATTGATACTTTAGCTCACGGTTACGGTAAAGTTTTAGGTAAAGGAAGATTACCAGAAGTTCCAGTTATTGTCAAAGCTAGATTCGTCAGTAAATTA…	ATGCCTACTAGATTCACTAAAACTAGAAAACACAGAGGACATGTCTCTGCCGGTCATGGTAGAATCGGTAAACACAGAAAGCACCCCGGTGGTAGAGGTATGGCTGGTGGTCAACATCACCACAGAACCAACTTAGACAAATACCATCCAGGTTACTTTGGTAAAGTTGGTATGAGATACTTCCATAAACAACAAAACCACTTCTGGAGACCAGAAATCAACTTGGACAAATTGTGGACTTTAGTCGAAGAAGACAAAAAAGACGAATACTTAAAATCTGCTTCTAAATCCGCTGCCCCAGTCATTGATACTTTAGCTCACGGTTACGGTAAAGTTTTAGGTAAAGGAAGATTACCAGAAGTTCCAGTTATTGTCAAAGCTAGATTCGTCAGTAAATTA…	OK	450	YES	CAA	Glutamine	Glutamine (CAA)
yHMPu5000035269_wickerhamomyces_ciferrii_170307.g001356.m1	ATGCCTACTAGATTCACTAAAACCAGAAAACATAGAGGTAACGTCTCAGCCGGTAAAGGTCGTATCGGTAAACATAGAAAGCATCCGGGTGGTAGAGGTAAAGCTGGTGGTCAACATCATCACAGAACCAATTTAGATAAATACCATCCAGGTTACTTTGGTAAAGTTGGTCAAAGATATTTCCACAAACAACAATTACATTTCTGGAAACCAGTTTTAAACTTGGATAAATTATGGACTTTAGTTCCAGAAGATAAAAAAGATCAATATTTATCATCAGCTTCAGCTTCAGCTGCTCCAGTTATTGATACTTTAGCTCATGGTTACGGTAAAGTTTTAGGTAAAGGTAGATTACCAGAAGTTCCAGTTATTGTTAAAGCTAGATTTGTTTCAAAATTA…	ATGCCTACTAGATTCACTAAAACCAGAAAACATAGAGGTAACGTCTCAGCCGGTAAAGGTCGTATCGGTAAACATAGAAAGCATCCGGGTGGTAGAGGTAAAGCTGGTGGTCAACATCATCACAGAACCAATTTAGATAAATACCATCCAGGTTACTTTGGTAAAGTTGGTCAAAGATATTTCCACAAACAACAATTACATTTCTGGAAACCAGTTTTAAACTTGGATAAATTATGGACTTTAGTTCCAGAAGATAAAAAAGATCAATATTTATCATCAGCTTCAGCTTCAGCTGCTCCAGTTATTGATACTTTAGCTCATGGTTACGGTAAAGTTTTAGGTAAAGGTAGATTACCAGAAGTTCCAGTTATTGTTAAAGCTAGATTTGTTTCAAAATTA…	OK	450	YES	CAA	Glutamine	Glutamine (CAA)
yHMPu5000035269_wickerhamomyces_ciferrii_170307.g007970.m1	ATGCCTACTAGATTCACTAAAACCAGAAAACATAGAGGTAACGTCTCAGCCGGTAAAGGTCGTATCGGTAAACATAGAAAGCATCCGGGTGGTAGAGGTAAAGCTGGTGGTCAACATCATCACAGAACCAATTTAGATAAATACCATCCAGGTTACTTTGGTAAAGTTGGTCAAAGATATTTCCACAAACAACAATTACATTTCTGGAAACCAGTTTTAAACTTGGATAAATTATGGACTTTAGTTCCAGAAGATAAAAAAGATCAATATTTATCATCAGCTTCAGCTTCAGCTGCTCCAGTTATTGATACTTTAGCTCATGGTTACGGTAAAGTTTTAGGTAAAGGTAGATTACCAGAAGTTCCAGTTATTGTTAAAGCTAGATTTGTTTCAAAATTA…	ATGCCTACTAGATTCACTAAAACCAGAAAACATAGAGGTAACGTCTCAGCCGGTAAAGGTCGTATCGGTAAACATAGAAAGCATCCGGGTGGTAGAGGTAAAGCTGGTGGTCAACATCATCACAGAACCAATTTAGATAAATACCATCCAGGTTACTTTGGTAAAGTTGGTCAAAGATATTTCCACAAACAACAATTACATTTCTGGAAACCAGTTTTAAACTTGGATAAATTATGGACTTTAGTTCCAGAAGATAAAAAAGATCAATATTTATCATCAGCTTCAGCTTCAGCTGCTCCAGTTATTGATACTTTAGCTCATGGTTACGGTAAAGTTTTAGGTAAAGGTAGATTACCAGAAGTTCCAGTTATTGTTAAAGCTAGATTTGTTTCAAAATTA…	OK	450	YES	CAA	Glutamine	Glutamine (CAA)
yHMPu5000035262_candida_silvicultrix_170307.g002799.m1	ATGCCTACTAGATTCACTAAAACCAGAAAACATAGAGGTAACGTCTCAGCCGGTAAAGGTCGTATCGGTAAACACAGAAAGCATCCGGGTGGTAGAGGTAAAGCTGGTGGTCAACATCATCACAGAACCAATTTAGATAAATACCATCCAGGTTACTTTGGTAAAGTTGGTCAAAGATATTTCCACAAACAACAATTACATTTCTGGAAACCAGTTTTAAACTTGGATAAATTATGGACTTTAGTTCCAGAAGATAAAAAAGATCAATACTTATCATCAGCTTCAGCTTCAGCTGCTCCAGTCATTGACACTTTAGCTCATGGTTACGGTAAAGTTTTAGGTAAAGGTAGATTACCAGAAGTTCCAGTTATCGTTAAAGCTAGATTTGTTTCAAAATTA…	ATGCCTACTAGATTCACTAAAACCAGAAAACATAGAGGTAACGTCTCAGCCGGTAAAGGTCGTATCGGTAAACACAGAAAGCATCCGGGTGGTAGAGGTAAAGCTGGTGGTCAACATCATCACAGAACCAATTTAGATAAATACCATCCAGGTTACTTTGGTAAAGTTGGTCAAAGATATTTCCACAAACAACAATTACATTTCTGGAAACCAGTTTTAAACTTGGATAAATTATGGACTTTAGTTCCAGAAGATAAAAAAGATCAATACTTATCATCAGCTTCAGCTTCAGCTGCTCCAGTCATTGACACTTTAGCTCATGGTTACGGTAAAGTTTTAGGTAAAGGTAGATTACCAGAAGTTCCAGTTATCGTTAAAGCTAGATTTGTTTCAAAATTA…	OK	450	YES	CAA	Glutamine	Glutamine (CAA)
yHMPu5000035267_wickerhamomyces_lynferdii_170307.g007056.m1	ATGCCTACTAGATTCACTAAAACCAGAAAACACAGAGGTAACGTCTCAGCCGGTAAAGGTCGTATCGGTAAACACAGAAAGCATCCGGGTGGTAGAGGTAAAGCTGGTGGTCAACATCATCACAGAACCAATTTAGATAAATACCATCCAGGTTACTTCGGTAAAGTTGGTCAAAGATACTTCCACAAACAACAATTACATTTCTGGAAACCAGTCTTAAACTTGGATAAATTATGGACTTTAGTTCCAGAAGATAAAAAAGATCAATACTTATCAACTGCTTCTGCTTCCGCTGCTCCAGTTATTGACACTTTAGCTCACGGTTACGGTAAAGTTTTAGGTAAAGGTCGTTTACCAGAAGTTCCAGTTATTGTTAAAGCTAGATTTGTTTCTAAATTA…	ATGCCTACTAGATTCACTAAAACCAGAAAACACAGAGGTAACGTCTCAGCCGGTAAAGGTCGTATCGGTAAACACAGAAAGCATCCGGGTGGTAGAGGTAAAGCTGGTGGTCAACATCATCACAGAACCAATTTAGATAAATACCATCCAGGTTACTTCGGTAAAGTTGGTCAAAGATACTTCCACAAACAACAATTACATTTCTGGAAACCAGTCTTAAACTTGGATAAATTATGGACTTTAGTTCCAGAAGATAAAAAAGATCAATACTTATCAACTGCTTCTGCTTCCGCTGCTCCAGTTATTGACACTTTAGCTCACGGTTACGGTAAAGTTTTAGGTAAAGGTCGTTTACCAGAAGTTCCAGTTATTGTTAAAGCTAGATTTGTTTCTAAATTA…	OK	450	YES	CAA	Glutamine	Glutamine (CAA)
yHMPu5000026055_diutina_siamensis_170912.g003065.m1	ATGCCTACTAGATTCACCAAGACCAGAAAGCACAGAGGTAACGTTTCCGCCGGTAAGGGGAGAATTGGGAAGCACAGAAAGTCGCCTGGTGGTAGAGGTATGGCCGGGGGTCAACACCACCACAGAACCAACATGGATAAGTACCACCCTGGTTACTTCGGTAAGGTTGGTATGAGATACTTCCACAAGCAAAAGGCTCACTTCTGGAGACCTCAAATCAACTTGGACAAGTTGTGGTCGTTGGTGCCTGAAGACAAGAGAGAAGAATACTTGAAGTCTGCCTCTTCTTCTGCTGCCCCCGTCATTGACACCTTGGCCCACGGTTACGGTAAGGTTTTGGGTAAGGGTAAGTTGCCTGAAGTTCCCGTCATTGTCAAGGCCAGATTTGTTTCCAAGTTG…	ATGCCTACTAGATTCACCAAGACCAGAAAGCACAGAGGTAACGTTTCCGCCGGTAAGGGGAGAATTGGGAAGCACAGAAAGTCGCCTGGTGGTAGAGGTATGGCCGGGGGTCAACACCACCACAGAACCAACATGGATAAGTACCACCCTGGTTACTTCGGTAAGGTTGGTATGAGATACTTCCACAAGCAAAAGGCTCACTTCTGGAGACCTCAAATCAACTTGGACAAGTTGTGGTCGTTGGTGCCTGAAGACAAGAGAGAAGAATACTTGAAGTCTGCCTCTTCTTCTGCTGCCCCCGTCATTGACACCTTGGCCCACGGTTACGGTAAGGTTTTGGGTAAGGGTAAGTTGCCTGAAGTTCCCGTCATTGTCAAGGCCAGATTTGTTTCCAAGTTG…	OK	450	YES	CAA	Glutamine	Glutamine (CAA)
yHAB156_kazachstania_piceae_160519_g001685.m1	ATGCCTACTAGATTCACAAAAACCAGAAAGCACAGGGGTAACGTCTCAGCCGGTAACGGTCGTGTCGGTAAACACAGAAAGCATCCGGGTGGTAGAGGTAAGGCCGGTGGTTTGCAACACCACAGAATTAACATGGATAAATACCATCCAGGTTACTTCGGTAAGGTCGGTATGAGATACTTCCACAAGCAACAAGCTCATTTCTGGAAGCCAGTCTTAAACTTAGACAAATTATGGACTTTGATTCCAGAAGAAAAGAGAGATGAATACATGAAATCTTCTTCTGCTTCTTCTGCTCCAGTCATTGACACCTTAGCTGCCGGTTACGGTAAGGTCTTAGGTAAGGGTAGAATTCCAAACGTCCCAGTCATTGTTAAGGCTAGATTCGTTTCCAGATTA…	ATGCCTACTAGATTCACAAAAACCAGAAAGCACAGGGGTAACGTCTCAGCCGGTAACGGTCGTGTCGGTAAACACAGAAAGCATCCGGGTGGTAGAGGTAAGGCCGGTGGTTTGCAACACCACAGAATTAACATGGATAAATACCATCCAGGTTACTTCGGTAAGGTCGGTATGAGATACTTCCACAAGCAACAAGCTCATTTCTGGAAGCCAGTCTTAAACTTAGACAAATTATGGACTTTGATTCCAGAAGAAAAGAGAGATGAATACATGAAATCTTCTTCTGCTTCTTCTGCTCCAGTCATTGACACCTTAGCTGCCGGTTACGGTAAGGTCTTAGGTAAGGGTAGAATTCCAAACGTCCCAGTCATTGTTAAGGCTAGATTCGTTTCCAGATTA…	OK	450	YES	TTG	Leucine2	Leucine2 (TTG)
yHMPu5000037881_martiniozyma_asiatica_190924.g001794.m1	ATGCCTACTAGATTACACAAGACTAGAAAGCACAGAGGTAACGTTTGTGCCGGTAAGGGTAGAGTTGGTAAGCACAGAAAGCACCCGGGTGGTAGAGGTATGGCCGGTGGTCAACATCACCACAGAACTAACTTGGATAAGTACCATCCAGGTTACTTTGGTAAGGTTGGTATGAGATACTTCCACAAGCAACAAGCTCACTTCTGGAAGCCAGTCATCAACGTTGAAAAGTTGTGGTCTTTGGTTGAAGGTAAGGACGAAAAGCTTGCTTCCTCTTCCAAGGACGCTGCTGTTGTCATTGACACCTTGGCTTTGGGTTACGGTAAGGTTCTTGGTAAGGGTAGATTGCCAGAAGTTCCAGTTATCGTCAAGGCTAGATACGTTTCCAAGCTTGCTGAA…	ATGCCTACTAGATTACACAAGACTAGAAAGCACAGAGGTAACGTTTGTGCCGGTAAGGGTAGAGTTGGTAAGCACAGAAAGCACCCGGGTGGTAGAGGTATGGCCGGTGGTCAACATCACCACAGAACTAACTTGGATAAGTACCATCCAGGTTACTTTGGTAAGGTTGGTATGAGATACTTCCACAAGCAACAAGCTCACTTCTGGAAGCCAGTCATCAACGTTGAAAAGTTGTGGTCTTTGGTTGAAGGTAAGGACGAAAAGCTTGCTTCCTCTTCCAAGGACGCTGCTGTTGTCATTGACACCTTGGCTTTGGGTTACGGTAAGGTTCTTGGTAAGGGTAGATTGCCAGAAGTTCCAGTTATCGTCAAGGCTAGATACGTTTCCAAGCTTGCTGAA…	OK	444	YES	CAA	Glutamine	Glutamine (CAA)
yHMPu5000034665_kodamaea_laetipori_180604_g000141.m1	ATGCCTACTAGATTAACTAAGACCAGAAAGCACAGAGGTAACGTTTCTGCCGGTAAGGGTAGAGTCGGTAAGCACAGAAAGCATCCAGGTGGTCGTGGTAAGGCTGGTGGTCAACACCACCACAGAACCAACTTGGACAAGTACCACCCTGGTTACTTCGGTAAGGTTGGTATGAGATACTTCCACAAGCAAGGTAACCACTTCTGGAGACCAGAACTCAACTTGGACAAGTTGTGGACCTTGGTTGACGCTGAGAAGAAGGACGAGTACTTGAAGTCTGCTTCTGCTTCTGCTGCTCCAGTCATCGACACCTTGGCTCACGGTTACGGTAAGGTCTTGGGTAAGGGTGACTTGCCAAATGTCCCAGTCATTGTCAAGGCTAGATTTGTTTCCAAGTTG…	ATGCCTACTAGATTAACTAAGACCAGAAAGCACAGAGGTAACGTTTCTGCCGGTAAGGGTAGAGTCGGTAAGCACAGAAAGCATCCAGGTGGTCGTGGTAAGGCTGGTGGTCAACACCACCACAGAACCAACTTGGACAAGTACCACCCTGGTTACTTCGGTAAGGTTGGTATGAGATACTTCCACAAGCAAGGTAACCACTTCTGGAGACCAGAACTCAACTTGGACAAGTTGTGGACCTTGGTTGACGCTGAGAAGAAGGACGAGTACTTGAAGTCTGCTTCTGCTTCTGCTGCTCCAGTCATCGACACCTTGGCTCACGGTTACGGTAAGGTCTTGGGTAAGGGTGACTTGCCAAATGTCCCAGTCATTGTCAAGGCTAGATTTGTTTCCAAGTTG…	OK	450	YES	CAA	Glutamine	Glutamine (CAA)
yHMPu5000037886_candida_sagamina_180604_g004798.m1	ATGCCTACTAGATTAACTAAGACCAGAAAGCACAGAGGTAACGTTTCTGCCGGTAAGGGTAGAATCGGTAAGCACAGAAAGCACCCAGGTGGTCGTGGTAAGGCTGGTGGTCAACACCACCACAGAACCAACTTGGACAAGTACCACCCTGGTTACTTCGGTAAGGTTGGTATGAGATACTTCCACAAGCAAGGTAACCACTTCTGGAGACCAGAACTCAACTTGGACAAGTTGTGGACCTTGGTTGACGCTGAGAAGAAGGACGAGTACTTGAAGTCTGCTTCTGCTTCTGCTGCTCCAGTCATCGACACCTTGGCTCACGGTTACGGTAAGGTCTTGGGTAAGGGTGACTTGCCAAACGTTCCAGTCATTGTCAAGGCCAGATTTGTCTCCAAGTTG…	ATGCCTACTAGATTAACTAAGACCAGAAAGCACAGAGGTAACGTTTCTGCCGGTAAGGGTAGAATCGGTAAGCACAGAAAGCACCCAGGTGGTCGTGGTAAGGCTGGTGGTCAACACCACCACAGAACCAACTTGGACAAGTACCACCCTGGTTACTTCGGTAAGGTTGGTATGAGATACTTCCACAAGCAAGGTAACCACTTCTGGAGACCAGAACTCAACTTGGACAAGTTGTGGACCTTGGTTGACGCTGAGAAGAAGGACGAGTACTTGAAGTCTGCTTCTGCTTCTGCTGCTCCAGTCATCGACACCTTGGCTCACGGTTACGGTAAGGTCTTGGGTAAGGGTGACTTGCCAAACGTTCCAGTCATTGTCAAGGCCAGATTTGTCTCCAAGTTG…	OK	450	YES	CAA	Glutamine	Glutamine (CAA)
spathaspora_boniae_g000449.m1	ATGCCTACTAGATTAACTAAGACCAGAAAGCACAGAGGTAACGTCTCTGCCGGTAAGGGTAGAGTCGGTAAGCACAGAAAGCACCCAGGTGGTAGAGGTAAGGCTGGTGGTCAGCACCACCACAGAACCAACTTGGACAAGTACCACCCTGGTTACTTTGGTAAGGTTGGTATGAGATACTTCCACAAGCAACAGAACCACTTCTGGAGACCAGAAATTAACTTGGACAAGTTGTGGACCTTGGTTGAGGCTGACAAGAAGGACGAGTACTTGAAGACCGCCTCCGCCTCTGCTGCCCCAGTCATTGACACCTTGGCCCACGGTTACGGCAAGGTTTTGGGTAAGGGCAGATTGCCCCAGGTTCCTGTGATTGTCAAGGCCAGATTTGTGTCTAAGTTG…	ATGCCTACTAGATTAACTAAGACCAGAAAGCACAGAGGTAACGTCTCTGCCGGTAAGGGTAGAGTCGGTAAGCACAGAAAGCACCCAGGTGGTAGAGGTAAGGCTGGTGGTCAGCACCACCACAGAACCAACTTGGACAAGTACCACCCTGGTTACTTTGGTAAGGTTGGTATGAGATACTTCCACAAGCAACAGAACCACTTCTGGAGACCAGAAATTAACTTGGACAAGTTGTGGACCTTGGTTGAGGCTGACAAGAAGGACGAGTACTTGAAGACCGCCTCCGCCTCTGCTGCCCCAGTCATTGACACCTTGGCCCACGGTTACGGCAAGGTTTTGGGTAAGGGCAGATTGCCCCAGGTTCCTGTGATTGTCAAGGCCAGATTTGTGTCTAAGTTG…	OK	450	YES	CAG	Glutamine	Glutamine (CAG)
yHMPu5000034756_hemisphaericaspora_nanyangensis_170713_g002701.m1	ATGCCTACTAGATTAACTAAGACCAGAAAGCACAGAGGACACGTTTCTGCCGGTAAGGGTAGAGTTGGTAAGCACAGAAAGCACCCTGGTGGTAGAGGTATGGCTGGTGGTGCCCACCACCACAGAACCAACTTGGATAAATACCATCCAGGTTACTTCGGTAAGGTCGGTATGAGATACTTCCACAAGCAAAACGGTCACTTCTGGAGACCAGAAATCAACTTGGACAAATTATGGTCTCTCGTTGATGAATCCAAGAAGGATGAATACTTAAAGTCTGCTTCTACCTCTGCTGCTCCAGTTATTGACACTTTAGCTCACGGTTACGGTAAGGTTTTAGGAAAGGGTAGATTACCACAAGTTCCAGTCATTGTCAAGGCTAGATTTGTCTCCAAGTTA…	ATGCCTACTAGATTAACTAAGACCAGAAAGCACAGAGGACACGTTTCTGCCGGTAAGGGTAGAGTTGGTAAGCACAGAAAGCACCCTGGTGGTAGAGGTATGGCTGGTGGTGCCCACCACCACAGAACCAACTTGGATAAATACCATCCAGGTTACTTCGGTAAGGTCGGTATGAGATACTTCCACAAGCAAAACGGTCACTTCTGGAGACCAGAAATCAACTTGGACAAATTATGGTCTCTCGTTGATGAATCCAAGAAGGATGAATACTTAAAGTCTGCTTCTACCTCTGCTGCTCCAGTTATTGACACTTTAGCTCACGGTTACGGTAAGGTTTTAGGAAAGGGTAGATTACCACAAGTTCCAGTCATTGTCAAGGCTAGATTTGTCTCCAAGTTA…	OK	450	YES	GCC	Other	Other (GCC)
yHMPu5000040918_candida_insectamans_201018_g006630.m1	ATGCCTACTAGATTAACTAAGACCAGAAAGCACAGAGGACACGTTTCTGCCGGTAAGGGTAGAGTTGGTAAGCACAGAAAGAATCCTGGTGGTAGAGGTATGGCTGGTGGTCAACACCACCACAGAACCAACTTGGATAAATACCATCCAGGTTACTTCGGTAAGGTTGGTATGAGATACTTCCACAAACAAAATGCTCACTTTTGGAGACCAGAAATCAACTTGGACAAATTGTGGTCCCTTGTTGACGACTCCAAGAGAGACGAATATTTAAAATCCGCTTCTGCTTCCGCTGCTCCAGTTATTGACACTTTAGCTCACGGTTACGGCAAGGTTTTAGGTAAGGGTAGATTACCACAAGTTCCAGTCATTGTTAAGGCTAGATTTGTTTCCAAATTA…	ATGCCTACTAGATTAACTAAGACCAGAAAGCACAGAGGACACGTTTCTGCCGGTAAGGGTAGAGTTGGTAAGCACAGAAAGAATCCTGGTGGTAGAGGTATGGCTGGTGGTCAACACCACCACAGAACCAACTTGGATAAATACCATCCAGGTTACTTCGGTAAGGTTGGTATGAGATACTTCCACAAACAAAATGCTCACTTTTGGAGACCAGAAATCAACTTGGACAAATTGTGGTCCCTTGTTGACGACTCCAAGAGAGACGAATATTTAAAATCCGCTTCTGCTTCCGCTGCTCCAGTTATTGACACTTTAGCTCACGGTTACGGCAAGGTTTTAGGTAAGGGTAGATTACCACAAGTTCCAGTCATTGTTAAGGCTAGATTTGTTTCCAAATTA…	OK	450	YES	CAA	Glutamine	Glutamine (CAA)
yHMPu5000038063_candida_xylanilytica_180604.haplomerger2_g006840.m1	ATGCCTACTAGATTAACTAAGACCAGAAAGCACAGAGGACACGTTTCTGCCGGTAAGGGTAGAGTTGGTAAGCACAGAAAGAACCCTGGTGGTAGAGGTATGGCTGGTGGTCAACACCACCACAGAACCAACTTGGATAAATACCATCCAGGTTACTTCGGTAAGGTCGGTATGAGATACTTCCACAAGCAAAACGCTCACTTCTGGAGACCAGAAATCAACTTGGACAAATTATGGTCCCTCGTTGACGAATCCAAGAAGGATGAATACTTAAAGTCTGCTTCTGCCTCTGCTGCTCCAGTCATTGACACTTTAGCTCATGGTTACGGTAAGGTTTTAGGTAAGGGTAGATTACCACAAGTTCCAGTCATCGTCAAGGCTAGATTTGTTTCCAAATTG…	ATGCCTACTAGATTAACTAAGACCAGAAAGCACAGAGGACACGTTTCTGCCGGTAAGGGTAGAGTTGGTAAGCACAGAAAGAACCCTGGTGGTAGAGGTATGGCTGGTGGTCAACACCACCACAGAACCAACTTGGATAAATACCATCCAGGTTACTTCGGTAAGGTCGGTATGAGATACTTCCACAAGCAAAACGCTCACTTCTGGAGACCAGAAATCAACTTGGACAAATTATGGTCCCTCGTTGACGAATCCAAGAAGGATGAATACTTAAAGTCTGCTTCTGCCTCTGCTGCTCCAGTCATTGACACTTTAGCTCATGGTTACGGTAAGGTTTTAGGTAAGGGTAGATTACCACAAGTTCCAGTCATCGTCAAGGCTAGATTTGTTTCCAAATTG…	OK	450	YES	CAA	Glutamine	Glutamine (CAA)
yHMPu5000038083_candida_subhashii_180604.haplomerger2_g001649.m1	ATGCCTACTAGATTAACTAAGACCAGAAAGCACAGAGGACACGTTTCTGCCGGTAAGGGTAGAGTCGGTAAGCACAGAAAATCCCCTGGTGGTAGAGGTATGGCTGGTGGTCAACACCACCACAGAACCAACTTGGATAAATACCATCCAGGTTACTTCGGTAAGGTCGGTATGAGATACTTCCACAAGCAAAACGCTCACTTCTGGAAGCCAGAAATCAACTTGGACAAATTATGGTCTCTTGTTGATGAATCCAAGAAGGATGAATACTTAAAATCCGCTTCTGCCTCCGCTGCTCCAGTTATTGACACTTTAGCTCACGGTTACGGTAAGGTTTTAGGTAAGGGTAGATTACCACAAGTTCCAGTCATTGTCAAGGCTAGATTTGTTTCTAAATTA…	ATGCCTACTAGATTAACTAAGACCAGAAAGCACAGAGGACACGTTTCTGCCGGTAAGGGTAGAGTCGGTAAGCACAGAAAATCCCCTGGTGGTAGAGGTATGGCTGGTGGTCAACACCACCACAGAACCAACTTGGATAAATACCATCCAGGTTACTTCGGTAAGGTCGGTATGAGATACTTCCACAAGCAAAACGCTCACTTCTGGAAGCCAGAAATCAACTTGGACAAATTATGGTCTCTTGTTGATGAATCCAAGAAGGATGAATACTTAAAATCCGCTTCTGCCTCCGCTGCTCCAGTTATTGACACTTTAGCTCACGGTTACGGTAAGGTTTTAGGTAAGGGTAGATTACCACAAGTTCCAGTCATTGTCAAGGCTAGATTTGTTTCTAAATTA…	OK	450	YES	CAA	Glutamine	Glutamine (CAA)
spathaspora_xylofermentans_g000074.m1	ATGCCTACTAGATTAACTAAGACCAGAAAGCACAGAGGACACGTTTCTGCCGGTAAGGGTAGAATTGGTAAGCACAGAAAGCACCCGGGTGGTAGAGGTATGGCTGGTGGTGCCCACCACCACAGAACCAACTTGGATAAGTACCATCCAGGTTACTTCGGTAAGGTCGGTATGAGATACTTCCACAAGCAAAACGCTCACTTCTGGAGACCAGAAATCAACTTAGACAAATTATGGTCTCTTGTTGATGAATCTAAGAAGGAAGAATACTTAAAGTCTGCTTCTGCTGCCGCTGCTCCAGTTATTGACACTTTAGCTCACGGTTACGGTAAGGTTTTAGGTAAGGGTAGATTACCACAAGTTCCAGTCATCGTCAAGGCTAGATTTGTTTCCAAATTA…	ATGCCTACTAGATTAACTAAGACCAGAAAGCACAGAGGACACGTTTCTGCCGGTAAGGGTAGAATTGGTAAGCACAGAAAGCACCCGGGTGGTAGAGGTATGGCTGGTGGTGCCCACCACCACAGAACCAACTTGGATAAGTACCATCCAGGTTACTTCGGTAAGGTCGGTATGAGATACTTCCACAAGCAAAACGCTCACTTCTGGAGACCAGAAATCAACTTAGACAAATTATGGTCTCTTGTTGATGAATCTAAGAAGGAAGAATACTTAAAGTCTGCTTCTGCTGCCGCTGCTCCAGTTATTGACACTTTAGCTCACGGTTACGGTAAGGTTTTAGGTAAGGGTAGATTACCACAAGTTCCAGTCATCGTCAAGGCTAGATTTGTTTCCAAATTA…	OK	450	YES	GCC	Other	Other (GCC)
spathaspora_arborariae_g004205.m1	ATGCCTACTAGATTAACTAAGACCAGAAAGCACAGAGGACACGTTTCTGCCGGTAAGGGTAGAATTGGTAAGCACAGAAAGCACCCGGGTGGTAGAGGTATGGCCGGTGGTCAACATCACCACAGAACTAACTTGGATAAATACCATCCAGGTTACTTTGGTAAGGTTGGTATGAGATACTTCCACAAGCAAAATGCTCATTTCTGGAGACCAGAAATCAACTTGGACAAATTATGGACTTTAGTTGACGAAGAAAAGAGAGATGAATACTTGAAATCTGCTTCTACCTCCGCTGCCCCAGTCATTGATACCTTAGCTCACGGTTACGGTAAGGTCTTAGGTAAAGGTAGATTACCAGAAGTTCCAGTCATTGTCAAGGCTAGATTTGTTTCTAAATTA…	ATGCCTACTAGATTAACTAAGACCAGAAAGCACAGAGGACACGTTTCTGCCGGTAAGGGTAGAATTGGTAAGCACAGAAAGCACCCGGGTGGTAGAGGTATGGCCGGTGGTCAACATCACCACAGAACTAACTTGGATAAATACCATCCAGGTTACTTTGGTAAGGTTGGTATGAGATACTTCCACAAGCAAAATGCTCATTTCTGGAGACCAGAAATCAACTTGGACAAATTATGGACTTTAGTTGACGAAGAAAAGAGAGATGAATACTTGAAATCTGCTTCTACCTCCGCTGCCCCAGTCATTGATACCTTAGCTCACGGTTACGGTAAGGTCTTAGGTAAAGGTAGATTACCAGAAGTTCCAGTCATTGTCAAGGCTAGATTTGTTTCTAAATTA…	OK	450	YES	CAA	Glutamine	Glutamine (CAA)
yHMPu5000034617_spathaspora_passalidarum_170713_g000172.m1	ATGCCTACTAGATTAACTAAGACCAGAAAGCACAGAGGACACGTTTCTGCCGGTAAGGGTAGAATTGGTAAGCACAGAAAGCACCCGGGTGGTAGAGGTATGGCCGGTGGTCAACACCACCACAGAACCAACTTGGATAAATACCATCCAGGTTACTTCGGTAAGGTCGGTATGAGATACTTCCACAAGCAAAACGCTCACTTCTGGAGACCAGAAATCAACTTGGACAAATTATGGACTTTAGTTGACGAAGAAAAGAGAGACGAATACTTGAAGTCTGCCTCTGCTTCCGCTGCCCCAGTCATTGACACCTTAGCTCACGGTTACGGTAAGGTTTTAGGTAAGGGTAGATTACCACAAGTTCCAGTCATTGTCAAGGCCAGATTTGTTTCTAAGTTA…	ATGCCTACTAGATTAACTAAGACCAGAAAGCACAGAGGACACGTTTCTGCCGGTAAGGGTAGAATTGGTAAGCACAGAAAGCACCCGGGTGGTAGAGGTATGGCCGGTGGTCAACACCACCACAGAACCAACTTGGATAAATACCATCCAGGTTACTTCGGTAAGGTCGGTATGAGATACTTCCACAAGCAAAACGCTCACTTCTGGAGACCAGAAATCAACTTGGACAAATTATGGACTTTAGTTGACGAAGAAAAGAGAGACGAATACTTGAAGTCTGCCTCTGCTTCCGCTGCCCCAGTCATTGACACCTTAGCTCACGGTTACGGTAAGGTTTTAGGTAAGGGTAGATTACCACAAGTTCCAGTCATTGTCAAGGCCAGATTTGTTTCTAAGTTA…	OK	450	YES	CAA	Glutamine	Glutamine (CAA)
yHMPu5000037926_candida_alai_190924_g005884.m1	ATGCCTACTAGATTAACTAAGACCAGAAAGCACAGAGGACACGTTTCTGCCGGTAAGGGTAGAATTGGTAAGCACAGAAAGCACCCCGGTGGTAGAGGTATGGCTGGTGGTCAACACCACCACAGAACCAACTTGGACAAGTACCACCCAGGTTACTTCGGTAAGGTTGGTATGAGATACTTCCACAAGCAAAAGGCTCACTTCTGGAAGCCAGAACTCAACTTGGACAAATTGTGGACTTTGGTTGACGAATCCAAGAGAGACGAATACTTGAAGACCGCTTCTACCTCTGCTGCCCCAGTCATTGACACTTTGGCTGCCGGTTACGGAAAGATCTTGGGTAAGGGTAGATTGCCAAATGTTCCAGTCATTGTCAAGGCCAGATTTGTTTCCAAGTTA…	ATGCCTACTAGATTAACTAAGACCAGAAAGCACAGAGGACACGTTTCTGCCGGTAAGGGTAGAATTGGTAAGCACAGAAAGCACCCCGGTGGTAGAGGTATGGCTGGTGGTCAACACCACCACAGAACCAACTTGGACAAGTACCACCCAGGTTACTTCGGTAAGGTTGGTATGAGATACTTCCACAAGCAAAAGGCTCACTTCTGGAAGCCAGAACTCAACTTGGACAAATTGTGGACTTTGGTTGACGAATCCAAGAGAGACGAATACTTGAAGACCGCTTCTACCTCTGCTGCCCCAGTCATTGACACTTTGGCTGCCGGTTACGGAAAGATCTTGGGTAAGGGTAGATTGCCAAATGTTCCAGTCATTGTCAAGGCCAGATTTGTTTCCAAGTTA…	OK	450	YES	CAA	Glutamine	Glutamine (CAA)
spathaspora_hagerdaliae_g004274.m1	ATGCCTACTAGATTAACTAAGACCAGAAAGCACAGAGGACACGTTTCTGCCGGTAAGGGTAGAATTGGTAAACACAGAAAGCATCCTGGTGGTAGAGGTATGGCTGGTGGTTTCCACCACCACAGAACCAACTTGGATAAATACCATCCAGGTTACTTCGGTAAGGTCGGTATGAGATACTTCCACAAGCAACAAGCTCATTTCTGGAGACCAGAAATCAACTTGGACAAATTATGGTCTTTAGTTGATGAAGAAAAGAAGGACGAATACTTAAAGTCTGCTTCTGCTTCCGCTGCTCCAGTTATCGACACCTTAGCTCACGGTTACGGTAAGGTCTTAGGTAAGGGTAGATTACCACAAGTTCCAGTTATCGTCAAGGCTAGATTCGTTTCCAAATTA…	ATGCCTACTAGATTAACTAAGACCAGAAAGCACAGAGGACACGTTTCTGCCGGTAAGGGTAGAATTGGTAAACACAGAAAGCATCCTGGTGGTAGAGGTATGGCTGGTGGTTTCCACCACCACAGAACCAACTTGGATAAATACCATCCAGGTTACTTCGGTAAGGTCGGTATGAGATACTTCCACAAGCAACAAGCTCATTTCTGGAGACCAGAAATCAACTTGGACAAATTATGGTCTTTAGTTGATGAAGAAAAGAAGGACGAATACTTAAAGTCTGCTTCTGCTTCCGCTGCTCCAGTTATCGACACCTTAGCTCACGGTTACGGTAAGGTCTTAGGTAAGGGTAGATTACCACAAGTTCCAGTTATCGTCAAGGCTAGATTCGTTTCCAAATTA…	OK	450	YES	TTC	Phenylalanine	Phenylalanine (TTC)
spathaspora_gorwiae_g002787.m1	ATGCCTACTAGATTAACTAAGACCAGAAAGCACAGAGGACACGTTTCTGCCGGTAAGGGTAGAATTGGTAAACACAGAAAGCATCCAGGTGGTAGAGGTATGGCTGGTGGTTTCCACCACCACAGAACCAACTTGGATAAATACCATCCAGGTTACTTCGGTAAGGTCGGTATGAGATACTTCCACAAGCAACAAGCTCATTTCTGGAGACCAGAAATCAACTTGGACAAATTATGGTCTTTAGTTGATGAAGAAAAGAAGGACGAATACTTAAAGTCTGCTTCTGCTTCCGCTGCTCCAGTCATTGACACCTTAGCCCACGGTTACGGTAAGGTCTTAGGTAAGGGTAGATTACCACAAGTTCCAGTTATCGTCAAGGCTAGATTTGTCTCCAAATTA…	ATGCCTACTAGATTAACTAAGACCAGAAAGCACAGAGGACACGTTTCTGCCGGTAAGGGTAGAATTGGTAAACACAGAAAGCATCCAGGTGGTAGAGGTATGGCTGGTGGTTTCCACCACCACAGAACCAACTTGGATAAATACCATCCAGGTTACTTCGGTAAGGTCGGTATGAGATACTTCCACAAGCAACAAGCTCATTTCTGGAGACCAGAAATCAACTTGGACAAATTATGGTCTTTAGTTGATGAAGAAAAGAAGGACGAATACTTAAAGTCTGCTTCTGCTTCCGCTGCTCCAGTCATTGACACCTTAGCCCACGGTTACGGTAAGGTCTTAGGTAAGGGTAGATTACCACAAGTTCCAGTTATCGTCAAGGCTAGATTTGTCTCCAAATTA…	OK	450	YES	TTC	Phenylalanine	Phenylalanine (TTC)
yHMPu5000038099_candida_nonsorbophila_201018_g003440.m1	ATGCCTACTAGATTAACTAAGACCAGAAAGCACAGAGGACACGTTTCAGCCGGTAAAGGTAGAATCGGTAAGCACAGAAAGCATCCCGGTGGTAGAGGTAAGGCCGGTGGTCAACATCACCACAGAATCAACATGGATAAATATCACCCTGGTTACTTCGGTAAGGTTGGTATGAGATACTTCCACAAGCAACAAGGTCACTTCTGGAGACCAGAAATCAACTTGGACAAATTATGGACTTTAGTTGATGAAGACAAGAAGGAACAATTCTTAAAATCTTCTTCTGCTTCTTCTGCTCCAGTTATTGACACTTTAGCTCACGGTTACGGTAAAGTTTTGGGTAAAGGTAGATTACCAGAAGTCCCAGTCATTGTCAAGGCTAGATTCGTTTCTAAATTG…	ATGCCTACTAGATTAACTAAGACCAGAAAGCACAGAGGACACGTTTCAGCCGGTAAAGGTAGAATCGGTAAGCACAGAAAGCATCCCGGTGGTAGAGGTAAGGCCGGTGGTCAACATCACCACAGAATCAACATGGATAAATATCACCCTGGTTACTTCGGTAAGGTTGGTATGAGATACTTCCACAAGCAACAAGGTCACTTCTGGAGACCAGAAATCAACTTGGACAAATTATGGACTTTAGTTGATGAAGACAAGAAGGAACAATTCTTAAAATCTTCTTCTGCTTCTTCTGCTCCAGTTATTGACACTTTAGCTCACGGTTACGGTAAAGTTTTGGGTAAAGGTAGATTACCAGAAGTCCCAGTCATTGTCAAGGCTAGATTCGTTTCTAAATTG…	OK	450	YES	CAA	Glutamine	Glutamine (CAA)
spathaspora_girioi_g001277.m1	ATGCCTACTAGATTAACTAAGACCAGAAAGCACAGAGGAAATGTTTCTGCCGGTAAGGGTAGAGTCGGTAAGCACAGAAAGCACCCGGGTGGTAGAGGTATGGCCGGTGGTCAACATCATCACAGAACCAATTTGGATAAATACCATCCAGGTTACTTCGGTAAGGTCGGTATGAGATACTTCCACAAGCAAAATGCTCATTTCTGGAAGCCAGAAATCAACTTGGACAAATTATGGACTTTAGTCGATGAAGGAAAGAGAGACGAATACTTAAAGTCTGCCTCTGCTTCTGCTGCCCCAGTCATTGATACCTTAGCCCACGGTTACGGAAAGGTTTTAGGTAAGGGTAGATTACCAGAAGTTCCAGTTATCGTCAAGGCTAGATTTGTTTCTAAATTA…	ATGCCTACTAGATTAACTAAGACCAGAAAGCACAGAGGAAATGTTTCTGCCGGTAAGGGTAGAGTCGGTAAGCACAGAAAGCACCCGGGTGGTAGAGGTATGGCCGGTGGTCAACATCATCACAGAACCAATTTGGATAAATACCATCCAGGTTACTTCGGTAAGGTCGGTATGAGATACTTCCACAAGCAAAATGCTCATTTCTGGAAGCCAGAAATCAACTTGGACAAATTATGGACTTTAGTCGATGAAGGAAAGAGAGACGAATACTTAAAGTCTGCCTCTGCTTCTGCTGCCCCAGTCATTGATACCTTAGCCCACGGTTACGGAAAGGTTTTAGGTAAGGGTAGATTACCAGAAGTTCCAGTTATCGTCAAGGCTAGATTTGTTTCTAAATTA…	OK	450	YES	CAA	Glutamine	Glutamine (CAA)
yHMPu5000041850_candida_lyxosophila_170307.haplomerger2_g002879.m1	ATGCCTACTAGATTAACTAAGACCAGAAAGCACAGAGGAAATGTTTCTGCCGGTAACGGTAGAGTTGGTAAGCACAGAAAGCATCCAGGTGGTAGAGGTAAGGCCGGTGGTCAACATCATCACAGAACTAACTTGGATAAATACCATCCAGGTTACTTTGGTAAGGTCGGTATGAGATACTTCCACAAGCAACAAGCTCATTTCTGGAAGCCAGAAATCAACTTGGACAAATTATGGTCCCTTGTTGATGAATCCAAGAAGGAAGAATACTTAAAGTCTGCTTCCGCTTCCGCTGCTCCAGTTATTGACACTTTAGCCCACGGTTACGGTAAGGTTTTAGGTAAGGGTAGATTACCACAAGTTCCAGTTATCGTCAAGGCTAGATTTGTTTCTAAGTTA…	ATGCCTACTAGATTAACTAAGACCAGAAAGCACAGAGGAAATGTTTCTGCCGGTAACGGTAGAGTTGGTAAGCACAGAAAGCATCCAGGTGGTAGAGGTAAGGCCGGTGGTCAACATCATCACAGAACTAACTTGGATAAATACCATCCAGGTTACTTTGGTAAGGTCGGTATGAGATACTTCCACAAGCAACAAGCTCATTTCTGGAAGCCAGAAATCAACTTGGACAAATTATGGTCCCTTGTTGATGAATCCAAGAAGGAAGAATACTTAAAGTCTGCTTCCGCTTCCGCTGCTCCAGTTATTGACACTTTAGCCCACGGTTACGGTAAGGTTTTAGGTAAGGGTAGATTACCACAAGTTCCAGTTATCGTCAAGGCTAGATTTGTTTCTAAGTTA…	OK	450	YES	CAA	Glutamine	Glutamine (CAA)
yHMPu5000041836_candida_tenuis_160928_g001930.m1	ATGCCTACTAGATTAACTAAGACCAGAAAACACAGAGGCCACGTTTCAGCCGGTAACGGTAGAATTGGTAAGCACAGAAAGCATCCCGGTGGTAGAGGTATGGCTGGTGGTCAACATCACCACAGAACTAACTTGGATAAGTACCATCCTGGTTACTTCGGTAAAGTTGGTATGAGATACTTCCACAAACAACAAGCTCACTTCTGGAGACCAGAAATCAACTTGGACAAGTTGTGGACTTTGGTTGACGAAGAAAAGAAGGACGAATACTTGAAGTCCTCTACTACTTCTGCTGCCCCAGTCATTGACACCTTGGCTCACGGTTACGGTAAAGTCTTGGGTAAGGGAAGATTGCCAGACGTTCCAGTTATCGTCAAGGCTAGATTCGTTTCTAAATTG…	ATGCCTACTAGATTAACTAAGACCAGAAAACACAGAGGCCACGTTTCAGCCGGTAACGGTAGAATTGGTAAGCACAGAAAGCATCCCGGTGGTAGAGGTATGGCTGGTGGTCAACATCACCACAGAACTAACTTGGATAAGTACCATCCTGGTTACTTCGGTAAAGTTGGTATGAGATACTTCCACAAACAACAAGCTCACTTCTGGAGACCAGAAATCAACTTGGACAAGTTGTGGACTTTGGTTGACGAAGAAAAGAAGGACGAATACTTGAAGTCCTCTACTACTTCTGCTGCCCCAGTCATTGACACCTTGGCTCACGGTTACGGTAAAGTCTTGGGTAAGGGAAGATTGCCAGACGTTCCAGTTATCGTCAAGGCTAGATTCGTTTCTAAATTG…	OK	450	YES	CAA	Glutamine	Glutamine (CAA)
yHMPu5000035247_candida_germanica_170912_g005469.m1	ATGCCTACTAGATTAACTAAGACCAGAAAACACAGAGGACACGTTTCAGCCGGTAACGGTAGAATCGGTAAGCACAGAAAGCATCCCGGTGGTAGAGGTATGGCTGGTGGTCAACATCACCACAGAACCAACTTGGATAAATACCATCCAGGTTACTTCGGTAAAGTTGGTATGAGATACTTCCACAAACAACAAAACCACTTCTGGAGACCAGAAATCAACTTGGACAAATTATGGACTTTAGTTGACGAAGAAAAGAAGGATGAATACTTGAAGTCTGCTTCTTCTTCTGCTGCTCCAGTCATTGACACTTTAGCTCATGGTTACGGTAAGGTTTTAGGTAAAGGTAAATTACCACAAGTCCCAGTCATTGTCAAGGCCAGATTTGTTTCCAAATTG…	ATGCCTACTAGATTAACTAAGACCAGAAAACACAGAGGACACGTTTCAGCCGGTAACGGTAGAATCGGTAAGCACAGAAAGCATCCCGGTGGTAGAGGTATGGCTGGTGGTCAACATCACCACAGAACCAACTTGGATAAATACCATCCAGGTTACTTCGGTAAAGTTGGTATGAGATACTTCCACAAACAACAAAACCACTTCTGGAGACCAGAAATCAACTTGGACAAATTATGGACTTTAGTTGACGAAGAAAAGAAGGATGAATACTTGAAGTCTGCTTCTTCTTCTGCTGCTCCAGTCATTGACACTTTAGCTCATGGTTACGGTAAGGTTTTAGGTAAAGGTAAATTACCACAAGTCCCAGTCATTGTCAAGGCCAGATTTGTTTCCAAATTG…	OK	450	YES	CAA	Glutamine	Glutamine (CAA)
yHMPu5000037243_lodderomyces_sp_210210_g000041.m1	ATGCCTACTAGATTAACTAAGACCAGAAAACACAGAGGAAATGTTTCTGCCGGTAAGGGTAGAGTTGGTAAACACAGAAAGCATCCCGGTGGTAGAGGTAAAGCTGGTGGTCAACACCACCACAGAACAAATTTAGATAAATACCACCCAGGTTACTTTGGTAAAGTTGGTATGAGATACTACCACAAGCAACAAGGTCACTTCTGGAGGCCAGAAATCAATTTGGACAAATTGTGGACTCTCGTTGACAGCGATAAGAAGGACGAATACTTGCAATCATCCAGTGCTTCCGCCGCTCCAGTTATCGACACTTTGGCTGCTGGCTACGGTAAGGTCTTGGGTAAAGGTAGATTGCCAGAAGTTCCAGTTATCGTCAAGGCTAGATTTGTATCTAAATTG…	ATGCCTACTAGATTAACTAAGACCAGAAAACACAGAGGAAATGTTTCTGCCGGTAAGGGTAGAGTTGGTAAACACAGAAAGCATCCCGGTGGTAGAGGTAAAGCTGGTGGTCAACACCACCACAGAACAAATTTAGATAAATACCACCCAGGTTACTTTGGTAAAGTTGGTATGAGATACTACCACAAGCAACAAGGTCACTTCTGGAGGCCAGAAATCAATTTGGACAAATTGTGGACTCTCGTTGACAGCGATAAGAAGGACGAATACTTGCAATCATCCAGTGCTTCCGCCGCTCCAGTTATCGACACTTTGGCTGCTGGCTACGGTAAGGTCTTGGGTAAAGGTAGATTGCCAGAAGTTCCAGTTATCGTCAAGGCTAGATTTGTATCTAAATTG…	OK	450	YES	CAA	Glutamine	Glutamine (CAA)
yHMPu5000038089_candida_pseudoaaseri_170912_g002627.m1	ATGCCTACTAGATTAACTAAAACTAGAAAACATAGAGGACATGTCTCTGCCGGTCACGGTAGAATTGGTAAACACAGAAAGCATCCCGGTGGTAGAGGTATGGCTGGTGGTCAACATCACCACAGAACTAACTTAGATAAATACCATCCAGGTTACTTCGGTAAAGTTGGTATGAGATACTTCCACAAACAACAAAACCACTTCTGGAAACCAGAAATCAACTTAGACAAATTATGGACTTTAGTTGAAGAAGACAAAAAAGATGAATACTTAAAATCTGCTTCAAAATCTGCTGCTCCAGTTATTGATACTTTAGCTCACGGTTACGGTAAAGTTTTAGGTAAAGGTAGATTACCAGAAGTTCCAGTCATTGTCAAAGCTAGATTCGTCAGTAAATTA…	ATGCCTACTAGATTAACTAAAACTAGAAAACATAGAGGACATGTCTCTGCCGGTCACGGTAGAATTGGTAAACACAGAAAGCATCCCGGTGGTAGAGGTATGGCTGGTGGTCAACATCACCACAGAACTAACTTAGATAAATACCATCCAGGTTACTTCGGTAAAGTTGGTATGAGATACTTCCACAAACAACAAAACCACTTCTGGAAACCAGAAATCAACTTAGACAAATTATGGACTTTAGTTGAAGAAGACAAAAAAGATGAATACTTAAAATCTGCTTCAAAATCTGCTGCTCCAGTTATTGATACTTTAGCTCACGGTTACGGTAAAGTTTTAGGTAAAGGTAGATTACCAGAAGTTCCAGTCATTGTCAAAGCTAGATTCGTCAGTAAATTA…	OK	450	YES	CAA	Glutamine	Glutamine (CAA)
yHMPu5000041858_candida_endomychidarum_170713_g005389.m1	ATGCCTACTAGATTAACTAAAACTAGAAAACATAGAGGACACGTTTCAGCCGGTAATGGTAGAATTGGTAAACATAGAAAACATCCCGGTGGTAGAGGTATGGCTGGTGGTCAACATCATCACAGAACCAATTTAGATAAATACCATCCAGGTTATTTCGGTAAAGTTGGTATGAGATACTTCCACAAACAAAGAAACCACTTCTGGAGACCAGAAATCAACTTAGACAAATTATGGACTTTAGTTGAATCTGACAAAAAAGATGAATACTTAAAAAACTCATCATCATCATCTGCTCCAGTTATTGATACTTTAGCTCATGGTTACGGTAAAGTTTTAGGTAAAGGTAGATTACCTCAAGTTCCAGTCATTGTCAAAGCTAGATTTGTTTCTAAATTA…	ATGCCTACTAGATTAACTAAAACTAGAAAACATAGAGGACACGTTTCAGCCGGTAATGGTAGAATTGGTAAACATAGAAAACATCCCGGTGGTAGAGGTATGGCTGGTGGTCAACATCATCACAGAACCAATTTAGATAAATACCATCCAGGTTATTTCGGTAAAGTTGGTATGAGATACTTCCACAAACAAAGAAACCACTTCTGGAGACCAGAAATCAACTTAGACAAATTATGGACTTTAGTTGAATCTGACAAAAAAGATGAATACTTAAAAAACTCATCATCATCATCTGCTCCAGTTATTGATACTTTAGCTCATGGTTACGGTAAAGTTTTAGGTAAAGGTAGATTACCTCAAGTTCCAGTCATTGTCAAAGCTAGATTTGTTTCTAAATTA…	OK	450	YES	CAA	Glutamine	Glutamine (CAA)
yHMPu5000035246_candida_insectorum_160928_g005460.m1	ATGCCTACTAGATTAACTAAAACTAGAAAACACAGAGGTCACGTTTCAGCCGGTAGAGGTAGAATTGGTAAGCACAGAAAGCACCCCGGTGGTAGAGGTATGGCTGGTGGTCAACACCACCACAGAACCAACTTGGACAAATACCATCCAGGTTACTTCGGTAAAGTTGGTATGAGATACTTCCACAAACAACAAAACCACTTCTGGAGACCAGAAATCAACTTAGACAAATTATGGACTTTAGTTGATGAAGAAAAGAAAGACGAATACTTAAAATCATCTTCCAAATCCGCTGCTCCAGTTATTGACACTTTAGCTCACGGTTACGGTAAAGTTTTAGGTAAAGGTAGATTACCAGAAGTTCCAGTCATTGTTAAAGCTAGATTTGTTTCCAAATTA…	ATGCCTACTAGATTAACTAAAACTAGAAAACACAGAGGTCACGTTTCAGCCGGTAGAGGTAGAATTGGTAAGCACAGAAAGCACCCCGGTGGTAGAGGTATGGCTGGTGGTCAACACCACCACAGAACCAACTTGGACAAATACCATCCAGGTTACTTCGGTAAAGTTGGTATGAGATACTTCCACAAACAACAAAACCACTTCTGGAGACCAGAAATCAACTTAGACAAATTATGGACTTTAGTTGATGAAGAAAAGAAAGACGAATACTTAAAATCATCTTCCAAATCCGCTGCTCCAGTTATTGACACTTTAGCTCACGGTTACGGTAAAGTTTTAGGTAAAGGTAGATTACCAGAAGTTCCAGTCATTGTTAAAGCTAGATTTGTTTCCAAATTA…	OK	450	YES	CAA	Glutamine	Glutamine (CAA)
yHMPu5000037917_candida_blattariae_170210_g005711.m1	ATGCCTACTAGATTAACTAAAACTAGAAAACACAGAGGACACGTTTCAGCCGGTTACGGTAGAATTGGTAAACATAGAAAGAGCTCTGGTGGTAGAGGTATGGCCGGTGGTCAACATCATCACAGAACTAACTTAGATAAATACCATCCAGGTTATTTTGGTAAAGTTGGTATGAGATATTTCCACAAACAACAAGCTCATTTCTGGAAACCAGAAATTAATTTAGATAAATTATGGACTTTAGTTGAATCTGATAAAAAAGATGAATACTTAAAAAACTCATCATCATCATCTGCTCCAGTTATTGATACTTTAGCTCATGGTTACGGTAAAGTTTTAGGTAAAGGTAGATTACCTCAAGTTCCAATCATTGTTAAAGCTAGATTTGTTTCAAAATTA…	ATGCCTACTAGATTAACTAAAACTAGAAAACACAGAGGACACGTTTCAGCCGGTTACGGTAGAATTGGTAAACATAGAAAGAGCTCTGGTGGTAGAGGTATGGCCGGTGGTCAACATCATCACAGAACTAACTTAGATAAATACCATCCAGGTTATTTTGGTAAAGTTGGTATGAGATATTTCCACAAACAACAAGCTCATTTCTGGAAACCAGAAATTAATTTAGATAAATTATGGACTTTAGTTGAATCTGATAAAAAAGATGAATACTTAAAAAACTCATCATCATCATCTGCTCCAGTTATTGATACTTTAGCTCATGGTTACGGTAAAGTTTTAGGTAAAGGTAGATTACCTCAAGTTCCAATCATTGTTAAAGCTAGATTTGTTTCAAAATTA…	OK	450	YES	CAA	Glutamine	Glutamine (CAA)
yHMPu5000041859_candida_friederichii_160928_g000238.m1	ATGCCTACTAGATTAACTAAAACTAGAAAACACAGAGGACACGTTTCAGCCGGTTACGGTAGAATTGGTAAACATAGAAAATCTTCCGGTGGTAGAGGTATGGCCGGTGGTCAACATCATCACAGAACCAATTTAGATAAATACCATCCAGGTTATTTCGGTAAAGTTGGTATGAGATACTTCCACAAACAACAAAACCACTTCTGGAAACCAGAAATCAACTTAGACAAATTATGGACTTTAGTTGAAAGTGACAAAAAAGATGAATACTTAAAAAACTCATCATCATCATCTGCTCCAGTCATTGATACTTTAGCTCATGGTTACGGTAAAGTTTTAGGTAAAGGTAGATTACCTCAAGTTCCAGTTATTGTTAAAGCTAGATTTGTTTCAAAATTA…	ATGCCTACTAGATTAACTAAAACTAGAAAACACAGAGGACACGTTTCAGCCGGTTACGGTAGAATTGGTAAACATAGAAAATCTTCCGGTGGTAGAGGTATGGCCGGTGGTCAACATCATCACAGAACCAATTTAGATAAATACCATCCAGGTTATTTCGGTAAAGTTGGTATGAGATACTTCCACAAACAACAAAACCACTTCTGGAAACCAGAAATCAACTTAGACAAATTATGGACTTTAGTTGAAAGTGACAAAAAAGATGAATACTTAAAAAACTCATCATCATCATCTGCTCCAGTCATTGATACTTTAGCTCATGGTTACGGTAAAGTTTTAGGTAAAGGTAGATTACCTCAAGTTCCAGTTATTGTTAAAGCTAGATTTGTTTCAAAATTA…	OK	450	YES	CAA	Glutamine	Glutamine (CAA)
yHMPu5000037901_candida_membranifaciens_180604_g004795.m1	ATGCCTACTAGATTAACTAAAACTAGAAAACACAGAGGACACGTTTCAGCCGGTTACGGTAGAATTGGTAAACATAGAAAATCTTCCGGTGGTAGAGGTATGGCCGGTGGTCAACATCATCACAGAACCAACTTAGATAAATACCATCCAGGTTATTTCGGTAAAGTTGGTATGAGATACTTCCACAAACAACAAAACCATTTCTGGAGACCAGAAATTAACTTGGACAAATTATGGACTTTAGTTGACAGTGACAAAAAAGATGAATATTTAAAAAACTCATCATCATCATCTGCTCCAGTTATTGATACTTTAGCTCATGGTTACGGTAAAGTTTTAGGTAAAGGTAGATTACCTCAAGTCCCAGTTATTGTTAAAGCTAGATTTGTTTCCAAATTA…	ATGCCTACTAGATTAACTAAAACTAGAAAACACAGAGGACACGTTTCAGCCGGTTACGGTAGAATTGGTAAACATAGAAAATCTTCCGGTGGTAGAGGTATGGCCGGTGGTCAACATCATCACAGAACCAACTTAGATAAATACCATCCAGGTTATTTCGGTAAAGTTGGTATGAGATACTTCCACAAACAACAAAACCATTTCTGGAGACCAGAAATTAACTTGGACAAATTATGGACTTTAGTTGACAGTGACAAAAAAGATGAATATTTAAAAAACTCATCATCATCATCTGCTCCAGTTATTGATACTTTAGCTCATGGTTACGGTAAAGTTTTAGGTAAAGGTAGATTACCTCAAGTCCCAGTTATTGTTAAAGCTAGATTTGTTTCCAAATTA…	OK	450	YES	CAA	Glutamine	Glutamine (CAA)
yHMPu5000026071_candida_songkhlaensis_170912_g005642.m1	ATGCCTACTAGATTAACTAAAACTAGAAAACACAGAGGACACGTTTCAGCCGGTTACGGTAGAATTGGTAAACATAGAAAACATTCTGGTGGTAGAGGTATGGCCGGTGGTCAACATCACCACAGAACCAACTTGGATAAATACCATCCAGGTTACTTCGGTAAAGTTGGTATGAGATACTTCCACAAACAACAAAACCACTTCTGGAGACCAGAAATCAACTTAGACAAATTATGGACTTTAGTTGATTCTGATAAAAAAGATGAATACTTAAAAAACGCTTCAGCTTCAGCTGCTCCAGTCATTGATACTTTAGCCCACGGTTACGGTAAAGTTTTAGGTAAAGGTAGATTACCTCAAGTTCCAGTTATTGTCAAAGCTAGATTTGTTTCCAAATTA…	ATGCCTACTAGATTAACTAAAACTAGAAAACACAGAGGACACGTTTCAGCCGGTTACGGTAGAATTGGTAAACATAGAAAACATTCTGGTGGTAGAGGTATGGCCGGTGGTCAACATCACCACAGAACCAACTTGGATAAATACCATCCAGGTTACTTCGGTAAAGTTGGTATGAGATACTTCCACAAACAACAAAACCACTTCTGGAGACCAGAAATCAACTTAGACAAATTATGGACTTTAGTTGATTCTGATAAAAAAGATGAATACTTAAAAAACGCTTCAGCTTCAGCTGCTCCAGTCATTGATACTTTAGCCCACGGTTACGGTAAAGTTTTAGGTAAAGGTAGATTACCTCAAGTTCCAGTTATTGTCAAAGCTAGATTTGTTTCCAAATTA…	OK	450	YES	CAA	Glutamine	Glutamine (CAA)
yHMPu5000037895_candida_jaroonii_180604_g006391.m1	ATGCCTACTAGATTAACTAAAACTAGAAAACACAGAGGACACGTTTCAGCCGGTTACGGTAGAATTGGTAAACATAGAAAACATTCTGGTGGTAGAGGTATGGCCGGTGGTCAACATCACCACAGAACCAACTTAGATAAATACCATCCAGGTTATTTCGGTAAAGTTGGTATGAGATACTTCCACAAACAACAAAACCACTTCTGGAGACCAGAAATCAACTTAGACAAATTATGGACTTTAGTTGATTCTGATAAAAAAGATGAATACTTAAAAAACGCTTCAGCTTCAGCTGCTCCAGTTATCGATACTTTAGCTCACGGTTACGGTAAAGTTTTAGGTAAAGGTAGATTACCTCAAGTTCCAGTTATTGTCAAAGCTAGATTTGTTTCCAAATTA…	ATGCCTACTAGATTAACTAAAACTAGAAAACACAGAGGACACGTTTCAGCCGGTTACGGTAGAATTGGTAAACATAGAAAACATTCTGGTGGTAGAGGTATGGCCGGTGGTCAACATCACCACAGAACCAACTTAGATAAATACCATCCAGGTTATTTCGGTAAAGTTGGTATGAGATACTTCCACAAACAACAAAACCACTTCTGGAGACCAGAAATCAACTTAGACAAATTATGGACTTTAGTTGATTCTGATAAAAAAGATGAATACTTAAAAAACGCTTCAGCTTCAGCTGCTCCAGTTATCGATACTTTAGCTCACGGTTACGGTAAAGTTTTAGGTAAAGGTAGATTACCTCAAGTTCCAGTTATTGTCAAAGCTAGATTTGTTTCCAAATTA…	OK	450	YES	CAA	Glutamine	Glutamine (CAA)
yHMPu5000038393_candida_diospyri_180604_g001932.m1	ATGCCTACTAGATTAACTAAAACTAGAAAACACAGAGGACACGTTTCAGCCGGTTACGGTAGAATTGGTAAACATAGAAAACATTCCGGTGGTAGAGGTATGGCCGGTGGTCAACATCACCACAGAACTAACTTGGATAAATACCATCCAGGTTACTTCGGTAAAGTCGGTATGAGATACTTCCACAAACAACAAAACCACTTCTGGAGACCAGAAATCAACTTGGACAAATTATGGACTTTGGTCGATTCCGAGAAAAAAGATGAATACTTAAAAAATGCTTCAGCTTCATCCGCTCCAGTCATCGACACTTTAGCTCATGGTTACGGTAAAGTTTTAGGTAAAGGTAGATTACCACAAGTTCCAGTTATTGTTAAAGCTAGATTTGTTTCCAAATTA…	ATGCCTACTAGATTAACTAAAACTAGAAAACACAGAGGACACGTTTCAGCCGGTTACGGTAGAATTGGTAAACATAGAAAACATTCCGGTGGTAGAGGTATGGCCGGTGGTCAACATCACCACAGAACTAACTTGGATAAATACCATCCAGGTTACTTCGGTAAAGTCGGTATGAGATACTTCCACAAACAACAAAACCACTTCTGGAGACCAGAAATCAACTTGGACAAATTATGGACTTTGGTCGATTCCGAGAAAAAAGATGAATACTTAAAAAATGCTTCAGCTTCATCCGCTCCAGTCATCGACACTTTAGCTCATGGTTACGGTAAAGTTTTAGGTAAAGGTAGATTACCACAAGTTCCAGTTATTGTTAAAGCTAGATTTGTTTCCAAATTA…	OK	450	YES	CAA	Glutamine	Glutamine (CAA)
yHMPu5000038076_Candida_tumulicola_SPADES_g004204.m1	ATGCCTACTAGATTAACTAAAACTAGAAAACACAGAGGACACGTTTCAGCCGGTTACGGTAGAATTGGGAAACATAGAAAGAGTTCTGGTGGTAGAGGTATGGCCGGTGGTCAACATCATCACAGAACCAACTTGGATAAATACCATCCAGGTTACTTCGGTAAAGTTGGTATGAGATACTTCCACAAACAACAAAATCACTTCTGGAGACCAGAAATCAACTTGGACAAATTATGGACTTTAGTGGATTCCGAGAAAAAAGATGAATACTTGAAAAACGCTTCTGCTTCATCTGCTCCAGTCATTGATACTTTAGCTCATGGTTACGGTAAAGTTTTGGGTAAAGGTAGATTACCTCAAGTCCCAGTCATTGTCAAAGCAAGATTTGTCTCTAAATTG…	ATGCCTACTAGATTAACTAAAACTAGAAAACACAGAGGACACGTTTCAGCCGGTTACGGTAGAATTGGGAAACATAGAAAGAGTTCTGGTGGTAGAGGTATGGCCGGTGGTCAACATCATCACAGAACCAACTTGGATAAATACCATCCAGGTTACTTCGGTAAAGTTGGTATGAGATACTTCCACAAACAACAAAATCACTTCTGGAGACCAGAAATCAACTTGGACAAATTATGGACTTTAGTGGATTCCGAGAAAAAAGATGAATACTTGAAAAACGCTTCTGCTTCATCTGCTCCAGTCATTGATACTTTAGCTCATGGTTACGGTAAAGTTTTGGGTAAAGGTAGATTACCTCAAGTCCCAGTCATTGTCAAAGCAAGATTTGTCTCTAAATTG…	OK	450	YES	CAA	Glutamine	Glutamine (CAA)
yHMPu5000038029_Yamadazyma_siamensis_SPADES_g005816.m1	ATGCCTACTAGATTAACTAAAACCAGAAAGCACAGAGGTCACGTTTCAGCCGGTAACGGTAGAATTGGTAAGCACAGAAAGCATCCCGGTGGTAGAGGTATGGCTGGTGGTCAACACCACCACAGAACCAACTTGGATAAATACCATCCAGGTTACTTCGGTAAAGTTGGTATGAGATACTTCCACAAACAACAAAACCACTTCTGGAGACCAGAAATCAACTTGGACAAATTATGGACTTTGGTTGACGAAGAAAAGAAGGACGAATACCTCAAGTCTGCTTCCAAGTCTGCTGCTCCAGTCATCGACACCTTGGCTCACGGATACGGAAAAGTCTTGGGTAAAGGTAGATTACCAGAAGTTCCAGTCATTGTCAAGGCCAGATTTGTTTCCAAATTG…	ATGCCTACTAGATTAACTAAAACCAGAAAGCACAGAGGTCACGTTTCAGCCGGTAACGGTAGAATTGGTAAGCACAGAAAGCATCCCGGTGGTAGAGGTATGGCTGGTGGTCAACACCACCACAGAACCAACTTGGATAAATACCATCCAGGTTACTTCGGTAAAGTTGGTATGAGATACTTCCACAAACAACAAAACCACTTCTGGAGACCAGAAATCAACTTGGACAAATTATGGACTTTGGTTGACGAAGAAAAGAAGGACGAATACCTCAAGTCTGCTTCCAAGTCTGCTGCTCCAGTCATCGACACCTTGGCTCACGGATACGGAAAAGTCTTGGGTAAAGGTAGATTACCAGAAGTTCCAGTCATTGTCAAGGCCAGATTTGTTTCCAAATTG…	OK	450	YES	CAA	Glutamine	Glutamine (CAA)
yHMPu5000037896_candida_kanchanaburiensis_180604_g000861.m1	ATGCCTACTAGATTAACTAAAACCAGAAAGCACAGAGGTCACGTTTCAGCCGGTAACGGTAGAATTGGTAAACACAGAAAACATCCAGGTGGTAGAGGTATGGCTGGTGGTCAACACCATCACAGAACCAACTTGGATAAATACCATCCAGGTTACTTCGGTAAAGTTGGTATGAGATACTTCCACAAACAAAGAAACCATTTCTGGAAACCAGAAATCAACTTAGATAAATTATGGACTTTAGTTGATGAAGAAAAGAAAGATGAATACATTAAATCTGCTTCAAAATCTGCTGCTCCAGTTATCGATACTTTAGCTCACGGTTACGGTAAAGTTTTAGGTAAAGGTAGATTACCAGAAGTTCCAGTCATTGTCAAAGCTAGATTTGTCAGTAAATTA…	ATGCCTACTAGATTAACTAAAACCAGAAAGCACAGAGGTCACGTTTCAGCCGGTAACGGTAGAATTGGTAAACACAGAAAACATCCAGGTGGTAGAGGTATGGCTGGTGGTCAACACCATCACAGAACCAACTTGGATAAATACCATCCAGGTTACTTCGGTAAAGTTGGTATGAGATACTTCCACAAACAAAGAAACCATTTCTGGAAACCAGAAATCAACTTAGATAAATTATGGACTTTAGTTGATGAAGAAAAGAAAGATGAATACATTAAATCTGCTTCAAAATCTGCTGCTCCAGTTATCGATACTTTAGCTCACGGTTACGGTAAAGTTTTAGGTAAAGGTAGATTACCAGAAGTTCCAGTCATTGTCAAAGCTAGATTTGTCAGTAAATTA…	OK	450	YES	CAA	Glutamine	Glutamine (CAA)
yHMPu5000035002_candida_buenavistaensis_160519.haplomerger2_g005723.m1	ATGCCTACTAGATTAACTAAAACCAGAAAACATAGAGGTAACGTTTCTGCCGGTAAGGGTAGAATTGGTAAACACAGAAAGCACCCGGGTGGTAGAGGTAAAGCTGGTGGTCAACATCATCACAGAACCAATTTGGATAAATACCATCCAGGTTACTTCGGTAAAGTTGGTATGAGATACTTCCACAAACAACAAAACCATTTCTGGAGACCAGAAATCAACTTGGACAAATTATGGACTTTAGTTGAATCTGATAAAAAAGAAGAATACTTGACCAAATCATCTGCTTCTGCTGCTCCAGTTATTGACACTTTAGCTCATGGTTACGGTAAAGTTTTGGGTAAAGGTAGATTACCAGAAGTTCCAGTCATTGTCAAAGCTAGATTTGTTTCCAAATTA…	ATGCCTACTAGATTAACTAAAACCAGAAAACATAGAGGTAACGTTTCTGCCGGTAAGGGTAGAATTGGTAAACACAGAAAGCACCCGGGTGGTAGAGGTAAAGCTGGTGGTCAACATCATCACAGAACCAATTTGGATAAATACCATCCAGGTTACTTCGGTAAAGTTGGTATGAGATACTTCCACAAACAACAAAACCATTTCTGGAGACCAGAAATCAACTTGGACAAATTATGGACTTTAGTTGAATCTGATAAAAAAGAAGAATACTTGACCAAATCATCTGCTTCTGCTGCTCCAGTTATTGACACTTTAGCTCATGGTTACGGTAAAGTTTTGGGTAAAGGTAGATTACCAGAAGTTCCAGTCATTGTCAAAGCTAGATTTGTTTCCAAATTA…	OK	450	YES	CAA	Glutamine	Glutamine (CAA)
yHMPu5000038362_candida_sakaeoensis_170713_g001879.m1	ATGCCTACTAGATTAACTAAAACCAGAAAACATAGAGGTAACGTTTCTGCCGGTAAAGGTAGAGTTGGTAAACACAGAAAACATCCAGGTGGTAGAGGTAAAGCTGGTGGTCAACATCATCACAGAACTAACTTGGATAAATACCATCCAGGTTACTTCGGTAAAGTCGGTATGAGATACTTCAGAAAACAACAATTACACTTCTGGAGACCAGAAATCAACTTGGACAAATTGTGGACTTTAGTCGAAAGTGATAAAAAAGATGAATACTTGAAATCAGCTTCTAAATCAGCTGCTCCAGTCATTGACACTTTAGCTCACGGTTACGGTAAAGTTTTAGGTAAAGGTAGATTACCAGAAGTTCCAGTTATTGTTAAAGCCAGATTTGTTTCTAAATTG…	ATGCCTACTAGATTAACTAAAACCAGAAAACATAGAGGTAACGTTTCTGCCGGTAAAGGTAGAGTTGGTAAACACAGAAAACATCCAGGTGGTAGAGGTAAAGCTGGTGGTCAACATCATCACAGAACTAACTTGGATAAATACCATCCAGGTTACTTCGGTAAAGTCGGTATGAGATACTTCAGAAAACAACAATTACACTTCTGGAGACCAGAAATCAACTTGGACAAATTGTGGACTTTAGTCGAAAGTGATAAAAAAGATGAATACTTGAAATCAGCTTCTAAATCAGCTGCTCCAGTCATTGACACTTTAGCTCACGGTTACGGTAAAGTTTTAGGTAAAGGTAGATTACCAGAAGTTCCAGTTATTGTTAAAGCCAGATTTGTTTCTAAATTG…	OK	450	YES	CAA	Glutamine	Glutamine (CAA)
yHMPu5000035713_candida_chauliodes_160613_g000098.m1	ATGCCTACTAGATTAACTAAAACCAGAAAACATAGAGGTAACGTTTCTGCCGGTAAAGGTAGAGTCGGTAAACACAGAAAACATCCAGGTGGTAGAGGTAAAGCTGGTGGTCAACATCATCACAGAACCAATTTGGATAAATACCATCCAGGTTACTTTGGTAAAGTTGGTATGAGATACTTCAGAAAACAACAATTACACTTTTGGAGACCAGAAATCAACTTGGACAAATTATGGACCTTAGTCGAAAGTGACAAAAAAGATGAATACTTAAAATCATCATCAAAATCAGCTGCTCCAGTCATTGATACCTTAGCTCACGGTTACGGTAAAGTATTGGGTAAAGGTAGATTACCAGAAGTTCCAGTCATTGTCAAAGCTAGATTTGTTTCTAAATTA…	ATGCCTACTAGATTAACTAAAACCAGAAAACATAGAGGTAACGTTTCTGCCGGTAAAGGTAGAGTCGGTAAACACAGAAAACATCCAGGTGGTAGAGGTAAAGCTGGTGGTCAACATCATCACAGAACCAATTTGGATAAATACCATCCAGGTTACTTTGGTAAAGTTGGTATGAGATACTTCAGAAAACAACAATTACACTTTTGGAGACCAGAAATCAACTTGGACAAATTATGGACCTTAGTCGAAAGTGACAAAAAAGATGAATACTTAAAATCATCATCAAAATCAGCTGCTCCAGTCATTGATACCTTAGCTCACGGTTACGGTAAAGTATTGGGTAAAGGTAGATTACCAGAAGTTCCAGTCATTGTCAAAGCTAGATTTGTTTCTAAATTA…	OK	450	YES	CAA	Glutamine	Glutamine (CAA)
yHMPu5000037238_candida_coleopterorum_210210_g002380.m1	ATGCCTACTAGATTAACTAAAACCAGAAAACATAGAGGTAACGTTTCTGCCGGTAAAGGTAGAATTGGTAAACATAGAAAACATCCAGGTGGTAGAGGTAAAGCTGGTGGTCAACATCATCACAGAACCAATTTAGATAAATACCATCCAGGTTATTTTGGTAAAGTTGGTATGAGATATTTCAGAAAACAACAAATTCACTTCTGGAGACCAGAAATCAATCTTGATAAATTATGGACTTTAGTTGAAAGTGATAAAAAAGAAGAATATTTAAAATCATCAAACAAAACCGCTGCTCCAGTTATTGACACTTTAGCTCATGGTTACGGTAAAGTTTTAGGTAAAGGTAGATTACCAGAAGTTCCAGTCATTGTTAAAGCCAGATTTGTTTCAAAATTA…	ATGCCTACTAGATTAACTAAAACCAGAAAACATAGAGGTAACGTTTCTGCCGGTAAAGGTAGAATTGGTAAACATAGAAAACATCCAGGTGGTAGAGGTAAAGCTGGTGGTCAACATCATCACAGAACCAATTTAGATAAATACCATCCAGGTTATTTTGGTAAAGTTGGTATGAGATATTTCAGAAAACAACAAATTCACTTCTGGAGACCAGAAATCAATCTTGATAAATTATGGACTTTAGTTGAAAGTGATAAAAAAGAAGAATATTTAAAATCATCAAACAAAACCGCTGCTCCAGTTATTGACACTTTAGCTCATGGTTACGGTAAAGTTTTAGGTAAAGGTAGATTACCAGAAGTTCCAGTCATTGTTAAAGCCAGATTTGTTTCAAAATTA…	OK	450	YES	CAA	Glutamine	Glutamine (CAA)
yHMPu5000038360_candida_verbasci_170713_g001467.m1	ATGCCTACTAGATTAACTAAAACCAGAAAACATAGAGGTAACGTTTCTGCCGGTAAAGGTAGAATTGGTAAACATAGAAAACACCCAGGTGGTAGAGGTAAAGCTGGTGGTCAACATCATCACAGAACAAATTTAGATAAATACCATCCAGGTTATTTTGGTAAAGTTGGTATGAGATATTTCAGAAAACAACAATTACATTTTTGGAGACCAGAAATTAATCTTGATAAATTATGGACTTTGGTTGAAAGTGATAAAAAAGATGAATATTTAAAATCATCAAACAAAACTGCTGCTCCAGTTATTGATACTTTAGCTCATGGTTATGGTAAAGTTTTAGGTAAAGGTAGATTACCAGAAGTTCCAATTATTGTTAAAGCAAGATTTGTTTCAAAATTA…	ATGCCTACTAGATTAACTAAAACCAGAAAACATAGAGGTAACGTTTCTGCCGGTAAAGGTAGAATTGGTAAACATAGAAAACACCCAGGTGGTAGAGGTAAAGCTGGTGGTCAACATCATCACAGAACAAATTTAGATAAATACCATCCAGGTTATTTTGGTAAAGTTGGTATGAGATATTTCAGAAAACAACAATTACATTTTTGGAGACCAGAAATTAATCTTGATAAATTATGGACTTTGGTTGAAAGTGATAAAAAAGATGAATATTTAAAATCATCAAACAAAACTGCTGCTCCAGTTATTGATACTTTAGCTCATGGTTATGGTAAAGTTTTAGGTAAAGGTAGATTACCAGAAGTTCCAATTATTGTTAAAGCAAGATTTGTTTCAAAATTA…	OK	450	YES	CAA	Glutamine	Glutamine (CAA)
yHMPu5000034992_candida_maltosa_190924.haplomerger2_g004762.m1	ATGCCTACTAGATTAACTAAAACCAGAAAACATAGAGGTAACGTTTCTGCCGGTAAAGGTAGAATTGGTAAACACAGAAAGCACCCGGGTGGTAGAGGTAAAGCTGGTGGTCAACACCATCACAGAACCAATTTGGATAAATACCATCCAGGTTACTTCGGTAAAGTTGGTATGAGATACTTCCACAAACAACAAAACCACTTCTGGAGACCAGAAATCAACTTGGACAAATTATGGACTTTAGTTGAATCCGACAAAAAAGACGAATACTTGTCCAAATCCTCCGCTTCTGCTGCCCCAGTCATTGACACTTTGGCTCACGGTTACGGTAAAGTTTTGGGTAAAGGTAGATTACCAGAAGTTCCAGTCATTGTCAAAGCTAGATTTGTTTCTAAATTA…	ATGCCTACTAGATTAACTAAAACCAGAAAACATAGAGGTAACGTTTCTGCCGGTAAAGGTAGAATTGGTAAACACAGAAAGCACCCGGGTGGTAGAGGTAAAGCTGGTGGTCAACACCATCACAGAACCAATTTGGATAAATACCATCCAGGTTACTTCGGTAAAGTTGGTATGAGATACTTCCACAAACAACAAAACCACTTCTGGAGACCAGAAATCAACTTGGACAAATTATGGACTTTAGTTGAATCCGACAAAAAAGACGAATACTTGTCCAAATCCTCCGCTTCTGCTGCCCCAGTCATTGACACTTTGGCTCACGGTTACGGTAAAGTTTTGGGTAAAGGTAGATTACCAGAAGTTCCAGTCATTGTCAAAGCTAGATTTGTTTCTAAATTA…	OK	450	YES	CAA	Glutamine	Glutamine (CAA)
yHMPu5000035003_candida_bohiensis_160519_g003527.m1	ATGCCTACTAGATTAACTAAAACCAGAAAACATAGAGGTAACGTTTCTGCCGGTAAAGGTAGAATTGGTAAACACAGAAAACACCCGGGTGGTAGAGGTAAAGCTGGTGGTCAACATCATCACAGAACCAATTTAGATAAATACCATCCAGGTTATTTTGGTAAAGTTGGTATGAGATATTTCCATAAACAACAAAACCATTTCTGGAGACCAGAAATTAATTTAGATAAATTATGGACTTTAGTTGAATCTGACAAAAAAGATGAATATTTACAATCATCATCAAAATCAGCTGCTCCAGTTATTGATACTTTAGCTCATGGTTACGGTAAAGTTTTAGGTAAAGGTAGATTACCTCAAGTTCCTGTCATTGTTAAAGCTAGATTTGTTTCAAAATTA…	ATGCCTACTAGATTAACTAAAACCAGAAAACATAGAGGTAACGTTTCTGCCGGTAAAGGTAGAATTGGTAAACACAGAAAACACCCGGGTGGTAGAGGTAAAGCTGGTGGTCAACATCATCACAGAACCAATTTAGATAAATACCATCCAGGTTATTTTGGTAAAGTTGGTATGAGATATTTCCATAAACAACAAAACCATTTCTGGAGACCAGAAATTAATTTAGATAAATTATGGACTTTAGTTGAATCTGACAAAAAAGATGAATATTTACAATCATCATCAAAATCAGCTGCTCCAGTTATTGATACTTTAGCTCATGGTTACGGTAAAGTTTTAGGTAAAGGTAGATTACCTCAAGTTCCTGTCATTGTTAAAGCTAGATTTGTTTCAAAATTA…	OK	450	YES	CAA	Glutamine	Glutamine (CAA)
yHMPu5000037251_candida_xiaguanesis_210210_g005265.m1	ATGCCTACTAGATTAACTAAAACCAGAAAACATAGAGGTAACGTTTCCGCCGGTAAAGGTAGAGTTGGTAAACACAGAAAACATCCAGGTGGTAGAGGTAAAGCTGGTGGTCAACATCATCACAGAACCAATTTAGATAAATACCATCCAGGTTACTTTGGTAAAGTTGGTATGAGATATTTCAGAAAACAACAATTACACTTTTGGAGACCAGAAATCAACTTGGACAAATTGTGGACTTTGGTTGAATCTGATAAAAAAGATGAATATTTAAAATCATCTTCTAAATCAGCCGCCCCAGTCATTGATACTTTAGCTCATGGTTACGGTAAAGTTTTGGGTAAAGGTAGATTACCAGAAGTCCCAGTTATTGTCAAAGCCAGATTTGTCTCAAAATTG…	ATGCCTACTAGATTAACTAAAACCAGAAAACATAGAGGTAACGTTTCCGCCGGTAAAGGTAGAGTTGGTAAACACAGAAAACATCCAGGTGGTAGAGGTAAAGCTGGTGGTCAACATCATCACAGAACCAATTTAGATAAATACCATCCAGGTTACTTTGGTAAAGTTGGTATGAGATATTTCAGAAAACAACAATTACACTTTTGGAGACCAGAAATCAACTTGGACAAATTGTGGACTTTGGTTGAATCTGATAAAAAAGATGAATATTTAAAATCATCTTCTAAATCAGCCGCCCCAGTCATTGATACTTTAGCTCATGGTTACGGTAAAGTTTTGGGTAAAGGTAGATTACCAGAAGTCCCAGTTATTGTCAAAGCCAGATTTGTCTCAAAATTG…	OK	450	YES	CAA	Glutamine	Glutamine (CAA)
yHMPu5000035329_candida_saitoana_180604.haplomerger2_g000283.m1	ATGCCTACTAGATTAACTAAAACCAGAAAACATAGAGGTAACGTCTCTGCCGGTAAAGGTAGAGTTGGTAAACATAGAAAAAATCCCGGTGGTAGAGGTATGGCCGGTGGTATGCATCATCACAGAACCAACATGGATAAATACCATCCAGGTTACTTCGGTAAAGTTGGTATGAGATACTTCCACAAACAACAAAACCATTTCTGGAGACCAGAATTGAACTTGGACAAATTATGGTCTTTAGTCGAAGATGAAAAAAGAGATGAATACTTGAAATCCGCTTCTGCCACTGCCGCTCCAGTCATTGACACCTTAGCCCACGGTTACGGTAAAGTCTTAGGTAAAGGTAGATTACCAAACGTTCCAGTCATTGTCAAAGCTAGATTTGTTTCCAAATTA…	ATGCCTACTAGATTAACTAAAACCAGAAAACATAGAGGTAACGTCTCTGCCGGTAAAGGTAGAGTTGGTAAACATAGAAAAAATCCCGGTGGTAGAGGTATGGCCGGTGGTATGCATCATCACAGAACCAACATGGATAAATACCATCCAGGTTACTTCGGTAAAGTTGGTATGAGATACTTCCACAAACAACAAAACCATTTCTGGAGACCAGAATTGAACTTGGACAAATTATGGTCTTTAGTCGAAGATGAAAAAAGAGATGAATACTTGAAATCCGCTTCTGCCACTGCCGCTCCAGTCATTGACACCTTAGCCCACGGTTACGGTAAAGTCTTAGGTAAAGGTAGATTACCAAACGTTCCAGTCATTGTCAAAGCTAGATTTGTTTCCAAATTA…	OK	450	YES	ATG	Methionine	Methionine (ATG)
yHMPu5000034919_nakazawaea_ishiwadae_160519.g003094.m1	ATGCCTACTAGATTAACTAAAACCAGAAAACATAGAGGTAACGTCTCAGCCGGTAACGGTCGTATTGGTAAACACAGAAAGCACCCGGGTGGTAGAGGTAAAGCTGGTGGTCAACATCATCACAGAACCAATTTGGATAAATACCATCCAGGTTACTTTGGTAAAGTTGGTATGAGATACTTCCACAAACAACAAGCTCATTTCTGGAAACCAGTTATCAACTTGGATAAATTATGGACTTTAGTTCCAGCTGAAAACAAGGATGAATTATTGAAATCATCAAACCAATCAGCTGCTGTTGTCATTGACACCTTAGCTAACGGTTACGGTAAAGTTTTAGGTAAAGGTAGATTACCATCAGTTCCAGTTATCGTCAAGGCTAGATTTGTTTCTAAATTA…	ATGCCTACTAGATTAACTAAAACCAGAAAACATAGAGGTAACGTCTCAGCCGGTAACGGTCGTATTGGTAAACACAGAAAGCACCCGGGTGGTAGAGGTAAAGCTGGTGGTCAACATCATCACAGAACCAATTTGGATAAATACCATCCAGGTTACTTTGGTAAAGTTGGTATGAGATACTTCCACAAACAACAAGCTCATTTCTGGAAACCAGTTATCAACTTGGATAAATTATGGACTTTAGTTCCAGCTGAAAACAAGGATGAATTATTGAAATCATCAAACCAATCAGCTGCTGTTGTCATTGACACCTTAGCTAACGGTTACGGTAAAGTTTTAGGTAAAGGTAGATTACCATCAGTTCCAGTTATCGTCAAGGCTAGATTTGTTTCTAAATTA…	OK	450	YES	CAA	Glutamine	Glutamine (CAA)
yHMPu5000034922_nakazawaea_pomicola_160519.g003509.m1	ATGCCTACTAGATTAACTAAAACCAGAAAACATAGAGGTAACGTCTCAGCCGGTAACGGTCGTATCGGTAAACACAGAAAGCATCCAGGTGGTAGAGGTAAAGCTGGTGGTCAACATCATCACAGAACCAACTTGGATAAATACCATCCAGGTTACTTCGGTAAAGTTGGTATGAGATACTTCCACAAACAACAAGCTCATTTCTGGAAACCAGTTATCAACTTGGACAAATTATGGACTTTAGTTGAAAACAAGGACGAAAACTTGAAATCATCAAACCAATCTGCTGCTGTTGTTATTGACACTTTGGCTAACGGTTACGGTAAAGTTTTGGGTAAAGGTAGATTACCATCAGTCCCAGTTATCGTTAAAGCTAGATTTGTTTCTAAGTTAGCTGAA…	ATGCCTACTAGATTAACTAAAACCAGAAAACATAGAGGTAACGTCTCAGCCGGTAACGGTCGTATCGGTAAACACAGAAAGCATCCAGGTGGTAGAGGTAAAGCTGGTGGTCAACATCATCACAGAACCAACTTGGATAAATACCATCCAGGTTACTTCGGTAAAGTTGGTATGAGATACTTCCACAAACAACAAGCTCATTTCTGGAAACCAGTTATCAACTTGGACAAATTATGGACTTTAGTTGAAAACAAGGACGAAAACTTGAAATCATCAAACCAATCTGCTGCTGTTGTTATTGACACTTTGGCTAACGGTTACGGTAAAGTTTTGGGTAAAGGTAGATTACCATCAGTCCCAGTTATCGTTAAAGCTAGATTTGTTTCTAAGTTAGCTGAA…	OK	444	YES	CAA	Glutamine	Glutamine (CAA)
yHMPu5000038032_yamadazyma_kitorensis_170912_g004181.m1	ATGCCTACTAGATTAACTAAAACCAGAAAACATAGAGGACACGTTTCAGCCGGTCATGGTAGAATTGGTAAACACAGAAAGCATCCGGGTGGTAGAGGTATGGCTGGTGGTCAACATCATCACAGAACCAATTTAGATAAATACCATCCAGGTTATTTCGGTAAAGTTGGTATGAGATACTTCCACAAACAACAAAACCATTTCTGGAGACCAGAAATCAACTTGGACAAATTATGGACTTTAGTTGATGCTGAAAAGAAAGATGACTACTTAAAATCTTCATCTGCTTCAGCTGCTCCAGTTATCGATACTTTAGCTCATGGTTACGGTAAAGTTTTAGGTAAAGGTAGATTACCAGAAGTTCCAGTCATTGTTAAAGCCAGATTTGTTTCTAAATTA…	ATGCCTACTAGATTAACTAAAACCAGAAAACATAGAGGACACGTTTCAGCCGGTCATGGTAGAATTGGTAAACACAGAAAGCATCCGGGTGGTAGAGGTATGGCTGGTGGTCAACATCATCACAGAACCAATTTAGATAAATACCATCCAGGTTATTTCGGTAAAGTTGGTATGAGATACTTCCACAAACAACAAAACCATTTCTGGAGACCAGAAATCAACTTGGACAAATTATGGACTTTAGTTGATGCTGAAAAGAAAGATGACTACTTAAAATCTTCATCTGCTTCAGCTGCTCCAGTTATCGATACTTTAGCTCATGGTTACGGTAAAGTTTTAGGTAAAGGTAGATTACCAGAAGTTCCAGTCATTGTTAAAGCCAGATTTGTTTCTAAATTA…	OK	450	YES	CAA	Glutamine	Glutamine (CAA)
yHMPu5000038028_yamadazyma_takamatsuzukensis_170912_g004375.m1	ATGCCTACTAGATTAACTAAAACCAGAAAACATAGAGGACACGTTTCAGCCGGTCAAGGTAGAATCGGTAAGCACAGAAAGCATCCCGGTGGTAGAGGTATGGCTGGTGGTCAACATCACCACAGAACCAACTTGGATAAATACCATCCAGGTTACTTCGGTAAAGTTGGTATGAGATACTTCCACAAACAAAGAAACCACTTCTGGAGACCAGAAATCAACTTAGACAAATTATGGACTTTAGTTGAAGAAGAAAAGAAAGATGAATACTTAAAATCTGCTTCCGCTTCCGCTGCTCCAGTCATTGATACTTTAGCTCACGGTTACGGTAAAGTTTTAGGTAAAGGTAGATTACCAGAAGTTCCAGTTATTGTTAAAGCCAGATTTGTTTCTAAATTA…	ATGCCTACTAGATTAACTAAAACCAGAAAACATAGAGGACACGTTTCAGCCGGTCAAGGTAGAATCGGTAAGCACAGAAAGCATCCCGGTGGTAGAGGTATGGCTGGTGGTCAACATCACCACAGAACCAACTTGGATAAATACCATCCAGGTTACTTCGGTAAAGTTGGTATGAGATACTTCCACAAACAAAGAAACCACTTCTGGAGACCAGAAATCAACTTAGACAAATTATGGACTTTAGTTGAAGAAGAAAAGAAAGATGAATACTTAAAATCTGCTTCCGCTTCCGCTGCTCCAGTCATTGATACTTTAGCTCACGGTTACGGTAAAGTTTTAGGTAAAGGTAGATTACCAGAAGTTCCAGTTATTGTTAAAGCCAGATTTGTTTCTAAATTA…	OK	450	YES	CAA	Glutamine	Glutamine (CAA)
yHMPu5000038108_Candida_khao-thaluensis_SPADES.g002597.m1	ATGCCTACTAGATTAACTAAAACCAGAAAACATAGAGGACACGTTTCAGCCGGTAATGGTAGAATTGGTAAACATAGAAAGCATCCCGGTGGTAGAGGTATGGCTGGTGGTCAACATCATCACAGAACCAACTTGGATAAATACCATCCAGGTTACTTCGGTAAAGTTGGTATGAGATACTTCCACAAACAACAAAACCATTTCTGGAGACCAGAAATCAACTTGGACAAATTATGGACTTTAGTTGAATCTGACAAGAAAGATGAATACTTAAAGAACGCTTCCGCTTCTTCAGCTCCAGTTATCGACACTTTAGCTCACGGTTACGGTAAAGTTTTAGGTAAAGGTAGATTACCTCAAGTTCCAGTTATTGTCAAAGCTAGATTTGTTTCCAAATTA…	ATGCCTACTAGATTAACTAAAACCAGAAAACATAGAGGACACGTTTCAGCCGGTAATGGTAGAATTGGTAAACATAGAAAGCATCCCGGTGGTAGAGGTATGGCTGGTGGTCAACATCATCACAGAACCAACTTGGATAAATACCATCCAGGTTACTTCGGTAAAGTTGGTATGAGATACTTCCACAAACAACAAAACCATTTCTGGAGACCAGAAATCAACTTGGACAAATTATGGACTTTAGTTGAATCTGACAAGAAAGATGAATACTTAAAGAACGCTTCCGCTTCTTCAGCTCCAGTTATCGACACTTTAGCTCACGGTTACGGTAAAGTTTTAGGTAAAGGTAGATTACCTCAAGTTCCAGTTATTGTCAAAGCTAGATTTGTTTCCAAATTA…	OK	450	YES	CAA	Glutamine	Glutamine (CAA)
yHMPu5000037902_candida_michaelii_180604_g005505.m1	ATGCCTACTAGATTAACTAAAACCAGAAAACATAGAGGACACGTTTCAGCCGGTAATGGTAGAATTGGTAAACATAGAAAACATCCCGGTGGTAGAGGTATGGCTGGTGGTCAACATCATCACAGAACTAACTTAGATAAATACCATCCAGGTTATTTCGGTAAAGTTGGTATGAGATACTTCCACAAACAAAGAAACCATTTCTGGAGACCAGAAATCAACTTAGACAAATTATGGACTTTAGTTGAATCTGATAAAAAAGATGAATACTTAAAAAACTCATCAGCTTCATCAGCTCCAGTTATTGATACTTTAGCTCATGGTTATGGTAAAGTTTTAGGTAAAGGTAGATTACCTCAAGTTCCAGTTATTGTCAAAGCTAGATTTGTTTCAAAATTA…	ATGCCTACTAGATTAACTAAAACCAGAAAACATAGAGGACACGTTTCAGCCGGTAATGGTAGAATTGGTAAACATAGAAAACATCCCGGTGGTAGAGGTATGGCTGGTGGTCAACATCATCACAGAACTAACTTAGATAAATACCATCCAGGTTATTTCGGTAAAGTTGGTATGAGATACTTCCACAAACAAAGAAACCATTTCTGGAGACCAGAAATCAACTTAGACAAATTATGGACTTTAGTTGAATCTGATAAAAAAGATGAATACTTAAAAAACTCATCAGCTTCATCAGCTCCAGTTATTGATACTTTAGCTCATGGTTATGGTAAAGTTTTAGGTAAAGGTAGATTACCTCAAGTTCCAGTTATTGTCAAAGCTAGATTTGTTTCAAAATTA…	OK	450	YES	CAA	Glutamine	Glutamine (CAA)
yHMPu5000035248_candida_cerambycidarum_160928_g001605.m1	ATGCCTACTAGATTAACTAAAACCAGAAAACATAGAGGACACGTTTCAGCCGGTAATGGTAGAATTGGTAAACATAGAAAACATCCCGGTGGTAGAGGTATGGCTGGTGGTCAACATCACCACAGAACCAACTTAGATAAATACCATCCAGGTTATTTCGGTAAAGTTGGTATGAGATACTTCCACAAACAAAGAAACCATTTCTGGAGACCAGAAATCAACTTGGACAAATTATGGACTTTAGTTGAATCTGATAAAAAAGATGAATACTTAAAAAACTCATCAGCTTCATCAGCTCCAGTTATTGATACTTTAGCTCATGGTTATGGTAAAGTTTTAGGTAAAGGTAGATTACCTCAAGTTCCAGTTATTGTTAAAGCTAGATTCGTCTCAAAATTA…	ATGCCTACTAGATTAACTAAAACCAGAAAACATAGAGGACACGTTTCAGCCGGTAATGGTAGAATTGGTAAACATAGAAAACATCCCGGTGGTAGAGGTATGGCTGGTGGTCAACATCACCACAGAACCAACTTAGATAAATACCATCCAGGTTATTTCGGTAAAGTTGGTATGAGATACTTCCACAAACAAAGAAACCATTTCTGGAGACCAGAAATCAACTTGGACAAATTATGGACTTTAGTTGAATCTGATAAAAAAGATGAATACTTAAAAAACTCATCAGCTTCATCAGCTCCAGTTATTGATACTTTAGCTCATGGTTATGGTAAAGTTTTAGGTAAAGGTAGATTACCTCAAGTTCCAGTTATTGTTAAAGCTAGATTCGTCTCAAAATTA…	OK	450	YES	CAA	Glutamine	Glutamine (CAA)
yHMPu5000041863_candida_gorgasii_160928_g003094.m1	ATGCCTACTAGATTAACTAAAACCAGAAAACATAGAGGACACGTTTCAGCCGGTAATGGTAGAATTGGTAAACACAGAAAGCATCCCGGTGGTAGAGGTATGGCTGGTGGTCAACATCATCACAGAACCAATTTAGATAAATACCATCCAGGTTATTTCGGTAAAGTTGGTATGAGATACTTCCACAAACAAAGAAACCACTTCTGGAGACCAGAAATTAACTTAGACAAATTATGGACTTTAGTTGAATCTGATAAAAAAGATGAATACTTAAAGAACTCATCAGCTTCATCAGCTCCAGTTATTGATACTTTAGCTCATGGTTACGGTAAAGTTTTAGGTAAAGGTAGATTACCTCAAGTTCCAGTTATTGTCAAAGCCAGATTTGTTTCCAAATTA…	ATGCCTACTAGATTAACTAAAACCAGAAAACATAGAGGACACGTTTCAGCCGGTAATGGTAGAATTGGTAAACACAGAAAGCATCCCGGTGGTAGAGGTATGGCTGGTGGTCAACATCATCACAGAACCAATTTAGATAAATACCATCCAGGTTATTTCGGTAAAGTTGGTATGAGATACTTCCACAAACAAAGAAACCACTTCTGGAGACCAGAAATTAACTTAGACAAATTATGGACTTTAGTTGAATCTGATAAAAAAGATGAATACTTAAAGAACTCATCAGCTTCATCAGCTCCAGTTATTGATACTTTAGCTCATGGTTACGGTAAAGTTTTAGGTAAAGGTAGATTACCTCAAGTTCCAGTTATTGTCAAAGCCAGATTTGTTTCCAAATTA…	OK	450	YES	CAA	Glutamine	Glutamine (CAA)
yHMPu5000040921_candida_lessepsii_201018_g004619.m1	ATGCCTACTAGATTAACTAAAACCAGAAAACATAGAGGACACGTTTCAGCCGGTAATGGTAGAATCGGTAAACATAGAAAGCATCCCGGTGGTAGAGGTATGGCTGGTGGTTTCCACCACCACAGAACCAACTTAGATAAATACCATCCAGGTTATTTCGGTAAAGTTGGTATGAGATACTTCCACAAACAAAGAAACCATTTCTGGAGACCAGAAATCAACTTAGACAAATTATGGACCTTAGTTGAATCTGACAAAAAAGATGAATACTTAAAGAACGCTTCATCTTCATCTGCTCCAGTTATTGACACTTTAGCTCATGGTTACGGTAAAGTTTTAGGTAAAGGTAAATTACCTCAAGTTCCAGTTATTGTCAAAGCTAGATTTGTTTCCAAATTA…	ATGCCTACTAGATTAACTAAAACCAGAAAACATAGAGGACACGTTTCAGCCGGTAATGGTAGAATCGGTAAACATAGAAAGCATCCCGGTGGTAGAGGTATGGCTGGTGGTTTCCACCACCACAGAACCAACTTAGATAAATACCATCCAGGTTATTTCGGTAAAGTTGGTATGAGATACTTCCACAAACAAAGAAACCATTTCTGGAGACCAGAAATCAACTTAGACAAATTATGGACCTTAGTTGAATCTGACAAAAAAGATGAATACTTAAAGAACGCTTCATCTTCATCTGCTCCAGTTATTGACACTTTAGCTCATGGTTACGGTAAAGTTTTAGGTAAAGGTAAATTACCTCAAGTTCCAGTTATTGTCAAAGCTAGATTTGTTTCCAAATTA…	OK	450	YES	TTC	Phenylalanine	Phenylalanine (TTC)
yHMPu5000037900_candida_labiduridarum_190924_g006353.m1	ATGCCTACTAGATTAACTAAAACCAGAAAACACAGAGGTCACGTTTCTGCCGGTAAGGGTAGAATTGGTAAACACAGAAAGCACCCGGGTGGTAGAGGTAAAGCTGGTGGTCAACATCATCACAGAACCAACTTGGATAAATACCATCCAGGTTACTTCGGTAAAGTTGGTATGAGATACTTCCACAAACAACAAAACCACTTCTGGAGACCAGAAATCAACTTGGACAAATTATGGACCTTAGTTGAATCCGACAAAAAAGAAGAATACTTGACCAAATCTTCTGCTTCCGCTGCCCCAGTGATTGACACTTTGGCTCACGGTTACGGTAAAGTTTTGGGTAAAGGTAGATTACCAGAAGTTCCAGTCATTGTCAAAGCTAGATTTGTTTCTAAATTA…	ATGCCTACTAGATTAACTAAAACCAGAAAACACAGAGGTCACGTTTCTGCCGGTAAGGGTAGAATTGGTAAACACAGAAAGCACCCGGGTGGTAGAGGTAAAGCTGGTGGTCAACATCATCACAGAACCAACTTGGATAAATACCATCCAGGTTACTTCGGTAAAGTTGGTATGAGATACTTCCACAAACAACAAAACCACTTCTGGAGACCAGAAATCAACTTGGACAAATTATGGACCTTAGTTGAATCCGACAAAAAAGAAGAATACTTGACCAAATCTTCTGCTTCCGCTGCCCCAGTGATTGACACTTTGGCTCACGGTTACGGTAAAGTTTTGGGTAAAGGTAGATTACCAGAAGTTCCAGTCATTGTCAAAGCTAGATTTGTTTCTAAATTA…	OK	450	YES	CAA	Glutamine	Glutamine (CAA)
yHMPu5000038350_candida_sanyaensis_180604.haplomerger2_g005370.m1	ATGCCTACTAGATTAACTAAAACCAGAAAACACAGAGGTCACGTTTCTGCCGGTAAGGGTAGAATTGGTAAACACAGAAAGCACCCGGGTGGTAGAGGTAAAGCTGGTGGTCAACATCACCACAGAACCAACTTGGATAAATACCATCCAGGTTACTTCGGTAAAGTTGGTATGAGATACTTCCACAAACAACAAAACCACTTCTGGAGACCAGAAATCAACTTGGACAAATTGTGGACTTTAGTTGAAGCCGACAAGAAAGAAGAATACTTGACCAAATCCTCTGCTTCCGCTGCCCCAGTCATTGACACTTTGGCTCACGGTTACGGTAAAGTTTTGGGTAAAGGTAGATTACCAGAAGTTCCAGTCATTGTCAAAGCCAGATTTGTTTCTAAATTA…	ATGCCTACTAGATTAACTAAAACCAGAAAACACAGAGGTCACGTTTCTGCCGGTAAGGGTAGAATTGGTAAACACAGAAAGCACCCGGGTGGTAGAGGTAAAGCTGGTGGTCAACATCACCACAGAACCAACTTGGATAAATACCATCCAGGTTACTTCGGTAAAGTTGGTATGAGATACTTCCACAAACAACAAAACCACTTCTGGAGACCAGAAATCAACTTGGACAAATTGTGGACTTTAGTTGAAGCCGACAAGAAAGAAGAATACTTGACCAAATCCTCTGCTTCCGCTGCCCCAGTCATTGACACTTTGGCTCACGGTTACGGTAAAGTTTTGGGTAAAGGTAGATTACCAGAAGTTCCAGTCATTGTCAAAGCCAGATTTGTTTCTAAATTA…	OK	450	YES	CAA	Glutamine	Glutamine (CAA)
yHMPu5000037217_hanseniaspora_mollemarum_210210.g000191.m1	ATGCCTACTAGATTAACTAAAACCAGAAAACACAGAGGTCACGTCTCAGCCGGTAACGGTAGAGTTGGTAAGCACAGAAAGCATCCAGGTGGTAGAGGTATGGCCGGTGGTCAACATCACCACAGAATCAACTTGGATAAGTACCATCCAGGTTACTTCGGTAAGGTTGGTATGAGATACTTCCACAAGCAACAAAACCACTTCTGGAAGCCAGTCTTAAACTTAGACAAGTTGTGGACTTTAATCCCAGAAGACAAGAGAGATGACTACTTAAAGAACTCCTCTGCTTCTTCTGCTCCAGTTATTGACACTTTGGCTGCCGGTTACGGTAAGGTTTTAGGTAAGGGTAAATTACCTCAAGTTCCAGTCATTGTCAAGGCTAGATTTGTCTCCAAGTTA…	ATGCCTACTAGATTAACTAAAACCAGAAAACACAGAGGTCACGTCTCAGCCGGTAACGGTAGAGTTGGTAAGCACAGAAAGCATCCAGGTGGTAGAGGTATGGCCGGTGGTCAACATCACCACAGAATCAACTTGGATAAGTACCATCCAGGTTACTTCGGTAAGGTTGGTATGAGATACTTCCACAAGCAACAAAACCACTTCTGGAAGCCAGTCTTAAACTTAGACAAGTTGTGGACTTTAATCCCAGAAGACAAGAGAGATGACTACTTAAAGAACTCCTCTGCTTCTTCTGCTCCAGTTATTGACACTTTGGCTGCCGGTTACGGTAAGGTTTTAGGTAAGGGTAAATTACCTCAAGTTCCAGTCATTGTCAAGGCTAGATTTGTCTCCAAGTTA…	OK	450	YES	CAA	Glutamine	Glutamine (CAA)
yHDO590_kloeckera_taiwanica_180604.haplomerger2.g002868.m1	ATGCCTACTAGATTAACTAAAACCAGAAAACACAGAGGTCACGTCTCAGCCGGTAACGGTAGAGTTGGTAAACACAGAAAACATCCAGGTGGTAGAGGTATGGCTGGTGGTCAACATCATCACAGAATTAATTTGGATAAATACCATCCAGGTTACTTCGGTAAAGTTGGTATGAGATACTACCACAAACAACAAGCTCAATTCTGGAAACCAGTTTTGAACTTGGACAAATTGTGGACTTTGGTTCCAGAACAAAAAAGAGACGAATACTTGAAAAACGCCTCTGCTACTTCTGCTCCAGTTATTGACACCTTGGCTGCCGGTTACGGTAAAGTTTTGGGTAAAGGTAGAATTCCAAACGTCCCAGTCATCGTCAAAGCTAGATTTGTTTCCAAATTA…	ATGCCTACTAGATTAACTAAAACCAGAAAACACAGAGGTCACGTCTCAGCCGGTAACGGTAGAGTTGGTAAACACAGAAAACATCCAGGTGGTAGAGGTATGGCTGGTGGTCAACATCATCACAGAATTAATTTGGATAAATACCATCCAGGTTACTTCGGTAAAGTTGGTATGAGATACTACCACAAACAACAAGCTCAATTCTGGAAACCAGTTTTGAACTTGGACAAATTGTGGACTTTGGTTCCAGAACAAAAAAGAGACGAATACTTGAAAAACGCCTCTGCTACTTCTGCTCCAGTTATTGACACCTTGGCTGCCGGTTACGGTAAAGTTTTGGGTAAAGGTAGAATTCCAAACGTCCCAGTCATCGTCAAAGCTAGATTTGTTTCCAAATTA…	OK	450	YES	CAA	Glutamine	Glutamine (CAA)
hanseniaspora_gamundiae_g002683.m11	ATGCCTACTAGATTAACTAAAACCAGAAAACACAGAGGTCACGTCTCAGCCGGTAACGGTAGAGTTGGTAAACACAGAAAACATCCAGGTGGTAGAGGTATGGCTGGTGGTCAACATCATCACAGAATTAACTTGGATAAATACCATCCTGGTTACTTTGGTAAAGTTGCTCAATTCTGGAAACCAGTTTTGAACTTGGACAAATTATGGACTTTGGTTCCAGAACAAAAAAGAGATGAATACTTGAAAAACGCCTCTGCTACTTCTGCTCCAGTCATCGACACCTTGGCTGCCGGTTTCGGTAAAGTCTTGGGTAAAGGTAGAATTCCAAACGTCCCAGTCATCGTCAAAGCTAGATTTGTCTCCAAATTAGCTGAAGAAAAAATCAGAGCTGCTGGT…	ATGCCTACTAGATTAACTAAAACCAGAAAACACAGAGGTCACGTCTCAGCCGGTAACGGTAGAGTTGGTAAACACAGAAAACATCCAGGTGGTAGAGGTATGGCTGGTGGTCAACATCATCACAGAATTAACTTGGATAAATACCATCCTGGTTACTTTGGTAAAGTTGCTCAATTCTGGAAACCAGTTTTGAACTTGGACAAATTATGGACTTTGGTTCCAGAACAAAAAAGAGATGAATACTTGAAAAACGCCTCTGCTACTTCTGCTCCAGTCATCGACACCTTGGCTGCCGGTTTCGGTAAAGTCTTGGGTAAAGGTAGAATTCCAAACGTCCCAGTCATCGTCAAAGCTAGATTTGTCTCCAAATTAGCTGAAGAAAAAATCAGAGCTGCTGGT…	OK	423	YES	CAA	Glutamine	Glutamine (CAA)
yHMPu5000034957_Hanseniaspora_osmophila_SPADES.g002934.m1	ATGCCTACTAGATTAACTAAAACCAGAAAACACAGAGGTCACGTCTCAGCCGGTAACGGTAGAGTTGGTAAACACAGAAAACATCCAGGTGGTAGAGGTATGGCTGGTGGTCAACACCATCACAGAATTAACTTGGATAAATACCATCCAGGTTACTTCGGTAAAGTTGGTATGAGATACTTCCACAAACAACAAAACCACTTCTGGAAACCAGTTTTGAACTTGGACAAATTGTGGACTTTGGTTCCAGAACAAAAAAGAGATGACTACTTGAAAAACGCTTCTGCTTCTTCTGCTCCAGTCATTGACACTTTGGCTGCTGGTTACGGGAAAGTCTTGGGTAAAGGTAGAATTCCAAACGTTCCAGTCATTGTCAAAGCCAGATTTGTTTCCAAATTG…	ATGCCTACTAGATTAACTAAAACCAGAAAACACAGAGGTCACGTCTCAGCCGGTAACGGTAGAGTTGGTAAACACAGAAAACATCCAGGTGGTAGAGGTATGGCTGGTGGTCAACACCATCACAGAATTAACTTGGATAAATACCATCCAGGTTACTTCGGTAAAGTTGGTATGAGATACTTCCACAAACAACAAAACCACTTCTGGAAACCAGTTTTGAACTTGGACAAATTGTGGACTTTGGTTCCAGAACAAAAAAGAGATGACTACTTGAAAAACGCTTCTGCTTCTTCTGCTCCAGTCATTGACACTTTGGCTGCTGGTTACGGGAAAGTCTTGGGTAAAGGTAGAATTCCAAACGTTCCAGTCATTGTCAAAGCCAGATTTGTTTCCAAATTG…	OK	450	YES	CAA	Glutamine	Glutamine (CAA)
yHMPu5000026147_hanseniaspora_vineae_190924.haplomerger2.g000798.m1	ATGCCTACTAGATTAACTAAAACCAGAAAACACAGAGGTCACGTCTCAGCCGGTAACGGTAGAGTTGGTAAACACAGAAAACATCCAGGTGGTAGAGGTATGGCTGGTGGTCAACACCACCACAGAATCAACTTGGATAAATACCATCCAGGTTACTTCGGTAAAGTTGGTATGAGATACTTCCACAAACAACAAAACCACTTTTGGAAACCAGTTTTGAACTTGGACAAATTGTGGACTTTGGTTCCAGAACAAAAAAGAGACGAATACTTGAAAAACGCTTCTTCTTCTTCTGCTCCAGTCATTGACACTTTGGCTGCTGGTTACGGTAAAGTCTTGGGTAAAGGTAGAATTCCAAACGTCCCAGTCATTGTCAAAGCCAGATTTGTCTCCAAATTG…	ATGCCTACTAGATTAACTAAAACCAGAAAACACAGAGGTCACGTCTCAGCCGGTAACGGTAGAGTTGGTAAACACAGAAAACATCCAGGTGGTAGAGGTATGGCTGGTGGTCAACACCACCACAGAATCAACTTGGATAAATACCATCCAGGTTACTTCGGTAAAGTTGGTATGAGATACTTCCACAAACAACAAAACCACTTTTGGAAACCAGTTTTGAACTTGGACAAATTGTGGACTTTGGTTCCAGAACAAAAAAGAGACGAATACTTGAAAAACGCTTCTTCTTCTTCTGCTCCAGTCATTGACACTTTGGCTGCTGGTTACGGTAAAGTCTTGGGTAAAGGTAGAATTCCAAACGTCCCAGTCATTGTCAAAGCCAGATTTGTCTCCAAATTG…	OK	450	YES	CAA	Glutamine	Glutamine (CAA)
yHMPu5000034955_hanseniaspora_valbyensis_201018.haplomerger2.g002991.m1	ATGCCTACTAGATTAACTAAAACCAGAAAACACAGAGGTCACGTCTCAGCCGGTAACGGTAGAATTGGTAAGCACAGAAAGCATCCGGGTGGTAGAGGTATGGCCGGTGGTCAACATCACCACAGAATCAACTTGGATAAGTACCATCCAGGTTACTTCGGTAAAGTTGGTATGAGATACTTCAACAAGCAACAAAACCAATTCTGGAAGCCAGTCTTAAACTTAGACAAGTTATGGACTTTAATTCCAGAAGATAAGAGAGATGAATACTTAAAGAACTCTTCTTCTGCTTCTGCTCCAGTCATCGACACCTTAGCTGCCGGTTATGGTAAGGTTTTGGGTAAGGGTAAGTTACCTCAAGTTCCAGTCATCGTCAAGGCTAGATTCGTTTCTAAGTTA…	ATGCCTACTAGATTAACTAAAACCAGAAAACACAGAGGTCACGTCTCAGCCGGTAACGGTAGAATTGGTAAGCACAGAAAGCATCCGGGTGGTAGAGGTATGGCCGGTGGTCAACATCACCACAGAATCAACTTGGATAAGTACCATCCAGGTTACTTCGGTAAAGTTGGTATGAGATACTTCAACAAGCAACAAAACCAATTCTGGAAGCCAGTCTTAAACTTAGACAAGTTATGGACTTTAATTCCAGAAGATAAGAGAGATGAATACTTAAAGAACTCTTCTTCTGCTTCTGCTCCAGTCATCGACACCTTAGCTGCCGGTTATGGTAAGGTTTTGGGTAAGGGTAAGTTACCTCAAGTTCCAGTCATCGTCAAGGCTAGATTCGTTTCTAAGTTA…	OK	450	YES	CAA	Glutamine	Glutamine (CAA)
yHMPu5000035685_hanseniaspora_1_sp_nov._diego_libkind_160519.g003782.m1	ATGCCTACTAGATTAACTAAAACCAGAAAACACAGAGGTCACGTCTCAGCCGGTAACGGTAGAATTGGTAAGCACAGAAAGCATCCAGGTGGTAGAGGTATGGCCGGTGGTCAACATCATCACAGAATCAACTTGGATAAGTACCATCCAGGTTACTTCGGTAAAGTTGGTATGAGATACTTCAACAAGCAACAAAACCAATTCTGGAAGCCAGTCTTAAACTTAGACAAGTTATGGACTTTGATTCCAGAAGAAAAGAGAGAAGAATACTTAAAGAAGAACTCTTCCGCTTCTGCTCCAGTCATCGACACCTTAGCTGCCGGTTACGGTAAGGTTTTGGGTAAGGGTAAGTTACCTCAAGTTCCAGTCATCGTCAAGGCTAGATTCGTTTCTAAGTTA…	ATGCCTACTAGATTAACTAAAACCAGAAAACACAGAGGTCACGTCTCAGCCGGTAACGGTAGAATTGGTAAGCACAGAAAGCATCCAGGTGGTAGAGGTATGGCCGGTGGTCAACATCATCACAGAATCAACTTGGATAAGTACCATCCAGGTTACTTCGGTAAAGTTGGTATGAGATACTTCAACAAGCAACAAAACCAATTCTGGAAGCCAGTCTTAAACTTAGACAAGTTATGGACTTTGATTCCAGAAGAAAAGAGAGAAGAATACTTAAAGAAGAACTCTTCCGCTTCTGCTCCAGTCATCGACACCTTAGCTGCCGGTTACGGTAAGGTTTTGGGTAAGGGTAAGTTACCTCAAGTTCCAGTCATCGTCAAGGCTAGATTCGTTTCTAAGTTA…	OK	450	YES	CAA	Glutamine	Glutamine (CAA)
yHMPu5000034663_kloeckera_lindneri_170307.g003873.m1	ATGCCTACTAGATTAACTAAAACCAGAAAACACAGAGGTCACGTCTCAGCCGGTAACGGTAGAATTGGTAAGCACAGAAAGCACCCGGGTGGTAGAGGTATGGCTGGTGGTCAACATCACCACAGAATCAACTTAGACAAGTACCACCCTGGTTACTTCGGTAAAGTTGGTATGAGATACTTCCACAAGCAACAAAACCACTTCTGGAAGCCAGTCTTAAACTTGGACAAGTTATGGACTTTGATCCCAGAAGAAAAGAGAGAAGAATACTTAAAGAACTCTTCTTCTGCTTCTGCTCCAGTTATTGACACTTTGGCTGCCGGTTACGGTAAGGTTTTGGGTAAGGGTAAGTTACCTCAAGTTCCAGTCATCGTCAAGGCTAGATTCGTTTCTAAGTTA…	ATGCCTACTAGATTAACTAAAACCAGAAAACACAGAGGTCACGTCTCAGCCGGTAACGGTAGAATTGGTAAGCACAGAAAGCACCCGGGTGGTAGAGGTATGGCTGGTGGTCAACATCACCACAGAATCAACTTAGACAAGTACCACCCTGGTTACTTCGGTAAAGTTGGTATGAGATACTTCCACAAGCAACAAAACCACTTCTGGAAGCCAGTCTTAAACTTGGACAAGTTATGGACTTTGATCCCAGAAGAAAAGAGAGAAGAATACTTAAAGAACTCTTCTTCTGCTTCTGCTCCAGTTATTGACACTTTGGCTGCCGGTTACGGTAAGGTTTTGGGTAAGGGTAAGTTACCTCAAGTTCCAGTCATCGTCAAGGCTAGATTCGTTTCTAAGTTA…	OK	450	YES	CAA	Glutamine	Glutamine (CAA)
yHMPu5000035696_hanseniaspora_singularis_160519.haplomerger2.g003281.m1	ATGCCTACTAGATTAACTAAAACCAGAAAACACAGAGGTCACGTCTCAGCCGGTAACGGTAGAATTGGTAAGCACAGAAAGCACCCGGGTGGTAGAGGTATGGCCGGTGGTCAACATCACCACAGAATTAACTTGGATAAGTACCATCCAGGTTACTTCGGTAAGGTTGGTATGAGATACTTCCACAAGCAACAAAACCACTTCTGGAAGCCAGTCTTAAACTTAGACAAGTTATGGACTTTAATCCCAGAAGAAAAGAGAGAAGAATACTTAAAGAACTCCTCTTCTGCTTCTGCTCCAGTTATCGACACTTTAGCTGCCGGTTACGGTAAGGTCTTAGGTAAGGGTAAGTTACCTCAAGTTCCAGTTATTGTCAAGGCTAGATTCGTTTCTAAGTTA…	ATGCCTACTAGATTAACTAAAACCAGAAAACACAGAGGTCACGTCTCAGCCGGTAACGGTAGAATTGGTAAGCACAGAAAGCACCCGGGTGGTAGAGGTATGGCCGGTGGTCAACATCACCACAGAATTAACTTGGATAAGTACCATCCAGGTTACTTCGGTAAGGTTGGTATGAGATACTTCCACAAGCAACAAAACCACTTCTGGAAGCCAGTCTTAAACTTAGACAAGTTATGGACTTTAATCCCAGAAGAAAAGAGAGAAGAATACTTAAAGAACTCCTCTTCTGCTTCTGCTCCAGTTATCGACACTTTAGCTGCCGGTTACGGTAAGGTCTTAGGTAAGGGTAAGTTACCTCAAGTTCCAGTTATTGTCAAGGCTAGATTCGTTTCTAAGTTA…	OK	450	YES	CAA	Glutamine	Glutamine (CAA)
yHMPu5000035692_hanseniaspora_jakobsenii_160519.haplomerger2.g003061.m1	ATGCCTACTAGATTAACTAAAACCAGAAAACACAGAGGTCACGTCTCAGCCGGTAACGGTAGAATTGGTAAGCACAGAAAGCACCCGGGTGGTAGAGGTATGGCCGGTGGTCAACATCACCACAGAATTAACTTGGATAAGTACCATCCAGGTTACTTCGGTAAGGTCGGTATGAGATACTTCCACAAGCAACAAAACCACTTCTGGAAGCCAGTCTTAAACTTAGACAAGTTATGGACTTTGATCCCTGAAGAAAAGAGAGAAGAATACTTAAAGAACGGTTCTTCCTCTTCTGCTCCAGTTATCGACACTTTAGCTGCTGGTTACGGTAAGGTCTTAGGTAAGGGTAAGTTACCTCAAGTTCCAGTCATCGTCAAGGCTAGATTCGTCTCCAAGTTA…	ATGCCTACTAGATTAACTAAAACCAGAAAACACAGAGGTCACGTCTCAGCCGGTAACGGTAGAATTGGTAAGCACAGAAAGCACCCGGGTGGTAGAGGTATGGCCGGTGGTCAACATCACCACAGAATTAACTTGGATAAGTACCATCCAGGTTACTTCGGTAAGGTCGGTATGAGATACTTCCACAAGCAACAAAACCACTTCTGGAAGCCAGTCTTAAACTTAGACAAGTTATGGACTTTGATCCCTGAAGAAAAGAGAGAAGAATACTTAAAGAACGGTTCTTCCTCTTCTGCTCCAGTTATCGACACTTTAGCTGCTGGTTACGGTAAGGTCTTAGGTAAGGGTAAGTTACCTCAAGTTCCAGTCATCGTCAAGGCTAGATTCGTCTCCAAGTTA…	OK	450	YES	CAA	Glutamine	Glutamine (CAA)
yHMPu5000035697_hanseniaspora_thailandica_160519.haplomerger2.g000552.m1	ATGCCTACTAGATTAACTAAAACCAGAAAACACAGAGGTCACGTCTCAGCCGGTAACGGTAGAATCGGTAAACACAGAAAGCATCCGGGTGGTAGAGGTATGGCTGGTGGTCAACATCACCACAGAATCAACTTAGATAAGTACCATCCAGGTTACTTCGGTAAAGTTGGTATGAGATACTTCCACAAGCAACAAAACCACTTCTGGAAGCCAGTCTTAAACTTAGACAAGTTATGGACTTTGATCCCAGAAGAAAAGAGAGAAGACTACTTAAAGAACTCTTCTTCTACCTCTGCCCCAGTCATCGACACTTTAGCTGCCGGTTACGGTAAGGTCTTAGGTAAGGGTAAGTTACCTCAAGTTCCAGTCATCGTCAAGGCTAGATTCGTTTCTAAGTTA…	ATGCCTACTAGATTAACTAAAACCAGAAAACACAGAGGTCACGTCTCAGCCGGTAACGGTAGAATCGGTAAACACAGAAAGCATCCGGGTGGTAGAGGTATGGCTGGTGGTCAACATCACCACAGAATCAACTTAGATAAGTACCATCCAGGTTACTTCGGTAAAGTTGGTATGAGATACTTCCACAAGCAACAAAACCACTTCTGGAAGCCAGTCTTAAACTTAGACAAGTTATGGACTTTGATCCCAGAAGAAAAGAGAGAAGACTACTTAAAGAACTCTTCTTCTACCTCTGCCCCAGTCATCGACACTTTAGCTGCCGGTTACGGTAAGGTCTTAGGTAAGGGTAAGTTACCTCAAGTTCCAGTCATCGTCAAGGCTAGATTCGTTTCTAAGTTA…	OK	450	YES	CAA	Glutamine	Glutamine (CAA)
yHMPu5000034960_hanseniaspora_meyeri_190924.haplomerger2.g002730.m1	ATGCCTACTAGATTAACTAAAACCAGAAAACACAGAGGTCACGTCTCAGCCGGTAACGGTAGAATCGGTAAACACAGAAAGCATCCGGGTGGTAGAGGTATGGCTGGTGGTCAACATCACCACAGAATCAACTTAGATAAGTACCATCCAGGTTACTTCGGTAAAGTTGGTATGAGATACTTCCACAAGCAACAAAACCACTTCTGGAAGCCAGTCTTAAACTTAGACAAGTTATGGACTTTGATCCCAGAACAAAAGAGAGAAGACTACTTAAAGAACGCTTCTGCCTCTTCTGCTCCAGTTATCGACACTTTAGCTGCCGGTTACGGTAAGGTCTTAGGTAAGGGTAAGCTACCTCAAGTTCCAGTCATCGTCAAGGCTAGATTCGTTTCTAAGTTA…	ATGCCTACTAGATTAACTAAAACCAGAAAACACAGAGGTCACGTCTCAGCCGGTAACGGTAGAATCGGTAAACACAGAAAGCATCCGGGTGGTAGAGGTATGGCTGGTGGTCAACATCACCACAGAATCAACTTAGATAAGTACCATCCAGGTTACTTCGGTAAAGTTGGTATGAGATACTTCCACAAGCAACAAAACCACTTCTGGAAGCCAGTCTTAAACTTAGACAAGTTATGGACTTTGATCCCAGAACAAAAGAGAGAAGACTACTTAAAGAACGCTTCTGCCTCTTCTGCTCCAGTTATCGACACTTTAGCTGCCGGTTACGGTAAGGTCTTAGGTAAGGGTAAGCTACCTCAAGTTCCAGTCATCGTCAAGGCTAGATTCGTTTCTAAGTTA…	OK	450	YES	CAA	Glutamine	Glutamine (CAA)
yHMPu5000034963_hanseniaspora_clermontiae_160519.haplomerger2.g000631.m1	ATGCCTACTAGATTAACTAAAACCAGAAAACACAGAGGTCACGTCTCAGCCGGTAACGGTAGAATCGGTAAACACAGAAAGCATCCGGGTGGTAGAGGTATGGCTGGTGGTCAACATCACCACAGAATCAACTTAGATAAGTACCATCCAGGTTACTTCGGTAAAGTTGGTATGAGATACTTCCACAAGCAACAAAACCACTTCTGGAAGCCAGTCTTAAACTTAGACAAGTTATGGACTTTGATCCCAGAACAAAAGAGAGAAGACTACTTAAAGAACTCTTCTGCCTCTTCTGCTCCAGTTATCGACACTTTAGCTGCCGGTTACGGTAAGGTCTTAGGTAAGGGTAAGCTTCCTCAAGTTCCAGTCATCGTCAAGGCTAGATTCGTTTCTAAGTTA…	ATGCCTACTAGATTAACTAAAACCAGAAAACACAGAGGTCACGTCTCAGCCGGTAACGGTAGAATCGGTAAACACAGAAAGCATCCGGGTGGTAGAGGTATGGCTGGTGGTCAACATCACCACAGAATCAACTTAGATAAGTACCATCCAGGTTACTTCGGTAAAGTTGGTATGAGATACTTCCACAAGCAACAAAACCACTTCTGGAAGCCAGTCTTAAACTTAGACAAGTTATGGACTTTGATCCCAGAACAAAAGAGAGAAGACTACTTAAAGAACTCTTCTGCCTCTTCTGCTCCAGTTATCGACACTTTAGCTGCCGGTTACGGTAAGGTCTTAGGTAAGGGTAAGCTTCCTCAAGTTCCAGTCATCGTCAAGGCTAGATTCGTTTCTAAGTTA…	OK	450	YES	CAA	Glutamine	Glutamine (CAA)
yHMPu5000034956_hanseniaspora_uvarum_170307.g003140.m1	ATGCCTACTAGATTAACTAAAACCAGAAAACACAGAGGTCACGTCTCAGCCGGTAACGGTAGAATCGGTAAACACAGAAAGCATCCGGGTGGTAGAGGTATGGCTGGTGGTCAACATCACCACAGAATCAACTTAGATAAGTACCATCCAGGTTACTTCGGTAAAGTTGGTATGAGATACTTCCACAAGCAACAAAACCACTTCTGGAAGCCAGTCTTAAACTTAGACAAGTTATGGACTTTAATCCCAGAAGAAAAGAGAGACGACTACTTAAAGAACTCTTCTTCCACTTCTGCTCCAGTCATCGACACTTTAGCTGCCGGTTACGGTAAGGTCTTAGGTAAGGGTAAATTACCTCAAGTTCCAGTCATCGTCAAGGCTAGATTCGTTTCTAAGTTA…	ATGCCTACTAGATTAACTAAAACCAGAAAACACAGAGGTCACGTCTCAGCCGGTAACGGTAGAATCGGTAAACACAGAAAGCATCCGGGTGGTAGAGGTATGGCTGGTGGTCAACATCACCACAGAATCAACTTAGATAAGTACCATCCAGGTTACTTCGGTAAAGTTGGTATGAGATACTTCCACAAGCAACAAAACCACTTCTGGAAGCCAGTCTTAAACTTAGACAAGTTATGGACTTTAATCCCAGAAGAAAAGAGAGACGACTACTTAAAGAACTCTTCTTCCACTTCTGCTCCAGTCATCGACACTTTAGCTGCCGGTTACGGTAAGGTCTTAGGTAAGGGTAAATTACCTCAAGTTCCAGTCATCGTCAAGGCTAGATTCGTTTCTAAGTTA…	OK	450	YES	CAA	Glutamine	Glutamine (CAA)
hanseniaspora_uvarum_g003859.m12	ATGCCTACTAGATTAACTAAAACCAGAAAACACAGAGGTCACGTCTCAGCCGGTAACGGTAGAATCGGTAAACACAGAAAGCATCCGGGTGGTAGAGGTATGGCTGGTGGTCAACATCACCACAGAATCAACTTAGATAAGTACCATCCAGGTTACTTCGGTAAAGTTGGTATGAGATACTTCCACAAGCAACAAAACCACTTCTGGAAGCCAGTCTTAAACTTAGACAAGTTATGGACTTTAATCCCAGAAGAAAAGAGAGACGACTACTTAAAGAACTCTTCTTCCACTTCTGCTCCAGTCATCGACACTTTAGCTGCCGGTTACGGTAAGGTCTTAGGTAAGGGTAAATTACCTCAAGTTCCAGTCATCGTCAAGGCTAGATTCGTTTCTAAGTTA…	ATGCCTACTAGATTAACTAAAACCAGAAAACACAGAGGTCACGTCTCAGCCGGTAACGGTAGAATCGGTAAACACAGAAAGCATCCGGGTGGTAGAGGTATGGCTGGTGGTCAACATCACCACAGAATCAACTTAGATAAGTACCATCCAGGTTACTTCGGTAAAGTTGGTATGAGATACTTCCACAAGCAACAAAACCACTTCTGGAAGCCAGTCTTAAACTTAGACAAGTTATGGACTTTAATCCCAGAAGAAAAGAGAGACGACTACTTAAAGAACTCTTCTTCCACTTCTGCTCCAGTCATCGACACTTTAGCTGCCGGTTACGGTAAGGTCTTAGGTAAGGGTAAATTACCTCAAGTTCCAGTCATCGTCAAGGCTAGATTCGTTTCTAAGTTA…	OK	450	YES	CAA	Glutamine	Glutamine (CAA)
yHMPu5000034961_hanseniaspora_lachancei_170307.haplomerger2.g001090.m1	ATGCCTACTAGATTAACTAAAACCAGAAAACACAGAGGTCACGTCTCAGCCGGTAACGGTAGAATCGGTAAACACAGAAAGCATCCGGGTGGTAGAGGTATGGCTGGTGGTCAACATCACCACAGAATCAACTTAGACAAGTACCATCCAGGTTACTTCGGTAAAGTTGGTATGAGATACTTCCACAAGCAACAAAACCACTTCTGGAAGCCAGTTTTAAACTTAGACAAGTTGTGGACTTTGATCCCAGAAGAAAAGAGAGAAGACTACTTAAAGAACGCTTCCTCTTCTTCTGCTCCAGTCATCGACACTTTAGCTGCTGGTTACGGTAAGGTCTTAGGTAAGGGTAAATTACCTCAAGTTCCAGTCATCGTCAAGGCTAGATTCGTCTCCAAGTTA…	ATGCCTACTAGATTAACTAAAACCAGAAAACACAGAGGTCACGTCTCAGCCGGTAACGGTAGAATCGGTAAACACAGAAAGCATCCGGGTGGTAGAGGTATGGCTGGTGGTCAACATCACCACAGAATCAACTTAGACAAGTACCATCCAGGTTACTTCGGTAAAGTTGGTATGAGATACTTCCACAAGCAACAAAACCACTTCTGGAAGCCAGTTTTAAACTTAGACAAGTTGTGGACTTTGATCCCAGAAGAAAAGAGAGAAGACTACTTAAAGAACGCTTCCTCTTCTTCTGCTCCAGTCATCGACACTTTAGCTGCTGGTTACGGTAAGGTCTTAGGTAAGGGTAAATTACCTCAAGTTCCAGTCATCGTCAAGGCTAGATTCGTCTCCAAGTTA…	OK	450	YES	CAA	Glutamine	Glutamine (CAA)
yHMPu5000035695_hanseniaspora_pseudoguilliermondii_160519.haplomerger2.g002734.m1	ATGCCTACTAGATTAACTAAAACCAGAAAACACAGAGGTCACGTCTCAGCCGGTAACGGTAGAATCGGTAAACACAGAAAGCACCCGGGTGGTAGAGGTATGGCTGGTGGTCAACATCACCACAGAATCAACTTAGATAAGTACCATCCAGGTTACTTCGGTAAGGTTGGTATGAGATACTTCCACAAGCAACAAAACCACTTCTGGAAGCCAGTCTTAAACTTAGACAAGTTATGGACTTTGATCCCAGAAGAAAAGAGAGAAGACTACTTAAAGAACGCTTCCTCTTCTTCTGCTCCAGTTATCGACACTTTAGCTGCTGGTTACGGTAAGGTCTTGGGTAAGGGTAAGTTACCTCAAGTTCCAGTCATCGTCAAGGCTAGATTCGTCTCCAAGTTA…	ATGCCTACTAGATTAACTAAAACCAGAAAACACAGAGGTCACGTCTCAGCCGGTAACGGTAGAATCGGTAAACACAGAAAGCACCCGGGTGGTAGAGGTATGGCTGGTGGTCAACATCACCACAGAATCAACTTAGATAAGTACCATCCAGGTTACTTCGGTAAGGTTGGTATGAGATACTTCCACAAGCAACAAAACCACTTCTGGAAGCCAGTCTTAAACTTAGACAAGTTATGGACTTTGATCCCAGAAGAAAAGAGAGAAGACTACTTAAAGAACGCTTCCTCTTCTTCTGCTCCAGTTATCGACACTTTAGCTGCTGGTTACGGTAAGGTCTTGGGTAAGGGTAAGTTACCTCAAGTTCCAGTCATCGTCAAGGCTAGATTCGTCTCCAAGTTA…	OK	450	YES	CAA	Glutamine	Glutamine (CAA)
yHMPu5000034962_hanseniaspora_guilliermondii_170307.g004146.m1	ATGCCTACTAGATTAACTAAAACCAGAAAACACAGAGGTCACGTCTCAGCCGGTAACGGTAGAATCGGTAAACACAGAAAGCACCCGGGTGGTAGAGGTATGGCTGGTGGTCAACATCACCACAGAATCAACTTAGATAAGTACCATCCAGGTTACTTCGGTAAAGTTGGTATGAGATACTTCCACAAGCAACAAAACCACTTCTGGAAGCCAGTCTTAAACTTAGACAAGTTATGGACTTTGATCCCAGAAGAAAAGAGAGAAGACTACTTAAAGAACGCTTCTTCCTCTTCTGCTCCAGTTATTGATACTTTAGCTGCTGGTTACGGTAAGGTCTTAGGTAAGGGTAAATTACCTCAAGTTCCAGTCATCGTCAAGGCTAGATTCGTTTCCAAGTTA…	ATGCCTACTAGATTAACTAAAACCAGAAAACACAGAGGTCACGTCTCAGCCGGTAACGGTAGAATCGGTAAACACAGAAAGCACCCGGGTGGTAGAGGTATGGCTGGTGGTCAACATCACCACAGAATCAACTTAGATAAGTACCATCCAGGTTACTTCGGTAAAGTTGGTATGAGATACTTCCACAAGCAACAAAACCACTTCTGGAAGCCAGTCTTAAACTTAGACAAGTTATGGACTTTGATCCCAGAAGAAAAGAGAGAAGACTACTTAAAGAACGCTTCTTCCTCTTCTGCTCCAGTTATTGATACTTTAGCTGCTGGTTACGGTAAGGTCTTAGGTAAGGGTAAATTACCTCAAGTTCCAGTCATCGTCAAGGCTAGATTCGTTTCCAAGTTA…	OK	450	YES	CAA	Glutamine	Glutamine (CAA)
candida_dubliniensis_g000263.m1	ATGCCTACTAGATTAACTAAAACCAGAAAACACAGAGGTAATGTTTCTGCCGGTAAGGGTAGAATTGGTAAACACAGAAAGCACCCGGGTGGTAGAGGTAAAGCTGGTGGTCAACATCATCACAGAACTAACTTGGATAAATACCATCCAGGTTACTTTGGTAAAGTTGGTATGAGATACTTCCACAAACAACAAAACCACTTTTGGAGACCAGAAATCAACTTGGACAAATTGTGGACTTTAGTTGATTCTGAAAAGAAAGACGAATACTTGAGCAAATCATCAGCTTCTGCTGCTCCAGTCATCGACACCTTGGCTCACGGTTACGGTAAAGTTTTGGGTAAAGGTAGATTACCAGAAGTTCCAGTCATTGTCAAAGCCAGATTTGTTTCTAAATTA…	ATGCCTACTAGATTAACTAAAACCAGAAAACACAGAGGTAATGTTTCTGCCGGTAAGGGTAGAATTGGTAAACACAGAAAGCACCCGGGTGGTAGAGGTAAAGCTGGTGGTCAACATCATCACAGAACTAACTTGGATAAATACCATCCAGGTTACTTTGGTAAAGTTGGTATGAGATACTTCCACAAACAACAAAACCACTTTTGGAGACCAGAAATCAACTTGGACAAATTGTGGACTTTAGTTGATTCTGAAAAGAAAGACGAATACTTGAGCAAATCATCAGCTTCTGCTGCTCCAGTCATCGACACCTTGGCTCACGGTTACGGTAAAGTTTTGGGTAAAGGTAGATTACCAGAAGTTCCAGTCATTGTCAAAGCCAGATTTGTTTCTAAATTA…	OK	450	YES	CAA	Glutamine	Glutamine (CAA)
yHMPu5000034991_candida_dubliniensis_190924.haplomerger2_g001392.m1	ATGCCTACTAGATTAACTAAAACCAGAAAACACAGAGGTAATGTTTCTGCCGGTAAGGGTAGAATTGGTAAACACAGAAAGCACCCGGGTGGTAGAGGTAAAGCTGGTGGTCAACATCATCACAGAACTAACTTGGATAAATACCATCCAGGTTACTTTGGTAAAGTTGGTATGAGATACTTCCACAAACAACAAAACCACTTTTGGAGACCAGAAATCAACTTGGACAAATTGTGGACTTTAGTTGATTCTGAAAAGAAAGACGAATACTTGAGCAAATCATCAGCTTCTGCTGCTCCAGTCATCGACACCTTGGCTCACGGTTACGGTAAAGTTTTGGGTAAAGGTAGATTACCAGAAGTTCCAGTCATTGTCAAAGCCAGATTTGTTTCTAAATTA…	ATGCCTACTAGATTAACTAAAACCAGAAAACACAGAGGTAATGTTTCTGCCGGTAAGGGTAGAATTGGTAAACACAGAAAGCACCCGGGTGGTAGAGGTAAAGCTGGTGGTCAACATCATCACAGAACTAACTTGGATAAATACCATCCAGGTTACTTTGGTAAAGTTGGTATGAGATACTTCCACAAACAACAAAACCACTTTTGGAGACCAGAAATCAACTTGGACAAATTGTGGACTTTAGTTGATTCTGAAAAGAAAGACGAATACTTGAGCAAATCATCAGCTTCTGCTGCTCCAGTCATCGACACCTTGGCTCACGGTTACGGTAAAGTTTTGGGTAAAGGTAGATTACCAGAAGTTCCAGTCATTGTCAAAGCCAGATTTGTTTCTAAATTA…	OK	450	YES	CAA	Glutamine	Glutamine (CAA)
candida_albicans_g005268.m1	ATGCCTACTAGATTAACTAAAACCAGAAAACACAGAGGTAATGTTTCTGCCGGTAAGGGTAGAATTGGTAAACACAGAAAGCACCCGGGTGGTAGAGGTAAAGCTGGTGGTCAACATCATCACAGAACCAACTTGGATAAATACCATCCAGGTTACTTCGGTAAAGTTGGTATGAGATACTTCCACAAACAACAAAACCACTTCTGGAGACCAGAAATCAACTTGGACAAATTGTGGACTTTAGTTGATTCTGAAAAGAAAGACGAATACTTGAGCAAATCATCTGCTTCTGCTGCTCCAGTCATCGACACCTTGGCTCACGGTTACGGTAAAGTTTTGGGTAAAGGTAGATTACCAGAAGTTCCAGTCATTGTCAAAGCCAGATTTGTTTCTAAATTA…	ATGCCTACTAGATTAACTAAAACCAGAAAACACAGAGGTAATGTTTCTGCCGGTAAGGGTAGAATTGGTAAACACAGAAAGCACCCGGGTGGTAGAGGTAAAGCTGGTGGTCAACATCATCACAGAACCAACTTGGATAAATACCATCCAGGTTACTTCGGTAAAGTTGGTATGAGATACTTCCACAAACAACAAAACCACTTCTGGAGACCAGAAATCAACTTGGACAAATTGTGGACTTTAGTTGATTCTGAAAAGAAAGACGAATACTTGAGCAAATCATCTGCTTCTGCTGCTCCAGTCATCGACACCTTGGCTCACGGTTACGGTAAAGTTTTGGGTAAAGGTAGATTACCAGAAGTTCCAGTCATTGTCAAAGCCAGATTTGTTTCTAAATTA…	OK	450	YES	CAA	Glutamine	Glutamine (CAA)
yHMPu5000035004_candida_albicans_190924_g003498.m1	ATGCCTACTAGATTAACTAAAACCAGAAAACACAGAGGTAATGTTTCTGCCGGTAAGGGTAGAATTGGTAAACACAGAAAGCACCCGGGTGGTAGAGGTAAAGCTGGTGGTCAACATCATCACAGAACCAACTTGGATAAATACCATCCAGGTTACTTCGGTAAAGTTGGTATGAGATACTTCCACAAACAACAAAACCACTTCTGGAGACCAGAAATCAACTTGGACAAATTGTGGACTTTAGTTGATTCTGAAAAGAAAGACGAATACTTGAGCAAGTCATCTGCTTCTGCTGCTCCAGTCATCGACACCTTGGCTCACGGTTACGGTAAAGTTTTGGGTAAAGGTAGATTACCAGAAGTTCCAGTCATTGTCAAAGCCAGATTTGTTTCCAAATTA…	ATGCCTACTAGATTAACTAAAACCAGAAAACACAGAGGTAATGTTTCTGCCGGTAAGGGTAGAATTGGTAAACACAGAAAGCACCCGGGTGGTAGAGGTAAAGCTGGTGGTCAACATCATCACAGAACCAACTTGGATAAATACCATCCAGGTTACTTCGGTAAAGTTGGTATGAGATACTTCCACAAACAACAAAACCACTTCTGGAGACCAGAAATCAACTTGGACAAATTGTGGACTTTAGTTGATTCTGAAAAGAAAGACGAATACTTGAGCAAGTCATCTGCTTCTGCTGCTCCAGTCATCGACACCTTGGCTCACGGTTACGGTAAAGTTTTGGGTAAAGGTAGATTACCAGAAGTTCCAGTCATTGTCAAAGCCAGATTTGTTTCCAAATTA…	OK	450	YES	CAA	Glutamine	Glutamine (CAA)
yHMPu5000038374_candida_jiufengensis_170713_g000291.m1	ATGCCTACTAGATTAACTAAAACCAGAAAACACAGAGGTAATGTTTCTGCCGGTAAAGGTAGAGTTGGTAAACACAGAAAACATCCAGGTGGTAGAGGTAAAGCTGGTGGTTTCCATCATCATAGAACAAATTTAGATAAATATCATCCAGGTTATTTTGGTAAAGTTGGTATGAGATATTTCCATAAACAACAAAATCATTTTTGGAGACCAGAAATTAATTTAGATAAATTATGGACTTTAATTGAATCAGATAAAAAAGATGAATATTTACAATCATCATCAAAATCAGCTGCTCCAGTTATTGATACTTTAGCTCATGGTTATGGTAAAGTATTAGGTAAAGGTAGATTGCCAGAAGTTCCAGTTATTGTTAAAGCTAGATTTGTTTCAAAATTA…	ATGCCTACTAGATTAACTAAAACCAGAAAACACAGAGGTAATGTTTCTGCCGGTAAAGGTAGAGTTGGTAAACACAGAAAACATCCAGGTGGTAGAGGTAAAGCTGGTGGTTTCCATCATCATAGAACAAATTTAGATAAATATCATCCAGGTTATTTTGGTAAAGTTGGTATGAGATATTTCCATAAACAACAAAATCATTTTTGGAGACCAGAAATTAATTTAGATAAATTATGGACTTTAATTGAATCAGATAAAAAAGATGAATATTTACAATCATCATCAAAATCAGCTGCTCCAGTTATTGATACTTTAGCTCATGGTTATGGTAAAGTATTAGGTAAAGGTAGATTGCCAGAAGTTCCAGTTATTGTTAAAGCTAGATTTGTTTCAAAATTA…	OK	450	YES	TTC	Phenylalanine	Phenylalanine (TTC)
yHMPu5000035715_candida_gigantensis_160519.haplomerger2_g000800.m1	ATGCCTACTAGATTAACTAAAACCAGAAAACACAGAGGTAACGTTTCTGCCGGTAAGGGTAGAATTGGTAAACACAGAAAGCACCCGGGTGGTAGAGGTAAAGCTGGTGGTCAACATCATCACAGAACCAATTTGGATAAATACCATCCAGGTTACTTCGGTAAAGTTGGTATGAGATACTTCCACAAACAACAAAACCACTTCTGGAGACCAGAAATCAACTTGGACAAATTATGGACTTTAGTTGAATCTGACAAAAAAGACGAATACTTGTCTAAATCTTCTGCTTCTGCTGCCCCAGTCATTGACACCTTAGCTGCCGGTTACGGTAAAGTCTTGGGTAAAGGTAGATTACCAGAAGTTCCAGTCATTGTCAAAGCCAGATTTGTTTCTAAATTA…	ATGCCTACTAGATTAACTAAAACCAGAAAACACAGAGGTAACGTTTCTGCCGGTAAGGGTAGAATTGGTAAACACAGAAAGCACCCGGGTGGTAGAGGTAAAGCTGGTGGTCAACATCATCACAGAACCAATTTGGATAAATACCATCCAGGTTACTTCGGTAAAGTTGGTATGAGATACTTCCACAAACAACAAAACCACTTCTGGAGACCAGAAATCAACTTGGACAAATTATGGACTTTAGTTGAATCTGACAAAAAAGACGAATACTTGTCTAAATCTTCTGCTTCTGCTGCCCCAGTCATTGACACCTTAGCTGCCGGTTACGGTAAAGTCTTGGGTAAAGGTAGATTACCAGAAGTTCCAGTCATTGTCAAAGCCAGATTTGTTTCTAAATTA…	OK	450	YES	CAA	Glutamine	Glutamine (CAA)
candida_tropicalis_g000794.m1	ATGCCTACTAGATTAACTAAAACCAGAAAACACAGAGGTAACGTTTCTGCCGGTAAGGGTAGAATTGGTAAACACAGAAAGCACCCGGGTGGTAGAGGTAAAGCTGGTGGTCAACATCATCACAGAACCAACTTGGATAAATACCATCCAGGTTACTTCGGTAAAGTTGGTATGAGATACTTCCACAAACAACAAAACCACTTCTGGAGACCAGAAATCAACTTGGACAAATTGTGGACTTTGGTTGATGCCGACAAGAAAGAAGAATACTTGACCAAATCTTCTGCTTCTGCTGCCCCAGTCATTGACACCTTGGCTCACGGTTACGGTAAAGTTTTGGGTAAAGGTAGATTACCAGAAGTTCCAGTCATTGTCAAAGCCAGATTTGTTTCTAAATTA…	ATGCCTACTAGATTAACTAAAACCAGAAAACACAGAGGTAACGTTTCTGCCGGTAAGGGTAGAATTGGTAAACACAGAAAGCACCCGGGTGGTAGAGGTAAAGCTGGTGGTCAACATCATCACAGAACCAACTTGGATAAATACCATCCAGGTTACTTCGGTAAAGTTGGTATGAGATACTTCCACAAACAACAAAACCACTTCTGGAGACCAGAAATCAACTTGGACAAATTGTGGACTTTGGTTGATGCCGACAAGAAAGAAGAATACTTGACCAAATCTTCTGCTTCTGCTGCCCCAGTCATTGACACCTTGGCTCACGGTTACGGTAAAGTTTTGGGTAAAGGTAGATTACCAGAAGTTCCAGTCATTGTCAAAGCCAGATTTGTTTCTAAATTA…	OK	450	YES	CAA	Glutamine	Glutamine (CAA)
yHMPu5000034997_candida_tropicalis_160519.haplomerger2_g001409.m1	ATGCCTACTAGATTAACTAAAACCAGAAAACACAGAGGTAACGTTTCTGCCGGTAAGGGTAGAATTGGTAAACACAGAAAGCACCCGGGTGGTAGAGGTAAAGCTGGTGGTCAACATCATCACAGAACCAACTTGGATAAATACCATCCAGGTTACTTCGGTAAAGTTGGTATGAGATACTTCCACAAACAACAAAACCACTTCTGGAGACCAGAAATCAACTTGGACAAATTGTGGACTTTGGTTGATGCCGACAAGAAAGAAGAATACTTGACCAAATCTTCTGCTTCTGCTGCCCCAGTCATTGACACCTTGGCTCACGGTTACGGTAAAGTTTTGGGTAAAGGTAGATTACCAGAAGTTCCAGTCATTGTCAAAGCCAGATTTGTTTCTAAATTA…	ATGCCTACTAGATTAACTAAAACCAGAAAACACAGAGGTAACGTTTCTGCCGGTAAGGGTAGAATTGGTAAACACAGAAAGCACCCGGGTGGTAGAGGTAAAGCTGGTGGTCAACATCATCACAGAACCAACTTGGATAAATACCATCCAGGTTACTTCGGTAAAGTTGGTATGAGATACTTCCACAAACAACAAAACCACTTCTGGAGACCAGAAATCAACTTGGACAAATTGTGGACTTTGGTTGATGCCGACAAGAAAGAAGAATACTTGACCAAATCTTCTGCTTCTGCTGCCCCAGTCATTGACACCTTGGCTCACGGTTACGGTAAAGTTTTGGGTAAAGGTAGATTACCAGAAGTTCCAGTCATTGTCAAAGCCAGATTTGTTTCTAAATTA…	OK	450	YES	CAA	Glutamine	Glutamine (CAA)
yHMPu5000034994_candida_neerlandica_190924_g004996.m1	ATGCCTACTAGATTAACTAAAACCAGAAAACACAGAGGTAACGTTTCTGCCGGTAAGGGTAGAATTGGTAAACACAGAAAGCACCCGGGTGGTAGAGGTAAAGCTGGTGGTCAACATCATCACAGAACCAACTTGGATAAATACCATCCAGGTTACTTCGGTAAAGTTGGTATGAGATACTTCCACAAACAACAAAACCACTTCTGGAGACCAGAAATCAACTTGGACAAATTGTGGACCTTGGTTGAATCCGACAAAAAAGAAGAATACTTGTCTAAATCTTCTGCTTCCGCTGCCCCAGTCATTGACACCTTAGCTCACGGTTACGGTAAAGTTTTGGGTAAAGGTAGATTGCCAGAAGTTCCAGTCATTGTCAAAGCCAGATTTGTTTCTAAATTA…	ATGCCTACTAGATTAACTAAAACCAGAAAACACAGAGGTAACGTTTCTGCCGGTAAGGGTAGAATTGGTAAACACAGAAAGCACCCGGGTGGTAGAGGTAAAGCTGGTGGTCAACATCATCACAGAACCAACTTGGATAAATACCATCCAGGTTACTTCGGTAAAGTTGGTATGAGATACTTCCACAAACAACAAAACCACTTCTGGAGACCAGAAATCAACTTGGACAAATTGTGGACCTTGGTTGAATCCGACAAAAAAGAAGAATACTTGTCTAAATCTTCTGCTTCCGCTGCCCCAGTCATTGACACCTTAGCTCACGGTTACGGTAAAGTTTTGGGTAAAGGTAGATTGCCAGAAGTTCCAGTCATTGTCAAAGCCAGATTTGTTTCTAAATTA…	OK	450	YES	CAA	Glutamine	Glutamine (CAA)
yHMPu5000035718_Candida_tetrigidarum_SPADES.haplomerger2_g000090.m1	ATGCCTACTAGATTAACTAAAACCAGAAAACACAGAGGTAACGTTTCTGCCGGTAAGGGTAGAATTGGTAAACACAGAAAGCACCCGGGTGGTAGAGGTAAAGCTGGTGGTCAACATCATCACAGAACCAACTTGGATAAATACCATCCAGGTTACTTCGGTAAAGTTGGTATGAGATACTTCCACAAACAACAAAACCACTTCTGGAGACCAGAAATCAACTTGGACAAATTATGGACCTTGGTTGAATCTGACAAAAAAGACGAATACTTGTCTAAATCCTCTGCTTCCGCTGCTCCAGTCATTGACACTTTAGCTCACGGTTACGGTAAAGTTTTGGGTAAAGGTAGATTACCAGAAGTTCCAGTCATTGTCAAAGCTAGATTCGTTTCTAAATTA…	ATGCCTACTAGATTAACTAAAACCAGAAAACACAGAGGTAACGTTTCTGCCGGTAAGGGTAGAATTGGTAAACACAGAAAGCACCCGGGTGGTAGAGGTAAAGCTGGTGGTCAACATCATCACAGAACCAACTTGGATAAATACCATCCAGGTTACTTCGGTAAAGTTGGTATGAGATACTTCCACAAACAACAAAACCACTTCTGGAGACCAGAAATCAACTTGGACAAATTATGGACCTTGGTTGAATCTGACAAAAAAGACGAATACTTGTCTAAATCCTCTGCTTCCGCTGCTCCAGTCATTGACACTTTAGCTCACGGTTACGGTAAAGTTTTGGGTAAAGGTAGATTACCAGAAGTTCCAGTCATTGTCAAAGCTAGATTCGTTTCTAAATTA…	OK	450	YES	CAA	Glutamine	Glutamine (CAA)
yHMPu5000035714_candida_frijolesensis_160519.haplomerger2_g003416.m1	ATGCCTACTAGATTAACTAAAACCAGAAAACACAGAGGTAACGTTTCTGCCGGTAAGGGTAGAATTGGTAAACACAGAAAGCACCCGGGTGGTAGAGGTAAAGCTGGTGGTCAACATCATCACAGAACCAACTTGGATAAATACCATCCAGGTTACTTCGGTAAAGTTGGTATGAGATACTTCCACAAACAACAAAACCACTTCTGGAGACCAGAAATCAACTTGGACAAATTATGGACCTTGGTTGAATCTGACAAGAAAGAAGAATACTTGTCCAAATCTTCTGCTTCCGCTGCCCCAGTCATTGACACCTTGGCTCACGGTTACGGTAAAGTTTTGGGTAAAGGTAGATTACCAGAAGTTCCAGTCATTGTCAAAGCCAGATTTGTTTCTAAATTA…	ATGCCTACTAGATTAACTAAAACCAGAAAACACAGAGGTAACGTTTCTGCCGGTAAGGGTAGAATTGGTAAACACAGAAAGCACCCGGGTGGTAGAGGTAAAGCTGGTGGTCAACATCATCACAGAACCAACTTGGATAAATACCATCCAGGTTACTTCGGTAAAGTTGGTATGAGATACTTCCACAAACAACAAAACCACTTCTGGAGACCAGAAATCAACTTGGACAAATTATGGACCTTGGTTGAATCTGACAAGAAAGAAGAATACTTGTCCAAATCTTCTGCTTCCGCTGCCCCAGTCATTGACACCTTGGCTCACGGTTACGGTAAAGTTTTGGGTAAAGGTAGATTACCAGAAGTTCCAGTCATTGTCAAAGCCAGATTTGTTTCTAAATTA…	OK	450	YES	CAA	Glutamine	Glutamine (CAA)
candida_sojae_g003362.m1	ATGCCTACTAGATTAACTAAAACCAGAAAACACAGAGGTAACGTTTCTGCCGGTAAGGGTAGAATTGGTAAACACAGAAAGCACCCGGGTGGTAGAGGTAAAGCTGGTGGTCAACATCACCACAGAACCAATTTGGATAAATACCATCCAGGTTACTTCGGTAAAGTTGGTATGAGATACTTCCACAAACAACAAAACCACTTCTGGAGACCAGAAATCAACTTGGACAAATTGTGGACTTTAGTTGAAGCCGACAAGAAAGAAGAATACTTGACCAAATCCTCTGCTTCCGCTGCCCCAGTCATTGACACTTTGGCTCACGGTTACGGTAAAGTTTTGGGAAAAGGTAGATTACCAGAAGTTCCAGTCATTGTCAAAGCCAGATTTGTTTCTAAATTA…	ATGCCTACTAGATTAACTAAAACCAGAAAACACAGAGGTAACGTTTCTGCCGGTAAGGGTAGAATTGGTAAACACAGAAAGCACCCGGGTGGTAGAGGTAAAGCTGGTGGTCAACATCACCACAGAACCAATTTGGATAAATACCATCCAGGTTACTTCGGTAAAGTTGGTATGAGATACTTCCACAAACAACAAAACCACTTCTGGAGACCAGAAATCAACTTGGACAAATTGTGGACTTTAGTTGAAGCCGACAAGAAAGAAGAATACTTGACCAAATCCTCTGCTTCCGCTGCCCCAGTCATTGACACTTTGGCTCACGGTTACGGTAAAGTTTTGGGAAAAGGTAGATTACCAGAAGTTCCAGTCATTGTCAAAGCCAGATTTGTTTCTAAATTA…	OK	450	YES	CAA	Glutamine	Glutamine (CAA)
yHMPu5000034996_candida_sojae_SPADES_g005397.m1	ATGCCTACTAGATTAACTAAAACCAGAAAACACAGAGGTAACGTTTCTGCCGGTAAGGGTAGAATTGGTAAACACAGAAAGCACCCGGGTGGTAGAGGTAAAGCTGGTGGTCAACATCACCACAGAACCAATTTGGATAAATACCATCCAGGTTACTTCGGTAAAGTTGGTATGAGATACTTCCACAAACAACAAAACCACTTCTGGAGACCAGAAATCAACTTGGACAAATTGTGGACTTTAGTTGAAGCCGACAAGAAAGAAGAATACTTGACCAAATCCTCTGCTTCCGCTGCCCCAGTCATTGACACTTTGGCTCACGGTTACGGTAAAGTTTTGGGAAAAGGTAGATTACCAGAAGTTCCAGTCATTGTCAAAGCCAGATTTGTTTCTAAATTA…	ATGCCTACTAGATTAACTAAAACCAGAAAACACAGAGGTAACGTTTCTGCCGGTAAGGGTAGAATTGGTAAACACAGAAAGCACCCGGGTGGTAGAGGTAAAGCTGGTGGTCAACATCACCACAGAACCAATTTGGATAAATACCATCCAGGTTACTTCGGTAAAGTTGGTATGAGATACTTCCACAAACAACAAAACCACTTCTGGAGACCAGAAATCAACTTGGACAAATTGTGGACTTTAGTTGAAGCCGACAAGAAAGAAGAATACTTGACCAAATCCTCTGCTTCCGCTGCCCCAGTCATTGACACTTTGGCTCACGGTTACGGTAAAGTTTTGGGAAAAGGTAGATTACCAGAAGTTCCAGTCATTGTCAAAGCCAGATTTGTTTCTAAATTA…	OK	450	YES	CAA	Glutamine	Glutamine (CAA)
yHMPu5000038367_candida_pseudojiufengensis_170713_g001002.m1	ATGCCTACTAGATTAACTAAAACCAGAAAACACAGAGGACATGTTTCTGCCGGTAAAGGTAGAGTTGGTAAACACAGAAAAAATCCCGGTGGTAGAGGTAAAGCTGGTGGTCAACATCATCATAGAACAAATTTAGATAAATTTCATCCAGGTTACTTTGGTAAAGTTGGTATGAGATATTTCCACAAACAACAAAATCACTTTTGGAGACCAGAAATTAACTTAGATAAATTATGGACTTTAATTGAATCAGATAAAAAAGATGAATATTTACAATCATCATCAAAATCAGCTGCCCCAGTCATTGATACTTTAGCTCACGGATACGGTAAAGTATTGGGTAAAGGTAGATTACCAGAAGTTCCAGTTATTGTTAAAGCTAGATTTGTATCAAAATTA…	ATGCCTACTAGATTAACTAAAACCAGAAAACACAGAGGACATGTTTCTGCCGGTAAAGGTAGAGTTGGTAAACACAGAAAAAATCCCGGTGGTAGAGGTAAAGCTGGTGGTCAACATCATCATAGAACAAATTTAGATAAATTTCATCCAGGTTACTTTGGTAAAGTTGGTATGAGATATTTCCACAAACAACAAAATCACTTTTGGAGACCAGAAATTAACTTAGATAAATTATGGACTTTAATTGAATCAGATAAAAAAGATGAATATTTACAATCATCATCAAAATCAGCTGCCCCAGTCATTGATACTTTAGCTCACGGATACGGTAAAGTATTGGGTAAAGGTAGATTACCAGAAGTTCCAGTTATTGTTAAAGCTAGATTTGTATCAAAATTA…	OK	450	YES	CAA	Glutamine	Glutamine (CAA)
yHMPu5000038080_candida_tallmaniae_201018_g003258.m1	ATGCCTACTAGATTAACTAAAACCAGAAAACACAGAGGACACGTTTCGGCCGGTCGTGGTAGAATTGGTAAGCACAGAAAGCATCCAGGTGGTAGAGGTATGGCTGGTGGTCAACACCACCACAGAACTAACTTGGATAAGTACCACCCAGGTTACTTCGGTAAAGTTGGTATGAGATACTTCCACAAGCAACAAAACCACTTCTGGAGACCAGAAATCAACTTGGACAAATTGTGGACTTTGGTTGAATCTGACAAGAAGGATGAATACTTGAAGAACGCTTCTACCTCTGCTGCTCCAGTCATTGACACTTTGGCTCACGGTTACGGTAAAGTCTTAGGTAAGGGTAGATTGCCACAAGTTCCTGTTATTGTCAAGGCCAGATTTGTTTCCAAGTTG…	ATGCCTACTAGATTAACTAAAACCAGAAAACACAGAGGACACGTTTCGGCCGGTCGTGGTAGAATTGGTAAGCACAGAAAGCATCCAGGTGGTAGAGGTATGGCTGGTGGTCAACACCACCACAGAACTAACTTGGATAAGTACCACCCAGGTTACTTCGGTAAAGTTGGTATGAGATACTTCCACAAGCAACAAAACCACTTCTGGAGACCAGAAATCAACTTGGACAAATTGTGGACTTTGGTTGAATCTGACAAGAAGGATGAATACTTGAAGAACGCTTCTACCTCTGCTGCTCCAGTCATTGACACTTTGGCTCACGGTTACGGTAAAGTCTTAGGTAAGGGTAGATTGCCACAAGTTCCTGTTATTGTCAAGGCCAGATTTGTTTCCAAGTTG…	OK	450	YES	CAA	Glutamine	Glutamine (CAA)
yHMPu5000038031_Yamadazyma_olivae_SPADES_g000781.m1	ATGCCTACTAGATTAACTAAAACCAGAAAACACAGAGGACACGTTTCAGCCGGTTACGGTAGAATTGGTAAACATAGAAAGCACTCCGGTGGTAGAGGTATGGCTGGTGGTCAACATCACCACAGAACCAATTTAGATAAATACCACCCAGGTTATTTCGGTAAAGTTGGTATGAGATACTTCCACAAACAACGTAACCACTTCTGGAAACCAGAAATCAACTTGGACAAATTATGGACTTTAGTTGAATCTGACAAAAAAGACGAATACTTAAAAAACGCCTCAGCTTCTGCTGCTCCAGTTATTGACACTTTAGCTCACGGTTACGGTAAAGTTTTAGGTAAAGGTAGATTACCACAAGTTCCAGTCATTGTCAAAGCCAGATTTGTTTCTAAATTA…	ATGCCTACTAGATTAACTAAAACCAGAAAACACAGAGGACACGTTTCAGCCGGTTACGGTAGAATTGGTAAACATAGAAAGCACTCCGGTGGTAGAGGTATGGCTGGTGGTCAACATCACCACAGAACCAATTTAGATAAATACCACCCAGGTTATTTCGGTAAAGTTGGTATGAGATACTTCCACAAACAACGTAACCACTTCTGGAAACCAGAAATCAACTTGGACAAATTATGGACTTTAGTTGAATCTGACAAAAAAGACGAATACTTAAAAAACGCCTCAGCTTCTGCTGCTCCAGTTATTGACACTTTAGCTCACGGTTACGGTAAAGTTTTAGGTAAAGGTAGATTACCACAAGTTCCAGTCATTGTCAAAGCCAGATTTGTTTCTAAATTA…	OK	450	YES	CAA	Glutamine	Glutamine (CAA)
yHMPu5000037914_candida_conglobata_180604_g004307.m1	ATGCCTACTAGATTAACTAAAACCAGAAAACACAGAGGACACGTTTCAGCCGGTCACGGTAGAATTGGTAAACACAGAAAGCATCCCGGTGGTAGAGGTATGGCTGGTGGTCAACACCACCACAGAACCAACTTGGATAAATACCATCCAGGTTACTTCGGTAAAGTTGGTATGAGATACTTCCACAAACAACCAAACCACTTCTGGAGACCAGAAATCAACTTAGACAAATTATGGACTTTAGTTGATGAAACCAAAAAAGACGAATACTTAAAATCCTCTTCTAAATCCGCTGCTCCAGTCATCGACACCTTAGCTTTCGGTTACGGTAAAGTTTTAGGTAAAGGTAGATTACCAGAAGTTCCAGTCATTGTCAAAGCCAGATTTGTTTCCAAATTA…	ATGCCTACTAGATTAACTAAAACCAGAAAACACAGAGGACACGTTTCAGCCGGTCACGGTAGAATTGGTAAACACAGAAAGCATCCCGGTGGTAGAGGTATGGCTGGTGGTCAACACCACCACAGAACCAACTTGGATAAATACCATCCAGGTTACTTCGGTAAAGTTGGTATGAGATACTTCCACAAACAACCAAACCACTTCTGGAGACCAGAAATCAACTTAGACAAATTATGGACTTTAGTTGATGAAACCAAAAAAGACGAATACTTAAAATCCTCTTCTAAATCCGCTGCTCCAGTCATCGACACCTTAGCTTTCGGTTACGGTAAAGTTTTAGGTAAAGGTAGATTACCAGAAGTTCCAGTCATTGTCAAAGCCAGATTTGTTTCCAAATTA…	OK	450	YES	CAA	Glutamine	Glutamine (CAA)
yHMPu5000038034_yamadazyma_epiphylla_170912_g003010.m1	ATGCCTACTAGATTAACTAAAACCAGAAAACACAGAGGACACGTTTCAGCCGGTAGAGGTAGAATTGGTAAACACAGAAAACATCCCGGTGGTAGAGGTATGGCTGGTGGTCAACACCACCACAGAACCAACTTGGATAAATACCATCCAGGTTACTTCGGTAAAGTTGGTATGAGATACTTCCACAAACAACAAAACCATTTCTGGAGACCAGAAATTAACTTAGACAAATTATGGACTTTAGTTGATGAAGACAAAAAAGAACAATACTTAAAATCTTCTTCTGCTTCTGCTGCTCCAGTTATTGACACCTTAGCTCACGGTTACGGTAAAGTTTTAGGTAAAGGTAGATTACCAGAAGTTCCAGTCATTGTCAAAGCCAGATTTGTTTCTAAATTA…	ATGCCTACTAGATTAACTAAAACCAGAAAACACAGAGGACACGTTTCAGCCGGTAGAGGTAGAATTGGTAAACACAGAAAACATCCCGGTGGTAGAGGTATGGCTGGTGGTCAACACCACCACAGAACCAACTTGGATAAATACCATCCAGGTTACTTCGGTAAAGTTGGTATGAGATACTTCCACAAACAACAAAACCATTTCTGGAGACCAGAAATTAACTTAGACAAATTATGGACTTTAGTTGATGAAGACAAAAAAGAACAATACTTAAAATCTTCTTCTGCTTCTGCTGCTCCAGTTATTGACACCTTAGCTCACGGTTACGGTAAAGTTTTAGGTAAAGGTAGATTACCAGAAGTTCCAGTCATTGTCAAAGCCAGATTTGTTTCTAAATTA…	OK	450	YES	CAA	Glutamine	Glutamine (CAA)
yHMPu5000037248_nematodospora_valgi_210210_g002908.m1	ATGCCTACTAGATTAACTAAAACCAGAAAACACAGAGGAAACGTTTCTGCCGGTAAGGGTAGAGTTGGTAAACACAGAAAACATCCCGGTGGTAGAGGTAAAGCTGGTGGTGCTCATCATCACAGAACCAATTTAGATAAATACCATCCAGGTTATTTTGGTAAAGTTGGTATGAGATACTTCCACAAACAACAAAACCACTTCTGGAGACCAGAAATCAACTTGGACAAATTATGGACCTTAGTGGACTCAGATAAGAAAGATGAATACTTGCAATCATCATCTGCGTCTGCTGCCCCAGTAATTGATACCTTAGCCCATGGTTACGGTAAAGTATTGGGTAAAGGTAGATTACCACAAGTTCCAGTTATCGTCAAAGCTAGATTTGTTTCCAAATTA…	ATGCCTACTAGATTAACTAAAACCAGAAAACACAGAGGAAACGTTTCTGCCGGTAAGGGTAGAGTTGGTAAACACAGAAAACATCCCGGTGGTAGAGGTAAAGCTGGTGGTGCTCATCATCACAGAACCAATTTAGATAAATACCATCCAGGTTATTTTGGTAAAGTTGGTATGAGATACTTCCACAAACAACAAAACCACTTCTGGAGACCAGAAATCAACTTGGACAAATTATGGACCTTAGTGGACTCAGATAAGAAAGATGAATACTTGCAATCATCATCTGCGTCTGCTGCCCCAGTAATTGATACCTTAGCCCATGGTTACGGTAAAGTATTGGGTAAAGGTAGATTACCACAAGTTCCAGTTATCGTCAAAGCTAGATTTGTTTCCAAATTA…	OK	450	YES	GCT	Other	Other (GCT)
yHMPu5000037871_Candida_trypodendroni_SPADES_g003567.m1	ATGCCTACTAGATTAACTAAAACAAGAAAGCACAGAGGACACGTTTCTGCTGGTCACGGTAGAGTTGGTAAACACAGAAAGCATCCCGGTGGAAGAGGTATGGCTGGTGGTCAACATCACCACAGAACTAATTTGGATAAATACCATCCAGGTTACTTCGGTAAAGTTGGTATGAGATACTTTCACAAACAACAAAACCACTTCTGGAGACCAGAAATCAACTTGGACAAATTATGGACTTTAGTTGAAGAAGAAAAGAAAGAAGAATACTTAAAATCTGCTTCTAAATCTGCTGCCCCTGTTATTGACACTTTGGCCCACGGTTACGGTAAAGTTTTAGGTAAAGGTAAATTACCAGAAGTTCCAGTCATTGTCAAAGCTAGATTTGTTTCCAAATTG…	ATGCCTACTAGATTAACTAAAACAAGAAAGCACAGAGGACACGTTTCTGCTGGTCACGGTAGAGTTGGTAAACACAGAAAGCATCCCGGTGGAAGAGGTATGGCTGGTGGTCAACATCACCACAGAACTAATTTGGATAAATACCATCCAGGTTACTTCGGTAAAGTTGGTATGAGATACTTTCACAAACAACAAAACCACTTCTGGAGACCAGAAATCAACTTGGACAAATTATGGACTTTAGTTGAAGAAGAAAAGAAAGAAGAATACTTAAAATCTGCTTCTAAATCTGCTGCCCCTGTTATTGACACTTTGGCCCACGGTTACGGTAAAGTTTTAGGTAAAGGTAAATTACCAGAAGTTCCAGTCATTGTCAAAGCTAGATTTGTTTCCAAATTG…	OK	450	YES	CAA	Glutamine	Glutamine (CAA)
yHKS699_Yamadazyma_sp_nov_plate33_SPADES_g003308.m1	ATGCCTACTAGATTAACTAAAACAAGAAAGCACAGAGGACACGTTTCTGCTGGTCACGGTAGAGTTGGTAAACACAGAAAGCATCCCGGTGGAAGAGGTATGGCTGGTGGTCAACATCACCACAGAACCAACTTGGATAAATACCATCCAGGTTACTTCGGTAAAGTTGGTATGAGATACTTCCACAAACAACAAAACCACTTCTGGAGACCAGAAATCAACTTGGACAAATTATGGACCTTAGTTGAAGAAGAAAAGAAAGAAGAATACTTAAAATCCGCTTCTAAATCTGCTGCCCCAGTTATCGACACTTTAGCTCACGGTTACGGTAAAGTTTTAGGTAAAGGAAGATTACCAGAAGTTCCAGTCATTGTCAAAGCTAGATTTGTTTCCAAATTA…	ATGCCTACTAGATTAACTAAAACAAGAAAGCACAGAGGACACGTTTCTGCTGGTCACGGTAGAGTTGGTAAACACAGAAAGCATCCCGGTGGAAGAGGTATGGCTGGTGGTCAACATCACCACAGAACCAACTTGGATAAATACCATCCAGGTTACTTCGGTAAAGTTGGTATGAGATACTTCCACAAACAACAAAACCACTTCTGGAGACCAGAAATCAACTTGGACAAATTATGGACCTTAGTTGAAGAAGAAAAGAAAGAAGAATACTTAAAATCCGCTTCTAAATCTGCTGCCCCAGTTATCGACACTTTAGCTCACGGTTACGGTAAAGTTTTAGGTAAAGGAAGATTACCAGAAGTTCCAGTCATTGTCAAAGCTAGATTTGTTTCCAAATTA…	OK	450	YES	CAA	Glutamine	Glutamine (CAA)
yHMPu5000034913_candida_pini_160519.g004337.m1	ATGCCTACTAGATTAACTAAAACAAGAAAACACAGAGGTCACGTTTCTGCCGGTAACGGTCGTGTTGGTAAGCACAGAAAGCATCCCGGTGGACGTGGTATGGCTGGTGGTCAACATCATCACAGAACCAATTTGGATAAATACCATCCAGGTTACTTCGGTAAAGTTGGTATGAGATACTTCCACAAACAACAAAACCACTTCTGGAGACCAGTTATCAATTTAGATAAACTTTGGACTTTAGTTGAAGAAAAAGATTCAAAATTGAAATCTTCTTCCACTGATTCCGCTGTTGTCATTGATACCTTAGCTGGAGGTTACGGTAAAGTTTTAGGAAAAGGTAGATTACCAGATGTTCCAGTCATTGTTAAAGCTAGATACGTTTCCAAATTAGCAGAA…	ATGCCTACTAGATTAACTAAAACAAGAAAACACAGAGGTCACGTTTCTGCCGGTAACGGTCGTGTTGGTAAGCACAGAAAGCATCCCGGTGGACGTGGTATGGCTGGTGGTCAACATCATCACAGAACCAATTTGGATAAATACCATCCAGGTTACTTCGGTAAAGTTGGTATGAGATACTTCCACAAACAACAAAACCACTTCTGGAGACCAGTTATCAATTTAGATAAACTTTGGACTTTAGTTGAAGAAAAAGATTCAAAATTGAAATCTTCTTCCACTGATTCCGCTGTTGTCATTGATACCTTAGCTGGAGGTTACGGTAAAGTTTTAGGAAAAGGTAGATTACCAGATGTTCCAGTCATTGTTAAAGCTAGATACGTTTCCAAATTAGCAGAA…	OK	444	YES	CAA	Glutamine	Glutamine (CAA)
yHMPu5000034657_candida_pseudoglaebosa_170307_g003812.m1	ATGCCTACTAGATTAACGAAAACCAGAAAACATAGAGGTCACGTCTCTGCCGGTAAAGGTAGAGTTGGTAAACATAGAAAAAATCCAGGTGGTAGAGGTATGGCTGGGGGTCAACATCATCACAGAACTAACATGGATAAATACCATCCAGGTTACTTTGGTAAAGTTGGTATGAGATATTTCCACAAACAACAAAATCATTTCTGGAGACCAGAATTAAACTTGGACAAATTATGGTCTTTAGTTGAAGATGAAAAAAGAGATGAATACTTAAAATCTGCTTCTTCATCTGCTGCTCCAGTTATTGATACTTTAGCTCATGGTTACGGTAAAGTTTTAGGTAAAGGTAGATTACCAAACGTCCCAGTCATTGTCAAAGCTAGATTTGTTTCTAAATTA…	ATGCCTACTAGATTAACGAAAACCAGAAAACATAGAGGTCACGTCTCTGCCGGTAAAGGTAGAGTTGGTAAACATAGAAAAAATCCAGGTGGTAGAGGTATGGCTGGGGGTCAACATCATCACAGAACTAACATGGATAAATACCATCCAGGTTACTTTGGTAAAGTTGGTATGAGATATTTCCACAAACAACAAAATCATTTCTGGAGACCAGAATTAAACTTGGACAAATTATGGTCTTTAGTTGAAGATGAAAAAAGAGATGAATACTTAAAATCTGCTTCTTCATCTGCTGCTCCAGTTATTGATACTTTAGCTCATGGTTACGGTAAAGTTTTAGGTAAAGGTAGATTACCAAACGTCCCAGTCATTGTCAAAGCTAGATTTGTTTCTAAATTA…	OK	450	YES	CAA	Glutamine	Glutamine (CAA)
yHMPu5000034656_candida_glaebosa_170307_g005127.m1	ATGCCTACTAGATTAACGAAAACCAGAAAACACAGAGGTCACGTCTCTGCCGGTAAAGGTAGAGTTGGTAAACATAGAAAAAACCCCGGTGGTAGAGGTATGGCTGGGGGTCAACATCATCACAGAACCAACATGGATAAATACCATCCAGGTTACTTTGGTAAAGTTGGTATGAGATACTTCCACAAACAACAAAACCATTTCTGGAGACCAGAATTAAACTTGGACAAATTATGGTCCTTGGTTGAAGATGACAAAAGAGACGAATACTTGAAATCAGCTTCTGCCTCAGCTGCCCCAGTCATCGACACCTTAGCCCACGGTTACGGTAAAGTTTTAGGTAAAGGTAGATTGCCAAACGTACCCGTCATTGTCAAAGCCAGATTCGTCAGTAAATTA…	ATGCCTACTAGATTAACGAAAACCAGAAAACACAGAGGTCACGTCTCTGCCGGTAAAGGTAGAGTTGGTAAACATAGAAAAAACCCCGGTGGTAGAGGTATGGCTGGGGGTCAACATCATCACAGAACCAACATGGATAAATACCATCCAGGTTACTTTGGTAAAGTTGGTATGAGATACTTCCACAAACAACAAAACCATTTCTGGAGACCAGAATTAAACTTGGACAAATTATGGTCCTTGGTTGAAGATGACAAAAGAGACGAATACTTGAAATCAGCTTCTGCCTCAGCTGCCCCAGTCATCGACACCTTAGCCCACGGTTACGGTAAAGTTTTAGGTAAAGGTAGATTGCCAAACGTACCCGTCATTGTCAAAGCCAGATTCGTCAGTAAATTA…	OK	450	YES	CAA	Glutamine	Glutamine (CAA)
yHMPu5000041822_dipodascus_geniculatus_170307_g005544.m1	ATGCCTACTAGATTAACCAAGACTAGAAAGCTTAGAGGACATGTTTCTGCCGGACATGGACGTATTGGCAAGCACAGAAAGCATCCCGGTGGTAGAGGTATGGCTGGTGGTCAACACCATCACCGAACCAACATGGACAAATATCATCCCGGATACTTTGGTAAGGTTGGTATGAGATACTTCCATAAGCAGCAGAATCACTTCTGGAAGCCTGTTCTTAATCTCGACAAGTTGTGGTCTTTGGTTCCTGCTGAGAACAGAGAAAAGTATATCGCCAATGCTTCTGAGTCTTCAGCTCCTGTTATTGATACTTTGGCTGCTGGATACGGTAAGGTTCTTGGTAAGGGACGTCTTCCTGATGTTCCTGTTATTGTTAAGGCCAGATTTGTTTCTGCTCTT…	ATGCCTACTAGATTAACCAAGACTAGAAAGCTTAGAGGACATGTTTCTGCCGGACATGGACGTATTGGCAAGCACAGAAAGCATCCCGGTGGTAGAGGTATGGCTGGTGGTCAACACCATCACCGAACCAACATGGACAAATATCATCCCGGATACTTTGGTAAGGTTGGTATGAGATACTTCCATAAGCAGCAGAATCACTTCTGGAAGCCTGTTCTTAATCTCGACAAGTTGTGGTCTTTGGTTCCTGCTGAGAACAGAGAAAAGTATATCGCCAATGCTTCTGAGTCTTCAGCTCCTGTTATTGATACTTTGGCTGCTGGATACGGTAAGGTTCTTGGTAAGGGACGTCTTCCTGATGTTCCTGTTATTGTTAAGGCCAGATTTGTTTCTGCTCTT…	OK	450	YES	CAA	Glutamine	Glutamine (CAA)
yHMPu5000034664_kodamaea_anthophila_190924_g005078.m1	ATGCCTACTAGATTAACCAAGACCAGAAAGCACAGAGGTCACGTTTCTGCCGGTAAGGGTAGAGTCGGCAAGCACAGAAAGCATCCAGGTGGTCGTGGTAAGGCCGGTGGTCAGCACCACCACAGAACCAACATGGACAAGTACCACCCAGGTTACTTTGGTAAGGTTGGTATGAGATACTTCCACAAGCAGGGCAACCACTTCTGGAGACCAGAGATCAACTTGGACAAGTTGTGGACCTTGGTCGACTCCGACAAGAAGGAGGAGTACTTGAAGTCTGCTTCCGCCTCTGCTGCCCCAGTCATCGACACCTTGGCCCACGGCTACGGTAAGGTCTTGGGTAAGGGTCAGTTGCCACAGGTTCCAGTCATTGTCAAGGCCAGATTTGTTTCCAAGTTG…	ATGCCTACTAGATTAACCAAGACCAGAAAGCACAGAGGTCACGTTTCTGCCGGTAAGGGTAGAGTCGGCAAGCACAGAAAGCATCCAGGTGGTCGTGGTAAGGCCGGTGGTCAGCACCACCACAGAACCAACATGGACAAGTACCACCCAGGTTACTTTGGTAAGGTTGGTATGAGATACTTCCACAAGCAGGGCAACCACTTCTGGAGACCAGAGATCAACTTGGACAAGTTGTGGACCTTGGTCGACTCCGACAAGAAGGAGGAGTACTTGAAGTCTGCTTCCGCCTCTGCTGCCCCAGTCATCGACACCTTGGCCCACGGCTACGGTAAGGTCTTGGGTAAGGGTCAGTTGCCACAGGTTCCAGTCATTGTCAAGGCCAGATTTGTTTCCAAGTTG…	OK	450	YES	CAG	Glutamine	Glutamine (CAG)
yHMPu5000035043_babjeviella_inositovora_180604.g002008.m1	ATGCCTACTAGATTAACCAAGACCAGAAAGCACAGAGGTCACGTTTCCGCCGGTAAGGGTCGTGTTGGTAAGCACAGAAAGCATCCAGGTGGTCGTGGTAAGGCCGGTGGTCAGCACCATCACAGAATCAACATGGACAAGTACCACCCTGGTTACTTCGGTAAGGTTGGTATGAGATACTTCCACAAGCAGCAGAACCACTTCTGGAAGCCAGTCTTGAACTTGGACAAGTTGTGGACTTTGGTCCCAGAGCAGAAGAGAGATGAGTACTTGTCTTCCGCTTCTGCTGCTTCTGCCCCAGTTATTGACACCTTGGCCCACGGTTACGGTAAGGTTTTGGGTAAGGGTCGTTTGCCACAGGTTCCAGTTATTGTCAAGGCTAGATTCGTCTCCAAGTTG…	ATGCCTACTAGATTAACCAAGACCAGAAAGCACAGAGGTCACGTTTCCGCCGGTAAGGGTCGTGTTGGTAAGCACAGAAAGCATCCAGGTGGTCGTGGTAAGGCCGGTGGTCAGCACCATCACAGAATCAACATGGACAAGTACCACCCTGGTTACTTCGGTAAGGTTGGTATGAGATACTTCCACAAGCAGCAGAACCACTTCTGGAAGCCAGTCTTGAACTTGGACAAGTTGTGGACTTTGGTCCCAGAGCAGAAGAGAGATGAGTACTTGTCTTCCGCTTCTGCTGCTTCTGCCCCAGTTATTGACACCTTGGCCCACGGTTACGGTAAGGTTTTGGGTAAGGGTCGTTTGCCACAGGTTCCAGTTATTGTCAAGGCTAGATTCGTCTCCAAGTTG…	OK	450	YES	CAG	Glutamine	Glutamine (CAG)
yHMPu5000034903_ogataea_naganishii_160519.g002129.m1	ATGCCTACTAGATTAACCAAGACCAGAAAGCACAGAGGTCACGTTTCCGCCGGTAACGGTCGTGTCGGTAAGCACAGAAAGCATCCCGGTGGTAGAGGTATGGCCGGTGGTCAGCACCACCACAGAACCAACTTGGACAAGTACCACCCAGGTTACTTCGGTAAGGTTGGTATGAGATACTTCCACAAGCAGCAGGGTCACTTCTGGAAGCCAGTGATCAACCTCGACAAGCTGTGGTCTCTGGTTGAGAACAAGGACGAGAAGATTGCCAAGTCCTCCACTGACTCCGCCATTGTCATTGACACCCTGGCTTCCGGTTACGGTAAGGTTCTCGGCAAGGGAAGACTTCCTCAGGTGCCTGTGATTGTCAAGGCCAGATACGTTTCCAAGTTAGCCGAG…	ATGCCTACTAGATTAACCAAGACCAGAAAGCACAGAGGTCACGTTTCCGCCGGTAACGGTCGTGTCGGTAAGCACAGAAAGCATCCCGGTGGTAGAGGTATGGCCGGTGGTCAGCACCACCACAGAACCAACTTGGACAAGTACCACCCAGGTTACTTCGGTAAGGTTGGTATGAGATACTTCCACAAGCAGCAGGGTCACTTCTGGAAGCCAGTGATCAACCTCGACAAGCTGTGGTCTCTGGTTGAGAACAAGGACGAGAAGATTGCCAAGTCCTCCACTGACTCCGCCATTGTCATTGACACCCTGGCTTCCGGTTACGGTAAGGTTCTCGGCAAGGGAAGACTTCCTCAGGTGCCTGTGATTGTCAAGGCCAGATACGTTTCCAAGTTAGCCGAG…	OK	444	YES	CAG	Glutamine	Glutamine (CAG)
yHMPu5000035005_lodderomyces_elongisporus_160519.haplomerger2_g002018.m1	ATGCCTACTAGATTAACCAAGACCAGAAAGCACAGAGGACACGTTTCTGCCGGTAAGGGTAGAGTTGGTAAGCACAGAAAGCATCCAGGTGGTAGAGGTAAGGCTGGTGGTCAACACCACCACAGAACCAACTTGGATAAATACCATCCAGGTTACTTCGGTAAAGTTGGTATGAGATACTTCCACAAACAACAAAACCACTTCTGGAGACCAGAAATCAACTTGGACAAATTATGGACTTTGGTTGAGAGTGATAAGAAAGATGAGTACTTGAAGACTGCTTCAGCTTCAGCTGCTCCAGTCATTGACACATTGGCTGCCGGTTACGGTAAAGTTTTGGGTAAAGGTAGATTGCCACAAGTTCCAGTTATCGTCAAGGCCAGATTTGTTTCTAAATTG…	ATGCCTACTAGATTAACCAAGACCAGAAAGCACAGAGGACACGTTTCTGCCGGTAAGGGTAGAGTTGGTAAGCACAGAAAGCATCCAGGTGGTAGAGGTAAGGCTGGTGGTCAACACCACCACAGAACCAACTTGGATAAATACCATCCAGGTTACTTCGGTAAAGTTGGTATGAGATACTTCCACAAACAACAAAACCACTTCTGGAGACCAGAAATCAACTTGGACAAATTATGGACTTTGGTTGAGAGTGATAAGAAAGATGAGTACTTGAAGACTGCTTCAGCTTCAGCTGCTCCAGTCATTGACACATTGGCTGCCGGTTACGGTAAAGTTTTGGGTAAAGGTAGATTGCCACAAGTTCCAGTTATCGTCAAGGCCAGATTTGTTTCTAAATTG…	OK	450	YES	CAA	Glutamine	Glutamine (CAA)
yHMPu5000041849_candida_morakotiae_180604_g004895.m1	ATGCCTACTAGATTAACCAAGACCAGAAAACATAGAGGTAACGTTTCTGCCGGTAAAGGTAGAGTCGGTAAACATAGAAAACATCCAGGTGGTAGAGGTAAAGCTGGTGGTCAACATCATCACAGAACCAATTTAGATAAATACCATCCAGGTTATTTTGGTAAAGTTGGTATGAGATATTTCAGAAAACAACAAATTCATTTTTGGAGACCAGAAATTAATCTTGATAAATTATGGACTTTAGTTGAAAGTGATAAAAAAGAAGAATATTTAAAATCATCAAATAAAACTGCTGCTCCAGTTATTGATACTTTAGCTCATGGTTATGGTAAAGTTTTAGGTAAAGGTAGATTACCAGAAGTTCCAGTTATTGTTAAAGCTAGATTTGTTTCAAAATTA…	ATGCCTACTAGATTAACCAAGACCAGAAAACATAGAGGTAACGTTTCTGCCGGTAAAGGTAGAGTCGGTAAACATAGAAAACATCCAGGTGGTAGAGGTAAAGCTGGTGGTCAACATCATCACAGAACCAATTTAGATAAATACCATCCAGGTTATTTTGGTAAAGTTGGTATGAGATATTTCAGAAAACAACAAATTCATTTTTGGAGACCAGAAATTAATCTTGATAAATTATGGACTTTAGTTGAAAGTGATAAAAAAGAAGAATATTTAAAATCATCAAATAAAACTGCTGCTCCAGTTATTGATACTTTAGCTCATGGTTATGGTAAAGTTTTAGGTAAAGGTAGATTACCAGAAGTTCCAGTTATTGTTAAAGCTAGATTTGTTTCAAAATTA…	OK	450	YES	CAA	Glutamine	Glutamine (CAA)
yHMPu5000034990_Candida_corydali_SPADES_g001390.m1	ATGCCTACTAGATTAACCAAGACCAGAAAACATAGAGGTAACGTTTCTGCCGGTAAAGGTAGAGTCGGTAAACACAGAAAACATCCCGGTGGTAGAGGTAAAGCTGGTGGTCAACATCATCACAGAACCAATTTGGATAAATACCATCCAGGTTATTTCGGTAAAGTTGGTATGAGATACTTTAGAAAACAACAAATCCACTTTTGGAGACCAGAAATCAACCTTGACAAATTGTGGACTTTAGTTGAAAGTGATAAAAAAGACGAATATTTAAAATCATCAAACCAAACCGCTGCCCCAGTTATTGACACTTTAGCTCATGGATACGGTAAAGTTTTAGGTAAAGGTAGATTACCAGAAGTTCCAGTCATTGTCAAAGCTAGATTTGTTTCTAAATTA…	ATGCCTACTAGATTAACCAAGACCAGAAAACATAGAGGTAACGTTTCTGCCGGTAAAGGTAGAGTCGGTAAACACAGAAAACATCCCGGTGGTAGAGGTAAAGCTGGTGGTCAACATCATCACAGAACCAATTTGGATAAATACCATCCAGGTTATTTCGGTAAAGTTGGTATGAGATACTTTAGAAAACAACAAATCCACTTTTGGAGACCAGAAATCAACCTTGACAAATTGTGGACTTTAGTTGAAAGTGATAAAAAAGACGAATATTTAAAATCATCAAACCAAACCGCTGCCCCAGTTATTGACACTTTAGCTCATGGATACGGTAAAGTTTTAGGTAAAGGTAGATTACCAGAAGTTCCAGTCATTGTCAAAGCTAGATTTGTTTCTAAATTA…	OK	450	YES	CAA	Glutamine	Glutamine (CAA)
yHMPu5000037211_candida_parablackwelliae_210210_g001676.m1	ATGCCTACTAGATTAACCAAGACCAGAAAACACAGAGGTAACGTTTCTGCCGGTAAGGGTAGAGTCGGTAAGCACAGAAAGCATCCAGGTGGTAGAGGTAAGGCTGGTGGTCAACATCACCACAGAACCAACTTGGACAAGTACCATCCAGGTTACTTCGGTAAGGTTGGTATGAGATACTTCCACAAGCAACAAAACCACTTCTGGAGACCAGAGATCAACTTGGACAAATTATGGACCTTGGTTGAAGAAGACAAGAAGGACGAATACTTGAAGACCGCTTCCGCTTCTGCTGCCCCAGTCATTGACACCTTGGCTCACGGCTACGGTAAGGTTTTGGGTAAGGGTAGATTGCCACAAGTTCCAATCATTGTCAAGGCCAGATTTGTTTCCAAGTTG…	ATGCCTACTAGATTAACCAAGACCAGAAAACACAGAGGTAACGTTTCTGCCGGTAAGGGTAGAGTCGGTAAGCACAGAAAGCATCCAGGTGGTAGAGGTAAGGCTGGTGGTCAACATCACCACAGAACCAACTTGGACAAGTACCATCCAGGTTACTTCGGTAAGGTTGGTATGAGATACTTCCACAAGCAACAAAACCACTTCTGGAGACCAGAGATCAACTTGGACAAATTATGGACCTTGGTTGAAGAAGACAAGAAGGACGAATACTTGAAGACCGCTTCCGCTTCTGCTGCCCCAGTCATTGACACCTTGGCTCACGGCTACGGTAAGGTTTTGGGTAAGGGTAGATTGCCACAAGTTCCAATCATTGTCAAGGCCAGATTTGTTTCCAAGTTG…	OK	450	YES	CAA	Glutamine	Glutamine (CAA)
yHMPu5000038407_candida_blackwelliae_190924.haplomerger2_g000870.m1	ATGCCTACTAGATTAACCAAGACCAGAAAACACAGAGGTAACGTTTCTGCCGGTAAGGGTAGAGTCGGTAAGCACAGAAAGCATCCAGGTGGTAGAGGTAAGGCTGGTGGTCAACACCACCACAGAACCAACTTGGACAAGTACCATCCAGGTTACTTTGGTAAGGTTGGTATGAGATACTTCCACAAGCAACAAAACCACTTCTGGAGACCAGAAATCAACTTGGACAAATTATGGACCTTGGTTGATGAAGACAAGAAGGACGAATACTTGAAGACCGCTTCCGCTTCCGCTGCTCCAGTCATTGACACCTTAGCTCACGGTTACGGTAAGGTTTTGGGTAAGGGTAGATTGCCACAAGTTCCAATCATTGTCAAGGCCAGATTTGTTTCCAAGTTG…	ATGCCTACTAGATTAACCAAGACCAGAAAACACAGAGGTAACGTTTCTGCCGGTAAGGGTAGAGTCGGTAAGCACAGAAAGCATCCAGGTGGTAGAGGTAAGGCTGGTGGTCAACACCACCACAGAACCAACTTGGACAAGTACCATCCAGGTTACTTTGGTAAGGTTGGTATGAGATACTTCCACAAGCAACAAAACCACTTCTGGAGACCAGAAATCAACTTGGACAAATTATGGACCTTGGTTGATGAAGACAAGAAGGACGAATACTTGAAGACCGCTTCCGCTTCCGCTGCTCCAGTCATTGACACCTTAGCTCACGGTTACGGTAAGGTTTTGGGTAAGGGTAGATTGCCACAAGTTCCAATCATTGTCAAGGCCAGATTTGTTTCCAAGTTG…	OK	450	YES	CAA	Glutamine	Glutamine (CAA)
candida_parapsilosis_g002104.m1	ATGCCTACTAGATTAACCAAGACCAGAAAACACAGAGGAAATGTTTCTGCCGGTAAGGGTAGAATTGGTAAGCACAGAAAGCATCCCGGTGGTAGAGGTATGGCTGGTGGTCAACACCACCACAGAACTAACTTGGATAAATACCATCCAGGTTACTTTGGTAAGGTTGGTATGAGATACTTTCACAAACAACAAAACCACTTCTGGAGACCAGAAATCAACTTGGACAAATTATGGACTTTGGTTGACTCTGAAAAGAAAGACGAATACTTGAAGAGCTCTTCTAAATCAGTCGCTCCAGTTATTGACACCTTAGCTCACGGTTACGGTAAAGTTTTGGGTAAAGGTAGATTACCAGAAGTTCCAGTCATTGTCAAGGCTAGATTTGTTTCCAAATTG…	ATGCCTACTAGATTAACCAAGACCAGAAAACACAGAGGAAATGTTTCTGCCGGTAAGGGTAGAATTGGTAAGCACAGAAAGCATCCCGGTGGTAGAGGTATGGCTGGTGGTCAACACCACCACAGAACTAACTTGGATAAATACCATCCAGGTTACTTTGGTAAGGTTGGTATGAGATACTTTCACAAACAACAAAACCACTTCTGGAGACCAGAAATCAACTTGGACAAATTATGGACTTTGGTTGACTCTGAAAAGAAAGACGAATACTTGAAGAGCTCTTCTAAATCAGTCGCTCCAGTTATTGACACCTTAGCTCACGGTTACGGTAAAGTTTTGGGTAAAGGTAGATTACCAGAAGTTCCAGTCATTGTCAAGGCTAGATTTGTTTCCAAATTG…	OK	450	YES	CAA	Glutamine	Glutamine (CAA)
yHMPu5000034995_candida_parapsilosis_170307_g002075.m1	ATGCCTACTAGATTAACCAAGACCAGAAAACACAGAGGAAATGTTTCTGCCGGTAAGGGTAGAATTGGTAAGCACAGAAAGCATCCCGGTGGTAGAGGTATGGCTGGTGGTCAACACCACCACAGAACTAACTTGGATAAATACCATCCAGGTTACTTTGGTAAGGTTGGTATGAGATACTTTCACAAACAACAAAACCACTTCTGGAGACCAGAAATCAACTTGGACAAATTATGGACTTTGGTTGACTCTGAAAAGAAAGACGAATACTTGAAGAGCTCTTCTAAATCAGCCGCTCCAGTTATTGACACCTTAGCTCACGGTTACGGTAAAGTTTTGGGTAAAGGTAGATTACCAGAAGTTCCAGTCATTGTCAAGGCTAGATTTGTTTCCAAATTG…	ATGCCTACTAGATTAACCAAGACCAGAAAACACAGAGGAAATGTTTCTGCCGGTAAGGGTAGAATTGGTAAGCACAGAAAGCATCCCGGTGGTAGAGGTATGGCTGGTGGTCAACACCACCACAGAACTAACTTGGATAAATACCATCCAGGTTACTTTGGTAAGGTTGGTATGAGATACTTTCACAAACAACAAAACCACTTCTGGAGACCAGAAATCAACTTGGACAAATTATGGACTTTGGTTGACTCTGAAAAGAAAGACGAATACTTGAAGAGCTCTTCTAAATCAGCCGCTCCAGTTATTGACACCTTAGCTCACGGTTACGGTAAAGTTTTGGGTAAAGGTAGATTACCAGAAGTTCCAGTCATTGTCAAGGCTAGATTTGTTTCCAAATTG…	OK	450	YES	CAA	Glutamine	Glutamine (CAA)
candida_orthopsilosis_g000250.m1	ATGCCTACTAGATTAACCAAGACCAGAAAACACAGAGGAAATGTTTCTGCCGGTAAGGGTAGAATTGGTAAACACAGAAAGCATCCCGGTGGTAGAGGTATGGCTGGTGGTCAACACCATCACAGAACTAACTTGGATAAATACCACCCAGGTTACTTCGGTAAGGTTGGTATGAGATACTTCCACAAACAACAAAACCACTTCTGGAGACCAGAGATCAACTTGGAAAAATTATGGACCTTGGTTGACTCTGAAAAGAAGGACGAATACTTGAAGAGTTCATCAAAATCAGCTGCTCCTGTCATTGACACATTGGCTCACGGTTACGGTAAAGTTTTGGGTAAAGGTAGATTACCAGAAGTTCCAGTCATTGTTAAGGCCAGATTTGTTTCTAAATTG…	ATGCCTACTAGATTAACCAAGACCAGAAAACACAGAGGAAATGTTTCTGCCGGTAAGGGTAGAATTGGTAAACACAGAAAGCATCCCGGTGGTAGAGGTATGGCTGGTGGTCAACACCATCACAGAACTAACTTGGATAAATACCACCCAGGTTACTTCGGTAAGGTTGGTATGAGATACTTCCACAAACAACAAAACCACTTCTGGAGACCAGAGATCAACTTGGAAAAATTATGGACCTTGGTTGACTCTGAAAAGAAGGACGAATACTTGAAGAGTTCATCAAAATCAGCTGCTCCTGTCATTGACACATTGGCTCACGGTTACGGTAAAGTTTTGGGTAAAGGTAGATTACCAGAAGTTCCAGTCATTGTTAAGGCCAGATTTGTTTCTAAATTG…	OK	450	YES	CAA	Glutamine	Glutamine (CAA)
yHMPu5000035717_candida_orthopsilosis_180604.haplomerger2_g001415.m1	ATGCCTACTAGATTAACCAAGACCAGAAAACACAGAGGAAATGTTTCTGCCGGTAAGGGTAGAATTGGTAAACACAGAAAGCATCCCGGTGGTAGAGGTATGGCTGGTGGTCAACACCATCACAGAACTAACTTGGATAAATACCACCCAGGTTACTTCGGTAAGGTTGGTATGAGATACTTCCACAAACAACAAAACCACTTCTGGAGACCAGAAATCAACTTGGACAAATTATGGACCTTGGTTGACTCTGAAAAGAAGGATGAATACTTGAAGAGTTCATCAAAATCAGCTGCTCCTGTCATTGACACATTGGCTCACGGTTACGGTAAAGTTTTGGGTAAAGGTAGATTACCAGAAGTTCCAGTCATTGTTAAGGCCAGATTTGTTTCTAAATTG…	ATGCCTACTAGATTAACCAAGACCAGAAAACACAGAGGAAATGTTTCTGCCGGTAAGGGTAGAATTGGTAAACACAGAAAGCATCCCGGTGGTAGAGGTATGGCTGGTGGTCAACACCATCACAGAACTAACTTGGATAAATACCACCCAGGTTACTTCGGTAAGGTTGGTATGAGATACTTCCACAAACAACAAAACCACTTCTGGAGACCAGAAATCAACTTGGACAAATTATGGACCTTGGTTGACTCTGAAAAGAAGGATGAATACTTGAAGAGTTCATCAAAATCAGCTGCTCCTGTCATTGACACATTGGCTCACGGTTACGGTAAAGTTTTGGGTAAAGGTAGATTACCAGAAGTTCCAGTCATTGTTAAGGCCAGATTTGTTTCTAAATTG…	OK	450	YES	CAA	Glutamine	Glutamine (CAA)
yHMPu5000037240_candida_sp_210210_g000778.m1	ATGCCTACTAGATTAACCAAGACCAGAAAACACAGAGGAAATGTTTCTGCCGGTAAGGGTAGAATTGGTAAACACAGAAAGCATCCCGGTGGTAGAGGTATGGCTGGTGGTCAACACCATCACAGAACCAACTTGGATAAATACCATCCAGGTTACTTCGGTAAAGTTGGTATGAGATACTTCCACAAGCAACAAAACCACTTCTGGAGACCAGAAATCAACTTGGACAAATTGTGGACCTTGATTGATTCTGAAAAGAAGGACGAATACTTGAAGAGTTCTTCAAAGTCAGCTGCTCCAGTTATTGACACCTTGGCTCACGGTTACGGTAAAGTTTTGGGTAAAGGTAGATTACCAGAAGTTCCAGTCATTGTCAAGGCTAGATTTGTTTCTAAATTG…	ATGCCTACTAGATTAACCAAGACCAGAAAACACAGAGGAAATGTTTCTGCCGGTAAGGGTAGAATTGGTAAACACAGAAAGCATCCCGGTGGTAGAGGTATGGCTGGTGGTCAACACCATCACAGAACCAACTTGGATAAATACCATCCAGGTTACTTCGGTAAAGTTGGTATGAGATACTTCCACAAGCAACAAAACCACTTCTGGAGACCAGAAATCAACTTGGACAAATTGTGGACCTTGATTGATTCTGAAAAGAAGGACGAATACTTGAAGAGTTCTTCAAAGTCAGCTGCTCCAGTTATTGACACCTTGGCTCACGGTTACGGTAAAGTTTTGGGTAAAGGTAGATTACCAGAAGTTCCAGTCATTGTCAAGGCTAGATTTGTTTCTAAATTG…	OK	450	YES	CAA	Glutamine	Glutamine (CAA)
yHMPu5000034993_candida_metapsilosis_170307.haplomerger2_g003701.m1	ATGCCTACTAGATTAACCAAGACCAGAAAACACAGAGGAAATGTTTCTGCCGGTAAGGGTAGAATTGGTAAACACAGAAAGCATCCCGGTGGTAGAGGTATGGCTGGTGGTCAACACCATCACAGAACCAACTTGGATAAATACCATCCAGGTTACTTCGGTAAAGTTGGTATGAGATACTTCCACAAACAAAGAAACCATTTCTGGAGACCAGAAATCAACTTGGAAAAATTATGGACCTTGGTTGACTCTGAAAAGAAGGATGAATACTTGAAGAGCTCTTCAAAATCAGCTGCTCCAGTTATTGACACCTTGGCCCACGGTTACGGTAAGGTTTTGGGTAAAGGTAGATTACCAGAAGTTCCAGTCATTGTCAAGGCTAGATTTGTTTCTAAATTG…	ATGCCTACTAGATTAACCAAGACCAGAAAACACAGAGGAAATGTTTCTGCCGGTAAGGGTAGAATTGGTAAACACAGAAAGCATCCCGGTGGTAGAGGTATGGCTGGTGGTCAACACCATCACAGAACCAACTTGGATAAATACCATCCAGGTTACTTCGGTAAAGTTGGTATGAGATACTTCCACAAACAAAGAAACCATTTCTGGAGACCAGAAATCAACTTGGAAAAATTATGGACCTTGGTTGACTCTGAAAAGAAGGATGAATACTTGAAGAGCTCTTCAAAATCAGCTGCTCCAGTTATTGACACCTTGGCCCACGGTTACGGTAAGGTTTTGGGTAAAGGTAGATTACCAGAAGTTCCAGTCATTGTCAAGGCTAGATTTGTTTCTAAATTG…	OK	450	YES	CAA	Glutamine	Glutamine (CAA)
yHMPu5000038357_candida_theae_180604.haplomerger2_g004024.m1	ATGCCTACTAGATTAACCAAGACCAGAAAACACAGAGGAAATGTTTCTGCCGGTAAGGGTAGAATTGGTAAACACAGAAAGCATCCCGGTGGTAGAGGTATGGCTGGTGGTCAACACCACCACAGAACCAACTTGGATAAATACCATCCAGGTTACTTCGGTAAAGTTGGTATGAGATACTTCCACAAACAACAAAACCACTTTTGGAGACCAGAAATCAACTTGGACAAATTGTGGACCTTGGTTGACTCTGAAAAGAAGGATGAATACTTGAAGAGCTCTTCAAAATCAGCTGCTCCAGTCATTGACACCTTGGCCCACGGTTACGGTAAAGTTTTGGGTAAAGGTAGATTGCCAGAAGTTCCAGTCATTGTCAAGGCTAGATTTGTTTCCAAATTG…	ATGCCTACTAGATTAACCAAGACCAGAAAACACAGAGGAAATGTTTCTGCCGGTAAGGGTAGAATTGGTAAACACAGAAAGCATCCCGGTGGTAGAGGTATGGCTGGTGGTCAACACCACCACAGAACCAACTTGGATAAATACCATCCAGGTTACTTCGGTAAAGTTGGTATGAGATACTTCCACAAACAACAAAACCACTTTTGGAGACCAGAAATCAACTTGGACAAATTGTGGACCTTGGTTGACTCTGAAAAGAAGGATGAATACTTGAAGAGCTCTTCAAAATCAGCTGCTCCAGTCATTGACACCTTGGCCCACGGTTACGGTAAAGTTTTGGGTAAAGGTAGATTGCCAGAAGTTCCAGTCATTGTCAAGGCTAGATTTGTTTCCAAATTG…	OK	450	YES	CAA	Glutamine	Glutamine (CAA)
scheffersomyces_stambukii_g002547.m1	ATGCCTACTAGATTAACCAAGACCAGAAAACACAGAGGAAACGTTTCCGCCGGTAAGGGTAGGATCGGTAAGCACAGAAAGCACCCCGGTGGTAGAGGTAAGGCTGGTGGTCAACACCACCACAGAACCAACATGGACAAGTACCACCCTGGTTACTTCGGTAAGGTTGGTATGAGATACTTCCACAAGCAACAAGGTCACTTCTGGAGACCAGAGATCAACTTGGACAAGTTGTGGACCTTGGTTGAAGAAGACAAGAAGGATGAGTACCTCAAGTCTGCATCCCAATCCGCTGCCCCTGTCATTGACACCTTGGCCCACGGTTACGGTAAGGTGTTGGGTAAGGGTAGATTGCCCCAAGTTCCTGTCATTGTCAAGGCCAGATTTGTCTCCAAATTG…	ATGCCTACTAGATTAACCAAGACCAGAAAACACAGAGGAAACGTTTCCGCCGGTAAGGGTAGGATCGGTAAGCACAGAAAGCACCCCGGTGGTAGAGGTAAGGCTGGTGGTCAACACCACCACAGAACCAACATGGACAAGTACCACCCTGGTTACTTCGGTAAGGTTGGTATGAGATACTTCCACAAGCAACAAGGTCACTTCTGGAGACCAGAGATCAACTTGGACAAGTTGTGGACCTTGGTTGAAGAAGACAAGAAGGATGAGTACCTCAAGTCTGCATCCCAATCCGCTGCCCCTGTCATTGACACCTTGGCCCACGGTTACGGTAAGGTGTTGGGTAAGGGTAGATTGCCCCAAGTTCCTGTCATTGTCAAGGCCAGATTTGTCTCCAAATTG…	OK	450	YES	CAA	Glutamine	Glutamine (CAA)
yHMPu5000035720_candida_chilensis_160613.g004596.m1	ATGCCTACTAGATTAACCAAAACCAGAAAGCACAGAGGTCACGTCTCAGCCGGTAACGGTCGTGTTGGTAAGCACAGAAAGCATCCAGGTGGTAGAGGTATGGCCGGTGGTATGCACCACCACAGAACCAACTTAGATAAATACCATCCAGGTTATTTCGGTAAGGTTGGTATGAGATACTTCCACAAGCAACAAAACCATTTCTGGAAGCCAGTCTTAAACTTAGATAAATTATGGACTTTAGTTCCAGAAGACAAGAGAGACGAGTACTTAAAGTCTGCCTCTGCTTCTTCTGCTCCAGTCATTGACACCTTAGCCCACGGTTACGGTAAGGTCTTAGGTAAGGGTAGATTACCAGATGTCCCAGTCATTGTCAAGGCCAGATTTGTTTCCAAATTA…	ATGCCTACTAGATTAACCAAAACCAGAAAGCACAGAGGTCACGTCTCAGCCGGTAACGGTCGTGTTGGTAAGCACAGAAAGCATCCAGGTGGTAGAGGTATGGCCGGTGGTATGCACCACCACAGAACCAACTTAGATAAATACCATCCAGGTTATTTCGGTAAGGTTGGTATGAGATACTTCCACAAGCAACAAAACCATTTCTGGAAGCCAGTCTTAAACTTAGATAAATTATGGACTTTAGTTCCAGAAGACAAGAGAGACGAGTACTTAAAGTCTGCCTCTGCTTCTTCTGCTCCAGTCATTGACACCTTAGCCCACGGTTACGGTAAGGTCTTAGGTAAGGGTAGATTACCAGATGTCCCAGTCATTGTCAAGGCCAGATTTGTTTCCAAATTA…	OK	450	YES	ATG	Methionine	Methionine (ATG)
yHMPu5000034932_kuraishia_ogatae_160519.g002913.m1	ATGCCTACTAGATTAACCAAAACCAGAAAGCACAGAGGTAACGTTTCCGCCGGTAAGGGTCGTGTTGGTAAGCACAGAAAGCATCCCGGTGGTCGTGGTATGGCCGGTGGTATGCACCACCACAGAACCAACCTCGACAAGTACCACCCTGGTTACTTTGGTAAGGTCGGTATGAGATACTTCCACAAGCAGCAAGCTCACTTCTGGAAGCCAGTTCTCAACCTCGACAAGCTCTGGACTCTTGTCCCAGAGGAGTCCAGAGATGAGCTCCTCAAGTCCTCCTCCGCTTCTGCTGCTGTTGTTATTGACACTCTTGCCAGCGGTTACGGCAAGGTGCTCGGTAAGGGTAGACTCCCAGAGGTTCCAGTCATCGTCAAGGCCAGATATGTCTCTAAGTTG…	ATGCCTACTAGATTAACCAAAACCAGAAAGCACAGAGGTAACGTTTCCGCCGGTAAGGGTCGTGTTGGTAAGCACAGAAAGCATCCCGGTGGTCGTGGTATGGCCGGTGGTATGCACCACCACAGAACCAACCTCGACAAGTACCACCCTGGTTACTTTGGTAAGGTCGGTATGAGATACTTCCACAAGCAGCAAGCTCACTTCTGGAAGCCAGTTCTCAACCTCGACAAGCTCTGGACTCTTGTCCCAGAGGAGTCCAGAGATGAGCTCCTCAAGTCCTCCTCCGCTTCTGCTGCTGTTGTTATTGACACTCTTGCCAGCGGTTACGGCAAGGTGCTCGGTAAGGGTAGACTCCCAGAGGTTCCAGTCATCGTCAAGGCCAGATATGTCTCTAAGTTG…	OK	450	YES	ATG	Methionine	Methionine (ATG)
yHMPu5000037253_nematodospora_anomalae_210210_g000945.m1	ATGCCTACTAGATTAACCAAAACCAGAAAACATAGAGGACACGTTTCTGCCGGTAAGGGTAGAATTGGTAAACACAGAAAAAACCCTGGTGGTAGAGGTAAAGCTGGTGGTCAACATCATCACAGAACCAACTTGGATAAATTCCACCCAGGTTACTTTGGTAAAGTTGGTATGAGATATTTCCATAAACAACAAAACCACTTCTGGAGACCAGAAATCAACTTGGACAAATTATGGACTTTAGTTGAATCAGACAAAAAAGAAGAATACTTGAAATCCGCTTCATCCTCAGCTGCTCCAGTCATTGATACTTTAGCTCATGGTTACGGTAAAGTTTTGGGTAAAGGTAGATTACCTCAAGTTCCAGTCATTGTTAAAGCTAGATTTGTTTCCAAATTA…	ATGCCTACTAGATTAACCAAAACCAGAAAACATAGAGGACACGTTTCTGCCGGTAAGGGTAGAATTGGTAAACACAGAAAAAACCCTGGTGGTAGAGGTAAAGCTGGTGGTCAACATCATCACAGAACCAACTTGGATAAATTCCACCCAGGTTACTTTGGTAAAGTTGGTATGAGATATTTCCATAAACAACAAAACCACTTCTGGAGACCAGAAATCAACTTGGACAAATTATGGACTTTAGTTGAATCAGACAAAAAAGAAGAATACTTGAAATCCGCTTCATCCTCAGCTGCTCCAGTCATTGATACTTTAGCTCATGGTTACGGTAAAGTTTTGGGTAAAGGTAGATTACCTCAAGTTCCAGTCATTGTTAAAGCTAGATTTGTTTCCAAATTA…	OK	450	YES	CAA	Glutamine	Glutamine (CAA)
yHQL182_Saccharomycopsis_sp_nov_plate33_SPADES.g005155.m1	ATGCCTACTAGATTAACCAAAACCAGAAAACACAGAGGTCACGTCTCAGCCGGTAAGGGTCGTATCGGTAAACACAGAAAGCATCCTGGTGGTCGTGGTAAAGCCGGTGGTCAACACCACCACCGTATTAACATGGATAAATACCATCCTGGTTACTTCGGTAAAGTTGGTATGAGATACTTCCACAAACAACAAAACCACTTCTGGAAACCAGTCTTGAACTTGGACAAGTTGTGGACTTTGGTTCCTGAAGAAAAGAGAGAATCTTACATTAAATCGGCATCTGAAAGCGCTGCTCCAGTCATCGACACTTTGGCTGCTGGTTACGGTAAGGTCTTAGGTAAAGGTAGATTGCCACAAGTTCCTGTTGTTGTCAAGGCCAGATTTGTTTCCAAATTG…	ATGCCTACTAGATTAACCAAAACCAGAAAACACAGAGGTCACGTCTCAGCCGGTAAGGGTCGTATCGGTAAACACAGAAAGCATCCTGGTGGTCGTGGTAAAGCCGGTGGTCAACACCACCACCGTATTAACATGGATAAATACCATCCTGGTTACTTCGGTAAAGTTGGTATGAGATACTTCCACAAACAACAAAACCACTTCTGGAAACCAGTCTTGAACTTGGACAAGTTGTGGACTTTGGTTCCTGAAGAAAAGAGAGAATCTTACATTAAATCGGCATCTGAAAGCGCTGCTCCAGTCATCGACACTTTGGCTGCTGGTTACGGTAAGGTCTTAGGTAAAGGTAGATTGCCACAAGTTCCTGTTGTTGTCAAGGCCAGATTTGTTTCCAAATTG…	OK	450	YES	CAA	Glutamine	Glutamine (CAA)
yHMPu5000041785_saccharomycopsis_sp_180604.g002286.m1	ATGCCTACTAGATTAACCAAAACCAGAAAACACAGAGGTCACGTCTCAGCCGGTAAGGGTCGTATCGGTAAACACAGAAAGCATCCTGGTGGTCGTGGTAAAGCCGGTGGTCAACACCACCACCGTATCAACATGGATAAATACCATCCTGGTTACTTCGGTAAAGTTGGTATGAGATACTTCCACAAACAACAAAACCACTTCTGGAAACCAGTCTTGAACTTGGACAAGTTGTGGACTTTGGTTCCTGAAGAAAAGAGAGAGTCTTACATCAAATCCGCTTCTGAGAGTGCTGCTCCTGTCATCGACACTTTGGCTGCTGGTTACGGTAAGGTCTTAGGTAAAGGTAGATTGCCACAAGTTCCAGTTGTTGTCAAGGCCAGATTTGTCTCCAAGTTG…	ATGCCTACTAGATTAACCAAAACCAGAAAACACAGAGGTCACGTCTCAGCCGGTAAGGGTCGTATCGGTAAACACAGAAAGCATCCTGGTGGTCGTGGTAAAGCCGGTGGTCAACACCACCACCGTATCAACATGGATAAATACCATCCTGGTTACTTCGGTAAAGTTGGTATGAGATACTTCCACAAACAACAAAACCACTTCTGGAAACCAGTCTTGAACTTGGACAAGTTGTGGACTTTGGTTCCTGAAGAAAAGAGAGAGTCTTACATCAAATCCGCTTCTGAGAGTGCTGCTCCTGTCATCGACACTTTGGCTGCTGGTTACGGTAAGGTCTTAGGTAAAGGTAGATTGCCACAAGTTCCAGTTGTTGTCAAGGCCAGATTTGTCTCCAAGTTG…	OK	450	YES	CAA	Glutamine	Glutamine (CAA)
yHMPu5000034661_dipodascus_albidus_180604.g000575.m1	ATGCCTACTAGATTAACAAAGACTAGAAAGCTTAGAGGCCACGTTTCAGCCGGTCACGGTCGTATCGGAAAGCACAGAAAGCATCCCGGTGGTAGAGGTATGGCTGGTGGTCAGCACCATCACCGTACCAACATGGACAAATATCATCCTGGTTACTTTGGTAAGGTTGGTATGAGATACTTCCATAAGCAACAAAACCACTTCTGGAAGCCCGTTCTCAATCTTGACAAGTTGTGGACTTTGGTTCCTGCTGAGAACAGAGAAAAGTACATTGCTCAATCTTCTGAGTCTGCTGCTCCTGTTATTGATACTTTGGCTGCTGGCTACGGTAAGGTTCTTGGTAAGGGTCGTCTTCCTAATGTTCCTGTCATTGTTAAGGCCAGATTTGTTTCTGCTCTT…	ATGCCTACTAGATTAACAAAGACTAGAAAGCTTAGAGGCCACGTTTCAGCCGGTCACGGTCGTATCGGAAAGCACAGAAAGCATCCCGGTGGTAGAGGTATGGCTGGTGGTCAGCACCATCACCGTACCAACATGGACAAATATCATCCTGGTTACTTTGGTAAGGTTGGTATGAGATACTTCCATAAGCAACAAAACCACTTCTGGAAGCCCGTTCTCAATCTTGACAAGTTGTGGACTTTGGTTCCTGCTGAGAACAGAGAAAAGTACATTGCTCAATCTTCTGAGTCTGCTGCTCCTGTTATTGATACTTTGGCTGCTGGCTACGGTAAGGTTCTTGGTAAGGGTCGTCTTCCTAATGTTCCTGTCATTGTTAAGGCCAGATTTGTTTCTGCTCTT…	OK	450	YES	CAG	Glutamine	Glutamine (CAG)
yHMPu5000037899_candida_koratica_180604_g000077.m1	ATGCCTACTAGATTAACAAAGACTAGAAAACATAGAGGACACGTTTCAGCCGGTAATGGTAGAATCGGTAAGCATAGAAAACATCCCGGTGGTAGAGGTATGGCTGGTGGTCAACATCATCACAGAACCAACTTGGATAAATACCATCCAGGTTACTTTGGTAAAGTAGGTATGAGATACTTTCACAAACAACAAAACCATTTCTGGAGACCGGAAATTAACTTGGACAAATTATGGACTTTGGTTGAATCCGACAAAAAAGATGAATACTTAAAAAATGCATCCGCTTCTTCTGCTCCAGTAATTGACACTTTAGCCCACGGTTACGGTAAAGTTTTGGGTAAAGGTAAATTACCTCAAGTTCCAGTCATTGTTAAAGCCAGATTTGTTTCCAAATTG…	ATGCCTACTAGATTAACAAAGACTAGAAAACATAGAGGACACGTTTCAGCCGGTAATGGTAGAATCGGTAAGCATAGAAAACATCCCGGTGGTAGAGGTATGGCTGGTGGTCAACATCATCACAGAACCAACTTGGATAAATACCATCCAGGTTACTTTGGTAAAGTAGGTATGAGATACTTTCACAAACAACAAAACCATTTCTGGAGACCGGAAATTAACTTGGACAAATTATGGACTTTGGTTGAATCCGACAAAAAAGATGAATACTTAAAAAATGCATCCGCTTCTTCTGCTCCAGTAATTGACACTTTAGCCCACGGTTACGGTAAAGTTTTGGGTAAAGGTAAATTACCTCAAGTTCCAGTCATTGTTAAAGCCAGATTTGTTTCCAAATTG…	OK	450	YES	CAA	Glutamine	Glutamine (CAA)
yHMPu5000035660_priceomyces_haplophilus_160613_g004432.m1	ATGCCTACTAGATTAACAAAGACCAGAAAGCACAGGGGAAACGTTTCAGCCGGTAAGGGTAGAGTTGGTAAGCACAGAAAGCATCCCGGTGGTCGTGGTAAGGCTGGTGGTCAACATCACCACAGAACCAATTTGGATAAGTACCATCCAGGTTACTTCGGTAAGGTTGGTATGAGATACTTCCACAAGCAACAAGGTCATTTCTGGAGACCAGAAATCAACTTGGACAAATTGTGGACCTTGGTCGACGAAGAAAAGAAGGAGTCTTACTTGAAGTCATCTTCTACTTCTGCTGCTCCAGTCATCGACACTTTAGCTCACGGTTACGGTAAGGTCTTGGGTAAAGGTAGATTGCCAGAAGTCCCAGTCATTGTTAAGGCTAGATTTGTCTCTAAGTTG…	ATGCCTACTAGATTAACAAAGACCAGAAAGCACAGGGGAAACGTTTCAGCCGGTAAGGGTAGAGTTGGTAAGCACAGAAAGCATCCCGGTGGTCGTGGTAAGGCTGGTGGTCAACATCACCACAGAACCAATTTGGATAAGTACCATCCAGGTTACTTCGGTAAGGTTGGTATGAGATACTTCCACAAGCAACAAGGTCATTTCTGGAGACCAGAAATCAACTTGGACAAATTGTGGACCTTGGTCGACGAAGAAAAGAAGGAGTCTTACTTGAAGTCATCTTCTACTTCTGCTGCTCCAGTCATCGACACTTTAGCTCACGGTTACGGTAAGGTCTTGGGTAAAGGTAGATTGCCAGAAGTCCCAGTCATTGTTAAGGCTAGATTTGTCTCTAAGTTG…	OK	450	YES	CAA	Glutamine	Glutamine (CAA)
yHMPu5000038379_candida_lidongshanica_180604_g002429.m1	ATGCCTACTAGATTAACAAAGACCAGAAAGCACAGAGGTCACGTTTCCGCCGGTAAGGGTAGAATCGGTAAGCACAGAAAGCATCCGGGTGGTCGTGGTAAGGCTGGTGGTCAACACCATCACAGAACTAACTTGGATAAATACCATCCAGGTTACTTTGGTAAGGTCGGTATGAGACACTTCCACAAGCAAGGTAACCACTACTGGAGACCAGAAATCAACTTGGACAAATTGTGGACCTTGGTTGACTCTGAAAAGAAGGATGAATACTTGAAGTCTGCTTCTACCTCCGCTGCCCCAGTCATTGACACCTTGGCTCACGGTTACGGTAAGGTTTTGGGTAAGGGTTCTTTACCACAAGTTCCAGTTATCGTCAAGGCTAGATTTGTTTCCAAGTTG…	ATGCCTACTAGATTAACAAAGACCAGAAAGCACAGAGGTCACGTTTCCGCCGGTAAGGGTAGAATCGGTAAGCACAGAAAGCATCCGGGTGGTCGTGGTAAGGCTGGTGGTCAACACCATCACAGAACTAACTTGGATAAATACCATCCAGGTTACTTTGGTAAGGTCGGTATGAGACACTTCCACAAGCAAGGTAACCACTACTGGAGACCAGAAATCAACTTGGACAAATTGTGGACCTTGGTTGACTCTGAAAAGAAGGATGAATACTTGAAGTCTGCTTCTACCTCCGCTGCCCCAGTCATTGACACCTTGGCTCACGGTTACGGTAAGGTTTTGGGTAAGGGTTCTTTACCACAAGTTCCAGTTATCGTCAAGGCTAGATTTGTTTCCAAGTTG…	OK	450	YES	CAA	Glutamine	Glutamine (CAA)
yHMPu5000035297_priceomyces_castillae_170307_g005346.m1	ATGCCTACTAGATTAACAAAGACCAGAAAGCACAGAGGCCACGTTTCAGCCGGTAAGGGTAGAATCGGTAAGCACAGAAAGCATCCCGGTGGTCGTGGTATGGCTGGTGGTCAACATCACCACAGAACCAACTTGGATAAGTACCATCCAGGTTACTTCGGTAAGGTTGGTATGAGATACTTCCACAAGCAACAAGGTCACTTCTGGAGACCAGAAATCAACTTGGACAAGTTGTGGACTTTGATTGACGAGGAGAAGAAGGAGACCTACTTGAAGTCTGCTTCTGCTTCTGCTGCTCCAGTCATTGACACCTTAGCTCACGGTTACGGTAAGGTCTTGGGTAAGGGTAGATTGCCAAATGTCCCAGTCATTGTCAAGGCTAGATTTGTCTCTAAGTTG…	ATGCCTACTAGATTAACAAAGACCAGAAAGCACAGAGGCCACGTTTCAGCCGGTAAGGGTAGAATCGGTAAGCACAGAAAGCATCCCGGTGGTCGTGGTATGGCTGGTGGTCAACATCACCACAGAACCAACTTGGATAAGTACCATCCAGGTTACTTCGGTAAGGTTGGTATGAGATACTTCCACAAGCAACAAGGTCACTTCTGGAGACCAGAAATCAACTTGGACAAGTTGTGGACTTTGATTGACGAGGAGAAGAAGGAGACCTACTTGAAGTCTGCTTCTGCTTCTGCTGCTCCAGTCATTGACACCTTAGCTCACGGTTACGGTAAGGTCTTGGGTAAGGGTAGATTGCCAAATGTCCCAGTCATTGTCAAGGCTAGATTTGTCTCTAAGTTG…	OK	450	YES	CAA	Glutamine	Glutamine (CAA)
yHMPu5000034606_priceomyces_medius_180604_g000267.m1	ATGCCTACTAGATTAACAAAGACCAGAAAGCACAGAGGAAACGTTTCAGCCGGTAAGGGTAGAATCGGTAAGCACAGAAAGCATCCAGGTGGTCGTGGTAAGGCTGGTGGTCAACATCACCACAGAACTAACTTGGATAAGTACCATCCAGGTTACTTCGGTAAGGTTGGTATGAGATACTTCCACAAGCAACAAGCTCACTTCTGGAGACCAGAAATTAACTTGGACAAATTGTGGACTTTGGTTGACGAAGAGAAGAGAGATGCTTACTTGAAGTCTGCTTCTGCTTCTGCCGCTCCAGTCATTGATACATTGGCTCTCGGTTACGGAAAGGTCTTAGGTAAGGGAAGATTGCCAGAAGTCCCAGTCATTGTCAAGGCTAGATTTGTTTCTAAGTTG…	ATGCCTACTAGATTAACAAAGACCAGAAAGCACAGAGGAAACGTTTCAGCCGGTAAGGGTAGAATCGGTAAGCACAGAAAGCATCCAGGTGGTCGTGGTAAGGCTGGTGGTCAACATCACCACAGAACTAACTTGGATAAGTACCATCCAGGTTACTTCGGTAAGGTTGGTATGAGATACTTCCACAAGCAACAAGCTCACTTCTGGAGACCAGAAATTAACTTGGACAAATTGTGGACTTTGGTTGACGAAGAGAAGAGAGATGCTTACTTGAAGTCTGCTTCTGCTTCTGCCGCTCCAGTCATTGATACATTGGCTCTCGGTTACGGAAAGGTCTTAGGTAAGGGAAGATTGCCAGAAGTCCCAGTCATTGTCAAGGCTAGATTTGTTTCTAAGTTG…	OK	450	YES	CAA	Glutamine	Glutamine (CAA)
yHMPu5000037254_candida_parachauliodis_210210_g005035.m1	ATGCCTACTAGATTAACAAAGACCAGAAAACATAGAGGTAACGTTTCTGCCGGTAAAGGTAGAGTTGGTAAACACAGAAAACATCCAGGTGGTAGAGGTAAAGCTGGTGGTCAACATCATCACAGAACCAATTTAGATAAATACCATCCAGGTTACTTTGGTAAAGTTGGTATGAGATATTTCAGAAAACAACAATTACACTTCTGGAGACCAGAAATTAACTTAGACAAATTATGGACTTTAGTCGAAAGTGATAAAAAAGATGAATACTTAAAATCATCATCAAAATCAGCTGCCCCAGTCATCGATACTTTAGCTCACGGTTACGGTAAAGTTTTAGGTAAAGGTAGATTACCAGAAGTTCCAGTTATCGTTAAAGCTAGATTTGTTTCAAAATTG…	ATGCCTACTAGATTAACAAAGACCAGAAAACATAGAGGTAACGTTTCTGCCGGTAAAGGTAGAGTTGGTAAACACAGAAAACATCCAGGTGGTAGAGGTAAAGCTGGTGGTCAACATCATCACAGAACCAATTTAGATAAATACCATCCAGGTTACTTTGGTAAAGTTGGTATGAGATATTTCAGAAAACAACAATTACACTTCTGGAGACCAGAAATTAACTTAGACAAATTATGGACTTTAGTCGAAAGTGATAAAAAAGATGAATACTTAAAATCATCATCAAAATCAGCTGCCCCAGTCATCGATACTTTAGCTCACGGTTACGGTAAAGTTTTAGGTAAAGGTAGATTACCAGAAGTTCCAGTTATCGTTAAAGCTAGATTTGTTTCAAAATTG…	OK	450	YES	CAA	Glutamine	Glutamine (CAA)
yHMPu5000026052_candida_buinensis_201018_g005963.m1	ATGCCTACTAGATTAACAAAAACTAGAAAACATAGAGGACACGTTTCAGCCGGTTACGGTAGAATTGGTAAACATAGAAAGCACTCTGGTGGTAGAGGTATGGCCGGTGGTCAACATCATCACAGAACCAACTTGGATAAATACCATCCAGGTTACTTCGGTAAAGTTGGTATGAGATACTTCCACAAACAACAAGCTCACTTCTGGAAACCAGAAATCAACTTGGACAAATTATGGACTTTAGTTGAATCTGATAAAAAAGATGAATACTTAAAAAACGCTTCAACTTCTGCTGCTCCAGTTATTGATACTTTAGCTCACGGTTACGGTAAAGTTTTAGGTAAAGGTAGATTACCTCAAGTTCCAATCATTGTCAAAGCTAGATTTGTTTCAAAATTA…	ATGCCTACTAGATTAACAAAAACTAGAAAACATAGAGGACACGTTTCAGCCGGTTACGGTAGAATTGGTAAACATAGAAAGCACTCTGGTGGTAGAGGTATGGCCGGTGGTCAACATCATCACAGAACCAACTTGGATAAATACCATCCAGGTTACTTCGGTAAAGTTGGTATGAGATACTTCCACAAACAACAAGCTCACTTCTGGAAACCAGAAATCAACTTGGACAAATTATGGACTTTAGTTGAATCTGATAAAAAAGATGAATACTTAAAAAACGCTTCAACTTCTGCTGCTCCAGTTATTGATACTTTAGCTCACGGTTACGGTAAAGTTTTAGGTAAAGGTAGATTACCTCAAGTTCCAATCATTGTCAAAGCTAGATTTGTTTCAAAATTA…	OK	450	YES	CAA	Glutamine	Glutamine (CAA)
yHMPu5000034924_nakazawaea_wyomingensis_160519.g000116.m1	ATGCCTACTAGATTAACAAAAACCAGAAAACACAGAGGTAACGTCTCAGCCGGTAACGGTCGTGTCGGTAAGCACAGAAAGCATCCCGGTGGTCGTGGTATGGCTGGTGGTCAACATCATCACAGAATTAACTTGGATAAATACCATCCTGGTTACTTTGGTAAAGTTGGTATGAGATACTTCCACAAACAACAAAACCAATTCTGGAGACCAGTTATCAACTTGGACAAATTATGGACTTTGGTTCCAGAATCAAACAGAGATGATTTGTTGAAATCTTCAAACAAATCAGCTGCTGTTGTCATTGATACTTTGGCTAACGGTTACGGTAAAGTTTTAGGTAAAGGTAAATTACCAGAAGTTCCAGTTATTGTCAAGGCTAGATTTGTTTCCAAATTG…	ATGCCTACTAGATTAACAAAAACCAGAAAACACAGAGGTAACGTCTCAGCCGGTAACGGTCGTGTCGGTAAGCACAGAAAGCATCCCGGTGGTCGTGGTATGGCTGGTGGTCAACATCATCACAGAATTAACTTGGATAAATACCATCCTGGTTACTTTGGTAAAGTTGGTATGAGATACTTCCACAAACAACAAAACCAATTCTGGAGACCAGTTATCAACTTGGACAAATTATGGACTTTGGTTCCAGAATCAAACAGAGATGATTTGTTGAAATCTTCAAACAAATCAGCTGCTGTTGTCATTGATACTTTGGCTAACGGTTACGGTAAAGTTTTAGGTAAAGGTAAATTACCAGAAGTTCCAGTTATTGTCAAGGCTAGATTTGTTTCCAAATTG…	OK	450	YES	CAA	Glutamine	Glutamine (CAA)
yHMPu5000034923_nakazawaea_wickerhamii_160519.g000562.m1	ATGCCTACTAGATTAACAAAAACCAGAAAACACAGAGGTAACGTCTCAGCCGGTAACGGTCGTATTGGTAAGCACAGAAAGCACCCGGGTGGTCGTGGTATGGCTGGTGGTCAACATCATCACAGAACTAATTTAGATAAATATCATCCAGGTTATTTCGGTAAAGTTGGTATGAGATATTTCCATAAACAACAAAATCAATTCTGGAGACCAGTTATCAATTTAGATAAATTATGGACTTTAGTACCAAGTTCAAATAAAGATGAATTATTAAAATCATCAAATAAATCTTCAGCTGTTGTTATTGATACTTTAGCTAACGGTTACGGTAAAGTCTTGGGTAAAGGTAGATTACCACAAGTTCCTGTCATTGTTAAGGCAAGATTTGTCTCAAAATTA…	ATGCCTACTAGATTAACAAAAACCAGAAAACACAGAGGTAACGTCTCAGCCGGTAACGGTCGTATTGGTAAGCACAGAAAGCACCCGGGTGGTCGTGGTATGGCTGGTGGTCAACATCATCACAGAACTAATTTAGATAAATATCATCCAGGTTATTTCGGTAAAGTTGGTATGAGATATTTCCATAAACAACAAAATCAATTCTGGAGACCAGTTATCAATTTAGATAAATTATGGACTTTAGTACCAAGTTCAAATAAAGATGAATTATTAAAATCATCAAATAAATCTTCAGCTGTTGTTATTGATACTTTAGCTAACGGTTACGGTAAAGTCTTGGGTAAAGGTAGATTACCACAAGTTCCTGTCATTGTTAAGGCAAGATTTGTCTCAAAATTA…	OK	450	YES	CAA	Glutamine	Glutamine (CAA)
yHMH393_Yamadazyma_sp_nov_plate33_MASURCA_g005085.m1	ATGCCTACTAGATACACTAAAACTAGAAAACACAGAGGACACGTTTCTGCCGGTCACGGTAGAATTGGTAAGCACAGAAAGCATCCCGGTGGTAGAGGTATGGCTGGTGGTCAACATCACCACAGAACCAACTTGGATAAATACCATCCAGGTTACTTCGGTAAAGTTGGTATGAGATACTTCCACAAACAACAAAACCACTTCTGGAGACCAGAAATCAACTTGGACAAATTATGGACTTTAGTTGAAGAAGAAAAGAAAGAAGAATACTTAAAATCTGCTTCTAAATCCGCAGCTCCAGTCATCGACACTTTAGCTCACGGTTACGGTAAAGTTTTAGGTAAAGGTAGATTACCAGAAGTTCCAGTCATCGTCAAGGCCAGATTTGTTTCCAAATTA…	ATGCCTACTAGATACACTAAAACTAGAAAACACAGAGGACACGTTTCTGCCGGTCACGGTAGAATTGGTAAGCACAGAAAGCATCCCGGTGGTAGAGGTATGGCTGGTGGTCAACATCACCACAGAACCAACTTGGATAAATACCATCCAGGTTACTTCGGTAAAGTTGGTATGAGATACTTCCACAAACAACAAAACCACTTCTGGAGACCAGAAATCAACTTGGACAAATTATGGACTTTAGTTGAAGAAGAAAAGAAAGAAGAATACTTAAAATCTGCTTCTAAATCCGCAGCTCCAGTCATCGACACTTTAGCTCACGGTTACGGTAAAGTTTTAGGTAAAGGTAGATTACCAGAAGTTCCAGTCATCGTCAAGGCCAGATTTGTTTCCAAATTA…	OK	450	YES	CAA	Glutamine	Glutamine (CAA)
yHMPu5000038314_yamadazyma_mexicana_170713_g005744.m1	ATGCCTACTAGATACACTAAAACTAGAAAACACAGAGGACACGTTTCTGCCGGTCACGGTAGAATTGGTAAGCACAGAAAGCATCCCGGTGGTAGAGGTATGGCTGGTGGTCAACACCACCACAGAACCAACTTGGATAAATACCATCCAGGTTACTTCGGTAAAGTTGGTATGAGATACTTCCACAAACAACAAAACCACTTCTGGAGACCAGAAATCAACTTGGACAAATTATGGACTTTAGTTGATGAAGAAAAGAAAGACGAATACTTAAAATCTGCTTCTAAATCCGCTGCTCCAGTTATCGACACCTTAGCTCACGGTTACGGTAAAGTCTTAGGTAAAGGTAGATTACCAGAAGTTCCAGTCATTGTCAAAGCCAGATTTGTTTCTAAATTA…	ATGCCTACTAGATACACTAAAACTAGAAAACACAGAGGACACGTTTCTGCCGGTCACGGTAGAATTGGTAAGCACAGAAAGCATCCCGGTGGTAGAGGTATGGCTGGTGGTCAACACCACCACAGAACCAACTTGGATAAATACCATCCAGGTTACTTCGGTAAAGTTGGTATGAGATACTTCCACAAACAACAAAACCACTTCTGGAGACCAGAAATCAACTTGGACAAATTATGGACTTTAGTTGATGAAGAAAAGAAAGACGAATACTTAAAATCTGCTTCTAAATCCGCTGCTCCAGTTATCGACACCTTAGCTCACGGTTACGGTAAAGTCTTAGGTAAAGGTAGATTACCAGAAGTTCCAGTCATTGTCAAAGCCAGATTTGTTTCTAAATTA…	OK	450	YES	CAA	Glutamine	Glutamine (CAA)
yHMPu5000035642_yamadazyma_triangularis_170307_g004676.m1	ATGCCTACTAGACTTACTCAAACTAGAAAACATAGAGGACACGTTTCTGCCGGTAAAGGTAGAGTCGGTAAACACAGAAAACATCCAGGTGGTAAAGGTATGGCTGGTGGTCAACACCATCACAGAACCAACATGGATAAATACCATCCAGGTTACTTCGGTAAAGTTGGTATGAGATACTTCCACAAACAACAAAACCACTTCTGGAGACCAGAAGTCAACTTAGACAAATTATGGACTTTAGTTGAAGACTCTAAAAGAGAAGAATACTTAAAGACCTCTTCTGCTTCTGCCGCCCCAGTTATTGACACTTTAGCTCACGGTTACGGTAAAGTTTTAGGTAAAGGTAGATTACCACAAGTTCCAGTAATTGTCAAAGCTAGATTTGTCTCTAAATTA…	ATGCCTACTAGACTTACTCAAACTAGAAAACATAGAGGACACGTTTCTGCCGGTAAAGGTAGAGTCGGTAAACACAGAAAACATCCAGGTGGTAAAGGTATGGCTGGTGGTCAACACCATCACAGAACCAACATGGATAAATACCATCCAGGTTACTTCGGTAAAGTTGGTATGAGATACTTCCACAAACAACAAAACCACTTCTGGAGACCAGAAGTCAACTTAGACAAATTATGGACTTTAGTTGAAGACTCTAAAAGAGAAGAATACTTAAAGACCTCTTCTGCTTCTGCCGCCCCAGTTATTGACACTTTAGCTCACGGTTACGGTAAAGTTTTAGGTAAAGGTAGATTACCACAAGTTCCAGTAATTGTCAAAGCTAGATTTGTCTCTAAATTA…	OK	450	YES	CAA	Glutamine	Glutamine (CAA)
yHMPu5000035642_yamadazyma_triangularis_170307_g004926.m1	ATGCCTACTAGACTTACTCAAACTAGAAAACATAGAGGACACGTTTCTGCCGGTAAAGGTAGAGTCGGTAAACACAGAAAACATCCAGGTGGTAAAGGTATGGCTGGTGGTCAACACCATCACAGAACCAACATGGATAAATACCATCCAGGTTACTTCGGTAAAGTTGGTATGAGATACTTCCACAAACAACAAAACCACTTCTGGAGACCAGAAATCAACTTAGACAAATTATGGACTTTAGTTGAAGACTCTAAAAGAGAAGAATACTTAAAGACCTCTTCTGCTTCTGCTGCCCCAGTTATTGACACTTTAGCTTTCGGTTACGGTAAAGTTTTAGGTAAAGGTAGATTACCACAAGTTCCAGTAATTGTCAAAGCTAGATTTGTCTCTAAATTA…	ATGCCTACTAGACTTACTCAAACTAGAAAACATAGAGGACACGTTTCTGCCGGTAAAGGTAGAGTCGGTAAACACAGAAAACATCCAGGTGGTAAAGGTATGGCTGGTGGTCAACACCATCACAGAACCAACATGGATAAATACCATCCAGGTTACTTCGGTAAAGTTGGTATGAGATACTTCCACAAACAACAAAACCACTTCTGGAGACCAGAAATCAACTTAGACAAATTATGGACTTTAGTTGAAGACTCTAAAAGAGAAGAATACTTAAAGACCTCTTCTGCTTCTGCTGCCCCAGTTATTGACACTTTAGCTTTCGGTTACGGTAAAGTTTTAGGTAAAGGTAGATTACCACAAGTTCCAGTAATTGTCAAAGCTAGATTTGTCTCTAAATTA…	OK	450	YES	CAA	Glutamine	Glutamine (CAA)
yHMPu5000034642_candida_zeylanoides_160519_g004248.m1	ATGCCTACTAGACTCACTAAGACCAGAAAGCACAGAGGCCATGTTTCTGCCGGTAAGGGTAGAGTTGGCAAGCACAGAAAGAATCCCGGTGGTAGAGGTATGGCTGGTGGTCAACATCATCACAGAACCAACTTGGACAAGTACCACCCCGGTTACTTCGGTAAGGTTGGTATGAGATACTTCCACAAGCAGCAGAACCACTTCTGGAGACCAGAGCTCAACTTGGACAAGTTGTGGACCTTGGTGGATGCTGACAAGAAGGACGAGTACTTGAAGTCTGCGTCGAGCTCTGCCGCCCCCGTCATCGACACGTTGGCCCACGGCTACGGTAAGGTTTTGGGTAAGGGTAGATTGCCCGAGGTCCCTGTTATTGTCAGGGCCAGATTTGTTTCCAAGTTG…	ATGCCTACTAGACTCACTAAGACCAGAAAGCACAGAGGCCATGTTTCTGCCGGTAAGGGTAGAGTTGGCAAGCACAGAAAGAATCCCGGTGGTAGAGGTATGGCTGGTGGTCAACATCATCACAGAACCAACTTGGACAAGTACCACCCCGGTTACTTCGGTAAGGTTGGTATGAGATACTTCCACAAGCAGCAGAACCACTTCTGGAGACCAGAGCTCAACTTGGACAAGTTGTGGACCTTGGTGGATGCTGACAAGAAGGACGAGTACTTGAAGTCTGCGTCGAGCTCTGCCGCCCCCGTCATCGACACGTTGGCCCACGGCTACGGTAAGGTTTTGGGTAAGGGTAGATTGCCCGAGGTCCCTGTTATTGTCAGGGCCAGATTTGTTTCCAAGTTG…	OK	450	YES	CAA	Glutamine	Glutamine (CAA)
yHMPu5000034887_ogataea_trehaloabstinens_160519.g003425.m1	ATGCCTACTAGACTCACTAAGACAAGAAAGCATAGAGGACACGTTTCCGCCGGTAACGGTCGTGTTGGAAAGCACAGAAAGCATCCCGGTGGAAGAGGTATGGCCGGTGGTCAGCACCACCACAGAACCAACTTGGACAAGTACCACCCTGGTTACTTCGGTAAGGTTGGAATGAGATACTTCCACAAACAACAAAACCACTTCTGGAAGCCTGTGATCAATCTTGATAAGCTATGGTCCCTAGTTGAAGCCAAGGATGAGAAAATTGCTTCATCTACCAAGGATTCTGCCGTTGTGATTGACACTCTTGCTAAAGGTTACGGAAAGGTGCTCGGAAAGGGAAGACTTCCTCAAGTTCCTGTGATTGTCAAAGCCAGATATGTGTCGAAGCTAGCTGAG…	ATGCCTACTAGACTCACTAAGACAAGAAAGCATAGAGGACACGTTTCCGCCGGTAACGGTCGTGTTGGAAAGCACAGAAAGCATCCCGGTGGAAGAGGTATGGCCGGTGGTCAGCACCACCACAGAACCAACTTGGACAAGTACCACCCTGGTTACTTCGGTAAGGTTGGAATGAGATACTTCCACAAACAACAAAACCACTTCTGGAAGCCTGTGATCAATCTTGATAAGCTATGGTCCCTAGTTGAAGCCAAGGATGAGAAAATTGCTTCATCTACCAAGGATTCTGCCGTTGTGATTGACACTCTTGCTAAAGGTTACGGAAAGGTGCTCGGAAAGGGAAGACTTCCTCAAGTTCCTGTGATTGTCAAAGCCAGATATGTGTCGAAGCTAGCTGAG…	OK	444	YES	CAG	Glutamine	Glutamine (CAG)
yHMPu5000034908_candida_sp_160519.g001689.m1	ATGCCTACTAGACTCACTAAGACAAGAAAGCACAGAGGACATGTGTCCGCCGGTAACGGTCGTGTTGGAAAGCACAGAAAGCATCCCGGTGGAAGAGGTATGGCTGGTGGTCAACACCACCACAGAACCAACTTAGACAAGTACCATCCTGGTTACTTCGGTAAAGTTGGTATGAGATACTTCCACAAACAACAAAACCACTTCTGGAAGCCTGTGATCAACCTTGATAAGCTATGGTCTCTTGTTGAAGCCAAGGATGAGAAACTTGCTTCATCTACCAAGGATGCCGCTGTTGTGATTGATACTCTTGCTAAAGGTTACGGAAAGGTGCTTGGAAAGGGAAGACTTCCTCAAGTTCCTGTGATTGTCAAAGCCAGATATGTGTCGAAACTAGCTGAG…	ATGCCTACTAGACTCACTAAGACAAGAAAGCACAGAGGACATGTGTCCGCCGGTAACGGTCGTGTTGGAAAGCACAGAAAGCATCCCGGTGGAAGAGGTATGGCTGGTGGTCAACACCACCACAGAACCAACTTAGACAAGTACCATCCTGGTTACTTCGGTAAAGTTGGTATGAGATACTTCCACAAACAACAAAACCACTTCTGGAAGCCTGTGATCAACCTTGATAAGCTATGGTCTCTTGTTGAAGCCAAGGATGAGAAACTTGCTTCATCTACCAAGGATGCCGCTGTTGTGATTGATACTCTTGCTAAAGGTTACGGAAAGGTGCTTGGAAAGGGAAGACTTCCTCAAGTTCCTGTGATTGTCAAAGCCAGATATGTGTCGAAACTAGCTGAG…	OK	444	YES	CAA	Glutamine	Glutamine (CAA)
yHMPu5000038071_diutina_scorzettiae_170912.g003502.m1	ATGCCTACTAGACTCACCAAGACCAGAAAGCACAGAGGTAACGTTTCCGCCGGTAAGGGGAGAGTCGGTAAGCACAGAAAGTCGCCTGGTGGTAGAGGTATGGCCGGGGGTCAACACCACCACAGAACCAACATGGACAAGTACCACCCTGGTTACTTCGGTAAGGTTGGTATGAGATACTTCCACAAGCAAAAGGGTCACTTCTGGGCTCCCCAAATCAACTTGGACAAGTTGTGGTCGTTGGTGCCTGAAGACAAGCGGGACGAATACTTGAAGTCCGCTTCGGCTTCTGCTGCTCCCGTTATCGACACCTTGGCCTTCGGTTACGGCAAGGTGTTGGGTAAGGGTTCGTTGCCCCAAGTCCCCGTCATTGTCAAGGCCAGATTTGTCTCGAAGTTG…	ATGCCTACTAGACTCACCAAGACCAGAAAGCACAGAGGTAACGTTTCCGCCGGTAAGGGGAGAGTCGGTAAGCACAGAAAGTCGCCTGGTGGTAGAGGTATGGCCGGGGGTCAACACCACCACAGAACCAACATGGACAAGTACCACCCTGGTTACTTCGGTAAGGTTGGTATGAGATACTTCCACAAGCAAAAGGGTCACTTCTGGGCTCCCCAAATCAACTTGGACAAGTTGTGGTCGTTGGTGCCTGAAGACAAGCGGGACGAATACTTGAAGTCCGCTTCGGCTTCTGCTGCTCCCGTTATCGACACCTTGGCCTTCGGTTACGGCAAGGTGTTGGGTAAGGGTTCGTTGCCCCAAGTCCCCGTCATTGTCAAGGCCAGATTTGTCTCGAAGTTG…	OK	450	YES	CAA	Glutamine	Glutamine (CAA)
yHMPu5000038070_diutina_ranongensis_170912.g004919.m1	ATGCCTACTAGACTCACCAAGACCAGAAAGCACAGAGGTAACGTTTCCGCCGGTAAGGGGAGAATCGGTAAGCACAGAAAGTCGCCTGGTGGTAGAGGTATGGCCGGGGGTCAACACCACCACAGAACTAACATGGATAAGTACCACCCTGGTTACTTCGGTAAGGTTGGTATGAGATACTTCCACAAGCAACAAGGTCACTTCTGGAGACCCGAAATCAACTTGGACAAGTTGTGGACTTTGGTTCCTGAAGACAAGAGAGACGAATACTTGAAGTCCGCCTCTGCCTCCGCTGCCCCCGTCATTGACACTTTGGCTCACGGTTACGGTAAGGTTTTGGGTAAGGGTAAGTTGCCTCAAGTCCCCGTCATTGTCAAGGCCAGATTTGTCTCCAAGTTG…	ATGCCTACTAGACTCACCAAGACCAGAAAGCACAGAGGTAACGTTTCCGCCGGTAAGGGGAGAATCGGTAAGCACAGAAAGTCGCCTGGTGGTAGAGGTATGGCCGGGGGTCAACACCACCACAGAACTAACATGGATAAGTACCACCCTGGTTACTTCGGTAAGGTTGGTATGAGATACTTCCACAAGCAACAAGGTCACTTCTGGAGACCCGAAATCAACTTGGACAAGTTGTGGACTTTGGTTCCTGAAGACAAGAGAGACGAATACTTGAAGTCCGCCTCTGCCTCCGCTGCCCCCGTCATTGACACTTTGGCTCACGGTTACGGTAAGGTTTTGGGTAAGGGTAAGTTGCCTCAAGTCCCCGTCATTGTCAAGGCCAGATTTGTCTCCAAGTTG…	OK	450	YES	CAA	Glutamine	Glutamine (CAA)
yHMPu5000034637_ogataea_populiabae_180604.g005266.m1	ATGCCTACTAGACTAACCAAGACAAGAAAGCACAGAGGTCACGTTTCGGCCGGTAATGGTCGTGTTGGAAAGCACAGAAAGCATCCGGGTGGTAGAGGTATGGCCGGTGGTCAGCACCACCACAGAACCAACTTGGACAAGTACCACCCTGGTTACTTCGGTAAAGTTGGTATGAGATACTTCCACAAGCAACAGGCTCACTTCTGGAAACCAGTTATCAACCTCGACAAGCTCTGGTCCCTAGTTGAGAACAAGGACGAGAAGCTCGCTTCATCCACTAAGGACTCCGCTGTTATCATCGATACATTGGCCAAGGGTTACGGTAAGGTGTTAGGCAAGGGTAGATTACCAGAGGTCCCTGTCATTGTCAAAGCTAGATACGTCTCTAAGTTGGCTGAG…	ATGCCTACTAGACTAACCAAGACAAGAAAGCACAGAGGTCACGTTTCGGCCGGTAATGGTCGTGTTGGAAAGCACAGAAAGCATCCGGGTGGTAGAGGTATGGCCGGTGGTCAGCACCACCACAGAACCAACTTGGACAAGTACCACCCTGGTTACTTCGGTAAAGTTGGTATGAGATACTTCCACAAGCAACAGGCTCACTTCTGGAAACCAGTTATCAACCTCGACAAGCTCTGGTCCCTAGTTGAGAACAAGGACGAGAAGCTCGCTTCATCCACTAAGGACTCCGCTGTTATCATCGATACATTGGCCAAGGGTTACGGTAAGGTGTTAGGCAAGGGTAGATTACCAGAGGTCCCTGTCATTGTCAAAGCTAGATACGTCTCTAAGTTGGCTGAG…	OK	444	YES	CAG	Glutamine	Glutamine (CAG)
yHMPu5000041830_candida_silvatica_170307.g003358.m1	ATGCCTACGAGATTCAGACAGACGAGAAAGCACAGAGGTAACGTGACCTGCGGTTACGGTCGTATCGGTAAGCACAGAAAGCACCCCGGTGGACGTGGTCTCGCTGGTGGTCAGCACCACCACCGTATCGCCATGGACAAGTACCATCCAGGTTACTTTGGTAAGGTCGGTATGAGATTCTTCCACAAGCAGAAGAACCCATTCTGGAAGCCAGTCATCAACCTCGACAGCCTGTGGTCGCTTGTTGAGGACAAGGACGAGAAGCTGGCCAAGTCCACTAAGGACTCGGCTGTTGTGATCGACACACTGGCCTCCGGCTACGGCAAGGTTCTTGGAAAGGGCAGACTCCCTAACGTTCCTGTCATTGTCAAGGCCCGTTACGTTTCGAAGCTTGCTGAG…	ATGCCTACGAGATTCAGACAGACGAGAAAGCACAGAGGTAACGTGACCTGCGGTTACGGTCGTATCGGTAAGCACAGAAAGCACCCCGGTGGACGTGGTCTCGCTGGTGGTCAGCACCACCACCGTATCGCCATGGACAAGTACCATCCAGGTTACTTTGGTAAGGTCGGTATGAGATTCTTCCACAAGCAGAAGAACCCATTCTGGAAGCCAGTCATCAACCTCGACAGCCTGTGGTCGCTTGTTGAGGACAAGGACGAGAAGCTGGCCAAGTCCACTAAGGACTCGGCTGTTGTGATCGACACACTGGCCTCCGGCTACGGCAAGGTTCTTGGAAAGGGCAGACTCCCTAACGTTCCTGTCATTGTCAAGGCCCGTTACGTTTCGAAGCTTGCTGAG…	OK	444	YES	CAG	Glutamine	Glutamine (CAG)
yHMPu5000041821_geotrichum_cucujoidarum_170912.g007163.m1	ATGCCTACCCGTTTGACCAAGACTAGAAAGCTCAGAGGACACGTCTCAGCCGGTCACGGACGTATCGGAAAGCACAGAAAGCATCCCGGTGGTCGTGGTATGGCCGGTGGTCAGCACCACCACCGTACCAACATGGACAAGTACCATCCCGGTTACTTCGGTAAGGTTGGTATGAGATACTTCCACAAGCAGCAGAACCACTTCTGGAAGCCCGTCCTCAACCTCGACAAGCTGTGGACCCTCGTCCCTGCTGAGAACAGAGAGAAGTACATTGCTGCTGCCTCTCCTTCCGCTGCCCCCGTCATTGACACCCTCGCTGCCGGCTACGGCAAGGTCCTTGCCAAGGGTCGTTTGCCCAACGTCCCTGTCATTGTCAAGGCCAGATTCGTCTCCAAGCTC…	ATGCCTACCCGTTTGACCAAGACTAGAAAGCTCAGAGGACACGTCTCAGCCGGTCACGGACGTATCGGAAAGCACAGAAAGCATCCCGGTGGTCGTGGTATGGCCGGTGGTCAGCACCACCACCGTACCAACATGGACAAGTACCATCCCGGTTACTTCGGTAAGGTTGGTATGAGATACTTCCACAAGCAGCAGAACCACTTCTGGAAGCCCGTCCTCAACCTCGACAAGCTGTGGACCCTCGTCCCTGCTGAGAACAGAGAGAAGTACATTGCTGCTGCCTCTCCTTCCGCTGCCCCCGTCATTGACACCCTCGCTGCCGGCTACGGCAAGGTCCTTGCCAAGGGTCGTTTGCCCAACGTCCCTGTCATTGTCAAGGCCAGATTCGTCTCCAAGCTC…	OK	450	YES	CAG	Glutamine	Glutamine (CAG)
yHMPu5000037876_geotrichum_fermentans_190924.g007261.m1	ATGCCTACCCGTTTGACCAAGACCAGAAAGCTTAGAGGACACGTCTCCGCCGGTCACGGACGTATCGGAAAGCACAGAAAGCATCCCGGTGGTCGTGGTATGGCCGGTGGTCAGCACCACCACCGTACCAACATGGATAAGTACCATCCTGGTTACTTTGGTAAGGTTGGTATGAGACACTTCCACGTCCAGAACAACCGCTCTTGGAAGCCCGTGCTCAACCTCGACAAGCTGTGGACCCTTGTCCCTGCTGAGAACAGAGAGAAGTACATTGCTTCTGCCTCTGCCTCTGCTGCCCCCGTCATTGACACCCTCGCTGCCGGTTACGGAAAGGTCCTTGGTAAGGGTCGTCTGCCCAATGTCCCCGTCATTGTCAAGGCCAGATTTGTCTCTCAGCTC…	ATGCCTACCCGTTTGACCAAGACCAGAAAGCTTAGAGGACACGTCTCCGCCGGTCACGGACGTATCGGAAAGCACAGAAAGCATCCCGGTGGTCGTGGTATGGCCGGTGGTCAGCACCACCACCGTACCAACATGGATAAGTACCATCCTGGTTACTTTGGTAAGGTTGGTATGAGACACTTCCACGTCCAGAACAACCGCTCTTGGAAGCCCGTGCTCAACCTCGACAAGCTGTGGACCCTTGTCCCTGCTGAGAACAGAGAGAAGTACATTGCTTCTGCCTCTGCCTCTGCTGCCCCCGTCATTGACACCCTCGCTGCCGGTTACGGAAAGGTCCTTGGTAAGGGTCGTCTGCCCAATGTCCCCGTCATTGTCAAGGCCAGATTTGTCTCTCAGCTC…	OK	450	YES	CAG	Glutamine	Glutamine (CAG)
yHMPu5000037239_wickerhamiella_brachini_210210_g002910.m1	ATGCCTACCCGTTTCTCGAAGACCCGCAAAGCCCGCGGCAACGTTTCTGCCGGTTATGGCCGCATTGGCAAGCACCGGAAGAATCCCGGTGGTCGCGGTATGGCCGGTGGCCAGCACCATCACCGTACTAACCTCGATAAGTACCACCCTGGTTACTTTGGTAAGGTTGGTTTCCGTCACTTCCACCTGCTCAAGAACCGTGAGTGGCGCCCCGTCCTGAACCTGGAGAAGCTTTGGTCTCTGGTTCCCGCCGAGGACCGTGAGAAGTACGTTTCCTCTGCTTCCGCCGAGTCTGCTCCCGTCATCGACACCCTGGCTGCCGGCTACGGTAAGGTGCTCGGCAAGGGCCGCATCCCTAATGTCCCCGTCATTGTCCGTGCTCGCTTTGTCTCTGAGCTC…	ATGCCTACCCGTTTCTCGAAGACCCGCAAAGCCCGCGGCAACGTTTCTGCCGGTTATGGCCGCATTGGCAAGCACCGGAAGAATCCCGGTGGTCGCGGTATGGCCGGTGGCCAGCACCATCACCGTACTAACCTCGATAAGTACCACCCTGGTTACTTTGGTAAGGTTGGTTTCCGTCACTTCCACCTGCTCAAGAACCGTGAGTGGCGCCCCGTCCTGAACCTGGAGAAGCTTTGGTCTCTGGTTCCCGCCGAGGACCGTGAGAAGTACGTTTCCTCTGCTTCCGCCGAGTCTGCTCCCGTCATCGACACCCTGGCTGCCGGCTACGGTAAGGTGCTCGGCAAGGGCCGCATCCCTAATGTCCCCGTCATTGTCCGTGCTCGCTTTGTCTCTGAGCTC…	OK	450	YES	CAG	Glutamine	Glutamine (CAG)
yHMPu5000038352_candida_sergipensis_180604_g000902.m1	ATGCCTACCCGTTTCTCGAAGACCCGCAAAGCCCGCGGCAACGTTTCTGCCGGTTATGGCCGCATTGGCAAGCACCGGAAGAATCCCGGTGGTCGCGGTATGGCCGGTGGCCAGCACCACCACCGCACCAACCTCGATAAGTACCACCCTGGTTACTTTGGTAAGGTCGGTTTCCGTCACTACCACCTGCTCAAGAACCGTGAGTGGCGCCCCGTTCTGAACCTGGAGAAGCTGTGGTCTCTGGTTCCCACCGAGGACCGCGAGAAGTACATCTCCTCCGCCTCGGCCGAGTCTGCTCCCGTCATCGACACCCTGGCTGCTGGCTACGGTAAGGTGCTCGGCAAGGGCCGCATCCCTAATGTCCCCGTCATTGTCCGCGCTCGCTTTGTGTCTGAGCTC…	ATGCCTACCCGTTTCTCGAAGACCCGCAAAGCCCGCGGCAACGTTTCTGCCGGTTATGGCCGCATTGGCAAGCACCGGAAGAATCCCGGTGGTCGCGGTATGGCCGGTGGCCAGCACCACCACCGCACCAACCTCGATAAGTACCACCCTGGTTACTTTGGTAAGGTCGGTTTCCGTCACTACCACCTGCTCAAGAACCGTGAGTGGCGCCCCGTTCTGAACCTGGAGAAGCTGTGGTCTCTGGTTCCCACCGAGGACCGCGAGAAGTACATCTCCTCCGCCTCGGCCGAGTCTGCTCCCGTCATCGACACCCTGGCTGCTGGCTACGGTAAGGTGCTCGGCAAGGGCCGCATCCCTAATGTCCCCGTCATTGTCCGCGCTCGCTTTGTGTCTGAGCTC…	OK	450	YES	CAG	Glutamine	Glutamine (CAG)
yHMPu5000035276_Candida_spandovensis_SPADES_g004047.m1	ATGCCTACCCGTTTCTCGAAAACCCGCAAGTCTCGCGGCAACGTCTCCGCCGGTTATGGCCGCGTTGGCAAGCACCGGAAGAATCCTGGTGGTCGCGGTATGGCCGGTGGCCAGCACCACCACCGTACTAACCTCGATAAGTACCACCCTGGTTACTTCGGTAAGGTTGGTTTCCGTCACTTCCATCTGCTCAAGAACCGTGAGTGGCGCCCCGTCCTGAACCTGGAGAAGCTTTGGTCTCTGGTTCCCACTGAGGACCGTGAGAAGTACATCTCGTCTGCTTCCGCCGAGTCTGCCCCCGTCATCGACACCCTGGCTGCTGGCTACGGTAAGGTGCTCGGCAAGGGCCGCATCCCTAATGTCCCCGTCATTGTCCGTGCTCGTTTCGTCTCTGAGCTC…	ATGCCTACCCGTTTCTCGAAAACCCGCAAGTCTCGCGGCAACGTCTCCGCCGGTTATGGCCGCGTTGGCAAGCACCGGAAGAATCCTGGTGGTCGCGGTATGGCCGGTGGCCAGCACCACCACCGTACTAACCTCGATAAGTACCACCCTGGTTACTTCGGTAAGGTTGGTTTCCGTCACTTCCATCTGCTCAAGAACCGTGAGTGGCGCCCCGTCCTGAACCTGGAGAAGCTTTGGTCTCTGGTTCCCACTGAGGACCGTGAGAAGTACATCTCGTCTGCTTCCGCCGAGTCTGCCCCCGTCATCGACACCCTGGCTGCTGGCTACGGTAAGGTGCTCGGCAAGGGCCGCATCCCTAATGTCCCCGTCATTGTCCGTGCTCGTTTCGTCTCTGAGCTC…	OK	450	YES	CAG	Glutamine	Glutamine (CAG)
yHMPu5000038042_wickerhamiella_allomyrinae_170912_g001380.m1	ATGCCTACCCGTCTCTCGAAAACCCGCAAGTCGCGCGGCCACGTCTCGGCCGGTTATGGCCGCATTGGCAAGCACCGCAAGAATCCCGGTGGTCGTGGTATGGCCGGTGGCCAGCATCACCACCGCACTAACCTGGATAAGTACCATCCTGGTTACTTCGGAAAGCTCGGTTTCCGTCACTACCACCTTCTTAAGAACCGTCAGTGGCGCCCGGTGCTGAACCTGGACAAGCTGTGGTCGCTGGTGCCCGCTGAGGACCGCGAGAAGCACCTCACTTCTGCCAGCGCTGACGCTGCTGTTGTTATCGACACTCTGGCTGCTGGCTACGGCAAGGTTCTTGGTAAGGGCCGCATCCCCGATGTGCCCGTTATTGTGCGTGCTCGCTTTGTCTCCGAGCTC…	ATGCCTACCCGTCTCTCGAAAACCCGCAAGTCGCGCGGCCACGTCTCGGCCGGTTATGGCCGCATTGGCAAGCACCGCAAGAATCCCGGTGGTCGTGGTATGGCCGGTGGCCAGCATCACCACCGCACTAACCTGGATAAGTACCATCCTGGTTACTTCGGAAAGCTCGGTTTCCGTCACTACCACCTTCTTAAGAACCGTCAGTGGCGCCCGGTGCTGAACCTGGACAAGCTGTGGTCGCTGGTGCCCGCTGAGGACCGCGAGAAGCACCTCACTTCTGCCAGCGCTGACGCTGCTGTTGTTATCGACACTCTGGCTGCTGGCTACGGCAAGGTTCTTGGTAAGGGCCGCATCCCCGATGTGCCCGTTATTGTGCGTGCTCGCTTTGTCTCCGAGCTC…	OK	450	YES	CAG	Glutamine	Glutamine (CAG)
yHMPu5000038047_wickerhamiella_slavikovae_170912_g003369.m1	ATGCCTACCCGCTTTTCAAAGACAAGAAAGAGCCGTGGTAACGTTTCCGCCGGTTACGGTCGTATCGGAAAGCACCGCAAGAGCTCCGGTGGTCGTGGTATGGCCGGTGGTCAGCACCACCACCGTACCAACATGGATAAGTACCACCCTGGTTACTTTGGTAAGGTTGGTTTCAGACATTTCCATACCATCCCCAACCGCAGCTGGAGACCAGTTCTTAACATCGACCGCCTTTGGTCTTTGATTGCCGCCGACGAGCGCGAGCAGTTCCTCAGCAACCCCAACGCCTCTGCTGCTCCCGTTATCGATACCTTGGCTGCCGGCTACGGTAAGGTTCTCGGCAAGGGTCTGCTCCCCAAGGTTCCTGTTATTGTCCGTGCCAGATTCGTTTCTGAGCTC…	ATGCCTACCCGCTTTTCAAAGACAAGAAAGAGCCGTGGTAACGTTTCCGCCGGTTACGGTCGTATCGGAAAGCACCGCAAGAGCTCCGGTGGTCGTGGTATGGCCGGTGGTCAGCACCACCACCGTACCAACATGGATAAGTACCACCCTGGTTACTTTGGTAAGGTTGGTTTCAGACATTTCCATACCATCCCCAACCGCAGCTGGAGACCAGTTCTTAACATCGACCGCCTTTGGTCTTTGATTGCCGCCGACGAGCGCGAGCAGTTCCTCAGCAACCCCAACGCCTCTGCTGCTCCCGTTATCGATACCTTGGCTGCCGGCTACGGTAAGGTTCTCGGCAAGGGTCTGCTCCCCAAGGTTCCTGTTATTGTCCGTGCCAGATTCGTTTCTGAGCTC…	OK	450	YES	CAG	Glutamine	Glutamine (CAG)
yHMPu5000035278_tortispora_phaffii_170713_g004861.m1	ATGCCTACCCGATTTAAGAAGACCCGCACTCTTCGCGGCCACGTTTCTCACGGTAAAGGTCGTGTTGGCAAGCACCGCAAACATCCCGGTGGTCGGGGTAACGCCGGTGGTTTGACTCACCATCGCTCCAACCTCGATCTGTTCCATCCCGGTTACTTTGGAAAGGTCGGTATGCGCACGTTCCACATGCAGCCCAACCACCACTGGAAGCCCACCATCAACATCGACAAGCTTTGGTCCTTGGTTGACTCCACCAAGCGCGACGAGCTCCTCAAGACCGCCTCTGCCGACGCTGCTCCGGTCATCGATACTTTGTCGCACGGATACGCCAAGGTTCTGGGCAAAGGCCGTCTTCCCTCTGTTCCTGTTATTGTTAAAGCCCGCTATGTCTCCAAGCTT…	ATGCCTACCCGATTTAAGAAGACCCGCACTCTTCGCGGCCACGTTTCTCACGGTAAAGGTCGTGTTGGCAAGCACCGCAAACATCCCGGTGGTCGGGGTAACGCCGGTGGTTTGACTCACCATCGCTCCAACCTCGATCTGTTCCATCCCGGTTACTTTGGAAAGGTCGGTATGCGCACGTTCCACATGCAGCCCAACCACCACTGGAAGCCCACCATCAACATCGACAAGCTTTGGTCCTTGGTTGACTCCACCAAGCGCGACGAGCTCCTCAAGACCGCCTCTGCCGACGCTGCTCCGGTCATCGATACTTTGTCGCACGGATACGCCAAGGTTCTGGGCAAAGGCCGTCTTCCCTCTGTTCCTGTTATTGTTAAAGCCCGCTATGTCTCCAAGCTT…	OK	450	YES	TTG	Leucine2	Leucine2 (TTG)
yHMPu5000035633_candida_hispaniensis_180604.g002633.m1	ATGCCTACCCGATTCAGCAAGACCCGAAAGCACAGAGGCCACGTTTCCGCCGGTTACGGTCGTATCGGCAAGCACCGAAAGAATCCTGGTGGTCGAGGTATGGCTGGTGGTCTCCACCACCACCGAACCAACATGGATAAGTACCATCCTGGTTACTTTGGAAAGGTCGGTATGCGATACTTCCACAAGCAAAAGAACCATTTCTGGCGACCTACCATCAATGTTGAGAAGCTCTGGACTCTTGTCCCTGAGGAGAAGCGAGACTCTTACCTCGAGTCTGCTTCTGAGTCTGCTGCTCCCGTCATTGATACCCTTGCTCATGGTTATGGCAAGGTTCTTGGTAAGGGCCAGCTCCCCAAGGTTCCTGTCATTGTCAAGGCTCGATTTGTTTCCAAGCTT…	ATGCCTACCCGATTCAGCAAGACCCGAAAGCACAGAGGCCACGTTTCCGCCGGTTACGGTCGTATCGGCAAGCACCGAAAGAATCCTGGTGGTCGAGGTATGGCTGGTGGTCTCCACCACCACCGAACCAACATGGATAAGTACCATCCTGGTTACTTTGGAAAGGTCGGTATGCGATACTTCCACAAGCAAAAGAACCATTTCTGGCGACCTACCATCAATGTTGAGAAGCTCTGGACTCTTGTCCCTGAGGAGAAGCGAGACTCTTACCTCGAGTCTGCTTCTGAGTCTGCTGCTCCCGTCATTGATACCCTTGCTCATGGTTATGGCAAGGTTCTTGGTAAGGGCCAGCTCCCCAAGGTTCCTGTCATTGTCAAGGCTCGATTTGTTTCCAAGCTT…	OK	450	YES	CTC	Leucine1	Leucine1 (CTC)
yHMPu5000035279_tortispora_starmeri_170307_g001855.m1	ATGCCTACCCGATTCAAAAAGACCCGTACCCTCCGCGGCCATGTTTCTCACGGTAAAGGACGTGTCGGCAAGCACCGCAAACACCCCGGTGGTCGCGGTAACGCTGGTGGTTTGACCCATCACCGCTCTAACCTCGATCTGTTCCATCCTGGTTACTTTGGAAAGGTCGGTATGCGTACCTTCCACATGCAGCCCAACCACAACTGGAAACCCACCATCAACATCGATAAGCTTTGGTCCCTGGTTGAGTCTAGCAAACGGGACGAGCTTCTGAAAACCGCTTCCGCTGATGCTGCTCCTGTCATCGACACCTTGTCTCACGGATACGCCAAGGTTTTGGGCAAAGGCCGTTTGCCCTCTGTCCCGGTTATTGTCAAGGCCCGCTACGTCTCCAAACTT…	ATGCCTACCCGATTCAAAAAGACCCGTACCCTCCGCGGCCATGTTTCTCACGGTAAAGGACGTGTCGGCAAGCACCGCAAACACCCCGGTGGTCGCGGTAACGCTGGTGGTTTGACCCATCACCGCTCTAACCTCGATCTGTTCCATCCTGGTTACTTTGGAAAGGTCGGTATGCGTACCTTCCACATGCAGCCCAACCACAACTGGAAACCCACCATCAACATCGATAAGCTTTGGTCCCTGGTTGAGTCTAGCAAACGGGACGAGCTTCTGAAAACCGCTTCCGCTGATGCTGCTCCTGTCATCGACACCTTGTCTCACGGATACGCCAAGGTTTTGGGCAAAGGCCGTTTGCCCTCTGTCCCGGTTATTGTCAAGGCCCGCTACGTCTCCAAACTT…	OK	450	YES	TTG	Leucine2	Leucine2 (TTG)
yHMPu5000034681_blastobotrys_americana_160519_g001363.m1	ATGCCTACCCGAGCCACTAAGACTAGAAAGCTCAGAGGAAACGTTTCCCACGGTCATGGCCGTATCGGAAAGCACAGAAAGCACCCCGGTGGTCGTGGTATGGCTGGTGGTCAGCACCATCACCGAACTAACCTCGATAAGTACCACCCAGGTTACTTCGGAAAGGTTGGTATGCGAACCTTCCACTTCCAGCGCAACCATGTTTGGCGACCAGTTCTGAACCTTGAAAAGCTGTGGACTCTTGTTCCTGCTGAATCCCGGGAGAAGTATCTCAGCTCTGCTTCTGCTTCTTCTGCCCCCGTCATCGATACTCTGGCTGCTGGATACGGAAAGGTCCTTGGAAAGGGACGATTGCCCCAGGTTCCTGTCATCGTTCGAGCTCGATTTGTATCTGAGCTT…	ATGCCTACCCGAGCCACTAAGACTAGAAAGCTCAGAGGAAACGTTTCCCACGGTCATGGCCGTATCGGAAAGCACAGAAAGCACCCCGGTGGTCGTGGTATGGCTGGTGGTCAGCACCATCACCGAACTAACCTCGATAAGTACCACCCAGGTTACTTCGGAAAGGTTGGTATGCGAACCTTCCACTTCCAGCGCAACCATGTTTGGCGACCAGTTCTGAACCTTGAAAAGCTGTGGACTCTTGTTCCTGCTGAATCCCGGGAGAAGTATCTCAGCTCTGCTTCTGCTTCTTCTGCCCCCGTCATCGATACTCTGGCTGCTGGATACGGAAAGGTCCTTGGAAAGGGACGATTGCCCCAGGTTCCTGTCATCGTTCGAGCTCGATTTGTATCTGAGCTT…	OK	450	YES	CAG	Glutamine	Glutamine (CAG)
yHMPu5000034689_blastobotrys_illinoisensiss_170307.g003846.m1	ATGCCTACCCGACTTAGCAAGACTCGAAAGCTCCGAGGCCACGTTTCCATGGGTGGTGGTCGTGTCGGTAAGAACCGAAAGCACCCCGGTGGTCGAGGTATGGCCGGTGGTCAGCACCACCACCGAACCAACTTGGATAAGTACCATCCAGGTTACTTTGGTAAGGTCGGTATGCGAACCTTCCACTACCAGAAGAACCACGACTGGAAGCCAATCATCAACCTGGACAAGTTGTGGACCCTCATCCCAGCCGAGCGACGAGAGCAGTACCTTGCCGCCCCATCTGCCGACAACGCCCCAGTCATTGACACCCTGAACGCTGGCTTTGGCAAGGTTCTCGGCAAGGGCCGAATTCCAAACGTCCCAGTCATCGTCCGAGCCCGATTCGTCTCTGCTCTT…	ATGCCTACCCGACTTAGCAAGACTCGAAAGCTCCGAGGCCACGTTTCCATGGGTGGTGGTCGTGTCGGTAAGAACCGAAAGCACCCCGGTGGTCGAGGTATGGCCGGTGGTCAGCACCACCACCGAACCAACTTGGATAAGTACCATCCAGGTTACTTTGGTAAGGTCGGTATGCGAACCTTCCACTACCAGAAGAACCACGACTGGAAGCCAATCATCAACCTGGACAAGTTGTGGACCCTCATCCCAGCCGAGCGACGAGAGCAGTACCTTGCCGCCCCATCTGCCGACAACGCCCCAGTCATTGACACCCTGAACGCTGGCTTTGGCAAGGTTCTCGGCAAGGGCCGAATTCCAAACGTCCCAGTCATCGTCCGAGCCCGATTCGTCTCTGCTCTT…	OK	450	YES	CAG	Glutamine	Glutamine (CAG)
yHMPu5000034676_blastobotrys_malaysiensis_190924.g008123.m1	ATGCCTACCCGACTTAGCAAGACTCGAAAGCTCCGAGGCCACGTCTCCATGGGTGGCGGTCGAGTCGGTAAGAACCGAAAGCACCCCGGTGGTCGAGGTATGGCCGGTGGTCAGCACCACCACCGAACCAACTTGGATAAGTACCACCCAGGTTACTTTGGTAAGGTTGGTATGCGAACCTTCCACTACCAGAAGAACCACGACTGGAAGCCAATCCTCAACTTGGACAAGCTGTGGACTCTTATCCCAGCTGAGCGACGAGAGCAGTACCTTGCCTCTCCATCTGCCGAGAACGCCCCAGTCATTGACACCCTGAACGCTGGCTTCGGCAAGGTTCTGGGCAAGGGCCGAATTCCAAACGTCCCAGTCATTGTCCGAGCCCGATTCGTCTCTGCTCTT…	ATGCCTACCCGACTTAGCAAGACTCGAAAGCTCCGAGGCCACGTCTCCATGGGTGGCGGTCGAGTCGGTAAGAACCGAAAGCACCCCGGTGGTCGAGGTATGGCCGGTGGTCAGCACCACCACCGAACCAACTTGGATAAGTACCACCCAGGTTACTTTGGTAAGGTTGGTATGCGAACCTTCCACTACCAGAAGAACCACGACTGGAAGCCAATCCTCAACTTGGACAAGCTGTGGACTCTTATCCCAGCTGAGCGACGAGAGCAGTACCTTGCCTCTCCATCTGCCGAGAACGCCCCAGTCATTGACACCCTGAACGCTGGCTTCGGCAAGGTTCTGGGCAAGGGCCGAATTCCAAACGTCCCAGTCATTGTCCGAGCCCGATTCGTCTCTGCTCTT…	OK	450	YES	CAG	Glutamine	Glutamine (CAG)
yHMPu5000034675_blastobotrys_mokoenaii_160519.g003113.m1	ATGCCTACCCGACTTAGCAAGACTCGAAAGCTCAGAGGCCACGTTTCCATGGGTGGTGGTCGAGTCGGTAAGAACCGAAAGCACCCCGGTGGTCGAGGTATGGCCGGTGGTCAGCACCACCACCGAACCAACTTGGATAAGTTCCACCCAGGTTACTTTGGTAAGGTTGGTATGCGAACCTTCCACTACCAGAAGAACCACGACTGGAAGCCAATCATCAACTTGGACAAGTTGTGGACCCTCATCCCAGCCGAGCGACGAGAGAAGTACCTTGCCGCTCCATCTGCCGACAACGCCCCAGTCATTGACACTCTGAACGCTGGCTATGGCAAGGTTCTTGGCAAGGGCCGAATTCCAGACGTGCCAGTCATTGTGCGAGCCCGATTTGTCTCTGCTCTT…	ATGCCTACCCGACTTAGCAAGACTCGAAAGCTCAGAGGCCACGTTTCCATGGGTGGTGGTCGAGTCGGTAAGAACCGAAAGCACCCCGGTGGTCGAGGTATGGCCGGTGGTCAGCACCACCACCGAACCAACTTGGATAAGTTCCACCCAGGTTACTTTGGTAAGGTTGGTATGCGAACCTTCCACTACCAGAAGAACCACGACTGGAAGCCAATCATCAACTTGGACAAGTTGTGGACCCTCATCCCAGCCGAGCGACGAGAGAAGTACCTTGCCGCTCCATCTGCCGACAACGCCCCAGTCATTGACACTCTGAACGCTGGCTATGGCAAGGTTCTTGGCAAGGGCCGAATTCCAGACGTGCCAGTCATTGTGCGAGCCCGATTTGTCTCTGCTCTT…	OK	450	YES	CAG	Glutamine	Glutamine (CAG)
yHMPu5000037233_trichomonascus_vanleenenianus_210210_g001793.m1	ATGCCTACCCGACTTAGCAAGACCCGAAAGCTCAGAGGCCACGTCTCCATGGGTGGCGGACGTGTCGGTAAGAACCGAAAGCACCCCGGTGGTCGAGGTATGGCCGGTGGTCAGCACCACCACCGAACCAACTTGGATAAGTTCCACCCTGGTTACTTCGGTAAGGTTGGTATGCGAACCTTCCACTACCAGAAGAACCACGACTGGAAGCCAATCCTCAACCTGGACAAGCTGTGGACTCTCATCCCAGCTGAGCGACGAGAGCAGTACCTTGCCTCCCCATCTGCTGAGAACGCCCCAGTCATTGACACCCTGAACGCTGGCTTCGGCAAGGTTCTTGGCAAGGGCCGAATTCCAAACGTCCCAGTCATTGTCCGAGCCCGATTCGTCTCTGCTCTT…	ATGCCTACCCGACTTAGCAAGACCCGAAAGCTCAGAGGCCACGTCTCCATGGGTGGCGGACGTGTCGGTAAGAACCGAAAGCACCCCGGTGGTCGAGGTATGGCCGGTGGTCAGCACCACCACCGAACCAACTTGGATAAGTTCCACCCTGGTTACTTCGGTAAGGTTGGTATGCGAACCTTCCACTACCAGAAGAACCACGACTGGAAGCCAATCCTCAACCTGGACAAGCTGTGGACTCTCATCCCAGCTGAGCGACGAGAGCAGTACCTTGCCTCCCCATCTGCTGAGAACGCCCCAGTCATTGACACCCTGAACGCTGGCTTCGGCAAGGTTCTTGGCAAGGGCCGAATTCCAAACGTCCCAGTCATTGTCCGAGCCCGATTCGTCTCTGCTCTT…	OK	450	YES	CAG	Glutamine	Glutamine (CAG)
yHMPu5000035719_candida_blankii_190924.g002168.m1	ATGCCTACCCGAAGCACCAAGACCAGAAAGCTCAGAGGCCACGTTTCGGCCGGCCACGGTCGCATTGGCAAGCACAGAAAGCACCCCGGTGGTCGTGGTATGGCCGGTGGTCAGCACCACCACCGAACCAACCTTGACAAGTACCACCCTGGTTACTTCGGTAAGGTCGGTATGCGATACTTCCACCGTCAGTCGAACCACTTCTGGCGCCCGGTTCTGAACCTCGACAAGCTGTGGACTCTTGTCCCGGCCGAGAACCGTGAGAAGTACCTCTCGTCGGCCTCGGAGTCTGCTGCTCCTGTCATTGACACCCTTGCCCACGGTTACGGCAAGGTTCTCGGCAAGGGTGACCTCCCCAAGGTTCCCGTCATTGTTCGCGCTCGCTTTGTCTCGAAGCTC…	ATGCCTACCCGAAGCACCAAGACCAGAAAGCTCAGAGGCCACGTTTCGGCCGGCCACGGTCGCATTGGCAAGCACAGAAAGCACCCCGGTGGTCGTGGTATGGCCGGTGGTCAGCACCACCACCGAACCAACCTTGACAAGTACCACCCTGGTTACTTCGGTAAGGTCGGTATGCGATACTTCCACCGTCAGTCGAACCACTTCTGGCGCCCGGTTCTGAACCTCGACAAGCTGTGGACTCTTGTCCCGGCCGAGAACCGTGAGAAGTACCTCTCGTCGGCCTCGGAGTCTGCTGCTCCTGTCATTGACACCCTTGCCCACGGTTACGGCAAGGTTCTCGGCAAGGGTGACCTCCCCAAGGTTCCCGTCATTGTTCGCGCTCGCTTTGTCTCGAAGCTC…	OK	450	YES	CAG	Glutamine	Glutamine (CAG)
yHMPu5000026105_candida_digboiensis_210210_SPADES.haplomerger2.g000111.m1	ATGCCTACCCGAAACACTAAGACCAGAAAGCTCAGAGGCCACGTGTCTGCCGGTCACGGTCGTATTGGCAAGCACAGAAAGCACCCCGGTGGTCGGGGTATGGCTGGTGGTCAGCACCACCACCGAACCAACCTTGACAAGTACCACCCTGGTTACTTCGGTAAGGTCGGTATGCGATACTTTCACCTGCAGCGCAACCAATTCTGGCGCCCAGTTCTGAACCTTGATAAGCTGTGGGCTCTTGTCCCGGAGGAGAGCCGTGAGAAGTACCTCTCGTCGGCCTCTGAGTCGGCTGCTCCTGTCATCGACACTCTTGCCCACGGCTATGGAAAGGTTCTTGGCAAGGGTTCGCTTCCTAAGGTTCCCGTCATTGTTCGTGCCCGATTCGTCTCGAAGCTC…	ATGCCTACCCGAAACACTAAGACCAGAAAGCTCAGAGGCCACGTGTCTGCCGGTCACGGTCGTATTGGCAAGCACAGAAAGCACCCCGGTGGTCGGGGTATGGCTGGTGGTCAGCACCACCACCGAACCAACCTTGACAAGTACCACCCTGGTTACTTCGGTAAGGTCGGTATGCGATACTTTCACCTGCAGCGCAACCAATTCTGGCGCCCAGTTCTGAACCTTGATAAGCTGTGGGCTCTTGTCCCGGAGGAGAGCCGTGAGAAGTACCTCTCGTCGGCCTCTGAGTCGGCTGCTCCTGTCATCGACACTCTTGCCCACGGCTATGGAAAGGTTCTTGGCAAGGGTTCGCTTCCTAAGGTTCCCGTCATTGTTCGTGCCCGATTCGTCTCGAAGCTC…	OK	450	YES	CAG	Glutamine	Glutamine (CAG)
yHMPu5000026197_brettanomyces_custersianus_160519.g002271.m1	ATGCCTACCAGGTTCCGCAAGACTAGAAAGCACAGAGGAAACGTTACAGCCGGTTACGGTCGTATCGGTAAGCACAGAAAGCACCCCGGTGGACGTGGTATGGCCGGTGGTCAACATCACCACCGTATTGCCATGGATAAGTACCATCCAGGTTACTTCGGTAAGGTCGGTATGAGATACTTCCACAAGCAAGAAAACAGATACTGGAAGCCAGTTATCAACTTGAACAAGTTATGGTCTTTGGTTGAAAACAAGGATGAGAAATTGTCTAAGTCTACCAAGGATTCTGCTGTTGTTATTGACACTTTGGCTCATGGTTATGGTAAGGTTTTGGGTGCTGGTAAGCTCCCAGAAGTGCCAGTTATCGTTAAGGCCAGATATGTCTCTAAGTTGGCAGAG…	ATGCCTACCAGGTTCCGCAAGACTAGAAAGCACAGAGGAAACGTTACAGCCGGTTACGGTCGTATCGGTAAGCACAGAAAGCACCCCGGTGGACGTGGTATGGCCGGTGGTCAACATCACCACCGTATTGCCATGGATAAGTACCATCCAGGTTACTTCGGTAAGGTCGGTATGAGATACTTCCACAAGCAAGAAAACAGATACTGGAAGCCAGTTATCAACTTGAACAAGTTATGGTCTTTGGTTGAAAACAAGGATGAGAAATTGTCTAAGTCTACCAAGGATTCTGCTGTTGTTATTGACACTTTGGCTCATGGTTATGGTAAGGTTTTGGGTGCTGGTAAGCTCCCAGAAGTGCCAGTTATCGTTAAGGCCAGATATGTCTCTAAGTTGGCAGAG…	OK	444	YES	CAA	Glutamine	Glutamine (CAA)
saprochaete_suaveolens_g005404.m1	ATGCCTACCAGATTTTCTAAGACCAGAAAGCATAGAGGACACGTTTCCGCCGGTTACGGTCGTATTGGCAAGCACCGCAAGAATCCCGGTGGTCGTGGTATGGCCGGTGGTCAGCACCACCACCGTACTAACCTCGACAAGTACCATCCCGGTTACTTCGGTAAGGTTGGTATGAGATACTTCCACAAGCAACAAAACCACTTCTGGAGACCCGTCATCAATGTCGAGAGCCTCTGGACTCTTGTTCCTGAAGAGAAGCGTGCTCAGTACTCCAAGGAAGCTTCTTCTTCTTCCGCCCCCGTTATCGACACTCTCGCTGCTGGTTACGGTAAGGTTCTCGGCAAGGGTTTCCTCCCCAAGATTCCCGTTATTGTTAAGGCTAGATTTGTTTCTGCTGAA…	ATGCCTACCAGATTTTCTAAGACCAGAAAGCATAGAGGACACGTTTCCGCCGGTTACGGTCGTATTGGCAAGCACCGCAAGAATCCCGGTGGTCGTGGTATGGCCGGTGGTCAGCACCACCACCGTACTAACCTCGACAAGTACCATCCCGGTTACTTCGGTAAGGTTGGTATGAGATACTTCCACAAGCAACAAAACCACTTCTGGAGACCCGTCATCAATGTCGAGAGCCTCTGGACTCTTGTTCCTGAAGAGAAGCGTGCTCAGTACTCCAAGGAAGCTTCTTCTTCTTCCGCCCCCGTTATCGACACTCTCGCTGCTGGTTACGGTAAGGTTCTCGGCAAGGGTTTCCTCCCCAAGATTCCCGTTATTGTTAAGGCTAGATTTGTTTCTGCTGAA…	OK	450	YES	CAG	Glutamine	Glutamine (CAG)
yHMPu5000041818_magnusiomyces_tetrasperma_170307.g008032.m1	ATGCCTACCAGATTTTCTAAGACCAGAAAGCACAGAGGACACGTTTCCGCCGGTTACGGTCGTATTGGCAAGCACCGCAAGAGTCCCGGTGGTCGTGGTATGGCCGGTGGTCAGCACCACCACCGTACCAACATGGACAAGTACCATCCCGGTTACTTTGGTAAGGTCGGTATGAGATACTTCCACAAGCAGCAGAACCACTTCTGGAGACCCGTCATCAACGTTGAGCGTCTCTGGACTTTGGTCCCTGAAGAGAAGCGTGATGAGTACATCAAGAACGCTTCTTCTTCTGCTGCCCCCGTTATCGACACTCTCGCTGCTGGTTACGGTAAGGTTCTTGGCAAGGGTTTCCTCCCCAAGATCCCCGTCATTGTCAAGGCTAGATTCGTTTCTGCCGAG…	ATGCCTACCAGATTTTCTAAGACCAGAAAGCACAGAGGACACGTTTCCGCCGGTTACGGTCGTATTGGCAAGCACCGCAAGAGTCCCGGTGGTCGTGGTATGGCCGGTGGTCAGCACCACCACCGTACCAACATGGACAAGTACCATCCCGGTTACTTTGGTAAGGTCGGTATGAGATACTTCCACAAGCAGCAGAACCACTTCTGGAGACCCGTCATCAACGTTGAGCGTCTCTGGACTTTGGTCCCTGAAGAGAAGCGTGATGAGTACATCAAGAACGCTTCTTCTTCTGCTGCCCCCGTTATCGACACTCTCGCTGCTGGTTACGGTAAGGTTCTTGGCAAGGGTTTCCTCCCCAAGATCCCCGTCATTGTCAAGGCTAGATTCGTTTCTGCCGAG…	OK	450	YES	CAG	Glutamine	Glutamine (CAG)
yHMPu5000035676_komagataella_kurtzmanii_160613_g004286.m1	ATGCCTACCAGATTTTCAGCAACCAGAAAGCACAGAGGTAATGTCTCTGCCGGTAAAGGTCGTGTTGGTAAGCACAGAAAGCATCCCGGTGGTCGTGGTAAGGCTGGTGGTCAACACCACCACAGAACCAACATGGACAAGTACCATCCAGGTTACTTCGGAAAGGTTGGTATGAGACACTTCCGTTTACAACAAGCTCGTTACTGGCGCCCAGTAATTAACATCCAGAACTTGTGGTCTTTGATTCCTGAAGAGAAGAGAGAAGATGCTTTGAAGAACTCTTCTGCTTCTTCTGCCGTCGTTATTGACACTTTGGCCAACGGTTATGGTAAGGTCCTTGGTAAGGGTTCTTTGCCAAACATCCCAATTATCGTCAAGGCTAGATTTGTTTCCAAGGAG…	ATGCCTACCAGATTTTCAGCAACCAGAAAGCACAGAGGTAATGTCTCTGCCGGTAAAGGTCGTGTTGGTAAGCACAGAAAGCATCCCGGTGGTCGTGGTAAGGCTGGTGGTCAACACCACCACAGAACCAACATGGACAAGTACCATCCAGGTTACTTCGGAAAGGTTGGTATGAGACACTTCCGTTTACAACAAGCTCGTTACTGGCGCCCAGTAATTAACATCCAGAACTTGTGGTCTTTGATTCCTGAAGAGAAGAGAGAAGATGCTTTGAAGAACTCTTCTGCTTCTTCTGCCGTCGTTATTGACACTTTGGCCAACGGTTATGGTAAGGTCCTTGGTAAGGGTTCTTTGCCAAACATCCCAATTATCGTCAAGGCTAGATTTGTTTCCAAGGAG…	OK	450	YES	CAA	Glutamine	Glutamine (CAA)
yHMPu5000034938_Komagataella_ulmi_SPAdes_g004935.m1	ATGCCTACCAGATTTTCAGCAACCAGAAAGCACAGAGGTAACGTCTCTGCCGGTAAAGGTCGTGTTGGTAAGCACAGAAAGCATCCCGGTGGTCGTGGTAAGGCTGGTGGTCAACACCACCACAGAACCAACATGGACAAGTACCATCCAGGTTACTTCGGAAAGGTTGGTATGAGACACTTCCGTTTACAACAAGCTCGTTACTGGCGTCCAGTAGTTAACATTCAGAACTTGTGGTCTTTGATTCCTGAAGAGAAGAGAGAAGATGCTTTGAAGAACTCTTCTGCTTCTTCTGCCGTAGTTATTGACACTTTGGCCAACGGTTATGGTAAGGTCCTTGGTAAGGGTTCTTTGCCAAACATCCCGATTATTGTCAAGGCCAGATTTGTCTCCAAGGAG…	ATGCCTACCAGATTTTCAGCAACCAGAAAGCACAGAGGTAACGTCTCTGCCGGTAAAGGTCGTGTTGGTAAGCACAGAAAGCATCCCGGTGGTCGTGGTAAGGCTGGTGGTCAACACCACCACAGAACCAACATGGACAAGTACCATCCAGGTTACTTCGGAAAGGTTGGTATGAGACACTTCCGTTTACAACAAGCTCGTTACTGGCGTCCAGTAGTTAACATTCAGAACTTGTGGTCTTTGATTCCTGAAGAGAAGAGAGAAGATGCTTTGAAGAACTCTTCTGCTTCTTCTGCCGTAGTTATTGACACTTTGGCCAACGGTTATGGTAAGGTCCTTGGTAAGGGTTCTTTGCCAAACATCCCGATTATTGTCAAGGCCAGATTTGTCTCCAAGGAG…	OK	450	YES	CAA	Glutamine	Glutamine (CAA)
komagataella_pastoris_g002734.m1	ATGCCTACCAGATTTTCAGCAACCAGAAAGCACAGAGGTAACGTCTCTGCCGGTAAAGGTCGTGTTGGTAAGCACAGAAAGCATCCCGGTGGTCGTGGTAAGGCTGGTGGTCAACACCACCACAGAACCAACATGGACAAGTACCATCCAGGTTACTTCGGAAAGGTTGGTATGAGACACTTCCGTTTACAACAAGCTCGTTACTGGCGTCCAGTAGTTAACATCCAGAACTTATGGTCTTTGATTCCTGAAGAGAAGAGAGAAGATGCTTTGAAGAACTCTTCTTCTTCTTCTGCCGTAGTTATTGACACTTTGGCCAACGGTTATGGTAAGGTCCTTGGTAAGGGTTCTTTGCCAAACATCCCAATTATCGTCAAGGCTAGATTTGTCTCCAAGGAG…	ATGCCTACCAGATTTTCAGCAACCAGAAAGCACAGAGGTAACGTCTCTGCCGGTAAAGGTCGTGTTGGTAAGCACAGAAAGCATCCCGGTGGTCGTGGTAAGGCTGGTGGTCAACACCACCACAGAACCAACATGGACAAGTACCATCCAGGTTACTTCGGAAAGGTTGGTATGAGACACTTCCGTTTACAACAAGCTCGTTACTGGCGTCCAGTAGTTAACATCCAGAACTTATGGTCTTTGATTCCTGAAGAGAAGAGAGAAGATGCTTTGAAGAACTCTTCTTCTTCTTCTGCCGTAGTTATTGACACTTTGGCCAACGGTTATGGTAAGGTCCTTGGTAAGGGTTCTTTGCCAAACATCCCAATTATCGTCAAGGCTAGATTTGTCTCCAAGGAG…	OK	450	YES	CAA	Glutamine	Glutamine (CAA)
yHMPu5000034953_komagataella_pastoris_160519_g001181.m1	ATGCCTACCAGATTTTCAGCAACCAGAAAGCACAGAGGTAACGTCTCTGCCGGTAAAGGTCGTGTTGGTAAGCACAGAAAGCATCCCGGTGGTCGTGGTAAGGCTGGTGGTCAACACCACCACAGAACCAACATGGACAAGTACCATCCAGGTTACTTCGGAAAGGTTGGTATGAGACACTTCCGTTTACAACAAGCTCGTTACTGGCGTCCAGTAGTTAACATCCAGAACTTATGGTCTTTGATTCCTGAAGAGAAGAGAGAAGATGCTTTGAAGAACTCTTCTTCTTCTTCTGCCGTAGTTATTGACACTTTGGCCAACGGTTATGGTAAGGTCCTTGGTAAGGGTTCTTTGCCAAACATCCCAATTATCGTCAAGGCTAGATTTGTCTCCAAGGAG…	ATGCCTACCAGATTTTCAGCAACCAGAAAGCACAGAGGTAACGTCTCTGCCGGTAAAGGTCGTGTTGGTAAGCACAGAAAGCATCCCGGTGGTCGTGGTAAGGCTGGTGGTCAACACCACCACAGAACCAACATGGACAAGTACCATCCAGGTTACTTCGGAAAGGTTGGTATGAGACACTTCCGTTTACAACAAGCTCGTTACTGGCGTCCAGTAGTTAACATCCAGAACTTATGGTCTTTGATTCCTGAAGAGAAGAGAGAAGATGCTTTGAAGAACTCTTCTTCTTCTTCTGCCGTAGTTATTGACACTTTGGCCAACGGTTATGGTAAGGTCCTTGGTAAGGGTTCTTTGCCAAACATCCCAATTATCGTCAAGGCTAGATTTGTCTCCAAGGAG…	OK	450	YES	CAA	Glutamine	Glutamine (CAA)
yHMPu5000026274_komagataella_populi_160519_g005015.m1	ATGCCTACCAGATTTTCAGCAACCAGAAAGCACAGAGGTAACGTCTCTGCCGGTAAAGGTCGTGTTGGTAAGCACAGAAAGCATCCCGGTGGTCGTGGTAAGGCCGGTGGTCAACACCACCACAGAACCAACATGGATAAGTACCATCCAGGTTACTTTGGAAAGGTTGGTATGAGACACTTCCGTTTACAGAAAGCTCGTTACTGGCGCCCAGTTATTAATATCCAGAGCCTGTGGTCTTTGATTCCTGAAGAGAACAGAGAAGATGCTTTGAAGAACTCCTCTGCTTCTTCTGCTGTAGTTATCGACACTTTGGCCAACGGTTACGGTAAGGTTCTTGGTAAGGGTTCTTTGCCAAACATCCCAATTATCGTCAAGGCTAGATTTGTTTCCAAGGAA…	ATGCCTACCAGATTTTCAGCAACCAGAAAGCACAGAGGTAACGTCTCTGCCGGTAAAGGTCGTGTTGGTAAGCACAGAAAGCATCCCGGTGGTCGTGGTAAGGCCGGTGGTCAACACCACCACAGAACCAACATGGATAAGTACCATCCAGGTTACTTTGGAAAGGTTGGTATGAGACACTTCCGTTTACAGAAAGCTCGTTACTGGCGCCCAGTTATTAATATCCAGAGCCTGTGGTCTTTGATTCCTGAAGAGAACAGAGAAGATGCTTTGAAGAACTCCTCTGCTTCTTCTGCTGTAGTTATCGACACTTTGGCCAACGGTTACGGTAAGGTTCTTGGTAAGGGTTCTTTGCCAAACATCCCAATTATCGTCAAGGCTAGATTTGTTTCCAAGGAA…	OK	450	YES	CAA	Glutamine	Glutamine (CAA)
yHMPu5000034939_komagataella_pseudopastoris_160519_g001409.m1	ATGCCTACCAGATTTTCAGCAACCAGAAAGCACAGAGGTAACGTCTCTGCCGGTAAAGGTCGTGTTGGTAAGCACAGAAAGCATCCCGGTGGTCGTGGTAAGGCCGGTGGTCAACACCACCACAGAACCAACATGGATAAGTACCATCCAGGTTACTTTGGAAAGGTTGGTATGAGACACTTCCGTTTACAGAAAGCTCGTTACTGGCGCCCAGTTATTAATATCCAGAGCCTGTGGTCTTTGATTCCTGAAGAGAACAGAGAAGATGCTTTGAAGAACTCCTCTGCTTCTTCTGCTGTAGTTATCGACACTTTGGCCAACGGTTACGGTAAGGTCCTTGGTAAGGGTTCTTTGCCAAACATCCCAATTATCGTCAAGGCTAGATTTGTTTCCAAGGAA…	ATGCCTACCAGATTTTCAGCAACCAGAAAGCACAGAGGTAACGTCTCTGCCGGTAAAGGTCGTGTTGGTAAGCACAGAAAGCATCCCGGTGGTCGTGGTAAGGCCGGTGGTCAACACCACCACAGAACCAACATGGATAAGTACCATCCAGGTTACTTTGGAAAGGTTGGTATGAGACACTTCCGTTTACAGAAAGCTCGTTACTGGCGCCCAGTTATTAATATCCAGAGCCTGTGGTCTTTGATTCCTGAAGAGAACAGAGAAGATGCTTTGAAGAACTCCTCTGCTTCTTCTGCTGTAGTTATCGACACTTTGGCCAACGGTTACGGTAAGGTCCTTGGTAAGGGTTCTTTGCCAAACATCCCAATTATCGTCAAGGCTAGATTTGTTTCCAAGGAA…	OK	450	YES	CAA	Glutamine	Glutamine (CAA)
yHMPu5000037220_komagataella_mondaviorum_210210_g004542.m1	ATGCCTACCAGATTTTCAGCAACCAGAAAGCACAGAGGTAACGTCTCTGCCGGTAAAGGTCGTGTTGGTAAGCACAGAAAGCATCCCGGTGGTCGTGGTAAGGCCGGTGGTCAACACCACCACAGAACCAACATGGATAAGTACCATCCAGGTTACTTTGGAAAGGTTGGTATGAGACACTTCCGTTTACAGAAAGCTCGTTACTGGCGCCCAGTTATTAATATCCAGAGCCTGTGGTCTTTGATTCCTGAAGAGAACAGAGAAGATGCTTTGAAGAACTCTTCTGCTTCTTCTGCTGTAGTTATCGACACTTTGGCCAACGGTTACGGTAAGGTCCTTGGTAAAGGTTCTTTGCCAAACATTCCAATTATCGTCAAGGCTAGATTTGTTTCCAAGGAA…	ATGCCTACCAGATTTTCAGCAACCAGAAAGCACAGAGGTAACGTCTCTGCCGGTAAAGGTCGTGTTGGTAAGCACAGAAAGCATCCCGGTGGTCGTGGTAAGGCCGGTGGTCAACACCACCACAGAACCAACATGGATAAGTACCATCCAGGTTACTTTGGAAAGGTTGGTATGAGACACTTCCGTTTACAGAAAGCTCGTTACTGGCGCCCAGTTATTAATATCCAGAGCCTGTGGTCTTTGATTCCTGAAGAGAACAGAGAAGATGCTTTGAAGAACTCTTCTGCTTCTTCTGCTGTAGTTATCGACACTTTGGCCAACGGTTACGGTAAGGTCCTTGGTAAAGGTTCTTTGCCAAACATTCCAATTATCGTCAAGGCTAGATTTGTTTCCAAGGAA…	OK	450	YES	CAA	Glutamine	Glutamine (CAA)
yHDO565_zygosaccharomyces_gambellarensis_180604.g001340.m1	ATGCCTACCAGATTTTCACACAACAGAAAGCACAGAGGTCACATCTCAGCCGGTCACGGTCGTGTTGGTAAGCACAGAAAGCACCCTGGTGGTAAGGGTATGGCTGGTGGTCAACACCACCACAGAACCAACTTGGATAAATACCACCCAGGTTACTTCGGTAAAGTTGGTATGAGATACTTCCGTAAGCAACCACACCACTTCTGGAGACCAGTTTTGAACCTGGACAAGTTGTGGACTTTGCTACCTGAGCAAAAGAGAGAACACTACTTGAAGGCTTCCTCTAAATCTTCTGCCCCAGTCATTGACACTTTGGCTGCTGGTTACGGTAAGGTTTTGGGTAAGGGCAGAATCCCAAGCGTTCCAGTTATCGTCAAGGCTAGATTTGTTTCCAAATTA…	ATGCCTACCAGATTTTCACACAACAGAAAGCACAGAGGTCACATCTCAGCCGGTCACGGTCGTGTTGGTAAGCACAGAAAGCACCCTGGTGGTAAGGGTATGGCTGGTGGTCAACACCACCACAGAACCAACTTGGATAAATACCACCCAGGTTACTTCGGTAAAGTTGGTATGAGATACTTCCGTAAGCAACCACACCACTTCTGGAGACCAGTTTTGAACCTGGACAAGTTGTGGACTTTGCTACCTGAGCAAAAGAGAGAACACTACTTGAAGGCTTCCTCTAAATCTTCTGCCCCAGTCATTGACACTTTGGCTGCTGGTTACGGTAAGGTTTTGGGTAAGGGCAGAATCCCAAGCGTTCCAGTTATCGTCAAGGCTAGATTTGTTTCCAAATTA…	OK	450	YES	CAA	Glutamine	Glutamine (CAA)
yHMPu5000041818_magnusiomyces_tetrasperma_170307.g007751.m1	ATGCCTACCAGATTTTCAAAGACTAGAAAGCATAGAGGACACGTTTCTGCCGGTTACGGTCGTATTGGCAAGCACCGCAAGAGTCCCGGTGGTCGTGGTATGGCCGGTGGTCAGCACCACCACCGTACCAACATGGACAAGTACCATCCCGGTTACTTTGGTAAGGTCGGTATGAGATACTTCCACAAGCAGCAGAACCACTTCTGGAGACCCGTCATCAACGTTGAGCGTCTCTGGACTTTGGTCCCTGAAGAGAAGCGTGATGAGTACATCAAGAACGCTTCTTCTTCTGCTGCCCCCGTTATCGACACTCTCGCTGCTGGTTACGGTAAGGTTCTTGGTAAGGGTTTCCTCCCCAAGATCCCCGTCATTGTCAAGGCTAGATTCGTTTCTGCCGAG…	ATGCCTACCAGATTTTCAAAGACTAGAAAGCATAGAGGACACGTTTCTGCCGGTTACGGTCGTATTGGCAAGCACCGCAAGAGTCCCGGTGGTCGTGGTATGGCCGGTGGTCAGCACCACCACCGTACCAACATGGACAAGTACCATCCCGGTTACTTTGGTAAGGTCGGTATGAGATACTTCCACAAGCAGCAGAACCACTTCTGGAGACCCGTCATCAACGTTGAGCGTCTCTGGACTTTGGTCCCTGAAGAGAAGCGTGATGAGTACATCAAGAACGCTTCTTCTTCTGCTGCCCCCGTTATCGACACTCTCGCTGCTGGTTACGGTAAGGTTCTTGGTAAGGGTTTCCTCCCCAAGATCCCCGTCATTGTCAAGGCTAGATTCGTTTCTGCCGAG…	OK	450	YES	CAG	Glutamine	Glutamine (CAG)
yHDO581_magnusiomyces_capitatus_190924.g006429.m1	ATGCCTACCAGATTTTCAAAGACTAGAAAGCATAGAGGACACGTTTCCGCCGGTTACGGTCGTATTGGCAAGCACCGCAAGAATCCCGGTGGTCGTGGTATGGCCGGTGGTCAACACCATCATCGTACCAATCTCGACAAATACCATCCAGGTTACTTCGGTAAGGTTGGTATGAGATACTTCCACAAGCAACAAAACCACTTCTGGAGACCAGTCATCAACGTTGAAAGACTCTGGTCTTTGATCCCAGAAGAAAAGAGAGAAAAGTACCTTAAGGAAGCCTCCCCAAGCTCTGCCCCAGTCATTGACACTCTTGCTGCTGGTTACGGAAAGGTTTTGGGTAAGGGTGCTATCCCAAATGTCCCAGTTATTGTTAAGGCCAGATTTGTCTCTGCTGAA…	ATGCCTACCAGATTTTCAAAGACTAGAAAGCATAGAGGACACGTTTCCGCCGGTTACGGTCGTATTGGCAAGCACCGCAAGAATCCCGGTGGTCGTGGTATGGCCGGTGGTCAACACCATCATCGTACCAATCTCGACAAATACCATCCAGGTTACTTCGGTAAGGTTGGTATGAGATACTTCCACAAGCAACAAAACCACTTCTGGAGACCAGTCATCAACGTTGAAAGACTCTGGTCTTTGATCCCAGAAGAAAAGAGAGAAAAGTACCTTAAGGAAGCCTCCCCAAGCTCTGCCCCAGTCATTGACACTCTTGCTGCTGGTTACGGAAAGGTTTTGGGTAAGGGTGCTATCCCAAATGTCCCAGTTATTGTTAAGGCCAGATTTGTCTCTGCTGAA…	OK	450	YES	CAA	Glutamine	Glutamine (CAA)
saprochaete_clavata_g002927.m1	ATGCCTACCAGATTTTCAAAGACTAGAAAGCATAGAGGACACGTTTCCGCCGGTTACGGTCGTATTGGCAAGCACCGCAAGAATCCCGGTGGTCGTGGTATGGCCGGTGGTCAACACCACCATCGTACCAATCTCGACAAATACCATCCAGGTTACTTCGGTAAGGTTGGTATGAGATACTTCCACAAGCAACAAAATCACTTCTGGAGACCAGTCATTAACGTTGAAAGACTCTGGTCTTTGATCCCAGAAGAAAAGAGAGAAAAGTACCTTAAGGAAGCCTCCCCAAGCTCTGCTCCAGTTATTGACACTCTTGCTGCTGGTTTTGGAAAGGTTTTGGGTAAGGGATCTCTCCCAAATGTCCCAGTTATTGTTAAGGCTAGATTTGTTTCTGCTGAA…	ATGCCTACCAGATTTTCAAAGACTAGAAAGCATAGAGGACACGTTTCCGCCGGTTACGGTCGTATTGGCAAGCACCGCAAGAATCCCGGTGGTCGTGGTATGGCCGGTGGTCAACACCACCATCGTACCAATCTCGACAAATACCATCCAGGTTACTTCGGTAAGGTTGGTATGAGATACTTCCACAAGCAACAAAATCACTTCTGGAGACCAGTCATTAACGTTGAAAGACTCTGGTCTTTGATCCCAGAAGAAAAGAGAGAAAAGTACCTTAAGGAAGCCTCCCCAAGCTCTGCTCCAGTTATTGACACTCTTGCTGCTGGTTTTGGAAAGGTTTTGGGTAAGGGATCTCTCCCAAATGTCCCAGTTATTGTTAAGGCTAGATTTGTTTCTGCTGAA…	OK	450	YES	CAA	Glutamine	Glutamine (CAA)
yHMPu5000034630_Magnusiomyces_magnusii_S134_MASURCA.haplomerger2.g006462.m1	ATGCCTACCAGATTTTCAAAGACCAGAAAGCATAGAGGACACGTTTCCGCCGGTTACGGTCGTATTGGAAAGCACCGCAAGAATCCTGGTGGTCGTGGTATGGCCGGTGGTCAGCATCATCACCGTACTAACCTCGATAAGTACCATCCCGGTTACTTTGGTAAGGTTGGTATGAGATACTTCCACAAGCAACAAAACCACTTTTGGAGACCCGTCATTAATGTCGAAAGCCTTTGGACCCTTGTTCCTGAAGAAAAGCGGGATCAGTACGTCAAGGAGGCTTCTGCTTCTGCAGCTCCTGTTATTGACACCCTCGCTGCTGGCTACGGTAAGGTCCTTGGTAAGGGTTTCCTTCCTAAGATTCCTGTCATTGTCAAGGCTAGATTTGTTTCTGCTGAA…	ATGCCTACCAGATTTTCAAAGACCAGAAAGCATAGAGGACACGTTTCCGCCGGTTACGGTCGTATTGGAAAGCACCGCAAGAATCCTGGTGGTCGTGGTATGGCCGGTGGTCAGCATCATCACCGTACTAACCTCGATAAGTACCATCCCGGTTACTTTGGTAAGGTTGGTATGAGATACTTCCACAAGCAACAAAACCACTTTTGGAGACCCGTCATTAATGTCGAAAGCCTTTGGACCCTTGTTCCTGAAGAAAAGCGGGATCAGTACGTCAAGGAGGCTTCTGCTTCTGCAGCTCCTGTTATTGACACCCTCGCTGCTGGCTACGGTAAGGTCCTTGGTAAGGGTTTCCTTCCTAAGATTCCTGTCATTGTCAAGGCTAGATTTGTTTCTGCTGAA…	OK	450	YES	CAG	Glutamine	Glutamine (CAG)
yHMPu5000041819_magnusiomyces_starmeri_201018.g001680.m1	ATGCCTACCAGATTTTCAAAGACCAGAAAGCATAGAGGACACGTCTCCGCCGGTTACGGTCGTATTGGCAAGCACCGCAAGCATCCCGGTGGTCGTGGTATGGCCGGTGGTCAACATCACCACAGAACCAACCTCGATAAGTACCATCCCGGTTACTTTGGTAAGGTCGGTATGAGATACTTCCACAAGCAAAAGAACCACTTCTGGAAGCCCGTCATCAATGTCGAGCGTCTGTGGACTCTTGTCCCTGAAGAGAAGAGAGAGAAGTACCTTAAGGAATCTACCTCCGACGCTGCTCCTGTCATTGACACTCTCGCTGCTGGTTACGGTAAGGTCCTTGGTAAGGGTTCTCTTCCCAAAGTTCCCGTCATTGTCAAGGCCCGCTTTGTCTCTGCCGAA…	ATGCCTACCAGATTTTCAAAGACCAGAAAGCATAGAGGACACGTCTCCGCCGGTTACGGTCGTATTGGCAAGCACCGCAAGCATCCCGGTGGTCGTGGTATGGCCGGTGGTCAACATCACCACAGAACCAACCTCGATAAGTACCATCCCGGTTACTTTGGTAAGGTCGGTATGAGATACTTCCACAAGCAAAAGAACCACTTCTGGAAGCCCGTCATCAATGTCGAGCGTCTGTGGACTCTTGTCCCTGAAGAGAAGAGAGAGAAGTACCTTAAGGAATCTACCTCCGACGCTGCTCCTGTCATTGACACTCTCGCTGCTGGTTACGGTAAGGTCCTTGGTAAGGGTTCTCTTCCCAAAGTTCCCGTCATTGTCAAGGCCCGCTTTGTCTCTGCCGAA…	OK	450	YES	CAA	Glutamine	Glutamine (CAA)
yHMPu5000035277_candida_pararugosa_201018_g000769.m1	ATGCCTACCAGATTTAGCAAAACACGCAAGTCGCGTGGTCACGTCTCTGCCGGTTACGGTCGTATTGGAAAGCATCGCAAGTCTCCTGGTGGTCGTGGTATGGCCGGTGGTCAGCACCACCACCGCACTAACCTCGATAAGTACCACCCTGGTTACTTTGGTAAGGTTGGTTTCCGTCAGTTCCACCTTCTGCGCAACCGCGACTGGAAGCCCGTTGTTAACATTGACTCTCTCTGGGCCCTGATTCCCACCGAGGAGCGCGAGAGCTTCTTGGCCAAGCCTGATGCCAGCAACGCTCCCGTTATCGACACTCTCGCTGCTGGTTACGGTAAGGTTCTTGGTAAGGGTGTCCTTCCCGAGGTCCCTATCATCGTTCGTGCCCGCTTCGTCTCTTCTCTC…	ATGCCTACCAGATTTAGCAAAACACGCAAGTCGCGTGGTCACGTCTCTGCCGGTTACGGTCGTATTGGAAAGCATCGCAAGTCTCCTGGTGGTCGTGGTATGGCCGGTGGTCAGCACCACCACCGCACTAACCTCGATAAGTACCACCCTGGTTACTTTGGTAAGGTTGGTTTCCGTCAGTTCCACCTTCTGCGCAACCGCGACTGGAAGCCCGTTGTTAACATTGACTCTCTCTGGGCCCTGATTCCCACCGAGGAGCGCGAGAGCTTCTTGGCCAAGCCTGATGCCAGCAACGCTCCCGTTATCGACACTCTCGCTGCTGGTTACGGTAAGGTTCTTGGTAAGGGTGTCCTTCCCGAGGTCCCTATCATCGTTCGTGCCCGCTTCGTCTCTTCTCTC…	OK	450	YES	CAG	Glutamine	Glutamine (CAG)
yHMPu5000037209_wickerhamiella_shivajii_210210_g001953.m1	ATGCCTACCAGATTTAGCAAAACACGCAAGTCGCGTGGTCACGTCTCTGCCGGTTACGGTCGTATCGGAAAGCATCGCAAGTCTCCTGGTGGTCGTGGTATGGCCGGTGGTCAGCACCACCACCGCACTAACCTCGATAAGTACCACCCTGGTTACTTTGGTAAGGTTGGTTTCCGTCAGTTCCACCTTTTGCGCAACCGCGACTGGAAGCCCGTTGTTAACATTGACTCTCTCTGGGCCCTGATTCCCTCCGAGGAGCGTGAGAGCTTCTTGGCCAAGCCTGATGCCAACAACGCTCCCGTTATCGACACTCTCGCTGCTGGCTACGGTAAGGTTCTCGGCAAGGGTGTCCTCCCCGAGGTCCCTATCATCGTTCGTGCCCGCTTCGTCTCTTCTCTC…	ATGCCTACCAGATTTAGCAAAACACGCAAGTCGCGTGGTCACGTCTCTGCCGGTTACGGTCGTATCGGAAAGCATCGCAAGTCTCCTGGTGGTCGTGGTATGGCCGGTGGTCAGCACCACCACCGCACTAACCTCGATAAGTACCACCCTGGTTACTTTGGTAAGGTTGGTTTCCGTCAGTTCCACCTTTTGCGCAACCGCGACTGGAAGCCCGTTGTTAACATTGACTCTCTCTGGGCCCTGATTCCCTCCGAGGAGCGTGAGAGCTTCTTGGCCAAGCCTGATGCCAACAACGCTCCCGTTATCGACACTCTCGCTGCTGGCTACGGTAAGGTTCTCGGCAAGGGTGTCCTCCCCGAGGTCCCTATCATCGTTCGTGCCCGCTTCGTCTCTTCTCTC…	OK	450	YES	CAG	Glutamine	Glutamine (CAG)
yHMPu5000038317_tortispora_sangerardonensis_170713_g001901.m1	ATGCCTACCAGATTTAGAAAGAGTCGTAAATTACGAGGACATGTGTCCATGGGTCAAGGTCGTGTAGGAAAGCACCGTAAGCATTCAGGTGGTCGTGGTAATGCTGGTGGTCTTACCCACCACAGAAGTAACTTCGATATTTACCATCCTGGTTACTTTGGTAAAGTTGGTATGCGTACATTCCATCATCAAACACCTCATGACTGGCGACCAGTTATCAATATTGACAAATTATGGTCACTTGTCGAATCAACTGAACGTGATGCTTTACTTAAATCAGCATCTACTGAAGCTGCTCCCGTTATTGATACTCTTGCTCACGGTTACGGAAAAGTTTTGGGTAAAGGACGTCTTCCCTCAGTTCCTGTTATTGTTAAAGCTAGATTTGTTAGTAAATTA…	ATGCCTACCAGATTTAGAAAGAGTCGTAAATTACGAGGACATGTGTCCATGGGTCAAGGTCGTGTAGGAAAGCACCGTAAGCATTCAGGTGGTCGTGGTAATGCTGGTGGTCTTACCCACCACAGAAGTAACTTCGATATTTACCATCCTGGTTACTTTGGTAAAGTTGGTATGCGTACATTCCATCATCAAACACCTCATGACTGGCGACCAGTTATCAATATTGACAAATTATGGTCACTTGTCGAATCAACTGAACGTGATGCTTTACTTAAATCAGCATCTACTGAAGCTGCTCCCGTTATTGATACTCTTGCTCACGGTTACGGAAAAGTTTTGGGTAAAGGACGTCTTCCCTCAGTTCCTGTTATTGTTAAAGCTAGATTTGTTAGTAAATTA…	OK	450	YES	CTT	Leucine1	Leucine1 (CTT)
yHDO570_kluyveromyces_starmeri_180604_g003778.m1	ATGCCTACCAGATTTACTAAGACCAGAAAGCACAGAGGTCACGTCTCAGCCGGTAACGGTCGTGTCGGTAAGCACAGAAAGCATCCCGGTGGTAGAGGTATGGCCGGTGGTTTGCACCACCACAGAACTAACTTGGACAAGTACCATCCAGGTTACTTCGGTAAGGTCGGTATGAGATACTTCCACAAGCAGCAAGCTCACTTCTGGAAGCCAGTCTTGAACTTGGACAAGTTGTGGAGTTTGGTGCCAGAAGAGAAGAGAGACGAATACTTGAAGTCCTCTTCCAAGTCTGCTGCTCCAGTCATCGACACCTTGGCTGCCGGTTACGGTAAGGTCTTGGGTAAGGGTAGAATCCCAAATGTCCCAGTCATTGTCAAGGCTAGATTCGTCTCCAAGTTG…	ATGCCTACCAGATTTACTAAGACCAGAAAGCACAGAGGTCACGTCTCAGCCGGTAACGGTCGTGTCGGTAAGCACAGAAAGCATCCCGGTGGTAGAGGTATGGCCGGTGGTTTGCACCACCACAGAACTAACTTGGACAAGTACCATCCAGGTTACTTCGGTAAGGTCGGTATGAGATACTTCCACAAGCAGCAAGCTCACTTCTGGAAGCCAGTCTTGAACTTGGACAAGTTGTGGAGTTTGGTGCCAGAAGAGAAGAGAGACGAATACTTGAAGTCCTCTTCCAAGTCTGCTGCTCCAGTCATCGACACCTTGGCTGCCGGTTACGGTAAGGTCTTGGGTAAGGGTAGAATCCCAAATGTCCCAGTCATTGTCAAGGCTAGATTCGTCTCCAAGTTG…	OK	450	YES	TTG	Leucine2	Leucine2 (TTG)
yHMPu5000035294_candida_fermenticarens_170307_g001503.m1	ATGCCTACCAGATTTACACAAACTAGAAAGCACAGAGGACACGTTTCAGCCGGTAAGGGTAGAATCGGTAAGCACAGAAAGCATCCCGGTGGTCGTGGTAAGGCTGGTGGTCAACACCACCACAGAACTAACTTGGATAAGTACCATCCAGGTTACTTCGGTAAGGTCGGTATGAGATACTTTCACAGACAAAGAAACCACTTCTGGAAACCAGAAATCAACCTCGACAAATTGTGGACTTTGCTTGACGAAGAAAAGAAAGAACAATACTTGAAGTCTTCTTCAGCTTCAGCTGCTCCAGTCATTGACACCTTAGCTCACGGTTACGGTAAGGTTTTGGCTAAGGGTAGATTGCCAGAAGTTCCTGTCATTGTCAAGGCTAGATTTGTTTCTAAATTG…	ATGCCTACCAGATTTACACAAACTAGAAAGCACAGAGGACACGTTTCAGCCGGTAAGGGTAGAATCGGTAAGCACAGAAAGCATCCCGGTGGTCGTGGTAAGGCTGGTGGTCAACACCACCACAGAACTAACTTGGATAAGTACCATCCAGGTTACTTCGGTAAGGTCGGTATGAGATACTTTCACAGACAAAGAAACCACTTCTGGAAACCAGAAATCAACCTCGACAAATTGTGGACTTTGCTTGACGAAGAAAAGAAAGAACAATACTTGAAGTCTTCTTCAGCTTCAGCTGCTCCAGTCATTGACACCTTAGCTCACGGTTACGGTAAGGTTTTGGCTAAGGGTAGATTGCCAGAAGTTCCTGTCATTGTCAAGGCTAGATTTGTTTCTAAATTG…	OK	450	YES	CAA	Glutamine	Glutamine (CAA)
yHMPu5000035665_middelhovenomyces_tepae_160613.g001394.m1	ATGCCTACCAGATTTAACAAGACAAGAAAGCACCGTGGAAACGTTTCAGCCGGTCACGGACGTGTTGGCAAGCACCGCAAGCATCCTGGTGGACGAGGAAAAGCTGGAGGTCAACATCATCACCGAACCAATCTCGACAAGTATCATCCTGGATACTTTGGAAAGGTCGGAATGCGATATTTTCACAAACAACAAAACCAGTTCTGGAGACCTACTCTTAACCTGGACAAACTATGGACTCTTATCCCTGCTGAAAACAGAGAGAAATACCTTGCTTCAGCCAGTGAAAGTGCTGCTCCCGTTATCGATACTTTAGCTGCTGGTTACGGAAAGGTTCTTGGCAAGGGAAGACTGCCTAGTGTTCCTATCATTGTCAAGGCTCGATTTGTATCAAAGCTC…	ATGCCTACCAGATTTAACAAGACAAGAAAGCACCGTGGAAACGTTTCAGCCGGTCACGGACGTGTTGGCAAGCACCGCAAGCATCCTGGTGGACGAGGAAAAGCTGGAGGTCAACATCATCACCGAACCAATCTCGACAAGTATCATCCTGGATACTTTGGAAAGGTCGGAATGCGATATTTTCACAAACAACAAAACCAGTTCTGGAGACCTACTCTTAACCTGGACAAACTATGGACTCTTATCCCTGCTGAAAACAGAGAGAAATACCTTGCTTCAGCCAGTGAAAGTGCTGCTCCCGTTATCGATACTTTAGCTGCTGGTTACGGAAAGGTTCTTGGCAAGGGAAGACTGCCTAGTGTTCCTATCATTGTCAAGGCTCGATTTGTATCAAAGCTC…	OK	450	YES	CAA	Glutamine	Glutamine (CAA)
yHMPu5000034965_Brettanomyces_naardenensis_SPADES.g002778.m1	ATGCCTACCAGATTGCGTCAGACAAGAAAGCACAGAGGTAACGTTACAGCCGGTTACGGTCGTATCGGAAAGCACAGAAAGCACCCAGGTGGACGTGGTATGGCCGGTGGTCAGCATCACCATAGAATTGCCATGGATAAATACCATCCAGGTTACTTCGGTAAGGTTGGTATGAGATTCTTCCACAAGCAAGAGAACCCATTCTGGAGACCTGTCATTAACTTAGAGAGACTATGGTCTTTGGTTGATAATAAGGATGAGAAGTTGGCCAAGTCCACTAAGGAATCCGCCGTTGTCATCGATACTTTGGCTCATGGTTACGGTAAGGTGTTGGGTAAGGGAAGACTTCCTGATGTCCCAGTTATTGTCAAGGCTAGATTCGTCTCCAAGTTAGCCGAG…	ATGCCTACCAGATTGCGTCAGACAAGAAAGCACAGAGGTAACGTTACAGCCGGTTACGGTCGTATCGGAAAGCACAGAAAGCACCCAGGTGGACGTGGTATGGCCGGTGGTCAGCATCACCATAGAATTGCCATGGATAAATACCATCCAGGTTACTTCGGTAAGGTTGGTATGAGATTCTTCCACAAGCAAGAGAACCCATTCTGGAGACCTGTCATTAACTTAGAGAGACTATGGTCTTTGGTTGATAATAAGGATGAGAAGTTGGCCAAGTCCACTAAGGAATCCGCCGTTGTCATCGATACTTTGGCTCATGGTTACGGTAAGGTGTTGGGTAAGGGAAGACTTCCTGATGTCCCAGTTATTGTCAAGGCTAGATTCGTCTCCAAGTTAGCCGAG…	OK	444	YES	CAG	Glutamine	Glutamine (CAG)
yHMPu5000037219_Pichia_gijzenarium_SPADES.g002182.m1	ATGCCTACCAGATTGCACAAGACAAGAAAGCACAGAGGTAACGTTACCGCCGGTAAAGGTCGTGTTGGTAAACATAGAAAGCATCCGGGTGGTAGAGGTATGGCCGGTGGTCAACACCATCACAGAACTAACTTAGATAAATACCATCCAGGTTATTTCGGTAAAGTTGGTATGAGATACTTCCACAAACAAAACGCTCACTTTTGGAAGCCAGTCATCAACTTAGACAAATTATGGTCTTTAGTTGAAAACAAGGATGAAAAAATTGCTTCATCAACTAAGGATGCTGCTGTCGTCATTGATACTTTAGCTTCTGGTTACGGTAAGGTTTTAGGTAAAGGTAGAATCCCACAAGTTCCAGTTATTGTCAAGGCTAGATACGTTTCAAAATTAGCTGAA…	ATGCCTACCAGATTGCACAAGACAAGAAAGCACAGAGGTAACGTTACCGCCGGTAAAGGTCGTGTTGGTAAACATAGAAAGCATCCGGGTGGTAGAGGTATGGCCGGTGGTCAACACCATCACAGAACTAACTTAGATAAATACCATCCAGGTTATTTCGGTAAAGTTGGTATGAGATACTTCCACAAACAAAACGCTCACTTTTGGAAGCCAGTCATCAACTTAGACAAATTATGGTCTTTAGTTGAAAACAAGGATGAAAAAATTGCTTCATCAACTAAGGATGCTGCTGTCGTCATTGATACTTTAGCTTCTGGTTACGGTAAGGTTTTAGGTAAAGGTAGAATCCCACAAGTTCCAGTTATTGTCAAGGCTAGATACGTTTCAAAATTAGCTGAA…	OK	444	YES	CAA	Glutamine	Glutamine (CAA)
yHMPu5000037203_Pichia_nanzhaoensis_SPADES.g001601.m1	ATGCCTACCAGATTGCACAAGACAAGAAAGCACAGAGGTAACGTTACCGCCGGTAAAGGTCGTGTTGGTAAACACAGAAAGCATCCGGGTGGTAGAGGTATGGCCGGTGGTCAGCATCATCACAGAACCAACTTAGATAAGTTCCATCCAGGTTACTTTGGTAAGGTTGGTATGAGATACTTCCACAAGCAAAACGCTCACTTCTGGAAGCCAGTCATCAACTTAGACAAATTATGGTCATTAGTCGAAAACAAGGATGAAAAAATTGCTTCATCAACCAAGGATGCTGCTGTTGTCATTGACACCTTAGCTTCTGGTTACGGTAAGGTTTTAGGTAAGGGTAGAATTCCAAATGTCCCAGTTATTGTTAAGGCTAGATACGTTTCAAAATTAGCTGAA…	ATGCCTACCAGATTGCACAAGACAAGAAAGCACAGAGGTAACGTTACCGCCGGTAAAGGTCGTGTTGGTAAACACAGAAAGCATCCGGGTGGTAGAGGTATGGCCGGTGGTCAGCATCATCACAGAACCAACTTAGATAAGTTCCATCCAGGTTACTTTGGTAAGGTTGGTATGAGATACTTCCACAAGCAAAACGCTCACTTCTGGAAGCCAGTCATCAACTTAGACAAATTATGGTCATTAGTCGAAAACAAGGATGAAAAAATTGCTTCATCAACCAAGGATGCTGCTGTTGTCATTGACACCTTAGCTTCTGGTTACGGTAAGGTTTTAGGTAAGGGTAGAATTCCAAATGTCCCAGTTATTGTTAAGGCTAGATACGTTTCAAAATTAGCTGAA…	OK	444	YES	CAG	Glutamine	Glutamine (CAG)
yHMPu5000034604_sporopachydermia_lactativora_180604.g004563.m1	ATGCCTACCAGATTGAGACAGACCAGAAAGCACCGTGGACACGTTACTGCCGGTTACGGTCGTATCGGAAAGCACAGAAAGTCCCCTGGTGGTAGAGGTATGGCCGGTGGTCAGCACCATCACAGAACTAACTTGGATAAGTACCATCCTGGTTACTTTGGTAAAGTTGGTATGAGATACTTCCACAAGCAGCAGGCTCACTTCTGGAAGCCTGTTATCAACCTCGACAAGCTGTGGACTTTGGTGCCAACTGAGTCTAGAGAGAAGCTTTTGGCTTCTGCTTCTACTGAGTCCGCTCCTGTCATTGATACCCTGGCTGCTGGTTACGGCAAAGTTCTGGGTAAGGGCAGACTTCCTCAGGTCCCCGTCATTGTCAAGGCCAGATTTGTTTCGAAGTTG…	ATGCCTACCAGATTGAGACAGACCAGAAAGCACCGTGGACACGTTACTGCCGGTTACGGTCGTATCGGAAAGCACAGAAAGTCCCCTGGTGGTAGAGGTATGGCCGGTGGTCAGCACCATCACAGAACTAACTTGGATAAGTACCATCCTGGTTACTTTGGTAAAGTTGGTATGAGATACTTCCACAAGCAGCAGGCTCACTTCTGGAAGCCTGTTATCAACCTCGACAAGCTGTGGACTTTGGTGCCAACTGAGTCTAGAGAGAAGCTTTTGGCTTCTGCTTCTACTGAGTCCGCTCCTGTCATTGATACCCTGGCTGCTGGTTACGGCAAAGTTCTGGGTAAGGGCAGACTTCCTCAGGTCCCCGTCATTGTCAAGGCCAGATTTGTTTCGAAGTTG…	OK	450	YES	CAG	Glutamine	Glutamine (CAG)
yHMPu5000035699_cyberlindnera_maclurae_160613.g004702.m1	ATGCCTACCAGATTGACTAAGACTAGAAAGCACAGAGGTCACGTTTCTGCCGGTAAGGGTAGAGTTGGTAAGCACAGAAAGCATCCGGGTGGTAGAGGTATGGCTGGTGGTCAGCACCACCACAGAACCAACATGGATAAATACCATCCAGGTTACTTCGGTAAGGTTGGTCAGAGATACTTCCACAAGCAGCAGCTACACTTCTGGAAGCCAGTCCTCAACTTGGACAAGTTGTGGACCTTGGTTGAGGAGGAGAAGAGAGAGCAGTACCTCAAGTCTGCCTCCGCCTCTGCTGCCCCAGTCATTGATACCTTGGCCCACGGCTACGGTAAGGTTTTGGGTAAGGGCCGTTTGCCACAGGTTCCAGTCATCGTGAAGGCCAGATTCGTCTCCAAGCTT…	ATGCCTACCAGATTGACTAAGACTAGAAAGCACAGAGGTCACGTTTCTGCCGGTAAGGGTAGAGTTGGTAAGCACAGAAAGCATCCGGGTGGTAGAGGTATGGCTGGTGGTCAGCACCACCACAGAACCAACATGGATAAATACCATCCAGGTTACTTCGGTAAGGTTGGTCAGAGATACTTCCACAAGCAGCAGCTACACTTCTGGAAGCCAGTCCTCAACTTGGACAAGTTGTGGACCTTGGTTGAGGAGGAGAAGAGAGAGCAGTACCTCAAGTCTGCCTCCGCCTCTGCTGCCCCAGTCATTGATACCTTGGCCCACGGCTACGGTAAGGTTTTGGGTAAGGGCCGTTTGCCACAGGTTCCAGTCATCGTGAAGGCCAGATTCGTCTCCAAGCTT…	OK	450	YES	CAG	Glutamine	Glutamine (CAG)
yHMPu5000034979_cyberlindnera_misumaiensis_160519_g002724.m1	ATGCCTACCAGATTGACTAAGACTAGAAAGCACAGAGGTCACGTTTCTGCCGGTAAGGGTAGAGTGGGTAAGCACAGAAAGCATCCCGGTGGTAGAGGTATGGCTGGTGGTCAACATCATCACAGAACCAACATGGATAAGTACCATCCAGGTTACTTTGGTAAGGTTGGTCAGAGATACTTCCACAAGCAGCAGCTACACTTCTGGAAGCCAGTCCTCAACTTGGACAAGTTGTGGACCTTGGTCGAGGAGGACAAGAGAGAGCAGTACCTCAAGTCTGCCTCCACCTCTGCTGCCCCAGTCATCGACACCTTGGCCCACGGCTACGGTAAGGTTTTGGGTAAGGGCCGTTTGCCACAGGTTCCAGTCATCGTGAAGGCCAGATTCGTTTCCAAGCTT…	ATGCCTACCAGATTGACTAAGACTAGAAAGCACAGAGGTCACGTTTCTGCCGGTAAGGGTAGAGTGGGTAAGCACAGAAAGCATCCCGGTGGTAGAGGTATGGCTGGTGGTCAACATCATCACAGAACCAACATGGATAAGTACCATCCAGGTTACTTTGGTAAGGTTGGTCAGAGATACTTCCACAAGCAGCAGCTACACTTCTGGAAGCCAGTCCTCAACTTGGACAAGTTGTGGACCTTGGTCGAGGAGGACAAGAGAGAGCAGTACCTCAAGTCTGCCTCCACCTCTGCTGCCCCAGTCATCGACACCTTGGCCCACGGCTACGGTAAGGTTTTGGGTAAGGGCCGTTTGCCACAGGTTCCAGTCATCGTGAAGGCCAGATTCGTTTCCAAGCTT…	OK	450	YES	CAA	Glutamine	Glutamine (CAA)
yHMPu5000034980_cyberlindnera_lachancei_160519.haplomerger2.g004480.m1	ATGCCTACCAGATTGACTAAGACTAGAAAGCACAGAGGTCACGTTTCTGCCGGTAAGGGTAGAGTCGGTAAGCACAGAAAGCATCCGGGTGGTAGAGGTAAGGCTGGTGGTCAACACCACCACAGAACCAACTTGGATAAGTACCATCCAGGTTACTTCGGTAAGGTTGGTCAAAGATACTTCCACAAGCAACAATTACACTTCTGGAAGCCAGTCTTGAACTTGGACAAGTTGTGGACTTTGGTTGAGGAGGAGAAGAGAGAACAATACTTGTCCTCTTCTTCTGCTTCTGCTGCTCCAGTCATTGACACCTTGGCTGCCGGTTACGGTAAGGTTTTGGGTAAGGGTCGTTTGCCACAAGTTCCAGTCATTGTCAAGGCTAGATTCGTCTCCAAGTTA…	ATGCCTACCAGATTGACTAAGACTAGAAAGCACAGAGGTCACGTTTCTGCCGGTAAGGGTAGAGTCGGTAAGCACAGAAAGCATCCGGGTGGTAGAGGTAAGGCTGGTGGTCAACACCACCACAGAACCAACTTGGATAAGTACCATCCAGGTTACTTCGGTAAGGTTGGTCAAAGATACTTCCACAAGCAACAATTACACTTCTGGAAGCCAGTCTTGAACTTGGACAAGTTGTGGACTTTGGTTGAGGAGGAGAAGAGAGAACAATACTTGTCCTCTTCTTCTGCTTCTGCTGCTCCAGTCATTGACACCTTGGCTGCCGGTTACGGTAAGGTTTTGGGTAAGGGTCGTTTGCCACAAGTTCCAGTCATTGTCAAGGCTAGATTCGTCTCCAAGTTA…	OK	450	YES	CAA	Glutamine	Glutamine (CAA)
yHMPu5000038351_candida_sanyiensis_170713.g001820.m1	ATGCCTACCAGATTGACTAAGACTAGAAAGCACAGAGGTCACGTTTCCGCCGGTAAGGGTCGTGTTGGTAAGCACAGAAAGCATCCAGGTGGTAGAGGTAAGGCTGGTGGTCAACACCACCACAGAACCAACTTGGACAAGTACCACCCTGGTTACTTCGGTAAGGTTGGTCAAAGATACTTCCACAAGCAACAATTGCACTTCTGGAAGCCAGTCTTGAACTTGGACAAGTTGTGGACTTTGGTTGAGGAGGAGAAGAGAGAGCAATACTTGAAGTCTGCTTCCGCCTCTGCTGCCCCAGTCATTGACACCTTGGCCCACGGTTACGGTAAGGTTTTGGGTAAGGGTAGATTGCCAAACGTCCCAGTTATTGTTAAGGCCAGATTCGTCTCTGCCTTG…	ATGCCTACCAGATTGACTAAGACTAGAAAGCACAGAGGTCACGTTTCCGCCGGTAAGGGTCGTGTTGGTAAGCACAGAAAGCATCCAGGTGGTAGAGGTAAGGCTGGTGGTCAACACCACCACAGAACCAACTTGGACAAGTACCACCCTGGTTACTTCGGTAAGGTTGGTCAAAGATACTTCCACAAGCAACAATTGCACTTCTGGAAGCCAGTCTTGAACTTGGACAAGTTGTGGACTTTGGTTGAGGAGGAGAAGAGAGAGCAATACTTGAAGTCTGCTTCCGCCTCTGCTGCCCCAGTCATTGACACCTTGGCCCACGGTTACGGTAAGGTTTTGGGTAAGGGTAGATTGCCAAACGTCCCAGTTATTGTTAAGGCCAGATTCGTCTCTGCCTTG…	OK	450	YES	CAA	Glutamine	Glutamine (CAA)
yHMPu5000035046_barnettozyma_populi_160613.g003371.m1	ATGCCTACCAGATTGACTAAGACTAGAAAGCACAGAGGTCACGTTTCCGCCGGTAAGGGTCGTGTTGGTAAGCACAGAAAGCATCCAGGTGGTAGAGGTAAGGCCGGTGGTCAACACCACCACAGAACCAATTTGGATAAGTACCATCCAGGTTACTTCGGTAAGGTTGGTCAAAGATACTTCCACAAGCAACAATTGCACTTCTGGAAGCCAGTCTTGAACTTGGACAAGTTGTGGACCTTGGTCGACGAGGACAAGAGAGAGCAATACTTGAAGTCCGCTTCAGCCTCTGCTGCCCCAGTTATTGACACCTTGGCCCACGGTTACGGTAAGGTTTTGGGTAAGGGTAGATTGCCAAACGTTCCAGTTATTGTTAAGGCCAGATTTGTTTCTGCTTTG…	ATGCCTACCAGATTGACTAAGACTAGAAAGCACAGAGGTCACGTTTCCGCCGGTAAGGGTCGTGTTGGTAAGCACAGAAAGCATCCAGGTGGTAGAGGTAAGGCCGGTGGTCAACACCACCACAGAACCAATTTGGATAAGTACCATCCAGGTTACTTCGGTAAGGTTGGTCAAAGATACTTCCACAAGCAACAATTGCACTTCTGGAAGCCAGTCTTGAACTTGGACAAGTTGTGGACCTTGGTCGACGAGGACAAGAGAGAGCAATACTTGAAGTCCGCTTCAGCCTCTGCTGCCCCAGTTATTGACACCTTGGCCCACGGTTACGGTAAGGTTTTGGGTAAGGGTAGATTGCCAAACGTTCCAGTTATTGTTAAGGCCAGATTTGTTTCTGCTTTG…	OK	450	YES	CAA	Glutamine	Glutamine (CAA)
yHMPu5000038111_barnettozyma_sucrosica_170912.g000030.m1	ATGCCTACCAGATTGACTAAGACTAGAAAGCACAGAGGTCACGTTTCCGCCGGTAAGGGTCGTGTTGGTAAGCACAGAAAGCATCCAGGTGGTAGAGGTAAGGCCGGTGGTCAACACCACCACAGAACCAACTTGGATAAGTACCATCCAGGTTACTTCGGTAAGGTTGGTCAAAGATACTTCCACAAGCAACAATTGCATTTCTGGAAGCCAGTCTTGAACTTGGACAAGTTGTGGACTTTGGTTGAGGAAGAGAAGAGAGAGCAATACTTGAAGTCCGCTTCTGCCTCTGCTGCCCCAGTCATTGACACCTTGGCCCACGGTTACGGTAAGGTTTTGGGTAAGGGTAGATTGCCAAACGTTCCAGTTATTGTTAAGGCTAGATTTGTTTCTGCTTTG…	ATGCCTACCAGATTGACTAAGACTAGAAAGCACAGAGGTCACGTTTCCGCCGGTAAGGGTCGTGTTGGTAAGCACAGAAAGCATCCAGGTGGTAGAGGTAAGGCCGGTGGTCAACACCACCACAGAACCAACTTGGATAAGTACCATCCAGGTTACTTCGGTAAGGTTGGTCAAAGATACTTCCACAAGCAACAATTGCATTTCTGGAAGCCAGTCTTGAACTTGGACAAGTTGTGGACTTTGGTTGAGGAAGAGAAGAGAGAGCAATACTTGAAGTCCGCTTCTGCCTCTGCTGCCCCAGTCATTGACACCTTGGCCCACGGTTACGGTAAGGTTTTGGGTAAGGGTAGATTGCCAAACGTTCCAGTTATTGTTAAGGCTAGATTTGTTTCTGCTTTG…	OK	450	YES	CAA	Glutamine	Glutamine (CAA)
yHMPu5000038112_barnettozyma_vustinii_170912.g005499.m1	ATGCCTACCAGATTGACTAAGACTAGAAAGCACAGAGGTCACGTTTCCGCCGGTAAGGGTCGTGTTGGTAAGCACAGAAAGCATCCAGGTGGTAGAGGTAAGGCCGGTGGTCAACACCACCACAGAACCAACTTGGATAAGTACCATCCAGGTTACTTCGGTAAGGTTGGTCAAAGATACTTCCACAAGCAACAATTGCACTTCTGGAAGCCAGTCTTGAACTTGGACAAGTTGTGGACTTTGGTTGAGGAGGAGAAGAGAGAGCAATACTTGAAGTCCGCTTCTGCCTCTGCTGCTCCAGTCATTGACACCTTGGCCCACGGTTACGGTAAGGTTTTGGGTAAGGGTAGATTGCCAAACGTCCCAGTTATTGTTAAGGCCAGATTTGTTTCTGCTTTG…	ATGCCTACCAGATTGACTAAGACTAGAAAGCACAGAGGTCACGTTTCCGCCGGTAAGGGTCGTGTTGGTAAGCACAGAAAGCATCCAGGTGGTAGAGGTAAGGCCGGTGGTCAACACCACCACAGAACCAACTTGGATAAGTACCATCCAGGTTACTTCGGTAAGGTTGGTCAAAGATACTTCCACAAGCAACAATTGCACTTCTGGAAGCCAGTCTTGAACTTGGACAAGTTGTGGACTTTGGTTGAGGAGGAGAAGAGAGAGCAATACTTGAAGTCCGCTTCTGCCTCTGCTGCTCCAGTCATTGACACCTTGGCCCACGGTTACGGTAAGGTTTTGGGTAAGGGTAGATTGCCAAACGTCCCAGTTATTGTTAAGGCCAGATTTGTTTCTGCTTTG…	OK	450	YES	CAA	Glutamine	Glutamine (CAA)
yHMPu5000035044_barnettozyma_californica_160519.g003606.m1	ATGCCTACCAGATTGACTAAGACTAGAAAGCACAGAGGTCACGTTTCCGCCGGTAAGGGTCGTGTTGGTAAGCACAGAAAGCATCCAGGTGGTAGAGGTAAGGCCGGTGGTCAACACCACCACAGAACCAACTTGGATAAGTACCATCCAGGTTACTTCGGTAAAGTTGGTCAAAGATACTTCCACAAGCAACAATTGCACTTCTGGAAGCCAGTCTTGAACTTGGACAAGTTGTGGACTTTGGTTGAGGAGGACAAGAGAGAGCAATATTTGAAATCTGCTTCTGCCTCTGCTGCCCCAGTCATTGACACCTTGGCCCATGGTTACGGTAAGGTTTTGGGTAAGGGTAGATTGCCAAACGTTCCAGTTATTGTTAAGGCTAGATTTGTTTCTGCTTTG…	ATGCCTACCAGATTGACTAAGACTAGAAAGCACAGAGGTCACGTTTCCGCCGGTAAGGGTCGTGTTGGTAAGCACAGAAAGCATCCAGGTGGTAGAGGTAAGGCCGGTGGTCAACACCACCACAGAACCAACTTGGATAAGTACCATCCAGGTTACTTCGGTAAAGTTGGTCAAAGATACTTCCACAAGCAACAATTGCACTTCTGGAAGCCAGTCTTGAACTTGGACAAGTTGTGGACTTTGGTTGAGGAGGACAAGAGAGAGCAATATTTGAAATCTGCTTCTGCCTCTGCTGCCCCAGTCATTGACACCTTGGCCCATGGTTACGGTAAGGTTTTGGGTAAGGGTAGATTGCCAAACGTTCCAGTTATTGTTAAGGCTAGATTTGTTTCTGCTTTG…	OK	450	YES	CAA	Glutamine	Glutamine (CAA)
yHMPu5000034969_candida_sp_160519.haplomerger2.g001681.m1	ATGCCTACCAGATTGACTAAGACTAGAAAGCACAGAGGTCACGTTTCCGCCGGTAAGGGAAGAGTTGGTAAGCACAGAAAGCATCCAGGTGGTAGAGGTATGGCTGGTGGTCAGCACCATCACAGAACCAACATGGATAAGTACCATCCAGGTTACTTTGGTAAGGTTGGTCAGAGATACTTCCACAAGCAGCAGCTACACTTCTGGAAGCCAGTTCTCAACTTGGACAAGTTGTGGACCTTGGTTGAGGAGGAGAAGAGAGAGCAGTACCTCAAGTCTGCCTCTGCCTCTGCTGCCCCAGTGATCGACACCTTGGCCCACGGCTACGGTAAGGTTTTGGGTAAGGGCCGTTTGCCACAGGTTCCAGTCATCGTGAAGGCCAGATTCGTCTCCAAGCTT…	ATGCCTACCAGATTGACTAAGACTAGAAAGCACAGAGGTCACGTTTCCGCCGGTAAGGGAAGAGTTGGTAAGCACAGAAAGCATCCAGGTGGTAGAGGTATGGCTGGTGGTCAGCACCATCACAGAACCAACATGGATAAGTACCATCCAGGTTACTTTGGTAAGGTTGGTCAGAGATACTTCCACAAGCAGCAGCTACACTTCTGGAAGCCAGTTCTCAACTTGGACAAGTTGTGGACCTTGGTTGAGGAGGAGAAGAGAGAGCAGTACCTCAAGTCTGCCTCTGCCTCTGCTGCCCCAGTGATCGACACCTTGGCCCACGGCTACGGTAAGGTTTTGGGTAAGGGCCGTTTGCCACAGGTTCCAGTCATCGTGAAGGCCAGATTCGTCTCCAAGCTT…	OK	450	YES	CAG	Glutamine	Glutamine (CAG)
yHMPu5000037256_cyberlindnera_galapagoensis_210210.g005517.m1	ATGCCTACCAGATTGACTAAAACTAGAAAGCATAGAGGTCACGTCTCTGCCGGTAAGGGTAGAATCGGTAAGCACAGAAAGCATCCGGGTGGTAGAGGTATGGCTGGTGGTCAACATCATCACAGAACCAACTTGGATAAATACCATCCAGGTTACTTCGGTAAGGTTGGTCAAAGATACTTCCACAAGCAACAATTACACTTCTGGAAGCCAGTCTTGAACTTGGACAAGTTGTGGACTTTGGTCCCAGAGGCCAAGAAGGACGAGTACTTGAAGTCCTCCACCGCCTCTGCTGCTCCAGTTATTGACACCTTGGCCTTCGGTTACGGTAAGGTTTTGGGTAAGGGTCGTTTGCCAGAAGTTCCAGTCATTGTTAAGGCTAGATTTGTCTCCAAGCTT…	ATGCCTACCAGATTGACTAAAACTAGAAAGCATAGAGGTCACGTCTCTGCCGGTAAGGGTAGAATCGGTAAGCACAGAAAGCATCCGGGTGGTAGAGGTATGGCTGGTGGTCAACATCATCACAGAACCAACTTGGATAAATACCATCCAGGTTACTTCGGTAAGGTTGGTCAAAGATACTTCCACAAGCAACAATTACACTTCTGGAAGCCAGTCTTGAACTTGGACAAGTTGTGGACTTTGGTCCCAGAGGCCAAGAAGGACGAGTACTTGAAGTCCTCCACCGCCTCTGCTGCTCCAGTTATTGACACCTTGGCCTTCGGTTACGGTAAGGTTTTGGGTAAGGGTCGTTTGCCAGAAGTTCCAGTCATTGTTAAGGCTAGATTTGTCTCCAAGCTT…	OK	450	YES	CAA	Glutamine	Glutamine (CAA)
yHMPu5000034598_Candida_dendrica_SPADES.g001495.m1	ATGCCTACCAGATTGACTAAAACCAGAAAACACAGAGGCCACGTCTCAGCCGGTAAGGGTCGTGTCGGTAAGCACAGAAAGCATCCAGGTGGTAGAGGTAAGGCTGGTGGTCAACACCACCACAGAATCAACATGGATAAGTACCATCCAGGTTACTTCGGTAAGGTTGGTATGAGATACTTCCACAAGCAACAAAACCAATTCTGGAGACCAGTCTTGAACTTGGACAAGTTGTGGACTTTGGTTCCAGAAGAAAAGAGAGAACAATACTTGAAGTCCTCTTCTGCTTCTGCTGCTCCAGTTATTGACACTTTGGCTGCCGGTTACGGTAAGGTTTTGGCTAAGGGTCGTTTGCCAAACGTTCCAGTTATCGTCAAGGCTAGATTTGTTTCCAAGTTG…	ATGCCTACCAGATTGACTAAAACCAGAAAACACAGAGGCCACGTCTCAGCCGGTAAGGGTCGTGTCGGTAAGCACAGAAAGCATCCAGGTGGTAGAGGTAAGGCTGGTGGTCAACACCACCACAGAATCAACATGGATAAGTACCATCCAGGTTACTTCGGTAAGGTTGGTATGAGATACTTCCACAAGCAACAAAACCAATTCTGGAGACCAGTCTTGAACTTGGACAAGTTGTGGACTTTGGTTCCAGAAGAAAAGAGAGAACAATACTTGAAGTCCTCTTCTGCTTCTGCTGCTCCAGTTATTGACACTTTGGCTGCCGGTTACGGTAAGGTTTTGGCTAAGGGTCGTTTGCCAAACGTTCCAGTTATCGTCAAGGCTAGATTTGTTTCCAAGTTG…	OK	450	YES	CAA	Glutamine	Glutamine (CAA)
yHMPu5000041855_candida_ascalaphidarum_170307_g005404.m1	ATGCCTACCAGATTGACCAAGACTAGAAAGCACAGAGGCAACGTTTCTGCCGGTAAGGGTAGAATCGGTAAGCACAGAAAGCACCCGGGTGGTAGAGGTAAGGCCGGTGGCCAGCACCACCACAGAACCAACTTGGACAAGTACCACCCTGGTTACTTCGGTAAGGTTGGTATGAGACACTACCACAAGCAGCAGGCCCACTTCTGGAAGCCCGAGATCAACTTGGACAAGTTGTGGACCTTGGTCGACAGCGAGAAGAAGGAGGAGTACTTGAAGTCTGCCTCTGCCTCTGCTGCCCCCGTCATTGACACCTTGGCCCACGGTTACGGCAAGGTTTTGGGCAAGGGTAGATTGCCCGAGGTCCCCGTCATTGTCAAGGCCAGATTTGTCTCCAAGTTG…	ATGCCTACCAGATTGACCAAGACTAGAAAGCACAGAGGCAACGTTTCTGCCGGTAAGGGTAGAATCGGTAAGCACAGAAAGCACCCGGGTGGTAGAGGTAAGGCCGGTGGCCAGCACCACCACAGAACCAACTTGGACAAGTACCACCCTGGTTACTTCGGTAAGGTTGGTATGAGACACTACCACAAGCAGCAGGCCCACTTCTGGAAGCCCGAGATCAACTTGGACAAGTTGTGGACCTTGGTCGACAGCGAGAAGAAGGAGGAGTACTTGAAGTCTGCCTCTGCCTCTGCTGCCCCCGTCATTGACACCTTGGCCCACGGTTACGGCAAGGTTTTGGGCAAGGGTAGATTGCCCGAGGTCCCCGTCATTGTCAAGGCCAGATTTGTCTCCAAGTTG…	OK	450	YES	CAG	Glutamine	Glutamine (CAG)
yHMPu5000037913_candida_cylindracea_180604.haplomerger2.g004291.m1	ATGCCTACCAGATTGACCAAGACGAGAAAGCACAGAGGCCACGTGTCTGCCGGTAAGGGTCGTGTCGGCAAGCACAGAAAGCACCCCGGTGGTCGCGGTATGGCTGGTGGCCAGCACCACCACAGAACCAACATGGACAAGTACCACCCTGGTTACTTTGGTAAGGTTGGTATGCGCTACTTCCACAAGCAGCAGAACCACTTCTGGCGCCCGGTGTTGAACTTGGACAAGTTGTGGACCTTGGTTGAGGAGGAGAAGCGCGACGAGTACCTCAAGTCCGCCTCTGCCTCTGCTGCCCCCGTCATCGACACCTTGGCCCACGGTTACGGCAAGGTGTTGGGCAAGGGCCGTCTCCCCCAGGTGCCTGTCATTGTCAAGGCCCGCTTTGTCTCCAAGTTG…	ATGCCTACCAGATTGACCAAGACGAGAAAGCACAGAGGCCACGTGTCTGCCGGTAAGGGTCGTGTCGGCAAGCACAGAAAGCACCCCGGTGGTCGCGGTATGGCTGGTGGCCAGCACCACCACAGAACCAACATGGACAAGTACCACCCTGGTTACTTTGGTAAGGTTGGTATGCGCTACTTCCACAAGCAGCAGAACCACTTCTGGCGCCCGGTGTTGAACTTGGACAAGTTGTGGACCTTGGTTGAGGAGGAGAAGCGCGACGAGTACCTCAAGTCCGCCTCTGCCTCTGCTGCCCCCGTCATCGACACCTTGGCCCACGGTTACGGCAAGGTGTTGGGCAAGGGCCGTCTCCCCCAGGTGCCTGTCATTGTCAAGGCCCGCTTTGTCTCCAAGTTG…	OK	450	YES	CAG	Glutamine	Glutamine (CAG)
yHMPu5000026072_geotrichum_klebahnii_190924.g000629.m1	ATGCCTACCAGATTGACCAAGACCAGAAAGCTTAGAGGACACGTCTCCGCCGGTCACGGACGTATTGGCAAGCACCGCAAGCATCCCGGTGGTCGTGGTATGGCCGGTGGTCAGCACCACCACCGTACCAACATGGATAAGTACCATCCTGGTTACTTCGGAAAGGTTGGTATGAGATTTTTCCACAAGCAACAGAACCGCTTCTGGAAGCCCGTTCTCAATCTTGACAAGCTGTGGACTCTTGTCCCTGCTGAGAACAGAGAAAAGTACATTGCTGCCGCTTCTCCCAGCGCTGCTCCTGTTATTGACACTCTTGCTGCTGGATACGGAAAGGTCCTTGGTAAGGGTCGTCTGCCCAATGTCCCCGTCATTGTTAAGGCCAGATTTGTCTCCAAGCTC…	ATGCCTACCAGATTGACCAAGACCAGAAAGCTTAGAGGACACGTCTCCGCCGGTCACGGACGTATTGGCAAGCACCGCAAGCATCCCGGTGGTCGTGGTATGGCCGGTGGTCAGCACCACCACCGTACCAACATGGATAAGTACCATCCTGGTTACTTCGGAAAGGTTGGTATGAGATTTTTCCACAAGCAACAGAACCGCTTCTGGAAGCCCGTTCTCAATCTTGACAAGCTGTGGACTCTTGTCCCTGCTGAGAACAGAGAAAAGTACATTGCTGCCGCTTCTCCCAGCGCTGCTCCTGTTATTGACACTCTTGCTGCTGGATACGGAAAGGTCCTTGGTAAGGGTCGTCTGCCCAATGTCCCCGTCATTGTTAAGGCCAGATTTGTCTCCAAGCTC…	OK	450	YES	CAG	Glutamine	Glutamine (CAG)
yHMPu5000037875_geotrichum_carabidarum_190924.g003593.m1	ATGCCTACCAGATTGACCAAGACCAGAAAGCTTAGAGGACACGTCTCCGCCGGTCACGGACGTATTGGAAAGCACAGAAAGCATCCCGGTGGTCGTGGTATGGCCGGTGGTCAGCACCACCACCGTACCAACATGGACAAGTACCATCCCGGTTACTTTGGTAAGGTCGGTATGCGATACTTCCACAAGCAGCAGAACCACTTCTGGAAGCCTGTCCTGAACTTGGACAAGCTGTGGACCCTGGTCCCTGCCGAGAACAGAGAAAAGTACATTGCCTCTGCCTCGGAGTCCGCTGCCCCTGTGATTGACACCCTGGCCGCTGGCTACGGTAAGGTCCTGGGCAAGGGCCGCCTGCCCAACGTCCCCGTCATTGTCAAGGCCCGTTTTGTCTCCAAGCTC…	ATGCCTACCAGATTGACCAAGACCAGAAAGCTTAGAGGACACGTCTCCGCCGGTCACGGACGTATTGGAAAGCACAGAAAGCATCCCGGTGGTCGTGGTATGGCCGGTGGTCAGCACCACCACCGTACCAACATGGACAAGTACCATCCCGGTTACTTTGGTAAGGTCGGTATGCGATACTTCCACAAGCAGCAGAACCACTTCTGGAAGCCTGTCCTGAACTTGGACAAGCTGTGGACCCTGGTCCCTGCCGAGAACAGAGAAAAGTACATTGCCTCTGCCTCGGAGTCCGCTGCCCCTGTGATTGACACCCTGGCCGCTGGCTACGGTAAGGTCCTGGGCAAGGGCCGCCTGCCCAACGTCCCCGTCATTGTCAAGGCCCGTTTTGTCTCCAAGCTC…	OK	450	YES	CAG	Glutamine	Glutamine (CAG)
yHMPu5000040917_geotrichum_citri-aurantii_201018.g003800.m1	ATGCCTACCAGATTGACCAAGACCAGAAAGCTTAGAGGACACGTCTCCGCCGGTCACGGACGTATCGGCAAGCACCGCAAGCATCCCGGTGGTCGTGGTTTGGCTGGTGGTCAGCACCACCACCGTACCAACATGGACAAGTACCATCCCGGTTACTTCGGTAAGGTTGGTATGAGATACTTCCACAAGCAGCAGAACCACTTCTGGAAGCCCGTCCTCAACCTTGACAAGCTCTGGACTCTTGTCCCTACTGAGAACAGAGAGAAGTACATTTCTGAGGCTTCTTCCTCTGCTGCTCCCGTCATCGACACTCTTGCTGCTGGCTACGGAAAGGTCCTCGGTAAGGGTCGTCTCCCCAACGTCCCCGTCATTGTTAAGGCCAGATTCGTTTCTGCTCTT…	ATGCCTACCAGATTGACCAAGACCAGAAAGCTTAGAGGACACGTCTCCGCCGGTCACGGACGTATCGGCAAGCACCGCAAGCATCCCGGTGGTCGTGGTTTGGCTGGTGGTCAGCACCACCACCGTACCAACATGGACAAGTACCATCCCGGTTACTTCGGTAAGGTTGGTATGAGATACTTCCACAAGCAGCAGAACCACTTCTGGAAGCCCGTCCTCAACCTTGACAAGCTCTGGACTCTTGTCCCTACTGAGAACAGAGAGAAGTACATTTCTGAGGCTTCTTCCTCTGCTGCTCCCGTCATCGACACTCTTGCTGCTGGCTACGGAAAGGTCCTCGGTAAGGGTCGTCTCCCCAACGTCCCCGTCATTGTTAAGGCCAGATTCGTTTCTGCTCTT…	OK	450	YES	CAG	Glutamine	Glutamine (CAG)
yHMPu5000034738_geotrichum_candidum_190924.haplomerger2.g008470.m1	ATGCCTACCAGATTGACCAAGACCAGAAAGCTTAGAGGACACGTCTCCGCCGGTCACGGACGTATCGGCAAGCACCGCAAGCATCCCGGTGGTCGTGGTATGGCTGGTGGTCAGCACCATCACCGTACCAACATGGATAAGTACCATCCCGGTTACTTCGGTAAGGTTGGTATGAGATACTTCCACAAGCAGCAGAACCACTTCTGGAAGCCCGTGCTCAACCTTGACAAGCTTTGGACTCTTGTCCCCGCTGAGAACAGAGAGAAGTACATTGCTTCTGCCTCTGCCTCTGCTGCTCCCGTCATTGACACTCTTGCTGCTGGCTACGGAAAGGTCCTCGGTAAGGGTCGTCTCCCCAACGTTCCCGTCATTGTTAAGGCCAGATTTGTTTCTGCTCTC…	ATGCCTACCAGATTGACCAAGACCAGAAAGCTTAGAGGACACGTCTCCGCCGGTCACGGACGTATCGGCAAGCACCGCAAGCATCCCGGTGGTCGTGGTATGGCTGGTGGTCAGCACCATCACCGTACCAACATGGATAAGTACCATCCCGGTTACTTCGGTAAGGTTGGTATGAGATACTTCCACAAGCAGCAGAACCACTTCTGGAAGCCCGTGCTCAACCTTGACAAGCTTTGGACTCTTGTCCCCGCTGAGAACAGAGAGAAGTACATTGCTTCTGCCTCTGCCTCTGCTGCTCCCGTCATTGACACTCTTGCTGCTGGCTACGGAAAGGTCCTCGGTAAGGGTCGTCTCCCCAACGTTCCCGTCATTGTTAAGGCCAGATTTGTTTCTGCTCTC…	OK	450	YES	CAG	Glutamine	Glutamine (CAG)
geotrichum_candidum_g002032.m17	ATGCCTACCAGATTGACCAAGACCAGAAAGCTTAGAGGACACGTCTCCGCCGGTCACGGACGTATCGGCAAGCACCGCAAGCATCCCGGTGGTCGTGGTATGGCTGGTGGTCAGCACCATCACCGTACCAACATGGATAAGTACCATCCCGGTTACTTCGGTAAGGTTGGTATGAGATACTTCCACAAGCAGCAGAACCACTTCTGGAAGCCCGTGCTCAACCTTGACAAGCTTTGGACTCTTGTCCCCGCTGAGAACAGAGAGAAGTACATTGCTTCTGCCTCTGCCTCTGCTGCTCCCGTCATTGACACTCTTGCTGCTGGCTACGGAAAGGTCCTCGGTAAGGGTCGTCTCCCCAACGTTCCCGTCATTGTTAAGGCCAGATTTGTTTCTGCTCTC…	ATGCCTACCAGATTGACCAAGACCAGAAAGCTTAGAGGACACGTCTCCGCCGGTCACGGACGTATCGGCAAGCACCGCAAGCATCCCGGTGGTCGTGGTATGGCTGGTGGTCAGCACCATCACCGTACCAACATGGATAAGTACCATCCCGGTTACTTCGGTAAGGTTGGTATGAGATACTTCCACAAGCAGCAGAACCACTTCTGGAAGCCCGTGCTCAACCTTGACAAGCTTTGGACTCTTGTCCCCGCTGAGAACAGAGAGAAGTACATTGCTTCTGCCTCTGCCTCTGCTGCTCCCGTCATTGACACTCTTGCTGCTGGCTACGGAAAGGTCCTCGGTAAGGGTCGTCTCCCCAACGTTCCCGTCATTGTTAAGGCCAGATTTGTTTCTGCTCTC…	OK	450	YES	CAG	Glutamine	Glutamine (CAG)
yHMPu5000026130_galactomyces_reessii_190924.g006487.m1	ATGCCTACCAGATTGACCAAGACCAGAAAGCTTAGAGGACACGTCTCCGCCGGTCACGGACGTATCGGCAAGCACCGCAAGCATCCCGGTGGTCGTGGTATGGCTGGTGGTCAGCACCATCACCGTACCAACATGGATAAGTACCATCCCGGTTACTTCGGTAAGGTTGGTATGAGATACTTCCACAAGCAGCAGAACCACTTCTGGAAGCCCGTCCTCAACCTCGACAAGCTCTGGACTCTTGTCCCCGCTGAGAACAGAGAGAAGTACATTGCTGAGGCTTCTTCTTCTGCTGCTCCCGTCATCGACACTCTTGCTGCTGGCTACGGAAAGGTCCTCGGTAAGGGTCGTCTCCCCAACGTCCCCGTCATTGTCAAGGCTAGATTCGTTTCTGCTCTT…	ATGCCTACCAGATTGACCAAGACCAGAAAGCTTAGAGGACACGTCTCCGCCGGTCACGGACGTATCGGCAAGCACCGCAAGCATCCCGGTGGTCGTGGTATGGCTGGTGGTCAGCACCATCACCGTACCAACATGGATAAGTACCATCCCGGTTACTTCGGTAAGGTTGGTATGAGATACTTCCACAAGCAGCAGAACCACTTCTGGAAGCCCGTCCTCAACCTCGACAAGCTCTGGACTCTTGTCCCCGCTGAGAACAGAGAGAAGTACATTGCTGAGGCTTCTTCTTCTGCTGCTCCCGTCATCGACACTCTTGCTGCTGGCTACGGAAAGGTCCTCGGTAAGGGTCGTCTCCCCAACGTCCCCGTCATTGTCAAGGCTAGATTCGTTTCTGCTCTT…	OK	450	YES	CAG	Glutamine	Glutamine (CAG)
yHMPu5000026072_geotrichum_klebahnii_190924.g002311.m1	ATGCCTACCAGATTGACCAAGACCAGAAAGCTTAGAGGACACGTCTCCGCCGGTCACGGACGTATCGGCAAGCACCGCAAGCATCCCGGTGGTCGTGGTATGGCTGGTGGTCAGCACCATCACCGTACCAACATGGATAAATACCATCCTGGTTACTTTGGTAAGGTTGGTATGAGATTCTTCCACAAGCAACAAAACCGATTTTGGAAGCCCGTTCTTAACTTGGACAAGCTGTGGACTTTGGTCCCTGCTGAGAACAGAGAGAAGTACATTGCTGCTGCCTCTCCCAGCGCTGCCCCTGTTATCGACACTCTTGCTGCTGGATACGGAAAGGTCCTTGGTAAGGGTCGTCTCCCTAACGTACCTGTCATTGTTAAGGCCCGATTTGTCTCCAAGCTC…	ATGCCTACCAGATTGACCAAGACCAGAAAGCTTAGAGGACACGTCTCCGCCGGTCACGGACGTATCGGCAAGCACCGCAAGCATCCCGGTGGTCGTGGTATGGCTGGTGGTCAGCACCATCACCGTACCAACATGGATAAATACCATCCTGGTTACTTTGGTAAGGTTGGTATGAGATTCTTCCACAAGCAACAAAACCGATTTTGGAAGCCCGTTCTTAACTTGGACAAGCTGTGGACTTTGGTCCCTGCTGAGAACAGAGAGAAGTACATTGCTGCTGCCTCTCCCAGCGCTGCCCCTGTTATCGACACTCTTGCTGCTGGATACGGAAAGGTCCTTGGTAAGGGTCGTCTCCCTAACGTACCTGTCATTGTTAAGGCCCGATTTGTCTCCAAGCTC…	OK	450	YES	CAG	Glutamine	Glutamine (CAG)
yHMPu5000038339_geotrichum_phurueaensis_190924.g002737.m1	ATGCCTACCAGATTGACCAAGACCAGAAAGCTTAGAGGACACGTCTCCGCCGGTCACGGACGTATCGGCAAGCACCGCAAGCATCCCGGTGGTCGTGGTATGGCTGGTGGTCAGCACCACCACCGTACCAACATGGATAAGTACCATCCCGGTTACTTTGGTAAGGTTGGTATGAGATACTTCCACAAGCAGCAGAACCACTTCTGGAAGCCTGTGCTCAACCTTGACAAGCTTTGGACTCTTGTCCCCGCTGAGAACAGAGAGAAGTACATTGCTTCTGCCTCTGCCTCTGCTGCCCCTGTCATTGACACTCTTGCTGCTGGCTACGGAAAGGTCCTCGGTAAGGGTCGTCTCCCCAACGTCCCCGTCATTGTTAAGGCCAGATTTGTTTCTGCTCTC…	ATGCCTACCAGATTGACCAAGACCAGAAAGCTTAGAGGACACGTCTCCGCCGGTCACGGACGTATCGGCAAGCACCGCAAGCATCCCGGTGGTCGTGGTATGGCTGGTGGTCAGCACCACCACCGTACCAACATGGATAAGTACCATCCCGGTTACTTTGGTAAGGTTGGTATGAGATACTTCCACAAGCAGCAGAACCACTTCTGGAAGCCTGTGCTCAACCTTGACAAGCTTTGGACTCTTGTCCCCGCTGAGAACAGAGAGAAGTACATTGCTTCTGCCTCTGCCTCTGCTGCCCCTGTCATTGACACTCTTGCTGCTGGCTACGGAAAGGTCCTCGGTAAGGGTCGTCTCCCCAACGTCCCCGTCATTGTTAAGGCCAGATTTGTTTCTGCTCTC…	OK	450	YES	CAG	Glutamine	Glutamine (CAG)
yHMPu5000034662_galactomyces_geotrichum_201018.g002800.m1	ATGCCTACCAGATTGACCAAGACCAGAAAGCTTAGAGGACACGTCTCCGCCGGTCACGGACGTATCGGCAAGCACCGCAAGCATCCCGGTGGTCGTGGTATGGCTGGTGGTCAGCACCACCACCGTACCAACATGGATAAGTACCATCCCGGTTACTTTGGTAAGGTTGGTATGAGATACTTCCACAAGCAGCAGAACCACTTCTGGAAGCCCGTGCTCAACCTTGACAAGCTTTGGACTCTTGTCCCCGCTGAGAACAGAGAGAAGTACATTGCTTCTGCCTCTGCCTCTGCTGCTCCTGTCATTGACACTCTTGCTGCTGGCTACGGAAAGGTCCTCGGTAAGGGTCGTCTCCCCAACGTTCCCGTCATTGTTAAGGCCAGATTTGTTTCTGCTCTC…	ATGCCTACCAGATTGACCAAGACCAGAAAGCTTAGAGGACACGTCTCCGCCGGTCACGGACGTATCGGCAAGCACCGCAAGCATCCCGGTGGTCGTGGTATGGCTGGTGGTCAGCACCACCACCGTACCAACATGGATAAGTACCATCCCGGTTACTTTGGTAAGGTTGGTATGAGATACTTCCACAAGCAGCAGAACCACTTCTGGAAGCCCGTGCTCAACCTTGACAAGCTTTGGACTCTTGTCCCCGCTGAGAACAGAGAGAAGTACATTGCTTCTGCCTCTGCCTCTGCTGCTCCTGTCATTGACACTCTTGCTGCTGGCTACGGAAAGGTCCTCGGTAAGGGTCGTCTCCCCAACGTTCCCGTCATTGTTAAGGCCAGATTTGTTTCTGCTCTC…	OK	450	YES	CAG	Glutamine	Glutamine (CAG)
yHMPu5000038073_geotrichum_europaeum_170912.g001943.m1	ATGCCTACCAGATTGACCAAGACCAGAAAGCTTAGAGGACACGTCTCCGCCGGTCACGGACGTATCGGCAAGCACCGCAAGCATCCCGGTGGTCGTGGTATGGCTGGTGGTCAGCACCACCACCGTACCAACATGGATAAGTACCATCCCGGTTACTTTGGTAAGGTTGGTATGAGATACTTCCACAAGCAGCAGAACCACTTCTGGAAGCCCGTGCTCAACCTTGACAAGCTTTGGACTCTTGTCCCCGCTGAGAACAGAGAGAAGTACATTGCTTCTGCCTCTGCTTCTGCTGCTCCTGTCATTGACACTCTTGCTGCTGGCTACGGAAAGGTCCTCGGTAAGGGTCGTCTCCCCAACGTTCCCGTCATTGTTAAGGCTAGATTTGTTTCTGCTCTC…	ATGCCTACCAGATTGACCAAGACCAGAAAGCTTAGAGGACACGTCTCCGCCGGTCACGGACGTATCGGCAAGCACCGCAAGCATCCCGGTGGTCGTGGTATGGCTGGTGGTCAGCACCACCACCGTACCAACATGGATAAGTACCATCCCGGTTACTTTGGTAAGGTTGGTATGAGATACTTCCACAAGCAGCAGAACCACTTCTGGAAGCCCGTGCTCAACCTTGACAAGCTTTGGACTCTTGTCCCCGCTGAGAACAGAGAGAAGTACATTGCTTCTGCCTCTGCTTCTGCTGCTCCTGTCATTGACACTCTTGCTGCTGGCTACGGAAAGGTCCTCGGTAAGGGTCGTCTCCCCAACGTTCCCGTCATTGTTAAGGCTAGATTTGTTTCTGCTCTC…	OK	450	YES	CAG	Glutamine	Glutamine (CAG)
yHMPu5000034738_geotrichum_candidum_190924.haplomerger2.g007629.m1	ATGCCTACCAGATTGACCAAGACCAGAAAGCTTAGAGGACACGTCTCCGCCGGTCACGGACGTATCGGCAAGCACCGCAAGCATCCCGGTGGTCGTGGTATGGCTGGTGGTCAGCACCACCACCGTACCAACATGGACAAGTACCATCCCGGTTACTTTGGTAAGGTTGGTATGAGATACTTCCACAAGCAGCAGAACCACTTCTGGAAGCCCGTGCTCAACCTTGACAAGCTTTGGACTCTTGTCCCCGCTGAGAACAGAGAGAAGTACATTGCTTCTGCCTCTGCCTCTGCTGCTCCCGTCATTGACACTCTTGCTGCTGGCTACGGAAAGGTCCTCGGTAAGGGTCGTCTCCCCAACGTTCCCGTCATTGTTAAGGCCAGATTTGTTTCTGCTCTC…	ATGCCTACCAGATTGACCAAGACCAGAAAGCTTAGAGGACACGTCTCCGCCGGTCACGGACGTATCGGCAAGCACCGCAAGCATCCCGGTGGTCGTGGTATGGCTGGTGGTCAGCACCACCACCGTACCAACATGGACAAGTACCATCCCGGTTACTTTGGTAAGGTTGGTATGAGATACTTCCACAAGCAGCAGAACCACTTCTGGAAGCCCGTGCTCAACCTTGACAAGCTTTGGACTCTTGTCCCCGCTGAGAACAGAGAGAAGTACATTGCTTCTGCCTCTGCCTCTGCTGCTCCCGTCATTGACACTCTTGCTGCTGGCTACGGAAAGGTCCTCGGTAAGGGTCGTCTCCCCAACGTTCCCGTCATTGTTAAGGCCAGATTTGTTTCTGCTCTC…	OK	450	YES	CAG	Glutamine	Glutamine (CAG)
yHMPu5000038342_dipodascus_macrosporus_180604.g005561.m1	ATGCCTACCAGATTGACCAAGACCAGAAAGCTTAGAGGACACGTCTCCGCCGGTCACGGACGTATCGGAAAGCACCGCAAGCATCCCGGTGGTCGTGGTATGGCCGGTGGTCAGCACCACCACCGTACCAACATGGATAAGTACCATCCTGGTTACTTTGGAAAGGTTGGTATGAGATACTTCCACAAGCAGCAGAACCACTTCTGGAAGCCCGTTCTTAACCTCGACAAGCTATGGACTCTCGTCCCTGCTGAGAACAGAGAAAAGTACATTGCCGCTGCTTCTCCCAGCGCTGCCCCCGTCATTGACACTCTTGCTGCTGGCTACGGAAAGGTTCTGGGCAAGGGCCGTCTTCCTAACGTCCCCGTCATTGTCAAGGCCCGATTTGTCTCCAAGCTC…	ATGCCTACCAGATTGACCAAGACCAGAAAGCTTAGAGGACACGTCTCCGCCGGTCACGGACGTATCGGAAAGCACCGCAAGCATCCCGGTGGTCGTGGTATGGCCGGTGGTCAGCACCACCACCGTACCAACATGGATAAGTACCATCCTGGTTACTTTGGAAAGGTTGGTATGAGATACTTCCACAAGCAGCAGAACCACTTCTGGAAGCCCGTTCTTAACCTCGACAAGCTATGGACTCTCGTCCCTGCTGAGAACAGAGAAAAGTACATTGCCGCTGCTTCTCCCAGCGCTGCCCCCGTCATTGACACTCTTGCTGCTGGCTACGGAAAGGTTCTGGGCAAGGGCCGTCTTCCTAACGTCCCCGTCATTGTCAAGGCCCGATTTGTCTCCAAGCTC…	OK	450	YES	CAG	Glutamine	Glutamine (CAG)
yHMPu5000041821_geotrichum_cucujoidarum_170912.g007240.m1	ATGCCTACCAGATTGACCAAGACCAGAAAGCTTAGAGGACACGTCTCCGCCGGTCACGGACGTATCGGAAAGCACAGAAAGCATCCCGGTGGTCGTGGTATGGCCGGTGGTCAGCACCACCACCGTACCAACATGGACAAGTACCATCCCGGTTACTTTGGTAAGGTTGGTATGAGATACTTCCACAAGCAGCAGAACCACTTCTGGAAGCCCGTTCTCAACCTCGACAAGCTCTGGACTCTTGTCCCCGCTGAGAACAGAGAGAAGTACATTGCTGCTGCCTCTCCTTCCGCTGCCCCCGTCATTGATACCTTGGCTGCTGGCTACGGTAAGGTCCTTGCCAAGGGCCGTCTCCCCAACGTTCCTGTTATTGTTAAGGCCAGATTTGTCTCGAAACTC…	ATGCCTACCAGATTGACCAAGACCAGAAAGCTTAGAGGACACGTCTCCGCCGGTCACGGACGTATCGGAAAGCACAGAAAGCATCCCGGTGGTCGTGGTATGGCCGGTGGTCAGCACCACCACCGTACCAACATGGACAAGTACCATCCCGGTTACTTTGGTAAGGTTGGTATGAGATACTTCCACAAGCAGCAGAACCACTTCTGGAAGCCCGTTCTCAACCTCGACAAGCTCTGGACTCTTGTCCCCGCTGAGAACAGAGAGAAGTACATTGCTGCTGCCTCTCCTTCCGCTGCCCCCGTCATTGATACCTTGGCTGCTGGCTACGGTAAGGTCCTTGCCAAGGGCCGTCTCCCCAACGTTCCTGTTATTGTTAAGGCCAGATTTGTCTCGAAACTC…	OK	450	YES	CAG	Glutamine	Glutamine (CAG)
yHMPu5000041822_dipodascus_geniculatus_170307_g005769.m1	ATGCCTACCAGATTGACCAAGACCAGAAAGCTTAGAGGACACGTCTCCGCCGGTCACGGACGTATCGGAAAGCACAGAAAGCATCCCGGTGGTAGAGGTATGGCCGGTGGTCAACACCACCACCGTACTAACATGGATAAGTACCATCCAGGTTACTTCGGTAAGGTCGGTATGAGATACTTCCACAAGCAACAAAACCACTTCTGGAAGCCCGTTCTCAATCTCGACAAGCTGTGGTCTTTGGTTCCTGCTGAGAACAGAGAAAAGTACATTGCCAACGCTTCCGAATCTGCTGCCCCTGTTATTGACACTTTGGCTGCTGGTTACGGTAAGGTCCTTGGTAAGGGTCGTCTTCCTGACGTTCCTGTCATTGTCAAGGCCAGATTCGTCTCTGCTCTT…	ATGCCTACCAGATTGACCAAGACCAGAAAGCTTAGAGGACACGTCTCCGCCGGTCACGGACGTATCGGAAAGCACAGAAAGCATCCCGGTGGTAGAGGTATGGCCGGTGGTCAACACCACCACCGTACTAACATGGATAAGTACCATCCAGGTTACTTCGGTAAGGTCGGTATGAGATACTTCCACAAGCAACAAAACCACTTCTGGAAGCCCGTTCTCAATCTCGACAAGCTGTGGTCTTTGGTTCCTGCTGAGAACAGAGAAAAGTACATTGCCAACGCTTCCGAATCTGCTGCCCCTGTTATTGACACTTTGGCTGCTGGTTACGGTAAGGTCCTTGGTAAGGGTCGTCTTCCTGACGTTCCTGTCATTGTCAAGGCCAGATTCGTCTCTGCTCTT…	OK	450	YES	CAA	Glutamine	Glutamine (CAA)
yHMPu5000038342_dipodascus_macrosporus_180604.g002747.m1	ATGCCTACCAGATTGACCAAGACCAGAAAGCTCAGAGGACATGTTTCAGCCGGTCACGGACGTATCGGCAAGCACCGCAAGCATCCCGGTGGTCGTGGTATGGCCGGTGGTCAGCACCACCATCGTACCAACATGGATAAGTACCATCCTGGTTACTTTGGAAAGGTTGGTATGAGATACTTCCACAAGCAACAGAACCACTTCTGGAAGCCCGTTCTCAATCTTGACAAGCTGTGGACTCTTGTCCCTGCTGAGAACAGAGAAAAGTACATTGCCGCTGCCTCCCCCAGCGCTGCCCCCGTCATTGACACTCTTGCTGCTGGCTACGGAAAGGTCCTTGGTAAGGGTCGTCTCCCTCAAGTTCCTGTCATTGTTAAGGCACGTTTTGTCTCCAAGCTT…	ATGCCTACCAGATTGACCAAGACCAGAAAGCTCAGAGGACATGTTTCAGCCGGTCACGGACGTATCGGCAAGCACCGCAAGCATCCCGGTGGTCGTGGTATGGCCGGTGGTCAGCACCACCATCGTACCAACATGGATAAGTACCATCCTGGTTACTTTGGAAAGGTTGGTATGAGATACTTCCACAAGCAACAGAACCACTTCTGGAAGCCCGTTCTCAATCTTGACAAGCTGTGGACTCTTGTCCCTGCTGAGAACAGAGAAAAGTACATTGCCGCTGCCTCCCCCAGCGCTGCCCCCGTCATTGACACTCTTGCTGCTGGCTACGGAAAGGTCCTTGGTAAGGGTCGTCTCCCTCAAGTTCCTGTCATTGTTAAGGCACGTTTTGTCTCCAAGCTT…	OK	450	YES	CAG	Glutamine	Glutamine (CAG)
yHMPu5000038340_geotrichum_ghanensis_190924.g002682.m1	ATGCCTACCAGATTGACCAAGACCAGAAAGCTCAGAGGACACGTTTCCGCCGGTCACGGACGTATCGGAAAGCACAGAAAGCATCCCGGTGGTAGAGGTATGGCCGGTGGTCAACACCACCACCGTACCAACATGGATAAGTACCATCCTGGTTACTTCGGTAAGGTTGGTATGAGATACTTCCACAAGCAACAAAACCACTTCTGGAAGCCCGTTCTCAATCTTGATAAGTTGTGGACTTTGGTCCCTGAAGAGAACAGAGAGAAGTACATTGCTTCTGCCTCAGAATCTGCTGCCCCCGTTATTGACACCTTGGCTGCTGGTTACGGTAAGGTCCTTGGTAAGGGTCGTCTCCCTAACGTTCCTGTCATTGTCAAGGCCAGATTTGTCTCTGCTCTT…	ATGCCTACCAGATTGACCAAGACCAGAAAGCTCAGAGGACACGTTTCCGCCGGTCACGGACGTATCGGAAAGCACAGAAAGCATCCCGGTGGTAGAGGTATGGCCGGTGGTCAACACCACCACCGTACCAACATGGATAAGTACCATCCTGGTTACTTCGGTAAGGTTGGTATGAGATACTTCCACAAGCAACAAAACCACTTCTGGAAGCCCGTTCTCAATCTTGATAAGTTGTGGACTTTGGTCCCTGAAGAGAACAGAGAGAAGTACATTGCTTCTGCCTCAGAATCTGCTGCCCCCGTTATTGACACCTTGGCTGCTGGTTACGGTAAGGTCCTTGGTAAGGGTCGTCTCCCTAACGTTCCTGTCATTGTCAAGGCCAGATTTGTCTCTGCTCTT…	OK	450	YES	CAA	Glutamine	Glutamine (CAA)
yHMPu5000037876_geotrichum_fermentans_190924.g004165.m1	ATGCCTACCAGATTGACCAAGACCAGAAAGCTCAGAGGACACGTCTCCGCCGGTCACGGACGTATCGGCAAGCACAGAAAGCACCCCGGTGGTCGTGGTATGGCCGGTGGTCAGCACCATCACCGTACCAACATGGATAAGTACCATCCCGGTTACTTTGGTAAGGTTGGTATGAGACACTTCCACGTCCAGAACAACCGCTCTTGGAAGCCCGTGCTCAACCTCGACAAGCTGTGGACCCTTGTCCCCGCCGAGAACCGTGAGAAGTACATTGCTTCTGCCTCTGCTTCCGCCGCCCCTGTCATTGACACTCTGGCTGCTGGTTACGGCAAGGTGCTCGCTAAGGGCCGTCTCCCTAATGTTCCCGTGATTGTTAAGGCCAGATTTGTCTCCAAGTTG…	ATGCCTACCAGATTGACCAAGACCAGAAAGCTCAGAGGACACGTCTCCGCCGGTCACGGACGTATCGGCAAGCACAGAAAGCACCCCGGTGGTCGTGGTATGGCCGGTGGTCAGCACCATCACCGTACCAACATGGATAAGTACCATCCCGGTTACTTTGGTAAGGTTGGTATGAGACACTTCCACGTCCAGAACAACCGCTCTTGGAAGCCCGTGCTCAACCTCGACAAGCTGTGGACCCTTGTCCCCGCCGAGAACCGTGAGAAGTACATTGCTTCTGCCTCTGCTTCCGCCGCCCCTGTCATTGACACTCTGGCTGCTGGTTACGGCAAGGTGCTCGCTAAGGGCCGTCTCCCTAATGTTCCCGTGATTGTTAAGGCCAGATTTGTCTCCAAGTTG…	OK	450	YES	CAG	Glutamine	Glutamine (CAG)
yHMPu5000041820_geotrichum_histeridarum_201018.g003609.m1	ATGCCTACCAGATTGACCAAGACCAGAAAGCTCAGAGGACACGTCTCCGCCGGTCACGGACGTATCGGAAAGCACAGAAAGCATCCCGGTGGTCGTGGTATGGCCGGTGGTCAGCACCACCACCGTACCAACATGGACAAGTACCATCCCGGTTACTTTGGTAAGGTCGGTATGCGATACTTCCACAAGCAGCAGAACCACTTCTGGAAGCCTGTCCTGAACTTGGACAAGCTGTGGACCCTGGTCCCTGCCGAGAACAGAGAGAAGTACATTGCCTCTGCCTCGGAGTCTGCTGCCCCCGTCATTGACACTTTGGCTGCTGGCTACGGTAAGGTCCTGGGCAAGGGCCGTCTGCCCAACGTCCCCGTCATTGTCAAGGCCCGCTTCGTCTCCAAGCTC…	ATGCCTACCAGATTGACCAAGACCAGAAAGCTCAGAGGACACGTCTCCGCCGGTCACGGACGTATCGGAAAGCACAGAAAGCATCCCGGTGGTCGTGGTATGGCCGGTGGTCAGCACCACCACCGTACCAACATGGACAAGTACCATCCCGGTTACTTTGGTAAGGTCGGTATGCGATACTTCCACAAGCAGCAGAACCACTTCTGGAAGCCTGTCCTGAACTTGGACAAGCTGTGGACCCTGGTCCCTGCCGAGAACAGAGAGAAGTACATTGCCTCTGCCTCGGAGTCTGCTGCCCCCGTCATTGACACTTTGGCTGCTGGCTACGGTAAGGTCCTGGGCAAGGGCCGTCTGCCCAACGTCCCCGTCATTGTCAAGGCCCGCTTCGTCTCCAAGCTC…	OK	450	YES	CAG	Glutamine	Glutamine (CAG)
yHMPu5000038338_geotrichum_restrictum_190924_g006623.m1	ATGCCTACCAGATTGACCAAGACCAGAAAGCTCAGAGGACACGTCTCAGCCGGTCACGGACGTGTTGGAAAGCACAGAAAGCATCCCGGTGGTCGTGGTATGGCCGGTGGTCAGCACCATCACCGTACCAACATGGATAAGTACCATCCCGGTTACTTTGGTAAAGTTGGTATGAGATACTTCCACAAGCAACAGAACCACTTCTGGAAGCCCGTCCTTAACCTCGACAAGCTGTGGACCCTCGTCCCCGCTGAGCACAGAGAAAAGTACATTGCCTCTGCCTCCGAGTCCGCTGCTCCCGTCATTGACACTCTCGCTGCTGGTTTCGGAAAGGTCCTCGGTAAGGGTCGTCTGCCCAACGTTCCCGTCATTGTTAGAGCCCGATTTGTCTCCAAGCTC…	ATGCCTACCAGATTGACCAAGACCAGAAAGCTCAGAGGACACGTCTCAGCCGGTCACGGACGTGTTGGAAAGCACAGAAAGCATCCCGGTGGTCGTGGTATGGCCGGTGGTCAGCACCATCACCGTACCAACATGGATAAGTACCATCCCGGTTACTTTGGTAAAGTTGGTATGAGATACTTCCACAAGCAACAGAACCACTTCTGGAAGCCCGTCCTTAACCTCGACAAGCTGTGGACCCTCGTCCCCGCTGAGCACAGAGAAAAGTACATTGCCTCTGCCTCCGAGTCCGCTGCTCCCGTCATTGACACTCTCGCTGCTGGTTTCGGAAAGGTCCTCGGTAAGGGTCGTCTGCCCAACGTTCCCGTCATTGTTAGAGCCCGATTTGTCTCCAAGCTC…	OK	450	YES	CAG	Glutamine	Glutamine (CAG)
yHMPu5000038343_dipodascus_australiensis_170713.g004023.m1	ATGCCTACCAGATTGACCAAGACCAGAAAGCATAGAGGACACGTTACTGCCGGTTACGGACGTGTCGGTAAACACAGAAAGCATCCCGGTGGTCGTGGTATGGCCGGTGGTCAACACCACCACCGTACCAACATGGATAAATTCCATCCTGGTTACTTTGGTAAGGTTGGTATGAGATACTTCCACAAGCAACAAAACCACTTCTGGAAGCCTGTTGTCAACCTTGATAAGTTGTGGACTTTGGTTCCTGAAGAAAACAGAGAGAAGTACCTTGCTTCTGCCTCTGAATCCGCTGCTCCCGTTATTGACACCTTGGCTGCCGGTTACGGTAAGGTCCTCGGTAAGGGTCGTCTTCCTAACGTCCCTGTCATTGTTAAGGCTAGATTCGTCTCTGCTCTT…	ATGCCTACCAGATTGACCAAGACCAGAAAGCATAGAGGACACGTTACTGCCGGTTACGGACGTGTCGGTAAACACAGAAAGCATCCCGGTGGTCGTGGTATGGCCGGTGGTCAACACCACCACCGTACCAACATGGATAAATTCCATCCTGGTTACTTTGGTAAGGTTGGTATGAGATACTTCCACAAGCAACAAAACCACTTCTGGAAGCCTGTTGTCAACCTTGATAAGTTGTGGACTTTGGTTCCTGAAGAAAACAGAGAGAAGTACCTTGCTTCTGCCTCTGAATCCGCTGCTCCCGTTATTGACACCTTGGCTGCCGGTTACGGTAAGGTCCTCGGTAAGGGTCGTCTTCCTAACGTCCCTGTCATTGTTAAGGCTAGATTCGTCTCTGCTCTT…	OK	450	YES	CAA	Glutamine	Glutamine (CAA)
yHMPu5000040915_geotrichum_siamensis_201018.g003550.m1	ATGCCTACCAGATTGACCAAGACCAGAAAGCACAGAGGACACGTCTCCGCCGGTCACGGACGTATCGGAAAGCACAGAAAGAATCCCGGTGGTCGTGGTATGGCCGGTGGTCAACACCACCACCGTATCAACATGGATAAATACCATCCTGGTTACTTCGGTAAGGTTGGTATGAGATACTTCCACAAGCAACAAAACCACTTCTGGAAGCCCGTTCTCAACCTCGACAAATTGTGGACTCTCGTCCCCGCTGAGAACAGAGAGAAGTACATTGCTTCTGCTTCTGAATCTGCTGCCCCCGTTATTGATACCTTGGCTGCTGGTTACGGTAAGGTCCTTGGTAAGGGTCGTCTCCCTAACGTCCCCGTCATTGTCAAGGCCAGATTCGTTTCTGCTCTT…	ATGCCTACCAGATTGACCAAGACCAGAAAGCACAGAGGACACGTCTCCGCCGGTCACGGACGTATCGGAAAGCACAGAAAGAATCCCGGTGGTCGTGGTATGGCCGGTGGTCAACACCACCACCGTATCAACATGGATAAATACCATCCTGGTTACTTCGGTAAGGTTGGTATGAGATACTTCCACAAGCAACAAAACCACTTCTGGAAGCCCGTTCTCAACCTCGACAAATTGTGGACTCTCGTCCCCGCTGAGAACAGAGAGAAGTACATTGCTTCTGCTTCTGAATCTGCTGCCCCCGTTATTGATACCTTGGCTGCTGGTTACGGTAAGGTCCTTGGTAAGGGTCGTCTCCCTAACGTCCCCGTCATTGTCAAGGCCAGATTCGTTTCTGCTCTT…	OK	450	YES	CAA	Glutamine	Glutamine (CAA)
yHMPu5000034986_candida_oregonensis_160519_g000534.m1	ATGCCTACCAGATTGACCAAGACCAGAAAGCACAGAGGAAATGTTTCCGCCGGTAAGGGTAGAGTCGGTAAGCACAGAAAGCATCCCGGTGGACGTGGTAAGGCCGGTGGTCAGCACCACCACAGAATCAACATGGACAAGTACCACCCTGGTTACTTCGGAAAGGTTGGTATGAGATACTTCCACAAGCAGAGAAACCACTTCTGGAAGCCACAGATCAACTTGGAGAAGTTGTGGTCTTTGGTTGAGGAGGAGAAGAGAGACGAGTACTTGAAGTCCGCTTCTACCTCTGCTGCCCCAGTCATCGACACCTTGGCTCACGGTTACGGTATCGTTTTGGGTAAGGGCCAGTTGCCAAACGTCCCAGTCATTGTCAAGGCCAGATTTGTTTCCAAGTTG…	ATGCCTACCAGATTGACCAAGACCAGAAAGCACAGAGGAAATGTTTCCGCCGGTAAGGGTAGAGTCGGTAAGCACAGAAAGCATCCCGGTGGACGTGGTAAGGCCGGTGGTCAGCACCACCACAGAATCAACATGGACAAGTACCACCCTGGTTACTTCGGAAAGGTTGGTATGAGATACTTCCACAAGCAGAGAAACCACTTCTGGAAGCCACAGATCAACTTGGAGAAGTTGTGGTCTTTGGTTGAGGAGGAGAAGAGAGACGAGTACTTGAAGTCCGCTTCTACCTCTGCTGCCCCAGTCATCGACACCTTGGCTCACGGTTACGGTATCGTTTTGGGTAAGGGCCAGTTGCCAAACGTCCCAGTCATTGTCAAGGCCAGATTTGTTTCCAAGTTG…	OK	450	YES	CAG	Glutamine	Glutamine (CAG)
yHMPu5000034902_ogataea_minuta_160519.g005441.m1	ATGCCTACCAGATTGACCAAAACTAGAAAGCACAGAGGTAACGTTTCGGCCGGTAAGGGTCGTGTTGGAAAGCACAGAAAGCATCCCGGTGGAAGAGGTATGGCCGGTGGTCTGACCCACCACAGATCCAACTTGGACAAGTACCACCCAGGTTACTTTGGTAAGGTTGGTATGAGATACTTCCACAAGCAACAAACCCACTTCTGGAAACCAGTCATCAATCTTGACAAGCTCTGGTCGTTGGTGGAGAACAAGGATGAGAAGCTTGCTTCGAGTAGCAAGGACTCTGCTGTTGTCATCGACACTTTGGCCAGCGGATACGGAAAGGTCTTGGGTAAAGGAAGACTACCTGATGTCCCAGTTATTGTCAAGGCTAGATTTGTTTCGAAGTTGGCTGAG…	ATGCCTACCAGATTGACCAAAACTAGAAAGCACAGAGGTAACGTTTCGGCCGGTAAGGGTCGTGTTGGAAAGCACAGAAAGCATCCCGGTGGAAGAGGTATGGCCGGTGGTCTGACCCACCACAGATCCAACTTGGACAAGTACCACCCAGGTTACTTTGGTAAGGTTGGTATGAGATACTTCCACAAGCAACAAACCCACTTCTGGAAACCAGTCATCAATCTTGACAAGCTCTGGTCGTTGGTGGAGAACAAGGATGAGAAGCTTGCTTCGAGTAGCAAGGACTCTGCTGTTGTCATCGACACTTTGGCCAGCGGATACGGAAAGGTCTTGGGTAAAGGAAGACTACCTGATGTCCCAGTTATTGTCAAGGCTAGATTTGTTTCGAAGTTGGCTGAG…	OK	444	YES	CTG	Leucine1	Leucine1 (CTG)
yHMPu5000041719_saccharomycopsis_microspora_170912.g004564.m1	ATGCCTACCAGATTGACCAAAACTAGAAAGCACAGAGGAAATGTGTCGGCCGGTAAGGGTCGTATTGGGAAGCACAGAAAGCACCCAGGTGGTAGAGGTATGGCCGGTGGTCAGCACCACCACAGAATCAACATGGACAAGTACCACCCGGGTTACTTTGGTAAAGTTGGTATGAGATACTTCCACAAGCAGCAGAACCAGTTCTGGAAGCCTGTTGTTAACTTGGACAAGTTGTGGACCTTGGTTCCAGAGAGTCAGAGAGACAACTTGTTGAAGAGTGCTTCTGCTTCTTCTGCTCCAGTCATTGACACTTTGGCTGCTGGCTACGGGAAGGTTCTCGGTAAGGGTAGACTTCCTGAGGTGCCTGTGATTGTGAAGGCGAGATATGTTTCCAAATTG…	ATGCCTACCAGATTGACCAAAACTAGAAAGCACAGAGGAAATGTGTCGGCCGGTAAGGGTCGTATTGGGAAGCACAGAAAGCACCCAGGTGGTAGAGGTATGGCCGGTGGTCAGCACCACCACAGAATCAACATGGACAAGTACCACCCGGGTTACTTTGGTAAAGTTGGTATGAGATACTTCCACAAGCAGCAGAACCAGTTCTGGAAGCCTGTTGTTAACTTGGACAAGTTGTGGACCTTGGTTCCAGAGAGTCAGAGAGACAACTTGTTGAAGAGTGCTTCTGCTTCTTCTGCTCCAGTCATTGACACTTTGGCTGCTGGCTACGGGAAGGTTCTCGGTAAGGGTAGACTTCCTGAGGTGCCTGTGATTGTGAAGGCGAGATATGTTTCCAAATTG…	OK	450	YES	CAG	Glutamine	Glutamine (CAG)
yHMPu5000037874_dipodascus_aggregatus_190924.g000639.m1	ATGCCTACCAGATTGACCAAAACCAGAAAGCTTAGAGGCCACGTCTCAGCCGGTCACGGACGTGTTGGAAAGCACAGAAAGCATCCCGGTGGTCGTGGTATGGCCGGTGGTCAGCACCATCACCGTACCAACATGGATAAGTACCATCCCGGTTACTTTGGAAAGGTTGGTATGAGATACTTCCACAAGCAACAGAACCATTTCTGGAAGCCCGTCCTTAACTTGGACAAGCTGTGGACTCTTATCCCCGCCGAAAACAGAGAGAAGTACATTGCTTCTGCTTCTGAGTCTGCTGCTCCCGTCATTGACACTCTTGCTGCTGGTTTCGGAAAGGTCCTCGGTAAGGGTCGTTTGCCCAACGTTCCCGTCATTGTCAGAGCCAGATTTGTCTCCAAGCTC…	ATGCCTACCAGATTGACCAAAACCAGAAAGCTTAGAGGCCACGTCTCAGCCGGTCACGGACGTGTTGGAAAGCACAGAAAGCATCCCGGTGGTCGTGGTATGGCCGGTGGTCAGCACCATCACCGTACCAACATGGATAAGTACCATCCCGGTTACTTTGGAAAGGTTGGTATGAGATACTTCCACAAGCAACAGAACCATTTCTGGAAGCCCGTCCTTAACTTGGACAAGCTGTGGACTCTTATCCCCGCCGAAAACAGAGAGAAGTACATTGCTTCTGCTTCTGAGTCTGCTGCTCCCGTCATTGACACTCTTGCTGCTGGTTTCGGAAAGGTCCTCGGTAAGGGTCGTTTGCCCAACGTTCCCGTCATTGTCAGAGCCAGATTTGTCTCCAAGCTC…	OK	450	YES	CAG	Glutamine	Glutamine (CAG)
yHMPu5000035045_barnettozyma_hawaiiensis_160613.g002170.m1	ATGCCTACCAGATTGACAAAGACTAGAAAGCACAGAGGTCACGTTTCCGCCGGTAAGGGTCGTGTTGGTAAGCACAGAAAGCATCCAGGTGGTAGAGGTAAGGCCGGTGGTCAACATCACCACAGAACCAATTTGGATAAGTACCATCCAGGTTACTTCGGTAAGGTTGGTCAAAGATACTTCCACAAGCAACAATTGCACTTCTGGAAGCCAGTCTTGAACTTGGACAAGTTGTGGACTTTGGTTGAGGAGGACAAGAGAGAGCAATACTTGAAGTCCGCTTCTGCCTCCGCTGCCCCAGTTATTGACACCTTGGCCCACGGTTACGGTAAGGTTTTGGGTAAGGGTAGATTGCCAAACGTTCCAGTTATTGTTAAGGCCAGATTCGTTTCTGCTTTG…	ATGCCTACCAGATTGACAAAGACTAGAAAGCACAGAGGTCACGTTTCCGCCGGTAAGGGTCGTGTTGGTAAGCACAGAAAGCATCCAGGTGGTAGAGGTAAGGCCGGTGGTCAACATCACCACAGAACCAATTTGGATAAGTACCATCCAGGTTACTTCGGTAAGGTTGGTCAAAGATACTTCCACAAGCAACAATTGCACTTCTGGAAGCCAGTCTTGAACTTGGACAAGTTGTGGACTTTGGTTGAGGAGGACAAGAGAGAGCAATACTTGAAGTCCGCTTCTGCCTCCGCTGCCCCAGTTATTGACACCTTGGCCCACGGTTACGGTAAGGTTTTGGGTAAGGGTAGATTGCCAAACGTTCCAGTTATTGTTAAGGCCAGATTCGTTTCTGCTTTG…	OK	450	YES	CAA	Glutamine	Glutamine (CAA)
yHMPu5000035686_Cyberlindnera_saturnus_SPADES.g005562.m1	ATGCCTACCAGATTGACAAAGACTAGAAAACACAGAGGTCACGTTGTTGCCGGTAAGGGTAGAGTTGGTAAGCACAGAAAGCACCCGGGTGGTAGAGGTAAGGCCGGTGGTCAACACCACCACAGAACCAATTTGGATAAGTACCATCCAGGTTACTTCGGTAAGGTCGGTCAAAGATACTTCCATAAGCAACAACTCCACTTCTGGAAGCCAGTCTTGAACTTGGACAAGTTGTGGACTTTGGTTGAGGAGGAGAAGAGAGAGCAATACTTGTCCTCTGCTTCTGCCTCTGCTGCTCCAGTTATCGACACCTTGGCTGCCGGTTACGGTAAGGTTTTGGGTAAGGGTCGTTTGCCACAAGTTCCAGTCATCGTTAAGGCTAGATTTGTTTCCAAGTTG…	ATGCCTACCAGATTGACAAAGACTAGAAAACACAGAGGTCACGTTGTTGCCGGTAAGGGTAGAGTTGGTAAGCACAGAAAGCACCCGGGTGGTAGAGGTAAGGCCGGTGGTCAACACCACCACAGAACCAATTTGGATAAGTACCATCCAGGTTACTTCGGTAAGGTCGGTCAAAGATACTTCCATAAGCAACAACTCCACTTCTGGAAGCCAGTCTTGAACTTGGACAAGTTGTGGACTTTGGTTGAGGAGGAGAAGAGAGAGCAATACTTGTCCTCTGCTTCTGCCTCTGCTGCTCCAGTTATCGACACCTTGGCTGCCGGTTACGGTAAGGTTTTGGGTAAGGGTCGTTTGCCACAAGTTCCAGTCATCGTTAAGGCTAGATTTGTTTCCAAGTTG…	OK	450	YES	CAA	Glutamine	Glutamine (CAA)
yHMPu5000034978_cyberlindnera_mrakii_160519.g001503.m1	ATGCCTACCAGATTGACAAAGACTAGAAAACACAGAGGTCACGTTGTTGCCGGTAAGGGTAGAGTTGGTAAGCACAGAAAGCACCCGGGTGGTAGAGGTAAGGCCGGTGGTCAACACCACCACAGAACCAACTTGGATAAGTACCATCCAGGTTACTTCGGTAAGGTTGGTCAAAGATACTTCCACAAGCAACAACTCCACTTCTGGAAGCCAGTCTTGAACTTGGACAAGTTGTGGACTTTGGTTGAGGAGGAGAAGAGAGAGCAATACTTGTCCTCTGCTTCTGCCTCTGCTGCTCCAGTCATCGACACCTTGGCTGCCGGTTACGGTAAGGTTTTGGGTAAAGGTCGTTTGCCACAAGTTCCAGTTATCGTCAAGGCCAGATTTGTTTCCAAGTTG…	ATGCCTACCAGATTGACAAAGACTAGAAAACACAGAGGTCACGTTGTTGCCGGTAAGGGTAGAGTTGGTAAGCACAGAAAGCACCCGGGTGGTAGAGGTAAGGCCGGTGGTCAACACCACCACAGAACCAACTTGGATAAGTACCATCCAGGTTACTTCGGTAAGGTTGGTCAAAGATACTTCCACAAGCAACAACTCCACTTCTGGAAGCCAGTCTTGAACTTGGACAAGTTGTGGACTTTGGTTGAGGAGGAGAAGAGAGAGCAATACTTGTCCTCTGCTTCTGCCTCTGCTGCTCCAGTCATCGACACCTTGGCTGCCGGTTACGGTAAGGTTTTGGGTAAAGGTCGTTTGCCACAAGTTCCAGTTATCGTCAAGGCCAGATTTGTTTCCAAGTTG…	OK	450	YES	CAA	Glutamine	Glutamine (CAA)
yHMPu5000035324_cyberlindnera_subsufficiens_A3_201018.g000357.m1	ATGCCTACCAGATTGACAAAGACTAGAAAACACAGAGGTCACGTTGTTGCCGGTAAGGGTAGAGTTGGTAAGCACAGAAAGCACCCGGGTGGTAGAGGTAAGGCCGGTGGTCAACACCACCACAGAACCAACTTGGATAAGTACCATCCAGGTTACTTCGGTAAGGTTGGTCAAAGATACTTCCACAAGCAACAACTCCACTTCTGGAAGCCAGTCTTGAACTTGGACAAGTTGTGGACTTTGGTTGAGGAGGAGAAGAGAGAGCAATACTTGTCTTCTGCTTCCGCCTCTGCTGCTCCAGTTATTGACACCTTGGCTGCCGGTTACGGTAAGGTTTTGGGTAAGGGTCGTTTGCCACAAGTTCCAGTCATCGTCAAGGCCAGATTTGTTTCCAAGTTG…	ATGCCTACCAGATTGACAAAGACTAGAAAACACAGAGGTCACGTTGTTGCCGGTAAGGGTAGAGTTGGTAAGCACAGAAAGCACCCGGGTGGTAGAGGTAAGGCCGGTGGTCAACACCACCACAGAACCAACTTGGATAAGTACCATCCAGGTTACTTCGGTAAGGTTGGTCAAAGATACTTCCACAAGCAACAACTCCACTTCTGGAAGCCAGTCTTGAACTTGGACAAGTTGTGGACTTTGGTTGAGGAGGAGAAGAGAGAGCAATACTTGTCTTCTGCTTCCGCCTCTGCTGCTCCAGTTATTGACACCTTGGCTGCCGGTTACGGTAAGGTTTTGGGTAAGGGTCGTTTGCCACAAGTTCCAGTCATCGTCAAGGCCAGATTTGTTTCCAAGTTG…	OK	450	YES	CAA	Glutamine	Glutamine (CAA)
yHMPu5000034966_cyberlindnera_sargentensis_160519.g000247.m1	ATGCCTACCAGATTGACAAAGACTAGAAAACACAGAGGTCACGTTGTTGCCGGTAAGGGTAGAGTTGGTAAGCACAGAAAGCACCCGGGTGGTAGAGGTAAGGCCGGTGGTCAACACCACCACAGAACCAACTTGGATAAGTACCATCCAGGTTACTTCGGTAAGGTTGGTCAAAGATACTTCCACAAGCAACAACTCCACTTCTGGAAACCAGTCTTGAACTTGGACAAGTTGTGGACTTTGGTTGAGGAGGAGAAGAGAGAGCAATACTTGTCCTCTGCTTCTGCCTCTGCTGCTCCAGTCATCGACACCTTGGCTGCCGGTTACGGTAAGGTTTTGGGTAAGGGTCGTTTGCCACAAGTTCCAGTTATCGTCAAGGCCAGATTTGTTTCTAAGTTG…	ATGCCTACCAGATTGACAAAGACTAGAAAACACAGAGGTCACGTTGTTGCCGGTAAGGGTAGAGTTGGTAAGCACAGAAAGCACCCGGGTGGTAGAGGTAAGGCCGGTGGTCAACACCACCACAGAACCAACTTGGATAAGTACCATCCAGGTTACTTCGGTAAGGTTGGTCAAAGATACTTCCACAAGCAACAACTCCACTTCTGGAAACCAGTCTTGAACTTGGACAAGTTGTGGACTTTGGTTGAGGAGGAGAAGAGAGAGCAATACTTGTCCTCTGCTTCTGCCTCTGCTGCTCCAGTCATCGACACCTTGGCTGCCGGTTACGGTAAGGTTTTGGGTAAGGGTCGTTTGCCACAAGTTCCAGTTATCGTCAAGGCCAGATTTGTTTCTAAGTTG…	OK	450	YES	CAA	Glutamine	Glutamine (CAA)
yHMPu5000035687_cyberlindnera_suaveolens_160613.g003273.m1	ATGCCTACCAGATTGACAAAGACTAGAAAACACAGAGGTCACGTTGTTGCCGGTAAGGGTAGAGTTGGTAAGCACAGAAAGCACCCGGGTGGTAGAGGTAAGGCCGGTGGTCAACACCACCACAGAACCAACTTGGATAAGTACCATCCAGGTTACTTCGGTAAGGTCGGTCAAAGATACTTCCACAAGCAACAACTCCACTTCTGGAAGCCAGTCTTGAACTTGGACAAGTTGTGGACTTTGGTTGAGGAGGAGAAGAGAGAGCAATACTTGTCCTCTGCTTCCGCCTCTGCTGCTCCAGTTATCGACACCTTGGCTGCCGGTTACGGTAAGGTTTTGGGTAAGGGTCGTTTGCCACAAGTTCCAGTCATCGTCAAGGCCAGATTTGTTTCCAAGTTG…	ATGCCTACCAGATTGACAAAGACTAGAAAACACAGAGGTCACGTTGTTGCCGGTAAGGGTAGAGTTGGTAAGCACAGAAAGCACCCGGGTGGTAGAGGTAAGGCCGGTGGTCAACACCACCACAGAACCAACTTGGATAAGTACCATCCAGGTTACTTCGGTAAGGTCGGTCAAAGATACTTCCACAAGCAACAACTCCACTTCTGGAAGCCAGTCTTGAACTTGGACAAGTTGTGGACTTTGGTTGAGGAGGAGAAGAGAGAGCAATACTTGTCCTCTGCTTCCGCCTCTGCTGCTCCAGTTATCGACACCTTGGCTGCCGGTTACGGTAAGGTTTTGGGTAAGGGTCGTTTGCCACAAGTTCCAGTCATCGTCAAGGCCAGATTTGTTTCCAAGTTG…	OK	450	YES	CAA	Glutamine	Glutamine (CAA)
yHMPu5000038408_candida_borneonana_170713.g003653.m1	ATGCCTACCAGATTGACAAAGACTAGAAAACACAGAGGTCACACTGTTGCCGGTAAGGGTCGTGTTGGTAAGCACAGAAAGCATCCCGGTGGTCGTGGTATGGCTGGTGGTTTGACTCACCACAGATCTAACTTGGACAAGTACCATCCTGGTTACTTCGGTAAGGTCGGTATGAGATACTTCCACAAGCAACAAAACCACTTCTGGGCCCCAGTGATCAACCTCGACAAGTTGTGGACTTTGGTGCCAGAGGAGAACAAGGAGGCTGCTCTCAAGAGCACTTCTTCTTCTGCCGTTGTCATTGACACTTTGGCCTCCGGTTACGGTAAGGTCTTGGGTAAGGGAAAGCTCCCAGAGGTTCCAGTCATCGTTAAGGCCAGATACGTTTCTAAGTTGGCT…	ATGCCTACCAGATTGACAAAGACTAGAAAACACAGAGGTCACACTGTTGCCGGTAAGGGTCGTGTTGGTAAGCACAGAAAGCATCCCGGTGGTCGTGGTATGGCTGGTGGTTTGACTCACCACAGATCTAACTTGGACAAGTACCATCCTGGTTACTTCGGTAAGGTCGGTATGAGATACTTCCACAAGCAACAAAACCACTTCTGGGCCCCAGTGATCAACCTCGACAAGTTGTGGACTTTGGTGCCAGAGGAGAACAAGGAGGCTGCTCTCAAGAGCACTTCTTCTTCTGCCGTTGTCATTGACACTTTGGCCTCCGGTTACGGTAAGGTCTTGGGTAAGGGAAAGCTCCCAGAGGTTCCAGTCATCGTTAAGGCCAGATACGTTTCTAAGTTGGCT…	OK	447	YES	TTG	Leucine2	Leucine2 (TTG)
yHMPu5000035292_sporopachydermia_cereana_201018.haplomerger2.g005314.m1	ATGCCTACCAGATTGACAAAGACAAGAAAGCACCGTGGCCACGTTACGGCCGGTTACGGTCGTATCGGAAAGCACAGAAAGTCTCCTGGTGGTAGAGGTATGGCTGGTGGTCAACACCACCACAGAACCAACTTGGATAAGTACCATCCCGGTTACTTCGGTAAGGTTGGTATGAGATACTTCCACAAACAACAGGCTCACTTCTGGAAGCCCATCATCAACCTCGACAAGCTGTGGACTTTGATCCCTGCCGAATCCAGAGAAAAATATCTGTCCTCTGCCTCCACTGATGCTGCCCCTGTCATTGACACTCTGGCTGCTGGTTATGGTAAGGTTCTGGGCAAGGGAAGACTTCCTAATGTTCCTGTCATTGTTAAGGCCAGATTTGTCTCCAAGTTG…	ATGCCTACCAGATTGACAAAGACAAGAAAGCACCGTGGCCACGTTACGGCCGGTTACGGTCGTATCGGAAAGCACAGAAAGTCTCCTGGTGGTAGAGGTATGGCTGGTGGTCAACACCACCACAGAACCAACTTGGATAAGTACCATCCCGGTTACTTCGGTAAGGTTGGTATGAGATACTTCCACAAACAACAGGCTCACTTCTGGAAGCCCATCATCAACCTCGACAAGCTGTGGACTTTGATCCCTGCCGAATCCAGAGAAAAATATCTGTCCTCTGCCTCCACTGATGCTGCCCCTGTCATTGACACTCTGGCTGCTGGTTATGGTAAGGTTCTGGGCAAGGGAAGACTTCCTAATGTTCCTGTCATTGTTAAGGCCAGATTTGTCTCCAAGTTG…	OK	450	YES	CAA	Glutamine	Glutamine (CAA)
yHMPu5000037882_candida_sorboxylosa_180604.haplomerger2.g003857.m1	ATGCCTACCAGATTCTCTAAGACTAGAAAGCACAGAGGTAACGTGTGTGCCGGTAAGGGTCGTGTTGGTAAACACAGAAAGCATCCGGGTGGTAGAGGTATGGCCGGTGGTCAACATCACCACAGAACCAACTTAGACAAGTACCACCCAGGTTACTTTGGTAAGGTTGGTATGAGATACTTCCACAAACAAAAGAACCACTTCTGGGCTCCAGTCATCAACGTTGAAAAGTTATGGTCTTTAGTTGAAAACAAGGACGAAAAGCTTGCTTCTTCCACCAAGGAAGCTGCTGTTGTCATTGACACCTTAGCTGCTGGTTACGGTAAAGTCTTAGGTAAGGGTTCCCTTCCAAATGTTCCATTTATCGTTAAGTGTAGAGAAATCACCAAGTTAGCTGAA…	ATGCCTACCAGATTCTCTAAGACTAGAAAGCACAGAGGTAACGTGTGTGCCGGTAAGGGTCGTGTTGGTAAACACAGAAAGCATCCGGGTGGTAGAGGTATGGCCGGTGGTCAACATCACCACAGAACCAACTTAGACAAGTACCACCCAGGTTACTTTGGTAAGGTTGGTATGAGATACTTCCACAAACAAAAGAACCACTTCTGGGCTCCAGTCATCAACGTTGAAAAGTTATGGTCTTTAGTTGAAAACAAGGACGAAAAGCTTGCTTCTTCCACCAAGGAAGCTGCTGTTGTCATTGACACCTTAGCTGCTGGTTACGGTAAAGTCTTAGGTAAGGGTTCCCTTCCAAATGTTCCATTTATCGTTAAGTGTAGAGAAATCACCAAGTTAGCTGAA…	OK	444	YES	CAA	Glutamine	Glutamine (CAA)
saprochaete_ingens_g002184.m18	ATGCCTACCAGATTCTCTAAGACCAGAAAGCACAGAGGCCACGTCTCCGCCGGTTACGGTCGTATTGGCAAGCACCGCAAGAATCCCGGTGGTCGTGGTATGGCCGGTGGTCAGCACCACCACAGAACCAACCTCGACAAGTACCACCCTGGTTACTTTGGTAAGGTCGGTATGAGATACTTCCACAAGCAGCAGAACCACTTCTGGAGACCCGTCATTAACGTCGAGCGTCTGTGGACTCTTGTTCCTGAGGAGAAGAGAGAGAAGTACCTTAAGGAGTCTTCCTCGAGCGCTGCCCCCGTCATTGACACTCTTGCTCTTGGTTACGGCAAGGTTCTTGGCAAGGGTGCTCTTCCCAAGGTCCCCATCATTGTCAAGGCCCGCTTTGTCTCTGCTGAG…	ATGCCTACCAGATTCTCTAAGACCAGAAAGCACAGAGGCCACGTCTCCGCCGGTTACGGTCGTATTGGCAAGCACCGCAAGAATCCCGGTGGTCGTGGTATGGCCGGTGGTCAGCACCACCACAGAACCAACCTCGACAAGTACCACCCTGGTTACTTTGGTAAGGTCGGTATGAGATACTTCCACAAGCAGCAGAACCACTTCTGGAGACCCGTCATTAACGTCGAGCGTCTGTGGACTCTTGTTCCTGAGGAGAAGAGAGAGAAGTACCTTAAGGAGTCTTCCTCGAGCGCTGCCCCCGTCATTGACACTCTTGCTCTTGGTTACGGCAAGGTTCTTGGCAAGGGTGCTCTTCCCAAGGTCCCCATCATTGTCAAGGCCCGCTTTGTCTCTGCTGAG…	OK	450	YES	CAG	Glutamine	Glutamine (CAG)
magnusiomyces_ingens_g004605.m1	ATGCCTACCAGATTCTCTAAGACCAGAAAGCACAGAGGCCACGTCTCCGCCGGTTACGGTCGTATTGGCAAGCACCGCAAGAATCCCGGTGGTCGTGGTATGGCCGGTGGTCAGCACCACCACAGAACCAACCTCGACAAGTACCACCCTGGTTACTTCGGTAAGGTCGGTATGAGATACTTCCACAAGCAGCAGAACCACTTCTGGAGACCCGTCATCAACGTCGAGCGTCTGTGGACTCTTGTTCCTGAGGAGAAGAGAGAGAAGTACCTCAAGGAGGCTTCCTCGAGCGCTGCCCCCGTCATTGACACTCTTGCTCTTGGTTACGGCAAGGTTCTTGGCAAGGGTGCTCTTCCCAAGGTCCCCATCATTGTCAAGGCCCGTTTCGTCTCTGCTGAG…	ATGCCTACCAGATTCTCTAAGACCAGAAAGCACAGAGGCCACGTCTCCGCCGGTTACGGTCGTATTGGCAAGCACCGCAAGAATCCCGGTGGTCGTGGTATGGCCGGTGGTCAGCACCACCACAGAACCAACCTCGACAAGTACCACCCTGGTTACTTCGGTAAGGTCGGTATGAGATACTTCCACAAGCAGCAGAACCACTTCTGGAGACCCGTCATCAACGTCGAGCGTCTGTGGACTCTTGTTCCTGAGGAGAAGAGAGAGAAGTACCTCAAGGAGGCTTCCTCGAGCGCTGCCCCCGTCATTGACACTCTTGCTCTTGGTTACGGCAAGGTTCTTGGCAAGGGTGCTCTTCCCAAGGTCCCCATCATTGTCAAGGCCCGTTTCGTCTCTGCTGAG…	OK	450	YES	CAG	Glutamine	Glutamine (CAG)
saprochaete_suaveolens_g004863.m1	ATGCCTACCAGATTCTCTAAGACCAGAAAGCACAGAGGACACGTTTCCGCCGGTTACGGTCGTATTGGCAAGCACCGCAAGAATCCCGGTGGTCGTGGTATGGCCGGTGGTCAACACCACCACCGTACTAACCTCGACAAGTATCATCCCGGTTACTTCGGTAAGGTTGGTATGAGATACTTCCACAAGCAACAAAACCACTTCTGGAGACCTGTTATCAACGTCGAGAGCCTCTGGACTCTTGTTCCTGAAGAGAAGCGTGCTCAGTACTCCAAGGAGGCCTCTTCTTCTTCTGCCCCCGTTATCGACACTCTCGCTGCCGGTTACGGTAAGGTTCTTGGCAAGGGTTTCCTTCCTAAGATCCCCGTCATTGTCAAGGCTAGATTCGTTTCTGCTGAA…	ATGCCTACCAGATTCTCTAAGACCAGAAAGCACAGAGGACACGTTTCCGCCGGTTACGGTCGTATTGGCAAGCACCGCAAGAATCCCGGTGGTCGTGGTATGGCCGGTGGTCAACACCACCACCGTACTAACCTCGACAAGTATCATCCCGGTTACTTCGGTAAGGTTGGTATGAGATACTTCCACAAGCAACAAAACCACTTCTGGAGACCTGTTATCAACGTCGAGAGCCTCTGGACTCTTGTTCCTGAAGAGAAGCGTGCTCAGTACTCCAAGGAGGCCTCTTCTTCTTCTGCCCCCGTTATCGACACTCTCGCTGCCGGTTACGGTAAGGTTCTTGGCAAGGGTTTCCTTCCTAAGATCCCCGTCATTGTCAAGGCTAGATTCGTTTCTGCTGAA…	OK	450	YES	CAA	Glutamine	Glutamine (CAA)
yHMPu5000035627_zygosaccharomyces_pseudobailii_201018.haplomerger2.g003714.m1	ATGCCTACCAGATTCTCCCAGACTAGAAAGCACAGAGGTCACATCTCAGCCGGTTACGGTCGTGTTGGTAAGCACAGAAAGCACCCTGGTGGTAAGGGTATGGCCGGTGGTCAGCACCACCACAGAACCAACTTGGACAGATTCCACCCTGGTTACTTCGGTAAGGTTGGTATGAGATACTTCCGTATCCAAGGCAACCACTTCTGGAAGCCAGTTTTGAACTTGGACAAATTGTGGACCCTAGTGCCAGAAGAGAAGAGAGACCAATATTTGCAGTCTGCCTCCAAGAGCAATGCTCCTGTCATTGACACCTTGGCTGCCGGCTACGGTAAGGTCTTGGGTAAGGGTAGAATTCCTCAAGTTCCTGTCATTGTCAAGGCTAGATTCGTCTCCAAGTTG…	ATGCCTACCAGATTCTCCCAGACTAGAAAGCACAGAGGTCACATCTCAGCCGGTTACGGTCGTGTTGGTAAGCACAGAAAGCACCCTGGTGGTAAGGGTATGGCCGGTGGTCAGCACCACCACAGAACCAACTTGGACAGATTCCACCCTGGTTACTTCGGTAAGGTTGGTATGAGATACTTCCGTATCCAAGGCAACCACTTCTGGAAGCCAGTTTTGAACTTGGACAAATTGTGGACCCTAGTGCCAGAAGAGAAGAGAGACCAATATTTGCAGTCTGCCTCCAAGAGCAATGCTCCTGTCATTGACACCTTGGCTGCCGGCTACGGTAAGGTCTTGGGTAAGGGTAGAATTCCTCAAGTTCCTGTCATTGTCAAGGCTAGATTCGTCTCCAAGTTG…	OK	450	YES	CAG	Glutamine	Glutamine (CAG)
zygosaccharomyces_bailii_g002756.m1	ATGCCTACCAGATTCTCCCAGACTAGAAAGCACAGAGGTCACATCTCAGCCGGTTACGGTCGTGTTGGTAAGCACAGAAAGCACCCTGGTGGTAAGGGTATGGCCGGTGGTCAGCACCACCACAGAACCAACTTGGACAGATTCCACCCTGGTTACTTCGGTAAGGTTGGTATGAGATACTTCCGTATCCAAGGCAACCACTTCTGGAAGCCAGTTTTGAACTTGGACAAATTGTGGACCCTAGTGCCAGAAGAGAAGAGAGACCAATATTTGCAGTCTGCCTCCAAGAGCAATGCTCCTGTCATTGACACCTTGGCTGCCGGCTACGGTAAGGTCTTGGGTAAGGGTAGAATTCCTCAAGTTCCTGTCATTGTCAAGGCTAGATTCGTCTCCAAGTTG…	ATGCCTACCAGATTCTCCCAGACTAGAAAGCACAGAGGTCACATCTCAGCCGGTTACGGTCGTGTTGGTAAGCACAGAAAGCACCCTGGTGGTAAGGGTATGGCCGGTGGTCAGCACCACCACAGAACCAACTTGGACAGATTCCACCCTGGTTACTTCGGTAAGGTTGGTATGAGATACTTCCGTATCCAAGGCAACCACTTCTGGAAGCCAGTTTTGAACTTGGACAAATTGTGGACCCTAGTGCCAGAAGAGAAGAGAGACCAATATTTGCAGTCTGCCTCCAAGAGCAATGCTCCTGTCATTGACACCTTGGCTGCCGGCTACGGTAAGGTCTTGGGTAAGGGTAGAATTCCTCAAGTTCCTGTCATTGTCAAGGCTAGATTCGTCTCCAAGTTG…	OK	450	YES	CAG	Glutamine	Glutamine (CAG)
yHMPu5000037834_zygosaccharomyces_parabailii_190924.haplomerger2.g004025.m1	ATGCCTACCAGATTCTCCCAGACTAGAAAGCACAGAGGTCACATCTCAGCCGGTTACGGTCGTGTCGGTAAGCACAGAAAGCACCCTGGTGGTAAGGGTATGGCCGGTGGTCAGCACCACCACAGAACCAACTTGGACAGATTCCACCCTGGTTACTTCGGTAAGGTTGGTATGAGATACTTCCGTATCCAAGGCAACCACTTTTGGAAGCCAGTTTTGAACTTGGACAAATTGTGGACTCTAGTGCCAGAAGAGAAGAGAGACCAGTACTTACAGTCTGCCTCCAAGAGCAATGCTCCTGTCATTGACACTTTGGCTGCCGGCTATGGTAAGGTCTTGGGTAAGGGTAGAATTCCTCAAGTTCCTGTCATTGTCAAGGCCAGATTCGTCTCCAAGTTG…	ATGCCTACCAGATTCTCCCAGACTAGAAAGCACAGAGGTCACATCTCAGCCGGTTACGGTCGTGTCGGTAAGCACAGAAAGCACCCTGGTGGTAAGGGTATGGCCGGTGGTCAGCACCACCACAGAACCAACTTGGACAGATTCCACCCTGGTTACTTCGGTAAGGTTGGTATGAGATACTTCCGTATCCAAGGCAACCACTTTTGGAAGCCAGTTTTGAACTTGGACAAATTGTGGACTCTAGTGCCAGAAGAGAAGAGAGACCAGTACTTACAGTCTGCCTCCAAGAGCAATGCTCCTGTCATTGACACTTTGGCTGCCGGCTATGGTAAGGTCTTGGGTAAGGGTAGAATTCCTCAAGTTCCTGTCATTGTCAAGGCCAGATTCGTCTCCAAGTTG…	OK	450	YES	CAG	Glutamine	Glutamine (CAG)
yHMPu5000034630_Magnusiomyces_magnusii_S134_MASURCA.haplomerger2.g003212.m1	ATGCCTACCAGATTCTCCAAGACCAGAAAGCATAGAGGAAACGTTTCCGCCGGTTACGGTCGTGTTGGCAAGCACCGCAAGAATCCTGGTGGTCGTGGTATGGCCGGTGGTCAGCACCATCACCGTACTAACCTTGATAAGTACCATCCCGGTTACTTTGGTAAGGTCGGTATGAGATACTTCCACAAGCAACAAAACCATTTCTGGAGACCCGTCATCAACGTCGAGAGCCTTTGGACTCTTGTCCCCGAAGAAAAGCGTGACCAATACGTCAAGGAAGCTTCTTCTTCTGCCGCCCCCGTTATTGACACCCTCGCTGCTGGCTACGGTAAGGTCCTTGGTAAGGGTTTCCTTCCTAAGATTCCTGTCATTGTCAAGGCTAGATTTGTTTCTGCTGAA…	ATGCCTACCAGATTCTCCAAGACCAGAAAGCATAGAGGAAACGTTTCCGCCGGTTACGGTCGTGTTGGCAAGCACCGCAAGAATCCTGGTGGTCGTGGTATGGCCGGTGGTCAGCACCATCACCGTACTAACCTTGATAAGTACCATCCCGGTTACTTTGGTAAGGTCGGTATGAGATACTTCCACAAGCAACAAAACCATTTCTGGAGACCCGTCATCAACGTCGAGAGCCTTTGGACTCTTGTCCCCGAAGAAAAGCGTGACCAATACGTCAAGGAAGCTTCTTCTTCTGCCGCCCCCGTTATTGACACCCTCGCTGCTGGCTACGGTAAGGTCCTTGGTAAGGGTTTCCTTCCTAAGATTCCTGTCATTGTCAAGGCTAGATTTGTTTCTGCTGAA…	OK	450	YES	CAG	Glutamine	Glutamine (CAG)
nadsonia_fulvescens.g003095.m1	ATGCCTACCAGATTCTCCAACACCAGAAAGCACAGAGGTAACGTTTCCGCCGGTTACGGTCGTGTCGGTAAGCACAGAAAGTCTCCCGGTGGTAGAGGTATGGCCGGTGGTCAACACCATCACAGAACCAATTTGGATAAGTACCATCCTGGTTACTTCGGTAAGGTTGGTATGAGATACTTCCACAAGCAACAAAATCACTTCTGGAAGCCTGTTCTTAACCTCGACAAGCTCTGGTCCCTTGTTGCCACTGAAGACAGAGAAAAGTACCTTTCCAACACTGATGCCAGTGCCGTCCCCGTCATCGATACCCTCGCTGCCGGTTTCGGTAAGGTTCTCGGTAAGGGTCGTCTTCCTAACGTTCCCGTCATCGTCAAGGCCAGATTCGTTTCCAAGCTC…	ATGCCTACCAGATTCTCCAACACCAGAAAGCACAGAGGTAACGTTTCCGCCGGTTACGGTCGTGTCGGTAAGCACAGAAAGTCTCCCGGTGGTAGAGGTATGGCCGGTGGTCAACACCATCACAGAACCAATTTGGATAAGTACCATCCTGGTTACTTCGGTAAGGTTGGTATGAGATACTTCCACAAGCAACAAAATCACTTCTGGAAGCCTGTTCTTAACCTCGACAAGCTCTGGTCCCTTGTTGCCACTGAAGACAGAGAAAAGTACCTTTCCAACACTGATGCCAGTGCCGTCCCCGTCATCGATACCCTCGCTGCCGGTTTCGGTAAGGTTCTCGGTAAGGGTCGTCTTCCTAACGTTCCCGTCATCGTCAAGGCCAGATTCGTTTCCAAGCTC…	OK	450	YES	CAA	Glutamine	Glutamine (CAA)
yHMPu5000034635_nadsonia_fulvescens_160519.g000043.m1	ATGCCTACCAGATTCTCCAACACCAGAAAGCACAGAGGTAACGTTTCCGCCGGTTACGGTCGTGTCGGTAAGCACAGAAAGTCTCCCGGTGGTAGAGGTATGGCCGGTGGTCAACACCATCACAGAACCAATTTGGATAAGTACCATCCTGGTTACTTCGGTAAGGTTGGTATGAGATACTTCCACAAGCAACAAAACCACTTCTGGAAGCCTGTTCTTAACCTCGACAAGCTCTGGTCCCTTGTTGCCACTGAAGACAGAGAAAAGTACCTTTCCAACACTGACGCCGCCGCCGTCCCCGTCATCGATACTCTCGCTGCCGGTTTCGGTAAGGTTCTCGGTAAGGGTCGTCTTCCTAACGTCCCCGTCATCGTCAAGGCCAGATTCGTTTCCAAGCTC…	ATGCCTACCAGATTCTCCAACACCAGAAAGCACAGAGGTAACGTTTCCGCCGGTTACGGTCGTGTCGGTAAGCACAGAAAGTCTCCCGGTGGTAGAGGTATGGCCGGTGGTCAACACCATCACAGAACCAATTTGGATAAGTACCATCCTGGTTACTTCGGTAAGGTTGGTATGAGATACTTCCACAAGCAACAAAACCACTTCTGGAAGCCTGTTCTTAACCTCGACAAGCTCTGGTCCCTTGTTGCCACTGAAGACAGAGAAAAGTACCTTTCCAACACTGACGCCGCCGCCGTCCCCGTCATCGATACTCTCGCTGCCGGTTTCGGTAAGGTTCTCGGTAAGGGTCGTCTTCCTAACGTCCCCGTCATCGTCAAGGCCAGATTCGTTTCCAAGCTC…	OK	450	YES	CAA	Glutamine	Glutamine (CAA)
yHMPu5000035308_nadsonia_starkeyi-henricii_180604.g000301.m1	ATGCCTACCAGATTCTCCAACACCAGAAAGCACAGAGGTAACGTTTCCGCCGGTTACGGTCGTGTCGGTAAGCACAGAAAGTCTCCCGGTGGTAGAGGTATGGCCGGTGGTCAACACCATCACAGAACCAATTTGGATAAGTACCATCCTGGTTACTTCGGTAAGGTCGGTATGAGATACTTCCACAAGCAACAAAACCACTTCTGGAAGCCCGTTCTTAACCTTGATAAGCTCTGGTCCCTTGTTGCCGTCGAAGACCGTGAAAAGTACCTCGCCAACACCGACGCCTCTGCTGTCCCCGTCATCGATACCCTCGCTGCCGGTTTCGGTAAGGTCCTCGGTAAGGGTCGTCTTCCTAACGTCCCCGTCATCGTTAAGGCCAGATTCGTTTCCAAGCTT…	ATGCCTACCAGATTCTCCAACACCAGAAAGCACAGAGGTAACGTTTCCGCCGGTTACGGTCGTGTCGGTAAGCACAGAAAGTCTCCCGGTGGTAGAGGTATGGCCGGTGGTCAACACCATCACAGAACCAATTTGGATAAGTACCATCCTGGTTACTTCGGTAAGGTCGGTATGAGATACTTCCACAAGCAACAAAACCACTTCTGGAAGCCCGTTCTTAACCTTGATAAGCTCTGGTCCCTTGTTGCCGTCGAAGACCGTGAAAAGTACCTCGCCAACACCGACGCCTCTGCTGTCCCCGTCATCGATACCCTCGCTGCCGGTTTCGGTAAGGTCCTCGGTAAGGGTCGTCTTCCTAACGTCCCCGTCATCGTTAAGGCCAGATTCGTTTCCAAGCTT…	OK	450	YES	CAA	Glutamine	Glutamine (CAA)
komagataella_phaffi_g002318.m1	ATGCCTACCAGATTCTCAGCAACCAGAAAGCACAGAGGTAATGTCTCTGCCGGTAAAGGTCGTGTTGGTAAGCACAGAAAGCATCCCGGTGGTCGTGGTAAGGCCGGTGGTCAACACCACCACAGAACCAACATGGACAAGTACCATCCAGGTTACTTCGGAAAGGTTGGTATGAGACACTTCCGTTTACAACAAGCTCGTTACTGGCGCCCAGTAATTAACATCCAGAACTTGTGGTCTTTGATTCCTGAAGAGAAGAGAGAAGATGCTTTGAAGAACTCTTCTGCTTCTTCTGCCGTCGTTATTGACACTTTGGCCAATGGTTATGGTAAGGTCCTTGGTAAGGGTTCTTTGCCAAACATCCCAATTATCGTCAAGGCTAGATTTGTTTCCAAGGAG…	ATGCCTACCAGATTCTCAGCAACCAGAAAGCACAGAGGTAATGTCTCTGCCGGTAAAGGTCGTGTTGGTAAGCACAGAAAGCATCCCGGTGGTCGTGGTAAGGCCGGTGGTCAACACCACCACAGAACCAACATGGACAAGTACCATCCAGGTTACTTCGGAAAGGTTGGTATGAGACACTTCCGTTTACAACAAGCTCGTTACTGGCGCCCAGTAATTAACATCCAGAACTTGTGGTCTTTGATTCCTGAAGAGAAGAGAGAAGATGCTTTGAAGAACTCTTCTGCTTCTTCTGCCGTCGTTATTGACACTTTGGCCAATGGTTATGGTAAGGTCCTTGGTAAGGGTTCTTTGCCAAACATCCCAATTATCGTCAAGGCTAGATTTGTTTCCAAGGAG…	OK	450	YES	CAA	Glutamine	Glutamine (CAA)
yHMPu5000034941_komagataella_phaffii_160519_g004686.m1	ATGCCTACCAGATTCTCAGCAACCAGAAAGCACAGAGGTAATGTCTCTGCCGGTAAAGGTCGTGTTGGTAAGCACAGAAAGCATCCCGGTGGTCGTGGTAAGGCCGGTGGTCAACACCACCACAGAACCAACATGGACAAGTACCATCCAGGTTACTTCGGAAAGGTTGGTATGAGACACTTCCGTTTACAACAAGCTCGTTACTGGCGCCCAGTAATTAACATCCAGAACTTGTGGTCTTTGATTCCTGAAGAGAAGAGAGAAGATGCTTTGAAGAACTCTTCTGCTTCTTCTGCCGTCGTTATTGACACTTTGGCCAATGGTTATGGTAAGGTCCTTGGTAAGGGTTCTTTGCCAAACATCCCAATTATCGTCAAGGCTAGATTTGTTTCCAAGGAG…	ATGCCTACCAGATTCTCAGCAACCAGAAAGCACAGAGGTAATGTCTCTGCCGGTAAAGGTCGTGTTGGTAAGCACAGAAAGCATCCCGGTGGTCGTGGTAAGGCCGGTGGTCAACACCACCACAGAACCAACATGGACAAGTACCATCCAGGTTACTTCGGAAAGGTTGGTATGAGACACTTCCGTTTACAACAAGCTCGTTACTGGCGCCCAGTAATTAACATCCAGAACTTGTGGTCTTTGATTCCTGAAGAGAAGAGAGAAGATGCTTTGAAGAACTCTTCTGCTTCTTCTGCCGTCGTTATTGACACTTTGGCCAATGGTTATGGTAAGGTCCTTGGTAAGGGTTCTTTGCCAAACATCCCAATTATCGTCAAGGCTAGATTTGTTTCCAAGGAG…	OK	450	YES	CAA	Glutamine	Glutamine (CAA)
saprochaete_fungicola_g001187.m1	ATGCCTACCAGATTCTCAAAGACCAGAAAGCACAGAGGACACGTTTCCGCCGGTTACGGTCGTATCGGTAAGCACCGCAAGCATCCCGGTGGACGTGGTATGGCCGGTGGTCAGCACCATCACCGTACTAACCTTGATAAGTACCACCCTGGTTACTTTGGTAAGGTCGGTATGAGATACTTCCACAAGCAGCAGAACCACTTCTGGAGACCCGTCATTAACGTTGAGCGTCTATGGACTCTTATTCCTGAGGACAAGCGTGACCAGTACCTTAAGGAGGCTTCTCCTTCTGCTGCCCCTGTCATTGACACCCTCGCTGCTGGCTACGGTAAGGTCCTCGGTAAGGGTGACCTCCCCAAGATTCCCGTCATCGTCAAGGCTAGATTCGTCTCTGCTGAT…	ATGCCTACCAGATTCTCAAAGACCAGAAAGCACAGAGGACACGTTTCCGCCGGTTACGGTCGTATCGGTAAGCACCGCAAGCATCCCGGTGGACGTGGTATGGCCGGTGGTCAGCACCATCACCGTACTAACCTTGATAAGTACCACCCTGGTTACTTTGGTAAGGTCGGTATGAGATACTTCCACAAGCAGCAGAACCACTTCTGGAGACCCGTCATTAACGTTGAGCGTCTATGGACTCTTATTCCTGAGGACAAGCGTGACCAGTACCTTAAGGAGGCTTCTCCTTCTGCTGCCCCTGTCATTGACACCCTCGCTGCTGGCTACGGTAAGGTCCTCGGTAAGGGTGACCTCCCCAAGATTCCCGTCATCGTCAAGGCTAGATTCGTCTCTGCTGAT…	OK	450	YES	CAG	Glutamine	Glutamine (CAG)
yHMPu5000037244_Allodekkera_sacchari_SPADES.g003364.m1	ATGCCTACCAGATTCCGTCAAACCAGAAAGCACAGAGGTAACGTCACAGCCGGTTACGGTCGTATCGGTAAACATAGAAAGCACCCAGGTGGACGTGGTATGGCCGGTGGTTTAACCCATCACAGAATTGCCATGGATAAGTACCATCCAGGTTACTTCGGTAAAGTTGGTATGAGATACTTCCACAAGCAAACCAACCCATTCTGGAAGCCAGTTATAAACTTAGAAAAGTTGTGGTCTTTGGTTGAGGACAAGGACGAGAAGTTGGCCTCCTCTTCAAAGGAAAATGCTGTCGTTATAGATACTTTGGCCAGTGGTTACGCCAAGGTTTTGGGTAAAGGTAGACTTCCTAACGTTCCTGTGATCGTTAAGGCTAGATATGTTTCCAAATTGGCTGAA…	ATGCCTACCAGATTCCGTCAAACCAGAAAGCACAGAGGTAACGTCACAGCCGGTTACGGTCGTATCGGTAAACATAGAAAGCACCCAGGTGGACGTGGTATGGCCGGTGGTTTAACCCATCACAGAATTGCCATGGATAAGTACCATCCAGGTTACTTCGGTAAAGTTGGTATGAGATACTTCCACAAGCAAACCAACCCATTCTGGAAGCCAGTTATAAACTTAGAAAAGTTGTGGTCTTTGGTTGAGGACAAGGACGAGAAGTTGGCCTCCTCTTCAAAGGAAAATGCTGTCGTTATAGATACTTTGGCCAGTGGTTACGCCAAGGTTTTGGGTAAAGGTAGACTTCCTAACGTTCCTGTGATCGTTAAGGCTAGATATGTTTCCAAATTGGCTGAA…	OK	444	YES	TTA	Leucine2	Leucine2 (TTA)
metschnikowia_arizonensis_g000149.m1	ATGCCTACCAGATTCAGTAAGACCAGAAAGCATAGAGGACACGTTTCCGCCGGTAAGGGTAGAATTGGTAAGCACAGAAAGTCTCCCGGTGGACGTGGTATGGCTGGTGGTCAACACCACCACAGAACCAACTTGGACAAATACCACCCAGGTTACTTCGGTAAGGTCGGTATGAGATATTTCCACAAGCAAAAGAATCACTTCTGGCAACCAACTGTTAACGTTGACACCTTGTGGTCTTTGGTTGAAGAGGAAAAGAGAGAGCAATACCTCAAGTCCGCCTCTGCTTCCGCTGCCCCAGTTATCGATGTCTTAGCTCACGGTTTTGCTAAGGTCTTGGGTAAGGGTCAATTGCCACAAGTTCCAATCATCGTTAAGGCCAGATACGTCTCCAAGGAG…	ATGCCTACCAGATTCAGTAAGACCAGAAAGCATAGAGGACACGTTTCCGCCGGTAAGGGTAGAATTGGTAAGCACAGAAAGTCTCCCGGTGGACGTGGTATGGCTGGTGGTCAACACCACCACAGAACCAACTTGGACAAATACCACCCAGGTTACTTCGGTAAGGTCGGTATGAGATATTTCCACAAGCAAAAGAATCACTTCTGGCAACCAACTGTTAACGTTGACACCTTGTGGTCTTTGGTTGAAGAGGAAAAGAGAGAGCAATACCTCAAGTCCGCCTCTGCTTCCGCTGCCCCAGTTATCGATGTCTTAGCTCACGGTTTTGCTAAGGTCTTGGGTAAGGGTCAATTGCCACAAGTTCCAATCATCGTTAAGGCCAGATACGTCTCCAAGGAG…	OK	450	YES	CAA	Glutamine	Glutamine (CAA)
yHMPu5000035636_candida_alimentaria_201018.g002975.m1	ATGCCTACCAGATTCAGCAAGACCCGAAAGCACAGAGGCCACGTTTCCGCCGGTTACGGTCGAATCGGTAAGCACCGAAAGTCTCCCGGTGGTCGAGGTATGGCCGGTGGTCAGCATCATCACCGAACTAACATGGATAAGTACCATCCCGGTTACTTCGGTAAGGTCGGTATGCGAACTTTCCACAAGCAGCCCAACCACTCCTGGAAGCCCGTTCTCAACGTCGAGAACCTCTGGGCTCTCGTTGCTGAGGAGAACCGAGACAAGTACCTGTCCGGTGCCTCCGAGTCCGCTGCCCCCGTTATCGACACTCTCGCTTTCGGCTACGGCAAGGTCCTCGGTAAGGGCAAGCTCCCCAACGCCCCCATCATCGTCAAGGCCCGATTCGTCTCTGAGATT…	ATGCCTACCAGATTCAGCAAGACCCGAAAGCACAGAGGCCACGTTTCCGCCGGTTACGGTCGAATCGGTAAGCACCGAAAGTCTCCCGGTGGTCGAGGTATGGCCGGTGGTCAGCATCATCACCGAACTAACATGGATAAGTACCATCCCGGTTACTTCGGTAAGGTCGGTATGCGAACTTTCCACAAGCAGCCCAACCACTCCTGGAAGCCCGTTCTCAACGTCGAGAACCTCTGGGCTCTCGTTGCTGAGGAGAACCGAGACAAGTACCTGTCCGGTGCCTCCGAGTCCGCTGCCCCCGTTATCGACACTCTCGCTTTCGGCTACGGCAAGGTCCTCGGTAAGGGCAAGCTCCCCAACGCCCCCATCATCGTCAAGGCCCGATTCGTCTCTGAGATT…	OK	450	YES	CAG	Glutamine	Glutamine (CAG)
yHMPu5000035647_yarrowia_lipolytica_160519.haplomerger2.g002156.m1	ATGCCTACCAGATTCAGCAAGACCCGAAAGCACAGAGGCCACGTTTCCGCCGGTTACGGTCGAATCGGTAAGCACCGAAAGTCCCCTGGTGGACGAGGTATGGCTGGTGGTCAGCACCACCACCGAACTAACATGGATAAGTACCATCCTGGTTACTTCGGTAAGGTCGGTATGCGATACTTCCACAAGCAGCCTAACCACTTCTGGAAGCCCGTCGTCAACGTCGAGAACCTGTGGGCCCTTGTTCCCGCTGAGAACCGAGACAAGTACCTCTCTTCTGCCTCCGAGTCCGCTGCCCCCGTCATCGACACTCTCGCTCACGGTTACGGCAAGGTCCTCGGTAAGGGTAAGCTCCCCAACGTCCCTGTCATCGTCAAGGCTCGATTCGTCTCCGAGATC…	ATGCCTACCAGATTCAGCAAGACCCGAAAGCACAGAGGCCACGTTTCCGCCGGTTACGGTCGAATCGGTAAGCACCGAAAGTCCCCTGGTGGACGAGGTATGGCTGGTGGTCAGCACCACCACCGAACTAACATGGATAAGTACCATCCTGGTTACTTCGGTAAGGTCGGTATGCGATACTTCCACAAGCAGCCTAACCACTTCTGGAAGCCCGTCGTCAACGTCGAGAACCTGTGGGCCCTTGTTCCCGCTGAGAACCGAGACAAGTACCTCTCTTCTGCCTCCGAGTCCGCTGCCCCCGTCATCGACACTCTCGCTCACGGTTACGGCAAGGTCCTCGGTAAGGGTAAGCTCCCCAACGTCCCTGTCATCGTCAAGGCTCGATTCGTCTCCGAGATC…	OK	450	YES	CAG	Glutamine	Glutamine (CAG)
yarrowia_lipolytica_g001526.m1	ATGCCTACCAGATTCAGCAAGACCCGAAAGCACAGAGGCCACGTTTCCGCCGGTTACGGTCGAATCGGTAAGCACCGAAAGTCCCCTGGTGGACGAGGTATGGCTGGTGGTCAGCACCACCACCGAACTAACATGGATAAGTACCATCCTGGTTACTTCGGTAAGGTCGGTATGCGATACTTCCACAAGCAGCCTAACCACTTCTGGAAGCCCGTCGTCAACGTCGAGAACCTGTGGGCCCTTGTTCCCGCTGAGAACCGAGACAAGTACCTCTCTTCTGCCTCCGAGTCCGCTGCCCCCGTCATCGACACTCTCGCTCACGGTTACGGCAAGGTCCTCGGTAAGGGTAAGCTCCCCAACGTCCCTGTCATCGTCAAGGCTCGATTCGTCTCCGAGATC…	ATGCCTACCAGATTCAGCAAGACCCGAAAGCACAGAGGCCACGTTTCCGCCGGTTACGGTCGAATCGGTAAGCACCGAAAGTCCCCTGGTGGACGAGGTATGGCTGGTGGTCAGCACCACCACCGAACTAACATGGATAAGTACCATCCTGGTTACTTCGGTAAGGTCGGTATGCGATACTTCCACAAGCAGCCTAACCACTTCTGGAAGCCCGTCGTCAACGTCGAGAACCTGTGGGCCCTTGTTCCCGCTGAGAACCGAGACAAGTACCTCTCTTCTGCCTCCGAGTCCGCTGCCCCCGTCATCGACACTCTCGCTCACGGTTACGGCAAGGTCCTCGGTAAGGGTAAGCTCCCCAACGTCCCTGTCATCGTCAAGGCTCGATTCGTCTCCGAGATC…	OK	450	YES	CAG	Glutamine	Glutamine (CAG)
yHMPu5000035649_yarrowia_yakushimensis_170307.g000711.m1	ATGCCTACCAGATTCAGCAAGACCCGAAAGCACAGAGGCCACGTTTCCGCCGGTTACGGTCGAATCGGTAAGCACCGAAAGTCCCCTGGTGGACGAGGTATGGCTGGTGGTCAGCACCACCACCGAACTAACATGGATAAGTACCATCCCGGTTACTTCGGTAAGGTCGGTATGCGATACTTCCACAAGCAGCCCAACCACTTCTGGAAGCCCGTCGTTAACGTCGAGAACCTGTGGTCTCTTGTCCCCGCTGAGAACCGAGACAAGTACCTCTCTTCCGCCTCCGAGTCTGCTGCCCCCGTCATCGACACTCTCGCTCACGGTTACGGCAAGGTCCTCGGTAAGGGTAAGCTCCCCAACGTCCCTGTCATCGTCAAGGCTCGATTCGTCTCCGAGATC…	ATGCCTACCAGATTCAGCAAGACCCGAAAGCACAGAGGCCACGTTTCCGCCGGTTACGGTCGAATCGGTAAGCACCGAAAGTCCCCTGGTGGACGAGGTATGGCTGGTGGTCAGCACCACCACCGAACTAACATGGATAAGTACCATCCCGGTTACTTCGGTAAGGTCGGTATGCGATACTTCCACAAGCAGCCCAACCACTTCTGGAAGCCCGTCGTTAACGTCGAGAACCTGTGGTCTCTTGTCCCCGCTGAGAACCGAGACAAGTACCTCTCTTCCGCCTCCGAGTCTGCTGCCCCCGTCATCGACACTCTCGCTCACGGTTACGGCAAGGTCCTCGGTAAGGGTAAGCTCCCCAACGTCCCTGTCATCGTCAAGGCTCGATTCGTCTCCGAGATC…	OK	450	YES	CAG	Glutamine	Glutamine (CAG)
yHMPu5000035648_yarrowia_porcina_170307.g004269.m1	ATGCCTACCAGATTCAGCAAGACCCGAAAGCACAGAGGCCACGTTTCCGCCGGTTACGGTCGAATCGGTAAGCACCGAAAGTCCCCTGGTGGACGAGGTATGGCTGGTGGTCAGCACCACCACCGAACTAACATGGATAAGTACCATCCCGGTTACTTCGGTAAGGTCGGTATGCGATACTTCCACAAGCAGCCCAACCACTTCTGGAAGCCCGTCGTCAACGTCGAGAACCTCTGGGCCCTTGTTCCCGCTGAGAACCGAGACAAGTACCTCTCTTCCGCCTCCGAGTCCGCTGCCCCCGTCATCGACACTCTCGCTCACGGTTACGGCAAGGTCCTCGGTAAGGGTAAGCTCCCCAACGTCCCCGTCATCGTCAAGGCTCGATTCGTCTCCGAGATC…	ATGCCTACCAGATTCAGCAAGACCCGAAAGCACAGAGGCCACGTTTCCGCCGGTTACGGTCGAATCGGTAAGCACCGAAAGTCCCCTGGTGGACGAGGTATGGCTGGTGGTCAGCACCACCACCGAACTAACATGGATAAGTACCATCCCGGTTACTTCGGTAAGGTCGGTATGCGATACTTCCACAAGCAGCCCAACCACTTCTGGAAGCCCGTCGTCAACGTCGAGAACCTCTGGGCCCTTGTTCCCGCTGAGAACCGAGACAAGTACCTCTCTTCCGCCTCCGAGTCCGCTGCCCCCGTCATCGACACTCTCGCTCACGGTTACGGCAAGGTCCTCGGTAAGGGTAAGCTCCCCAACGTCCCCGTCATCGTCAAGGCTCGATTCGTCTCCGAGATC…	OK	450	YES	CAG	Glutamine	Glutamine (CAG)
yHMPu5000035632_candida_hollandica_170307.g005356.m1	ATGCCTACCAGATTCAGCAAGACCCGAAAGCACAGAGGCCACGTTTCCGCCGGTTACGGTCGAATCGGTAAGCACCGAAAGTCCCCTGGTGGACGAGGTATGGCTGGTGGTCAGCACCACCACCGAACTAACATGGATAAGTACCATCCCGGTTACTTCGGTAAGGTCGGTATGCGATACTTCCACAAGCAGCCCAACCACTTCTGGAAGCCCGTCCTCAACGTCGAGAACCTCTGGGCTCTCGTCCCCGCTGAGAACCGAGACAAGTACCTGTCTTCCGCTTCTGAGTCCGCTGCCCCCGTCATCGACACTCTCGCTCACGGTTACGGCAAGGTCCTCGGTAAGGGTAAGCTCCCCAACGTCCCCGTCATCGTCAAGGCTCGATTCGTCTCTGAGATC…	ATGCCTACCAGATTCAGCAAGACCCGAAAGCACAGAGGCCACGTTTCCGCCGGTTACGGTCGAATCGGTAAGCACCGAAAGTCCCCTGGTGGACGAGGTATGGCTGGTGGTCAGCACCACCACCGAACTAACATGGATAAGTACCATCCCGGTTACTTCGGTAAGGTCGGTATGCGATACTTCCACAAGCAGCCCAACCACTTCTGGAAGCCCGTCCTCAACGTCGAGAACCTCTGGGCTCTCGTCCCCGCTGAGAACCGAGACAAGTACCTGTCTTCCGCTTCTGAGTCCGCTGCCCCCGTCATCGACACTCTCGCTCACGGTTACGGCAAGGTCCTCGGTAAGGGTAAGCTCCCCAACGTCCCCGTCATCGTCAAGGCTCGATTCGTCTCTGAGATC…	OK	450	YES	CAG	Glutamine	Glutamine (CAG)
yHMPu5000035644_yarrowia_deformans_180604.g004828.m1	ATGCCTACCAGATTCAGCAAGACCCGAAAGCACAGAGGCCACGTTTCCGCCGGTTACGGTCGAATCGGTAAGCACCGAAAGTCCCCTGGTGGACGAGGTATGGCTGGTGGACAGCACCATCACCGAACTAACATGGATAAGTACCATCCCGGTTACTTCGGTAAGGTCGGTATGCGATACTTCCACAAGCAGCCCAACCACTTCTGGAAGCCCGTCGTCAACGTCGAGAACCTGTGGGCCCTTGTTCCCGCTGAGAACCGAGACAAGTACCTTTCTTCCGCCTCCGAGTCTGCTGCTCCCGTCATCGACACCCTCGCTCACGGTTACGGCAAGGTCCTTGGTAAGGGTAAGCTCCCCAACGTCCCTGTCATCGTCAAGGCTCGATTCGTTTCCGAGATC…	ATGCCTACCAGATTCAGCAAGACCCGAAAGCACAGAGGCCACGTTTCCGCCGGTTACGGTCGAATCGGTAAGCACCGAAAGTCCCCTGGTGGACGAGGTATGGCTGGTGGACAGCACCATCACCGAACTAACATGGATAAGTACCATCCCGGTTACTTCGGTAAGGTCGGTATGCGATACTTCCACAAGCAGCCCAACCACTTCTGGAAGCCCGTCGTCAACGTCGAGAACCTGTGGGCCCTTGTTCCCGCTGAGAACCGAGACAAGTACCTTTCTTCCGCCTCCGAGTCTGCTGCTCCCGTCATCGACACCCTCGCTCACGGTTACGGCAAGGTCCTTGGTAAGGGTAAGCTCCCCAACGTCCCTGTCATCGTCAAGGCTCGATTCGTTTCCGAGATC…	OK	450	YES	CAG	Glutamine	Glutamine (CAG)
yHMPu5000035631_candida_oslonensis_190924.g005080.m1	ATGCCTACCAGATTCAGCAAGACCCGAAAGCACAGAGGCCACGTTTCCGCCGGTTACGGTCGAATCGGTAAGCACCGAAAGTCCCCTGGTGGACGAGGTATGGCTGGTGGACAGCACCACCACCGAACTAACATGGATAAGTACCATCCCGGTTACTTCGGTAAGGTCGGTATGCGATACTTCCACAAGCAGCCTAACCACTTCTGGAAGCCCGTCGTCAACGTCGAGAACCTGTGGGCCCTTGTTCCCGCTGAGAACCGAGACAAGTACCTCTCTTCCGCTTCTGAGTCCGCTGCCCCCGTCATCGACACCCTCGCTCACGGTTACGGCAAGGTCCTCGGTAAGGGCAAGCTCCCCAACGTCCCCGTCATCGTCAAGGCTCGATTCGTCTCCGAGATC…	ATGCCTACCAGATTCAGCAAGACCCGAAAGCACAGAGGCCACGTTTCCGCCGGTTACGGTCGAATCGGTAAGCACCGAAAGTCCCCTGGTGGACGAGGTATGGCTGGTGGACAGCACCACCACCGAACTAACATGGATAAGTACCATCCCGGTTACTTCGGTAAGGTCGGTATGCGATACTTCCACAAGCAGCCTAACCACTTCTGGAAGCCCGTCGTCAACGTCGAGAACCTGTGGGCCCTTGTTCCCGCTGAGAACCGAGACAAGTACCTCTCTTCCGCTTCTGAGTCCGCTGCCCCCGTCATCGACACCCTCGCTCACGGTTACGGCAAGGTCCTCGGTAAGGGCAAGCTCCCCAACGTCCCCGTCATCGTCAAGGCTCGATTCGTCTCCGAGATC…	OK	450	YES	CAG	Glutamine	Glutamine (CAG)
yHMPu5000035635_candida_galli_170307.g000090.m1	ATGCCTACCAGATTCAGCAAGACCCGAAAGCACAGAGGCCACGTTTCCGCCGGTTACGGTCGAATCGGTAAGCACCGAAAGTCCCCTGGTGGACGAGGTATGGCTGGTGGACAGCACCACCACCGAACTAACATGGATAAGTACCATCCCGGTTACTTCGGTAAGGTCGGTATGCGATACTTCCACAAGCAGCCCAACCACTTCTGGAAGCCCGTCGTCAACGTCGAGAACCTGTGGGCCCTTGTTCCCGCTGAGAACCGAGACAAGTACCTCTCTTCCGCTTCTGAGTCCGCTGCCCCCGTCATCGACACTCTCGCTCACGGTTACGGCAAGGTCCTCGGTAAGGGTAAGCTCCCCAACGTCCCTGTCATCGTCAAGGCTCGATTCGTCTCCGAGATC…	ATGCCTACCAGATTCAGCAAGACCCGAAAGCACAGAGGCCACGTTTCCGCCGGTTACGGTCGAATCGGTAAGCACCGAAAGTCCCCTGGTGGACGAGGTATGGCTGGTGGACAGCACCACCACCGAACTAACATGGATAAGTACCATCCCGGTTACTTCGGTAAGGTCGGTATGCGATACTTCCACAAGCAGCCCAACCACTTCTGGAAGCCCGTCGTCAACGTCGAGAACCTGTGGGCCCTTGTTCCCGCTGAGAACCGAGACAAGTACCTCTCTTCCGCTTCTGAGTCCGCTGCCCCCGTCATCGACACTCTCGCTCACGGTTACGGCAAGGTCCTCGGTAAGGGTAAGCTCCCCAACGTCCCTGTCATCGTCAAGGCTCGATTCGTCTCCGAGATC…	OK	450	YES	CAG	Glutamine	Glutamine (CAG)
yHMPu5000037212_Yarrowia_brassicae_SPADES.g004618.m1	ATGCCTACCAGATTCAGCAAGACCCGAAAGCACAGAGGCCACGTTTCCGCCGGTTACGGTCGAATCGGTAAGCACCGAAAGTCCCCTGGTGGACGAGGTATGGCTGGTGGACAGCACCACCACCGAACTAACATGGATAAGTACCATCCCGGTTACTTCGGTAAGGTCGGTATGCGATACTTCCACAAGCAGCCCAACCACTTCTGGAAGCCCGTCGTCAACGTCGAGAACCTGTGGGCCCTTGTTCCCGCTGAGAACCGAGACAAGTACCTCTCTTCCGCCTCCGAGTCTGCTGCTCCCGTCATCGACACCCTCGCTCACGGTTACGGCAAGGTCCTCGGTAAGGGCAAGCTCCCCAACGTCCCTGTCATCGTCAAGGCTCGATTCGTCTCCGAGATC…	ATGCCTACCAGATTCAGCAAGACCCGAAAGCACAGAGGCCACGTTTCCGCCGGTTACGGTCGAATCGGTAAGCACCGAAAGTCCCCTGGTGGACGAGGTATGGCTGGTGGACAGCACCACCACCGAACTAACATGGATAAGTACCATCCCGGTTACTTCGGTAAGGTCGGTATGCGATACTTCCACAAGCAGCCCAACCACTTCTGGAAGCCCGTCGTCAACGTCGAGAACCTGTGGGCCCTTGTTCCCGCTGAGAACCGAGACAAGTACCTCTCTTCCGCCTCCGAGTCTGCTGCTCCCGTCATCGACACCCTCGCTCACGGTTACGGCAAGGTCCTCGGTAAGGGCAAGCTCCCCAACGTCCCTGTCATCGTCAAGGCTCGATTCGTCTCCGAGATC…	OK	450	YES	CAG	Glutamine	Glutamine (CAG)
yHMPu5000035630_candida_phangngaensis_170307.g001706.m1	ATGCCTACCAGATTCAGCAAGACCCGAAAGCACAGAGGCCACGTTTCCGCCGGTTACGGTCGAATCGGAAAGCACCGAAAGTCTCCTGGTGGTCGAGGTATGGCCGGTGGTCAGCACCACCACCGAACTAACATGGATAAGTACCATCCCGGTTACTTCGGTAAGGTCGGTATGCGATACTTCCACAAGCAGCCCAACCACTTCTGGCGACCCGTTGTCAACGTCGAGAACCTCTGGTCTCTCGTCCCCGCTGAGAACCGAGACAAGTACCTCGCCTCTGCCTCCGAGTCCGCTGCCCCCGTCATTGACACTCTTGCTCATGGCTACGGTAAGGTCCTCGGAAAGGGTAAGCTCCCCAACGTCCCCATCATCGTCAAGGCTCGATTCGTCTCTGAGATT…	ATGCCTACCAGATTCAGCAAGACCCGAAAGCACAGAGGCCACGTTTCCGCCGGTTACGGTCGAATCGGAAAGCACCGAAAGTCTCCTGGTGGTCGAGGTATGGCCGGTGGTCAGCACCACCACCGAACTAACATGGATAAGTACCATCCCGGTTACTTCGGTAAGGTCGGTATGCGATACTTCCACAAGCAGCCCAACCACTTCTGGCGACCCGTTGTCAACGTCGAGAACCTCTGGTCTCTCGTCCCCGCTGAGAACCGAGACAAGTACCTCGCCTCTGCCTCCGAGTCCGCTGCCCCCGTCATTGACACTCTTGCTCATGGCTACGGTAAGGTCCTCGGAAAGGGTAAGCTCCCCAACGTCCCCATCATCGTCAAGGCTCGATTCGTCTCTGAGATT…	OK	450	YES	CAG	Glutamine	Glutamine (CAG)
yHMPu5000035643_yarrowia_bubula_180604.g000318.m1	ATGCCTACCAGATTCAGCAAGACCCGAAAGCACAGAGGCCACGTTTCCGCCGGTTACGGTCGAATCGGAAAGCACCGAAAGTCCCCTGGTGGACGAGGTATGGCTGGTGGTCAGCACCATCACCGAACTAACATGGATAAGTACCATCCCGGTTACTTCGGAAAGGTCGGTATGCGATACTTCCACAAGCAGCCCAACCACTTCTGGAAGCCCGTCCTCAACGTTGAGAACCTGTGGGCTCTGGTCCCCGCTGAGAACCGAGACAAGTACCTTGCCTCTGCTTCTGAGTCCGCTGCCCCCGTCATCGACACCCTCGCTCACGGTTACGGCAAGGTCCTCGGAAAGGGCAAGCTCCCCAACGTCCCCGTCATTGTCAAGGCCCGATTCGTCTCCGAGATC…	ATGCCTACCAGATTCAGCAAGACCCGAAAGCACAGAGGCCACGTTTCCGCCGGTTACGGTCGAATCGGAAAGCACCGAAAGTCCCCTGGTGGACGAGGTATGGCTGGTGGTCAGCACCATCACCGAACTAACATGGATAAGTACCATCCCGGTTACTTCGGAAAGGTCGGTATGCGATACTTCCACAAGCAGCCCAACCACTTCTGGAAGCCCGTCCTCAACGTTGAGAACCTGTGGGCTCTGGTCCCCGCTGAGAACCGAGACAAGTACCTTGCCTCTGCTTCTGAGTCCGCTGCCCCCGTCATCGACACCCTCGCTCACGGTTACGGCAAGGTCCTCGGAAAGGGCAAGCTCCCCAACGTCCCCGTCATTGTCAAGGCCCGATTCGTCTCCGAGATC…	OK	450	YES	CAG	Glutamine	Glutamine (CAG)
yHMPu5000035646_yarrowia_keelungensis_170307.g001743.m1	ATGCCTACCAGATTCAGCAAGACCCGAAAGCACAGAGGCCACGTTTCCGCCGGTTACGGTCGAATCGGAAAGCACCGAAAGTCCCCTGGTGGACGAGGTATGGCTGGTGGTCAGCACCACCACCGAACTAACATGGATAAGTACCATCCCGGTTACTTCGGTAAGGTCGGTATGCGATACTTCCACAAGCAGCCCAACCACTTCTGGAAGCCCGTCGTCAACGTCGAGAACCTGTGGGCCCTTGTTCCCGCTGAGAACCGAGACAAGTACCTGTCTTCCGCTTCTGAGTCCGCTGCCCCCGTCATCGACACCCTCGCTCACGGTTACGGCAAGGTCCTCGGTAAGGGCAAGCTCCCCAACGTCCCCGTCATTGTCAAGGCCCGATTCGTCTCTGAGATT…	ATGCCTACCAGATTCAGCAAGACCCGAAAGCACAGAGGCCACGTTTCCGCCGGTTACGGTCGAATCGGAAAGCACCGAAAGTCCCCTGGTGGACGAGGTATGGCTGGTGGTCAGCACCACCACCGAACTAACATGGATAAGTACCATCCCGGTTACTTCGGTAAGGTCGGTATGCGATACTTCCACAAGCAGCCCAACCACTTCTGGAAGCCCGTCGTCAACGTCGAGAACCTGTGGGCCCTTGTTCCCGCTGAGAACCGAGACAAGTACCTGTCTTCCGCTTCTGAGTCCGCTGCCCCCGTCATCGACACCCTCGCTCACGGTTACGGCAAGGTCCTCGGTAAGGGCAAGCTCCCCAACGTCCCCGTCATTGTCAAGGCCCGATTCGTCTCTGAGATT…	OK	450	YES	CAG	Glutamine	Glutamine (CAG)
yHMPu5000034863_zygosaccharomyces_rouxii_180604.g003357.m1	ATGCCTACCAGATTCACTCAGACTAGAAAGCACAGAGGTCACATCTCAGCCGGTCACGGTCGTGTCGGTAAGCACAGAAAGCACCCTGGTGGTAAGGGTATGGCTGGTGGTCAACACCACCACAGAACCAACTTGGATAAGTACCATCCAGGTTACTTCGGTAAAGTTGGTATGAGATACTTCCGTAAGCAACCAAACCACTTCTGGAAGCCAGTTCTAAACTTGGACAAGTTGTGGACTTTGTTGTCTGACGAAAAGAGAGAACACTACTTGAAGGCTTCCTCTAAGTCTGCTGCTCCAGTTATTGACACTTTGGCTGCTGGTTACGGTAAGGTCTTGGGTAAAGGTAGAATCCCACAAGTTCCAGTGATCGTCAAGGCTAGATTTGTTTCCAAATTG…	ATGCCTACCAGATTCACTCAGACTAGAAAGCACAGAGGTCACATCTCAGCCGGTCACGGTCGTGTCGGTAAGCACAGAAAGCACCCTGGTGGTAAGGGTATGGCTGGTGGTCAACACCACCACAGAACCAACTTGGATAAGTACCATCCAGGTTACTTCGGTAAAGTTGGTATGAGATACTTCCGTAAGCAACCAAACCACTTCTGGAAGCCAGTTCTAAACTTGGACAAGTTGTGGACTTTGTTGTCTGACGAAAAGAGAGAACACTACTTGAAGGCTTCCTCTAAGTCTGCTGCTCCAGTTATTGACACTTTGGCTGCTGGTTACGGTAAGGTCTTGGGTAAAGGTAGAATCCCACAAGTTCCAGTGATCGTCAAGGCTAGATTTGTTTCCAAATTG…	OK	450	YES	CAA	Glutamine	Glutamine (CAA)
yHDO603_zygosaccharomyces_sapae_190924.haplomerger2_g002294.m1	ATGCCTACCAGATTCACTCAGACTAGAAAGCACAGAGGTCACATCTCAGCCGGTCACGGTCGTGTCGGTAAGCACAGAAAGCACCCTGGTGGTAAGGGTATGGCTGGTGGTCAACACCACCACAGAACCAACTTGGATAAGTACCATCCAGGTTACTTCGGTAAAGTTGGTATGAGATACTTCCGTAAGCAACCAAACCACTTCTGGAAGCCAGTTCTAAACTTGGACAAGTTGTGGACTTTGTTGTCTGACGAAAAGAGAGAACACTACTTGAAGGCTTCCTCTAAGTCTGCTGCTCCAGTTATTGACACTTTGGCTGCTGGTTACGGTAAGGTCTTGGGTAAAGGTAGAATCCCACAAGTTCCAGTGATCGTCAAGGCTAGATTTGTTTCCAAATTG…	ATGCCTACCAGATTCACTCAGACTAGAAAGCACAGAGGTCACATCTCAGCCGGTCACGGTCGTGTCGGTAAGCACAGAAAGCACCCTGGTGGTAAGGGTATGGCTGGTGGTCAACACCACCACAGAACCAACTTGGATAAGTACCATCCAGGTTACTTCGGTAAAGTTGGTATGAGATACTTCCGTAAGCAACCAAACCACTTCTGGAAGCCAGTTCTAAACTTGGACAAGTTGTGGACTTTGTTGTCTGACGAAAAGAGAGAACACTACTTGAAGGCTTCCTCTAAGTCTGCTGCTCCAGTTATTGACACTTTGGCTGCTGGTTACGGTAAGGTCTTGGGTAAAGGTAGAATCCCACAAGTTCCAGTGATCGTCAAGGCTAGATTTGTTTCCAAATTG…	OK	450	YES	CAA	Glutamine	Glutamine (CAA)
yHMPu5000037836_zygosaccharomyces_pseudorouxii_201018.haplomerger2.g000748.m1	ATGCCTACCAGATTCACTCAAACTAGAAAGCACAGAGGTCACATCTCAGCCGGTCACGGTCGTGTTGGTAAGCACAGAAAGCACCCTGGTGGTAAGGGTATGGCTGGTGGTCAACACCACCACAGAACCAACTTGGATAAGTACCACCCAGGTTACTTCGGTAAAGTTGGTATGAGATACTTCCGTAAGCAACCAAACCACTTCTGGAAGCCAGTTTTGAACTTGGACAAGTTGTGGACTTTGCTTTCTGAAGAAAAGAGAGAACACTTCTTGAAGTCTTCTTCTAAGTCTGCTGCTCCAGTTATTGACACCTTAGCTGCTGGTTACGGTAAGATCTTGGGTAAGGGTAGAATTCCACAAGTGCCAGTCATCGTCAAGGCTAGATTTGTTTCCAAATTG…	ATGCCTACCAGATTCACTCAAACTAGAAAGCACAGAGGTCACATCTCAGCCGGTCACGGTCGTGTTGGTAAGCACAGAAAGCACCCTGGTGGTAAGGGTATGGCTGGTGGTCAACACCACCACAGAACCAACTTGGATAAGTACCACCCAGGTTACTTCGGTAAAGTTGGTATGAGATACTTCCGTAAGCAACCAAACCACTTCTGGAAGCCAGTTTTGAACTTGGACAAGTTGTGGACTTTGCTTTCTGAAGAAAAGAGAGAACACTTCTTGAAGTCTTCTTCTAAGTCTGCTGCTCCAGTTATTGACACCTTAGCTGCTGGTTACGGTAAGATCTTGGGTAAGGGTAGAATTCCACAAGTGCCAGTCATCGTCAAGGCTAGATTTGTTTCCAAATTG…	OK	450	YES	CAA	Glutamine	Glutamine (CAA)
yHMPu5000035626_zygosaccharomyces_siamensis_190924.g003885.m1	ATGCCTACCAGATTCACTCAAACTAGAAAGCACAGAGGTCACATCTCAGCCGGTCACGGTCGTGTTGGTAAGCACAGAAAGCACCCAGGTGGTAAGGGTATGGCTGGTGGTCAACACCACCACAGAACCAACATGGATAAATACCACCCAGGTTACTTCGGTAAGCTCGGTATGAGATACTTCCGTAAGCAACCAAACCACTTCTGGAAGCCAGTTTTGAACTTGGACAAGTTGTGGACTTTGCTTTCTGAAGAAAAGAGAGAGCACTACTTGAAGTCTTCCTCTAAGTCTGCTGCCCCAGTTATTGACACCTTAGCTGCCGGTTACGGTAAGATCTTGGGTAAGGGTAGAATTCCACAAGTGCCAGTGATCGTCAAGGCTAGATTTGTTTCCAAGTTG…	ATGCCTACCAGATTCACTCAAACTAGAAAGCACAGAGGTCACATCTCAGCCGGTCACGGTCGTGTTGGTAAGCACAGAAAGCACCCAGGTGGTAAGGGTATGGCTGGTGGTCAACACCACCACAGAACCAACATGGATAAATACCACCCAGGTTACTTCGGTAAGCTCGGTATGAGATACTTCCGTAAGCAACCAAACCACTTCTGGAAGCCAGTTTTGAACTTGGACAAGTTGTGGACTTTGCTTTCTGAAGAAAAGAGAGAGCACTACTTGAAGTCTTCCTCTAAGTCTGCTGCCCCAGTTATTGACACCTTAGCTGCCGGTTACGGTAAGATCTTGGGTAAGGGTAGAATTCCACAAGTGCCAGTGATCGTCAAGGCTAGATTTGTTTCCAAGTTG…	OK	450	YES	CAA	Glutamine	Glutamine (CAA)
yHDO572_zygosaccharomyces_mellis_180604.g002532.m1	ATGCCTACCAGATTCACTCAAACTAGAAAGCACAGAGGTCACATCTCAGCCGGTCACGGTCGTGTTGGTAAGCACAGAAAGCACCCAGGTGGTAAGGGTATGGCTGGTGGTCAACACCACCACAGAACCAACATGGATAAATACCACCCAGGTTACTTCGGTAAACTTGGTATGAGATACTACCGTAAGCAGCCAAACCACTTCTGGAAGCCAGTTTTGAACTTGGACAAGTTGTGGACTTTGCTTTCCGAGGAAAAGAGAGAGCACTACTTGAAGTCTTCCTCCAAGTCTGCTGCCCCAGTTATTGACACCTTAGCTGCCGGTTACGGTAAGATCTTGGGTAAGGGTAGAATTCCACAAGTGCCAGTGATCGTCAAGGCTAGATTTGTTTCGAAGTTG…	ATGCCTACCAGATTCACTCAAACTAGAAAGCACAGAGGTCACATCTCAGCCGGTCACGGTCGTGTTGGTAAGCACAGAAAGCACCCAGGTGGTAAGGGTATGGCTGGTGGTCAACACCACCACAGAACCAACATGGATAAATACCACCCAGGTTACTTCGGTAAACTTGGTATGAGATACTACCGTAAGCAGCCAAACCACTTCTGGAAGCCAGTTTTGAACTTGGACAAGTTGTGGACTTTGCTTTCCGAGGAAAAGAGAGAGCACTACTTGAAGTCTTCCTCCAAGTCTGCTGCCCCAGTTATTGACACCTTAGCTGCCGGTTACGGTAAGATCTTGGGTAAGGGTAGAATTCCACAAGTGCCAGTGATCGTCAAGGCTAGATTTGTTTCGAAGTTG…	OK	450	YES	CAA	Glutamine	Glutamine (CAA)
yHMPu5000026279_Ambrosiozyma_monospora_SPADES.g003200.m1	ATGCCTACCAGATTCACTAAGACTAGAAAACACAGAGGTAACGTTTGTGCCGGTAAGGGTAGAGTTGGTAAGCACAGAAAGCACCCGGGTGGTAGAGGTATGGCCGGTGGTCAACATCACCACAGAATTAACATGGATAAGTACCATCCAGGTTACTTCGGTAAGGTTGGTATGAGATACTTCCACAAACAACAAAACCAATTCTGGAAGCCAGTTTTGAACTTAGACAAGTTGTGGTCACTCGTTGAAAACAAGGATGAGAAGTTGGCTGCCTCCACCAAGAACGCTGCTGTTGTTATTGACACTTTGGCTTTGGGTTACGGTAAGGTTTTGGGTAAGGGTAGACTTCCACAAGTTCCAGTTATCGTCAAGGCTAGATACGTTTCCAAGTTGGCTGAA…	ATGCCTACCAGATTCACTAAGACTAGAAAACACAGAGGTAACGTTTGTGCCGGTAAGGGTAGAGTTGGTAAGCACAGAAAGCACCCGGGTGGTAGAGGTATGGCCGGTGGTCAACATCACCACAGAATTAACATGGATAAGTACCATCCAGGTTACTTCGGTAAGGTTGGTATGAGATACTTCCACAAACAACAAAACCAATTCTGGAAGCCAGTTTTGAACTTAGACAAGTTGTGGTCACTCGTTGAAAACAAGGATGAGAAGTTGGCTGCCTCCACCAAGAACGCTGCTGTTGTTATTGACACTTTGGCTTTGGGTTACGGTAAGGTTTTGGGTAAGGGTAGACTTCCACAAGTTCCAGTTATCGTCAAGGCTAGATACGTTTCCAAGTTGGCTGAA…	OK	444	YES	CAA	Glutamine	Glutamine (CAA)
yHMPu5000026280_Ambrosiozyma_cicatricosa_S52_SPADES.g000059.m1	ATGCCTACCAGATTCACTAAGACTAGAAAACACAGAGGTAACGTTTGTGCCGGTAAGGGTAGAGTTGGTAAGCACAGAAAGCACCCGGGTGGTAGAGGTATGGCCGGTGGTCAACATCACCACAGAATTAACATGGATAAATACCATCCAGGTTACTTCGGTAAAGTTGGTATGAGATACTTCCACAAACAACAAAACCATTTCTGGAAGCCTGTTGTGAACTTAGACAAGTTGTGGTCTCTCGTTGAAAACAAGGATGAGAAGTTGGCTGCCTCCACCAAGAACGCTGCTGTTGTTATTGACACTTTGGCTTTGGGTTACGGTAAGGTTTTGGGTAAGGGTAGACTTCCACAAGTTCCAGTTATCGTTAAGGCTAGATACGTTTCCAAATTGGCTGAA…	ATGCCTACCAGATTCACTAAGACTAGAAAACACAGAGGTAACGTTTGTGCCGGTAAGGGTAGAGTTGGTAAGCACAGAAAGCACCCGGGTGGTAGAGGTATGGCCGGTGGTCAACATCACCACAGAATTAACATGGATAAATACCATCCAGGTTACTTCGGTAAAGTTGGTATGAGATACTTCCACAAACAACAAAACCATTTCTGGAAGCCTGTTGTGAACTTAGACAAGTTGTGGTCTCTCGTTGAAAACAAGGATGAGAAGTTGGCTGCCTCCACCAAGAACGCTGCTGTTGTTATTGACACTTTGGCTTTGGGTTACGGTAAGGTTTTGGGTAAGGGTAGACTTCCACAAGTTCCAGTTATCGTTAAGGCTAGATACGTTTCCAAATTGGCTGAA…	OK	444	YES	CAA	Glutamine	Glutamine (CAA)
yHMPu5000040953_metschnikowia_kipukae_201018_g000782.m1	ATGCCTACCAGATTCACTAAGACCAGAAAGCATAGAGGAAACGTTTCCGCCGGTAAGGGTAGAGTTGGTAAACACAGAAAGTCTCCCGGTGGACGTGGTATGGCTGGTGGTCAACACCACCACAGAACTAACTTGGACAAATATCACCCAGGTTACTTCGGTAAAGTTGGTATGAGATACTTCCACAAGCAACAAAACCACTTCTGGCAACCAGTTGTCAACGTTGACACCTTGTGGTCTTTGGTTGAGGAGGACAAGAGAGACCAATACCTCAAGTCTGCTTCTGCTTCTGCTGCCCCAGTTATTGACCTCTTGGCTCACGGTTACGCCAAGCTCTTGGGTAAGGGTTCTTTGCCAAACGTTCCAGTCATTGTTAAGGCCAGATTTGTTTCCAAGTTG…	ATGCCTACCAGATTCACTAAGACCAGAAAGCATAGAGGAAACGTTTCCGCCGGTAAGGGTAGAGTTGGTAAACACAGAAAGTCTCCCGGTGGACGTGGTATGGCTGGTGGTCAACACCACCACAGAACTAACTTGGACAAATATCACCCAGGTTACTTCGGTAAAGTTGGTATGAGATACTTCCACAAGCAACAAAACCACTTCTGGCAACCAGTTGTCAACGTTGACACCTTGTGGTCTTTGGTTGAGGAGGACAAGAGAGACCAATACCTCAAGTCTGCTTCTGCTTCTGCTGCCCCAGTTATTGACCTCTTGGCTCACGGTTACGCCAAGCTCTTGGGTAAGGGTTCTTTGCCAAACGTTCCAGTCATTGTTAAGGCCAGATTTGTTTCCAAGTTG…	OK	450	YES	CAA	Glutamine	Glutamine (CAA)
yHMPu5000037904_candida_nakhonratchasimensis_170912.g005026.m1	ATGCCTACCAGATTCACTAAGACCAGAAAGCACAGAGGTCACGTTTCCGCCGGTAAGGGTCGTGTTGGTAAGCACAGAAAGCACCCGGGTGGTAGAGGTATGGCCGGTGGTCAGCACCACCACAGAATTAACATGGATAAGTACCATCCAGGTTACTTCGGTAAGGTCGGTCAGAGATACTTCCACAAGCAGCAGTTGCACTTCTGGAGACCAACTTTGAACTTGGACAAGCTCTGGACTTTGGTTGCTGAGGACAAGAGAGAGCAGTACTTGGCCTCTTCCTCTGCTTCCGCTGCCCCAGTCATTGACACTTTGGCTGCCGGTTACGGTAAGGTCCTTGGTAAGGGTCGTCTTCCACAGGTTCCAGTCATCGTCAAGGCCAGATTTGTTTCCAAGTTG…	ATGCCTACCAGATTCACTAAGACCAGAAAGCACAGAGGTCACGTTTCCGCCGGTAAGGGTCGTGTTGGTAAGCACAGAAAGCACCCGGGTGGTAGAGGTATGGCCGGTGGTCAGCACCACCACAGAATTAACATGGATAAGTACCATCCAGGTTACTTCGGTAAGGTCGGTCAGAGATACTTCCACAAGCAGCAGTTGCACTTCTGGAGACCAACTTTGAACTTGGACAAGCTCTGGACTTTGGTTGCTGAGGACAAGAGAGAGCAGTACTTGGCCTCTTCCTCTGCTTCCGCTGCCCCAGTCATTGACACTTTGGCTGCCGGTTACGGTAAGGTCCTTGGTAAGGGTCGTCTTCCACAGGTTCCAGTCATCGTCAAGGCCAGATTTGTTTCCAAGTTG…	OK	450	YES	CAG	Glutamine	Glutamine (CAG)
yHMPu5000038084_candida_stauntonica_170912.g000648.m1	ATGCCTACCAGATTCACTAAGACCAGAAAGCACAGAGGTCACGTTTCCGCCGGTAAGGGTCGTATCGGTAAGCACAGAAAGCACCCGGGTGGTAGAGGTATGGCCGGTGGTCAGCACCACCACAGAACTAACTTGGATAAGTACCATCCAGGTTACTTCGGTAAGGTCGGTCAGAGATACTTCCACAAGCAGCAGTTGCACTTCTGGAGACCAACTTTGAACTTGGACAAGCTTTGGACTTTGGTTCCAGAGGAGAAGAGAGACCAGTACTTGGCCTCTGCTTCTGCTTCCGCTGCTCCAGTCATCGACACTTTGGCTGCCGGTTACGGTAAGGTCCTTGGTAAGGGTCGTTTGCCAGAGGTTCCAGTCATCGTCAAGGCTAGATTCGTCTCTAAGTTG…	ATGCCTACCAGATTCACTAAGACCAGAAAGCACAGAGGTCACGTTTCCGCCGGTAAGGGTCGTATCGGTAAGCACAGAAAGCACCCGGGTGGTAGAGGTATGGCCGGTGGTCAGCACCACCACAGAACTAACTTGGATAAGTACCATCCAGGTTACTTCGGTAAGGTCGGTCAGAGATACTTCCACAAGCAGCAGTTGCACTTCTGGAGACCAACTTTGAACTTGGACAAGCTTTGGACTTTGGTTCCAGAGGAGAAGAGAGACCAGTACTTGGCCTCTGCTTCTGCTTCCGCTGCTCCAGTCATCGACACTTTGGCTGCCGGTTACGGTAAGGTCCTTGGTAAGGGTCGTTTGCCAGAGGTTCCAGTCATCGTCAAGGCTAGATTCGTCTCTAAGTTG…	OK	450	YES	CAG	Glutamine	Glutamine (CAG)
yHMPu5000034620_pichia_sp_170307.g004619.m1	ATGCCTACCAGATTCACTAAGACAAGAAAGCACAGAGGTAACGTTTCCGCTGGTAACGGTAGAGTTGGTAAGCACAGAAAGCATCCGGGTGGTAGAGGTATGGCCGGTGGTCAACATCATCACAGAACCAATTTAGATAAGTTCCATCCAGGTTACTTTGGTAAGGTTGGTATGAGATACTTCCACAAGCAAAGAAACCACTTCTGGAAACCAATCATTAACTTAGACAAATTATGGTCATTAGTTGAAAACAAGGATGAAAAGATTGCTTCTTCAACCAAGGATGCTGCTATTGTTATTGATACTTTAGCTTCAGGTTACGGTAAGGTTTTAGGTAAGGGTAGACTTCCACAAGTTCCAGTTATTGTTAAGGCTAGATATGTTTCCAAGTTAGCTGAA…	ATGCCTACCAGATTCACTAAGACAAGAAAGCACAGAGGTAACGTTTCCGCTGGTAACGGTAGAGTTGGTAAGCACAGAAAGCATCCGGGTGGTAGAGGTATGGCCGGTGGTCAACATCATCACAGAACCAATTTAGATAAGTTCCATCCAGGTTACTTTGGTAAGGTTGGTATGAGATACTTCCACAAGCAAAGAAACCACTTCTGGAAACCAATCATTAACTTAGACAAATTATGGTCATTAGTTGAAAACAAGGATGAAAAGATTGCTTCTTCAACCAAGGATGCTGCTATTGTTATTGATACTTTAGCTTCAGGTTACGGTAAGGTTTTAGGTAAGGGTAGACTTCCACAAGTTCCAGTTATTGTTAAGGCTAGATATGTTTCCAAGTTAGCTGAA…	OK	444	YES	CAA	Glutamine	Glutamine (CAA)
yHMPu5000035309_pichia_scutulata_180604.haplomerger2.g005004.m1	ATGCCTACCAGATTCACTAAGACAAGAAAGCACAGAGGTAACGTTTCCGCTGGTAACGGTAGAGTTGGTAAGCACAGAAAGCATCCGGGTGGTAGAGGTATGGCCGGTGGTCAACATCATCACAGAACCAATTTAGATAAGTACCATCCAGGTTACTTTGGTAAGGTTGGTATGAGATACTTCCACAAGCAAAGAAACCACTTCTGGAAACCAATCATCAACTTAGACAAATTATGGTCATTAGTTGAAAACAAGGATGAAAAGATTGCTTCTTCAACCAAGGATGCTGCTATTGTTATTGATACTTTAGCTTCAGGTTACGGTAAGGTTTTAGGTAAGGGTAAACTTCCACAAGTTCCAGTTATTGTTAAGGCTAGATACGTTTCCAAGTTAGCTGAA…	ATGCCTACCAGATTCACTAAGACAAGAAAGCACAGAGGTAACGTTTCCGCTGGTAACGGTAGAGTTGGTAAGCACAGAAAGCATCCGGGTGGTAGAGGTATGGCCGGTGGTCAACATCATCACAGAACCAATTTAGATAAGTACCATCCAGGTTACTTTGGTAAGGTTGGTATGAGATACTTCCACAAGCAAAGAAACCACTTCTGGAAACCAATCATCAACTTAGACAAATTATGGTCATTAGTTGAAAACAAGGATGAAAAGATTGCTTCTTCAACCAAGGATGCTGCTATTGTTATTGATACTTTAGCTTCAGGTTACGGTAAGGTTTTAGGTAAGGGTAAACTTCCACAAGTTCCAGTTATTGTTAAGGCTAGATACGTTTCCAAGTTAGCTGAA…	OK	444	YES	CAA	Glutamine	Glutamine (CAA)
yHMPu5000034618_candida_rugopelliculosa_170307.g004418.m1	ATGCCTACCAGATTCACTAAGACAAGAAAGCACAGAGGTAACGTTTCCGCTGGTAACGGTAGAGTTGGTAAGCACAGAAAGCATCCGGGTGGTAGAGGTATGGCCGGTGGTCAACATCATCACAGAACCAATTTAGATAAGTACCATCCAGGTTACTTTGGTAAAGTTGGTATGAGATACTTCCACAAACAAAGAAACCACTTCTGGAAGCCAATCATCAACTTAGACAAATTATGGTCATTAGTTGAAAACAAGGATGAAAAGATTGCATCTTCAACCAAGGATGCTGCTATTGTTATTGATACTTTAGCTTCTGGTTATGGTAAGGTTTTAGGTAAGGGTAGACTTCCACAAGTTCCAGTTATCGTTAAGGCTAGATACGTTTCTAAGTTAGCTGAA…	ATGCCTACCAGATTCACTAAGACAAGAAAGCACAGAGGTAACGTTTCCGCTGGTAACGGTAGAGTTGGTAAGCACAGAAAGCATCCGGGTGGTAGAGGTATGGCCGGTGGTCAACATCATCACAGAACCAATTTAGATAAGTACCATCCAGGTTACTTTGGTAAAGTTGGTATGAGATACTTCCACAAACAAAGAAACCACTTCTGGAAGCCAATCATCAACTTAGACAAATTATGGTCATTAGTTGAAAACAAGGATGAAAAGATTGCATCTTCAACCAAGGATGCTGCTATTGTTATTGATACTTTAGCTTCTGGTTATGGTAAGGTTTTAGGTAAGGGTAGACTTCCACAAGTTCCAGTTATCGTTAAGGCTAGATACGTTTCTAAGTTAGCTGAA…	OK	444	YES	CAA	Glutamine	Glutamine (CAA)
yHMPu5000037198_Pichia_paraexigua_SPADES.g004598.m1	ATGCCTACCAGATTCACTAAGACAAGAAAGCACAGAGGTAACGTTTCCGCTGGTAACGGTAGAGTTGGTAAGCACAGAAAGCATCCGGGTGGTAGAGGTATGGCCGGTGGTCAACATCATCACAGAACCAACTTAGATAAGTTCCATCCAGGTTATTTCGGTAAGGTTGGTATGAGATACTTCCACAAGCAAAGAAACCACTTTTGGAAGCCAATCATCAACTTAGATAAATTATGGTCTTTAGTTGAAAACAAGGATGAAAAGATTGCTTCCTCAACCAAGGATGCTGCTATTGTTATTGATACTTTAGCATCAGGTTACGGTAAGGTTTTAGGTAAGGGTAGACTTCCACAAGTTCCAGTTATCGTTAAGGCTAGATACGTTTCTAAGTTAGCTGAA…	ATGCCTACCAGATTCACTAAGACAAGAAAGCACAGAGGTAACGTTTCCGCTGGTAACGGTAGAGTTGGTAAGCACAGAAAGCATCCGGGTGGTAGAGGTATGGCCGGTGGTCAACATCATCACAGAACCAACTTAGATAAGTTCCATCCAGGTTATTTCGGTAAGGTTGGTATGAGATACTTCCACAAGCAAAGAAACCACTTTTGGAAGCCAATCATCAACTTAGATAAATTATGGTCTTTAGTTGAAAACAAGGATGAAAAGATTGCTTCCTCAACCAAGGATGCTGCTATTGTTATTGATACTTTAGCATCAGGTTACGGTAAGGTTTTAGGTAAGGGTAGACTTCCACAAGTTCCAGTTATCGTTAAGGCTAGATACGTTTCTAAGTTAGCTGAA…	OK	444	YES	CAA	Glutamine	Glutamine (CAA)
yHMPu5000034629_pichia_exigua_180604.g005410.m1	ATGCCTACCAGATTCACTAAGACAAGAAAGCACAGAGGTAACGTTTCCGCTGGTAACGGTAGAGTTGGTAAGCACAGAAAGCATCCGGGTGGTAGAGGTATGGCCGGTGGTCAACATCATCACAGAACCAACTTAGATAAGTTCCATCCAGGTTACTTCGGTAAGGTTGGTATGAGATACTTCCACAAGCAAAGAAACCATTTCTGGAAGCCAATCATCAACTTAGACAAGTTATGGTCATTAGTTGAAAACAAGGATGAAAAAATTGCTTCTTCCACTAAGGATGCTGCTATTGTTATTGATACTTTAGCATCAGGTTACGGTAAGGTTTTAGGTAAGGGTAGACTTCCACAAGTTCCAGTCATCGTTAAGGCTAGATACGTTTCTAAGTTAGCTGAA…	ATGCCTACCAGATTCACTAAGACAAGAAAGCACAGAGGTAACGTTTCCGCTGGTAACGGTAGAGTTGGTAAGCACAGAAAGCATCCGGGTGGTAGAGGTATGGCCGGTGGTCAACATCATCACAGAACCAACTTAGATAAGTTCCATCCAGGTTACTTCGGTAAGGTTGGTATGAGATACTTCCACAAGCAAAGAAACCATTTCTGGAAGCCAATCATCAACTTAGACAAGTTATGGTCATTAGTTGAAAACAAGGATGAAAAAATTGCTTCTTCCACTAAGGATGCTGCTATTGTTATTGATACTTTAGCATCAGGTTACGGTAAGGTTTTAGGTAAGGGTAGACTTCCACAAGTTCCAGTCATCGTTAAGGCTAGATACGTTTCTAAGTTAGCTGAA…	OK	444	YES	CAA	Glutamine	Glutamine (CAA)
yHMPu5000038087_candida_phayaonensis_170912.g004732.m1	ATGCCTACCAGATTCACTAAGACAAGAAAGCACAGAGGTAACGTTTCCGCTGGTAACGGTAGAGTTGGTAAGCACAGAAAGCACCCGGGTGGTAGAGGTATGGCCGGTGGTCAACATCACCACAGAACCAACTTAGATAAGTACCATCCAGGTTACTTTGGTAAGGTTGGTATGAGATACTTCCACAAACAAAGAAACCATTTCTGGAAGCCAATCATCAACTTAGACAAATTATGGTCATTAGTTGAAAACAAGGATGAAAAGATTGCTTCTTCAACCAAGGATGCAGCTGTTGTTATTGACACTTTAGCTTCTGGTTACGGTAAGGTTTTAGGTAAGGGTAGACTTCCACAAGTTCCAGTCATTGTTAAGGCAAGATACGTTTCTAAGTTAGCTGAA…	ATGCCTACCAGATTCACTAAGACAAGAAAGCACAGAGGTAACGTTTCCGCTGGTAACGGTAGAGTTGGTAAGCACAGAAAGCACCCGGGTGGTAGAGGTATGGCCGGTGGTCAACATCACCACAGAACCAACTTAGATAAGTACCATCCAGGTTACTTTGGTAAGGTTGGTATGAGATACTTCCACAAACAAAGAAACCATTTCTGGAAGCCAATCATCAACTTAGACAAATTATGGTCATTAGTTGAAAACAAGGATGAAAAGATTGCTTCTTCAACCAAGGATGCAGCTGTTGTTATTGACACTTTAGCTTCTGGTTACGGTAAGGTTTTAGGTAAGGGTAGACTTCCACAAGTTCCAGTCATTGTTAAGGCAAGATACGTTTCTAAGTTAGCTGAA…	OK	444	YES	CAA	Glutamine	Glutamine (CAA)
yHMPu5000035661_pichia_membranifaciens_160519.g001680.m1	ATGCCTACCAGATTCACTAAAACTAGAAAGCACAGAGGTAACGTTTGCGCGGGTAAGGGTCGTGTTGGTAAGCACAGAAAGCATCCAGGTGGTAGAGGTATGGCCGGTGGTCAACACCACCACAGAACCAACTTAGACAAATACCACCCAGGTTATTTCGGTAAGGTTGGTATGAGATACTTCCACAAACAAAGAAACCACTTCTGGAAGCCAGTCATCAACTTAGACAAGTTATGGTCTTTAGTTGAAAACAAGGACGAAAAGGTCGCTTCCTCCACCAAGGACGCTGCTATTGTCATCGACACTTTGGCTTCCGGTTACGGTAAGGTCTTGGGTAAGGGTAGACTTCCACAAGTTCCTGTCATTGTCAAGGCTAGATACGTTTCCAAGTTGGCTGAA…	ATGCCTACCAGATTCACTAAAACTAGAAAGCACAGAGGTAACGTTTGCGCGGGTAAGGGTCGTGTTGGTAAGCACAGAAAGCATCCAGGTGGTAGAGGTATGGCCGGTGGTCAACACCACCACAGAACCAACTTAGACAAATACCACCCAGGTTATTTCGGTAAGGTTGGTATGAGATACTTCCACAAACAAAGAAACCACTTCTGGAAGCCAGTCATCAACTTAGACAAGTTATGGTCTTTAGTTGAAAACAAGGACGAAAAGGTCGCTTCCTCCACCAAGGACGCTGCTATTGTCATCGACACTTTGGCTTCCGGTTACGGTAAGGTCTTGGGTAAGGGTAGACTTCCACAAGTTCCTGTCATTGTCAAGGCTAGATACGTTTCCAAGTTGGCTGAA…	OK	444	YES	CAA	Glutamine	Glutamine (CAA)
yHMPu5000035260_candida_peoriensis_170713.g004794.m1	ATGCCTACCAGATTCACTAAAACTAGAAAGCACAGAGGTAACGTCTCAGCCGGTAAAGGTCGTGTTGGTAAACACAGAAAGCATCCAGGTGGTAGAGGTAGAGCTGGTGGTCAACATCATCACAGAACCAATTTAGATAAATACCATCCAGGTTACTTTGGTAAAGTTGGTCAAAGATACTTCCACAAACAACAATTACATTTCTGGAAACCAACTTTAAACTTGGACAAATTATGGACTTTAGTTCCAGAAGACAAAAAAGAACAATACTTGAACTCTTCTTCCTCATCTGCTGCTCCAGTCATTGACACCTTAGCTGCTGGTTACGGTAAAGTTTTAGGTAAAGGTAGATTACCAAATGTTCCAGTTATTGTCAAAGCCAGATTTGTTTCTGAATTA…	ATGCCTACCAGATTCACTAAAACTAGAAAGCACAGAGGTAACGTCTCAGCCGGTAAAGGTCGTGTTGGTAAACACAGAAAGCATCCAGGTGGTAGAGGTAGAGCTGGTGGTCAACATCATCACAGAACCAATTTAGATAAATACCATCCAGGTTACTTTGGTAAAGTTGGTCAAAGATACTTCCACAAACAACAATTACATTTCTGGAAACCAACTTTAAACTTGGACAAATTATGGACTTTAGTTCCAGAAGACAAAAAAGAACAATACTTGAACTCTTCTTCCTCATCTGCTGCTCCAGTCATTGACACCTTAGCTGCTGGTTACGGTAAAGTTTTAGGTAAAGGTAGATTACCAAATGTTCCAGTTATTGTCAAAGCCAGATTTGTTTCTGAATTA…	OK	450	YES	CAA	Glutamine	Glutamine (CAA)
yHMPu5000038386_candida_jianshihensis_170713.haplomerger2.g000783.m1	ATGCCTACCAGATTCACTAAAACTAGAAAACACAGAGGTCACGTCTCAGCCGGTAACGGTCGTGTTGGTAAACACAGAAAGCATCCGGGTGGTAGAGGTAAAGCTGGTGGTCAACATCATCACAGAACTAACTTAGATAAATACCATCCAGGTTACTTCGGTAAAGTTGGTCAAAGATACTTCCACAAACAACAATTACACTTCTGGAAACCAGTTTTGAACTTGGACAAATTATGGACTTTAGTTCCAGAAGACAAAAGAGACCAATACTTAGCTTCTGCCTCTGCTTCCGCTGCTCCAGTCATTGACACCTTAGCTGCTGGTTACGGTAAAGTTTTAGGTAAAGGTAGATTGCCAGAAGTTCCAGTTATCGTCAAAGCTAGATTCGTTTCTAAATTA…	ATGCCTACCAGATTCACTAAAACTAGAAAACACAGAGGTCACGTCTCAGCCGGTAACGGTCGTGTTGGTAAACACAGAAAGCATCCGGGTGGTAGAGGTAAAGCTGGTGGTCAACATCATCACAGAACTAACTTAGATAAATACCATCCAGGTTACTTCGGTAAAGTTGGTCAAAGATACTTCCACAAACAACAATTACACTTCTGGAAACCAGTTTTGAACTTGGACAAATTATGGACTTTAGTTCCAGAAGACAAAAGAGACCAATACTTAGCTTCTGCCTCTGCTTCCGCTGCTCCAGTCATTGACACCTTAGCTGCTGGTTACGGTAAAGTTTTAGGTAAAGGTAGATTGCCAGAAGTTCCAGTTATCGTCAAAGCTAGATTCGTTTCTAAATTA…	OK	450	YES	CAA	Glutamine	Glutamine (CAA)
yHMPu5000037888_candida_quercuum_170210.g002780.m1	ATGCCTACCAGATTCACTAAAACTAGAAAACACAGAGGTCACGTCTCAGCCGGTAACGGTCGTGTTGGTAAACACAGAAAGCATCCAGGTGGTAGAGGTAAAGCTGGTGGTCAACATCATCACAGAACCAATTTAGATAAATACCATCCAGGTTACTTCGGTAAAGTCGGTCAAAGATACTTCCACAAACAACAATTACATTTCTGGAAACCAATCTTAAACTTGGACAAATTATGGACTTTAGTTCCAGAAGACAAAAGAGATTCATACTTAGCCTCTTCTTCTGCTTCTGCTGCTCCAGTTATTGACACCTTAGCTGCTGGTTACGGTAAAGTTTTAGGTAAAGGTCAATTACCAAAAGTTCCAGTCATTGTCAAAGCTAGATTTGTTTCTAAATTA…	ATGCCTACCAGATTCACTAAAACTAGAAAACACAGAGGTCACGTCTCAGCCGGTAACGGTCGTGTTGGTAAACACAGAAAGCATCCAGGTGGTAGAGGTAAAGCTGGTGGTCAACATCATCACAGAACCAATTTAGATAAATACCATCCAGGTTACTTCGGTAAAGTCGGTCAAAGATACTTCCACAAACAACAATTACATTTCTGGAAACCAATCTTAAACTTGGACAAATTATGGACTTTAGTTCCAGAAGACAAAAGAGATTCATACTTAGCCTCTTCTTCTGCTTCTGCTGCTCCAGTTATTGACACCTTAGCTGCTGGTTACGGTAAAGTTTTAGGTAAAGGTCAATTACCAAAAGTTCCAGTCATTGTCAAAGCTAGATTTGTTTCTAAATTA…	OK	450	YES	CAA	Glutamine	Glutamine (CAA)
yHMPu5000038118_candida_cabralensis_170912.haplomerger2.g004362.m1	ATGCCTACCAGATTCACTAAAACTAGAAAACACAGAGGTAACGTTTGTGCGGGTAAAGGTCGTGTTGGTAAACACAGAAAGCATCCAGGTGGTAGAGGTATGGCCGGTGGTCAACATCACCACAGAACCAATTTAGATAAATACCATCCAGGTTATTTTGGTAAAGTTGGTATGAGATATTTCCACAAACAAAGAAACCACTTCTGGAAACCAGTTATCAATCTTGATAAATTATGGTCCTTAGTTGAAGACAAAGATGAAAAAATTGCATCATCTACTAAAGATGCAGCTATTGTTATTGATACTTTAGCTTCAGGTTACGGTAAAGTCTTAGGTAAAGGTAGACTTCCTCAAGTTCCAGTTATCGTCAAAGCTAGATACGTTTCTAAATTAGCTGAA…	ATGCCTACCAGATTCACTAAAACTAGAAAACACAGAGGTAACGTTTGTGCGGGTAAAGGTCGTGTTGGTAAACACAGAAAGCATCCAGGTGGTAGAGGTATGGCCGGTGGTCAACATCACCACAGAACCAATTTAGATAAATACCATCCAGGTTATTTTGGTAAAGTTGGTATGAGATATTTCCACAAACAAAGAAACCACTTCTGGAAACCAGTTATCAATCTTGATAAATTATGGTCCTTAGTTGAAGACAAAGATGAAAAAATTGCATCATCTACTAAAGATGCAGCTATTGTTATTGATACTTTAGCTTCAGGTTACGGTAAAGTCTTAGGTAAAGGTAGACTTCCTCAAGTTCCAGTTATCGTCAAAGCTAGATACGTTTCTAAATTAGCTGAA…	OK	444	YES	CAA	Glutamine	Glutamine (CAA)
yHMPu5000038075_candida_ulmi_170912.g001865.m1	ATGCCTACCAGATTCACTAAAACCAGAAAACATAGAGGTCACGTCTCAGCCGGTAACGGTCGTGTTGGTAAACACAGAAAGCATCCGGGTGGTAGAGGTAAAGCCGGTGGTCAACACCACCACAGAACCAATTTAGATAAATACCATCCAGGTTACTTCGGTAAAGTTGGTCAAAGATACTTCCACAAACAACAATTACATTTCTGGAGACCAGTCTTAAACTTAGACAAATTATGGACTTTAGTTCCAGAAGAAAAAAGAGATCAATACTTAGCTTCTGCTTCTCCATCTTCTGCTCCAGTCATTGACACCTTAGCTGCTGGTTACGGTAAAGTTCTAGCCAAAGGTAAATTACCAAACGTTCCAGTTATCGTCAAAGCTAGATTTGTTTCCAAATTA…	ATGCCTACCAGATTCACTAAAACCAGAAAACATAGAGGTCACGTCTCAGCCGGTAACGGTCGTGTTGGTAAACACAGAAAGCATCCGGGTGGTAGAGGTAAAGCCGGTGGTCAACACCACCACAGAACCAATTTAGATAAATACCATCCAGGTTACTTCGGTAAAGTTGGTCAAAGATACTTCCACAAACAACAATTACATTTCTGGAGACCAGTCTTAAACTTAGACAAATTATGGACTTTAGTTCCAGAAGAAAAAAGAGATCAATACTTAGCTTCTGCTTCTCCATCTTCTGCTCCAGTCATTGACACCTTAGCTGCTGGTTACGGTAAAGTTCTAGCCAAAGGTAAATTACCAAACGTTCCAGTTATCGTCAAAGCTAGATTTGTTTCCAAATTA…	OK	450	YES	CAA	Glutamine	Glutamine (CAA)
yHMPu5000035265_Candida_sp_SPADES.g007052.m1	ATGCCTACCAGATTCACTAAAACCAGAAAACATAGAGGTCACGTCTCAGCCGGTAACGGTCGTATTGGTAAACACAGAAAACATCCGGGTGGTAGAGGTAAAGCTGGTGGTCAACATCATCACAGAACCAATTTAGATAAATACCATCCAGGTTACTTCGGTAAAGTTGGTCAAAGATACTTCCACAAACAACAATTACATTTCTGGAAACCAGTCTTAAACTTAGACAAATTATGGACTTTAGTTCCAGAAGAAAAAAGAGACTCATACTTAGCTTCTGCTTCTGCTTCTGCTGCTCCAGTCATTGATACCTTAGCTGCTGGTTACGGTAAAGTCTTAGGTAAAGGTAGATTACCAAACGTCCCAGTTATCGTCAAAGCTAGATTCGTTTCTAAATTA…	ATGCCTACCAGATTCACTAAAACCAGAAAACATAGAGGTCACGTCTCAGCCGGTAACGGTCGTATTGGTAAACACAGAAAACATCCGGGTGGTAGAGGTAAAGCTGGTGGTCAACATCATCACAGAACCAATTTAGATAAATACCATCCAGGTTACTTCGGTAAAGTTGGTCAAAGATACTTCCACAAACAACAATTACATTTCTGGAAACCAGTCTTAAACTTAGACAAATTATGGACTTTAGTTCCAGAAGAAAAAAGAGACTCATACTTAGCTTCTGCTTCTGCTTCTGCTGCTCCAGTCATTGATACCTTAGCTGCTGGTTACGGTAAAGTCTTAGGTAAAGGTAGATTACCAAACGTCCCAGTTATCGTCAAAGCTAGATTCGTTTCTAAATTA…	OK	450	YES	CAA	Glutamine	Glutamine (CAA)
yHMPu5000035259_wickerhamomyces_sydowiorum_170307.haplomerger2.g001665.m1	ATGCCTACCAGATTCACTAAAACAAGAAAACACAGAGGTAACGTCTCAGCCGGTAAAGGTCGTGTTGGTAAACACAGAAAGCATCCAGGTGGTAGAGGTAAAGCTGGTGGTCAACATCATCACAGAACCAATTTGGATAAATACCATCCAGGTTACTTCGGTAAAGTTGGTCAAAGATACTTCCACAAACAACAATTACATTTCTGGAGACCAGTCTTAAACTTGGACAAGTTGTGGACTTTAGTTCCAGAAGACAAGAGAGACCAATACTTATCTAACTCATCTGCCTCTGCTGCCCCAGTCATTGACACTTTAGCTCACGGTTACGGTAAGGTTTTAGGTAAAGGTCGTTTACCAGAAGTTCCAGTTATCGTCAAGGCTAGATTTGTTTCCAAATTA…	ATGCCTACCAGATTCACTAAAACAAGAAAACACAGAGGTAACGTCTCAGCCGGTAAAGGTCGTGTTGGTAAACACAGAAAGCATCCAGGTGGTAGAGGTAAAGCTGGTGGTCAACATCATCACAGAACCAATTTGGATAAATACCATCCAGGTTACTTCGGTAAAGTTGGTCAAAGATACTTCCACAAACAACAATTACATTTCTGGAGACCAGTCTTAAACTTGGACAAGTTGTGGACTTTAGTTCCAGAAGACAAGAGAGACCAATACTTATCTAACTCATCTGCCTCTGCTGCCCCAGTCATTGACACTTTAGCTCACGGTTACGGTAAGGTTTTAGGTAAAGGTCGTTTACCAGAAGTTCCAGTTATCGTCAAGGCTAGATTTGTTTCCAAATTA…	OK	450	YES	CAA	Glutamine	Glutamine (CAA)
yHMH451_Wickerhamomyces_sp_nov_plate33_PLATANUS.g002041.m1	ATGCCTACCAGATTCACTAAAACAAGAAAACACAGAGGTAACGTCTCAGCCGGTAAAGGTCGTGTTGGTAAACACAGAAAGCATCCAGGTGGTAGAGGTAAAGCTGGTGGTCAACATCATCACAGAACCAATTTGGATAAATACCATCCAGGTTACTTCGGTAAAGTTGGTCAAAGATACTTCCACAAACAACAATTACATTTCTGGAGACCAGTCTTAAACTTGGACAAGTTATGGACTTTAGTTCCAGAAGACAAAAGAGACCAATACTTATCAACCTCATCTGCTTCAGCTGCTCCAGTCATTGACACTTTAGCTCTTGGTTACGGTAAAGTTTTAGGTAAAGGTCGTTTACCAGAAGTTCCAGTTATTGTCAAGGCTAGATTTGTTTCCAAATTA…	ATGCCTACCAGATTCACTAAAACAAGAAAACACAGAGGTAACGTCTCAGCCGGTAAAGGTCGTGTTGGTAAACACAGAAAGCATCCAGGTGGTAGAGGTAAAGCTGGTGGTCAACATCATCACAGAACCAATTTGGATAAATACCATCCAGGTTACTTCGGTAAAGTTGGTCAAAGATACTTCCACAAACAACAATTACATTTCTGGAGACCAGTCTTAAACTTGGACAAGTTATGGACTTTAGTTCCAGAAGACAAAAGAGACCAATACTTATCAACCTCATCTGCTTCAGCTGCTCCAGTCATTGACACTTTAGCTCTTGGTTACGGTAAAGTTTTAGGTAAAGGTCGTTTACCAGAAGTTCCAGTTATTGTCAAGGCTAGATTTGTTTCCAAATTA…	OK	450	YES	CAA	Glutamine	Glutamine (CAA)
yHMPu5000041814_metschnikowia_noctiluminum_180604.haplomerger2_g001400.m1	ATGCCTACCAGATTCACGAAGACCAGAAAGCACAGAGGTAACGTTTCTGCCGGTAAGGGTAGAGTCGGTAAGCACAGAAAGAACCCTGGTGGTCGTGGTATGGCCGGTGGTCAACACCACCACAGAACCAACTTGGACAAGTACCACCCAGGTTACTTCGGTAAGGTTGGTATGAGATACTTCCACAAGCAAAGAAACCACTTCTGGAAGCCACAAATCAACGTTGAGAGATTGTGGTCTTTGGTTGAGGAGGAGAAGCGTGACCAGTACCTCAAGTCTGCCTCTGCTTCCGCTGCCCCAGTCATTGACACCTTGGCCCACGGCTATGGTATTGTTTTGGGTAAGGGTTCTTTGCCAAAGGTTCCTGTTATCGTCAAGGCCAGATTTGTTTCCAAGTTG…	ATGCCTACCAGATTCACGAAGACCAGAAAGCACAGAGGTAACGTTTCTGCCGGTAAGGGTAGAGTCGGTAAGCACAGAAAGAACCCTGGTGGTCGTGGTATGGCCGGTGGTCAACACCACCACAGAACCAACTTGGACAAGTACCACCCAGGTTACTTCGGTAAGGTTGGTATGAGATACTTCCACAAGCAAAGAAACCACTTCTGGAAGCCACAAATCAACGTTGAGAGATTGTGGTCTTTGGTTGAGGAGGAGAAGCGTGACCAGTACCTCAAGTCTGCCTCTGCTTCCGCTGCCCCAGTCATTGACACCTTGGCCCACGGCTATGGTATTGTTTTGGGTAAGGGTTCTTTGCCAAAGGTTCCTGTTATCGTCAAGGCCAGATTTGTTTCCAAGTTG…	OK	450	YES	CAA	Glutamine	Glutamine (CAA)
yHMPu5000037864_metschnikowia_viticola_201018_g003346.m1	ATGCCTACCAGATTCACGAAGACCAGAAAGCACAGAGGTAACGTTTCTGCCGGTAAGGGTAGAGTCGGTAAGCACAGAAAGAACCCTGGTGGTCGTGGTATGGCCGGTGGTCAACACCACCACAGAACCAACTTGGACAAGTACCACCCAGGTTACTTCGGTAAGGTTGGTATGAGATACTTCCACAAGCAAAGAAACCACTTCTGGAAGCCACAAATCAACGTCGAGAGATTGTGGTCTTTGGTTGAGGAGGAGAAGCGTGACCAATACCTCAAGTCTGCCTCTGCTTCCGCTGCCCCAGTCATTGACACCTTGGCTCATGGCTACGGTATTGTCTTGGGTAAGGGTTCTTTGCCAAAGGTCCCTGTTATCGTCAAGGCCAGATTTGTCTCCAAGTTG…	ATGCCTACCAGATTCACGAAGACCAGAAAGCACAGAGGTAACGTTTCTGCCGGTAAGGGTAGAGTCGGTAAGCACAGAAAGAACCCTGGTGGTCGTGGTATGGCCGGTGGTCAACACCACCACAGAACCAACTTGGACAAGTACCACCCAGGTTACTTCGGTAAGGTTGGTATGAGATACTTCCACAAGCAAAGAAACCACTTCTGGAAGCCACAAATCAACGTCGAGAGATTGTGGTCTTTGGTTGAGGAGGAGAAGCGTGACCAATACCTCAAGTCTGCCTCTGCTTCCGCTGCCCCAGTCATTGACACCTTGGCTCATGGCTACGGTATTGTCTTGGGTAAGGGTTCTTTGCCAAAGGTCCCTGTTATCGTCAAGGCCAGATTTGTCTCCAAGTTG…	OK	450	YES	CAA	Glutamine	Glutamine (CAA)
yHMPu5000034592_metschnikowia_bicuspidata_var_bicuspidata_180604_g004443.m1	ATGCCTACCAGATTCACGAAGACCAGAAAGCACAGAGGTAACGTTTCTGCCGGTAAGGGTAGAGTCGGTAAGCACAGAAAGAACCCTGGTGGTCGTGGTATGGCCGGTGGTCAACACCACCACAGAACCAACTTGGACAAGTACCACCCAGGTTACTTCGGTAAGGTTGGTATGAGATACTTCCACAAGCAAAGAAACCACTTCTGGAAGCCACAAATCAACGTCGAGAGATTGTGGTCTTTGGTTGAGGAGGAGAAGCGTGACCAGTACCTCAAGTCTGCTTCTGCCTCTGCTGCCCCAGTCATTGACACCTTGGCCCACGGCTACGGTATTGTCTTGGGTAAGGGCTCCTTGCCAAACGTTCCTGTAATTGTCAAGGCCAGATTTGTTTCCAAGTTG…	ATGCCTACCAGATTCACGAAGACCAGAAAGCACAGAGGTAACGTTTCTGCCGGTAAGGGTAGAGTCGGTAAGCACAGAAAGAACCCTGGTGGTCGTGGTATGGCCGGTGGTCAACACCACCACAGAACCAACTTGGACAAGTACCACCCAGGTTACTTCGGTAAGGTTGGTATGAGATACTTCCACAAGCAAAGAAACCACTTCTGGAAGCCACAAATCAACGTCGAGAGATTGTGGTCTTTGGTTGAGGAGGAGAAGCGTGACCAGTACCTCAAGTCTGCTTCTGCCTCTGCTGCCCCAGTCATTGACACCTTGGCCCACGGCTACGGTATTGTCTTGGGTAAGGGCTCCTTGCCAAACGTTCCTGTAATTGTCAAGGCCAGATTTGTTTCCAAGTTG…	OK	450	YES	CAA	Glutamine	Glutamine (CAA)
yHMPu5000037868_metschnikowia_bicuspidata_var_californica_180604.haplomerger2_g003902.m1	ATGCCTACCAGATTCACGAAGACCAGAAAGCACAGAGGTAACGTTTCTGCCGGTAAGGGTAGAGTCGGTAAGCACAGAAAGAACCCTGGTGGTCGTGGTATGGCCGGTGGTCAACACCACCACAGAACCAACTTGGACAAGTACCACCCAGGTTACTTCGGTAAGGTTGGTATGAGATACTTCCACAAGCAAAGAAACCACTTCTGGAAGCCACAAATCAACGTCGAGAGATTGTGGTCTTTGGTTGAGGAGGAGAAGCGTGACCAGTACCTCAAGTCTGCTTCTGCCTCTGCTGCCCCAGTCATTGACACCTTGGCCCACGGCTACGGTATTGTCTTGGGTAAGGGCTCCTTGCCAAACGTTCCTGTCATTGTCAAGGCCAGATTTGTTTCCAAGTTG…	ATGCCTACCAGATTCACGAAGACCAGAAAGCACAGAGGTAACGTTTCTGCCGGTAAGGGTAGAGTCGGTAAGCACAGAAAGAACCCTGGTGGTCGTGGTATGGCCGGTGGTCAACACCACCACAGAACCAACTTGGACAAGTACCACCCAGGTTACTTCGGTAAGGTTGGTATGAGATACTTCCACAAGCAAAGAAACCACTTCTGGAAGCCACAAATCAACGTCGAGAGATTGTGGTCTTTGGTTGAGGAGGAGAAGCGTGACCAGTACCTCAAGTCTGCTTCTGCCTCTGCTGCCCCAGTCATTGACACCTTGGCCCACGGCTACGGTATTGTCTTGGGTAAGGGCTCCTTGCCAAACGTTCCTGTCATTGTCAAGGCCAGATTTGTTTCCAAGTTG…	OK	450	YES	CAA	Glutamine	Glutamine (CAA)
yHMPu5000041807_metschnikowia_bicuspidata_var_chathamia_190924.haplomerger2_g000479.m1	ATGCCTACCAGATTCACGAAGACCAGAAAGCACAGAGGTAACGTTTCTGCCGGTAAGGGTAGAGTCGGTAAGCACAGAAAGAACCCTGGTGGTCGTGGTATGGCCGGTGGTCAACACCACCACAGAACCAACTTGGACAAGTACCACCCAGGTTACTTCGGTAAGGTTGGTATGAGATACTTCCACAAGCAAAGAAACCACTTCTGGAAGCCACAAATCAACGTCGAGAGATTGTGGTCTTTGGTTGAGGAGGAGAAGCGTGACCAGTACCTCAAGTCTGCTTCTGCCTCTGCTGCCCCAGTCATTGACACCTTGGCCCACGGCTACGGTATTGTCTTGGGTAAGGGCTCCTTGCCAAACGTTCCTGTCATCGTCAAGGCCAGATTTGTTTCTAAGTTG…	ATGCCTACCAGATTCACGAAGACCAGAAAGCACAGAGGTAACGTTTCTGCCGGTAAGGGTAGAGTCGGTAAGCACAGAAAGAACCCTGGTGGTCGTGGTATGGCCGGTGGTCAACACCACCACAGAACCAACTTGGACAAGTACCACCCAGGTTACTTCGGTAAGGTTGGTATGAGATACTTCCACAAGCAAAGAAACCACTTCTGGAAGCCACAAATCAACGTCGAGAGATTGTGGTCTTTGGTTGAGGAGGAGAAGCGTGACCAGTACCTCAAGTCTGCTTCTGCCTCTGCTGCCCCAGTCATTGACACCTTGGCCCACGGCTACGGTATTGTCTTGGGTAAGGGCTCCTTGCCAAACGTTCCTGTCATCGTCAAGGCCAGATTTGTTTCTAAGTTG…	OK	450	YES	CAA	Glutamine	Glutamine (CAA)
yHMPu5000037898_candida_kofuensis_190924_g002247.m1	ATGCCTACCAGATTCACGAAGACCAGAAAGCACAGAGGTAACGTTTCTGCCGGTAAGGGTAGAGTCGGTAAGCACAGAAAGAACCCTGGTGGTCGTGGTATGGCCGGTGGTCAACACCACCACAGAACCAACTTGGACAAGTACCACCCAGGTTACTTCGGTAAGGTTGGTATGAGATACTTCCACAAGCAAAGAAACCACTTCTGGAAGCCACAAATCAACGTCGAGAGATTGTGGTCTTTGGTTGAGGAGGAAAAGCGTGACCAATACCTCAAGTCTGCCTCTGCTTCCGCTGCCCCAGTCATTGACACCTTGGCTCACGGCTACGGTATTGTCTTGGGTAAGGGTTCTTTGCCAAAGGTCCCTGTTATTGTCAAGGCCAGATTTGTCTCCAAGTTG…	ATGCCTACCAGATTCACGAAGACCAGAAAGCACAGAGGTAACGTTTCTGCCGGTAAGGGTAGAGTCGGTAAGCACAGAAAGAACCCTGGTGGTCGTGGTATGGCCGGTGGTCAACACCACCACAGAACCAACTTGGACAAGTACCACCCAGGTTACTTCGGTAAGGTTGGTATGAGATACTTCCACAAGCAAAGAAACCACTTCTGGAAGCCACAAATCAACGTCGAGAGATTGTGGTCTTTGGTTGAGGAGGAAAAGCGTGACCAATACCTCAAGTCTGCCTCTGCTTCCGCTGCCCCAGTCATTGACACCTTGGCTCACGGCTACGGTATTGTCTTGGGTAAGGGTTCTTTGCCAAAGGTCCCTGTTATTGTCAAGGCCAGATTTGTCTCCAAGTTG…	OK	450	YES	CAA	Glutamine	Glutamine (CAA)
yHMPu5000038328_Metschnikowia_henanensis_SPADES.haplomerger2_g003780.m1	ATGCCTACCAGATTCACGAAGACCAGAAAGCACAGAGGTAACGTTTCTGCCGGTAAGGGTAGAGTCGGTAAGCACAGAAAGAACCCCGGTGGTCGTGGTATGGCCGGTGGTCAGCACCACCACAGAACCAACTTGGACAAGTACCACCCAGGTTACTTCGGTAAGGTTGGTATGAGATACTTCCACAAGCAAAGAAACCACTTCTGGAAGCCACAAATCAACGTCGAGAGATTGTGGTCTTTGGTGGAGGAGGAGAAGCGCGACCAATACCTCAAGTCCGCCTCTGCTTCCGCTGCCCCAGTCATTGACACCTTGGCCCACGGCTACGGTGTTGTCTTGGGCAAGGGTGCTTTGCCAAACGTTCCTGTCATTGTCAAGGCCAGATTTGTGTCCAAGTTG…	ATGCCTACCAGATTCACGAAGACCAGAAAGCACAGAGGTAACGTTTCTGCCGGTAAGGGTAGAGTCGGTAAGCACAGAAAGAACCCCGGTGGTCGTGGTATGGCCGGTGGTCAGCACCACCACAGAACCAACTTGGACAAGTACCACCCAGGTTACTTCGGTAAGGTTGGTATGAGATACTTCCACAAGCAAAGAAACCACTTCTGGAAGCCACAAATCAACGTCGAGAGATTGTGGTCTTTGGTGGAGGAGGAGAAGCGCGACCAATACCTCAAGTCCGCCTCTGCTTCCGCTGCCCCAGTCATTGACACCTTGGCCCACGGCTACGGTGTTGTCTTGGGCAAGGGTGCTTTGCCAAACGTTCCTGTCATTGTCAAGGCCAGATTTGTGTCCAAGTTG…	OK	450	YES	CAG	Glutamine	Glutamine (CAG)
yHMPu5000041811_metschnikowia_krissii_170307.haplomerger2_g002235.m1	ATGCCTACCAGATTCACGAAGACCAGAAAGCACAGAGGTAACGTCTCTGCCGGTAAGGGTAGAGTTGGTAAGCACAGAAAGAATCCTGGTGGTCGTGGTATGGCCGGTGGTCAGCACCACCACAGAACCAACTTAGACAAGTACCACCCAGGTTACTTCGGTAAGGTTGGTATGAGATACTTCCACAAGCAGAGAAACCACTTCTGGAAGCCACAAATCAACGTTGAGAGATTGTGGTCTTTGGTTGAAGAGGAGAAGCGCGAGCAATTCCTCAAGTCTGCCTCTAGCTCTGCTGCACCAGTCATTGACACCTTGGCCCACGGCTACGGTATTGTCTTGGGTAAGGGTTCTTTGCCAAAGGTGCCTGTCATTGTCAAGGCCAGATTTGTCTCCAAGTTG…	ATGCCTACCAGATTCACGAAGACCAGAAAGCACAGAGGTAACGTCTCTGCCGGTAAGGGTAGAGTTGGTAAGCACAGAAAGAATCCTGGTGGTCGTGGTATGGCCGGTGGTCAGCACCACCACAGAACCAACTTAGACAAGTACCACCCAGGTTACTTCGGTAAGGTTGGTATGAGATACTTCCACAAGCAGAGAAACCACTTCTGGAAGCCACAAATCAACGTTGAGAGATTGTGGTCTTTGGTTGAAGAGGAGAAGCGCGAGCAATTCCTCAAGTCTGCCTCTAGCTCTGCTGCACCAGTCATTGACACCTTGGCCCACGGCTACGGTATTGTCTTGGGTAAGGGTTCTTTGCCAAAGGTGCCTGTCATTGTCAAGGCCAGATTTGTCTCCAAGTTG…	OK	450	YES	CAG	Glutamine	Glutamine (CAG)
yHMPu5000041804_metschnikowia_vanudenii_190924_g001348.m1	ATGCCTACCAGATTCACGAAGACCAGAAAGCACAGAGGTAACGTCTCTGCCGGTAAGGGTAGAGTTGGTAAGCACAGAAAGAACCCAGGTGGTCGTGGTATGGCTGGTGGTCAACACCACCACAGAACCAACTTGGACAAGTACCACCCAGGTTACTTCGGTAAGGTTGGTATGAGATACTTCCACAAGCAAAGAAACCACTTCTGGAAGCCACAAATCAACGTTGAGAGATTGTGGTCTTTGGTTGAGGAGGAGAAGAGAGACCAATACCTTAAGGCCGCCTCTACCTCTGCTGCCCCAGTCATCGACACTTTGGCTCACGGTTACGGTATCGTCTTGGGTAAGGGTTCCTTGCCAAAGGTCCCTGTCATCGTCAAGGCCAGATTTGTTTCCAAGTTG…	ATGCCTACCAGATTCACGAAGACCAGAAAGCACAGAGGTAACGTCTCTGCCGGTAAGGGTAGAGTTGGTAAGCACAGAAAGAACCCAGGTGGTCGTGGTATGGCTGGTGGTCAACACCACCACAGAACCAACTTGGACAAGTACCACCCAGGTTACTTCGGTAAGGTTGGTATGAGATACTTCCACAAGCAAAGAAACCACTTCTGGAAGCCACAAATCAACGTTGAGAGATTGTGGTCTTTGGTTGAGGAGGAGAAGAGAGACCAATACCTTAAGGCCGCCTCTACCTCTGCTGCCCCAGTCATCGACACTTTGGCTCACGGTTACGGTATCGTCTTGGGTAAGGGTTCCTTGCCAAAGGTCCCTGTCATCGTCAAGGCCAGATTTGTTTCCAAGTTG…	OK	450	YES	CAA	Glutamine	Glutamine (CAA)
yHMPu5000040947_metschnikowia_gruessii_201018_g007049.m1	ATGCCTACCAGATTCACGAAGACCAGAAAGCACAGAGGTAACGTCTCTGCCGGTAAGGGTAGAGTTGGTAAGCACAGAAAGAACCCAGGTGGTCGTGGTATGGCCGGTGGTCAACACCACCACAGAACCAACTTGGACAAGTACCATCCAGGTTACTTCGGTAAGGTTGGTATGAGATACTTCCACAAGCAAAGAAACCACTTCTGGAAGCCACAAATCAACGTCGAGAGATTGTGGTCTTTGGTTGAGGAGGAGAAGAGAGACCAATACCTCAAGGCTGCCTCTACCTCTGCTGCCCCAGTCATTGACACCTTGGCCCACGGTTACGGTATCGTTTTGGGTAAGGGTTCTTTGCCAAAGGTCCCTGTCATTGTCAAGGCCAGATTTGTTTCCAAGTTG…	ATGCCTACCAGATTCACGAAGACCAGAAAGCACAGAGGTAACGTCTCTGCCGGTAAGGGTAGAGTTGGTAAGCACAGAAAGAACCCAGGTGGTCGTGGTATGGCCGGTGGTCAACACCACCACAGAACCAACTTGGACAAGTACCATCCAGGTTACTTCGGTAAGGTTGGTATGAGATACTTCCACAAGCAAAGAAACCACTTCTGGAAGCCACAAATCAACGTCGAGAGATTGTGGTCTTTGGTTGAGGAGGAGAAGAGAGACCAATACCTCAAGGCTGCCTCTACCTCTGCTGCCCCAGTCATTGACACCTTGGCCCACGGTTACGGTATCGTTTTGGGTAAGGGTTCTTTGCCAAAGGTCCCTGTCATTGTCAAGGCCAGATTTGTTTCCAAGTTG…	OK	450	YES	CAA	Glutamine	Glutamine (CAA)
yHMPu5000041861_candida_gelsemii_170307.haplomerger2_g000025.m1	ATGCCTACCAGATTCACGAAGACCAGAAAGCACAGAGGTAACGTCTCTGCCGGTAAGGGTAGAGTCGGTAAGCACAGAAAGAATCCCGGTGGTCGTGGTATGGCCGGTGGTCAACACCACCACAGAACCAACTTGGACAAGTACCATCCAGGTTACTTCGGTAAGGTTGGTATGAGATACTTCCACAAGCAAAGAAACCACTTCTGGAAGCCACAAATCAACGTTGAGAAGTTGTGGTCGTTGGTTGAGGAGGAGAAGAGAGACGAGTACCTCAAGTCTGCTTCTGCCTCTGCTGCCCCAGTTATTGACACCTTGGCCCACGGCTACGGTATTGTCTTGGGTAAGGGAAGCTTGCCACAAGTTCCTGTCATTGTCAAGGCCAGATTTGTCTCCAAGTTG…	ATGCCTACCAGATTCACGAAGACCAGAAAGCACAGAGGTAACGTCTCTGCCGGTAAGGGTAGAGTCGGTAAGCACAGAAAGAATCCCGGTGGTCGTGGTATGGCCGGTGGTCAACACCACCACAGAACCAACTTGGACAAGTACCATCCAGGTTACTTCGGTAAGGTTGGTATGAGATACTTCCACAAGCAAAGAAACCACTTCTGGAAGCCACAAATCAACGTTGAGAAGTTGTGGTCGTTGGTTGAGGAGGAGAAGAGAGACGAGTACCTCAAGTCTGCTTCTGCCTCTGCTGCCCCAGTTATTGACACCTTGGCCCACGGCTACGGTATTGTCTTGGGTAAGGGAAGCTTGCCACAAGTTCCTGTCATTGTCAAGGCCAGATTTGTCTCCAAGTTG…	OK	450	YES	CAA	Glutamine	Glutamine (CAA)
yHMPu5000041857_candida_chrysomelidarum_160928.haplomerger2_g003185.m1	ATGCCTACCAGATTCACGAAGACCAGAAAGCACAGAGGTAACGTCTCTGCCGGTAAGGGTAGAGTCGGTAAGCACAGAAAGAACCCTGGTGGTCGTGGTATGGCTGGTGGTCAGCACCACCACAGAACCAACTTGGACAAGTACCACCCAGGTTACTTCGGTAAGGTTGGTATGAGATACTTCCACAAGCAGAGAAACCACTTCTGGAAGCCACAGATCAACGTTGAGAAGTTGTGGTCTTTGGTTGAGGAGGAGAAGAGAGACGAGTACCTCAAGTCTGCTTCTGCTTCTGCTGCCCCAGTCATCGACACCTTGGCCCACGGTTACGGTATTGTCTTGGGTAAGGGAAGCTTGCCACAAGTTCCTGTCATTGTCAAGGCCAGATTTGTCTCCAAGTTG…	ATGCCTACCAGATTCACGAAGACCAGAAAGCACAGAGGTAACGTCTCTGCCGGTAAGGGTAGAGTCGGTAAGCACAGAAAGAACCCTGGTGGTCGTGGTATGGCTGGTGGTCAGCACCACCACAGAACCAACTTGGACAAGTACCACCCAGGTTACTTCGGTAAGGTTGGTATGAGATACTTCCACAAGCAGAGAAACCACTTCTGGAAGCCACAGATCAACGTTGAGAAGTTGTGGTCTTTGGTTGAGGAGGAGAAGAGAGACGAGTACCTCAAGTCTGCTTCTGCTTCTGCTGCCCCAGTCATCGACACCTTGGCCCACGGTTACGGTATTGTCTTGGGTAAGGGAAGCTTGCCACAAGTTCCTGTCATTGTCAAGGCCAGATTTGTCTCCAAGTTG…	OK	450	YES	CAG	Glutamine	Glutamine (CAG)
yHMPu5000037869_metschnikowia_australis_190924_g004192.m1	ATGCCTACCAGATTCACGAAGACCAGAAAGCACAGAGGTAACGTCTCTGCCGGTAAGGGTAGAGTCGGTAAGCACAGAAAGAACCCTGGTGGTCGTGGTATGGCCGGTGGTCAACACCACCACAGAACTAACTTGGATAAGTACCATCCAGGTTACTTCGGTAAGGTTGGTATGAGATACTTCCACAAGCAAAGAAACCACTTCTGGAAGCCACAAATCAACGTCGAGAGATTGTGGTCTTTGGTTGAGGAGGAGAAGCGTGACCAGTACCTCAAGGCTGCCTCTGCTTCTGCTGCCCCAGTCATTGACACCTTGGCCCACGGCTACGGTATTGTCTTGGGTAAGGGTTCCATGCCAAATGTTCCTGTCATTGTCAGGGCCAGGTTTGTGTCCCAGTTG…	ATGCCTACCAGATTCACGAAGACCAGAAAGCACAGAGGTAACGTCTCTGCCGGTAAGGGTAGAGTCGGTAAGCACAGAAAGAACCCTGGTGGTCGTGGTATGGCCGGTGGTCAACACCACCACAGAACTAACTTGGATAAGTACCATCCAGGTTACTTCGGTAAGGTTGGTATGAGATACTTCCACAAGCAAAGAAACCACTTCTGGAAGCCACAAATCAACGTCGAGAGATTGTGGTCTTTGGTTGAGGAGGAGAAGCGTGACCAGTACCTCAAGGCTGCCTCTGCTTCTGCTGCCCCAGTCATTGACACCTTGGCCCACGGCTACGGTATTGTCTTGGGTAAGGGTTCCATGCCAAATGTTCCTGTCATTGTCAGGGCCAGGTTTGTGTCCCAGTTG…	OK	450	YES	CAA	Glutamine	Glutamine (CAA)
yHMPu5000037208_metschnikowia_baotianmanensis_210210_g002089.m1	ATGCCTACCAGATTCACGAAGACCAGAAAGCACAGAGGTAACGTCTCTGCCGGTAAGGGTAGAATCGGAAAGCACAGAAAGAGCCCTGGTGGACGTGGTATGGCTGGTGGTCAACACCACCACAGAACCAACTTGGACAAGTACCACCCAGGTTACTTCGGTAAGGTCGGTATGAGATACTTCCACAAGCAAAGAAACCACTTCTGGAAGCCACAAATCAACGTCGAGAGATTGTGGTCGTTGGTTGAGGAGGAGAAGCGTGACCAATACCTCAAGTCTGCTTCTACCTCTGCTGCCCCAGTCATTGACACCTTGGCCCACGGCTACGGTATTGTCTTGGGTAAGGGTTCCTTGCCAAAGGTCCCTGTTATTGTCAAGGCCAGATTTGTCTCCAAGTTG…	ATGCCTACCAGATTCACGAAGACCAGAAAGCACAGAGGTAACGTCTCTGCCGGTAAGGGTAGAATCGGAAAGCACAGAAAGAGCCCTGGTGGACGTGGTATGGCTGGTGGTCAACACCACCACAGAACCAACTTGGACAAGTACCACCCAGGTTACTTCGGTAAGGTCGGTATGAGATACTTCCACAAGCAAAGAAACCACTTCTGGAAGCCACAAATCAACGTCGAGAGATTGTGGTCGTTGGTTGAGGAGGAGAAGCGTGACCAATACCTCAAGTCTGCTTCTACCTCTGCTGCCCCAGTCATTGACACCTTGGCCCACGGCTACGGTATTGTCTTGGGTAAGGGTTCCTTGCCAAAGGTCCCTGTTATTGTCAAGGCCAGATTTGTCTCCAAGTTG…	OK	450	YES	CAA	Glutamine	Glutamine (CAA)
yHMPu5000037863_metschnikowia_zobellii_190924_g000093.m1	ATGCCTACCAGATTCACGAAGACCAGAAAGCACAGAGGTAACGTCTCTGCCGGTAAAGGTAGAGTCGGTAAGCACAGAAAGAATCCTGGTGGTCGTGGTATGGCTGGTGGTCAGCACCACCACAGAACCAACTTGGACAAGTACCACCCAGGTTACTTCGGTAAGGTTGGTATGAGATACTTCCACAAGCAAAGAAACCACTTCTGGAAGCCACAAATCAACGTCGAGAGATTGTGGTCTTTGGTTGAGGAGGAGAAGCGCGACCAATTCCTCAAGTCTGCGTCCACCTCTGCTGCCCCAGTCATCGACACCTTGGCCCACGGTTACGGTATTGTCTTGGGTAAGGGCTCTTTGCCAAAGGTGCCTGTCATTGTCAAGGCCAGATTTGTGTCCAAGTTG…	ATGCCTACCAGATTCACGAAGACCAGAAAGCACAGAGGTAACGTCTCTGCCGGTAAAGGTAGAGTCGGTAAGCACAGAAAGAATCCTGGTGGTCGTGGTATGGCTGGTGGTCAGCACCACCACAGAACCAACTTGGACAAGTACCACCCAGGTTACTTCGGTAAGGTTGGTATGAGATACTTCCACAAGCAAAGAAACCACTTCTGGAAGCCACAAATCAACGTCGAGAGATTGTGGTCTTTGGTTGAGGAGGAGAAGCGCGACCAATTCCTCAAGTCTGCGTCCACCTCTGCTGCCCCAGTCATCGACACCTTGGCCCACGGTTACGGTATTGTCTTGGGTAAGGGCTCTTTGCCAAAGGTGCCTGTCATTGTCAAGGCCAGATTTGTGTCCAAGTTG…	OK	450	YES	CAG	Glutamine	Glutamine (CAG)
yHMPu5000034866_zygosaccharomyces_bisporus_160519.g000100.m1	ATGCCTACCAGATTCACCCAAACTAGAAAGCACAGAGGTCACATCTCAGCCGGTTACGGTCGTGTTGGTAAGCACAGAAAGCACCCTGGTGGTAAGGGTATGGCTGGTGGTCAGCACCACCACAGAACCAACTTGGACAGATTCCACCCTGGTTACTTCGGTAAGGTCGGTATGAGATACTTCCGTATCCAAGGTAACCACTTCTGGAAGCCAGTTTTGAACTTGGACAAGTTGTGGACTTTGGTGCCAGAAGAGAAGAGAGACTACTACTTGCAGTCCGCCTCCAAGAGCTCTGCTCCAGTCATTGACACTTTGGCCGCCGGCTACGGTAAGGTCTTGGGTAAGGGTAGAATTCCCCAGGTGCCCGTCATTGTCAAGGCCAGATTTGTTTCTAAGTTG…	ATGCCTACCAGATTCACCCAAACTAGAAAGCACAGAGGTCACATCTCAGCCGGTTACGGTCGTGTTGGTAAGCACAGAAAGCACCCTGGTGGTAAGGGTATGGCTGGTGGTCAGCACCACCACAGAACCAACTTGGACAGATTCCACCCTGGTTACTTCGGTAAGGTCGGTATGAGATACTTCCGTATCCAAGGTAACCACTTCTGGAAGCCAGTTTTGAACTTGGACAAGTTGTGGACTTTGGTGCCAGAAGAGAAGAGAGACTACTACTTGCAGTCCGCCTCCAAGAGCTCTGCTCCAGTCATTGACACTTTGGCCGCCGGCTACGGTAAGGTCTTGGGTAAGGGTAGAATTCCCCAGGTGCCCGTCATTGTCAAGGCCAGATTTGTTTCTAAGTTG…	OK	450	YES	CAG	Glutamine	Glutamine (CAG)
yHMPu5000037918_alloascoidea_africana_180604_g006647.m1	ATGCCTACCAGATTCACCAAGACTAGAAAGCACAGAGGTCACGTAACTGCCGGTTACGGTCGTGTTGGAAAGCACCGCAAGAATCCCGGTGGTAGAGGTATGGCTGGTGGACAGCATCACCACAGGACAAATCTCGACAAGTATCATCCTGGTTATTTTGGTAAAGTGGGTATGCGTTACTTCCACAAGCAGAGGAACCATTTCTGGAGACCCACTCTGAACTTGGATAAACTGTGGAGTTTGGTACCCAGTGAATCAAGAGATAAATTTCTTAGTGCTGCAGATGCAAGCAATGCACCAGTTATCGACACATTGGCTGCTGGTTATGGCAAAGTTTTGGGTAAAGGTAGATTGCCACAAGTACCTGTAATTGTCAAGGCCAGATTTGTTAGTGAATTG…	ATGCCTACCAGATTCACCAAGACTAGAAAGCACAGAGGTCACGTAACTGCCGGTTACGGTCGTGTTGGAAAGCACCGCAAGAATCCCGGTGGTAGAGGTATGGCTGGTGGACAGCATCACCACAGGACAAATCTCGACAAGTATCATCCTGGTTATTTTGGTAAAGTGGGTATGCGTTACTTCCACAAGCAGAGGAACCATTTCTGGAGACCCACTCTGAACTTGGATAAACTGTGGAGTTTGGTACCCAGTGAATCAAGAGATAAATTTCTTAGTGCTGCAGATGCAAGCAATGCACCAGTTATCGACACATTGGCTGCTGGTTATGGCAAAGTTTTGGGTAAAGGTAGATTGCCACAAGTACCTGTAATTGTCAAGGCCAGATTTGTTAGTGAATTG…	OK	450	YES	CAG	Glutamine	Glutamine (CAG)
yHMPu5000034968_candida_maritima_160519.g002357.m1	ATGCCTACCAGATTCACCAAGACCAGAAAGCACAGAGGTCACGTTTCCGCCGGTAAGGGTCGTGTTGGTAAGCACAGAAAGCATCCAGGTGGTAGAGGTATGGCCGGTGGTCAGCACCACCACAGAACTAACTTGGATAAGTACCATCCAGGTTACTTCGGTAAGGTCGGTCAAAGATACTTCCACAAGCAGCAGTTGCACTTCTGGAGACCAACTTTGAACTTGGACAAGCTCTGGACTTTGGTCGCTGAGGACAAGAGAGAGCAGTACCTCTCTTCTGCCTCCGCCTCCGCTGCCCCAGTCATCGACACTTTGGCTGCCGGTTACGGTAAGGTCCTCGGTAAGGGTCGTCTTCCACAGGTTCCAGTCATCGTCAAGGCCAGATTTGTTTCCAAGTTG…	ATGCCTACCAGATTCACCAAGACCAGAAAGCACAGAGGTCACGTTTCCGCCGGTAAGGGTCGTGTTGGTAAGCACAGAAAGCATCCAGGTGGTAGAGGTATGGCCGGTGGTCAGCACCACCACAGAACTAACTTGGATAAGTACCATCCAGGTTACTTCGGTAAGGTCGGTCAAAGATACTTCCACAAGCAGCAGTTGCACTTCTGGAGACCAACTTTGAACTTGGACAAGCTCTGGACTTTGGTCGCTGAGGACAAGAGAGAGCAGTACCTCTCTTCTGCCTCCGCCTCCGCTGCCCCAGTCATCGACACTTTGGCTGCCGGTTACGGTAAGGTCCTCGGTAAGGGTCGTCTTCCACAGGTTCCAGTCATCGTCAAGGCCAGATTTGTTTCCAAGTTG…	OK	450	YES	CAG	Glutamine	Glutamine (CAG)
yHMPu5000035688_Cyberlindnera_xylosilytica_SPADES.g000437.m1	ATGCCTACCAGATTCACCAAGACCAGAAAGCACAGAGGTCACGTTTCCGCCGGTAAGGGTCGTGTTGGTAAGCACAGAAAGCACCCAGGTGGTAGAGGTATGGCCGGTGGTCAGCACCACCACAGAACCAACTTGGACAAGTACCACCCAGGTTACTTCGGTAAGGTTGGTCAGAGATACTTCCACAAGCAGCAGTTGCACTTCTGGAGACCAACTTTGAACTTGGACAAGCTCTGGACTTTGGTCCCAGAGGAGAAGAGAGAGCAGTACTTGTCTTCTGCTTCCGCTTCCGCTGCTCCAGTCATCGACACTTTGGCTGCCGGCTACGGTAAGGTCCTCGCTAAGGGTCGTCTCCCACAGGTTCCAGTCATTGTCAAGGCTAGATTTGTCTCTAAGTTG…	ATGCCTACCAGATTCACCAAGACCAGAAAGCACAGAGGTCACGTTTCCGCCGGTAAGGGTCGTGTTGGTAAGCACAGAAAGCACCCAGGTGGTAGAGGTATGGCCGGTGGTCAGCACCACCACAGAACCAACTTGGACAAGTACCACCCAGGTTACTTCGGTAAGGTTGGTCAGAGATACTTCCACAAGCAGCAGTTGCACTTCTGGAGACCAACTTTGAACTTGGACAAGCTCTGGACTTTGGTCCCAGAGGAGAAGAGAGAGCAGTACTTGTCTTCTGCTTCCGCTTCCGCTGCTCCAGTCATCGACACTTTGGCTGCCGGCTACGGTAAGGTCCTCGCTAAGGGTCGTCTCCCACAGGTTCCAGTCATTGTCAAGGCTAGATTTGTCTCTAAGTTG…	OK	450	YES	CAG	Glutamine	Glutamine (CAG)
yHMPu5000035689_candida_mycetangii_160613.g004421.m1	ATGCCTACCAGATTCACCAAGACCAGAAAGCACAGAGGTCACGTTTCCGCCGGTAAGGGTCGTGTTGGTAAACACAGAAAACATCCAGGTGGTAGAGGTATGGCCGGTGGTCAGCACCACCACAGAATTAACATGGATAAGTACCATCCAGGTTACTTCGGTAAGGTCGGTCAGAGATACTTCCACAAGCAGCAGTTGCACTTCTGGAGACCAACTCTGAACTTGGACAAGCTCTGGACTTTGGTCGCTGAGGACAAGAGAGAGCAGTACCTCTCTTCTGCCTCCGCTTCCGCCGCTCCAGTCATTGACACTTTGGCTGCCGGTTACGGTAAAGTCCTCGGTAAGGGTCGTCTTCCACAGGTTCCAGTCATCGTCAAGGCCAGATTTGTTTCCAAGTTG…	ATGCCTACCAGATTCACCAAGACCAGAAAGCACAGAGGTCACGTTTCCGCCGGTAAGGGTCGTGTTGGTAAACACAGAAAACATCCAGGTGGTAGAGGTATGGCCGGTGGTCAGCACCACCACAGAATTAACATGGATAAGTACCATCCAGGTTACTTCGGTAAGGTCGGTCAGAGATACTTCCACAAGCAGCAGTTGCACTTCTGGAGACCAACTCTGAACTTGGACAAGCTCTGGACTTTGGTCGCTGAGGACAAGAGAGAGCAGTACCTCTCTTCTGCCTCCGCTTCCGCCGCTCCAGTCATTGACACTTTGGCTGCCGGTTACGGTAAAGTCCTCGGTAAGGGTCGTCTTCCACAGGTTCCAGTCATCGTCAAGGCCAGATTTGTTTCCAAGTTG…	OK	450	YES	CAG	Glutamine	Glutamine (CAG)
yHMPu5000035702_cyberlindnera_amylophila_160613.haplomerger2.g004281.m1	ATGCCTACCAGATTCACCAAGACCAGAAAGCACAGAGGTCACGTTTCCGCCGGTAAGGGTCGTGTCGGTAAGCACAGAAAGCACCCGGGTGGTAGAGGTATGGCTGGTGGTCAGCACCACCACAGAACCAACTTGGATAAGTACCACCCAGGTTACTTCGGTAAGGTTGGTCAGAGATACTTCCACAAGCAGCTTTTGCACTTCTGGAGACCAACTTTGAACTTGGACAAGCTTTGGACTTTGGTCCCAGAGGAGAAGAGAGAGCAGTACTTGGCCTCTTCTTCTTCTTCCGCTGCCCCAGTTATTGACACTTTGGCTGCCGGTTACGGTAAGGTCCTCGGTAAGGGTCGTTTGCCACAGGTTCCAGTCATTGTCAAGGCTAGATTCGTCTCCAAGTTG…	ATGCCTACCAGATTCACCAAGACCAGAAAGCACAGAGGTCACGTTTCCGCCGGTAAGGGTCGTGTCGGTAAGCACAGAAAGCACCCGGGTGGTAGAGGTATGGCTGGTGGTCAGCACCACCACAGAACCAACTTGGATAAGTACCACCCAGGTTACTTCGGTAAGGTTGGTCAGAGATACTTCCACAAGCAGCTTTTGCACTTCTGGAGACCAACTTTGAACTTGGACAAGCTTTGGACTTTGGTCCCAGAGGAGAAGAGAGAGCAGTACTTGGCCTCTTCTTCTTCTTCCGCTGCCCCAGTTATTGACACTTTGGCTGCCGGTTACGGTAAGGTCCTCGGTAAGGGTCGTTTGCCACAGGTTCCAGTCATTGTCAAGGCTAGATTCGTCTCCAAGTTG…	OK	450	YES	CAG	Glutamine	Glutamine (CAG)
yHMPu5000038105_candida_maesa_201018.g005518.m1	ATGCCTACCAGATTCACCAAGACCAGAAAGCACAGAGGTCACGTTTCCGCCGGTAAGGGTCGTGTCGGTAAGCACAGAAAGCACCCGGGTGGTAGAGGTATGGCCGGTGGTCAGCACCACCACAGAATTAACTTGGATAAGTACCATCCAGGTTACTTCGGTAAGGTTGGTCAGAGATACTTCCACAAGCAGCAGTTGCACTTCTGGAAGCCAACCTTGAACTTGGACAAGCTTTGGACTTTGGTTCCAGAAGAGAAGAGAGACCAGTACTTGACCTCTGCTTCTGCTTCCGCTGCTCCAGTTATTGACACCTTGGCTGCCGGTTACGGTAAGGTCCTCGGTAAGGGTCGTCTTCCACAGGTTCCAGTCATCGTCAAGGCCAGATTTGTTTCCAAGTTG…	ATGCCTACCAGATTCACCAAGACCAGAAAGCACAGAGGTCACGTTTCCGCCGGTAAGGGTCGTGTCGGTAAGCACAGAAAGCACCCGGGTGGTAGAGGTATGGCCGGTGGTCAGCACCACCACAGAATTAACTTGGATAAGTACCATCCAGGTTACTTCGGTAAGGTTGGTCAGAGATACTTCCACAAGCAGCAGTTGCACTTCTGGAAGCCAACCTTGAACTTGGACAAGCTTTGGACTTTGGTTCCAGAAGAGAAGAGAGACCAGTACTTGACCTCTGCTTCTGCTTCCGCTGCTCCAGTTATTGACACCTTGGCTGCCGGTTACGGTAAGGTCCTCGGTAAGGGTCGTCTTCCACAGGTTCCAGTCATCGTCAAGGCCAGATTTGTTTCCAAGTTG…	OK	450	YES	CAG	Glutamine	Glutamine (CAG)
yHMPu5000035703_cyberlindnera_americana_160613.g000343.m1	ATGCCTACCAGATTCACCAAGACCAGAAAGCACAGAGGTCACGTTTCCGCCGGTAAGGGTCGTGTCGGTAAGCACAGAAAGCACCCGGGTGGTAGAGGTATGGCCGGTGGTCAGCACCACCACAGAACTAACTTGGATAAGTACCATCCAGGTTACTTCGGTAAGGTCGGTCAGAGATACTTCCACAAGCAGCAGTTGCACTTCTGGAGACCAACTTTGAACTTGGACAAGCTTTGGACTTTGGTCGCTGAGGACAAGAGAGAACAGTACTTGGCCTCTTCCTCCGCTTCCGCTGCTCCAGTCATCGACACCTTGGCTGCCGGTTACGGTAAGGTCCTCGGTAAGGGTCGTCTTCCACAGGTTCCAGTCATCGTCAAGGCCAGATTTGTTTCCAAGTTG…	ATGCCTACCAGATTCACCAAGACCAGAAAGCACAGAGGTCACGTTTCCGCCGGTAAGGGTCGTGTCGGTAAGCACAGAAAGCACCCGGGTGGTAGAGGTATGGCCGGTGGTCAGCACCACCACAGAACTAACTTGGATAAGTACCATCCAGGTTACTTCGGTAAGGTCGGTCAGAGATACTTCCACAAGCAGCAGTTGCACTTCTGGAGACCAACTTTGAACTTGGACAAGCTTTGGACTTTGGTCGCTGAGGACAAGAGAGAACAGTACTTGGCCTCTTCCTCCGCTTCCGCTGCTCCAGTCATCGACACCTTGGCTGCCGGTTACGGTAAGGTCCTCGGTAAGGGTCGTCTTCCACAGGTTCCAGTCATCGTCAAGGCCAGATTTGTTTCCAAGTTG…	OK	450	YES	CAG	Glutamine	Glutamine (CAG)
yHMPu5000038067_cyberlindnera_bimundalis_190924.g004252.m1	ATGCCTACCAGATTCACCAAGACCAGAAAGCACAGAGGTCACGTTTCCGCCGGTAAGGGTCGTGTCGGTAAGCACAGAAAGCACCCGGGTGGTAGAGGTATGGCCGGTGGTCAGCACCACCACAGAACTAACTTGGATAAGTACCATCCAGGTTACTTCGGTAAGGTCGGTCAGAGATACTTCCACAAGCAGCAGTTGCACTTCTGGAGACCAACCTTGAACTTGGACAAGCTTTGGACTTTGGTCGCTGAGGACAAGAGAGACCAGTACTTGGCCTCCTCTTCTGCCTCCGCTGCCCCAGTCATTGACACTTTGGCTGCCGGTTACGGTAAGGTCCTCGGTAAGGGTCGTCTCCCACAGGTTCCAGTCATCGTCAAGGCCAGATTTGTTTCCAAGTTG…	ATGCCTACCAGATTCACCAAGACCAGAAAGCACAGAGGTCACGTTTCCGCCGGTAAGGGTCGTGTCGGTAAGCACAGAAAGCACCCGGGTGGTAGAGGTATGGCCGGTGGTCAGCACCACCACAGAACTAACTTGGATAAGTACCATCCAGGTTACTTCGGTAAGGTCGGTCAGAGATACTTCCACAAGCAGCAGTTGCACTTCTGGAGACCAACCTTGAACTTGGACAAGCTTTGGACTTTGGTCGCTGAGGACAAGAGAGACCAGTACTTGGCCTCCTCTTCTGCCTCCGCTGCCCCAGTCATTGACACTTTGGCTGCCGGTTACGGTAAGGTCCTCGGTAAGGGTCGTCTCCCACAGGTTCCAGTCATCGTCAAGGCCAGATTTGTTTCCAAGTTG…	OK	450	YES	CAG	Glutamine	Glutamine (CAG)
yHMPu5000038345_cyberlindnera_veronae_170713.g005645.m1	ATGCCTACCAGATTCACCAAGACCAGAAAGCACAGAGGTCACGTTTCCGCCGGTAAGGGTCGTGTCGGTAAGCACAGAAAGCACCCGGGTGGTAGAGGTATGGCCGGTGGTCAGCACCACCACAGAACTAACTTGGATAAGTACCACCCAGGTTACTTCGGTAAGGTCGGTCAGAGATACTTCCACAAGCAGCAGTTGCACTTCTGGAGACCAACTTTGAACTTGGACAAGCTCTGGACTTTGATCCCAGAGGAGAAGAGAGACCAGTACTTGGCTTCTTCTTCTGCTTCCGCTGCTCCAGTTATCGACACTTTGGCTGCCGGATACGGTAAGGTCCTCGGTAAGGGTCGTCTCCCACAGGTTCCAGTCATCGTCAAGGCCAGATTTGTTTCCAAGTTG…	ATGCCTACCAGATTCACCAAGACCAGAAAGCACAGAGGTCACGTTTCCGCCGGTAAGGGTCGTGTCGGTAAGCACAGAAAGCACCCGGGTGGTAGAGGTATGGCCGGTGGTCAGCACCACCACAGAACTAACTTGGATAAGTACCACCCAGGTTACTTCGGTAAGGTCGGTCAGAGATACTTCCACAAGCAGCAGTTGCACTTCTGGAGACCAACTTTGAACTTGGACAAGCTCTGGACTTTGATCCCAGAGGAGAAGAGAGACCAGTACTTGGCTTCTTCTTCTGCTTCCGCTGCTCCAGTTATCGACACTTTGGCTGCCGGATACGGTAAGGTCCTCGGTAAGGGTCGTCTCCCACAGGTTCCAGTCATCGTCAAGGCCAGATTTGTTTCCAAGTTG…	OK	450	YES	CAG	Glutamine	Glutamine (CAG)
yHMPu5000035698_cyberlindnera_meyerae_160519.haplomerger2.g004149.m1	ATGCCTACCAGATTCACCAAGACCAGAAAGCACAGAGGTCACGTTTCCGCCGGTAAGGGTCGTGTCGGTAAGCACAGAAAGCACCCGGGTGGTAGAGGTATGGCCGGTGGTCAGCACCACCACAGAACTAACTTGGACAAGTACCACCCAGGTTACTTCGGTAAGGTCGGTCAGAGATACTTCCACAAGCAGCAGCTTCACTTCTGGAGACCAACTTTGAACTTGGACAAGCTTTGGACTTTGGTTCCAGAGGAGAAGAGAGACCAGTACTTGGCCTCTGCTTCTGCTTCTGCTGCCCCAGTCATTGACACCTTGGCTGCCGGTTACGGTAAGGTCCTCGGTAAGGGTCGTCTCCCACAGGTTCCAGTCATCGTCAAGGCCAGATTTGTTTCCAAGTTG…	ATGCCTACCAGATTCACCAAGACCAGAAAGCACAGAGGTCACGTTTCCGCCGGTAAGGGTCGTGTCGGTAAGCACAGAAAGCACCCGGGTGGTAGAGGTATGGCCGGTGGTCAGCACCACCACAGAACTAACTTGGACAAGTACCACCCAGGTTACTTCGGTAAGGTCGGTCAGAGATACTTCCACAAGCAGCAGCTTCACTTCTGGAGACCAACTTTGAACTTGGACAAGCTTTGGACTTTGGTTCCAGAGGAGAAGAGAGACCAGTACTTGGCCTCTGCTTCTGCTTCTGCTGCCCCAGTCATTGACACCTTGGCTGCCGGTTACGGTAAGGTCCTCGGTAAGGGTCGTCTCCCACAGGTTCCAGTCATCGTCAAGGCCAGATTTGTTTCCAAGTTG…	OK	450	YES	CAG	Glutamine	Glutamine (CAG)
yHMPu5000035337_cyberlindnera_mississippiensis_190924.g004615.m1	ATGCCTACCAGATTCACCAAGACCAGAAAGCACAGAGGTCACGTTTCCGCCGGTAAGGGTCGTGTCGGTAAGCACAGAAAGCACCCGGGTGGTAGAGGTATGGCCGGTGGTCAGCACCACCACAGAACCAATTTGGATAAGTACCACCCAGGTTACTTCGGTAAGGTTGGTCAGAGATACTTCCACAAGCAGCTCTTGCACTTCTGGAGACCAACTTTGAACTTGGACAAGCTTTGGACTTTGGTTCCAGAGGAGAAGAGAGAGCAGTACTTGGCTTCCTCTTCCTCTTCCGCTGCCCCAGTCATTGACACTTTGGCTGCCGGTTACGGTAAGGTCCTCGGTAAGGGTCGTTTGCCACAGGTCCCAGTCATTGTCAAGGCCAGATTCGTCTCCAAGTTG…	ATGCCTACCAGATTCACCAAGACCAGAAAGCACAGAGGTCACGTTTCCGCCGGTAAGGGTCGTGTCGGTAAGCACAGAAAGCACCCGGGTGGTAGAGGTATGGCCGGTGGTCAGCACCACCACAGAACCAATTTGGATAAGTACCACCCAGGTTACTTCGGTAAGGTTGGTCAGAGATACTTCCACAAGCAGCTCTTGCACTTCTGGAGACCAACTTTGAACTTGGACAAGCTTTGGACTTTGGTTCCAGAGGAGAAGAGAGAGCAGTACTTGGCTTCCTCTTCCTCTTCCGCTGCCCCAGTCATTGACACTTTGGCTGCCGGTTACGGTAAGGTCCTCGGTAAGGGTCGTTTGCCACAGGTCCCAGTCATTGTCAAGGCCAGATTCGTCTCCAAGTTG…	OK	450	YES	CAG	Glutamine	Glutamine (CAG)
yHMPu5000035701_cyberlindnera_fabianii_160519.g004973.m1	ATGCCTACCAGATTCACCAAGACCAGAAAGCACAGAGGTCACGTTTCCGCCGGTAAGGGTCGTGTCGGTAAGCACAGAAAGCACCCGGGTGGTAGAGGTATGGCCGGTGGTCAGCACCACCACAGAACCAACTTGGATAAGTACCACCCAGGTTACTTCGGTAAGGTTGGTCAGAGATACTTCCACAAGCAGCAGTTGCACTTCTGGAGACCAACTTTGAACTTGGACAAGCTTTGGACTTTGGTCCCAGAGGAGAAGAGAGAGTCTTACCTTTCTTCCGCTTCTTCCTCCGCTGCTCCAGTCATTGACACTTTGGCTGCCGGTTACGGTAAGGTCCTTGCTAAGGGTCGTCTCCCACAGGTTCCAGTCATCGTCAAGGCCAGATTTGTTTCCAAGTTG…	ATGCCTACCAGATTCACCAAGACCAGAAAGCACAGAGGTCACGTTTCCGCCGGTAAGGGTCGTGTCGGTAAGCACAGAAAGCACCCGGGTGGTAGAGGTATGGCCGGTGGTCAGCACCACCACAGAACCAACTTGGATAAGTACCACCCAGGTTACTTCGGTAAGGTTGGTCAGAGATACTTCCACAAGCAGCAGTTGCACTTCTGGAGACCAACTTTGAACTTGGACAAGCTTTGGACTTTGGTCCCAGAGGAGAAGAGAGAGTCTTACCTTTCTTCCGCTTCTTCCTCCGCTGCTCCAGTCATTGACACTTTGGCTGCCGGTTACGGTAAGGTCCTTGCTAAGGGTCGTCTCCCACAGGTTCCAGTCATCGTCAAGGCCAGATTTGTTTCCAAGTTG…	OK	450	YES	CAG	Glutamine	Glutamine (CAG)
yHMPu5000038121_candida_hungchunana_170912.g001507.m1	ATGCCTACCAGATTCACCAAGACCAGAAAGCACAGAGGTCACGTTTCCGCCGGTAAGGGTCGTGTCGGTAAGCACAGAAAGCACCCGGGTGGTAGAGGTATGGCCGGTGGTCAGCACCACCACAGAACCAACTTGGACAAGTACCACCCAGGTTACTTCGGTAAGGTTGGTCAGAGATACTTCCACAAGCAGCAGTTGCACTTCTGGAGACCAACTTTGAACTTGGACAAGCTCTGGACTTTGGTTCCAGAGGAGAAGAGAGACCAGTACTTGGCCTCTGCTTCTGCTTCCGCTGCTCCAGTCATCGACACCTTGGCTGCCGGTTACGGTAAGGTCCTCGGTAAGGGTCGTCTTCCACAGGTTCCAGTCATCGTCAAGGCCAGATTTGTTTCCAAGTTG…	ATGCCTACCAGATTCACCAAGACCAGAAAGCACAGAGGTCACGTTTCCGCCGGTAAGGGTCGTGTCGGTAAGCACAGAAAGCACCCGGGTGGTAGAGGTATGGCCGGTGGTCAGCACCACCACAGAACCAACTTGGACAAGTACCACCCAGGTTACTTCGGTAAGGTTGGTCAGAGATACTTCCACAAGCAGCAGTTGCACTTCTGGAGACCAACTTTGAACTTGGACAAGCTCTGGACTTTGGTTCCAGAGGAGAAGAGAGACCAGTACTTGGCCTCTGCTTCTGCTTCCGCTGCTCCAGTCATCGACACCTTGGCTGCCGGTTACGGTAAGGTCCTCGGTAAGGGTCGTCTTCCACAGGTTCCAGTCATCGTCAAGGCCAGATTTGTTTCCAAGTTG…	OK	450	YES	CAG	Glutamine	Glutamine (CAG)
yHMPu5000026073_candida_easanensis_180604.g006261.m1	ATGCCTACCAGATTCACCAAGACCAGAAAGCACAGAGGTCACGTTTCCGCCGGTAAGGGTCGTGTCGGTAAGCACAGAAAGCACCCAGGTGGTAGAGGTATGGCCGGTGGTCAGCACCACCACAGAACCAACTTGGATAAGTACCACCCAGGTTACTTCGGTAAGGTTGGTCAGAGATACTTCCACAAGCAGCAGTTGCACTTCTGGAAGCCATCTGTGAACTTGGACAAGCTCTGGACTTTGGTCCCAGAGGAGAAGAGAGAGCAGTACTTGTCTTCTGCTTCCGCTTCTGCTGCTCCAGTTATTGACACTTTGGCTGCTGGCTACGGTAAGGTCCTCGGTAAGGGTCGTTTGCCACAGGTCCCAGTCATCGTTAAGGCTAGATTTGTCTCCAAGTTG…	ATGCCTACCAGATTCACCAAGACCAGAAAGCACAGAGGTCACGTTTCCGCCGGTAAGGGTCGTGTCGGTAAGCACAGAAAGCACCCAGGTGGTAGAGGTATGGCCGGTGGTCAGCACCACCACAGAACCAACTTGGATAAGTACCACCCAGGTTACTTCGGTAAGGTTGGTCAGAGATACTTCCACAAGCAGCAGTTGCACTTCTGGAAGCCATCTGTGAACTTGGACAAGCTCTGGACTTTGGTCCCAGAGGAGAAGAGAGAGCAGTACTTGTCTTCTGCTTCCGCTTCTGCTGCTCCAGTTATTGACACTTTGGCTGCTGGCTACGGTAAGGTCCTCGGTAAGGGTCGTTTGCCACAGGTCCCAGTCATCGTTAAGGCTAGATTTGTCTCCAAGTTG…	OK	450	YES	CAG	Glutamine	Glutamine (CAG)
yHMPu5000035700_cyberlindnera_japonica_160519.g004059.m1	ATGCCTACCAGATTCACCAAGACCAGAAAGCACAGAGGTCACGTTTCCGCCGGTAAGGGTCGTGTCGGTAAGCACAGAAAGCACCCAGGTGGTAGAGGTATGGCCGGTGGTCAGCACCACCACAGAACCAACTTGGACAAGTACCATCCAGGTTACTTCGGTAAGGTTGGTCAGAGATACTTCCACAAGCAGCAGTTGCACTTCTGGAAGCCAACTTTGAACTTGGACAAGCTCTGGACTTTGGTCCCAGAAGAGAAGAGAGAGCAGTACCTTGCTTCCTCCTCTGCTTCCGCTGCCCCAGTTATTGACACTTTGGCTGCTGGCTACGGTAAGGTCCTTGCTAAGGGTCGTTTGCCACAGGTCCCAGTCATTGTTAAGGCTAGATTTGTCTCCAAGTTG…	ATGCCTACCAGATTCACCAAGACCAGAAAGCACAGAGGTCACGTTTCCGCCGGTAAGGGTCGTGTCGGTAAGCACAGAAAGCACCCAGGTGGTAGAGGTATGGCCGGTGGTCAGCACCACCACAGAACCAACTTGGACAAGTACCATCCAGGTTACTTCGGTAAGGTTGGTCAGAGATACTTCCACAAGCAGCAGTTGCACTTCTGGAAGCCAACTTTGAACTTGGACAAGCTCTGGACTTTGGTCCCAGAAGAGAAGAGAGAGCAGTACCTTGCTTCCTCCTCTGCTTCCGCTGCCCCAGTTATTGACACTTTGGCTGCTGGCTACGGTAAGGTCCTTGCTAAGGGTCGTTTGCCACAGGTCCCAGTCATTGTTAAGGCTAGATTTGTCTCCAAGTTG…	OK	450	YES	CAG	Glutamine	Glutamine (CAG)
yHMPu5000037872_cyberlindnera_euphorbiiphila_180604.g000862.m1	ATGCCTACCAGATTCACCAAGACCAGAAAGCACAGAGGTCACGTTTCCGCCGGTAAGGGTCGTGTCGGTAAGCACAGAAAGCACCCAGGTGGTAGAGGTATGGCCGGTGGTCAGCACCACCACAGAACCAACTTGGACAAGTACCACCCAGGTTACTTCGGTAAGGTTGGTCAGAGATACTTCCACAAGCAGCAGTTGCAGTTCTGGAGACCAACTTTGAACTTGGACAAGCTTTGGACTTTGGTTGATGAGGAGAAGAGAGACCAGTACTTGGCCTCCTCTTCTGCCTCGGCTGCTCCAGTTATTGACACCTTGGCTGCCGGTTACGGTAAGGTCCTCGGTAAGGGTCGTTTGCCACAGGTTCCAGTCATCGTCAAGGCCAGATTTGTTTCCAAGTTG…	ATGCCTACCAGATTCACCAAGACCAGAAAGCACAGAGGTCACGTTTCCGCCGGTAAGGGTCGTGTCGGTAAGCACAGAAAGCACCCAGGTGGTAGAGGTATGGCCGGTGGTCAGCACCACCACAGAACCAACTTGGACAAGTACCACCCAGGTTACTTCGGTAAGGTTGGTCAGAGATACTTCCACAAGCAGCAGTTGCAGTTCTGGAGACCAACTTTGAACTTGGACAAGCTTTGGACTTTGGTTGATGAGGAGAAGAGAGACCAGTACTTGGCCTCCTCTTCTGCCTCGGCTGCTCCAGTTATTGACACCTTGGCTGCCGGTTACGGTAAGGTCCTCGGTAAGGGTCGTTTGCCACAGGTTCCAGTCATCGTCAAGGCCAGATTTGTTTCCAAGTTG…	OK	450	YES	CAG	Glutamine	Glutamine (CAG)
yHMPu5000038113_candida_adriatica_170912.g005465.m1	ATGCCTACCAGATTCACCAAGACCAGAAAGCACAGAGGTCACGTTTCCGCCGGTAAGGGTCGTGTCGGTAAGCACAGAAAGCACCCAGGTGGTAGAGGTATGGCCGGTGGTCAGCACCACCACAGAACCAACTTGGACAAGTACCACCCAGGTTACTTCGGTAAGGTTGGTCAGAGATACTTCCACAAGCAGCAGTTGCACTTCTGGAGACCAACTCTGAACTTGGACAAGCTCTGGACTCTTGTTCCAGAGGAGAAGAGAGAGCAGTACATTGCCTCCGCTTCTGCTTCCGCTGCTCCAGTCATCGACACTCTCGCTGCTGGCTACGGTAAGGTTCTTGGTAAGGGCCGTCTCCCACAGGTTCCAGTCATTGTCAAGGCTAGATTCGTTTCCAAGTTG…	ATGCCTACCAGATTCACCAAGACCAGAAAGCACAGAGGTCACGTTTCCGCCGGTAAGGGTCGTGTCGGTAAGCACAGAAAGCACCCAGGTGGTAGAGGTATGGCCGGTGGTCAGCACCACCACAGAACCAACTTGGACAAGTACCACCCAGGTTACTTCGGTAAGGTTGGTCAGAGATACTTCCACAAGCAGCAGTTGCACTTCTGGAGACCAACTCTGAACTTGGACAAGCTCTGGACTCTTGTTCCAGAGGAGAAGAGAGAGCAGTACATTGCCTCCGCTTCTGCTTCCGCTGCTCCAGTCATCGACACTCTCGCTGCTGGCTACGGTAAGGTTCTTGGTAAGGGCCGTCTCCCACAGGTTCCAGTCATTGTCAAGGCTAGATTCGTTTCCAAGTTG…	OK	450	YES	CAG	Glutamine	Glutamine (CAG)
yHMPu5000035325_cyberlindnera_petersonii_180604.g004527.m1	ATGCCTACCAGATTCACCAAGACCAGAAAGCACAGAGGTCACGTTTCCGCCGGTAAGGGTCGTGTCGGTAAGCACAGAAAGCACCCAGGTGGTAGAGGTAAGGCCGGTGGTCAGCACCACCACAGAATTAACATGGATAAGTACCATCCAGGTTACTTCGGTAAGGTCGGTCAGAGATACTTCCACAAGCAGCAGTTGCACTTCTGGAAGCCAACTTTGAACTTGGACAAGCTTTGGACTTTGGTTGCCGAGGACAAGAGAGAGCAGTACCTCTCTTCTGCCTCTGCTTCTGCTGCTCCAGTCATTGACACCTTGGCTGCCGGTTACGGTAAGGTCCTTGGTAAGGGTCGTCTCCCAGAGGTTCCAGTCATCGTCAAGGCCAGATACGTTTCCAAGTTG…	ATGCCTACCAGATTCACCAAGACCAGAAAGCACAGAGGTCACGTTTCCGCCGGTAAGGGTCGTGTCGGTAAGCACAGAAAGCACCCAGGTGGTAGAGGTAAGGCCGGTGGTCAGCACCACCACAGAATTAACATGGATAAGTACCATCCAGGTTACTTCGGTAAGGTCGGTCAGAGATACTTCCACAAGCAGCAGTTGCACTTCTGGAAGCCAACTTTGAACTTGGACAAGCTTTGGACTTTGGTTGCCGAGGACAAGAGAGAGCAGTACCTCTCTTCTGCCTCTGCTTCTGCTGCTCCAGTCATTGACACCTTGGCTGCCGGTTACGGTAAGGTCCTTGGTAAGGGTCGTCTCCCAGAGGTTCCAGTCATCGTCAAGGCCAGATACGTTTCCAAGTTG…	OK	450	YES	CAG	Glutamine	Glutamine (CAG)
yHMPu5000038346_cyberlindnera_rhodanensis_170713.haplomerger2.g005843.m1	ATGCCTACCAGATTCACCAAGACCAGAAAGCACAGAGGTCACGTTTCCGCCGGTAAGGGTCGTGTCGGTAAGCACAGAAAGCACCCAGGTGGTAGAGGTAAGGCCGGTGGTCAGCACCACCACAGAACCAACTTGGACAAGTACCACCCAGGTTACTTCGGTAAGGTTGGTCAGAGATACTTCCACAAGCAGCAGTTGCACTTCTGGAGACCAACTTTGAACTTGGACAAGCTTTGGACTTTGGTTCCAGAGGAGAAGAGAGACCAGTACTTGGCCTCCTCTTCTGCTTCCGCTGCTCCAGTCATTGACACCTTGGCTGCCGGTTACGGTAAGGTCCTCGGTAAGGGTCGTCTCCCAGAGGTCCCAGTCATTGTCAAGGCCAGATTTGTCTCCAAGTTG…	ATGCCTACCAGATTCACCAAGACCAGAAAGCACAGAGGTCACGTTTCCGCCGGTAAGGGTCGTGTCGGTAAGCACAGAAAGCACCCAGGTGGTAGAGGTAAGGCCGGTGGTCAGCACCACCACAGAACCAACTTGGACAAGTACCACCCAGGTTACTTCGGTAAGGTTGGTCAGAGATACTTCCACAAGCAGCAGTTGCACTTCTGGAGACCAACTTTGAACTTGGACAAGCTTTGGACTTTGGTTCCAGAGGAGAAGAGAGACCAGTACTTGGCCTCCTCTTCTGCTTCCGCTGCTCCAGTCATTGACACCTTGGCTGCCGGTTACGGTAAGGTCCTCGGTAAGGGTCGTCTCCCAGAGGTCCCAGTCATTGTCAAGGCCAGATTTGTCTCCAAGTTG…	OK	450	YES	CAG	Glutamine	Glutamine (CAG)
yHMPu5000038078_candida_taoyuanica_170912.g001217.m1	ATGCCTACCAGATTCACCAAGACCAGAAAGCACAGAGGTCACGTTTCCGCCGGTAAGGGTCGTATCGGTAAGCACAGAAAGCACCCGGGTGGTAGAGGTATGGCCGGTGGTCAGCACCACCACAGAACTAACTTGGACAAGTACCATCCAGGTTACTTCGGTAAGGTTGGTCAGAGATACTTCCACAAGCAGCAGTTGCACTTCTGGAGACCAACTTTGAACTTGGACAAGCTTTGGACTTTGGTTCCAGAGGAGAAGAGAGACCAGTACTTGGCCTCTGCCTCTGCCTCTGCTGCTCCAGTTATCGACACATTGGCTGCCGGTTACGGTAAGGTCCTCGCCAAGGGCCGTTTGCCACAGGTTCCAGTCATCGTCAAGGCTAGATTTGTCTCCAAGTTG…	ATGCCTACCAGATTCACCAAGACCAGAAAGCACAGAGGTCACGTTTCCGCCGGTAAGGGTCGTATCGGTAAGCACAGAAAGCACCCGGGTGGTAGAGGTATGGCCGGTGGTCAGCACCACCACAGAACTAACTTGGACAAGTACCATCCAGGTTACTTCGGTAAGGTTGGTCAGAGATACTTCCACAAGCAGCAGTTGCACTTCTGGAGACCAACTTTGAACTTGGACAAGCTTTGGACTTTGGTTCCAGAGGAGAAGAGAGACCAGTACTTGGCCTCTGCCTCTGCCTCTGCTGCTCCAGTTATCGACACATTGGCTGCCGGTTACGGTAAGGTCCTCGCCAAGGGCCGTTTGCCACAGGTTCCAGTCATCGTCAAGGCTAGATTTGTCTCCAAGTTG…	OK	450	YES	CAG	Glutamine	Glutamine (CAG)
yHMPu5000037227_cyberlindnera_xishuangbannaensis_210210.g004786.m1	ATGCCTACCAGATTCACCAAGACCAGAAAGCACAGAGGTCACGTTTCCGCCGGTAACGGTCGTGTCGGTAAGCACAGAAAGCACCCGGGTGGTAGAGGTATGGCCGGTGGTCAGCACCACCACAGAACCAACTTGGATAAGTACCACCCAGGTTACTTCGGTAAGGTTGGTCAGAGATACTTCCACAAGCAGCAGTTGCACTTCTGGAGACCAACTTTGAACTTGGACAAGCTTTGGACTTTGGTTCCAGAGGAGAAGAGAGACCAGTACTTGGCTTCTGCCTCTGCCTCCGCTGCTCCAGTCATTGACACCTTGGCTGCCGGTTTCGGTAAGGTCCTCGGTAAGGGTCGTCTTCCACAGGTTCCAGTCATCGTCAAGGCCAGATTTGTCTCTAAGTTG…	ATGCCTACCAGATTCACCAAGACCAGAAAGCACAGAGGTCACGTTTCCGCCGGTAACGGTCGTGTCGGTAAGCACAGAAAGCACCCGGGTGGTAGAGGTATGGCCGGTGGTCAGCACCACCACAGAACCAACTTGGATAAGTACCACCCAGGTTACTTCGGTAAGGTTGGTCAGAGATACTTCCACAAGCAGCAGTTGCACTTCTGGAGACCAACTTTGAACTTGGACAAGCTTTGGACTTTGGTTCCAGAGGAGAAGAGAGACCAGTACTTGGCTTCTGCCTCTGCCTCCGCTGCTCCAGTCATTGACACCTTGGCTGCCGGTTTCGGTAAGGTCCTCGGTAAGGGTCGTCTTCCACAGGTTCCAGTCATCGTCAAGGCCAGATTTGTCTCTAAGTTG…	OK	450	YES	CAG	Glutamine	Glutamine (CAG)
yHMPu5000034625_pichia_kudriavzevii_180604.haplomerger2.g004447.m1	ATGCCTACCAGATTCACCAAAACTAGAAAGCACAGAGGTCACGTTTCCGCTGGTAACGGTCGTGTTGGTAAACACAGAAAGCATCCGGGTGGTAGAGGTATGGCCGGTGGTCAACATCACCACAGAACCAACTTAGATAAGTTCCACCCAGGTTACTTCGGTAAGGTTGGTATGAGATACTTCCACAAGCAAAGAAACCACTTCTGGAAGCCAGTTATTAACTTAGACAAGTTATGGTCTTTAGTTGAAAACAAGGACGAAAAGATTGCATCTTCTACCAAGGATGCAGCTGTTGTTATTGACACTTTAGCTTCCGGTTACGGTAAAGTCTTAGGTAAGGGTAGAATTCCAAACGTCCCAGTTATTGTTAAGGCTAGATACGTTTCTAAGTTAGCTGAA…	ATGCCTACCAGATTCACCAAAACTAGAAAGCACAGAGGTCACGTTTCCGCTGGTAACGGTCGTGTTGGTAAACACAGAAAGCATCCGGGTGGTAGAGGTATGGCCGGTGGTCAACATCACCACAGAACCAACTTAGATAAGTTCCACCCAGGTTACTTCGGTAAGGTTGGTATGAGATACTTCCACAAGCAAAGAAACCACTTCTGGAAGCCAGTTATTAACTTAGACAAGTTATGGTCTTTAGTTGAAAACAAGGACGAAAAGATTGCATCTTCTACCAAGGATGCAGCTGTTGTTATTGACACTTTAGCTTCCGGTTACGGTAAAGTCTTAGGTAAGGGTAGAATTCCAAACGTCCCAGTTATTGTTAAGGCTAGATACGTTTCTAAGTTAGCTGAA…	OK	444	YES	CAA	Glutamine	Glutamine (CAA)
pichia_kudriavzevii_g003295.m11	ATGCCTACCAGATTCACCAAAACTAGAAAGCACAGAGGTCACGTTTCCGCTGGTAACGGTCGTGTTGGTAAACACAGAAAGCATCCGGGTGGTAGAGGTATGGCCGGTGGTCAACATCACCACAGAACCAACTTAGATAAGTTCCACCCAGGTTACTTCGGTAAGGTTGGTATGAGATACTTCCACAAGCAAAGAAACCACTTCTGGAAGCCAGTTATTAACTTAGACAAGTTATGGTCTTTAGTTGAAAACAAGGACGAAAAGATTGCATCTTCTACCAAGGATGCAGCTGTTGTTATTGACACTTTAGCTTCCGGTTACGGTAAAGTCTTAGGTAAGGGTAGAATTCCAAACGTCCCAGTTATTGTTAAGGCTAGATACGTTTCTAAGTTAGCTGAA…	ATGCCTACCAGATTCACCAAAACTAGAAAGCACAGAGGTCACGTTTCCGCTGGTAACGGTCGTGTTGGTAAACACAGAAAGCATCCGGGTGGTAGAGGTATGGCCGGTGGTCAACATCACCACAGAACCAACTTAGATAAGTTCCACCCAGGTTACTTCGGTAAGGTTGGTATGAGATACTTCCACAAGCAAAGAAACCACTTCTGGAAGCCAGTTATTAACTTAGACAAGTTATGGTCTTTAGTTGAAAACAAGGACGAAAAGATTGCATCTTCTACCAAGGATGCAGCTGTTGTTATTGACACTTTAGCTTCCGGTTACGGTAAAGTCTTAGGTAAGGGTAGAATTCCAAACGTCCCAGTTATTGTTAAGGCTAGATACGTTTCTAAGTTAGCTGAA…	OK	444	YES	CAA	Glutamine	Glutamine (CAA)
yHMPu5000034874_tetrapisispora_blattae_190924_g001541.m1	ATGCCTACCAGATTCACAAAGACTAGAAAGCACAGAGGTCACGTCTCAGCCGGTAATGGTCGTATCGGTAAGCACAGAAAGCACCCTGGTGGTAGAGGTAGAGCCGGTGGTCAACACCACCACAGAATTAACTTGGATAAATACCATCCAGGTTACTTCGGTAAGGTCGGTATGAGATACTTCCACAAGCAAAACGCTCATTTCTGGAAGCCAGTCTTGAACTTGGACAAATTATGGACTTTAGTTCCAGAAGAAAAGAGAGATGAATACATGAAATCCTCTTCTAAATCTGCCGCCCCAGTTATTGACACTTTAGCTGCTGGTTACGGTAAGGTTTTAGGTAAGGGTAGAATTCCAAACGTCCCAGTCATCGTCAAGGCTAGATTTGTTTCCAAATTA…	ATGCCTACCAGATTCACAAAGACTAGAAAGCACAGAGGTCACGTCTCAGCCGGTAATGGTCGTATCGGTAAGCACAGAAAGCACCCTGGTGGTAGAGGTAGAGCCGGTGGTCAACACCACCACAGAATTAACTTGGATAAATACCATCCAGGTTACTTCGGTAAGGTCGGTATGAGATACTTCCACAAGCAAAACGCTCATTTCTGGAAGCCAGTCTTGAACTTGGACAAATTATGGACTTTAGTTCCAGAAGAAAAGAGAGATGAATACATGAAATCCTCTTCTAAATCTGCCGCCCCAGTTATTGACACTTTAGCTGCTGGTTACGGTAAGGTTTTAGGTAAGGGTAGAATTCCAAACGTCCCAGTCATCGTCAAGGCTAGATTTGTTTCCAAATTA…	OK	450	YES	CAA	Glutamine	Glutamine (CAA)
yHMPu5000034611_saturnispora_mendoncae_160519.haplomerger2.g001589.m1	ATGCCTACCAGATTCACAAAGACTAGAAAGCACAGAGGTCACGTCTCAGCCGGTAACGGTAGAGTTGGTAAGCACAGAAAGTCACCTGGTGGTAGAGGTAAGGCTGGTGGTCAACATCACCACAGAACCAATTTGGATAAGTTCCATCCAGGTTACTTCGGTAAGGTTGGTATGAGATACTTCCACAAGCAACAAGCTCACTTCTGGAAGCCTGTTATTAACATTGACAGTTTATGGTCATTAGTTGAAAACAAGGACGAAAAGATTGCCTCATCCACCAAGGATGCCGCTGTTGTCATTGACACCTTGGCTTCCGGTTACGGTAAGGTTTTAGGTAAGGGTAGATTGCCAAACGTTCCTGTTATCGTTAAGGCTAGATACGTCTCCAAGTTAGCTGAA…	ATGCCTACCAGATTCACAAAGACTAGAAAGCACAGAGGTCACGTCTCAGCCGGTAACGGTAGAGTTGGTAAGCACAGAAAGTCACCTGGTGGTAGAGGTAAGGCTGGTGGTCAACATCACCACAGAACCAATTTGGATAAGTTCCATCCAGGTTACTTCGGTAAGGTTGGTATGAGATACTTCCACAAGCAACAAGCTCACTTCTGGAAGCCTGTTATTAACATTGACAGTTTATGGTCATTAGTTGAAAACAAGGACGAAAAGATTGCCTCATCCACCAAGGATGCCGCTGTTGTCATTGACACCTTGGCTTCCGGTTACGGTAAGGTTTTAGGTAAGGGTAGATTGCCAAACGTTCCTGTTATCGTTAAGGCTAGATACGTCTCCAAGTTAGCTGAA…	OK	444	YES	CAA	Glutamine	Glutamine (CAA)
yHMPu5000041862_candida_golubevii_170307_g003209.m1	ATGCCTACCAGATTCACAAAGACCAGAAAGCACAGAGGTAACGTCTCTGCCGGTAAGGGTAGAGTCGGTAAGCACAGAAAGAATCCTGGTGGACGTGGTAGAGCTGGTGGTCAACACCACCACAGAACCAACTTGGACAAGTACCATCCAGGTTACTTTGGTAAGGTTGGTATGAGAACTTTCCACTACCAGAAAAACCACTACTGGAGACCAAACATCAACGTCGAGAAGTTGTGGTCGTTGATTGAGGAGGAGAAGAGAGACGAGTACCTCAAGTCTGCCTCTGCTTCTGCTGCTCCAGTCATTGACACCTTGGCCCACGGCTACGGTGTTGTTTTGGGTAAGGGTAAGATGCCTCAGGTGCCTGTCATTGTCAGAGCCAGAGTTGTGTCGAAGTTG…	ATGCCTACCAGATTCACAAAGACCAGAAAGCACAGAGGTAACGTCTCTGCCGGTAAGGGTAGAGTCGGTAAGCACAGAAAGAATCCTGGTGGACGTGGTAGAGCTGGTGGTCAACACCACCACAGAACCAACTTGGACAAGTACCATCCAGGTTACTTTGGTAAGGTTGGTATGAGAACTTTCCACTACCAGAAAAACCACTACTGGAGACCAAACATCAACGTCGAGAAGTTGTGGTCGTTGATTGAGGAGGAGAAGAGAGACGAGTACCTCAAGTCTGCCTCTGCTTCTGCTGCTCCAGTCATTGACACCTTGGCCCACGGCTACGGTGTTGTTTTGGGTAAGGGTAAGATGCCTCAGGTGCCTGTCATTGTCAGAGCCAGAGTTGTGTCGAAGTTG…	OK	450	YES	CAA	Glutamine	Glutamine (CAA)
yHMPu5000041813_metschnikowia_lunata_180604_g002595.m1	ATGCCTACCAGATTCACAAAGACCAGAAAGCACAGAGGTAACGTCTCTGCCGGTAAGGGTAGAGTCGGTAAGCACAGAAAGAACCCTGGTGGACGTGGTAGAGCTGGTGGTCAACACCACCACAGAACCAACTTGGACAAGTACCATCCAGGTTACTTTGGTAAGGTTGGTATGAGAACTTTCCACTACCAGAAAAACCACTACTGGAGACCAAATATCAACGTCGAGAAGTTGTGGTCGTTGATTGAGGAAGAGAAGAGGGACGAGTACCTCAAGTCTGCCTCTGCTTCTGCTGCTCCAGTCATTGACACCTTGGCCCACGGTTATGGTGTTGTTTTGGGTAAGGGTAAGATGCCTCAGGTGCCTGTCATTGTCAGAGCCAGAGTTGTGTCGAAGTTG…	ATGCCTACCAGATTCACAAAGACCAGAAAGCACAGAGGTAACGTCTCTGCCGGTAAGGGTAGAGTCGGTAAGCACAGAAAGAACCCTGGTGGACGTGGTAGAGCTGGTGGTCAACACCACCACAGAACCAACTTGGACAAGTACCATCCAGGTTACTTTGGTAAGGTTGGTATGAGAACTTTCCACTACCAGAAAAACCACTACTGGAGACCAAATATCAACGTCGAGAAGTTGTGGTCGTTGATTGAGGAAGAGAAGAGGGACGAGTACCTCAAGTCTGCCTCTGCTTCTGCTGCTCCAGTCATTGACACCTTGGCCCACGGTTATGGTGTTGTTTTGGGTAAGGGTAAGATGCCTCAGGTGCCTGTCATTGTCAGAGCCAGAGTTGTGTCGAAGTTG…	OK	450	YES	CAA	Glutamine	Glutamine (CAA)
yHMPu5000035313_pichia_sporocuriosa_170307.haplomerger2.g003427.m1	ATGCCTACCAGATTCACAAAAACTAGAAAGCACAGAGGTCACGTTTCCGCTGGTAACGGTCGTGTTGGTAAACACAGAAAGCACCCGGGTGGTAGAGGTATGGCCGGTGGTCAACATCACCACAGAACCAACTTAGATAAGTTCCATCCAGGTTACTTTGGTAAGGTTGGTATGAGATACTTCCACAAACAAAGAAACCACTTTTGGAAGCCAGTTATCAACTTAGACAAATTATGGTCTTTAGTTGAAAACAAGGACGAAAAAATTGCTTCTTCTTCAAAAGACGCTGCTGTTGTTATTGACACTTTAGCTTCTGGTTACGGTAAGGTCTTAGGTAAGGGTAGACTTCCACAAGTTCCAGTTATCGTTAAGGCTAGATACGTTTCCAAGTTAGCTGAA…	ATGCCTACCAGATTCACAAAAACTAGAAAGCACAGAGGTCACGTTTCCGCTGGTAACGGTCGTGTTGGTAAACACAGAAAGCACCCGGGTGGTAGAGGTATGGCCGGTGGTCAACATCACCACAGAACCAACTTAGATAAGTTCCATCCAGGTTACTTTGGTAAGGTTGGTATGAGATACTTCCACAAACAAAGAAACCACTTTTGGAAGCCAGTTATCAACTTAGACAAATTATGGTCTTTAGTTGAAAACAAGGACGAAAAAATTGCTTCTTCTTCAAAAGACGCTGCTGTTGTTATTGACACTTTAGCTTCTGGTTACGGTAAGGTCTTAGGTAAGGGTAGACTTCCACAAGTTCCAGTTATCGTTAAGGCTAGATACGTTTCCAAGTTAGCTGAA…	OK	444	YES	CAA	Glutamine	Glutamine (CAA)
yHMH617_Wickerhamomyces_sp_nov_plate34_PLATANUS.g000232.m1	ATGCCTACCAGATTCACAAAAACTAGAAAACATAGAGGTCACGTCTCAGCCGGTAACGGTCGTGTTGGTAAACACAGAAAGCATCCGGGTGGTAGAGGTAAAGCTGGTGGTCAACATCATCACAGAACTAACTTAGATAAATACCATCCAGGTTACTTTGGTAAAGTTGGTCAAAGATACTTCCACAAACAACAATTACACTTCTGGAAACCAGTTTTAAACTTGGACAAATTATGGACTTTAGTCCCAGAAGACAAAAGAGACCAATACCTAGCTTCTGCTTCCGCTACTGCTGCTCCAGTCATTGATACCTTAGCTGCTGGTTACGGTAAAGTTCTAGGTAAAGGTAGATTACCAAACGTGCCAGTCATTGTCAAAGCTAGATTTGTTTCCAAATTA…	ATGCCTACCAGATTCACAAAAACTAGAAAACATAGAGGTCACGTCTCAGCCGGTAACGGTCGTGTTGGTAAACACAGAAAGCATCCGGGTGGTAGAGGTAAAGCTGGTGGTCAACATCATCACAGAACTAACTTAGATAAATACCATCCAGGTTACTTTGGTAAAGTTGGTCAAAGATACTTCCACAAACAACAATTACACTTCTGGAAACCAGTTTTAAACTTGGACAAATTATGGACTTTAGTCCCAGAAGACAAAAGAGACCAATACCTAGCTTCTGCTTCCGCTACTGCTGCTCCAGTCATTGATACCTTAGCTGCTGGTTACGGTAAAGTTCTAGGTAAAGGTAGATTACCAAACGTGCCAGTCATTGTCAAAGCTAGATTTGTTTCCAAATTA…	OK	450	YES	CAA	Glutamine	Glutamine (CAA)
yHMPu5000038085_candida_sp_170912.g000430.m1	ATGCCTACCAGATTCACAAAAACTAGAAAACATAGAGGTCACGTCTCAGCCGGTAACGGTCGTGTTGGTAAACACAGAAAGCATCCGGGTGGTAGAGGTAAAGCTGGTGGTCAACATCATCACAGAACTAACTTAGATAAATACCATCCAGGTTACTTCGGTAAAGTTGGTCAAAGATACTTCCACAAACAACAATTACACTTCTGGAAACCAGTTTTAAACTTGGACAAATTATGGACTTTAGTCCCAGAAGACAAAAGAGACCAATACCTAGCTTCTGCTTCCGCTTCTGCTGCTCCAGTCATTGATACCTTAGCTGCTGGTTACGGTAAAGTTCTAGGTAAAGGTAGATTACCAAACGTTCCAGTTATTGTCAAAGCTAGATTTGTTTCTAAATTA…	ATGCCTACCAGATTCACAAAAACTAGAAAACATAGAGGTCACGTCTCAGCCGGTAACGGTCGTGTTGGTAAACACAGAAAGCATCCGGGTGGTAGAGGTAAAGCTGGTGGTCAACATCATCACAGAACTAACTTAGATAAATACCATCCAGGTTACTTCGGTAAAGTTGGTCAAAGATACTTCCACAAACAACAATTACACTTCTGGAAACCAGTTTTAAACTTGGACAAATTATGGACTTTAGTCCCAGAAGACAAAAGAGACCAATACCTAGCTTCTGCTTCCGCTTCTGCTGCTCCAGTCATTGATACCTTAGCTGCTGGTTACGGTAAAGTTCTAGGTAAAGGTAGATTACCAAACGTTCCAGTTATTGTCAAAGCTAGATTTGTTTCTAAATTA…	OK	450	YES	CAA	Glutamine	Glutamine (CAA)
yHAB153_kazachstania_rosinii_160519.g001248.m1	ATGCCTACCAGATTCACAAAAACCAGAAAGCACAGAGGTAACGTCTCAGCCGGTAACGGTCGTGTCGGTAAACACAGAAAGCACCCGGGTGGTAGAGGTATGGCCGGTGGTATGCAACACCACAGAATTAACATGGATAAGTACCATCCAGGTTACTTCGGTAAGATTGGTATAAAATGCTACCACAAGCAACAAGCTCACTTCTGGAAGCCAGTCTTAAACTTAGACAAGTTATGGACTTTGATTCCAGAAGAAAAGAGAGACGAATACATTAAGTCCTCTTCCAAGTCTTCTGCTCCAGTCATCGACACCTTAGCTGCCGGTTACGGTAAGGTCCTAGGTAAGGGTAGACTACCAAACGTCCCAGTCATTGTCAAGGCCAGATTCGTCTCCAGATTA…	ATGCCTACCAGATTCACAAAAACCAGAAAGCACAGAGGTAACGTCTCAGCCGGTAACGGTCGTGTCGGTAAACACAGAAAGCACCCGGGTGGTAGAGGTATGGCCGGTGGTATGCAACACCACAGAATTAACATGGATAAGTACCATCCAGGTTACTTCGGTAAGATTGGTATAAAATGCTACCACAAGCAACAAGCTCACTTCTGGAAGCCAGTCTTAAACTTAGACAAGTTATGGACTTTGATTCCAGAAGAAAAGAGAGACGAATACATTAAGTCCTCTTCCAAGTCTTCTGCTCCAGTCATCGACACCTTAGCTGCCGGTTACGGTAAGGTCCTAGGTAAGGGTAGACTACCAAACGTCCCAGTCATTGTCAAGGCCAGATTCGTCTCCAGATTA…	OK	450	YES	ATG	Methionine	Methionine (ATG)
yHMPu5000038059_Nadsonia_commutata_S169_SPADES.g000429.m1	ATGCCTACCAGATTATCCAACACTAGAAAGCACAGAGGTAACGTTTCCGCCGGTTACGGTCGTGTCGGTAAGCACAGAAAGCATCCAGGTGGTAGAGGTATGGCCGGTGGTCAACATCATCATAGAACCAATCTTGATAAGTACCATCCTGGTTACTTCGGTAAGGTCGGTATGAGATACTTCCACAAGCAAAGAAACCATTTCTGGAAGCCTGTTCTTAACCTTGATAAGCTCTGGACTCTTGTCGCCGCTGAAGACAGAGAAAAGTACTTAGCTAACACTGATGCCTCCGCTGTCCCCGTCATCGATACCCTCGCTGCCGGTTTCGGTAAGGTCCTCGGTAAGGGTCGTCTTCCCAACGTCCCCGTCATCGTTAAGGCCAGATTCGTTTCCAAGCTT…	ATGCCTACCAGATTATCCAACACTAGAAAGCACAGAGGTAACGTTTCCGCCGGTTACGGTCGTGTCGGTAAGCACAGAAAGCATCCAGGTGGTAGAGGTATGGCCGGTGGTCAACATCATCATAGAACCAATCTTGATAAGTACCATCCTGGTTACTTCGGTAAGGTCGGTATGAGATACTTCCACAAGCAAAGAAACCATTTCTGGAAGCCTGTTCTTAACCTTGATAAGCTCTGGACTCTTGTCGCCGCTGAAGACAGAGAAAAGTACTTAGCTAACACTGATGCCTCCGCTGTCCCCGTCATCGATACCCTCGCTGCCGGTTTCGGTAAGGTCCTCGGTAAGGGTCGTCTTCCCAACGTCCCCGTCATCGTTAAGGCCAGATTCGTTTCCAAGCTT…	OK	450	YES	CAA	Glutamine	Glutamine (CAA)
yHMPu5000034975_dekkera_bruxellensis_160519.haplomerger2.g004779.m1	ATGCCTACCAGATTACGTCAAACTAGAAAGCACAGGGGAAACGTTACAGCCGGTTACGGTCGTATCGGAAAGCACAGAAAGCACCCAGGTGGACGTGGTATGGCCGGTGGTCAGCATCACCACAGAATTGCCATGGATAAGTACCATCCAGGTTACTTCGGTAAAGTTGGTATGAGATTCTTCCACAAGCAAAAGAACCCATTCTGGAAGCCAGTTATCAATTTAGAAAAGCTATGGTCTTTGGTTGACAACAAGGACGAGAAGTTGGCTCAGTCCACTAAGGACTCTGCTGTCGTTATTGACACTTTGGCTCACGGTTACGGTAAGGTCTTGGGTAAGGGAAGACTTCCTAATGTTCCAGTTATCGTTAAGGCCAGATTTGTCTCAAAGTTGGCTGAG…	ATGCCTACCAGATTACGTCAAACTAGAAAGCACAGGGGAAACGTTACAGCCGGTTACGGTCGTATCGGAAAGCACAGAAAGCACCCAGGTGGACGTGGTATGGCCGGTGGTCAGCATCACCACAGAATTGCCATGGATAAGTACCATCCAGGTTACTTCGGTAAAGTTGGTATGAGATTCTTCCACAAGCAAAAGAACCCATTCTGGAAGCCAGTTATCAATTTAGAAAAGCTATGGTCTTTGGTTGACAACAAGGACGAGAAGTTGGCTCAGTCCACTAAGGACTCTGCTGTCGTTATTGACACTTTGGCTCACGGTTACGGTAAGGTCTTGGGTAAGGGAAGACTTCCTAATGTTCCAGTTATCGTTAAGGCCAGATTTGTCTCAAAGTTGGCTGAG…	OK	444	YES	CAG	Glutamine	Glutamine (CAG)
brettanomyces_anomalus_g002226.m1	ATGCCTACCAGATTACGTCAAACTAGAAAGCACAGGGGAAACGTTACAGCCGGTTACGGTCGTATCGGAAAGCACAGAAAGCACCCAGGTGGACGTGGTATGGCCGGTGGTCAGCATCACCACAGAATTGCCATGGATAAATACCATCCAGGTTACTTCGGTAAGGTTGGTATGAGATTCTTCCACAAGCAAAAGAACCCATTCTGGAGGCCAGTTATCAATTTGGAGAAGCTATGGTCTTTGGTTGACAACAAGGACGAGAAGTTGGCTCAGTCCACTAAGGACTCCGCTGTCGTTATCGACACTTTGGCTCATGGTTACGGTAAGGTTTTGGGTAAGGGAAGACTTCCTGATGTCCCAGTTATCGTTAAGGCCAGATTCGTCTCAAAGTTGGCTGAG…	ATGCCTACCAGATTACGTCAAACTAGAAAGCACAGGGGAAACGTTACAGCCGGTTACGGTCGTATCGGAAAGCACAGAAAGCACCCAGGTGGACGTGGTATGGCCGGTGGTCAGCATCACCACAGAATTGCCATGGATAAATACCATCCAGGTTACTTCGGTAAGGTTGGTATGAGATTCTTCCACAAGCAAAAGAACCCATTCTGGAGGCCAGTTATCAATTTGGAGAAGCTATGGTCTTTGGTTGACAACAAGGACGAGAAGTTGGCTCAGTCCACTAAGGACTCCGCTGTCGTTATCGACACTTTGGCTCATGGTTACGGTAAGGTTTTGGGTAAGGGAAGACTTCCTGATGTCCCAGTTATCGTTAAGGCCAGATTCGTCTCAAAGTTGGCTGAG…	OK	444	YES	CAG	Glutamine	Glutamine (CAG)
yHMPu5000034976_dekkera_anomala_160519.haplomerger2_g003674.m1	ATGCCTACCAGATTACGTCAAACTAGAAAGCACAGGGGAAACGTTACAGCCGGTTACGGTCGTATCGGAAAGCACAGAAAGCACCCAGGTGGACGTGGTATGGCCGGTGGTCAGCATCACCACAGAATTGCCATGGATAAATACCATCCAGGTTACTTCGGTAAGGTTGGTATGAGATTCTTCCACAAGCAAAAGAACCCATTCTGGAGGCCAGTTATCAATTTGGAGAAGCTATGGTCTTTGGTTGACAACAAGGACGAGAAGTTGGCTCAGTCCACTAAGGACTCCGCTGTCGTTATCGACACTTTGGCTCATGGTTACGGTAAGGTTTTGGGTAAGGGAAGACTTCCTGATGTCCCAGTTATCGTTAAGGCCAGATTCGTCTCAAAGTTGGCTGAG…	ATGCCTACCAGATTACGTCAAACTAGAAAGCACAGGGGAAACGTTACAGCCGGTTACGGTCGTATCGGAAAGCACAGAAAGCACCCAGGTGGACGTGGTATGGCCGGTGGTCAGCATCACCACAGAATTGCCATGGATAAATACCATCCAGGTTACTTCGGTAAGGTTGGTATGAGATTCTTCCACAAGCAAAAGAACCCATTCTGGAGGCCAGTTATCAATTTGGAGAAGCTATGGTCTTTGGTTGACAACAAGGACGAGAAGTTGGCTCAGTCCACTAAGGACTCCGCTGTCGTTATCGACACTTTGGCTCATGGTTACGGTAAGGTTTTGGGTAAGGGAAGACTTCCTGATGTCCCAGTTATCGTTAAGGCCAGATTCGTCTCAAAGTTGGCTGAG…	OK	444	YES	CAG	Glutamine	Glutamine (CAG)
yHMPu5000034627_pichia_heedii_180604.g002841.m1	ATGCCTACCAGATTACATAAAACTAGAAAGCATAGAGGTAACGTTTGTGCCGGTAAAGGTAGAGTTGGTAAACACAGAAAGCATCCTGGTGGTAGAGGTATGGCCGGTGGTCAACATCACCACAGAACTAACTTAGATAAATATCATCCAGGTTATTTCGGTAAAGTTGGTATGAGATACTATCATAAACAAAATGCACACTTCTGGAGACCAGTTATCAATTTAGATAAATTATGGTCATTAGTTGAAAATAAAGATGAAAAAATTGCATCTTCTACTAAAGATGCTGCAATTGTTATCGATACTTTAGCTTCAGGTTACGGTAAAGTTTTAGGTAAAGGTAGACTTCCAGATGTTCCTGTTATTGTTAAGGCTAGATACGTTTCTAAATTAGCTGAA…	ATGCCTACCAGATTACATAAAACTAGAAAGCATAGAGGTAACGTTTGTGCCGGTAAAGGTAGAGTTGGTAAACACAGAAAGCATCCTGGTGGTAGAGGTATGGCCGGTGGTCAACATCACCACAGAACTAACTTAGATAAATATCATCCAGGTTATTTCGGTAAAGTTGGTATGAGATACTATCATAAACAAAATGCACACTTCTGGAGACCAGTTATCAATTTAGATAAATTATGGTCATTAGTTGAAAATAAAGATGAAAAAATTGCATCTTCTACTAAAGATGCTGCAATTGTTATCGATACTTTAGCTTCAGGTTACGGTAAAGTTTTAGGTAAAGGTAGACTTCCAGATGTTCCTGTTATTGTTAAGGCTAGATACGTTTCTAAATTAGCTGAA…	OK	444	YES	CAA	Glutamine	Glutamine (CAA)
yHMPu5000034906_candida_succiphila_160519.g004337.m1	ATGCCTACCAGATTACACAAGACAAGAAAGCACAGAGGTCACACAGTTGCCGGTAAAGGTCGTGTCGGTAAGCACAGAAAGCATCCTGGTGGTAGAGGTAAGGCCGGTGGTCAACACCATCACAGAACTAACTTGGATAAATACCATCCAGGTTACTTCGGTAAGGTCGGTCAAAGATACTTCCACAAGCAACAAGGCCACTTCTGGAGACCAGTCATCAACTTGGACAAATTGTGGTCCCTCGTTGAAGACAAAGATGAAAAAATCAATGCTTCCTCTAAAGATGCCGCTGTTGTCATTGACACCTTAGCTGGCGGTTACGGTAAAGTTTTGGGTAAAGGTAGACTTCCTGAAGTCCCAGTCATCGTCAAGGCCAGATACGTTTCCAAGTTGGCTGAA…	ATGCCTACCAGATTACACAAGACAAGAAAGCACAGAGGTCACACAGTTGCCGGTAAAGGTCGTGTCGGTAAGCACAGAAAGCATCCTGGTGGTAGAGGTAAGGCCGGTGGTCAACACCATCACAGAACTAACTTGGATAAATACCATCCAGGTTACTTCGGTAAGGTCGGTCAAAGATACTTCCACAAGCAACAAGGCCACTTCTGGAGACCAGTCATCAACTTGGACAAATTGTGGTCCCTCGTTGAAGACAAAGATGAAAAAATCAATGCTTCCTCTAAAGATGCCGCTGTTGTCATTGACACCTTAGCTGGCGGTTACGGTAAAGTTTTGGGTAAAGGTAGACTTCCTGAAGTCCCAGTCATCGTCAAGGCCAGATACGTTTCCAAGTTGGCTGAA…	OK	444	YES	CAA	Glutamine	Glutamine (CAA)
yHMPu5000034624_pichia_nakasei_180604.g006142.m1	ATGCCTACCAGATTACACAAAACTAGAAAGCATAGAGGTAACGTTTGTGCCGGTAAAGGTAGAGTTGGTAAGCACAGAAAGCATCCCGGTGGTAGAGGTATGGCCGGTGGTCAACACCACCACAGAACTAACTTAGATAAATACCATCCAGGTTATTTCGGTAAAGTTGGTATGAGATACTACCACAAGCAAAATGCACATTTCTGGAAACCAGTTATCAACTTAGACAAATTATGGTCATTAGTTGAAAACAAGGATGAAAAGATTGCTTCATCTACCAAGGATGCTGCTATTGTCATTGATACTTTAGCTTCAGGTTACGGTAAGGTTTTAGGTAAGGGTAGACTTCCAGATGTTCCAGTTATCGTTAAGGCTAGATACGTCTCCAAGTTAGCTGAA…	ATGCCTACCAGATTACACAAAACTAGAAAGCATAGAGGTAACGTTTGTGCCGGTAAAGGTAGAGTTGGTAAGCACAGAAAGCATCCCGGTGGTAGAGGTATGGCCGGTGGTCAACACCACCACAGAACTAACTTAGATAAATACCATCCAGGTTATTTCGGTAAAGTTGGTATGAGATACTACCACAAGCAAAATGCACATTTCTGGAAACCAGTTATCAACTTAGACAAATTATGGTCATTAGTTGAAAACAAGGATGAAAAGATTGCTTCATCTACCAAGGATGCTGCTATTGTCATTGATACTTTAGCTTCAGGTTACGGTAAGGTTTTAGGTAAGGGTAGACTTCCAGATGTTCCAGTTATCGTTAAGGCTAGATACGTCTCCAAGTTAGCTGAA…	OK	444	YES	CAA	Glutamine	Glutamine (CAA)
yHMPu5000034626_pichia_kluyveri_170307.haplomerger2.g003864.m1	ATGCCTACCAGATTACACAAAACTAGAAAGCATAGAGGTAACGTTTGTGCCGGTAAAGGTAGAGTTGGTAAACACAGAAAGCATCCCGGTGGTAGAGGTATGGCCGGTGGTCAACACCACCACAGAACTAACTTAGATAAATATCATCCAGGTTATTTCGGTAAAGTTGGTATGAGATATTACCATAAACAAAATGCACATTTCTGGAAACCAGTTATTAACTTAGACAAATTATGGTCATTAGTTGAAAACAAGGATGAAAAAATTGCATCATCAACTAAAGATGCAGCTATTGTTATTGATACTTTAGCTTCAGGTTACGGTAAAGTTTTAGGTAAGGGTAGACTTCCAGATGTTCCAGTTATTGTTAAAGCTAGATACGTTTCAAAATTAGCTGAA…	ATGCCTACCAGATTACACAAAACTAGAAAGCATAGAGGTAACGTTTGTGCCGGTAAAGGTAGAGTTGGTAAACACAGAAAGCATCCCGGTGGTAGAGGTATGGCCGGTGGTCAACACCACCACAGAACTAACTTAGATAAATATCATCCAGGTTATTTCGGTAAAGTTGGTATGAGATATTACCATAAACAAAATGCACATTTCTGGAAACCAGTTATTAACTTAGACAAATTATGGTCATTAGTTGAAAACAAGGATGAAAAAATTGCATCATCAACTAAAGATGCAGCTATTGTTATTGATACTTTAGCTTCAGGTTACGGTAAAGTTTTAGGTAAGGGTAGACTTCCAGATGTTCCAGTTATTGTTAAAGCTAGATACGTTTCAAAATTAGCTGAA…	OK	444	YES	CAA	Glutamine	Glutamine (CAA)
yHMPu5000037847_pichia_cephalocereana_201018.g004728.m1	ATGCCTACCAGATTACACAAAACTAGAAAGCATAGAGGTAACGTTTGTGCCGGTAAAGGTAGAGTTGGTAAACACAGAAAGCATCCCGGTGGTAGAGGTATGGCCGGTGGTCAACACCACCACAGAACTAACTTAGATAAATACCATCCAGGTTATTTCGGTAAAGTTGGTATGAGATATTACCATAAACAAAATGCACATTTCTGGAAACCAGTTATTAACTTAGACAAATTATGGTCATTAGTTGAAAACAAGGATGAAAAAATTGCATCATCAACTAAAGATGCAGCTATTGTTATTGATACTTTAGCTTCAGGTTACGGTAAAGTTTTAGGTAAGGGTAGACTTCCAGATGTTCCAGTTATTGTTAAAGCTAGATACGTTTCAAAATTAGCTGAA…	ATGCCTACCAGATTACACAAAACTAGAAAGCATAGAGGTAACGTTTGTGCCGGTAAAGGTAGAGTTGGTAAACACAGAAAGCATCCCGGTGGTAGAGGTATGGCCGGTGGTCAACACCACCACAGAACTAACTTAGATAAATACCATCCAGGTTATTTCGGTAAAGTTGGTATGAGATATTACCATAAACAAAATGCACATTTCTGGAAACCAGTTATTAACTTAGACAAATTATGGTCATTAGTTGAAAACAAGGATGAAAAAATTGCATCATCAACTAAAGATGCAGCTATTGTTATTGATACTTTAGCTTCAGGTTACGGTAAAGTTTTAGGTAAGGGTAGACTTCCAGATGTTCCAGTTATTGTTAAAGCTAGATACGTTTCAAAATTAGCTGAA…	OK	444	YES	CAA	Glutamine	Glutamine (CAA)
yHMPu5000034641_pichia_eremophila_170307.haplomerger2.g003788.m1	ATGCCTACCAGATTACACAAAACTAGAAAGCATAGAGGTAACGTTTGTGCCGGTAAAGGTAGAGTTGGTAAACACAGAAAGCATCCCGGTGGTAGAGGTATGGCCGGTGGTCAACACCACCACAGAACTAACTTAGATAAATACCATCCAGGTTATTTCGGTAAAGTTGGTATGAGATACTACCATAAACAAAATGCACATTTCTGGAAACCAGTTATTAACTTAGACAAATTATGGTCATTAGTTGAAAACAAGGATGAAAAAATTGCATCATCAACTAAAGATGCAGCTATTGTTATTGATACTTTAGCTTCAGGTTACGGTAAAGTTTTAGGTAAGGGTAGACTTCCAGATGTTCCAGTTATTGTTAAAGCTAGATACGTTTCAAAATTAGCTGAA…	ATGCCTACCAGATTACACAAAACTAGAAAGCATAGAGGTAACGTTTGTGCCGGTAAAGGTAGAGTTGGTAAACACAGAAAGCATCCCGGTGGTAGAGGTATGGCCGGTGGTCAACACCACCACAGAACTAACTTAGATAAATACCATCCAGGTTATTTCGGTAAAGTTGGTATGAGATACTACCATAAACAAAATGCACATTTCTGGAAACCAGTTATTAACTTAGACAAATTATGGTCATTAGTTGAAAACAAGGATGAAAAAATTGCATCATCAACTAAAGATGCAGCTATTGTTATTGATACTTTAGCTTCAGGTTACGGTAAAGTTTTAGGTAAGGGTAGACTTCCAGATGTTCCAGTTATTGTTAAAGCTAGATACGTTTCAAAATTAGCTGAA…	OK	444	YES	CAA	Glutamine	Glutamine (CAA)
[truncated: 757 more rows]

## Sheet: Sheet1 (2)
ID	NA_sequence	Clean Sequence	ATG Check	Length_Check	Has 38th Codon	Extract_38th Codon	CategoryLabel 38th Codon	Category Label defined	NON ACGT character?	Length multiple of 3
[truncated: 1,197 more rows]

## Sheet: Sheet4
ID			NA_sequence	Column1	Column2
[truncated: 50 more rows]

## Sheet: uL15_FINAL
ID	NA_sequence	Search sequence: GC?GG?GG?	length	ACGT Sanity Check	Identify 3 bases following motif	Amino Acid Name				Amino Acid	CAG	CAA	GAC	GAT	GAA	GAG	TTC	TTT	CTC	CTG	CTT	CTA	TTA	TTG	AAC	AAT	ATG		GCA	GCG	GCC	GCT
[truncated: 1,197 more rows]
