# Supplementary material
Source: Research Square preprint supplement (doi:10.21203/rs.3.rs-9313202/v1)
Supplement: Supplementary file 4 [file d088a2046df22a5ee780f084.docx]

**Table 1 - Alaninales**

| **eL42** | **uL15** | **Cycl** | **n** | **Species** |
| --- | --- | --- | --- | --- |
| P56Q | Q | + | 9 | *Nakazawaea molendinolei*; *Nakazawaea populi*; *Nakazawaea ernobii*; *Nakazawaea wyomingensis*; *Nakazawaea wickerhamii*; *Nakazawaea pomicola*; *Nakazawaea peltata*; *Nakazawaea ishiwadae*; *Nakazawaea holstii* |
| P56Q | Q | −/+ | 2 | *Nakazawaea siamensis*; *Nakazawaea anatomiae* |
| P | Q | − | 3 | *Pachysolen tannophilus*; *Peterozyma toletana*; *Peterozyma xylosa* |

*Cycl, combined cycloheximide phenotype from 0.1% and 0.01% cycloheximide assays; n, number of species represented in each grouped row.*

**Table 2 Ascoideales**

| **eL42** | **uL15** | **Cycl** | **n** | **Species** |
| --- | --- | --- | --- | --- |
| P56Q | Q | + | 11 | *Saccharomycopsis javanensis*; *Saccharomycopsis guyanensis*; *Saccharomycopsis olivae*; *Saccharomycopsis oosterbeekiorum*; *Saccharomycopsis amapae*; *Saccharomycopsis fermentans*; *Saccharomycopsis schoenii*; *Saccharomycopsis crataegensis*; *Saccharomycopsis fodiens*; *Saccharomycopsis babjevae*; *Saccharomycopsis capsularis* |
| P56Q | Q | −/+ | 1 | *Saccharomycopsis lassenensis* |
| P56Q | Q | delayed | 1 | *Saccharomycopsis selenospora* |

*Cycl, combined cycloheximide phenotype from 0.1% and 0.01% cycloheximide assays; n, number of species represented in each grouped row.*

**Table 3 Dipodascales**

| **eL42** | **uL15** | **Cycl** | **n** | **Species** |
| --- | --- | --- | --- | --- |
| P56Q/P56Q | Q | + | 5 | *Dipodascus siamensis*; *Dipodascus histeridarus*; *Dipodascus ghanensis*; *Geotrichum cucujoidarum*; *Dipodascus carabidarus* |
| P56Q/P56Q | Q | − | 1 | *Geotrichum phurueaensis* |
| P56Q | Q | + | 64 | *Blastobotrys americanus*; *Blastobotrys muscicola*; *Blastobotrys peoriensis*; *Sugiyamaella americana*; *Sugiyamaella boreocaroliniensis*; *Sugiyamaella japonica*; *Wickerhamiella parazyma*; *Sugiyamaella marilandica*; *Sugiyamaella floridensis*; *Sugiyamaella lignohabitans*; *Sugiyamaella pinicola*; *Trichomonascus vanleenenianus*; *Wickerhamiella lipophila*; *Blastobotrys illinoisensis*; *Blastobotrys chiropterorum*; *Blastobotrys malaysiensis*; *Sugiyamaella neomexicana*; *Candida tunisiensis*; *Spencermartinsiella ligniputridi*; *Sugiyamaella castrensis*; *Sugiyamaella chiloensis*; *Sugiyamaella novakii*; *Starmerella ratchasimensis*; *Wickerhamiella azymoides*; *Wickerhamiella sorbophila*; *Candida blankii*; *Groenewaldozyma salmanticensis*; *Middelhovenomyces tepae*; *Yarrowia porcina*; *Yarrowia lipolytica*; *Yarrowia keelungensis*; *Yarrowia deformans*; *Yarrowia bubula*; *Yarrowia galli*; *Yarrowia hollandica*; *Yarrowia phangngaensis*; *Groenewaldozyma auringiensis*; *Groenewaldozyma tartarivorans*; *Wickerhamiella occidentalis*; *Wickerhamiella vanderwaltii*; *Candida incommunis*; *Trichomonascus apis*; *Blastobotrys adeninivorans*; *Blastobotrys mokoenaii*; *Blastobotrys parvus*; *Blastobotrys raffinosifermentans*; *Blastobotrys robertii*; *Wickerhamiella cacticola*; *Spencermartinsiella europaea*; *Wickerhamiella australiensis*; *Starmerella floris*; *Sugiyamaella grinbergsii*; *Sugiyamaella paludigena*; *Sugiyamaella smithiae*; *Sugiyamaella valdiviana*; *Starmerella khaoyaiensis*; *Starmerella scarabaei*; *Yarrowia brassicae*; *Yarrowia alimentaria*; *Yarrowia osloensis*; *Deakozyma indianensis*; *Wickerhamiella nectarea*; *Diddensiella caesifluorescens*; *Diddensiella santjacobensis* |
| P56Q | Q | − | 3 | *Sugiyamaella marionensis*; *Wickerhamiella siamensis*; *Blastobotrys persicus* |
| P56Q | Q38F | + | 1 | *Candida kazuoi* |
| P56Q | Q38L | + | 1 | *Candida patagonica* |
| P56E | Q | − | 1 | *Starmerella davenportii* |
| P (2) | Q | − | 2 | *Nadsonia starkeyi-henricii*; *Nadsonia fulvescens var. fulvescens* |
| P | Q | + | 2 | *Starmerella apicola*; *Starmerella magnoliae* |
| P | Q | − | 25 | *Starmerella lactis-condensi*; *Wickerhamiella allomyrinae*; *Starmerella asiatica*; *Starmerella vitae*; *Starmerella roubikii*; *Wickerhamiella kurtzmanii*; *Wickerhamiella domercqiae*; *Starmerella stellata*; *Starmerella floricola*; *Starmerella etchellsii*; *Starmerella bombi*; *Wickerhamiella galacta*; *Starmerella powellii*; *Starmerella sirachaensis*; *Wickerhamiella pararugosa*; *Candida spandovensis*; *Starmerella apis*; *Starmerella gropengiesseri*; *Starmerella geochares*; *Starmerella tilneyi*; *Wickerhamiella brachini*; *Wickerhamiella hasegawae*; *Starmerella bombicola*; *Starmerella vaccinii*; *Wickerhamiella bombiphila* |
| P | Q38M | + | 5 | *Zygoascus biomembranicola*; *Wickerhamiella qilinensis*; *Zygoascus meyerae*; *Zygoascus tannicola*; *Zygoascus hellenicus* |
| P | Q38L | + | 1 | *Crinitomyces ghanaensis* |
| P | Q | −/+ | 3 | *Starmerella bacillaris*; *Wickerhamiella versatilis*; *Starmerella potacharoeniae* |
| N/A | Q | − | 1 | *Nadsonia commutata* |

*Cycl, combined cycloheximide phenotype from 0.1% and 0.01% cycloheximide assays; n, number of species represented in each grouped row.*

**Table 4 Lipomycetales**

| **eL42** | **uL15** | **Cycl** | **n** | **Species** |
| --- | --- | --- | --- | --- |
| P56Q | Q38M | + | 5 | *Lipomyces arxii*; *Lipomyces oligophaga*; *Limtongia smithiae*; *Myxozyma monticola*; *Myxozyma kluyveri* |
| P56Q | Q38A | − | 1 | *Myxozyma udenii* |
| P56Q | Q38A | + | 8 | *Lipomyces spencermartinsiae*; *Lipomyces kononenkoae*; *Lipomyces sp.*; *Lipomyces kockii*; *Lipomyces chichibuensis*; *Lipomyces yamadae*; *Lipomyces yarrowii*; *Myxozyma lipomycoides* |
| P56Q | Q | + | 9 | *Lipomyces lipofer*; *Lipomyces japonicus*; *Kockiozyma suomiensis*; *Lipomyces tetrasporus*; *Myxozyma melibiosi*; *Myxozyma geophila*; *Myxozyma mucilagina*; *Lipomyces yamanashiensis*; *Lipomyces orientalis* |
| P56Q | Q | − | 1 | *Badjevia anomala* |

*Cycl, combined cycloheximide phenotype from 0.1% and 0.01% cycloheximide assays; n, number of species represented in each grouped row.*

**Table 5 Phaffomycetales**

| **eL42** | **uL15** | **Cycl** | **n** | **Species** |
| --- | --- | --- | --- | --- |
| P56Q | Q | + | 4 | *Cyberlindnera maclurae*; *Cyberlindnera misumaiensis*; *Starmera dryadoides*; *Candida dendrica* |
| P (2) | Q | − | 2 | *Wickerhamomyces ciferrii*; *Wickerhamomyces lynferdii* |
| P | Q | − | 84 | *Candida ficus*; *Cyberlindnera rhodanensis*; *Cyberlindnera veronae*; *Wickerhamomyces chaumierensis*; *Candida coquimbonensis*; *Candida adriatica*; *Candida ulmi*; *Cyberlindnera bimundalis*; *Wickerhamomyces mucosus*; *Candida odintsovae*; *Candida quercuum*; *Cyberlindnera euphorbiiphila*; *Starmera caribaea*; *Cyberlindnera galapagoensis*; *Cyberlindnera xishuangbannaensis*; *Cyberlindnera americana*; *Cyberlindnera fabianii*; *Cyberlindnera japonica*; *Cyberlindnera meyerae*; *Candida vartiovaarae*; *Cyberlindnera xylosilytica*; *Cyberlindnera suaveolens*; *Cyberlindnera saturnus*; *Phaffomyces opuntiae*; *Starmera amethionina*; *Wickerhamomyces canadensis*; *Cyberlindnera jadinii*; *Cyberlindnera petersonii*; *Cyberlindnera subsufficiens*; *Wickerhamomyces alni*; *Wickerhamomyces anomalus*; *Wickerhamomyces bisporus*; *Wickerhamomyces bovis*; *Wickerhamomyces chambardii*; *Wickerhamomyces hampshirensis*; *Wickerhamomyces onychis*; *Candida solani*; *Candida silvicultrix*; *Wickerhamomyces sydowiorum*; *Wickerhamomyces subpelliculosus*; *Wickerhamomyces strasburgensis*; *Wickerhamomyces rabaulensis*; *Wickerhamomyces pijperi*; *Barnettozyma wickerhamii*; *Barnettozyma salicaria*; *Barnettozyma pratensis*; *Barnettozyma populi*; *Barnettozyma hawaiiensis*; *Barnettozyma californica*; *Cyberlindnera euphorbiae*; *Cyberlindnera lachancei*; *Cyberlindnera mrakii*; *Cyberlindnera maritima*; *Candida norvegica*; *Starmera pachycereana*; *Starmera stellimalicola*; *Starmera quercuum*; *Wickerhamomyces silvicola*; *Candida galis*; *Candida dajiaensis*; *Candida jianshihensis*; *Candida qinlingensis*; *Candida sanyiensis*; *Candida yuanshanica*; *Candida hungchunana*; *Candida maesae*; *Candida stauntonica*; *Candida takata*; *Candida taoyuanica*; *Wickerhamomyces xylosica*; *Cyberlindnera amylophila*; *Cyberlindnera mycetangii*; *Phaffomyces thermotolerans*; *Phaffomyces antillensis*; *Cyberlindnera mississippiensis*; *Candida ponderosae*; *Candida peoriensis*; *Candida montana*; *Cyberlindnera sargentensis*; *Candida namnaoensis*; *Wickerhamomyces tratensis*; *Cyberlindnera samutprakarnensis*; *Cyberlindnera nakhonratchasimensis*; *Candida easanensis* |

*Cycl, combined cycloheximide phenotype from 0.1% and 0.01% cycloheximide assays; n, number of species represented in each grouped row.*

**Table 6 Pichiales**

| **eL42** | **uL15** | **Cycl** | **n** | **Species** |
| --- | --- | --- | --- | --- |
| P56Q | Q | weak | 2 | *Candida pini*; *Ogataea pini* |
| P56Q | Q | − | 3 | *Ogataea henricii*; *Candida mattraenensis*; *Ambrosiozyma monospora* |
| P56Q | Q | + | 59 | *Candida ortonii*; *Ogataea degrootiae*; *Candida xyloterini*; *Brettanomyces bruxellensis*; *Ambrosiozyma angophorae*; *Candida nitratophila*; *Candida succiphila*; *Ogataea kodamae*; *Ogataea glucozyma*; *Ogataea zsoltii*; *Candida methanosorbosa*; *Candida krabiensis*; *Ogataea polymorpha*; *Candida ovalis*; *Candida sithepensis*; *Ogataea allantospora*; *Ogataea siamensis*; *Ambrosiozyma llanquihuensis*; *Ambrosiozyma kashinagicola*; *Brettanomyces anomalus*; *Brettanomyces naardenensis*; *Komagataella pastoris*; *Ambrosiozyma platypodis*; *Ambrosiozyma philentoma*; *Ambrosiozyma oregonensis*; *Kuraishia cidri*; *Kuraishia floccosa*; *Candida nanaspora*; *Candida boidinii*; *Candida arabinofermentans*; *Candida nemodendra*; *Candida sonorensis*; *Ogataea nonfermentans*; *Ogataea naganishii*; *Ogataea methanolica*; *Ogataea dorogensis*; *Ogataea angusta*; *Ogataea philodendri*; *Ogataea pilisensis*; *Ogataea ramenticola*; *Ogataea salicorniae*; *Ogataea trehalophila*; *Ogataea wickerhamii*; *Ogataea populi-albae*; *Candida pignaliae*; *Ambrosiozyma vanderkliftii*; *Ambrosiozyma ambrosiae*; *Ogataea saltuana*; *Ogataea thermomethanolica*; *Ogataea chonburiensis*; *Candida rishiriensis*; *Ogataea paraovalis*; *Ogataea haglerorum*; *Komagataella mondaviorum*; *Pichia nanzhaoensis*; *Komagataella kurtzmanii*; *Ogataea nitratoaversa*; *Ogataea parapolymorpha (2)* |
| P56Q | Q | −/+ | 6 | *Komagataella phaffii*; *Candida maris*; *Candida piceae*; *Ogataea methylivora*; *Ogataea methylovora*; *Brettanomyces nanus* |
| P56Q | Q38L | + | 1 | *Ogataea minuta* |
| P56Q | Q38M | + | 1 | *Kuraishia ogatae* |
| P | Q | − | 50 | *Candida silvatica*; *Saturnispora halmiae*; *Candida awuae*; *Pichia cactophila*; *Candida pseudolambica*; *Candida thaimueangensis*; *Pichia insulana*; *Candida sorboxylosa*; *Saturnispora ahearnii*; *Pichia gijzenarium*; *Saturnispora galanensis*; *Pichia paraexigua*; *Kregervanrija fluxuum*; *Kregervanrija delftensis*; *Pichia membranifaciens*; *Saturnispora dispora*; *Candida insectalens*; *Pichia scutulata*; *Pichia terricola*; *Candida californica*; *Saturnispora diversa*; *Martiniozyma abietophila*; *Pichia exigua*; *Pichia fermentans*; *Pichia heedii*; *Pichia kluyveri*; *Pichia kudriavzevii*; *Pichia nakasei*; *Pichia norvegensis*; *Candida ethanolica*; *Candida rugopelliculosa*; *Saturnispora zaruensis*; *Saturnispora silvae*; *Saturnispora serradocipensis*; *Saturnispora saitoi*; *Saturnispora mendoncae*; *Saturnispora gosingensis*; *Pichia pseudocactophila*; *Citeromyces nyonsensis*; *Ambrosiozyma pseudovanderkliftii*; *Saturnispora sekii*; *Saturnispora sanitii*; *Saturnispora quitensis*; *Pichia cephalocereana*; *Saturnispora kantuleensis*; *Pichia sporocuriosa*; *Pichia eremophila*; *Pichia deserticola*; *Saturnispora hagleri*; *Citeromyces matritensis* |
| P | Q | + | 1 | *Candida phayaonensis* |
| P | Q | −/+ | 1 | *Martiniozyma asiatica* |
| N/A | Q | − | 1 | *Candida inconspicua* |
| P | Q38L | weak | 1 | *Kuraishia capsulata* |

*Cycl, combined cycloheximide phenotype from 0.1% and 0.01% cycloheximide assays; n, number of species represented in each grouped row.*

**Table 7 Saccharomycetales**

| **eL42** | **uL15** | **Cycl** | **n** | **Species** |
| --- | --- | --- | --- | --- |
| P56Q | Q | + | 6 | *Lachancea dasiensis*; *Lachancea fermentati*; *Lachancea waltii*; *Kazachstania servazzii*; *Kazachstania siamensis*; *Kazachstania unispora* |
| P56Q | Q38F | + | 3 | *Zygotorulaspora chibaensis*; *Zygotorulaspora florentina*; *Zygotorulaspora mrakii* |
| P56Q | Q38F | − | 1 | *Zygotorulaspora danielsina* |
| P56Q | Q38L | + | 5 | *Kluyveromyces lactis var. lactis*; *Kluyveromyces wickerhamii*; *Kluyveromyces lactis var. drosophilarum*; *Kluyveromyces dobzhanskii*; *Lachancea cidri* |
| P56Q | Q38L 5 copies | + | 1 | *Kluyveromyces marxianus* |
| P56Q | Q38M | + | 1 | *Vanderwaltozyma verrucispora* |
| P56Q | Q38M | − | 1 | *Eremothecium sinecaudum* |
| P | Q | − | 58 | *Grigorovia transvaalensis*; *Zygosaccharomyces bailii*; *Lachancea quebecensis*; *Zygosaccharomyces parabailii*; *Kazachstania jinghongensis*; *Nakaseomyces bacillisporus*; *Torulaspora delbrueckii*; *Torulaspora microellipsoides*; *Zygosaccharomyces pseudobailii*; *Torulaspora pretoriensis*; *Tetrapisispora blattae*; *Vanderwaltozyma polyspora*; *Zygosaccharomyces bisporus*; *Zygosaccharomyces lentus*; *Zygosaccharomyces rouxii*; *Nakaseomyces castellii*; *Nakaseomyces glabratus*; *Kluyveromyces aestuarii (2)*; *Lachancea kluyveri*; *Lachancea nothofagi*; *Lachancea thermotolerans*; *Torulaspora franciscae*; *Nakaseomyces delphensis*; *Kazachstania sinensis*; *Kazachstania viticola*; *Kazachstania spencerorum*; *Kazachstania martiniae*; *Kazachstania telluris*; *Kazachstania pintolopesii*; *Kazachstania heterogenica*; *Saccharomyces uvarum*; *Saccharomyces paradoxus*; *Saccharomyces kudriavzevii*; *Zygosaccharomyces pseudorouxii*; *Tetrapisispora pingtungensis*; *Tetrapisispora taiwanensis*; *Tetrapisispora iriomotensis*; *Zygosaccharomyces kombuchaensis*; *Nakaseomyces kungkrabaensis*; *Nakaseomyces uthaithaninus*; *Kluyveromyces nonfermentans*; *Kluyveromyces siamensis*; *Lachancea lanzarotensis*; *Lachancea meyersii*; *Tetrapisispora phaffii*; *Zygosaccharomyces sapae*; *Grigorovia humatica*; *Zygosaccharomyces mellis*; *Grigorovia yakushimaensis*; *Grigorovia jiainica*; *Kazachstania bromeliacearum*; *Kazachstania bovina*; *Saccharomyces mikatae*; *Saccharomyces jurei*; *Kazachstania naganishii*; *Tetrapisispora arboricola*; *Vanderwaltozyma tropicalis* |
| P | Q | −/+ | 2 | *Tetrapisispora fleetii*; *Tetrapisispora nanseiensis* |
| P | Q38L | − | 3 | *Maudiozyma saulgeensis*; *Kazachstania kunashirensis*; *Yueomyces sinensis* |
| P | Q38L | + | 4 | *Kazachstania humilis*; *Vanderwaltozyma yarrowii*; *Kazachstania africana*; *Lachancea mirantina* |
| P | Q38L | −/+ | 4 | *Kazachstania bulderi*; *Kazachstania piceae*; *Kazachstania humilis*; *Naumovozyma castellii* |
| P | Q38L | delayed | 1 | *Torulaspora globosa* |
| P | Q38L 2 copies | −/+ | 1 | *Kazachstania exigua* |
| P | Q38M | − | 1 | *Naumovozyma dairenensis* |

*Cycl, combined cycloheximide phenotype from 0.1% and 0.01% cycloheximide assays; n, number of species represented in each grouped row.*

**Table 8 Saccharomycodales**

| **eL42** | **uL15** | **Cycl** | **n** | **Species** |
| --- | --- | --- | --- | --- |
| P56Q | Q | − | 2 | *Hanseniaspora thailandica*; *Hanseniaspora singularis* |
| P56Q | Q | + | 9 | *Hanseniaspora mollemarum*; *Hanseniaspora clermontiae*; *Hanseniaspora guilliermondii*; *Hanseniaspora lachancei*; *Hanseniaspora uvarum*; *Hanseniaspora valbyensis*; *Hanseniaspora lindneri*; *Hanseniaspora pseudoguilliermondii*; *Hanseniaspora nectarophila* |
| P | Q | − | 6 | *Hanseniaspora occidentalis var. citrica*; *Hanseniaspora occidentalis var. occidentalis*; *Hanseniaspora osmophila*; *Saccharomycodes ludwigii*; *Hanseniaspora vineae*; *Hanseniaspora taiwanica* |

*Cycl, combined cycloheximide phenotype from 0.1% and 0.01% cycloheximide assays; n, number of species represented in each grouped row.*

**Table 9 Serinales**

| **eL42** | **uL15** | **Cycl** | **n** | **Species** |
| --- | --- | --- | --- | --- |
| P56Q/P56Q/P56P | Q | − | 1 | *Candida tropicalis* |
| P56Q/P56Q/P56P | Q | + | 3 | *Candida sojae; Candida pseudoviswanathii;Candida sanyaensis* |
| P56Q/P56Q/ P56Q/P56Q/P56P | Q | + | 1 | *Candida maltosa* |
| P56Q/P56P/P56P | Q | − | 1 | *Metschnikowia pulcherrima* |
| P56Q/P56P | Q | − | 10 | *Candida golubevii*; *Metschnikowia henanensis*; *Metschnikowia kofuensis*; *Metschnikowia reukaufii*; *Kodamaea mesenterica*; *Metschnikowia noctiluminum*; *Metschnikowia koreensis*; *Metschnikowia corniflorae*; *Kodamaea derodonti*; *Kodamaea arcana* |
| P56Q/P56P | Q | + | 6 | *Teunomyces stri*; *Teunomyces atbi*; *Teunomyces barrocoloradensis*; *Teunomyces cretensis*; *Kodamaea jinghongensis*; *Teunomyces gatunensis* |
| P56Q | Q | + | 27 | *Candida nonsorbophila*; *Scheffersomyces illinoinensis*; *Candida albicans*; *Aciculoconidium aculeatum*; *Candida tammaniensis*; *Schwanniomyces occidentalis var. persoonii*; *Schwanniomyces polymorphus var. polymorphus*; *Schwanniomyces pseudopolymorphus*; *Schwanniomyces vanrijiae var. yarrowii*; *Schwanniomyces polymorphus var. africanus*; *Yamadazyma tumulicola*; *Yamadazyma insecticola*; *Limtongozyma cylindracea*; *Metschnikowia zobellii*; *Schwanniomyces vanrijiae var. vanrijiae*; *Schwanniomyces yamadae*; *Candida entomophila*; *Hyphopichia homilentoma*; *Suhomyces choctaworum*; *Candida buenavistaensis*; *Candida dubliniensis*; *Danielozyma ontarioensis*; *Priceomyces medius*; *Schwanniomyces occidentalis var. occidentalis*; *Wickerhamia fluorescens*; *Scheffersomyces titanus (Scheffersomyces titani)*; *Schwanniomyces capriottii* |
| P56Q | Q | − | 1 | *Candida khao-thaluensis* |
| P56P/P56Q/P56Q | Q | − | 1 | *Candida neerlandica* |
| P56Q | Q38L | + | 1 | *Candida fluviatilis* |
| P56Q | Q38M | + | 1 | *Candida chilensis* |
| P | Q | − | 182 | *Metschnikowia krissii*; *Yamadazyma mexicana*; *Clavispora fructus (2)*; *Debaryomyces coudertii*; *Metschnikowia torresii*; *Yamadazyma tenuis*; *Candida sophiae-reginae*; *Debaryomyces robertsiae*; *Metschnikowia caudata*; *Metschnikowia bicuspidata var. chathamia*; *Metschnikowia agaves*; *Schwanniomyces etchellsii*; *Debaryomyces prosopidis*; *Metschnikowia bowlesiae*; *Candida ipomoeae*; *Metschnikowia gruessii*; *Metschnikowia continentalis*; *Metschnikowia proteae*; *Metschnikowia shivogae*; *Candida diddensiae*; *Hemisphaericaspora insectamans*; *Kodamaea alishanica*; *Kodamaea lidongshanica*; *Candida verbasci*; *Candida smagusa*; *Scheffersomyces gosingicus*; *Teunomyces funiuensis*; *Kodamaea kaohsiungensis*; *Candida melibiosica*; *Candida pseudoaaseri*; *Kodamaea suecica*; *Candida tallmaniae*; *Candida vaughaniae*; *Hyphopichia pseudoburtonii*; *Kodamaea kakaduensis*; *Yamadazyma akitaensis*; *Yamadazyma dushanensis*; *Yamadazyma olivae*; *Candida conglobata*; *Candida dendronema*; *Candida multigemmis*; *Candida membranifaciens*; *Diutina rugosa*; *Candida trypodendri*; *Metschnikowia australis*; *Metschnikowia bicuspidata var. californica*; *Nematodospora anomalae*; *Suhomyces coccinellae*; *Candida vulturna*; *Suhomyces faveliae*; *Metschnikowia baotianmanensis*; *Candida mogii*; *Hyphopichia burtonii*; *Hyphopichia gotoi*; *Hyphopichia rhagii*; *Priceomyces haplophilus*; *Yamadazyma triangularis*; *Yamadazyma scolyti*; *Yamadazyma philogaea*; *Clavispora opuntiae*; *Hyphopichia heimii*; *Hyphopichia fennica*; *Millerozyma farinosa*; *Kurtzmaniella fragi*; *Priceomyces castillae*; *Priceomyces carsonii*; *Priceomyces melissophilus*; *Yamadazyma nakazawae*; *Candida aaseri*; *Candida atlantica*; *Candida atmosphaerica*; *Candida germanica*; *Babjeviella inositovora*; *Suhomyces pyralidae*; *Suhomyces xylopsoci*; *Candida oregonensis*; *Kodamaea anthophila*; *Clavispora lusitaniae*; *Candida pseudoglaebosa*; *Kodamaea restingae*; *Metschnikowia bicuspidata var. bicuspidata*; *Kodamaea nitidulidarum*; *Candida buinensis*; *Candida gorgasii*; *Candida friedrichii*; *Candida endomychidarum*; *Metschnikowia chrysomelidarum*; *Candida lyxosophila*; *Debaryomyces subglobosus*; *Metschnikowia kunwiensis*; *Metschnikowia drosophilae*; *Metschnikowia vanudenii*; *Metschnikowia hawaiiana*; *Metschnikowia borealis*; *Metschnikowia hibisci*; *Metschnikowia hawaiiensis*; *Metschnikowia hamakuensis*; *Metschnikowia dekortorum*; *Metschnikowia lochheadii*; *Metschnikowia similis*; *Candida sequanensis*; *Yamadazyma paraphyllophila*; *Candida chanthaburiensis*; *Candida danieliae*; *Hyphopichia khmerensis*; *Candida phyllophila*; *Candida suratensis*; *Candida vitiphila*; *Teunomyces panamensis*; *Candida oceani*; *Candida subhashii*; *Candida xylanilytica*; *Hyphopichia wangnamkhiaoensis*; *Yamadazyma epiphylla*; *Yamadazyma kitorensis*; *Yamadazyma phyllophila*; *Yamadazyma takamatsuzukensis*; *Yamadazyma ubonensis*; *Candida auris*; *Suhomyces taliae*; *Candida blattariae*; *Candida carvajalis*; *Candida michaelii*; *Teunomyces pallodes*; *Candida sake*; *Candida coleopterorum*; *Candida asparagi*; *Kurtzmaniella cleridarum*; *Candida blattae*; *Candida saitoana*; *Candida palmioleophila*; *Candida anglica*; *Candida cerambycidarum*; *Teunomyces lycoperdinae*; *Teunomyces tritomae*; *Suhomyces maxii*; *Suhomyces kunorum*; *Suhomyces guaymorum*; *Suhomyces chickasaworum*; *Candida caryicola*; *Suhomyces bolitotheri*; *Suhomyces bokatorum*; *Suhomyces atakaporum*; *Suhomyces panamericanus*; *Suhomyces prunicola*; *Suhomyces tanzawaensis*; *Suhomyces wounanorum*; *Hemisphaericaspora nanyangensis*; *Kodamaea leandrae*; *Kodamaea plutei*; *Diutina siamensis*; *Yamadazyma endophytica*; *Metschnikowia kamakouana*; *Metschnikowia arizonensis*; *Candida tolerans*; *Debaryomyces marama*; *Debaryomyces nepalensis*; *Candida berkhoutiae*; *Candida ezoensis*; *Candida inulinophila*; *Candida loeiensis*; *Candida tanticharoeniae*; *Candida kanchanaburiensis*; *Metschnikowia lachancei*; *Scheffersomyces spartinae*; *Candida parachauliodis*; *Lodderomyces beijingensis*; *Candida margitis*; *Candida gigantensis*; *Candida rhizophorensis*; *Kodamaea ohmeri*; *Candida insectorum*; *Suhomyces canberraensis*; *Suhomyces vadensis*; *Candida corydali*; *Candida intermedia*; *Candida pseudointermedia*; *Debaryomyces hansenii*; *Kurtzmaniella quercitrusa*; *Millerozyma acaciae*; *Candida citri* |
| P | Q | + | 34 | *Candida ascalaphidarum*; *Metschnikowia laotica*; *Debaryomyces udenii*; *Meyerozyma caribbica*; *Scheffersomyces ergatensis*; *Scheffersomyces coipomensis*; *Kurtzmaniella oleophila*; *Candida pseudoflosculorum*; *Scheffersomyces lignicola*; *Candida haemuli*; *Candida anutae*; *Scheffersomyces lignosus*; *Teunomyces aglyptinius*; *Diutina catenulata*; *Scheffersomyces quercinus*; *Scheffersomyces insectosa*; *Scheffersomyces virginianus*; *Candida xiaguanensis*; *Meyerozyma carpophila*; *Meyerozyma guilliermondii (2)*; *Candida santamariae*; *Priceomyces fermenticarens*; *Teunomyces kruisii*; *Lodderomyces elongisporus*; *Candida duobushaemuli*; *Candida savonica*; *Candida boleticola*; *Candida schatavii*; *Candida zeylanoides*; *Meyerozyma smithsonii*; *Meyerozyma athensensis*; *Candida railenensis*; *Candida tsuchiyae* |
| P | Q | −/+ | 22 | *Debaryomyces fabryi*; *Candidozyma konsanensis*; *Candida andamanensis*; *Sungouiella ecuadorensis*; *Sungouiella middelhoveniana*; *Candida theae*; *Candida thailandica*; *Metschnikowia lopburiensis*; *Diutina scorzettiae*; *Diutina ranongensis*; *Suhomyces yuchorum*; *Yamadazyma siamensis*; *Candida parablackwelliae*; *Candida chauliodis*; *Candida dosseyi*; *Meyerozyma elateridarum*; *Suhomyces ambrosiae*; *Suhomyces anneliseae*; *Suhomyces bribrorum*; *Candida bohioensis*; *Candida parapsilosis*; *Candida glaebosa* |
| P | Q (2) | − | 1 | *Spathaspora arborariae* |
| P | Q38A | − | 1 | *Nematodospora valgi* |
| P | Q38F | + | 1 | *Candida palmyrensis* |
| P | Q38F | −/+ | 1 | *Candida lessepsii* |
| P | Q38L | − | 7 | *Australozyma picinguabensis*; *Candida saopauloensis*; *Candida silvanorum*; *Australozyma robnettiae*; *Australozyma nongkhaiensis*; *Hermanozyma ubatubensis*; *Metschnikowia mauinuiana* |
| P | Q38L | + | 1 | *Candida touchengensis* |
| P | Q38L | −/+ | 1 | *Metschnikowia saccharicola* |
| P | Q38M | −/+ | 2 | *Kodamaea hsintzibuensis*; *Kodamaea neixiangensis* |
| P | Q38M | − | 1 | *Sungouiella sharkensis* |
| P | Q38Q/Q38M | − | 1 | *Metschnikowia santaceciliae* |

*Cycl, combined cycloheximide phenotype from 0.1% and 0.01% cycloheximide assays; n, number of species represented in each grouped row.*

**Table 10 Sporopachydermiales and Trigonopsidales**

| **Order** | **eL42** | **uL15** | **Cycl** | **n** | **Species** |
| --- | --- | --- | --- | --- | --- |
| Sporopachydermiales | P56Q | Q | + | 3 | *Sporopachydermia cereana*; *Sporopachydermia lactativora*; *Sporopachydermia quercuum* |
| Trigonopsidales | P56Q | Q | + | 5 | *Botryozyma nematodophila*; *Ascobotryozyma americana*; *Trigonopsis variabilis*; *Trigonopsis vinaria*; *Trigonopsis cantarellii* |
| Trigonopsidales | P | Q38L | + | 2 | *Tortispora starmeri*; *Tortispora phaffii* |
| Trigonopsidales | P | Q38L | − | 1 | *Tortispora ganteri* |
| Trigonopsidales | P | Q38L | delayed | 4 | *Tortispora caseinolytica*; *Tortispora mauiana*; *Tortispora agaves*; *Tortispora sangerardonensis* |

*Cycl, combined cycloheximide phenotype from 0.1% and 0.01% cycloheximide assays; n, number of species represented in each grouped row.*
