# Supplementary material
Source: Research Square preprint supplement (doi:10.21203/rs.3.rs-9313202/v1)
Supplement: Supplementary file 5 [file 80a0a1c36ca788b11a85e651.xlsx]

## Sheet: Sheet1
ID	Length_nt	NA_sequence	CLEAN	CAA version:	CAG version:	pick the earliest (first) of the two, or blank if neither found:	Validate that every “N” really is A/C/G/T	are the N’s valid? (returns VALID/INVALID/blank)	Column1	Add the amino acid name
yHMPu5000035694_hanseniaspora_occidentalis_var_citrica_160519.haplomerger2.g002157.m1	4236	ATGAGAAGATACAGTATACAGAGTGGGAACTCACTAGATAGTATCCAGGCATCTGGAACTACAAACAACACGCATCCAAAGAGACACTCTATATTGAGCAACTTGGCCATATACAGTGGGATGGACGATGTTGACACGGGAAATATAGATTTGATTAACGATAATGATAATGACAACGACGAGATAGAAGGTGAGGATGGTGTTGTGAATTGTAATCCCAGTGGCAGTAGTGGCGGCAATGAGAGTAGTGGCACTAATGATAGTAGTGGGAGTATAGATAGTATGCACAGCTCCAACACGACAGATCATGTACACGGTGTAGAACAAAGTGTTAAGATAGGGGATGTAGAAAGAGATGATGTGTCTTTTGTGTTGCCCTGTGTTCCTACAAGTGAGTCC…	ATGAGAAGATACAGTATACAGAGTGGGAACTCACTAGATAGTATCCAGGCATCTGGAACTACAAACAACACGCATCCAAAGAGACACTCTATATTGAGCAACTTGGCCATATACAGTGGGATGGACGATGTTGACACGGGAAATATAGATTTGATTAACGATAATGATAATGACAACGACGAGATAGAAGGTGAGGATGGTGTTGTGAATTGTAATCCCAGTGGCAGTAGTGGCGGCAATGAGAGTAGTGGCACTAATGATAGTAGTGGGAGTATAGATAGTATGCACAGCTCCAACACGACAGATCATGTACACGGTGTAGAACAAAGTGTTAAGATAGGGGATGTAGAAAGAGATGATGTGTCTTTTGTGTTGCCCTGTGTTCCTACAAGTGAGTCC…	#VALUE!		#VALUE!	#VALUE!	#VALUE!	#VALUE!	#VALUE!
yHMPu5000041807_metschnikowia_bicuspidata_var_chathamia_190924.haplomerger2.g000766.m1	4236	ATGGTTAACGTTCCAAAGCTTAGAAGAACCTTCTGTAAGGGTAAGGAATGCCGCAAGCACACCCAACACAAGGTCACCCAATACAAGGCTGGTAAGGCTTCTTTGTTTGCCCAAGGTAAGAGAAGATACGACCGTAAGCAGTCCGGTTTCGGTGGTCAGACCAAGCCAGTTTTCCACAAAAAGGCCAAGACCACCAAGAAGGTTGTCTTGAGATTGGAGTGTGTCAACTGTAAGACCAAGGCCCAGCTCTCCTTGAAGAGATGTAAGCACTTCGAGTTGGGTGGTGACAAGAAGCAAAAGGGTCAAGCTTTGCAATTCTAA	ATGGTTAACGTTCCAAAGCTTAGAAGAACCTTCTGTAAGGGTAAGGAATGCCGCAAGCACACCCAACACAAGGTCACCCAATACAAGGCTGGTAAGGCTTCTTTGTTTGCCCAAGGTAAGAGAAGATACGACCGTAAGCAGTCCGGTTTCGGTGGTCAGACCAAGCCAGTTTTCCACAAAAAGGCCAAGACCACCAAGAAGGTTGTCTTGAGATTGGAGTGTGTCAACTGTAAGACCAAGGCCCAGCTCTCCTTGAAGAGATGTAAGCACTTCGAGTTGGGTGGTGACAAGAAGCAAAAGGGTCAAGCTTTGCAATTCTAA	#VALUE!	151	#VALUE!	#VALUE!	#VALUE!	#VALUE!	#VALUE!			Proline	582
yHMPu5000037868_metschnikowia_bicuspidata_var_californica_180604.haplomerger2.g002157.m1	4236	ATGGTTAACGTTCCAAAGCTTAGAAGAACCTTCTGTAAGGGTAAGGAATGCCGCAAGCACACCCAACACAAGGTCACCCAATACAAGGCTGGTAAGGCTTCTTTGTTTGCCCAAGGTAAGAGAAGATACGACCGTAAGCAGTCCGGTTTCGGTGGTCAGACCAAGCCAGTTTTCCACAAAAAGGCCAAGACCACCAAGAAGGTTGTCTTGAGATTGGAGTGTGTCAACTGTAAGACCAAGGCCCAGCTCTCCTTGAAGAGATGTAAGCACTTCGAGTTGGGTGGTGACAAGAAGCAAAAGGGTCAAGCTTTGCAATTCTAA	ATGGTTAACGTTCCAAAGCTTAGAAGAACCTTCTGTAAGGGTAAGGAATGCCGCAAGCACACCCAACACAAGGTCACCCAATACAAGGCTGGTAAGGCTTCTTTGTTTGCCCAAGGTAAGAGAAGATACGACCGTAAGCAGTCCGGTTTCGGTGGTCAGACCAAGCCAGTTTTCCACAAAAAGGCCAAGACCACCAAGAAGGTTGTCTTGAGATTGGAGTGTGTCAACTGTAAGACCAAGGCCCAGCTCTCCTTGAAGAGATGTAAGCACTTCGAGTTGGGTGGTGACAAGAAGCAAAAGGGTCAAGCTTTGCAATTCTAA	#VALUE!	151	#VALUE!	#VALUE!	#VALUE!	#VALUE!	#VALUE!			Glutamine	278
yHMPu5000041832_candida_sophiae_reginae_170307.g000309.m1	4236	ATGGTTAACGTTCCAAAGACCAGAAAGACCTACTGTAAGGGTAAACAATGTCGTAAACACACCCAACACAAGGTTACTCAATACAAGGCTGGTAAGGCTTCCTTATTTGCTCAAGGTAAGAGAAGATATGACCGTAAACAATCCGGTTTCGGTGGTCAAACTAAACCAGTTTTCCACAAGAAAGCTAAGACTACCAAGAAAGTTGTCTTAAGATTAGAATGTGTTGTTTGCAAGACCAAGGCTCAATTATCCTTAAAGAGATGTAAGCATTTCGAATTAGGTGGTGACAAGAAGCAAAAGGGTCAAGCTTTACAATTTTAA	ATGGTTAACGTTCCAAAGACCAGAAAGACCTACTGTAAGGGTAAACAATGTCGTAAACACACCCAACACAAGGTTACTCAATACAAGGCTGGTAAGGCTTCCTTATTTGCTCAAGGTAAGAGAAGATATGACCGTAAACAATCCGGTTTCGGTGGTCAAACTAAACCAGTTTTCCACAAGAAAGCTAAGACTACCAAGAAAGTTGTCTTAAGATTAGAATGTGTTGTTTGCAAGACCAAGGCTCAATTATCCTTAAAGAGATGTAAGCATTTCGAATTAGGTGGTGACAAGAAGCAAAAGGGTCAAGCTTTACAATTTTAA	151		151	GGTGGTCAAACTAAA	VALID	CCA	Proline			Glutamic acid	0
yHMPu5000035318_hyphopichia_heimii_180604.g001234.m1	4236	ATGGTTAACGTTCCAAAAACTAGAAAGACCTACTGTAAGGGTAAAGAATGTAAAAAACACACCCAACATAAAGTTACCCAATACAAGGCTGGTAAAGCTTCCTTATTTGCCCAAGGTAAAAGAAGATATGACCGTAAACAAAAAGGTTTCGGTGGTCAAACCAAACCAGTTTTCCATAAAAAAGCTAAAACCACCAAGAAGGTTGTTTTAAGATTGGAATGTGTTGTTTGCAAAACCAAAGCTCAATTATCATTAAAGAGATGTAAGCATTTCGAATTGGGTGGTGACAAAAAACAAAAAGGTCAAGCTTTACAATTTTAA	ATGGTTAACGTTCCAAAAACTAGAAAGACCTACTGTAAGGGTAAAGAATGTAAAAAACACACCCAACATAAAGTTACCCAATACAAGGCTGGTAAAGCTTCCTTATTTGCCCAAGGTAAAAGAAGATATGACCGTAAACAAAAAGGTTTCGGTGGTCAAACCAAACCAGTTTTCCATAAAAAAGCTAAAACCACCAAGAAGGTTGTTTTAAGATTGGAATGTGTTGTTTGCAAAACCAAAGCTCAATTATCATTAAAGAGATGTAAGCATTTCGAATTGGGTGGTGACAAAAAACAAAAAGGTCAAGCTTTACAATTTTAA	151		151	GGTGGTCAAACCAAA	VALID	CCA	Proline
yHMPu5000035685_hanseniaspora_1_sp_nov._diego_libkind_160519.g002415.m1	4236	ATGGTAAACGTTCCAAAGACCAGAAAGACCTATTGTAAGGGTAAACAATGTAGAAAGCACACCCAACACAAAGTTACCCAATACAAGGCTGGTAAAGCTTCCTTATACGCTCAAGGTAAGAGAAGATATGACAGAAAGCAAGCCGGTTTCGGTGGTCAAACCAAGCAAATTTTCCACAAGAAAGCTAAAACTACCAAGAAGGTTGTTTTGAAATTGGAATGTGTTGAATGTAAGACAAAAGCCCAATTAGCCTTAAAGAGATGTAAGCACTTCGAATTAGGTGGTGAAAGAAAGCAAAAGGGTCAAGCTTTACAATTCTGA	ATGGTAAACGTTCCAAAGACCAGAAAGACCTATTGTAAGGGTAAACAATGTAGAAAGCACACCCAACACAAAGTTACCCAATACAAGGCTGGTAAAGCTTCCTTATACGCTCAAGGTAAGAGAAGATATGACAGAAAGCAAGCCGGTTTCGGTGGTCAAACCAAGCAAATTTTCCACAAGAAAGCTAAAACTACCAAGAAGGTTGTTTTGAAATTGGAATGTGTTGAATGTAAGACAAAAGCCCAATTAGCCTTAAAGAGATGTAAGCACTTCGAATTAGGTGGTGAAAGAAAGCAAAAGGGTCAAGCTTTACAATTCTGA	151		151	GGTGGTCAAACCAAG	VALID	CAA	Glutamine
yHMPu5000037879_Lipomyces_spencermartinsiae_S172_SPADES.g001418.m1	4236	ATGGTTAACATTCCCAAGACCCGACGAACATACTGCAAGTCTAAGGAGTGCCGCAAGCACACCCAGCACAAGGTCACTCAGTACAAGGCTGGCAAGGCTTCGCTATATGCCCAGGGAAAGCGTCGATACGACCGTAAACAGCGAGGTTATGGTGGTCAAACTAAGCAGGTTTTCCACAAGAAGGCTAAAACCACGAAGAAGGTTGTTCTTCGTCTCGAGTGCACCGTTTGTAAGACCAAGGCCCAGCTCCCATTGAAGCGATGCAAGCACTTTGAACTTGGTGGTGACAAGAAACAGAAGGGTCAGGCTCTACAGTTCTAA	ATGGTTAACATTCCCAAGACCCGACGAACATACTGCAAGTCTAAGGAGTGCCGCAAGCACACCCAGCACAAGGTCACTCAGTACAAGGCTGGCAAGGCTTCGCTATATGCCCAGGGAAAGCGTCGATACGACCGTAAACAGCGAGGTTATGGTGGTCAAACTAAGCAGGTTTTCCACAAGAAGGCTAAAACCACGAAGAAGGTTGTTCTTCGTCTCGAGTGCACCGTTTGTAAGACCAAGGCCCAGCTCCCATTGAAGCGATGCAAGCACTTTGAACTTGGTGGTGACAAGAAACAGAAGGGTCAGGCTCTACAGTTCTAA	151		151	GGTGGTCAAACTAAG	VALID	CAG	Glutamine
yHMPu5000034744_lipomyces_spencermartinsiae_170307.g000168.m1	4236	ATGCTGCGGCTTCACAGCCTTTCACGGGCACTTGCCTGGTTTTTAATGCTGTTGAAGGTCCTGCAGGGTAGCAAGATGAAGCCGGATCTGCTGATGTCTCATCGCTTCAAGTTATCTGAAATTGAAAGTGCGAATGATATCTTTGTTAATATTCCCAAGACCCGACGAACGTACTGCAAGTCGAAGGAGTGCCGCAAGCACACCCAGCACAAGGTCACTCAGTACAAGGCCGGCAAAGCTTCGCTATATGCTCAGGGCAAGCGTCGATACGACCGTAAGCAGAGAGGTTATGGTGGTCAGACTAAGCAGGTTTTCCACAAGAAGGCTAAAACCACCAAGAAGGTTGTTCTTCGTCTCGAGTGCACCGTTTGCAAGACCAAGGCCCAGCTTCCATTGAAG…	ATGCTGCGGCTTCACAGCCTTTCACGGGCACTTGCCTGGTTTTTAATGCTGTTGAAGGTCCTGCAGGGTAGCAAGATGAAGCCGGATCTGCTGATGTCTCATCGCTTCAAGTTATCTGAAATTGAAAGTGCGAATGATATCTTTGTTAATATTCCCAAGACCCGACGAACGTACTGCAAGTCGAAGGAGTGCCGCAAGCACACCCAGCACAAGGTCACTCAGTACAAGGCCGGCAAAGCTTCGCTATATGCTCAGGGCAAGCGTCGATACGACCGTAAGCAGAGAGGTTATGGTGGTCAGACTAAGCAGGTTTTCCACAAGAAGGCTAAAACCACCAAGAAGGTTGTTCTTCGTCTCGAGTGCACCGTTTGCAAGACCAAGGCCCAGCTTCCATTGAAG…	#VALUE!	292	#VALUE!	#VALUE!	#VALUE!	#VALUE!	#VALUE!
yHMPu5000040917_geotrichum_citriaurantii_201018.g006779.m1	4236	ATGGTTAACATTCCCAAGACCAGAAAGACTTACTGCAAGGGCAAGGAGTGCCGCAAGCACACCCAGCACAAGGTTACCCAGTACAAGGCCGGTAAGGCCTCCCTTTACGCCCAGGGTAAGCGTCGTTACGACAGAAAGCAGAGCGGTTACGGTGGTCAGACCAAGCAGATCTTCCACAAGAAGGCTAAGACCACCAAGAAGGTTGTCCTTAGACTGGAGTGCACTGTCTGCAAGGTCAAGGCTCAGCTCCCTCTCAAGAGATGCAAGCACTTTGAGCTTGGTGGTGACAAGAAGCAGAAGGGTCAGGCCCTGCAGTTCTAA	ATGGTTAACATTCCCAAGACCAGAAAGACTTACTGCAAGGGCAAGGAGTGCCGCAAGCACACCCAGCACAAGGTTACCCAGTACAAGGCCGGTAAGGCCTCCCTTTACGCCCAGGGTAAGCGTCGTTACGACAGAAAGCAGAGCGGTTACGGTGGTCAGACCAAGCAGATCTTCCACAAGAAGGCTAAGACCACCAAGAAGGTTGTCCTTAGACTGGAGTGCACTGTCTGCAAGGTCAAGGCTCAGCTCCCTCTCAAGAGATGCAAGCACTTTGAGCTTGGTGGTGACAAGAAGCAGAAGGGTCAGGCCCTGCAGTTCTAA	#VALUE!	151	#VALUE!	#VALUE!	#VALUE!	#VALUE!	#VALUE!
yHMPu5000040917_geotrichum_citriaurantii_201018.g006779.m1	4236	ATGGTTAACATTCCCAAGACCAGAAAGACTTACTGCAAGGGCAAGGAGTGCCGCAAGCACACCCAGCACAAGGTTACCCAGTACAAGGCCGGTAAGGCCTCCCTTTACGCCCAGGGTAAGCGTCGTTACGACAGAAAGCAGAGCGGTTACGGTGGTCAGACCAAGCAGATCTTCCACAAGAAGGCTAAGACCACCAAGAAGGTTGTCCTTAGACTGGAGTGCACTGTCTGCAAGGTCAAGGCTCAGCTCCCTCTCAAGAGATGCAAGCACTTTGAGCTTGGTGGTGACAAGAAGCAGAAGGGTCAGGCCCTGCAGTTCTAA	ATGGTTAACATTCCCAAGACCAGAAAGACTTACTGCAAGGGCAAGGAGTGCCGCAAGCACACCCAGCACAAGGTTACCCAGTACAAGGCCGGTAAGGCCTCCCTTTACGCCCAGGGTAAGCGTCGTTACGACAGAAAGCAGAGCGGTTACGGTGGTCAGACCAAGCAGATCTTCCACAAGAAGGCTAAGACCACCAAGAAGGTTGTCCTTAGACTGGAGTGCACTGTCTGCAAGGTCAAGGCTCAGCTCCCTCTCAAGAGATGCAAGCACTTTGAGCTTGGTGGTGACAAGAAGCAGAAGGGTCAGGCCCTGCAGTTCTAA	#VALUE!	151	#VALUE!	#VALUE!	#VALUE!	#VALUE!	#VALUE!
yHMPu5000040917_geotrichum_citriaurantii_201018.g007290.m1	4236	ATGGGTACGTTTGAAATTGCAACGGCTGCTATCTGGTTATTTGAGTGCATGAAGCTTGTCAAAATGGTTAAACAGAATGAAAGACGATTTGTTGTTATGTTTGCGACACCGAGAGAGCAAGAAATTAACATTCCCAAGACCAGAAAGACCTACTGCAAGGGTAAGGAGTGCCGCAAGCACACCCAACACAAGGTTACCCAGTACAAGGCCGGTAAGGCCTCCCTTTACGCCCAGGGTAAGCGTCGTTACGACCGTAAGCAGAGCGGTTACGGTGGTCAGACCAAGCAGATTTTCCACAAGAAGGCTAAGACCACCAAGAAGGTCGTTCTCCGTCTGGAATGCACTGTTTGCAAGGTCAAGGCTCAGCTCCCTCTCAAGAGATGCAAGCACTTCGAGCTT…	ATGGGTACGTTTGAAATTGCAACGGCTGCTATCTGGTTATTTGAGTGCATGAAGCTTGTCAAAATGGTTAAACAGAATGAAAGACGATTTGTTGTTATGTTTGCGACACCGAGAGAGCAAGAAATTAACATTCCCAAGACCAGAAAGACCTACTGCAAGGGTAAGGAGTGCCGCAAGCACACCCAACACAAGGTTACCCAGTACAAGGCCGGTAAGGCCTCCCTTTACGCCCAGGGTAAGCGTCGTTACGACCGTAAGCAGAGCGGTTACGGTGGTCAGACCAAGCAGATTTTCCACAAGAAGGCTAAGACCACCAAGAAGGTCGTTCTCCGTCTGGAATGCACTGTTTGCAAGGTCAAGGCTCAGCTCCCTCTCAAGAGATGCAAGCACTTCGAGCTT…	#VALUE!	271	#VALUE!	#VALUE!	#VALUE!	#VALUE!	#VALUE!
yHMPu5000034970_Candida_sp._SPAdes.g002084.m1	4236	ATGGTTAACGTTCCAAAGACCAGAAAGACCTACTGCAAAGGTAAGGACTGCCGCAAGCACACCCAGCACAAGGTCACCCAGTACAAGGCTGGTAAGGCTTCCCTCTACGCTCAGGGTAAGCGTCGTTATGACCGTAAGCAATCCGGTTATGGTGGTCAGACCAAGCAGATTTTCCACAAGAAGGCTAAGACCACCAAGAAGGTCGTCCTCCGTCTTGAGTGCATTGTCTGTAAGACCAAGGCTCAGTTGGCTTTGAAGCGTTGTAAGCACTTCGAGTTGGGTGGTGACAAGAAGCAGAAGGGTCAGGCTCTCCAGTTCTAA	ATGGTTAACGTTCCAAAGACCAGAAAGACCTACTGCAAAGGTAAGGACTGCCGCAAGCACACCCAGCACAAGGTCACCCAGTACAAGGCTGGTAAGGCTTCCCTCTACGCTCAGGGTAAGCGTCGTTATGACCGTAAGCAATCCGGTTATGGTGGTCAGACCAAGCAGATTTTCCACAAGAAGGCTAAGACCACCAAGAAGGTCGTCCTCCGTCTTGAGTGCATTGTCTGTAAGACCAAGGCTCAGTTGGCTTTGAAGCGTTGTAAGCACTTCGAGTTGGGTGGTGACAAGAAGCAGAAGGGTCAGGCTCTCCAGTTCTAA	#VALUE!	151	#VALUE!	#VALUE!	#VALUE!	#VALUE!	#VALUE!
yHMPu5000026270_Candida_sp._SPAdes.g003907.m1	4236	ATGGTTAACGTTCCAAAGACTAGAAAGACCTACTGTAAAGGTAAGGAGTGTAGAAAGCACACTCAACACAGAGTTACCCAATACAAGTCCGGTAAGGCTTCCTTATACGCTCAAGGTAAGAGAAGATATGACCGTAAGCAATCCGGTTACGGTGGTCAAACTAAGCAAGTTTTCCACAAGAAGGCTAAGACTACCAAGAAGGTTGTCTTAAGATTAGAATGTATCGTCTGTAAGACTAAGATGCAATTACCATTAAAGAGATGTAAGCATTTCGAATTAGGTGGTGATAAGAAACAAAAGGGTCAAGCCTTACAATTCTGA	ATGGTTAACGTTCCAAAGACTAGAAAGACCTACTGTAAAGGTAAGGAGTGTAGAAAGCACACTCAACACAGAGTTACCCAATACAAGTCCGGTAAGGCTTCCTTATACGCTCAAGGTAAGAGAAGATATGACCGTAAGCAATCCGGTTACGGTGGTCAAACTAAGCAAGTTTTCCACAAGAAGGCTAAGACTACCAAGAAGGTTGTCTTAAGATTAGAATGTATCGTCTGTAAGACTAAGATGCAATTACCATTAAAGAGATGTAAGCATTTCGAATTAGGTGGTGATAAGAAACAAAAGGGTCAAGCCTTACAATTCTGA	151		151	GGTGGTCAAACTAAG	VALID	CAA	Glutamine
yHMPu5000040920_candida_lactiscondensi_201018.g002091.m1	4236	ATGGTCAACATCCCCAAGACCCGCCGTACTTACTGCAAAGGCTCTCAGTGCCGTAAACACACTCAGCACAAGGTCACTCAGTACAAAGCTGGTAAGGCTTCCAACTACGCCCAAGGTAAGAGAAGATATGACCGTAAACAGAAGGGTTACGGTGGTCAGACCAAGCCCGTCTTCCATAAGAAGGCCAAGACTACAAAGAAGGTTGTCCTTCGTTTGGAGTGTGTCAGCTGTAAGACCAAGGCTCAGCTTTCTTTGAAACGTACTAAGCACTTCGAGCTCGGTGGTGAGAAGAAACAGAAGGGACAGGCTCTCCAGTTCTAA	ATGGTCAACATCCCCAAGACCCGCCGTACTTACTGCAAAGGCTCTCAGTGCCGTAAACACACTCAGCACAAGGTCACTCAGTACAAAGCTGGTAAGGCTTCCAACTACGCCCAAGGTAAGAGAAGATATGACCGTAAACAGAAGGGTTACGGTGGTCAGACCAAGCCCGTCTTCCATAAGAAGGCCAAGACTACAAAGAAGGTTGTCCTTCGTTTGGAGTGTGTCAGCTGTAAGACCAAGGCTCAGCTTTCTTTGAAACGTACTAAGCACTTCGAGCTCGGTGGTGAGAAGAAACAGAAGGGACAGGCTCTCCAGTTCTAA	#VALUE!	151	#VALUE!	#VALUE!	#VALUE!	#VALUE!	#VALUE!
yHMPu5000038108_Candida_khaothaluensis_SPADES.g005143.m1	4236	ATGGTTAATATTCCAAAAACTAGAAAGACCTACTGTAAAGGTAAGGAATGTAGAAAACACACTCAACACAAAGTTACTCAATATAAAGCTGGTAAAGCTTCTTTATTTGCTCAAGGTAAAAGAAGATATGACCGTAAACAAAGTGGTTACGGTGGTCAAACTAAACCTGTTTTCAAAAAGAAAGCTAAAACTACCAAGAAAGTTGTTTTAAGATTGGAATGTGTTAACTGTAAAACCAAATTACAATTATCATTAAAGAGATGTAAACATTTCGAATTAGGTGGAAACAAGAAACAAAAAGGTCAAGCTTTACAATTTTAG	ATGGTTAATATTCCAAAAACTAGAAAGACCTACTGTAAAGGTAAGGAATGTAGAAAACACACTCAACACAAAGTTACTCAATATAAAGCTGGTAAAGCTTCTTTATTTGCTCAAGGTAAAAGAAGATATGACCGTAAACAAAGTGGTTACGGTGGTCAAACTAAACCTGTTTTCAAAAAGAAAGCTAAAACTACCAAGAAAGTTGTTTTAAGATTGGAATGTGTTAACTGTAAAACCAAATTACAATTATCATTAAAGAGATGTAAACATTTCGAATTAGGTGGAAACAAGAAACAAAAAGGTCAAGCTTTACAATTTTAG	151		151	GGTGGTCAAACTAAA	VALID	CCT	Proline
yHMPu5000035308_nadsonia_starkeyihenricii_180604.g004966.m1	4236	ATGGTTAACGTTCCCAAGACTAGAAGAACCTACTGTAAGAAGTGTAAGGTCCACACCCAACACAAGGTCACTCAGTACAAGGCTGGTAAGGCTTCTCTTTTCGCCCAAGGTAAGAGACGTTATGACCGTAAGCAATCCGGTTTCGGTGGTCAAACCAAGCCCGTTTTCCACAAGAAGGCTAAGACTACCAAGAAGGTTGTTTTAAGACTTGAATGTGTCGTCTGTAAGACCAAGGCTCAACTCTCCCTTAAGAGATGTAAGTCTTTCGAACTTGGTGGTGATAAGAAGCAAAAGGGTCAAGCCTTACAATTCTAA	ATGGTTAACGTTCCCAAGACTAGAAGAACCTACTGTAAGAAGTGTAAGGTCCACACCCAACACAAGGTCACTCAGTACAAGGCTGGTAAGGCTTCTCTTTTCGCCCAAGGTAAGAGACGTTATGACCGTAAGCAATCCGGTTTCGGTGGTCAAACCAAGCCCGTTTTCCACAAGAAGGCTAAGACTACCAAGAAGGTTGTTTTAAGACTTGAATGTGTCGTCTGTAAGACCAAGGCTCAACTCTCCCTTAAGAGATGTAAGTCTTTCGAACTTGGTGGTGATAAGAAGCAAAAGGGTCAAGCCTTACAATTCTAA	145		145	GGTGGTCAAACCAAG	VALID	CCC	Proline
yHMPu5000035308_nadsonia_starkeyihenricii_180604.g001386.m1	4236	ATGGTTAACGTTCCCAAGACTAGAAGAACCTACTGTAAGAAGTGTAAGGTTCACACCCAACACAAGGTCACTCAATACAAGGCCGGTAAGGCTTCTCTTTTCGCCCAAGGTAAGAGACGTTATGACCGTAAGCAATCCGGTTTCGGTGGTCAAACCAAGCCCGTTTTCCACAAGAAGGCTAAGACTACCAAGAAGGTTGTCTTAAGACTTGAATGTGTCGTCTGTAAGACCAAGGCCCAATTATCCCTCAAGAGATGTAAGTCTTTCGAACTTGGTGGTGATAAGAAGCAAAAGGGTCAAGCCTTACAATTCTAA	ATGGTTAACGTTCCCAAGACTAGAAGAACCTACTGTAAGAAGTGTAAGGTTCACACCCAACACAAGGTCACTCAATACAAGGCCGGTAAGGCTTCTCTTTTCGCCCAAGGTAAGAGACGTTATGACCGTAAGCAATCCGGTTTCGGTGGTCAAACCAAGCCCGTTTTCCACAAGAAGGCTAAGACTACCAAGAAGGTTGTCTTAAGACTTGAATGTGTCGTCTGTAAGACCAAGGCCCAATTATCCCTCAAGAGATGTAAGTCTTTCGAACTTGGTGGTGATAAGAAGCAAAAGGGTCAAGCCTTACAATTCTAA	145		145	GGTGGTCAAACCAAG	VALID	CCC	Proline
yHMPu5000035695_hanseniaspora_pseudoguilliermondii_160519.haplomerger2.g000847.m1	4236	ATGATTATTGATTTTACCTATTGTAAGGGTAAGCAATGTAGAAAGCACACTCAACACAAAGTTACCCAATACAAAGCTGGTAAGGCTTCTTTATACGCTCAAGGTAAGAGAAGATATGACAGAAAGCAATCCGGTTTCGGTGGTCAAACCAAGCAAATTTTCCACAAGAAAGCTAAAACTACCAAGAAGGTTGTTTTGAAGTTAGAATGTGTTGAATGTAAGACAAAGGCTCAATTAGCTTTGAAGAGATGTAAGCACTTCGAATTAGGTGGTGAAAGAAAGCAAAAGGGTCAAGCTTTACAATTCTAA	ATGATTATTGATTTTACCTATTGTAAGGGTAAGCAATGTAGAAAGCACACTCAACACAAAGTTACCCAATACAAAGCTGGTAAGGCTTCTTTATACGCTCAAGGTAAGAGAAGATATGACAGAAAGCAATCCGGTTTCGGTGGTCAAACCAAGCAAATTTTCCACAAGAAAGCTAAAACTACCAAGAAGGTTGTTTTGAAGTTAGAATGTGTTGAATGTAAGACAAAGGCTCAATTAGCTTTGAAGAGATGTAAGCACTTCGAATTAGGTGGTGAAAGAAAGCAAAAGGGTCAAGCTTTACAATTCTAA	139		139	GGTGGTCAAACCAAG	VALID	CAA	Glutamine
yHMPu5000037199_metschnikowia_leonuri_210210._SPADES.haplomerger2.g011655.m1	4236	ATGGTGAATATTCCTAAGACCAAGAGAACTTTTTGTAAAGGGAAGAATTGCCGCAAGCATACACAGCACAAGGTAACCCAATACAAAGCAGGCAAGCCGTCTCCTACCGCGTTAGGCAAGAGAAGATACGATCGCAAACAGACGGGATACGGCGGCCAAACTAAGCAGATTTTCCGCAAAAAGGCAAAGACGACGAAAAAAATCGTGATCAAGTTGGAGTGTGTTGAATGCAAGACCAAAGCTCAATTGGCGCTCAAGAGGTGTAAGCATTTCGAGCTAGGAGGCGACAAAAAGCAGAAGGGCCAAGCTTTGCAATTTTGA	ATGGTGAATATTCCTAAGACCAAGAGAACTTTTTGTAAAGGGAAGAATTGCCGCAAGCATACACAGCACAAGGTAACCCAATACAAAGCAGGCAAGCCGTCTCCTACCGCGTTAGGCAAGAGAAGATACGATCGCAAACAGACGGGATACGGCGGCCAAACTAAGCAGATTTTCCGCAAAAAGGCAAAGACGACGAAAAAAATCGTGATCAAGTTGGAGTGTGTTGAATGCAAGACCAAAGCTCAATTGGCGCTCAAGAGGTGTAAGCATTTCGAGCTAGGAGGCGACAAAAAGCAGAAGGGCCAAGCTTTGCAATTTTGA	151		151	GGCGGCCAAACTAAG	VALID	CAG	Glutamine
yHMPu5000037199_metschnikowia_leonuri_210210._SPADES.haplomerger2.g011881.m1	4236	ATGGTCAATATTCCTAAGACGAAGAGGACTTTTTGTAAGGGGAGGAATTGCCGCAAGCATACCCAGCACAAGGTGACCCAATACAAGGCAGGCAAGCCGTCTCCGACCGCCTTAGGCAAGAGAAGATACGATCGCAAACAGACGGGCTACGGCGGCCAGACAAAGCAGATTTTCCGCAAGAAGGCAAAGACGACGAAAAAAATCGTGATTAAGTTGGAGTGTGTTGAATGCAAGACCAAGGCGCAATTGGCGCTCAAGAGGTGTAAGCATTTCGAGCTAGGGGGCGACAAAAAGCAGAAGGGCCAAGCTTTGCAGTTTTGA	ATGGTCAATATTCCTAAGACGAAGAGGACTTTTTGTAAGGGGAGGAATTGCCGCAAGCATACCCAGCACAAGGTGACCCAATACAAGGCAGGCAAGCCGTCTCCGACCGCCTTAGGCAAGAGAAGATACGATCGCAAACAGACGGGCTACGGCGGCCAGACAAAGCAGATTTTCCGCAAGAAGGCAAAGACGACGAAAAAAATCGTGATTAAGTTGGAGTGTGTTGAATGCAAGACCAAGGCGCAATTGGCGCTCAAGAGGTGTAAGCATTTCGAGCTAGGGGGCGACAAAAAGCAGAAGGGCCAAGCTTTGCAGTTTTGA	#VALUE!	151	#VALUE!	#VALUE!	#VALUE!	#VALUE!	#VALUE!
yHMPu5000035269_wickerhamomyces_ciferrii_170307_g002333.m1	4236	ATGTATTCAATAAACTCAACTATCCTACTTGAATCTAAAATCTATGATATGAATAATATACTAACAAGAACTATAGTCAACGTTCCAAAAACCAGAAAAACCTACTGTAAAGGTAAAGAGTGTAGAAAACACACTCAACACAAAGTTACCCAATACAAAGCTGGTAAAGCTTCTTTATTTGCTCAAGGTAAACGTCGTTATGACCGTAAACAATCCGGTTACGGTGGTCAAACCAAACCAGTTTTCCATAAAAAAGCTAAAACTACCAAAAAAGTTGTTTTACGTTTAGAATGTGTTGTTTGTAAAACCAAAGCTCAATTATCATTAAAACGTTGTAAACATTTCGAATTGGGTGGTGACAGAAAACAAAAAGGTCAAGCTTTACAATTCTAA	ATGTATTCAATAAACTCAACTATCCTACTTGAATCTAAAATCTATGATATGAATAATATACTAACAAGAACTATAGTCAACGTTCCAAAAACCAGAAAAACCTACTGTAAAGGTAAAGAGTGTAGAAAACACACTCAACACAAAGTTACCCAATACAAAGCTGGTAAAGCTTCTTTATTTGCTCAAGGTAAACGTCGTTATGACCGTAAACAATCCGGTTACGGTGGTCAAACCAAACCAGTTTTCCATAAAAAAGCTAAAACTACCAAAAAAGTTGTTTTACGTTTAGAATGTGTTGTTTGTAAAACCAAAGCTCAATTATCATTAAAACGTTGTAAACATTTCGAATTGGGTGGTGACAGAAAACAAAAAGGTCAAGCTTTACAATTCTAA	223		223	GGTGGTCAAACCAAA	VALID	CCA	Proline
yHMPu5000035269_wickerhamomyces_ciferrii_170307_g011286.m1	4236	ATGTATTCAAACCACTCAACTATCCTACTTGAATCCAAAATCTATGATTTGAATAATATACTAACAAGAACTATAGTCAACGTTCCAAAAACCAGAAAAACCTACTGTAAAGGTAAAGAGTGTAGAAAACACACTCAACACAAAGTTACCCAATACAAAGCTGGTAAAGCTTCTTTATTTGCTCAAGGTAAACGTCGTTATGACCGTAAACAATCCGGTTACGGTGGTCAAACCAAACCAGTTTTCCATAAAAAAGCTAAAACTACCAAAAAAGTTGTTTTACGTTTAGAATGTGTTGTTTGTAAAACCAAAGCTCAATTATCATTAAAACGTTGTAAACATTTCGAATTAGGTGGTGACAGAAAACAAAAAGGTCAAGCTTTACAATTCTAA	ATGTATTCAAACCACTCAACTATCCTACTTGAATCCAAAATCTATGATTTGAATAATATACTAACAAGAACTATAGTCAACGTTCCAAAAACCAGAAAAACCTACTGTAAAGGTAAAGAGTGTAGAAAACACACTCAACACAAAGTTACCCAATACAAAGCTGGTAAAGCTTCTTTATTTGCTCAAGGTAAACGTCGTTATGACCGTAAACAATCCGGTTACGGTGGTCAAACCAAACCAGTTTTCCATAAAAAAGCTAAAACTACCAAAAAAGTTGTTTTACGTTTAGAATGTGTTGTTTGTAAAACCAAAGCTCAATTATCATTAAAACGTTGTAAACATTTCGAATTAGGTGGTGACAGAAAACAAAAAGGTCAAGCTTTACAATTCTAA	223		223	GGTGGTCAAACCAAA	VALID	CCA	Proline
yHDO582_wickerhamomyces_queroliae_180604_g002341.m1	4236	ATGGTCAACGTTCCAAAAACCAGAAAAACCTACTGTAAAGGTAAAGAGTGTCGTAAGCACACCCAACACAAAGTTACCCAATACAAAGCTGGTAAAGCTTCTTTGTTCGCCCAAGGTAAACGTCGTTATGACCGTAAACAATCCGGTTACGGTGGTCAAACCAAACCAGTTTTCCACAAAAAGGCTAAAACCACCAAAAAGGTTGTCTTGAGATTGGAATGTGTTGTCTGTAAGACCAAGGCTCAATTATCTTTGAAACGTTGTAAGCACTTTGAATTAGGTGGTGACAGAAAACAAAAAGGTCAAGCTTTACAATTTTAA	ATGGTCAACGTTCCAAAAACCAGAAAAACCTACTGTAAAGGTAAAGAGTGTCGTAAGCACACCCAACACAAAGTTACCCAATACAAAGCTGGTAAAGCTTCTTTGTTCGCCCAAGGTAAACGTCGTTATGACCGTAAACAATCCGGTTACGGTGGTCAAACCAAACCAGTTTTCCACAAAAAGGCTAAAACCACCAAAAAGGTTGTCTTGAGATTGGAATGTGTTGTCTGTAAGACCAAGGCTCAATTATCTTTGAAACGTTGTAAGCACTTTGAATTAGGTGGTGACAGAAAACAAAAAGGTCAAGCTTTACAATTTTAA	151		151	GGTGGTCAAACCAAA	VALID	CCA	Proline
yHMH451_Wickerhamomyces_sp_nov_plate33_PLATANUS_g002785.m1	4236	ATGGTCAACGTTCCAAAAACCAGAAAAACCTACTGTAAAGGTAAAGAGTGTCGTAAACACACCCAACACAAAGTTACCCAATACAAAGCTGGTAAAGCTTCTTTGTTTGCTCAAGGTAAACGTCGTTATGACCGTAAACAATCCGGTTATGGTGGTCAAACCAAACCAGTCTTCCACAAAAAGGCTAAAACTACCAAGAAAGTTGTTTTACGTTTAGAATGTGTTGTCTGTAAGACCAAGGCTCAATTATCATTGAAACGTTGTAAACATTTCGAATTAGGTGGTGACAGAAAACAAAAAGGTCAAGCTTTACAATTCTAA	ATGGTCAACGTTCCAAAAACCAGAAAAACCTACTGTAAAGGTAAAGAGTGTCGTAAACACACCCAACACAAAGTTACCCAATACAAAGCTGGTAAAGCTTCTTTGTTTGCTCAAGGTAAACGTCGTTATGACCGTAAACAATCCGGTTATGGTGGTCAAACCAAACCAGTCTTCCACAAAAAGGCTAAAACTACCAAGAAAGTTGTTTTACGTTTAGAATGTGTTGTCTGTAAGACCAAGGCTCAATTATCATTGAAACGTTGTAAACATTTCGAATTAGGTGGTGACAGAAAACAAAAAGGTCAAGCTTTACAATTCTAA	151		151	GGTGGTCAAACCAAA	VALID	CCA	Proline
yHMPu5000034954_candida_norvegica_201018_g002825.m1	4236	ATGGTTAACGTTCCAAAAACCAGAAAAACCTACTGTAAAGGTAAAGAATGTCGTAAGCACACTCAACACAAAGTTACCCAATACAAAGCTGGTAAAGCCTCATTATTTGCCCAAGGTAAAAGACGTTATGACCGTAAACAATCCGGTTACGGTGGTCAAACCAAACCAGTCTTCCACAAAAAGGCTAAAACCACCAAGAAAGTTGTTTTACGTTTAGAATGTGTTGTCTGTAAGACCAAAGCTCAATTATCATTGAAACGTTGTAAACATTTTGAATTAGGTGGTGACAGAAAACAAAAAGGTCAAGCTTTACAATTTTAG	ATGGTTAACGTTCCAAAAACCAGAAAAACCTACTGTAAAGGTAAAGAATGTCGTAAGCACACTCAACACAAAGTTACCCAATACAAAGCTGGTAAAGCCTCATTATTTGCCCAAGGTAAAAGACGTTATGACCGTAAACAATCCGGTTACGGTGGTCAAACCAAACCAGTCTTCCACAAAAAGGCTAAAACCACCAAGAAAGTTGTTTTACGTTTAGAATGTGTTGTCTGTAAGACCAAAGCTCAATTATCATTGAAACGTTGTAAACATTTTGAATTAGGTGGTGACAGAAAACAAAAAGGTCAAGCTTTACAATTTTAG	151		151	GGTGGTCAAACCAAA	VALID	CCA	Proline
yHMPu5000035255_wickerhamomyces_rabaulensis_170307.haplomerger2_g001388.m1	4236	ATGGTTAACGTTCCAAAAACTAGAAAGACCTACTGTAAGGGTAAAGAATGTCGTAAGCACACTCAACACAAAGTCACCCAATACAAAGCTGGTAAAGCTTCCTTATTTGCTCAAGGTAAACGTCGTTATGACCGTAAACAATCCGGTTACGGTGGTCAAACCAAACCAGTCTTCCACAAAAAGGCTAAAACTACCAAGAAGGTTGTCTTACGTTTAGAATGTGTTGTTTGCAAAACCAAAGCTCAATTATCATTGAAACGTTGTAAACACTTTGAATTAGGTGGTGACAGAAAACAAAAAGGTCAAGCTTTACAATTCTAA	ATGGTTAACGTTCCAAAAACTAGAAAGACCTACTGTAAGGGTAAAGAATGTCGTAAGCACACTCAACACAAAGTCACCCAATACAAAGCTGGTAAAGCTTCCTTATTTGCTCAAGGTAAACGTCGTTATGACCGTAAACAATCCGGTTACGGTGGTCAAACCAAACCAGTCTTCCACAAAAAGGCTAAAACTACCAAGAAGGTTGTCTTACGTTTAGAATGTGTTGTTTGCAAAACCAAAGCTCAATTATCATTGAAACGTTGTAAACACTTTGAATTAGGTGGTGACAGAAAACAAAAAGGTCAAGCTTTACAATTCTAA	151		151	GGTGGTCAAACCAAA	VALID	CCA	Proline
yHMPu5000035259_wickerhamomyces_sydowiorum_170307.haplomerger2_g002941.m1	4236	ATGGTCAACGTTCCAAAAACCAGAAAAACCTACTGTAAAGGTAAGGAGTGTCGTAAACACACCCAACACAAAGTTACCCAATACAAAGCTGGTAAAGCTTCTTTGTTTGCTCAAGGTAAACGTCGTTATGACCGTAAACAATCCGGTTATGGTGGTCAAACCAAACCAGTCTTCCACAAAAAGGCTAAAACTACCAAAAAAGTTGTTTTACGTTTAGAATGTGTTGTCTGTAAGACCAAGGCTCAATTATCATTGAAACGTTGTAAACATTTCGAATTAGGTGGTGACAGAAAACAAAAAGGTCAAGCTTTACAATTCTAA	ATGGTCAACGTTCCAAAAACCAGAAAAACCTACTGTAAAGGTAAGGAGTGTCGTAAACACACCCAACACAAAGTTACCCAATACAAAGCTGGTAAAGCTTCTTTGTTTGCTCAAGGTAAACGTCGTTATGACCGTAAACAATCCGGTTATGGTGGTCAAACCAAACCAGTCTTCCACAAAAAGGCTAAAACTACCAAAAAAGTTGTTTTACGTTTAGAATGTGTTGTCTGTAAGACCAAGGCTCAATTATCATTGAAACGTTGTAAACATTTCGAATTAGGTGGTGACAGAAAACAAAAAGGTCAAGCTTTACAATTCTAA	151		151	GGTGGTCAAACCAAA	VALID	CCA	Proline
yHMPu5000035266_wickerhamomyces_onychis_170307.haplomerger2_g000932.m1	4236	ATGGTTAACGTTCCAAAAACTAGAAAGACCTACTGTAAGGGTAAAGAATGTCGTAAGCACACTCAACACAAAGTCACCCAATACAAAGCTGGGAAGGCTTCCTTATTTGCTCAAGGTAAACGTCGTTATGACCGTAAACAATCCGGTTACGGTGGTCAAACCAAACCAGTCTTCCACAAAAAGGCTAAAACTACCAAAAAGGTTGTCTTACGTTTAGAATGTGTTGTTTGCAAAACCAAAGCTCAATTATCATTGAAACGTTGTAAACACTTTGAATTAGGTGGTGACAGAAAACAAAAAGGTCAAGCTTTACAATTCTAA	ATGGTTAACGTTCCAAAAACTAGAAAGACCTACTGTAAGGGTAAAGAATGTCGTAAGCACACTCAACACAAAGTCACCCAATACAAAGCTGGGAAGGCTTCCTTATTTGCTCAAGGTAAACGTCGTTATGACCGTAAACAATCCGGTTACGGTGGTCAAACCAAACCAGTCTTCCACAAAAAGGCTAAAACTACCAAAAAGGTTGTCTTACGTTTAGAATGTGTTGTTTGCAAAACCAAAGCTCAATTATCATTGAAACGTTGTAAACACTTTGAATTAGGTGGTGACAGAAAACAAAAAGGTCAAGCTTTACAATTCTAA	151		151	GGTGGTCAAACCAAA	VALID	CCA	Proline
yHMPu5000035267_wickerhamomyces_lynferdii_170307_g009084.m1	4236	ATGGTCAACGTTCCAAAAACCAGAAAAACCTACTGTAAAGGTAAAGAGTGTAGAAAGCACACTCAACACAAAGTTACCCAATACAAAGCTGGTAAAGCTTCTTTATTCGCTCAAGGTAAACGTCGTTATGACCGTAAACAATCCGGTTACGGTGGTCAAACCAAACCAGTCTTCCACAAAAAGGCTAAAACTACCAAGAAAGTTGTTTTACGTTTAGAATGTGTTGTCTGTAAGACCAAGGCTCAATTATCTTTGAAACGTTGTAAACATTTCGAATTGGGTGGTGACAGAAAACAAAAAGGTCAAGCTTTACAATTCTAA	ATGGTCAACGTTCCAAAAACCAGAAAAACCTACTGTAAAGGTAAAGAGTGTAGAAAGCACACTCAACACAAAGTTACCCAATACAAAGCTGGTAAAGCTTCTTTATTCGCTCAAGGTAAACGTCGTTATGACCGTAAACAATCCGGTTACGGTGGTCAAACCAAACCAGTCTTCCACAAAAAGGCTAAAACTACCAAGAAAGTTGTTTTACGTTTAGAATGTGTTGTCTGTAAGACCAAGGCTCAATTATCTTTGAAACGTTGTAAACATTTCGAATTGGGTGGTGACAGAAAACAAAAAGGTCAAGCTTTACAATTCTAA	151		151	GGTGGTCAAACCAAA	VALID	CCA	Proline
yHMPu5000035267_wickerhamomyces_lynferdii_170307_g005879.m1	4236	ATGGTCAACGTTCCAAAAACCAGAAAAACCTACTGTAAAGGTAAAGAGTGTAGAAAGCACACTCAACACAAAGTTACCCAATACAAAGCTGGTAAAGCTTCTTTATTCGCTCAAGGTAAACGTCGTTATGACCGTAAACAATCCGGTTACGGTGGTCAAACCAAACCAGTCTTCCATAAAAAGGCTAAAACTACCAAGAAAGTTGTTTTACGTTTAGAATGTGTTGTCTGTAAGACCAAAGCTCAATTATCTTTGAAACGTTGTAAACATTTCGAATTGGGTGGTGACAGAAAACAAAAAGGTCAAGCTTTACAATTCTAA	ATGGTCAACGTTCCAAAAACCAGAAAAACCTACTGTAAAGGTAAAGAGTGTAGAAAGCACACTCAACACAAAGTTACCCAATACAAAGCTGGTAAAGCTTCTTTATTCGCTCAAGGTAAACGTCGTTATGACCGTAAACAATCCGGTTACGGTGGTCAAACCAAACCAGTCTTCCATAAAAAGGCTAAAACTACCAAGAAAGTTGTTTTACGTTTAGAATGTGTTGTCTGTAAGACCAAAGCTCAATTATCTTTGAAACGTTGTAAACATTTCGAATTGGGTGGTGACAGAAAACAAAAAGGTCAAGCTTTACAATTCTAA	151		151	GGTGGTCAAACCAAA	VALID	CCA	Proline
yHMPu5000035271_wickerhamomyces_bovis_160928_g005326.m1	4236	ATGGTTAACGTTCCAAAAACTAGAAAGACCTACTGTAAGGGTAAAGAATGTCGTAAGCACACTCAACACAAAGTTACCCAATACAAAGCCGGTAAAGCTTCCTTATTTGCTCAAGGTAAACGTCGTTATGACCGTAAACAATCCGGTTACGGTGGTCAAACCAAACCAGTCTTCCACAAAAAGGCTAAAACCACCAAAAAGGTTGTTTTACGTTTAGAATGTGTTGTTTGCAAAACCAAAGCTCAATTATCATTGAAACGTTGTAAACATTTTGAATTAGGTGGTGACAGAAAACAAAAAGGTCAAGCTTTACAATTCTAA	ATGGTTAACGTTCCAAAAACTAGAAAGACCTACTGTAAGGGTAAAGAATGTCGTAAGCACACTCAACACAAAGTTACCCAATACAAAGCCGGTAAAGCTTCCTTATTTGCTCAAGGTAAACGTCGTTATGACCGTAAACAATCCGGTTACGGTGGTCAAACCAAACCAGTCTTCCACAAAAAGGCTAAAACCACCAAAAAGGTTGTTTTACGTTTAGAATGTGTTGTTTGCAAAACCAAAGCTCAATTATCATTGAAACGTTGTAAACATTTTGAATTAGGTGGTGACAGAAAACAAAAAGGTCAAGCTTTACAATTCTAA	151		151	GGTGGTCAAACCAAA	VALID	CCA	Proline
yHMPu5000037905_candida_odintsovae_180604_g001290.m1	4236	ATGGTTAACGTTCCAAAAACTAGAAAGACCTACTGTAAGGGTAAAGAATGTCGTAAGCACACTCAACACAAAGTCACCCAATACAAAGCTGGTAAAGCTTCCTTATTTGCCCAAGGTAAACGTCGTTATGACCGTAAACAATCCGGTTACGGTGGTCAAACCAAACCAGTCTTCCACAAAAAGGCTAAAACTACCAAAAAGGTTGTTTTACGTTTAGAATGTGTTGTTTGCAAAACCAAAGCTCAATTATCATTGAAACGTTGTAAGCACTTTGAATTAGGTGGTGACAGAAAACAAAAAGGTCAAGCTTTACAATTCTAA	ATGGTTAACGTTCCAAAAACTAGAAAGACCTACTGTAAGGGTAAAGAATGTCGTAAGCACACTCAACACAAAGTCACCCAATACAAAGCTGGTAAAGCTTCCTTATTTGCCCAAGGTAAACGTCGTTATGACCGTAAACAATCCGGTTACGGTGGTCAAACCAAACCAGTCTTCCACAAAAAGGCTAAAACTACCAAAAAGGTTGTTTTACGTTTAGAATGTGTTGTTTGCAAAACCAAAGCTCAATTATCATTGAAACGTTGTAAGCACTTTGAATTAGGTGGTGACAGAAAACAAAAAGGTCAAGCTTTACAATTCTAA	151		151	GGTGGTCAAACCAAA	VALID	CCA	Proline
yHMPu5000038347_candida_yuanshanica_170713_g003756.m1	4236	ATGGTTAACGTTCCAAAAACTAGAAAGACCTACTGTAAAGGTAAAGAATGTCGTAAGCACACTCAACACAAAGTTACCCAATACAAAGCTGGTAAAGCTTCTTTATTTGCTCAAGGTAAACGTCGTTATGACCGTAAACAATCCGGTTATGGTGGTCAAACCAAACCAGTCTTCCACAAAAAGGCTAAAACTACCAAAAAAGTTGTTTTACGTTTAGAATGTGTTGTTTGCAAAACCAAAGCTCAATTATCATTGAAACGTTGTAAACATTTTGAATTAGGTGGTGACAGAAAACAAAAAGGTCAAGCTTTACAATTCTAA	ATGGTTAACGTTCCAAAAACTAGAAAGACCTACTGTAAAGGTAAAGAATGTCGTAAGCACACTCAACACAAAGTTACCCAATACAAAGCTGGTAAAGCTTCTTTATTTGCTCAAGGTAAACGTCGTTATGACCGTAAACAATCCGGTTATGGTGGTCAAACCAAACCAGTCTTCCACAAAAAGGCTAAAACTACCAAAAAAGTTGTTTTACGTTTAGAATGTGTTGTTTGCAAAACCAAAGCTCAATTATCATTGAAACGTTGTAAACATTTTGAATTAGGTGGTGACAGAAAACAAAAAGGTCAAGCTTTACAATTCTAA	151		151	GGTGGTCAAACCAAA	VALID	CCA	Proline
yHMPu5000038396_candida_dajiaensis_170713_g003530.m1	4236	ATGGTTAACGTTCCAAAAACTAGAAAGACCTACTGTAAGGGTAAAGAATGTCGTAAGCACACTCAACACAAAGTTACCCAATACAAAGCTGGTAAAGCTTCCTTATTTGCTCAAGGTAAACGTCGTTATGACCGTAAACAATCCGGTTACGGTGGTCAAACCAAACCAGTCTTCCACAAAAAGGCTAAAACCACCAAAAAGGTTGTCTTACGTTTAGAATGTGTTGTTTGCAAAACCAAAGCTCAATTATCATTGAAACGTTGTAAGCACTTTGAATTAGGTGGTGACAGAAAACAAAAAGGTCAAGCTTTACAATTCTAA	ATGGTTAACGTTCCAAAAACTAGAAAGACCTACTGTAAGGGTAAAGAATGTCGTAAGCACACTCAACACAAAGTTACCCAATACAAAGCTGGTAAAGCTTCCTTATTTGCTCAAGGTAAACGTCGTTATGACCGTAAACAATCCGGTTACGGTGGTCAAACCAAACCAGTCTTCCACAAAAAGGCTAAAACCACCAAAAAGGTTGTCTTACGTTTAGAATGTGTTGTTTGCAAAACCAAAGCTCAATTATCATTGAAACGTTGTAAGCACTTTGAATTAGGTGGTGACAGAAAACAAAAAGGTCAAGCTTTACAATTCTAA	151		151	GGTGGTCAAACCAAA	VALID	CCA	Proline
yHQL14_Wickerhamomyces_sp_nov_plate33_MASURCA_g003771.m1	4236	ATGGTTAACGTTCCAAAAACTAGAAAGACCTACTGTAAGGGTAAAGAATGTCGTAAGCACACTCAACACAAAGTCACCCAATACAAAGCTGGGAAGGCTTCCTTATTTGCTCAAGGTAAACGTCGTTATGACCGTAAACAATCCGGTTACGGTGGTCAAACCAAACCAGTCTTCCACAAAAAGGCTAAAACTACCAAAAAGGTTGTCTTACGTTTAGAATGTGTTGTTTGCAAAACCAAAGCTCAATTATCATTGAAACGTTGTAAACACTTTGAATTAGGTGGTGACAGAAAACAAAAAGGTCAAGCTTTACAATTCTAA	ATGGTTAACGTTCCAAAAACTAGAAAGACCTACTGTAAGGGTAAAGAATGTCGTAAGCACACTCAACACAAAGTCACCCAATACAAAGCTGGGAAGGCTTCCTTATTTGCTCAAGGTAAACGTCGTTATGACCGTAAACAATCCGGTTACGGTGGTCAAACCAAACCAGTCTTCCACAAAAAGGCTAAAACTACCAAAAAGGTTGTCTTACGTTTAGAATGTGTTGTTTGCAAAACCAAAGCTCAATTATCATTGAAACGTTGTAAACACTTTGAATTAGGTGGTGACAGAAAACAAAAAGGTCAAGCTTTACAATTCTAA	151		151	GGTGGTCAAACCAAA	VALID	CCA	Proline
yHQL14_Wickerhamomyces_sp_nov_plate33_MASURCA_g002827.m1	4236	ATGGTTAACGTTCCAAAAACTAGAAAGACCTACTGTAAGGGTAAAGAATGTCGTAAGCACACTCAACACAAAGTCACCCAATACAAAGCTGGTAAGGCTTCCTTATTTGCTCAAGGTAAACGTCGTTATGACCGTAAACAATCCGGTTACGGTGGTCAAACCAAACCAGTCTTCCACAAAAAGGCTAAAACTACCAAAAAGGTTGTCTTACGTTTAGAATGTGTTGTTTGCAAAACCAAAGCTCAATTATCATTGAAACGTTGTAAACACTTTGAATTAGGTGGTGACAGAAAACAAAAAGGTCAAGCTTTACAATTCTAA	ATGGTTAACGTTCCAAAAACTAGAAAGACCTACTGTAAGGGTAAAGAATGTCGTAAGCACACTCAACACAAAGTCACCCAATACAAAGCTGGTAAGGCTTCCTTATTTGCTCAAGGTAAACGTCGTTATGACCGTAAACAATCCGGTTACGGTGGTCAAACCAAACCAGTCTTCCACAAAAAGGCTAAAACTACCAAAAAGGTTGTCTTACGTTTAGAATGTGTTGTTTGCAAAACCAAAGCTCAATTATCATTGAAACGTTGTAAACACTTTGAATTAGGTGGTGACAGAAAACAAAAAGGTCAAGCTTTACAATTCTAA	151		151	GGTGGTCAAACCAAA	VALID	CCA	Proline
yHMPu5000035045_barnettozyma_hawaiiensis_160613_g002020.m1	4236	ATGGTTAACGTTCCAAAGACCAGAAAGACCTACTGCAAGGGTAAGGAGTGCCGTAAGCACACCCAACACAAGGTTACCCAATACAAGGCTGGTAAGGCCTCCTTGTTCGCCCAGGGTAAGAGACGTTACGACCGTAAGCAATCCGGTTACGGTGGTCAAACCAAGCCAGTTTTCCATAAGAAGGCTAAGACTACCAAGAAGGTTGTCTTGCGTTTGGAGTGTGTTGTCTGCAAGACCAGAGCCCAATTGTCCTTGAAGCGTTGTAAGCACTTTGAATTGGGTGGTGACAGAAAGCAAAAGGGTCAAGCTTTGCAATTCTAA	ATGGTTAACGTTCCAAAGACCAGAAAGACCTACTGCAAGGGTAAGGAGTGCCGTAAGCACACCCAACACAAGGTTACCCAATACAAGGCTGGTAAGGCCTCCTTGTTCGCCCAGGGTAAGAGACGTTACGACCGTAAGCAATCCGGTTACGGTGGTCAAACCAAGCCAGTTTTCCATAAGAAGGCTAAGACTACCAAGAAGGTTGTCTTGCGTTTGGAGTGTGTTGTCTGCAAGACCAGAGCCCAATTGTCCTTGAAGCGTTGTAAGCACTTTGAATTGGGTGGTGACAGAAAGCAAAAGGGTCAAGCTTTGCAATTCTAA	151		151	GGTGGTCAAACCAAG	VALID	CCA	Proline
yHMPu5000035046_barnettozyma_populi_160613_g003501.m1	4236	ATGGTTAACGTTCCAAAGACCAGAAAGACCTACTGCAAGGGTAAGGAGTGCCGTAAGCACACCCAACACAAGGTTACCCAGTACAAGGCTGGTAAGGCCTCTTTGTTCGCCCAAGGTAAGAGACGTTATGACCGTAAGCAATCCGGTTACGGTGGTCAAACCAAGCCAGTCTTCCACAAGAAAGCTAAGACTACCAAGAAGGTTGTTTTGCGTTTGGAGTGTGTTGTCTGCAAGACCAGAGCTCAATTGTCTTTGAAGCGTTGTAAGCACTTCGAATTGGGTGGTGACAGAAAGCAAAAGGGTCAAGCTTTGCAATTCTAA	ATGGTTAACGTTCCAAAGACCAGAAAGACCTACTGCAAGGGTAAGGAGTGCCGTAAGCACACCCAACACAAGGTTACCCAGTACAAGGCTGGTAAGGCCTCTTTGTTCGCCCAAGGTAAGAGACGTTATGACCGTAAGCAATCCGGTTACGGTGGTCAAACCAAGCCAGTCTTCCACAAGAAAGCTAAGACTACCAAGAAGGTTGTTTTGCGTTTGGAGTGTGTTGTCTGCAAGACCAGAGCTCAATTGTCTTTGAAGCGTTGTAAGCACTTCGAATTGGGTGGTGACAGAAAGCAAAAGGGTCAAGCTTTGCAATTCTAA	151		151	GGTGGTCAAACCAAG	VALID	CCA	Proline
yHMPu5000038111_barnettozyma_sucrosica_170912_g002934.m1	4236	ATGGTTAACGTTCCAAAGACCAGAAAGACCTACTGCAAGGGTAAGGAGTGCCGTAAGCACACCCAACACAAGGTTACCCAATACAAGGCTGGTAAGGCCTCCTTGTTCGCCCAAGGTAAGAGACGTTATGACCGTAAGCAATCCGGTTACGGTGGTCAAACCAAGCCAGTCTTCCACAAGAAAGCTAAGACCACCAAGAAGGTTGTCTTGCGTTTGGAGTGTGTTGTCTGCAAGACCAGAGCTCAATTGTCCTTGAAGCGTTGTAAGCACTTTGAATTGGGTGGTGACAGAAAGCAAAAGGGTCAAGCTTTGCAATTCTAA	ATGGTTAACGTTCCAAAGACCAGAAAGACCTACTGCAAGGGTAAGGAGTGCCGTAAGCACACCCAACACAAGGTTACCCAATACAAGGCTGGTAAGGCCTCCTTGTTCGCCCAAGGTAAGAGACGTTATGACCGTAAGCAATCCGGTTACGGTGGTCAAACCAAGCCAGTCTTCCACAAGAAAGCTAAGACCACCAAGAAGGTTGTCTTGCGTTTGGAGTGTGTTGTCTGCAAGACCAGAGCTCAATTGTCCTTGAAGCGTTGTAAGCACTTTGAATTGGGTGGTGACAGAAAGCAAAAGGGTCAAGCTTTGCAATTCTAA	151		151	GGTGGTCAAACCAAG	VALID	CCA	Proline
yHMPu5000038112_barnettozyma_vustinii_170912_g002956.m1	4236	ATGGTTAACGTTCCAAAGACCAGAAAGACCTACTGCAAGGGTAAGGAGTGCCGTAAGCACACCCAACACAAGGTTACCCAATACAAGGCTGGTAAGGCCTCCTTGTTCGCCCAAGGTAAGAGACGTTATGACCGTAAGCAATCCGGTTACGGTGGTCAAACCAAGCCAGTCTTCCACAAGAAAGCTAAGACTACCAAGAAGGTTGTCTTGCGTTTGGAGTGTGTTGTCTGCAAGACCAGAGCTCAATTGTCCTTGAAGCGTTGTAAGCACTTTGAATTGGGTGGTGACAGAAAGCAAAAGGGTCAAGCTTTGCAATTCTAA	ATGGTTAACGTTCCAAAGACCAGAAAGACCTACTGCAAGGGTAAGGAGTGCCGTAAGCACACCCAACACAAGGTTACCCAATACAAGGCTGGTAAGGCCTCCTTGTTCGCCCAAGGTAAGAGACGTTATGACCGTAAGCAATCCGGTTACGGTGGTCAAACCAAGCCAGTCTTCCACAAGAAAGCTAAGACTACCAAGAAGGTTGTCTTGCGTTTGGAGTGTGTTGTCTGCAAGACCAGAGCTCAATTGTCCTTGAAGCGTTGTAAGCACTTTGAATTGGGTGGTGACAGAAAGCAAAAGGGTCAAGCTTTGCAATTCTAA	151		151	GGTGGTCAAACCAAG	VALID	CCA	Proline
yHMPu5000038351_candida_sanyiensis_170713_g004526.m1	4236	ATGGTTAACGTTCCAAAGACCAGAAAGACCTACTGCAAGGGTAAGGAGTGCCGCAAGCACACTCAACACAAGGTTACCCAATACAAGGCTGGTAAGGCCTCCTTGTTCGCCCAAGGTAAGAGACGTTATGACCGTAAGCAATCCGGTTACGGTGGTCAAACCAAGCCTGTCTTCCACAAGAAGGCTAAGACTACCAAGAAGGTTGTCTTGAGATTGGAGTGTGTCGTCTGCAAGACCAGAGCTCAGTTGTCTTTGAAGAGATGTAAGCACTTCGAGTTGGGTGGTGACAGAAAGCAAAAGGGTCAAGCTTTGCAATTCTAA	ATGGTTAACGTTCCAAAGACCAGAAAGACCTACTGCAAGGGTAAGGAGTGCCGCAAGCACACTCAACACAAGGTTACCCAATACAAGGCTGGTAAGGCCTCCTTGTTCGCCCAAGGTAAGAGACGTTATGACCGTAAGCAATCCGGTTACGGTGGTCAAACCAAGCCTGTCTTCCACAAGAAGGCTAAGACTACCAAGAAGGTTGTCTTGAGATTGGAGTGTGTCGTCTGCAAGACCAGAGCTCAGTTGTCTTTGAAGAGATGTAAGCACTTCGAGTTGGGTGGTGACAGAAAGCAAAAGGGTCAAGCTTTGCAATTCTAA	151		151	GGTGGTCAAACCAAG	VALID	CCT	Proline
yHDO593_barnettozyma_sp_180604_g004228.m1	4236	ATGGTTAACGTTCCAAAAACCAGAAAGACCTACTGCAAGGGTAAGGAGTGCCGCAAGCACACTCAACACAAGGTTACGCAATACAAGGCCGGTAAGGCCTCCTTGTTTGCCCAAGGTAAGAGACGTTATGACCGTAAACAATCCGGTTACGGTGGTCAAACCAAGCCAGTTTTCCATAAGAAAGCTAAGACTACCAAGAAGGTTGTCTTGCGTTTGGAATGTGTTGTCTGTAAGACCAGAGCCCAATTGTCCTTGAAGCGTTGTAAGCACTTTGAGTTGGGTGGTGACAAGAAGCAAAAGGGTCAAGCTTTGCAATTCTAA	ATGGTTAACGTTCCAAAAACCAGAAAGACCTACTGCAAGGGTAAGGAGTGCCGCAAGCACACTCAACACAAGGTTACGCAATACAAGGCCGGTAAGGCCTCCTTGTTTGCCCAAGGTAAGAGACGTTATGACCGTAAACAATCCGGTTACGGTGGTCAAACCAAGCCAGTTTTCCATAAGAAAGCTAAGACTACCAAGAAGGTTGTCTTGCGTTTGGAATGTGTTGTCTGTAAGACCAGAGCCCAATTGTCCTTGAAGCGTTGTAAGCACTTTGAGTTGGGTGGTGACAAGAAGCAAAAGGGTCAAGCTTTGCAATTCTAA	151		151	GGTGGTCAAACCAAG	VALID	CCA	Proline
yHMPu5000035047_barnettozyma_pratensis_160519_g001695.m1	4236	ATGGTTAACGTTCCAAAAACCAGAAAAACCTACTGTAAAGGTAAAGAATGTCGTAAGCACACTCAACACAAAGTTACCCAATACAAAGCTGGTAAAGCCTCATTATTTGCTCAAGGTAAAAGACGTTATGACCGTAAACAATCCGGTTACGGTGGTCAAACCAAACCAGTCTTCCACAAAAAGGCTAAAACTACCAAGAAAGTTGTCTTACGTTTAGAATGTGTTGTCTGTAAAACCAGAGCTCAATTATCATTAAAACGTTGTAAACATTTTGAATTAGGTGGTGACAAAAAACAAAAAGGTCAAGCTTTACAATTTTAG	ATGGTTAACGTTCCAAAAACCAGAAAAACCTACTGTAAAGGTAAAGAATGTCGTAAGCACACTCAACACAAAGTTACCCAATACAAAGCTGGTAAAGCCTCATTATTTGCTCAAGGTAAAAGACGTTATGACCGTAAACAATCCGGTTACGGTGGTCAAACCAAACCAGTCTTCCACAAAAAGGCTAAAACTACCAAGAAAGTTGTCTTACGTTTAGAATGTGTTGTCTGTAAAACCAGAGCTCAATTATCATTAAAACGTTGTAAACATTTTGAATTAGGTGGTGACAAAAAACAAAAAGGTCAAGCTTTACAATTTTAG	151		151	GGTGGTCAAACCAAA	VALID	CCA	Proline
yHMPu5000038364_Candida_qinlingensis_SPADES_g004333.m1	4236	ATGGTTAACGTTCCAAAAACCAGAAAAACCTACTGTAAAGGTAAAGAATGTCGTAAGCACACTCAACACAAAGTTACCCAGTACAAAGCTGGTAAAGCCTCATTATTTGCTCAAGGTAAAAGACGTTATGACCGTAAACAATCCGGTTACGGTGGTCAAACCAAACCAGTCTTCCACAAAAAGGCTAAAACTACCAAGAAAGTTGTCTTGCGTTTAGAATGTGTTGTCTGTAAAACCAGAGCTCAATTATCATTAAAACGTTGTAAACATTTTGAATTAGGTGGTGACAAAAAACAAAAAGGTCAAGCTTTACAATTTTAG	ATGGTTAACGTTCCAAAAACCAGAAAAACCTACTGTAAAGGTAAAGAATGTCGTAAGCACACTCAACACAAAGTTACCCAGTACAAAGCTGGTAAAGCCTCATTATTTGCTCAAGGTAAAAGACGTTATGACCGTAAACAATCCGGTTACGGTGGTCAAACCAAACCAGTCTTCCACAAAAAGGCTAAAACTACCAAGAAAGTTGTCTTGCGTTTAGAATGTGTTGTCTGTAAAACCAGAGCTCAATTATCATTAAAACGTTGTAAACATTTTGAATTAGGTGGTGACAAAAAACAAAAAGGTCAAGCTTTACAATTTTAG	151		151	GGTGGTCAAACCAAA	VALID	CCA	Proline
yHMPu5000035048_Barnettozyma_salicaria_SPADES_g000453.m1	4236	ATGGTTAACGTCCCAAAAACCAGAAGAACTTACTGTAAAGGTAAAGAATGTCGTAAGCACACTCAACACAAAGTTACCCAATACAAAGCTGGTAAAGCCTCCTTATTTGCCCAAGGTAAAAGACGTTATGACCGTAAACAATCCGGTTACGGTGGTCAAACCAAACCAGTCTTCCATAAAAAGGCTAAGACTACCAAAAAGGTTGTTTTACGTTTAGAATGTGTTGTCTGCAAAACCAGAGCTCAATTATCATTGAAACGTTGTAAACATTTTGAATTAGGTGGTGACAAAAAACAAAAAGGTCAAGCTTTACAATTTTAG	ATGGTTAACGTCCCAAAAACCAGAAGAACTTACTGTAAAGGTAAAGAATGTCGTAAGCACACTCAACACAAAGTTACCCAATACAAAGCTGGTAAAGCCTCCTTATTTGCCCAAGGTAAAAGACGTTATGACCGTAAACAATCCGGTTACGGTGGTCAAACCAAACCAGTCTTCCATAAAAAGGCTAAGACTACCAAAAAGGTTGTTTTACGTTTAGAATGTGTTGTCTGCAAAACCAGAGCTCAATTATCATTGAAACGTTGTAAACATTTTGAATTAGGTGGTGACAAAAAACAAAAAGGTCAAGCTTTACAATTTTAG	151		151	GGTGGTCAAACCAAA	VALID	CCA	Proline
yHMPu5000026054_candida_pseudorugosa_170713_g003239.m1	4236	ATGGTCAACGTTCCCAAGACTAGAAAGACTTACTGCAAGGGTAAGGAGTGCCGCAAGCACACCCAGCACAAGGTTACTCAATACAAGGCGGGTAAGGCTTCGCTCTTCGCCCAAGGTAAGAGACGTTACGACCGTAAGCAATCCGGTTACGGTGGTCAAACCAAGCCCGTTTTCCACAAGAAGGCTAAGACTACCAAGAAGGTCGTCTTGAGATTGGAATGTGTCGTTTGCAAGACCAAGGCTCAACTTTCGTTGAAGAGATGCAAGCACTTCGAATTGGGTGGTGACAAGAAGCAAAAGGGGCAAGCTTTGCAATTCTAG	ATGGTCAACGTTCCCAAGACTAGAAAGACTTACTGCAAGGGTAAGGAGTGCCGCAAGCACACCCAGCACAAGGTTACTCAATACAAGGCGGGTAAGGCTTCGCTCTTCGCCCAAGGTAAGAGACGTTACGACCGTAAGCAATCCGGTTACGGTGGTCAAACCAAGCCCGTTTTCCACAAGAAGGCTAAGACTACCAAGAAGGTCGTCTTGAGATTGGAATGTGTCGTTTGCAAGACCAAGGCTCAACTTTCGTTGAAGAGATGCAAGCACTTCGAATTGGGTGGTGACAAGAAGCAAAAGGGGCAAGCTTTGCAATTCTAG	151		151	GGTGGTCAAACCAAG	VALID	CCC	Proline
yHMPu5000034596_candida_sp_160613_g001762.m1	4236	ATGGTGAACGTTCCAAAAACTAGAAAAACCTACTGCAAAGGTAAAGAATGTCGTAAGCACACTCAACACAAAGTTACTCAATACAAAGCTGGTAAAGCATCTTTATTTGCTCAAGGTAAACGTCGTTATGACCGTAAACAAAGTGGTTACGGTGGTCAAACCAAACCAGTTTTCCACAAAAAGGCTAAAACCACCAAAAAGGTTGTTTTGCGTTTAGAATGTGTTGTCTGCAAAACCAAAGCTCAATTATCATTGAAACGTTGTAAACATTTTGAATTAGGTGGTGACAAAAAACAAAAAGGTCAAGCTTTACAATTCTAA	ATGGTGAACGTTCCAAAAACTAGAAAAACCTACTGCAAAGGTAAAGAATGTCGTAAGCACACTCAACACAAAGTTACTCAATACAAAGCTGGTAAAGCATCTTTATTTGCTCAAGGTAAACGTCGTTATGACCGTAAACAAAGTGGTTACGGTGGTCAAACCAAACCAGTTTTCCACAAAAAGGCTAAAACCACCAAAAAGGTTGTTTTGCGTTTAGAATGTGTTGTCTGCAAAACCAAAGCTCAATTATCATTGAAACGTTGTAAACATTTTGAATTAGGTGGTGACAAAAAACAAAAAGGTCAAGCTTTACAATTCTAA	151		151	GGTGGTCAAACCAAA	VALID	CCA	Proline
yHMPu5000034597_candida_stellimalicola_180604_g000412.m1	4236	ATGGTGAACGTTCCAAAAACTAGAAAAACCTACTGTAAAGGTAAAGAATGTCGTAAGCACACTCAACACAAAGTTACTCAATACAAAGCTGGTAAAGCATCTTTATTTGCTCAAGGTAAACGTCGTTATGACCGTAAACAAAGTGGTTACGGTGGTCAAACCAAACCAGTTTTCCACAAAAAGGCTAAAACCACCAAAAAGGTTGTTTTGCGTTTAGAATGTGTTGTCTGCAAAACCAAGGCTCAATTGTCATTGAAACGTTGTAAACATTTTGAATTAGGTGGTGACAAAAAACAAAAAGGTCAAGCTTTACAATTCTAA	ATGGTGAACGTTCCAAAAACTAGAAAAACCTACTGTAAAGGTAAAGAATGTCGTAAGCACACTCAACACAAAGTTACTCAATACAAAGCTGGTAAAGCATCTTTATTTGCTCAAGGTAAACGTCGTTATGACCGTAAACAAAGTGGTTACGGTGGTCAAACCAAACCAGTTTTCCACAAAAAGGCTAAAACCACCAAAAAGGTTGTTTTGCGTTTAGAATGTGTTGTCTGCAAAACCAAGGCTCAATTGTCATTGAAACGTTGTAAACATTTTGAATTAGGTGGTGACAAAAAACAAAAAGGTCAAGCTTTACAATTCTAA	151		151	GGTGGTCAAACCAAA	VALID	CCA	Proline
yHMPu5000034602_starmera_pachycereana_170307_g000113.m1	4236	ATGGTTAACGTTCCAAAAACTAGAAAAACCTACTGCAAAGGTAAAGAGTGTCGTAAACACACCCAACACAAAGTCACCCAATACAAAGCCGGTAAAGCTTCTCTGTTTGCTCAAGGTAAAAGACGTTATGACCGTAAACAAAGTGGTTACGGTGGTCAAACCAAACCAGTTTTCCATAAAAAAGCTAAAACTACCAAAAAAGTTGTTTTACGTTTAGAATGTGTTGTCTGTAAAACTAAAGCTCAATTATCCTTGAAACGTTGTAAACATTTTGAATTAGGTGGTGACAAAAAACAAAAAGGTCAAGCTTTACAATTTTAA	ATGGTTAACGTTCCAAAAACTAGAAAAACCTACTGCAAAGGTAAAGAGTGTCGTAAACACACCCAACACAAAGTCACCCAATACAAAGCCGGTAAAGCTTCTCTGTTTGCTCAAGGTAAAAGACGTTATGACCGTAAACAAAGTGGTTACGGTGGTCAAACCAAACCAGTTTTCCATAAAAAAGCTAAAACTACCAAAAAAGTTGTTTTACGTTTAGAATGTGTTGTCTGTAAAACTAAAGCTCAATTATCCTTGAAACGTTGTAAACATTTTGAATTAGGTGGTGACAAAAAACAAAAAGGTCAAGCTTTACAATTTTAA	151		151	GGTGGTCAAACCAAA	VALID	CCA	Proline
yHMPu5000034971_candida_sp_160519_g001562.m1	4236	ATGGTTAACGTCCCAAAGACCAGAAAGACTTATTGCAAGGGTAAGGAGTGCCGCAAGCACACCCAGCACAAGGTTACTCAGTACAAGGCTGGTAAGGCTTCCTTGTTTGCCCAGGGTAAGCGTCGTTACGACCGTAAGCAGTCCGGTTACGGTGGTCAGACCAAGCCAGTTTTCCACAAGAAGGCTAAGACCACCAAGAAGGTTGTCTTGAGATTGGAGTGTGTTGTTTGCAAGACCAAGGCTCAGCTTTCCTTGAAGAGATGTAAGCACTTCGAGCTTGGTGGTGACAAGAAGCAGAAGGGTCAGGCTTTGCAGTTCTAA	ATGGTTAACGTCCCAAAGACCAGAAAGACTTATTGCAAGGGTAAGGAGTGCCGCAAGCACACCCAGCACAAGGTTACTCAGTACAAGGCTGGTAAGGCTTCCTTGTTTGCCCAGGGTAAGCGTCGTTACGACCGTAAGCAGTCCGGTTACGGTGGTCAGACCAAGCCAGTTTTCCACAAGAAGGCTAAGACCACCAAGAAGGTTGTCTTGAGATTGGAGTGTGTTGTTTGCAAGACCAAGGCTCAGCTTTCCTTGAAGAGATGTAAGCACTTCGAGCTTGGTGGTGACAAGAAGCAGAAGGGTCAGGCTTTGCAGTTCTAA	#VALUE!	151	#VALUE!	#VALUE!	#VALUE!	#VALUE!	#VALUE!
yHMPu5000035005_lodderomyces_elongisporus_160519.haplomerger2_g002323.m1	4236	ATGGTGAACGTTCCAAAAACCAGAAAGACCTACTGTAAAGGTAAAGAATGTCGTAAACACACTCAACACAAAGTCACCCAATACAAAGCTGGTAAGGCTTCATTGTTTGCTCAAGGTAAGAGAAGATATGACAGGAAACAAAGTGGTTACGGTGGTCAAACTAAGCCAGTTTTCCACAAAAAGGCAAAGACTACCAAGAAGGTTGTTTTGAGATTGGAATGTGTTGTCTGTAAGACCAAGGCTCAATTGTCCTTGAAGAGATGTAAGCACTTCGAATTGGGTGGTGACAAGAAGCAAAAGGGTCAAGCTTTGCAATTCTAG	ATGGTGAACGTTCCAAAAACCAGAAAGACCTACTGTAAAGGTAAAGAATGTCGTAAACACACTCAACACAAAGTCACCCAATACAAAGCTGGTAAGGCTTCATTGTTTGCTCAAGGTAAGAGAAGATATGACAGGAAACAAAGTGGTTACGGTGGTCAAACTAAGCCAGTTTTCCACAAAAAGGCAAAGACTACCAAGAAGGTTGTTTTGAGATTGGAATGTGTTGTCTGTAAGACCAAGGCTCAATTGTCCTTGAAGAGATGTAAGCACTTCGAATTGGGTGGTGACAAGAAGCAAAAGGGTCAAGCTTTGCAATTCTAG	151		151	GGTGGTCAAACTAAG	VALID	CCA	Proline
yHMPu5000035019_candida_caryicola_160519_g000336.m1	4236	ATGGTTAACGTTCCAAAGACTAGAAAGACATACTGTAAGGGTAAGGAATGTCGCAAACACACCCAACACAAGGTCACCCAATACAAGGCTGGTAAGGCTTCCCTCTTTGCCCAAGGTAAGAGAAGATACGACCGTAAACAAAGTGGTTACGGTGGTCAAACCAAGCCAGTTTTCCACAAGAAGGCCAAGACTACCAAGAAGGTTGTCTTGAGATTGGAATGTGTTGTCTGCAAGACCAAGGCCCAATTATCGTTGAAGAGATGTAAGCACTTCGAATTAGGTGGTGACAAGAAGCAAAAGGGTCAAGCTTTGCAATTTTAA	ATGGTTAACGTTCCAAAGACTAGAAAGACATACTGTAAGGGTAAGGAATGTCGCAAACACACCCAACACAAGGTCACCCAATACAAGGCTGGTAAGGCTTCCCTCTTTGCCCAAGGTAAGAGAAGATACGACCGTAAACAAAGTGGTTACGGTGGTCAAACCAAGCCAGTTTTCCACAAGAAGGCCAAGACTACCAAGAAGGTTGTCTTGAGATTGGAATGTGTTGTCTGCAAGACCAAGGCCCAATTATCGTTGAAGAGATGTAAGCACTTCGAATTAGGTGGTGACAAGAAGCAAAAGGGTCAAGCTTTGCAATTTTAA	151		151	GGTGGTCAAACCAAG	VALID	CCA	Proline
yHMPu5000035258_wickerhamomyces_subpelliculosus_160928.haplomerger2_g002360.m1	4236	ATGGTTAACGTTCCAAAAACCAGAAAAACCTACTGTAAAGGTAAAGAGTGTCGTAAACACACCCAACACAAAGTTACCCAATACAAAGCTGGTAAAGCTTCTTTATTCGCTCAAGGTAAACGTCGTTATGACCGTAAACAATCCGGTTATGGTGGTCAAACAAAACCAGTTTTCCATAAAAAGGCTAAAACTACTAAAAAAGTTGTTTTACGTTTAGAATGTGTTGTTTGTAAAACAAAAGCTCAATTATCATTAAAACGTTGTAAACATTTTGAATTAGGTGGTGATAAAAAACAAAAAGGTCAAGCTTTACAATTTTAA	ATGGTTAACGTTCCAAAAACCAGAAAAACCTACTGTAAAGGTAAAGAGTGTCGTAAACACACCCAACACAAAGTTACCCAATACAAAGCTGGTAAAGCTTCTTTATTCGCTCAAGGTAAACGTCGTTATGACCGTAAACAATCCGGTTATGGTGGTCAAACAAAACCAGTTTTCCATAAAAAGGCTAAAACTACTAAAAAAGTTGTTTTACGTTTAGAATGTGTTGTTTGTAAAACAAAAGCTCAATTATCATTAAAACGTTGTAAACATTTTGAATTAGGTGGTGATAAAAAACAAAAAGGTCAAGCTTTACAATTTTAA	151		151	GGTGGTCAAACAAAA	VALID	CCA	Proline
yHMPu5000035262_candida_silvicultrix_170307_g003774.m1	4236	ATGGTCAACGTTCCAAAAACCAGAAAAACCTACTGTAAAGGTAAAGAGTGTAGAAAACACACTCAACACAAAGTTACCCAATACAAAGCTGGTAAAGCTTCATTATTCGCTCAAGGTAAACGTCGTTATGATCGTAAACAATCCGGTTACGGTGGTCAAACCAAACCAGTTTTCCACAAAAAGGCTAAAACTACCAAAAAAGTTGTTTTACGTTTAGAATGTGTTGTTTGTAAAACTAAAGCTCAATTATCTTTAAAACGTTGTAAACACTTTGAATTAGGTGGTGACAAGAAACAAAAAGGTCAAGCTTTACAATTCTAA	ATGGTCAACGTTCCAAAAACCAGAAAAACCTACTGTAAAGGTAAAGAGTGTAGAAAACACACTCAACACAAAGTTACCCAATACAAAGCTGGTAAAGCTTCATTATTCGCTCAAGGTAAACGTCGTTATGATCGTAAACAATCCGGTTACGGTGGTCAAACCAAACCAGTTTTCCACAAAAAGGCTAAAACTACCAAAAAAGTTGTTTTACGTTTAGAATGTGTTGTTTGTAAAACTAAAGCTCAATTATCTTTAAAACGTTGTAAACACTTTGAATTAGGTGGTGACAAGAAACAAAAAGGTCAAGCTTTACAATTCTAA	151		151	GGTGGTCAAACCAAA	VALID	CCA	Proline
yHMPu5000037256_cyberlindnera_galapagoensis_210210_g001843.m1	4236	ATGGTTAACGTTCCAAAGACCAGAAAGACCTACTGTAAGGGTAAGGAGTGCAGAAAGCACACTCAACACAAGGTCACCCAATACAAGGCCGGTAAGGCTTCCCTTTTCGCCCAAGGTAAGCGTCGTTATGACCGTAAGCAATCCGGTTACGGTGGTCAAACCAAGCCAGTTTTCCACAAGAAGGCTAAAACTACCAAGAAGGTTGTTTTGCGTTTGGAGTGTGTTGTCTGTAAGACCAAGGCTCAATTGTCCTTGAAGCGTTGTAAGCACTTCGAGTTGGGTGGTGACAAGAAGCAAAAGGGTCAAGCTTTGCAATTCTAA	ATGGTTAACGTTCCAAAGACCAGAAAGACCTACTGTAAGGGTAAGGAGTGCAGAAAGCACACTCAACACAAGGTCACCCAATACAAGGCCGGTAAGGCTTCCCTTTTCGCCCAAGGTAAGCGTCGTTATGACCGTAAGCAATCCGGTTACGGTGGTCAAACCAAGCCAGTTTTCCACAAGAAGGCTAAAACTACCAAGAAGGTTGTTTTGCGTTTGGAGTGTGTTGTCTGTAAGACCAAGGCTCAATTGTCCTTGAAGCGTTGTAAGCACTTCGAGTTGGGTGGTGACAAGAAGCAAAAGGGTCAAGCTTTGCAATTCTAA	151		151	GGTGGTCAAACCAAG	VALID	CCA	Proline
yHMPu5000037887_candida_rugosa_170713_g000483.m1	4236	ATGGTCAACGTTCCCAAGACTAGAAAGACTTACTGCAAGGGTAAGGAGTGCAGAAAGCACACCCAGCACAAGGTTACCCAATACAAGGCCGGTAAGGCTTCGCTCTTCGCCCAGGGTAAGAGACGTTACGACCGTAAGCAATCCGGTTACGGTGGTCAAACCAAGCCCGTTTTCCACAAGAAGGCCAAGACCACCAAGAAGGTTGTCTTGAGATTGGAATGTGTCGTGTGCAAGACCAAGGCTCAACTTTCGTTGAAGAGATGCAAGCACTTCGAATTGGGTGGTGACAAGAAGCAAAAGGGGCAAGCTTTGCAATTCTAG	ATGGTCAACGTTCCCAAGACTAGAAAGACTTACTGCAAGGGTAAGGAGTGCAGAAAGCACACCCAGCACAAGGTTACCCAATACAAGGCCGGTAAGGCTTCGCTCTTCGCCCAGGGTAAGAGACGTTACGACCGTAAGCAATCCGGTTACGGTGGTCAAACCAAGCCCGTTTTCCACAAGAAGGCCAAGACCACCAAGAAGGTTGTCTTGAGATTGGAATGTGTCGTGTGCAAGACCAAGGCTCAACTTTCGTTGAAGAGATGCAAGCACTTCGAATTGGGTGGTGACAAGAAGCAAAAGGGGCAAGCTTTGCAATTCTAG	151		151	GGTGGTCAAACCAAG	VALID	CCC	Proline
yHMPu5000038069_diutina_neorugosa_170912_g000147.m1	4236	ATGGTCAACGTTCCCAAGACTAGAAAGACTTACTGCAAGGGTAAGGAGTGCCGCAAGCACACCCAGCACAAGGTTACCCAATACAAGGCCGGTAAGGCCTCGCTCTTCGCCCAAGGTAAGAGACGTTACGACCGTAAGCAATCCGGTTACGGTGGTCAAACCAAGCCCGTGTTCCACAAGAAGGCTAAGACTACCAAGAAGGTTGTCTTGAGATTGGAATGTGTCGTTTGCAAGACCAAGGCTCAACTTTCGTTGAAGAGATGCAAGCACTTCGAATTGGGTGGTGACAAGAAGCAAAAGGGGCAAGCTTTGCAATTCTAG	ATGGTCAACGTTCCCAAGACTAGAAAGACTTACTGCAAGGGTAAGGAGTGCCGCAAGCACACCCAGCACAAGGTTACCCAATACAAGGCCGGTAAGGCCTCGCTCTTCGCCCAAGGTAAGAGACGTTACGACCGTAAGCAATCCGGTTACGGTGGTCAAACCAAGCCCGTGTTCCACAAGAAGGCTAAGACTACCAAGAAGGTTGTCTTGAGATTGGAATGTGTCGTTTGCAAGACCAAGGCTCAACTTTCGTTGAAGAGATGCAAGCACTTCGAATTGGGTGGTGACAAGAAGCAAAAGGGGCAAGCTTTGCAATTCTAG	151		151	GGTGGTCAAACCAAG	VALID	CCC	Proline
yHMPu5000038382_candida_mesorugosa_170713_g005664.m1	4236	ATGGTCAACGTTCCCAAGACTAGAAAGACTTACTGCAAGGGTAAGGAGTGCAGAAAGCACACCCAGCACAAGGTTACCCAATACAAGGCCGGTAAGGCTTCGCTCTTCGCCCAGGGTAAGAGACGTTACGACCGTAAGCAATCCGGTTACGGTGGTCAAACCAAGCCCGTTTTCCACAAGAAGGCCAAGACCACCAAGAAGGTTGTCTTGAGATTGGAATGTGTCGTGTGCAAGACCAAGGCTCAACTTTCGTTGAAGAGATGCAAGCACTTCGAATTGGGTGGTGACAAGAAGCAAAAGGGGCAAGCTTTGCAATTCTAG	ATGGTCAACGTTCCCAAGACTAGAAAGACTTACTGCAAGGGTAAGGAGTGCAGAAAGCACACCCAGCACAAGGTTACCCAATACAAGGCCGGTAAGGCTTCGCTCTTCGCCCAGGGTAAGAGACGTTACGACCGTAAGCAATCCGGTTACGGTGGTCAAACCAAGCCCGTTTTCCACAAGAAGGCCAAGACCACCAAGAAGGTTGTCTTGAGATTGGAATGTGTCGTGTGCAAGACCAAGGCTCAACTTTCGTTGAAGAGATGCAAGCACTTCGAATTGGGTGGTGACAAGAAGCAAAAGGGGCAAGCTTTGCAATTCTAG	151		151	GGTGGTCAAACCAAG	VALID	CCC	Proline
yHMPu5000026170_wickerhamomyces_silvicola_170307.haplomerger2_g002429.m1	4236	ATGGTTAACGTTCCAAAAACCAGAAGAACCTACTGTAAGGGTAAAGAGTGCCGTAAACACACCCAACACAAAGTTACCCAATACAAAGCTGGTAAAGCTTCTTTATTTGCTCAAGGTAAACGTCGTTATGACCGTAAACAATCCGGTTATGGTGGTCAAACTAAACCAGTCTTCCACAAAAAGGCTAAAACTACCAAAAAAGTTGTCTTACGTCTTGAATGTGTTGTCTGCAAAACCAAAGCTCAATTATCTTTAAAACGTTGTAAACATTTTGAATTAGGTGGTGATAAAAAACAAAAAGGTCAAGCTTTACAATTTTAA	ATGGTTAACGTTCCAAAAACCAGAAGAACCTACTGTAAGGGTAAAGAGTGCCGTAAACACACCCAACACAAAGTTACCCAATACAAAGCTGGTAAAGCTTCTTTATTTGCTCAAGGTAAACGTCGTTATGACCGTAAACAATCCGGTTATGGTGGTCAAACTAAACCAGTCTTCCACAAAAAGGCTAAAACTACCAAAAAAGTTGTCTTACGTCTTGAATGTGTTGTCTGCAAAACCAAAGCTCAATTATCTTTAAAACGTTGTAAACATTTTGAATTAGGTGGTGATAAAAAACAAAAAGGTCAAGCTTTACAATTTTAA	151		151	GGTGGTCAAACTAAA	VALID	CCA	Proline
yHMPu5000034980_cyberlindnera_lachancei_160519.haplomerger2_g001265.m1	4236	ATGGTTAACGTTCCAAAGACCAGAAGAACCTACTGTAAGGGTAAGGAGTGCAGAAAGCACACCCAACACAAGGTCACCCAGTACAAGGCTGGCAAGGCTTCTCTCTTCGCCCAAGGTAAGCGTCGTTATGACCGTAAACAATCCGGTTACGGTGGTCAAACCAAGCCAGTTTTCCATAAGAAGGCTAAGACTACCAAGAAGGTTGTCTTGCGTTTGGAGTGTGTTGTTTGCAAGACCAAGGCTCAATTGTCCTTGAAGCGTTGTAAGCACTTTGAGTTGGGTGGTGACAAGAAGCAAAAGGGTCAAGCTTTGCAATTTTAA	ATGGTTAACGTTCCAAAGACCAGAAGAACCTACTGTAAGGGTAAGGAGTGCAGAAAGCACACCCAACACAAGGTCACCCAGTACAAGGCTGGCAAGGCTTCTCTCTTCGCCCAAGGTAAGCGTCGTTATGACCGTAAACAATCCGGTTACGGTGGTCAAACCAAGCCAGTTTTCCATAAGAAGGCTAAGACTACCAAGAAGGTTGTCTTGCGTTTGGAGTGTGTTGTTTGCAAGACCAAGGCTCAATTGTCCTTGAAGCGTTGTAAGCACTTTGAGTTGGGTGGTGACAAGAAGCAAAAGGGTCAAGCTTTGCAATTTTAA	151		151	GGTGGTCAAACCAAG	VALID	CCA	Proline
yHMPu5000034998_cephaloascus_albidus_160519.haplomerger2_g000253.m1	4236	ATGGTCAACGTTCCAAAAACCAGAAGAACCTACTGTAAAGGTAAAGAATGTCGCAAACATACCCAACACAAGGTTACCCAATACAAAGCTGGTAAAGCTTCATTATTCGCTCAAGGGAAAAGAAGATATGATCGTAAACAATCAGGATATGGTGGTCAAACTAAACCAGTTTTCCATAAGAAAGCCAAGACTACAAAGAAAGTTGTGTTACGTCTTGAATGTGTTGTTTGTAAGACTAAGGCTCAATTATCTTTAAAAAGATGTAAACATTTTGAATTGGGTGGTGATAAGAAACAAAAAGGTCAAGCTTTACAATTTTAA	ATGGTCAACGTTCCAAAAACCAGAAGAACCTACTGTAAAGGTAAAGAATGTCGCAAACATACCCAACACAAGGTTACCCAATACAAAGCTGGTAAAGCTTCATTATTCGCTCAAGGGAAAAGAAGATATGATCGTAAACAATCAGGATATGGTGGTCAAACTAAACCAGTTTTCCATAAGAAAGCCAAGACTACAAAGAAAGTTGTGTTACGTCTTGAATGTGTTGTTTGTAAGACTAAGGCTCAATTATCTTTAAAAAGATGTAAACATTTTGAATTGGGTGGTGATAAGAAACAAAAAGGTCAAGCTTTACAATTTTAA	151		151	GGTGGTCAAACTAAA	VALID	CCA	Proline
yHMPu5000035261_candida_ponderosae_170307_g001424.m1	4236	ATGGTTAACGTTCCAAAAACTAGAAGAACCTACTGTAAGGGTAAGGAATGTCGTAAGCACACTCAACACAAAGTTACTCAATACAAGGCTGGTAAGGCTTCCTTATTCGCTCAAGGTAAGCGTCGTTATGACCGTAAACAATCCGGTTACGGTGGTCAAACCAAGCCAGTTTTCCACAAAAAGGCTAAGACTACCAAGAAGGTTGTCTTACGTTTAGAATGTGTTGTCTGTAAGACCAAGGCTCAATTATCATTAAAGCGTTGTAAGCATTTTGAATTAGGTGGTGATAAGAAACAAAAGGGTCAAGCTTTACAATTCTAA	ATGGTTAACGTTCCAAAAACTAGAAGAACCTACTGTAAGGGTAAGGAATGTCGTAAGCACACTCAACACAAAGTTACTCAATACAAGGCTGGTAAGGCTTCCTTATTCGCTCAAGGTAAGCGTCGTTATGACCGTAAACAATCCGGTTACGGTGGTCAAACCAAGCCAGTTTTCCACAAAAAGGCTAAGACTACCAAGAAGGTTGTCTTACGTTTAGAATGTGTTGTCTGTAAGACCAAGGCTCAATTATCATTAAAGCGTTGTAAGCATTTTGAATTAGGTGGTGATAAGAAACAAAAGGGTCAAGCTTTACAATTCTAA	151		151	GGTGGTCAAACCAAG	VALID	CCA	Proline
yHMPu5000035270_wickerhamomyces_chambardii_180604.haplomerger2_g001886.m1	4236	ATGGTTAACGTTCCAAAAACTAGAAGAACCTACTGTAAGGGTAAGGAATGTAGAAAGCATACCCAACACAAGGTTACCCAATACAAAGCTGGTAAGGCCTCTTTATTCGCTCAAGGTAAGCGTCGTTATGACCGTAAACAATCCGGTTACGGTGGTCAAACCAAACCAGTTTTCCACAAAAAGGCTAAAACTACTAAGAAAGTTGTCTTACGTTTGGAATGTGTTGTCTGTAAGACCAAGGCTCAATTATCATTAAAGAGATGTAAGCACTTTGAATTAGGTGGTGATAAGAAACAAAAAGGTCAAGCTTTACAATTTTAA	ATGGTTAACGTTCCAAAAACTAGAAGAACCTACTGTAAGGGTAAGGAATGTAGAAAGCATACCCAACACAAGGTTACCCAATACAAAGCTGGTAAGGCCTCTTTATTCGCTCAAGGTAAGCGTCGTTATGACCGTAAACAATCCGGTTACGGTGGTCAAACCAAACCAGTTTTCCACAAAAAGGCTAAAACTACTAAGAAAGTTGTCTTACGTTTGGAATGTGTTGTCTGTAAGACCAAGGCTCAATTATCATTAAAGAGATGTAAGCACTTTGAATTAGGTGGTGATAAGAAACAAAAAGGTCAAGCTTTACAATTTTAA	151		151	GGTGGTCAAACCAAA	VALID	CCA	Proline
yHMPu5000035273_wickerhamomyces_anomalus_180604.haplomerger2_g005025.m1	4236	ATGGTCAACGTCCCAAAAACCAGAAGAACCTACTGTAAAGGTAAAGAGTGTAGAAAACACACCCAACACAAAGTTACCCAATACAAAGCTGGTAAAGCTTCTTTATTTGCTCAAGGTAAACGTCGTTATGACCGTAAACAATCCGGTTATGGTGGTCAAACCAAACCAGTCTTCCACAAAAAGGCTAAAACTACCAAAAAAGTTGTTTTACGTTTAGAATGTGTTGTCTGTAAAACCAAAGCTCAATTATCATTAAAACGTTGTAAACATTTTGAATTAGGTGGTGATAAAAAACAAAAAGGTCAAGCTTTACAATTTTAA	ATGGTCAACGTCCCAAAAACCAGAAGAACCTACTGTAAAGGTAAAGAGTGTAGAAAACACACCCAACACAAAGTTACCCAATACAAAGCTGGTAAAGCTTCTTTATTTGCTCAAGGTAAACGTCGTTATGACCGTAAACAATCCGGTTATGGTGGTCAAACCAAACCAGTCTTCCACAAAAAGGCTAAAACTACCAAAAAAGTTGTTTTACGTTTAGAATGTGTTGTCTGTAAAACCAAAGCTCAATTATCATTAAAACGTTGTAAACATTTTGAATTAGGTGGTGATAAAAAACAAAAAGGTCAAGCTTTACAATTTTAA	151		151	GGTGGTCAAACCAAA	VALID	CCA	Proline
yHMPu5000037207_Wickerhamomyces_kurtzmanii_SPADES_g003129.m1	4236	ATGGTTAACGTTCCAAAAACTAGAAGAACTTACTGTAAAGGTAAAGAATGTCGTAAACATACTCAACACAAAGTTACTCAATACAAAGCCGGTAAAGCTTCTTTATTTGCTCAAGGTAAACGTCGTTATGATCGTAAACAATCCGGTTACGGTGGTCAAACTAAACCAGTTTTTCACAAAAAAGCTAAAACTACTAAAAAAGTTGTCTTACGTTTAGAATGTGTTGTTTGTAAAACTAAAGCACAATTGTCTTTAAAACGTTGTAAACATTTTGAATTAGGTGGTGACAAAAAACAAAAAGGTCAAGCTTTACAATTTTAA	ATGGTTAACGTTCCAAAAACTAGAAGAACTTACTGTAAAGGTAAAGAATGTCGTAAACATACTCAACACAAAGTTACTCAATACAAAGCCGGTAAAGCTTCTTTATTTGCTCAAGGTAAACGTCGTTATGATCGTAAACAATCCGGTTACGGTGGTCAAACTAAACCAGTTTTTCACAAAAAAGCTAAAACTACTAAAAAAGTTGTCTTACGTTTAGAATGTGTTGTTTGTAAAACTAAAGCACAATTGTCTTTAAAACGTTGTAAACATTTTGAATTAGGTGGTGACAAAAAACAAAAAGGTCAAGCTTTACAATTTTAA	151		151	GGTGGTCAAACTAAA	VALID	CCA	Proline
yHMPu5000037870_candida_sp_170912_g002033.m1	4236	ATGGTTAACGTTCCAAAGACCAGAAGAACCTACTGTAAGGGTAAGGAGTGCAGAAAGCACACCCAACACAAGGTCACCCAGTACAAGGCTGGTAAGGCTTCTCTCTTCGCCCAAGGTAAGCGTCGTTATGACCGTAAACAATCCGGTTACGGTGGTCAAACCAAGCCAGTTTTCCATAAGAAGGCTAAGACTACCAAGAAGGTTGTCTTGCGTTTGGAGTGTGTTGTTTGCAAGACCAAGGCTCAATTGTCCTTGAAGCGTTGTAAGCACTTTGAGTTGGGTGGTGACAAGAAGCAAAAGGGTCAGGCTTTGCAATTTTAA	ATGGTTAACGTTCCAAAGACCAGAAGAACCTACTGTAAGGGTAAGGAGTGCAGAAAGCACACCCAACACAAGGTCACCCAGTACAAGGCTGGTAAGGCTTCTCTCTTCGCCCAAGGTAAGCGTCGTTATGACCGTAAACAATCCGGTTACGGTGGTCAAACCAAGCCAGTTTTCCATAAGAAGGCTAAGACTACCAAGAAGGTTGTCTTGCGTTTGGAGTGTGTTGTTTGCAAGACCAAGGCTCAATTGTCCTTGAAGCGTTGTAAGCACTTTGAGTTGGGTGGTGACAAGAAGCAAAAGGGTCAGGCTTTGCAATTTTAA	151		151	GGTGGTCAAACCAAG	VALID	CCA	Proline
yHMPu5000038105_candida_maesa_201018_g005018.m1	4236	ATGGTTAACGTTCCAAAGACCAGAAGAACCTACTGTAAGGGTAAGGAGTGCCGCAAGCACACCCAGCACAAGGTCACCCAGTACAAGGCTGGTAAGGCTTCCCTTTTCGCTCAGGGTAAGCGTCGTTATGACCGTAAGCAGTCCGGTTACGGTGGTCAGACCAAGCCAGTCTTCCATAAGAAGGCTAAGACTACCAAGAAGGTTGTTCTCAGATTGGAGTGTGTTGTCTGCAAGACCAAGGCTCAGCTCTCTTTGAAGAGATGTAAGCACTTCGAGCTCGGTGGTGACAAGAAGCAGAAGGGTCAGGCTTTGCAGTTCTAA	ATGGTTAACGTTCCAAAGACCAGAAGAACCTACTGTAAGGGTAAGGAGTGCCGCAAGCACACCCAGCACAAGGTCACCCAGTACAAGGCTGGTAAGGCTTCCCTTTTCGCTCAGGGTAAGCGTCGTTATGACCGTAAGCAGTCCGGTTACGGTGGTCAGACCAAGCCAGTCTTCCATAAGAAGGCTAAGACTACCAAGAAGGTTGTTCTCAGATTGGAGTGTGTTGTCTGCAAGACCAAGGCTCAGCTCTCTTTGAAGAGATGTAAGCACTTCGAGCTCGGTGGTGACAAGAAGCAGAAGGGTCAGGCTTTGCAGTTCTAA	#VALUE!	151	#VALUE!	#VALUE!	#VALUE!	#VALUE!	#VALUE!
yHMPu5000038315_wickerhamomyces_tratensis_190924.haplomerger2_g003361.m1	4236	ATGGTTAACGTTCCAAAAACTAGAAGAACTTACTGTAAGGGTAAGGAATGTCGTAAGCACACTCAACACAAAGTTACCCAATACAAAGCTGGTAAGGCCTCATTATTCGCTCAAGGTAAGCGTCGTTATGACCGTAAACAATCTGGTTACGGTGGTCAAACCAAACCTGTTTTCCACAAAAAGGCTAAAACTACCAAGAAAGTTGTTTTACGTTTAGAATGTGTTGTCTGTAAGACCAAAGCTCAATTATCATTAAAGCGTTGTAAGCATTTTGAATTAGGTGGTGATAAGAAACAAAAAGGTCAAGCTTTACAATTCTAA	ATGGTTAACGTTCCAAAAACTAGAAGAACTTACTGTAAGGGTAAGGAATGTCGTAAGCACACTCAACACAAAGTTACCCAATACAAAGCTGGTAAGGCCTCATTATTCGCTCAAGGTAAGCGTCGTTATGACCGTAAACAATCTGGTTACGGTGGTCAAACCAAACCTGTTTTCCACAAAAAGGCTAAAACTACCAAGAAAGTTGTTTTACGTTTAGAATGTGTTGTCTGTAAGACCAAAGCTCAATTATCATTAAAGCGTTGTAAGCATTTTGAATTAGGTGGTGATAAGAAACAAAAAGGTCAAGCTTTACAATTCTAA	151		151	GGTGGTCAAACCAAA	VALID	CCT	Proline
yHMPu5000038385_candida_namnaoensis_170713_g001351.m1	4236	ATGGTTAACGTTCCAAAAACTAGAAGAACTTACTGTAAGGGTAAGGAATGTCGTAAGCACACTCAACACAAAGTTACCCAATACAAAGCTGGTAAGGCCTCATTATTCGCTCAAGGTAAGCGTCGTTATGACCGTAAACAATCTGGTTACGGTGGTCAAACCAAACCTGTTTTCCACAAAAAGGCTAAAACTACCAAGAAAGTTGTTTTACGTTTAGAATGTGTTGTCTGTAAGACCAAAGCTCAATTATCATTAAAGCGTTGTAAGCATTTTGAATTAGGTGGTGATAAGAAACAAAAAGGTCAAGCTTTACAATTCTAA	ATGGTTAACGTTCCAAAAACTAGAAGAACTTACTGTAAGGGTAAGGAATGTCGTAAGCACACTCAACACAAAGTTACCCAATACAAAGCTGGTAAGGCCTCATTATTCGCTCAAGGTAAGCGTCGTTATGACCGTAAACAATCTGGTTACGGTGGTCAAACCAAACCTGTTTTCCACAAAAAGGCTAAAACTACCAAGAAAGTTGTTTTACGTTTAGAATGTGTTGTCTGTAAGACCAAAGCTCAATTATCATTAAAGCGTTGTAAGCATTTTGAATTAGGTGGTGATAAGAAACAAAAAGGTCAAGCTTTACAATTCTAA	151		151	GGTGGTCAAACCAAA	VALID	CCT	Proline
yHMPu5000026073_candida_easanensis_180604_g003784.m1	4236	ATGGTTAACGTTCCAAAGACCAGAAGAACTTACTGTAAGGGTAAGGAGTGCCGTAAGCACACCCAGCACAAGGTTACTCAGTACAAGGCTGGTAAGGCTTCCCTTTTCGCTCAGGGTAAGCGTCGTTATGACCGTAAGCAGTCCGGTTACGGTGGTCAGACCAAGCCAGTCTTCCATAAGAAGGCTAAGACCACCAAGAAGGTTGTTTTGAGATTGGAGTGTGTTGTCTGCAAGACCAAGGCCCAGCTCGCTTTGAAGAGATGTAAGCACTTCGAGCTCGGTGGTGACAAGAAGCAGAAGGGTCAGGCTTTGCAGTTCTAA	ATGGTTAACGTTCCAAAGACCAGAAGAACTTACTGTAAGGGTAAGGAGTGCCGTAAGCACACCCAGCACAAGGTTACTCAGTACAAGGCTGGTAAGGCTTCCCTTTTCGCTCAGGGTAAGCGTCGTTATGACCGTAAGCAGTCCGGTTACGGTGGTCAGACCAAGCCAGTCTTCCATAAGAAGGCTAAGACCACCAAGAAGGTTGTTTTGAGATTGGAGTGTGTTGTCTGCAAGACCAAGGCCCAGCTCGCTTTGAAGAGATGTAAGCACTTCGAGCTCGGTGGTGACAAGAAGCAGAAGGGTCAGGCTTTGCAGTTCTAA	#VALUE!	151	#VALUE!	#VALUE!	#VALUE!	#VALUE!	#VALUE!
yHMPu5000034966_cyberlindnera_sargentensis_160519_g005799.m1	4236	ATGGTTAACGTTCCAAAGACAAGAAGAACCTACTGTAAGGGTAAGGAGTGCAGAAAGCACACCCAACACAAGGTCACCCAGTACAAGGCTGGTAAGGCTTCTCTTTTCGCCCAAGGTAAGCGTCGTTACGACCGTAAGCAATCCGGTTACGGTGGTCAAACCAAGCCAGTCTTCCACAAGAAAGCTAAGACTACCAAGAAGGTTGTCTTGCGTTTGGAGTGTGTTGTTTGTAAGACCAAAGCTCAATTGGCTTTGAAACGTTGTAAGCACTTCGAGCTTGGTGGTGACAAGAAGCAAAAGGGTCAAGCTTTGCAATTCTAA	ATGGTTAACGTTCCAAAGACAAGAAGAACCTACTGTAAGGGTAAGGAGTGCAGAAAGCACACCCAACACAAGGTCACCCAGTACAAGGCTGGTAAGGCTTCTCTTTTCGCCCAAGGTAAGCGTCGTTACGACCGTAAGCAATCCGGTTACGGTGGTCAAACCAAGCCAGTCTTCCACAAGAAAGCTAAGACTACCAAGAAGGTTGTCTTGCGTTTGGAGTGTGTTGTTTGTAAGACCAAAGCTCAATTGGCTTTGAAACGTTGTAAGCACTTCGAGCTTGGTGGTGACAAGAAGCAAAAGGGTCAAGCTTTGCAATTCTAA	151		151	GGTGGTCAAACCAAG	VALID	CCA	Proline
yHMPu5000034978_cyberlindnera_mrakii_160519_g005678.m1	4236	ATGGTTAACGTTCCAAAGACCAGAAGAACCTACTGTAAGGGTAAGGAGTGCAGAAAGCACACCCAACACAAGGTCACCCAGTACAAGGCTGGTAAGGCTTCTCTTTTCGCCCAAGGTAAGCGTCGTTACGACCGTAAGCAATCCGGTTACGGTGGTCAAACTAAGCCAGTCTTCCACAAGAAAGCCAAGACTACCAAGAAGGTTGTCTTGCGTTTGGAGTGTGTTGTTTGTAAGACCAAGGCTCAATTGGCTTTGAAACGTTGTAAGCACTTCGAGCTTGGTGGTGACAAGAAGCAAAAGGGTCAAGCTTTGCAATTCTAA	ATGGTTAACGTTCCAAAGACCAGAAGAACCTACTGTAAGGGTAAGGAGTGCAGAAAGCACACCCAACACAAGGTCACCCAGTACAAGGCTGGTAAGGCTTCTCTTTTCGCCCAAGGTAAGCGTCGTTACGACCGTAAGCAATCCGGTTACGGTGGTCAAACTAAGCCAGTCTTCCACAAGAAAGCCAAGACTACCAAGAAGGTTGTCTTGCGTTTGGAGTGTGTTGTTTGTAAGACCAAGGCTCAATTGGCTTTGAAACGTTGTAAGCACTTCGAGCTTGGTGGTGACAAGAAGCAAAAGGGTCAAGCTTTGCAATTCTAA	151		151	GGTGGTCAAACTAAG	VALID	CCA	Proline
yHMPu5000035324_cyberlindnera_subsufficiens_A3_201018_g000937.m1	4236	ATGGTTAACGTTCCAAAGACCAGAAGAACCTACTGTAAGGGTAAGGAGTGCAGAAAGCACACTCAACACAAGGTCACCCAGTACAAGGCTGGTAAGGCTTCTCTTTTCGCCCAAGGTAAGCGTCGTTATGACCGTAAGCAATCCGGTTACGGTGGTCAAACCAAGCCAGTCTTCCACAAGAAAGCTAAAACTACCAAGAAGGTTGTTTTGCGTTTGGAGTGTGTTGTTTGTAAGACCAAGGCTCAATTGGCTTTGAAGCGTTGTAAGCACTTCGAGCTTGGTGGTGACAAGAAGCAAAAGGGTCAAGCTTTGCAATTCTAA	ATGGTTAACGTTCCAAAGACCAGAAGAACCTACTGTAAGGGTAAGGAGTGCAGAAAGCACACTCAACACAAGGTCACCCAGTACAAGGCTGGTAAGGCTTCTCTTTTCGCCCAAGGTAAGCGTCGTTATGACCGTAAGCAATCCGGTTACGGTGGTCAAACCAAGCCAGTCTTCCACAAGAAAGCTAAAACTACCAAGAAGGTTGTTTTGCGTTTGGAGTGTGTTGTTTGTAAGACCAAGGCTCAATTGGCTTTGAAGCGTTGTAAGCACTTCGAGCTTGGTGGTGACAAGAAGCAAAAGGGTCAAGCTTTGCAATTCTAA	151		151	GGTGGTCAAACCAAG	VALID	CCA	Proline
yHMPu5000035336_cyberlindnera_jadinii_180604.haplomerger2_g002889.m1	4236	ATGGTTAACGTTCCAAAGACCAGAAGAACCTACTGTAAGGGTAAGGAGTGCAGAAAGCACACTCAACACAAGGTTACCCAGTACAAGGCTGGTAAGGCTTCCCTCTTTGCCCAGGGTAAGCGTCGTTATGACCGTAAGCAATCCGGTTACGGTGGTCAAACCAAGCCAGTTTTCCACAAAAAGGCTAAAACCACCAAGAAGGTTGTTTTGCGTTTGGAGTGTGTTGTCTGCAAGACCAAGGCCCAATTGGCTTTGAAGCGTTGTAAGCACTTCGAGTTGGGTGGTGACAAGAAGCAAAAGGGTCAAGCTTTGCAATTCTAA	ATGGTTAACGTTCCAAAGACCAGAAGAACCTACTGTAAGGGTAAGGAGTGCAGAAAGCACACTCAACACAAGGTTACCCAGTACAAGGCTGGTAAGGCTTCCCTCTTTGCCCAGGGTAAGCGTCGTTATGACCGTAAGCAATCCGGTTACGGTGGTCAAACCAAGCCAGTTTTCCACAAAAAGGCTAAAACCACCAAGAAGGTTGTTTTGCGTTTGGAGTGTGTTGTCTGCAAGACCAAGGCCCAATTGGCTTTGAAGCGTTGTAAGCACTTCGAGTTGGGTGGTGACAAGAAGCAAAAGGGTCAAGCTTTGCAATTCTAA	151		151	GGTGGTCAAACCAAG	VALID	CCA	Proline
yHMPu5000035686_Cyberlindnera_saturnus_SPADES_g001741.m1	4236	ATGGTTAACGTTCCAAAGACCAGAAGAACCTACTGTAAGGGTAAGGAGTGCAGAAAGCACACCCAACACAAGGTCACCCAGTACAAGGCTGGTAAGGCTTCTCTTTTCGCCCAAGGTAAGCGTCGTTACGACCGTAAGCAATCCGGTTACGGTGGTCAAACCAAGCCAGTCTTCCACAAGAAAGCTAAAACTACCAAGAAGGTTGTCTTGCGTTTGGAGTGTGTTGTTTGTAAGACCAAGGCTCAATTGGCTTTGAAGCGTTGTAAGCACTTCGAGCTTGGTGGTGACAAGAAGCAAAAGGGTCAAGCTTTGCAATTCTAG	ATGGTTAACGTTCCAAAGACCAGAAGAACCTACTGTAAGGGTAAGGAGTGCAGAAAGCACACCCAACACAAGGTCACCCAGTACAAGGCTGGTAAGGCTTCTCTTTTCGCCCAAGGTAAGCGTCGTTACGACCGTAAGCAATCCGGTTACGGTGGTCAAACCAAGCCAGTCTTCCACAAGAAAGCTAAAACTACCAAGAAGGTTGTCTTGCGTTTGGAGTGTGTTGTTTGTAAGACCAAGGCTCAATTGGCTTTGAAGCGTTGTAAGCACTTCGAGCTTGGTGGTGACAAGAAGCAAAAGGGTCAAGCTTTGCAATTCTAG	151		151	GGTGGTCAAACCAAG	VALID	CCA	Proline
yHMPu5000035687_cyberlindnera_suaveolens_160613_g003483.m1	4236	ATGGTTAACGTTCCAAAGACCAGAAGAACCTACTGTAAGGGTAAGGAGTGCAGAAAGCACACCCAACACAAGGTCACCCAGTACAAGGCTGGTAAAGCTTCTCTTTTCGCCCAAGGTAAGCGTCGTTACGACCGTAAGCAATCCGGTTACGGTGGTCAAACCAAGCCAGTCTTCCACAAGAAAGCTAAGACTACCAAGAAGGTTGTCTTGCGTTTGGAGTGTGTTGTTTGTAAGACCAAGGCTCAATTGGCTTTGAAGCGTTGTAAGCACTTCGAGCTTGGTGGTGACAAGAAGCAAAAGGGTCAAGCTTTGCAATTCTAA	ATGGTTAACGTTCCAAAGACCAGAAGAACCTACTGTAAGGGTAAGGAGTGCAGAAAGCACACCCAACACAAGGTCACCCAGTACAAGGCTGGTAAAGCTTCTCTTTTCGCCCAAGGTAAGCGTCGTTACGACCGTAAGCAATCCGGTTACGGTGGTCAAACCAAGCCAGTCTTCCACAAGAAAGCTAAGACTACCAAGAAGGTTGTCTTGCGTTTGGAGTGTGTTGTTTGTAAGACCAAGGCTCAATTGGCTTTGAAGCGTTGTAAGCACTTCGAGCTTGGTGGTGACAAGAAGCAAAAGGGTCAAGCTTTGCAATTCTAA	151		151	GGTGGTCAAACCAAG	VALID	CCA	Proline
yHMPu5000035690_candida_vartiovaarae_160613_g002173.m1	4236	ATGGTTAACGTTCCAAAGACTAGAAGAACCTACTGTAAGGGTAAGGAGTGCAGAAAGCACACCCAGCACAAGGTCACCCAGTACAAGGCTGGTAAGGCTTCTCTTTTCGCCCAGGGTAAGCGTCGTTACGACCGTAAGCAATCCGGTTACGGTGGTCAGACCAAGCCAGTCTTCCACAAGAAGGCTAAGACTACCAAGAAGGTTGTCTTGCGTTTGGAGTGTGTTGTTTGCAAGACCAAGGCTCAGTTGGCCTTGAAGCGTTGTAAGCACTTCGAGTTGGGTGGTGACAAGAAGCAGAAGGGTCAGGCTTTGCAGTTCTAA	ATGGTTAACGTTCCAAAGACTAGAAGAACCTACTGTAAGGGTAAGGAGTGCAGAAAGCACACCCAGCACAAGGTCACCCAGTACAAGGCTGGTAAGGCTTCTCTTTTCGCCCAGGGTAAGCGTCGTTACGACCGTAAGCAATCCGGTTACGGTGGTCAGACCAAGCCAGTCTTCCACAAGAAGGCTAAGACTACCAAGAAGGTTGTCTTGCGTTTGGAGTGTGTTGTTTGCAAGACCAAGGCTCAGTTGGCCTTGAAGCGTTGTAAGCACTTCGAGTTGGGTGGTGACAAGAAGCAGAAGGGTCAGGCTTTGCAGTTCTAA	#VALUE!	151	#VALUE!	#VALUE!	#VALUE!	#VALUE!	#VALUE!
yHMPu5000037227_cyberlindnera_xishuangbannaensis_210210_g005024.m1	4236	ATGGTTAACGTTCCAAAGACCAGAAGAACCTACTGTAAGGGTAAAGAGTGCCGCAAGCACACCCAGCACAAGGTTACTCAGTACAAGGCTGGTAAGGCTTCCCTCTTCGCTCAGGGTAAGCGTCGTTACGACCGTAAGCAGTCTGGTTACGGTGGTCAGACCAAGCCAGTCTTCCACAAGAAGGCTAAGACCACCAAGAAGGTTGTTTTGAGATTGGAGTGTGTTGTCTGCAAGACCAAGGCCCAGCTCGCTTTGAAGAGATGTAAGCACTTCGAGCTCGGTGGTGACAAGAAGCAGAAGGGTCAGGCTTTGCAGTTCTAA	ATGGTTAACGTTCCAAAGACCAGAAGAACCTACTGTAAGGGTAAAGAGTGCCGCAAGCACACCCAGCACAAGGTTACTCAGTACAAGGCTGGTAAGGCTTCCCTCTTCGCTCAGGGTAAGCGTCGTTACGACCGTAAGCAGTCTGGTTACGGTGGTCAGACCAAGCCAGTCTTCCACAAGAAGGCTAAGACCACCAAGAAGGTTGTTTTGAGATTGGAGTGTGTTGTCTGCAAGACCAAGGCCCAGCTCGCTTTGAAGAGATGTAAGCACTTCGAGCTCGGTGGTGACAAGAAGCAGAAGGGTCAGGCTTTGCAGTTCTAA	#VALUE!	151	#VALUE!	#VALUE!	#VALUE!	#VALUE!	#VALUE!
yHMPu5000038067_cyberlindnera_bimundalis_190924_g006111.m1	4236	ATGGTTAACGTTCCAAAGACCAGAAGAACTTACTGTAAGGGTAAGGAGTGCCGTAAGCACACCCAGCACAAGGTTACTCAGTACAAGGCTGGTAAGGCTTCCTTGTTCGCCCAGGGTAAGCGTCGTTACGACCGTAAGCAGTCCGGTTACGGTGGTCAGACCAAGCCAGTTTTCCATAAGAAGGCTAAGACTACCAAGAAGGTTGTCTTGAGATTGGAGTGTGTTGTTTGCAAGACCAAGGCTCAGTTGGCTTTGAAGAGATGTAAGCACTTCGAGCTTGGTGGTGACAAGAAGCAGAAGGGTCAGGCTTTGCAGTTCTAA	ATGGTTAACGTTCCAAAGACCAGAAGAACTTACTGTAAGGGTAAGGAGTGCCGTAAGCACACCCAGCACAAGGTTACTCAGTACAAGGCTGGTAAGGCTTCCTTGTTCGCCCAGGGTAAGCGTCGTTACGACCGTAAGCAGTCCGGTTACGGTGGTCAGACCAAGCCAGTTTTCCATAAGAAGGCTAAGACTACCAAGAAGGTTGTCTTGAGATTGGAGTGTGTTGTTTGCAAGACCAAGGCTCAGTTGGCTTTGAAGAGATGTAAGCACTTCGAGCTTGGTGGTGACAAGAAGCAGAAGGGTCAGGCTTTGCAGTTCTAA	#VALUE!	151	#VALUE!	#VALUE!	#VALUE!	#VALUE!	#VALUE!
yHMPu5000038068_cyberlindnera_samutprakarnensis_170912.haplomerger2_g003111.m1	4236	ATGGTTAACGTTCCAAAGACCAGAAGAACCTACTGTAAGGGTAAGGAGTGCAGAAAGCACACTCAACACAAGGTTACTCAGTACAAGGCTGGTAAGGCTTCCCTCTTTGCCCAAGGTAAGCGTCGTTATGACCGTAAGCAATCCGGTTACGGTGGTCAAACCAAGCCAGTCTTCCACAAAAAGGCTAAAACTACCAAGAAGGTTGTTTTGCGTTTGGAGTGTGTTGTCTGTAAGACCAAGGCTCAATTGGCTTTGAAGCGTTGTAAGCACTTCGAATTGGGTGGTGACAAGAAGCAAAAGGGTCAAGCTTTGCAATTCTAA	ATGGTTAACGTTCCAAAGACCAGAAGAACCTACTGTAAGGGTAAGGAGTGCAGAAAGCACACTCAACACAAGGTTACTCAGTACAAGGCTGGTAAGGCTTCCCTCTTTGCCCAAGGTAAGCGTCGTTATGACCGTAAGCAATCCGGTTACGGTGGTCAAACCAAGCCAGTCTTCCACAAAAAGGCTAAAACTACCAAGAAGGTTGTTTTGCGTTTGGAGTGTGTTGTCTGTAAGACCAAGGCTCAATTGGCTTTGAAGCGTTGTAAGCACTTCGAATTGGGTGGTGACAAGAAGCAAAAGGGTCAAGCTTTGCAATTCTAA	151		151	GGTGGTCAAACCAAG	VALID	CCA	Proline
yHMPu5000038084_candida_stauntonica_170912_g003003.m1	4236	ATGGTTAACGTTCCAAAGACCAGAAGAACTTACTGTAAGGGTAAGGAGTGCCGTAAGCACACCCAGCACAAGGTTACTCAGTACAAGGCTGGTAAGGCTTCCCTTTTCGCTCAGGGTAAGCGTCGTTACGACCGTAAGCAGTCCGGTTACGGTGGTCAGACCAAGCCAGTCTTCCATAAGAAGGCTAAGACCACCAAGAAGGTCGTCTTGAGATTGGAGTGTGTTGTCTGTAAGACTAAGGCTCAGCTCGCTTTGAAGAGATGTAAGCACTTCGAGCTCGGTGGTGACAAGAAGCAGAAGGGTCAGGCTTTGCAGTTCTAA	ATGGTTAACGTTCCAAAGACCAGAAGAACTTACTGTAAGGGTAAGGAGTGCCGTAAGCACACCCAGCACAAGGTTACTCAGTACAAGGCTGGTAAGGCTTCCCTTTTCGCTCAGGGTAAGCGTCGTTACGACCGTAAGCAGTCCGGTTACGGTGGTCAGACCAAGCCAGTCTTCCATAAGAAGGCTAAGACCACCAAGAAGGTCGTCTTGAGATTGGAGTGTGTTGTCTGTAAGACTAAGGCTCAGCTCGCTTTGAAGAGATGTAAGCACTTCGAGCTCGGTGGTGACAAGAAGCAGAAGGGTCAGGCTTTGCAGTTCTAA	#VALUE!	151	#VALUE!	#VALUE!	#VALUE!	#VALUE!	#VALUE!
yHMPu5000038113_candida_adriatica_170912_g003120.m1	4236	ATGGTTAACGTTCCAAAGACCAGAAGAACCTACTGTAAGGGTAAGGAGTGCCGTAAGCACACCCAGCACAAGGTCACCCAGTACAAGGCTGGTAAGGCTTCTCTGTTCGCCCAGGGTAAGCGTCGTTACGACCGTAAGCAGTCCGGTTACGGTGGTCAGACCAAGCCAGTCTTCCACAAGAAGGCTAAGACTACCAAGAAGGTTGTGCTCAGACTCGAGTGTGTTGTCTGCAAGACCAAGGCTCAGCTTGCCCTCAAGAGATGTAAGCACTTCGAGCTCGGTGGTGACAAGAAGCAGAAGGGCCAGGCTCTGCAGTTCTAA	ATGGTTAACGTTCCAAAGACCAGAAGAACCTACTGTAAGGGTAAGGAGTGCCGTAAGCACACCCAGCACAAGGTCACCCAGTACAAGGCTGGTAAGGCTTCTCTGTTCGCCCAGGGTAAGCGTCGTTACGACCGTAAGCAGTCCGGTTACGGTGGTCAGACCAAGCCAGTCTTCCACAAGAAGGCTAAGACTACCAAGAAGGTTGTGCTCAGACTCGAGTGTGTTGTCTGCAAGACCAAGGCTCAGCTTGCCCTCAAGAGATGTAAGCACTTCGAGCTCGGTGGTGACAAGAAGCAGAAGGGCCAGGCTCTGCAGTTCTAA	#VALUE!	151	#VALUE!	#VALUE!	#VALUE!	#VALUE!	#VALUE!
yHMPu5000038346_cyberlindnera_rhodanensis_170713.haplomerger2_g006692.m1	4236	ATGGTTAACGTTCCAAAGACCAGAAGAACTTACTGTAAGGGTAAGGAGTGCCGCAAGCACACCCAGCACAAGGTCACCCAGTACAAGGCTGGTAAGGCCTCTTTGTTCGCTCAGGGTAAGCGTCGTTACGACCGTAAGCAGTCCGGTTACGGTGGTCAGACCAAGCCAGTCTTCCACAAGAAGGCTAAGACCACCAAGAAGGTTGTGTTGAGATTGGAGTGTGTTGTCTGCAAGACCAAGGCTCAGCTCGCTTTGAAGCGTTGTAAGCACTTCGAGCTTGGTGGTGACAAGAAGCAGAAGGGTCAGGCTTTGCAGTTCTAA	ATGGTTAACGTTCCAAAGACCAGAAGAACTTACTGTAAGGGTAAGGAGTGCCGCAAGCACACCCAGCACAAGGTCACCCAGTACAAGGCTGGTAAGGCCTCTTTGTTCGCTCAGGGTAAGCGTCGTTACGACCGTAAGCAGTCCGGTTACGGTGGTCAGACCAAGCCAGTCTTCCACAAGAAGGCTAAGACCACCAAGAAGGTTGTGTTGAGATTGGAGTGTGTTGTCTGCAAGACCAAGGCTCAGCTCGCTTTGAAGCGTTGTAAGCACTTCGAGCTTGGTGGTGACAAGAAGCAGAAGGGTCAGGCTTTGCAGTTCTAA	#VALUE!	151	#VALUE!	#VALUE!	#VALUE!	#VALUE!	#VALUE!
yHMPu5000038360_candida_verbasci_170713_g002462.m1	4236	ATGGTTAACGTTCCAAAAACAAGAAGAACTTACTGTAAAGGTAAAGAATGTAGAAAACATACTCAACATAAAGTTACCCAATATAAAGCTGGTAAAGCTTCATTATTTGCTCAAGGTAAAAGAAGATATGACAGAAAACAATCAGGTTATGGTGGTCAAACAAAACCAGTTTTCCACAAAAAAGCTAAAACCACCAAAAAAGTTGTTTTAAGATTAGAATGTGTTGTTTGTAAAACTAAAGCTCAATTAGCATTAAAAAGATGTAAACATTTCGAATTGGGTGGTGATAAAAAACAAAAAGGTCAAGCTTTACAATTTTAA	ATGGTTAACGTTCCAAAAACAAGAAGAACTTACTGTAAAGGTAAAGAATGTAGAAAACATACTCAACATAAAGTTACCCAATATAAAGCTGGTAAAGCTTCATTATTTGCTCAAGGTAAAAGAAGATATGACAGAAAACAATCAGGTTATGGTGGTCAAACAAAACCAGTTTTCCACAAAAAAGCTAAAACCACCAAAAAAGTTGTTTTAAGATTAGAATGTGTTGTTTGTAAAACTAAAGCTCAATTAGCATTAAAAAGATGTAAACATTTCGAATTGGGTGGTGATAAAAAACAAAAAGGTCAAGCTTTACAATTTTAA	151		151	GGTGGTCAAACAAAA	VALID	CCA	Proline
yHMPu5000035257_wickerhamomyces_strasburgensis_170307.haplomerger2_g000423.m1	4236	ATGGTTAACGTTCCAAAAACCAGAAGAACTTACTGTAAGGGTAAAGAGTGCAGAAAGCACACCCAACACAAGGTCACCCAATACAAAGCTGGTAAAGCTTCTTTGTTTGCTCAAGGTAAACGTCGTTATGACCGTAAACAATCCGGTTACGGTGGTCAAACCAAACCTGTTTTCCACAAAAAGGCTAAAACTACCAAGAAGGTTGTCTTACGTTTGGAATGTGTTGTTTGCAAAACCAAAGCCCAATTAGCTTTGAAACGTTGTAAACATTTCGAATTAGGTGGTGACAGAAAACAAAAAGGTCAAGCTTTGCAATTCTAA	ATGGTTAACGTTCCAAAAACCAGAAGAACTTACTGTAAGGGTAAAGAGTGCAGAAAGCACACCCAACACAAGGTCACCCAATACAAAGCTGGTAAAGCTTCTTTGTTTGCTCAAGGTAAACGTCGTTATGACCGTAAACAATCCGGTTACGGTGGTCAAACCAAACCTGTTTTCCACAAAAAGGCTAAAACTACCAAGAAGGTTGTCTTACGTTTGGAATGTGTTGTTTGCAAAACCAAAGCCCAATTAGCTTTGAAACGTTGTAAACATTTCGAATTAGGTGGTGACAGAAAACAAAAAGGTCAAGCTTTGCAATTCTAA	151		151	GGTGGTCAAACCAAA	VALID	CCT	Proline
yHMPu5000034967_candida_freyschussii_160519_g005283.m1	4236	ATGGTTAACGTTCCAAAAACCAGAAAGACTTACTGTAAGGGTAAAGAGTGTCGTAAACACACTCAACACAAGGTTACTCAATACAAGGCTGGTAAGGCTTCCTTGTTTGCCCAGGGTAAGCGTCGTTATGACCGTAAACAATCCGGTTACGGTGGTCAAACCAAGCCAGTTTTCCACAAGAAAGCTAAAACTACCAAAAAGGTTGTTTTGCGTTTGGAATGTGTTGTCTGCAAGACCAAGGCTCAGTTGGCTTTGAAGCGTTGTAAGCACTTTGAATTGGGTGGTGACAAGAAACAAAAGGGTCAAGCTTTGCAATTTTAA	ATGGTTAACGTTCCAAAAACCAGAAAGACTTACTGTAAGGGTAAAGAGTGTCGTAAACACACTCAACACAAGGTTACTCAATACAAGGCTGGTAAGGCTTCCTTGTTTGCCCAGGGTAAGCGTCGTTATGACCGTAAACAATCCGGTTACGGTGGTCAAACCAAGCCAGTTTTCCACAAGAAAGCTAAAACTACCAAAAAGGTTGTTTTGCGTTTGGAATGTGTTGTCTGCAAGACCAAGGCTCAGTTGGCTTTGAAGCGTTGTAAGCACTTTGAATTGGGTGGTGACAAGAAACAAAAGGGTCAAGCTTTGCAATTTTAA	151		151	GGTGGTCAAACCAAG	VALID	CCA	Proline
yHMPu5000035337_cyberlindnera_mississippiensis_190924_g001545.m1	4236	ATGGTTAACGTTCCAAAGACCAGAAAGACCTACTGTAAGGGTAAGGAGTGCCGTAAGCACACCCAGCACAAGGTTACTCAGTACAAGGCTGGTAAGGCTTCCCTTTTCGCTCAGGGTAAGCGTCGTTACGACCGTAAGCAGTCCGGTTACGGTGGTCAGACCAAGCCAGTCTTCCATAAGAAGGCTAAGACCACCAAGAAGGTCGTCTTGAGATTGGAGTGTGTTGTTTGCAAGACCAAGGCTCAGCTCGCTTTGAAGAGATGTAAGCACTTCGAGCTCGGTGGTGACAAGAAGCAGAAGGGTCAGGCTTTGCAGTTCTAA	ATGGTTAACGTTCCAAAGACCAGAAAGACCTACTGTAAGGGTAAGGAGTGCCGTAAGCACACCCAGCACAAGGTTACTCAGTACAAGGCTGGTAAGGCTTCCCTTTTCGCTCAGGGTAAGCGTCGTTACGACCGTAAGCAGTCCGGTTACGGTGGTCAGACCAAGCCAGTCTTCCATAAGAAGGCTAAGACCACCAAGAAGGTCGTCTTGAGATTGGAGTGTGTTGTTTGCAAGACCAAGGCTCAGCTCGCTTTGAAGAGATGTAAGCACTTCGAGCTCGGTGGTGACAAGAAGCAGAAGGGTCAGGCTTTGCAGTTCTAA	#VALUE!	151	#VALUE!	#VALUE!	#VALUE!	#VALUE!	#VALUE!
yHMPu5000037904_candida_nakhonratchasimensis_170912_g000109.m1	4236	ATGGTTAACGTTCCAAAGACCAGAAAAACTTACTGTAAGGGTAAGGAGTGCCGTAAGCACACCCAGCACAAGGTTACTCAGTACAAGGCTGGTAAGGCTTCCTTGTTTGCTCAGGGTAAGCGTCGTTACGACCGTAAGCAGTCCGGTTACGGTGGTCAGACCAAGCCAGTTTTCCACAAGAAGGCTAAGACTACCAAGAAGGTTGTCTTGAGATTGGAGTGTGTTGTTTGCAAGACCAAGGCTCAGTTGGCTTTGAAGAGATGTAAGCACTTCGAGCTTGGTGGTGACAAGAAGCAGAAGGGTCAGGCTTTGCAGTTCTAA	ATGGTTAACGTTCCAAAGACCAGAAAAACTTACTGTAAGGGTAAGGAGTGCCGTAAGCACACCCAGCACAAGGTTACTCAGTACAAGGCTGGTAAGGCTTCCTTGTTTGCTCAGGGTAAGCGTCGTTACGACCGTAAGCAGTCCGGTTACGGTGGTCAGACCAAGCCAGTTTTCCACAAGAAGGCTAAGACTACCAAGAAGGTTGTCTTGAGATTGGAGTGTGTTGTTTGCAAGACCAAGGCTCAGTTGGCTTTGAAGAGATGTAAGCACTTCGAGCTTGGTGGTGACAAGAAGCAGAAGGGTCAGGCTTTGCAGTTCTAA	#VALUE!	151	#VALUE!	#VALUE!	#VALUE!	#VALUE!	#VALUE!
yHMPu5000034990_Candida_corydali_SPADES_g001507.m1	4236	ATGGTTAACGTTCCAAAGACTAGAAAGACCTACTGTAAAGGTAGAGAATGTAGAAAACACACTCAACACAAAGTTACCCAATACAAAGCAGGTAAAGCTTCTTTATTCGCTCAAGGTAAAAGAAGATATGACAGAAAACAATCAGGTTACGGTGGTCAAACCAAACCAGTTTTCCACAAAAAGGCTAAAACTACCAAAAAAGTTGTTTTGAGATTAGAATGTGTTGTTTGTAAAACCAAAGCTCAATTGGCTTTGAAAAGATGTAAACATTTCGAATTGGGTGGTGATAAAAAACAAAAAGGTCAAGCTTTACAATTTTAA	ATGGTTAACGTTCCAAAGACTAGAAAGACCTACTGTAAAGGTAGAGAATGTAGAAAACACACTCAACACAAAGTTACCCAATACAAAGCAGGTAAAGCTTCTTTATTCGCTCAAGGTAAAAGAAGATATGACAGAAAACAATCAGGTTACGGTGGTCAAACCAAACCAGTTTTCCACAAAAAGGCTAAAACTACCAAAAAAGTTGTTTTGAGATTAGAATGTGTTGTTTGTAAAACCAAAGCTCAATTGGCTTTGAAAAGATGTAAACATTTCGAATTGGGTGGTGATAAAAAACAAAAAGGTCAAGCTTTACAATTTTAA	151		151	GGTGGTCAAACCAAA	VALID	CCA	Proline
yHMPu5000037915_candida_catenulata_190924_g000602.m1	4236	ATGGTCAACGTTCCCAAGACTAGAAAGACCTACTGCAAGGGCAAGGAGTGCAAGAAGCACACTCAACACAAGGTCACCCAATACAAGGCTGGTAAGGCTTCCTTGTTCGCTCAGGGTAAGAGAAGATACGACCGGAAGCAGTCCGGTTACGGTGGTCAGACCAAGCCTGTTTTCCACAAGAAGGCTAAGACCACCAAGAAGGTTGTTTTGAGATTGGAGTGTGTTGTTTGCAAGACCAAGGCTCAGCTCGCTTTGAAGAGATGCAAGCACTTCGAGTTGGGTGGTGACAAAAAGCAGAAGGGTCAGGCCTTGCAGTTCTAA	ATGGTCAACGTTCCCAAGACTAGAAAGACCTACTGCAAGGGCAAGGAGTGCAAGAAGCACACTCAACACAAGGTCACCCAATACAAGGCTGGTAAGGCTTCCTTGTTCGCTCAGGGTAAGAGAAGATACGACCGGAAGCAGTCCGGTTACGGTGGTCAGACCAAGCCTGTTTTCCACAAGAAGGCTAAGACCACCAAGAAGGTTGTTTTGAGATTGGAGTGTGTTGTTTGCAAGACCAAGGCTCAGCTCGCTTTGAAGAGATGCAAGCACTTCGAGTTGGGTGGTGACAAAAAGCAGAAGGGTCAGGCCTTGCAGTTCTAA	#VALUE!	151	#VALUE!	#VALUE!	#VALUE!	#VALUE!	#VALUE!
yHMPu5000035702_cyberlindnera_amylophila_160613.haplomerger2_g003600.m1	4236	ATGGTTAACGTTCCAAAGACCAGAAAGACCTACTGTAAGGGTAAGGAGTGCCGTAAGCACACCCAGCACAAGGTTACTCAGTACAAGGCTGGTAAGGCTTCCCTTTTCGCTCAGGGTAAGCGTCGTTACGACCGTAAGCAGGCCGGTTACGGTGGTCAGACCAAGCCAGTCTTCCATAAGAAGGCTAAGACTACCAAGAAGGTTGTTTTGAGATTGGAGTGTGTTGTTTGCAAGACCAAGGCTCAGCTCGCTTTGAAGAGATGTAAGCACTTCGAGCTCGGTGGTGACAAGAAGCAGAAGGGTCAGGCTTTGCAGTTCTAA	ATGGTTAACGTTCCAAAGACCAGAAAGACCTACTGTAAGGGTAAGGAGTGCCGTAAGCACACCCAGCACAAGGTTACTCAGTACAAGGCTGGTAAGGCTTCCCTTTTCGCTCAGGGTAAGCGTCGTTACGACCGTAAGCAGGCCGGTTACGGTGGTCAGACCAAGCCAGTCTTCCATAAGAAGGCTAAGACTACCAAGAAGGTTGTTTTGAGATTGGAGTGTGTTGTTTGCAAGACCAAGGCTCAGCTCGCTTTGAAGAGATGTAAGCACTTCGAGCTCGGTGGTGACAAGAAGCAGAAGGGTCAGGCTTTGCAGTTCTAA	#VALUE!	151	#VALUE!	#VALUE!	#VALUE!	#VALUE!	#VALUE!
yHMPu5000037872_cyberlindnera_euphorbiiphila_180604_g001403.m1	4236	ATGGTTAACGTTCCAAAGACCAGAAAAACTTACTGCAAGGGTAAGGAGTGCCGCAAGCACACCCAGCACAAGGTCACCCAGTACAAGGCTGGTAAGGCTTCTTTGTTCGCCCAGGGTAAGCGTCGTTATGACCGTAAGCAGGCCGGTTACGGTGGTCAGACCAAGCCAGTCTTCCACAAGAAGGCTAAGACCACCAAGAAGGTTGTTTTGAGATTGGAGTGTGTTGTCTGCAAGACCAAGGCTCAGTTGGCTTTGAAGAGATGCAAGCACTTTGAGCTCGGTGGTGACAAGAAGCAGAAGGGTCAGGCTTTGCAGTTCTAA	ATGGTTAACGTTCCAAAGACCAGAAAAACTTACTGCAAGGGTAAGGAGTGCCGCAAGCACACCCAGCACAAGGTCACCCAGTACAAGGCTGGTAAGGCTTCTTTGTTCGCCCAGGGTAAGCGTCGTTATGACCGTAAGCAGGCCGGTTACGGTGGTCAGACCAAGCCAGTCTTCCACAAGAAGGCTAAGACCACCAAGAAGGTTGTTTTGAGATTGGAGTGTGTTGTCTGCAAGACCAAGGCTCAGTTGGCTTTGAAGAGATGCAAGCACTTTGAGCTCGGTGGTGACAAGAAGCAGAAGGGTCAGGCTTTGCAGTTCTAA	#VALUE!	151	#VALUE!	#VALUE!	#VALUE!	#VALUE!	#VALUE!
yHMPu5000038345_cyberlindnera_veronae_170713_g006253.m1	4236	ATGGTTAACGTTCCAAAGACCAGAAAGACCTACTGTAAGGGTAAGGAGTGCCGCAAGCACACCCAGCACAAGGTTACTCAGTACAAGGCTGGTAAGGCTTCCCTTTTCGCTCAGGGTAAGCGTCGTTACGACCGTAAGCAGGCCGGTTACGGTGGTCAGACCAAGCCAGTCTTCCACAAGAAGGCTAAGACTACCAAGAAGGTTGTTTTGAGATTGGAGTGTGTTGTTTGCAAGACCAAGGCTCAGTTGGCTTTGAAGAGATGTAAGCACTTCGAGCTCGGTGGTGACAAGAAGCAGAAGGGTCAGGCTTTGCAGTTCTAA	ATGGTTAACGTTCCAAAGACCAGAAAGACCTACTGTAAGGGTAAGGAGTGCCGCAAGCACACCCAGCACAAGGTTACTCAGTACAAGGCTGGTAAGGCTTCCCTTTTCGCTCAGGGTAAGCGTCGTTACGACCGTAAGCAGGCCGGTTACGGTGGTCAGACCAAGCCAGTCTTCCACAAGAAGGCTAAGACTACCAAGAAGGTTGTTTTGAGATTGGAGTGTGTTGTTTGCAAGACCAAGGCTCAGTTGGCTTTGAAGAGATGTAAGCACTTCGAGCTCGGTGGTGACAAGAAGCAGAAGGGTCAGGCTTTGCAGTTCTAA	#VALUE!	151	#VALUE!	#VALUE!	#VALUE!	#VALUE!	#VALUE!
yHMPu5000035703_cyberlindnera_americana_160613_g003681.m1	4236	ATGGTTAACGTTCCAAAGACCAGAAGAACTTACTGTAAGGGTAAGGAGTGCCGTAAGCACACCCAGCACAAGGTTACTCAGTACAAGGCTGGTAAGGCTTCCTTGTTTGCCCAGGGTAAGCGTCGTTATGACCGTAAGCAAGCCGGTTACGGTGGTCAGACCAAGCCAGTTTTCCATAAAAAGGCTAAGACCACCAAGAAGGTTGTCTTGAGATTGGAGTGTGTTGTTTGCAAGACCAAGGCTCAGTTGGCTTTGAAGAGATGTAAGCACTTCGAGCTTGGTGGTGACAAGAAGCAGAAGGGTCAGGCTTTGCAGTTCTAA	ATGGTTAACGTTCCAAAGACCAGAAGAACTTACTGTAAGGGTAAGGAGTGCCGTAAGCACACCCAGCACAAGGTTACTCAGTACAAGGCTGGTAAGGCTTCCTTGTTTGCCCAGGGTAAGCGTCGTTATGACCGTAAGCAAGCCGGTTACGGTGGTCAGACCAAGCCAGTTTTCCATAAAAAGGCTAAGACCACCAAGAAGGTTGTCTTGAGATTGGAGTGTGTTGTTTGCAAGACCAAGGCTCAGTTGGCTTTGAAGAGATGTAAGCACTTCGAGCTTGGTGGTGACAAGAAGCAGAAGGGTCAGGCTTTGCAGTTCTAA	#VALUE!	151	#VALUE!	#VALUE!	#VALUE!	#VALUE!	#VALUE!
yHMPu5000035689_candida_mycetangii_160613_g001675.m1	4236	ATGTGTCTCTGTGGAATAAAGAGAGGCTTTATTGTTAACGTTCCAAAGACCAGAAGAACTTACTGTAAGGGTAAGGAGTGCCGTAAGCACACCCAGCACAAGGTTACTCAGTACAAGGCTGGTAAGGCCTCCTTGTTCGCCCAGGGTAAGCGTCGTTACGACCGTAAGCAGTCTGGTTACGGTGGTCAGACCAAGCCAGTTTTCCATAAGAAGGCTAAGACCACCAAGAAGGTTGTCTTGAGATTGGAGTGTGTCGTTTGTAAGACTAAGGCTCAGCTTGCTTTGAAGAGATGTAAGCACTTCGAGCTTGGTGGTGACAAGAAGCAGAAGGGTCAGGCTTTGCAGTTCTAA	ATGTGTCTCTGTGGAATAAAGAGAGGCTTTATTGTTAACGTTCCAAAGACCAGAAGAACTTACTGTAAGGGTAAGGAGTGCCGTAAGCACACCCAGCACAAGGTTACTCAGTACAAGGCTGGTAAGGCCTCCTTGTTCGCCCAGGGTAAGCGTCGTTACGACCGTAAGCAGTCTGGTTACGGTGGTCAGACCAAGCCAGTTTTCCATAAGAAGGCTAAGACCACCAAGAAGGTTGTCTTGAGATTGGAGTGTGTCGTTTGTAAGACTAAGGCTCAGCTTGCTTTGAAGAGATGTAAGCACTTCGAGCTTGGTGGTGACAAGAAGCAGAAGGGTCAGGCTTTGCAGTTCTAA	#VALUE!	181	#VALUE!	#VALUE!	#VALUE!	#VALUE!	#VALUE!
yHMPu5000026055_diutina_siamensis_170912_g004688.m1	4236	ATGGTTAACGTTCCTAAGACCAGAAAGACCTATTGCAAGGGTAAGCAATGCAGAAAGCACACCCAACACAAGGTCACCCAATACAAGGCGGGTAAGGCCTCTCTCTTTGCCCAAGGGAAGAGAAGATATGACCGGAAGCAATCTGGTTACGGTGGTCAAACCAAGCCCGTGTTCCACAAGAAGGCCAAGACTACCAAGAAGGTTGTGTTGAGATTGGAATGTGTTGTTTGTAAGACCAAGGCTCAACTCTCTTTGAAGAGATGTAAGCACTTTGAATTGGGTGGTGACAAGAAGCAAAAGGGTCAAGCCTTGCAATTCTAG	ATGGTTAACGTTCCTAAGACCAGAAAGACCTATTGCAAGGGTAAGCAATGCAGAAAGCACACCCAACACAAGGTCACCCAATACAAGGCGGGTAAGGCCTCTCTCTTTGCCCAAGGGAAGAGAAGATATGACCGGAAGCAATCTGGTTACGGTGGTCAAACCAAGCCCGTGTTCCACAAGAAGGCCAAGACTACCAAGAAGGTTGTGTTGAGATTGGAATGTGTTGTTTGTAAGACCAAGGCTCAACTCTCTTTGAAGAGATGTAAGCACTTTGAATTGGGTGGTGACAAGAAGCAAAAGGGTCAAGCCTTGCAATTCTAG	151		151	GGTGGTCAAACCAAG	VALID	CCC	Proline
yHMPu5000038070_diutina_ranongensis_170912_g001207.m1	4236	ATGGTTAACGTTCCCAAGACCAGAAAGACCTATTGCAAGGGTAAGCAATGCAGAAAGCACACCCAACACAAGGTCACCCAATACAAGGCTGGTAAGGCTTCCCTCTTTGCCCAAGGTAAGAGAAGATATGACCGGAAGCAATCCGGTTATGGTGGTCAAACCAAGCCCGTTTTCCACAAGAAGGCTAAGACCACCAAGAAGGTTGTTTTGAGATTGGAATGTGTCGTTTGTAAGACCAAGGCTCAACTTTCTTTGAAGAGATGTAAGCACTTTGAATTGGGTGGTGACAAGAAGCAAAAGGGGCAAGCCTTGCAATTCTAG	ATGGTTAACGTTCCCAAGACCAGAAAGACCTATTGCAAGGGTAAGCAATGCAGAAAGCACACCCAACACAAGGTCACCCAATACAAGGCTGGTAAGGCTTCCCTCTTTGCCCAAGGTAAGAGAAGATATGACCGGAAGCAATCCGGTTATGGTGGTCAAACCAAGCCCGTTTTCCACAAGAAGGCTAAGACCACCAAGAAGGTTGTTTTGAGATTGGAATGTGTCGTTTGTAAGACCAAGGCTCAACTTTCTTTGAAGAGATGTAAGCACTTTGAATTGGGTGGTGACAAGAAGCAAAAGGGGCAAGCCTTGCAATTCTAG	151		151	GGTGGTCAAACCAAG	VALID	CCC	Proline
yHMPu5000038071_diutina_scorzettiae_170912_g004480.m1	4236	ATGGTCAACGTTCCCAAGACTAGAAAGACTTACTGTAAGGGTAAGCAGTGCAAGAAGCACACCCAACACAAGGTTACCCAATACAAGGCTGGTAAGGCTTCGTTGTTTGCCCAAGGTAAGAGAAGATACGACCGGAAGCAATCCGGTTACGGTGGTCAAACCAAGCCCGTTTTCCACAAGAAGGCCAAGACCACCAAGAAGGTTGTCTTGAGATTGGAATGTGTCGTGTGTAAGACCAAGGCCCAACTTTCGTTGAAGAGATGTAAGCACTTCGAATTGGGTGGTGACAAGAAGCAAAAGGGGCAAGCCTTGCAATTCTAG	ATGGTCAACGTTCCCAAGACTAGAAAGACTTACTGTAAGGGTAAGCAGTGCAAGAAGCACACCCAACACAAGGTTACCCAATACAAGGCTGGTAAGGCTTCGTTGTTTGCCCAAGGTAAGAGAAGATACGACCGGAAGCAATCCGGTTACGGTGGTCAAACCAAGCCCGTTTTCCACAAGAAGGCCAAGACCACCAAGAAGGTTGTCTTGAGATTGGAATGTGTCGTGTGTAAGACCAAGGCCCAACTTTCGTTGAAGAGATGTAAGCACTTCGAATTGGGTGGTGACAAGAAGCAAAAGGGGCAAGCCTTGCAATTCTAG	151		151	GGTGGTCAAACCAAG	VALID	CCC	Proline
yHMPu5000026056_candida_railenensis_201018_g000488.m1	4236	ATGGTTAACGTTCCAAAGACCAGAAAGACCTACTGTAAGGGTAAGCAATGTCGTAAGCACACTCAACATAAGGTTACTCAATACAAGGCTGGTAAGGCTTCCTTATTCGCCCAAGGTAAGAGAAGATATGACCGTAAGCAATCTGGTTTCGGTGGTCAAACCAAGCCAGTTTTCCACAAGAAGGCTAAGACTACCAAGAAGGTTGTCTTAAGATTAGAATGTGTTGTCTGTAAGACCAAGGCTCAATTATCTTTAAAGAGATGTAAGCATTTCGAATTAGGTGGTGACAAGAAGCAAAAGGGTCAAGCCTTACAATTTTAA	ATGGTTAACGTTCCAAAGACCAGAAAGACCTACTGTAAGGGTAAGCAATGTCGTAAGCACACTCAACATAAGGTTACTCAATACAAGGCTGGTAAGGCTTCCTTATTCGCCCAAGGTAAGAGAAGATATGACCGTAAGCAATCTGGTTTCGGTGGTCAAACCAAGCCAGTTTTCCACAAGAAGGCTAAGACTACCAAGAAGGTTGTCTTAAGATTAGAATGTGTTGTCTGTAAGACCAAGGCTCAATTATCTTTAAAGAGATGTAAGCATTTCGAATTAGGTGGTGACAAGAAGCAAAAGGGTCAAGCCTTACAATTTTAA	151		151	GGTGGTCAAACCAAG	VALID	CCA	Proline
yHMPu5000034642_candida_zeylanoides_160519_g000162.m1	4236	ATGGTTAACGTTCCAAAGACCAGAAAGACCTACTGCAAGGGCAAGCAATGCCGTAAGCACACCCAGCACAAGGTTACTCAATACAAGGCTGGTAAGGCTTCCTTGTTCGCTCAGGGTAAGAGAAGATACGACCGTAAGCAGTCTGGTTTCGGTGGTCAGACCAAGCCCGTTTTTCACAAGAAGGCTAAGACCACCAAGAAGGTTGTCTTGAGATTGGAGTGTGTTGTGTGCAAGACCAAGGCTCAGTTGTCCTTGAAGAGATGCAAGCACTTCGAGTTGGGTGGTGACAAGAAGCAGAAGGGTCAAGCCTTGCAGTTCTAA	ATGGTTAACGTTCCAAAGACCAGAAAGACCTACTGCAAGGGCAAGCAATGCCGTAAGCACACCCAGCACAAGGTTACTCAATACAAGGCTGGTAAGGCTTCCTTGTTCGCTCAGGGTAAGAGAAGATACGACCGTAAGCAGTCTGGTTTCGGTGGTCAGACCAAGCCCGTTTTTCACAAGAAGGCTAAGACCACCAAGAAGGTTGTCTTGAGATTGGAGTGTGTTGTGTGCAAGACCAAGGCTCAGTTGTCCTTGAAGAGATGCAAGCACTTCGAGTTGGGTGGTGACAAGAAGCAGAAGGGTCAAGCCTTGCAGTTCTAA	#VALUE!	151	#VALUE!	#VALUE!	#VALUE!	#VALUE!	#VALUE!
yHMPu5000034644_candida_quercitrusa_170307_g004082.m1	4236	ATGGTTAACGTTCCAAAGACCAGAAAGACCTACTGTAAGGGTAAGCAGTGCAGAAAGCACACCCAGCACAAGGTTACTCAGTACAAGGCTGGTAAGGCTTCCCTTTTCGCCCAAGGTAAGAGAAGATATGACCGTAAGCAGTCTGGTTTCGGTGGTCAAACCAAGCCAGTTTTCCACAAGAAGGCCAAGACTACCAAGAAGGTTGTCTTGAGATTGGAATGTGTTGTCTGCAAGACCAAGGCTCAACTTTCCTTGAAGAGATGTAAGCACTTCGAATTGGGTGGTGACAAGAAGCAAAAGGGTCAAGCCTTGCAATTTTAA	ATGGTTAACGTTCCAAAGACCAGAAAGACCTACTGTAAGGGTAAGCAGTGCAGAAAGCACACCCAGCACAAGGTTACTCAGTACAAGGCTGGTAAGGCTTCCCTTTTCGCCCAAGGTAAGAGAAGATATGACCGTAAGCAGTCTGGTTTCGGTGGTCAAACCAAGCCAGTTTTCCACAAGAAGGCCAAGACTACCAAGAAGGTTGTCTTGAGATTGGAATGTGTTGTCTGCAAGACCAAGGCTCAACTTTCCTTGAAGAGATGTAAGCACTTCGAATTGGGTGGTGACAAGAAGCAAAAGGGTCAAGCCTTGCAATTTTAA	151		151	GGTGGTCAAACCAAG	VALID	CCA	Proline
yHMPu5000034883_peterozyma_xylosa_160519_g005833.m1	4236	ATGGTTAACGTTCCAAAGACAAGAAAAACTTACTGTAAGGGTAAGCAATGCAGAAAGCACACCCAACACAAGGTTACCCAATACAAGGCCGGTAAAGCTTCTTTATTCGCTCAAGGTAAGAGACGTTATGACCGTAAACAATCTGGTTTCGGTGGTCAAACCAAGCCAGTTTTCCACAAGAAGGCTAAGACTACCAAGAAGGTTGTCTTGAGATTGGAATGTGTTGTCTGTAAGACCAAGGCTCAATTATCATTGAAGAGATGTAAGCACTTCGAATTGGGTGGTGATAAGAAACAAAAGGGTCAAGCTTTACAATTTTAA	ATGGTTAACGTTCCAAAGACAAGAAAAACTTACTGTAAGGGTAAGCAATGCAGAAAGCACACCCAACACAAGGTTACCCAATACAAGGCCGGTAAAGCTTCTTTATTCGCTCAAGGTAAGAGACGTTATGACCGTAAACAATCTGGTTTCGGTGGTCAAACCAAGCCAGTTTTCCACAAGAAGGCTAAGACTACCAAGAAGGTTGTCTTGAGATTGGAATGTGTTGTCTGTAAGACCAAGGCTCAATTATCATTGAAGAGATGTAAGCACTTCGAATTGGGTGGTGATAAGAAACAAAAGGGTCAAGCTTTACAATTTTAA	151		151	GGTGGTCAAACCAAG	VALID	CCA	Proline
yHMPu5000034884_peterozyma_toletana_160519_g005665.m1	4236	ATGGTTAACGTTCCAAAGACCAGAAAAACTTACTGTAAGGGTAAGCAATGCAGAAAGCACACCCAACACAAGGTTACCCAATACAAGGCGGGTAAAGCTTCTTTATTCGCCCAAGGTAAGAGACGTTATGACCGTAAACAATCTGGTTTCGGTGGTCAAACCAAGCCAGTTTTCCACAAGAAGGCTAAGACTACCAAGAAGGTTGTCTTGAGATTGGAATGTGTTGTCTGTAAGACCAAGGCTCAATTATCATTGAAGAGATGTAAGCACTTCGAATTAGGTGGTGATAAGAAACAAAAGGGTCAAGCTTTACAATTTTAA	ATGGTTAACGTTCCAAAGACCAGAAAAACTTACTGTAAGGGTAAGCAATGCAGAAAGCACACCCAACACAAGGTTACCCAATACAAGGCGGGTAAAGCTTCTTTATTCGCCCAAGGTAAGAGACGTTATGACCGTAAACAATCTGGTTTCGGTGGTCAAACCAAGCCAGTTTTCCACAAGAAGGCTAAGACTACCAAGAAGGTTGTCTTGAGATTGGAATGTGTTGTCTGTAAGACCAAGGCTCAATTATCATTGAAGAGATGTAAGCACTTCGAATTAGGTGGTGATAAGAAACAAAAGGGTCAAGCTTTACAATTTTAA	151		151	GGTGGTCAAACCAAG	VALID	CCA	Proline
yHMPu5000038115_candida_aurita_170912_g000124.m1	4236	ATGGTTAACGTTCCAAAGACCAGAAAGACCTACTGTAAGGGTAAGCAATGCCGTAAACACACCCAACACAAGGTTACTCAATACAAGGCTGGTAAGGCTTCCTTATTCGCTCAAGGTAAGAGAAGATATGACCGTAAACAATCTGGTTTCGGTGGTCAAACCAAACCAGTTTTCCACAAGAAAGCTAAGACTACCAAGAAAGTTGTTTTAAGATTAGAATGTGTTGTCTGTAAGACCAAGGCTCAATTATCCTTAAAGAGATGTAAGCATTTCGAATTAGGTGGTGACAAGAAACAAAAGGGTCAAGCTTTACAATTTTAA	ATGGTTAACGTTCCAAAGACCAGAAAGACCTACTGTAAGGGTAAGCAATGCCGTAAACACACCCAACACAAGGTTACTCAATACAAGGCTGGTAAGGCTTCCTTATTCGCTCAAGGTAAGAGAAGATATGACCGTAAACAATCTGGTTTCGGTGGTCAAACCAAACCAGTTTTCCACAAGAAAGCTAAGACTACCAAGAAAGTTGTTTTAAGATTAGAATGTGTTGTCTGTAAGACCAAGGCTCAATTATCCTTAAAGAGATGTAAGCATTTCGAATTAGGTGGTGACAAGAAACAAAAGGGTCAAGCTTTACAATTTTAA	151		151	GGTGGTCAAACCAAA	VALID	CCA	Proline
yHMPu5000038324_scheffersomyces_gosingicus_180604_g005899.m1	4236	ATGGTTAACGTTCCAAAGACTAGAAAGACCTACTGTAAGGGTAAGCAGTGCAGAAAGCACACCCAACACAAGGTGACCCAATATAAGGCTGGTAAGGCCTCCTTGTTCGCTCAAGGTAAGAGAAGATATGACCGTAAGCAAAGCGGTTTCGGTGGTCAAACCAAGCCTGTCTTCCACAAGAAGGCTAAGACTACCAAGAAGGTTGTCTTGAGATTGGAATGTGTTGTCTGCAAGACCAAGGCTCAATTGTCCTTGAAGAGATGTAAGCACTTCGAATTGGGTGGTGACAAGAAGCAAAAGGGTCAAGCCTTGCAATTCTAA	ATGGTTAACGTTCCAAAGACTAGAAAGACCTACTGTAAGGGTAAGCAGTGCAGAAAGCACACCCAACACAAGGTGACCCAATATAAGGCTGGTAAGGCCTCCTTGTTCGCTCAAGGTAAGAGAAGATATGACCGTAAGCAAAGCGGTTTCGGTGGTCAAACCAAGCCTGTCTTCCACAAGAAGGCTAAGACTACCAAGAAGGTTGTCTTGAGATTGGAATGTGTTGTCTGCAAGACCAAGGCTCAATTGTCCTTGAAGAGATGTAAGCACTTCGAATTGGGTGGTGACAAGAAGCAAAAGGGTCAAGCCTTGCAATTCTAA	151		151	GGTGGTCAAACCAAG	VALID	CCT	Proline
yHMPu5000038372_candida_oleophila_170713_g002898.m1	4236	ATGGTTAACGTTCCAAAGACCAGAAAGACCTACTGTAAGGGTAAGCAATGTCGTAAGCACACTCAACACAAGGTTACTCAATACAAGGCTGGTAAGGCTTCCTTATTCGCCCAAGGTAAGAGAAGATATGACCGTAAGCAATCTGGTTTCGGTGGTCAAACCAAGCCAGTTTTCCACAAGAAAGCTAAGACTACCAAGAAGGTTGTCTTGAGATTAGAATGTGTTGTCTGTAAGACCAAGGCTCAATTATCTTTAAAGAGATGTAAGCATTTCGAATTAGGTGGTGACAAGAAGCAAAAGGGTCAAGCCTTACAATTTTAA	ATGGTTAACGTTCCAAAGACCAGAAAGACCTACTGTAAGGGTAAGCAATGTCGTAAGCACACTCAACACAAGGTTACTCAATACAAGGCTGGTAAGGCTTCCTTATTCGCCCAAGGTAAGAGAAGATATGACCGTAAGCAATCTGGTTTCGGTGGTCAAACCAAGCCAGTTTTCCACAAGAAAGCTAAGACTACCAAGAAGGTTGTCTTGAGATTAGAATGTGTTGTCTGTAAGACCAAGGCTCAATTATCTTTAAAGAGATGTAAGCATTTCGAATTAGGTGGTGACAAGAAGCAAAAGGGTCAAGCCTTACAATTTTAA	151		151	GGTGGTCAAACCAAG	VALID	CCA	Proline
yHMPu5000034656_candida_glaebosa_170307_g001123.m1	4236	ATGGTGAACGTTCCAAAGACTAGAAAGACCTATTGTAAGGGTAAACAATGCAGAAAACACACCCAACATAAAGTTACTCAATACAAAGCCGGTAAAGCTTCTTTATTCGCTCAAGGTAAGAGAAGATATGACAGAAAACAATCCGGTTTCGGTGGTCAAACCAAACCAGTTTTCCACAAGAAAGCTAAAACTACTAAAAAAGTTGTCTTAAGATTGGAATGTATTGTCTGCAAAACCAAAGCTCAATTATCTTTGAAAAGATGTAAACATTTCGAGTTAGGTGGTGATAAAAAACAAAAAGGTCAAGCCTTACAATTTTAA	ATGGTGAACGTTCCAAAGACTAGAAAGACCTATTGTAAGGGTAAACAATGCAGAAAACACACCCAACATAAAGTTACTCAATACAAAGCCGGTAAAGCTTCTTTATTCGCTCAAGGTAAGAGAAGATATGACAGAAAACAATCCGGTTTCGGTGGTCAAACCAAACCAGTTTTCCACAAGAAAGCTAAAACTACTAAAAAAGTTGTCTTAAGATTGGAATGTATTGTCTGCAAAACCAAAGCTCAATTATCTTTGAAAAGATGTAAACATTTCGAGTTAGGTGGTGATAAAAAACAAAAAGGTCAAGCCTTACAATTTTAA	151		151	GGTGGTCAAACCAAA	VALID	CCA	Proline
yHMPu5000035667_kurtzmaniella_cleridarum_180604_g002655.m1	4236	ATGGTTAACGTTCCAAAGACCAGAAAGACTTACTGTAAGGGTAAACAATGCAGAAAGCACACCCAACACAAGGTTACTCAGTACAAGGCTGGTAAGGCTTCTCTCTTTGCCCAAGGTAAGAGAAGATATGACCGTAAGCAATCCGGTTTCGGTGGTCAAACCAAGCCAGTTTTCCACAAGAAAGCTAAGACCACCAAGAAGGTTGTTTTAAGATTGGAATGTATTGTCTGTAAGACCAAGGCTCAACTCTCCTTAAAGAGATGTAAGCATTTCGAATTAGGTGGTGACAAGAAGCAAAAGGGTCAAGCCTTACAATTTTAA	ATGGTTAACGTTCCAAAGACCAGAAAGACTTACTGTAAGGGTAAACAATGCAGAAAGCACACCCAACACAAGGTTACTCAGTACAAGGCTGGTAAGGCTTCTCTCTTTGCCCAAGGTAAGAGAAGATATGACCGTAAGCAATCCGGTTTCGGTGGTCAAACCAAGCCAGTTTTCCACAAGAAAGCTAAGACCACCAAGAAGGTTGTTTTAAGATTGGAATGTATTGTCTGTAAGACCAAGGCTCAACTCTCCTTAAAGAGATGTAAGCATTTCGAATTAGGTGGTGACAAGAAGCAAAAGGGTCAAGCCTTACAATTTTAA	151		151	GGTGGTCAAACCAAG	VALID	CCA	Proline
yHMPu5000037230_kodamaea_jinghongensis_210210_g003120.m1	4236	ATGGTTAACGTTCCAAAAACTAGAAAGACCTACTGTAAGGGTAAGCAATGTAAGAAGCACACCCAACACAAGGTTACTCAATACAAGGCTGGTAAGGCCTCCTTGTTCGCTCAAGGTAAGAGAAGATATGACAGAAAGCAATCTGGTTTCGGTGGTCAAACCAAGCCTGTCTTCCACAAGAAGGCTAAGACTACCAAGAAGGTTGTCTTGAGATTGGAATGTGTTGTTTGCAAGACTAAGGCTCAATTGTCCTTGAAGAGATGTAAGCACTTCGAATTGGGTGGTGACAAGAAGCAAAAGGGTCAAGCTTTGCAATTCTAA	ATGGTTAACGTTCCAAAAACTAGAAAGACCTACTGTAAGGGTAAGCAATGTAAGAAGCACACCCAACACAAGGTTACTCAATACAAGGCTGGTAAGGCCTCCTTGTTCGCTCAAGGTAAGAGAAGATATGACAGAAAGCAATCTGGTTTCGGTGGTCAAACCAAGCCTGTCTTCCACAAGAAGGCTAAGACTACCAAGAAGGTTGTCTTGAGATTGGAATGTGTTGTTTGCAAGACTAAGGCTCAATTGTCCTTGAAGAGATGTAAGCACTTCGAATTGGGTGGTGACAAGAAGCAAAAGGGTCAAGCTTTGCAATTCTAA	151		151	GGTGGTCAAACCAAG	VALID	CCT	Proline
yHMPu5000037908_candida_fukazawae_180604_g002886.m1	4236	ATGGTTAACGTTCCAAAAACTAGAAAGACCTACTGTAAGGGTAAGCAATGTAAGAAGCACACCCAACACAAGGTTACTCAATACAAGGCCGGTAAGGCTTCCTTGTTCGCCCAAGGTAAGAGAAGATATGACAGAAAGCAATCCGGTTTCGGTGGTCAAACCAAGCCTGTCTTCCACAAGAAGGCTAAGACCACCAAGAAGGTTGTCTTGAGATTGGAATGTGTTGTTTGCAAGACCAAGGCTCAATTGTCCTTGAAGAGATGTAAGCACTTCGAATTGGGTGGTGACAAGAAGCAAAAGGGTCAAGCTTTGCAATTCTAA	ATGGTTAACGTTCCAAAAACTAGAAAGACCTACTGTAAGGGTAAGCAATGTAAGAAGCACACCCAACACAAGGTTACTCAATACAAGGCCGGTAAGGCTTCCTTGTTCGCCCAAGGTAAGAGAAGATATGACAGAAAGCAATCCGGTTTCGGTGGTCAAACCAAGCCTGTCTTCCACAAGAAGGCTAAGACCACCAAGAAGGTTGTCTTGAGATTGGAATGTGTTGTTTGCAAGACCAAGGCTCAATTGTCCTTGAAGAGATGTAAGCACTTCGAATTGGGTGGTGACAAGAAGCAAAAGGGTCAAGCTTTGCAATTCTAA	151		151	GGTGGTCAAACCAAG	VALID	CCT	Proline
candida_sojae_g004157.m1	4236	ATGGTTAACGTTCCAAAAACTAGAAAGACCTACTGTAAAGGTAAAGAATGTCGTAAACACACTCAACACAAAGTTACCCAATACAAAGCTGGTAAATCATCTTTATTCGCTCAAGGTAAGAGAAGATATGACAGAAAACAATCCGGTTTTGGTGGTCAAACTAAACCAGTTTTCCACAAAAAGGCTAAAACTACCAAGAAAGTTGTCTTGAGATTGGAATGTGTTGTCTGTAAAACCAAAGCTCAATTGTCTTTGAAGAGATGTAAACATTTCGAATTGGGTGGTGACAAAAAACAAAAAGGTCAAGCTTTACAATTCTAA	ATGGTTAACGTTCCAAAAACTAGAAAGACCTACTGTAAAGGTAAAGAATGTCGTAAACACACTCAACACAAAGTTACCCAATACAAAGCTGGTAAATCATCTTTATTCGCTCAAGGTAAGAGAAGATATGACAGAAAACAATCCGGTTTTGGTGGTCAAACTAAACCAGTTTTCCACAAAAAGGCTAAAACTACCAAGAAAGTTGTCTTGAGATTGGAATGTGTTGTCTGTAAAACCAAAGCTCAATTGTCTTTGAAGAGATGTAAACATTTCGAATTGGGTGGTGACAAAAAACAAAAAGGTCAAGCTTTACAATTCTAA	151		151	GGTGGTCAAACTAAA	VALID	CCA	Proline
candida_tropicalis_g003838.m1	4236	ATGGTTAACGTTCCAAAAACTAGAAAGACCTACTGTAAAGGTAAAGAATGTCGTAAACACACTCAACACAAAGTTACCCAATACAAAGCTGGTAAATCATCTTTATTCGCTCAAGGTAAGAGAAGATATGACAGAAAACAATCCGGTTTTGGTGGTCAAACTAAACCAGTTTTCCACAAAAAGGCTAAGACTACCAAGAAAGTTGTTTTGAGATTGGAATGTGTTGTCTGTAAAACCAAGGCTCAATTATCCTTGAAGAGATGTAAACATTTCGAATTGGGTGGTGATAAAAAACAAAAAGGTCAAGCTTTACAATTCTAA	ATGGTTAACGTTCCAAAAACTAGAAAGACCTACTGTAAAGGTAAAGAATGTCGTAAACACACTCAACACAAAGTTACCCAATACAAAGCTGGTAAATCATCTTTATTCGCTCAAGGTAAGAGAAGATATGACAGAAAACAATCCGGTTTTGGTGGTCAAACTAAACCAGTTTTCCACAAAAAGGCTAAGACTACCAAGAAAGTTGTTTTGAGATTGGAATGTGTTGTCTGTAAAACCAAGGCTCAATTATCCTTGAAGAGATGTAAACATTTCGAATTGGGTGGTGATAAAAAACAAAAAGGTCAAGCTTTACAATTCTAA	151		151	GGTGGTCAAACTAAA	VALID	CCA	Proline
spathaspora_boniae_g003816.m1	4236	ATGGTTAACGTTCCAAAGACCAGAAAGACCTACTGCAAGGGTAAGGAGTGCCGCAAACACACCCAGCACAAGGTGACCCAATACAAGGCCGGCAAGTCCTCTCTCTTCGCCCAGGGTAAGAGAAGATACGACAGAAAGCAGTCTGGTTTCGGTGGTCAGACCAAGCCAGTGTTCCACAAGAAGGCCAAGACTACCAAGAAGGTTGTCTTGAGATTGGAATGTGTTGTTTGCAAGACCAAGGCCCAGTTGTCCTTGAAGAGATGCAAGCACTTCGAGTTGGGTGGTGACAAGAAGCAGAAGGGCCAGGCCTTGCAGTTCTAA	ATGGTTAACGTTCCAAAGACCAGAAAGACCTACTGCAAGGGTAAGGAGTGCCGCAAACACACCCAGCACAAGGTGACCCAATACAAGGCCGGCAAGTCCTCTCTCTTCGCCCAGGGTAAGAGAAGATACGACAGAAAGCAGTCTGGTTTCGGTGGTCAGACCAAGCCAGTGTTCCACAAGAAGGCCAAGACTACCAAGAAGGTTGTCTTGAGATTGGAATGTGTTGTTTGCAAGACCAAGGCCCAGTTGTCCTTGAAGAGATGCAAGCACTTCGAGTTGGGTGGTGACAAGAAGCAGAAGGGCCAGGCCTTGCAGTTCTAA	#VALUE!	151	#VALUE!	#VALUE!	#VALUE!	#VALUE!	#VALUE!
yHMPu5000034996_candida_sojae_SPADES_g002694.m1	4236	ATGGTTAACGTTCCAAAAACTAGAAAGACCTACTGTAAAGGTAAAGAATGTCGTAAACACACTCAACACAAAGTTACCCAATACAAAGCTGGTAAATCATCTTTATTCGCTCAAGGTAAGAGAAGATATGACAGAAAACAATCCGGTTTTGGTGGTCAAACTAAACCAGTTTTCCACAAAAAGGCTAAGACTACCAAGAAAGTTGTCTTGAGATTGGAATGTGTTGTCTGTAAAACCAAAGCTCAATTGTCTTTGAAGAGATGTAAACATTTCGAATTGGGTGGTGACAAAAAACAAAAAGGTCAAGCTTTACAATTCTAA	ATGGTTAACGTTCCAAAAACTAGAAAGACCTACTGTAAAGGTAAAGAATGTCGTAAACACACTCAACACAAAGTTACCCAATACAAAGCTGGTAAATCATCTTTATTCGCTCAAGGTAAGAGAAGATATGACAGAAAACAATCCGGTTTTGGTGGTCAAACTAAACCAGTTTTCCACAAAAAGGCTAAGACTACCAAGAAAGTTGTCTTGAGATTGGAATGTGTTGTCTGTAAAACCAAAGCTCAATTGTCTTTGAAGAGATGTAAACATTTCGAATTGGGTGGTGACAAAAAACAAAAAGGTCAAGCTTTACAATTCTAA	151		151	GGTGGTCAAACTAAA	VALID	CCA	Proline
yHMPu5000034997_candida_tropicalis_160519.haplomerger2_g000442.m1	4236	ATGGTTAACGTTCCAAAAACTAGAAAGACCTACTGTAAAGGTAAAGAATGTCGTAAACACACTCAACACAAAGTTACCCAATACAAAGCTGGTAAATCATCTTTATTCGCTCAAGGTAAGAGAAGATATGACAGAAAACAATCCGGTTTTGGTGGTCAAACTAAACCAGTTTTCCACAAAAAGGCTAAGACTACCAAGAAAGTTGTTTTGAGATTGGAATGTGTTGTCTGTAAAACCAAGGCTCAATTATCCTTGAAGAGATGTAAACATTTCGAATTGGGTGGTGATAAAAAACAAAAAGGTCAAGCTTTACAATTCTAA	ATGGTTAACGTTCCAAAAACTAGAAAGACCTACTGTAAAGGTAAAGAATGTCGTAAACACACTCAACACAAAGTTACCCAATACAAAGCTGGTAAATCATCTTTATTCGCTCAAGGTAAGAGAAGATATGACAGAAAACAATCCGGTTTTGGTGGTCAAACTAAACCAGTTTTCCACAAAAAGGCTAAGACTACCAAGAAAGTTGTTTTGAGATTGGAATGTGTTGTCTGTAAAACCAAGGCTCAATTATCCTTGAAGAGATGTAAACATTTCGAATTGGGTGGTGATAAAAAACAAAAAGGTCAAGCTTTACAATTCTAA	151		151	GGTGGTCAAACTAAA	VALID	CCA	Proline
yHMPu5000037250_candida_pseudoviswanathii_210210_g002196.m1	4236	ATGGTTAACGTTCCAAAAACTAGAAAGACCTACTGCAAAGGTAAAGAATGTCGTAAACACACTCAACACAAGGTCACCCAATACAAAGCCGGTAAGTCCTCCTTGTTTGCTCAAGGTAAGAGAAGATATGACAGAAAGCAATCCGGTTTCGGTGGTCAAACCAAGCCAGTTTTCCACAAGAAGGCCAAGACCACCAAGAAGGTTGTCTTGAGATTGGAATGTGTCGTCTGCAAAACCAAAGCTCAATTGTCCTTGAAGAGATGTAAGCACTTCGAATTGGGTGGTGACAAGAAACAAAAGGGTCAAGCTTTACAATTCTAG	ATGGTTAACGTTCCAAAAACTAGAAAGACCTACTGCAAAGGTAAAGAATGTCGTAAACACACTCAACACAAGGTCACCCAATACAAAGCCGGTAAGTCCTCCTTGTTTGCTCAAGGTAAGAGAAGATATGACAGAAAGCAATCCGGTTTCGGTGGTCAAACCAAGCCAGTTTTCCACAAGAAGGCCAAGACCACCAAGAAGGTTGTCTTGAGATTGGAATGTGTCGTCTGCAAAACCAAAGCTCAATTGTCCTTGAAGAGATGTAAGCACTTCGAATTGGGTGGTGACAAGAAACAAAAGGGTCAAGCTTTACAATTCTAG	151		151	GGTGGTCAAACCAAG	VALID	CCA	Proline
yHMPu5000037900_candida_labiduridarum_190924_g005655.m1	4236	ATGGTTAACGTTCCAAAAACTAGAAAGACCTACTGTAAAGGTAAAGAATGTCGTAAACACACTCAACACAAAGTTACCCAATACAAAGCTGGTAAATCATCTTTATTCGCTCAAGGTAAGAGAAGATATGACAGAAAACAATCCGGTTTTGGTGGTCAAACCAAACCAGTTTTCCACAAAAAGGCTAAGACTACCAAGAAAGTTGTTTTGAGATTGGAATGTGTTGTCTGTAAGACCAAAGCTCAATTGTCCTTGAAGAGATGTAAACATTTCGAATTGGGTGGTGATAAAAAACAAAAAGGTCAAGCTTTACAATTCTAA	ATGGTTAACGTTCCAAAAACTAGAAAGACCTACTGTAAAGGTAAAGAATGTCGTAAACACACTCAACACAAAGTTACCCAATACAAAGCTGGTAAATCATCTTTATTCGCTCAAGGTAAGAGAAGATATGACAGAAAACAATCCGGTTTTGGTGGTCAAACCAAACCAGTTTTCCACAAAAAGGCTAAGACTACCAAGAAAGTTGTTTTGAGATTGGAATGTGTTGTCTGTAAGACCAAAGCTCAATTGTCCTTGAAGAGATGTAAACATTTCGAATTGGGTGGTGATAAAAAACAAAAAGGTCAAGCTTTACAATTCTAA	151		151	GGTGGTCAAACCAAA	VALID	CCA	Proline
yHMPu5000038349_candida_viswanathii_170713.haplomerger2_g000461.m1	4236	ATGGTTAACGTTCCAAAAACTAGAAAGACCTACTGCAAAGGTAAAGAATGTCGTAAACACACTCAACACAAGGTCACCCAATACAAAGCCGGTAAGTCCTCCTTGTTTGCTCAAGGTAAGAGAAGATATGACAGAAAGCAATCCGGTTTCGGTGGTCAAACCAAGCCAGTTTTCCACAAGAAGGCCAAGACCACCAAGAAGGTTGTCTTGAGATTGGAATGTGTCGTCTGCAAAACCAAAGCTCAATTGTCCTTGAAGAGATGTAAGCACTTCGAATTGGGTGGTGACAAGAAACAAAAGGGTCAAGCTTTACAATTCTAA	ATGGTTAACGTTCCAAAAACTAGAAAGACCTACTGCAAAGGTAAAGAATGTCGTAAACACACTCAACACAAGGTCACCCAATACAAAGCCGGTAAGTCCTCCTTGTTTGCTCAAGGTAAGAGAAGATATGACAGAAAGCAATCCGGTTTCGGTGGTCAAACCAAGCCAGTTTTCCACAAGAAGGCCAAGACCACCAAGAAGGTTGTCTTGAGATTGGAATGTGTCGTCTGCAAAACCAAAGCTCAATTGTCCTTGAAGAGATGTAAGCACTTCGAATTGGGTGGTGACAAGAAACAAAAGGGTCAAGCTTTACAATTCTAA	151		151	GGTGGTCAAACCAAG	VALID	CCA	Proline
yHMPu5000038350_candida_sanyaensis_180604.haplomerger2_g002497.m1	4236	ATGGTTAACGTTCCAAAAACTAGAAAGACCTACTGTAAAGGTAAAGAATGTCGTAAACACACTCAACACAAAGTTACCCAATACAAAGCTGGTAAATCATCTTTATTCGCTCAAGGTAAGAGAAGATATGACAGAAAACAATCCGGTTTTGGTGGTCAAACTAAACCAGTTTTCCACAAAAAGGCTAAGACTACCAAGAAAGTTGTCTTGAGATTGGAATGTGTTGTCTGTAAAACCAAAGCTCAATTATCCTTGAAGAGATGTAAACATTTCGAATTGGGTGGTGACAAAAAACAAAAAGGTCAAGCTTTACAATTCTAA	ATGGTTAACGTTCCAAAAACTAGAAAGACCTACTGTAAAGGTAAAGAATGTCGTAAACACACTCAACACAAAGTTACCCAATACAAAGCTGGTAAATCATCTTTATTCGCTCAAGGTAAGAGAAGATATGACAGAAAACAATCCGGTTTTGGTGGTCAAACTAAACCAGTTTTCCACAAAAAGGCTAAGACTACCAAGAAAGTTGTCTTGAGATTGGAATGTGTTGTCTGTAAAACCAAAGCTCAATTATCCTTGAAGAGATGTAAACATTTCGAATTGGGTGGTGACAAAAAACAAAAAGGTCAAGCTTTACAATTCTAA	151		151	GGTGGTCAAACTAAA	VALID	CCA	Proline
yHMPu5000035714_candida_frijolesensis_160519.haplomerger2_g000831.m1	4236	ATGGGAAATCAGCAACCAATTTTGGAACATTGTAATACTAACATCATTTTGCTTTTAGTTAACGTTCCAAAAACTAGAAAGACCTACTGTAAAGGTAAAGAATGTCGTAAACACACTCAACACAAAGTTACCCAATACAAAGCTGGTAAATCATCTTTATTCGCTCAAGGTAAGAGAAGATATGACAGAAAACAATCCGGTTTTGGTGGTCAAACCAAGCCAGTTTTCCACAAAAAGGCTAAGACTACCAAGAAAGTTGTCTTGAGATTGGAATGTGTTGTCTGTAAGACCAAAGCTCAATTGTCCTTGAAGAGATGTAAACATTTCGAATTGGGTGGTGATAAAAAACAAAAAGGTCAAGCTTTACAATTCTAA	ATGGGAAATCAGCAACCAATTTTGGAACATTGTAATACTAACATCATTTTGCTTTTAGTTAACGTTCCAAAAACTAGAAAGACCTACTGTAAAGGTAAAGAATGTCGTAAACACACTCAACACAAAGTTACCCAATACAAAGCTGGTAAATCATCTTTATTCGCTCAAGGTAAGAGAAGATATGACAGAAAACAATCCGGTTTTGGTGGTCAAACCAAGCCAGTTTTCCACAAAAAGGCTAAGACTACCAAGAAAGTTGTCTTGAGATTGGAATGTGTTGTCTGTAAGACCAAAGCTCAATTGTCCTTGAAGAGATGTAAACATTTCGAATTGGGTGGTGATAAAAAACAAAAAGGTCAAGCTTTACAATTCTAA	205		205	GGTGGTCAAACCAAG	VALID	CCA	Proline
yHMPu5000035715_candida_gigantensis_160519.haplomerger2_g002284.m1	4236	ATGGTTAACGTTCCAAAAACTAGAAAGACCTACTGTAAAGGTAGAGAATGTCGTAAACACACTCAACACAAAGTTACCCAATACAAGGCTGGTAAATCATCTTTATTTGCTCAAGGTAAGAGAAGATATGACAGAAAACAATCTGGTTTCGGTGGTCAAACCAAACCAGTTTTCCACAAGAAAGCCAAGACTACCAAAAAAGTTGTTTTGAGATTGGAATGTGTCGTCTGTAAAACCAAGGCTCAATTATCATTGAAAAGATGTAAACATTTCGAATTGGGTGGTGATAAAAAACAAAAAGGTCAAGCTTTACAATTCTAA	ATGGTTAACGTTCCAAAAACTAGAAAGACCTACTGTAAAGGTAGAGAATGTCGTAAACACACTCAACACAAAGTTACCCAATACAAGGCTGGTAAATCATCTTTATTTGCTCAAGGTAAGAGAAGATATGACAGAAAACAATCTGGTTTCGGTGGTCAAACCAAACCAGTTTTCCACAAGAAAGCCAAGACTACCAAAAAAGTTGTTTTGAGATTGGAATGTGTCGTCTGTAAAACCAAGGCTCAATTATCATTGAAAAGATGTAAACATTTCGAATTGGGTGGTGATAAAAAACAAAAAGGTCAAGCTTTACAATTCTAA	151		151	GGTGGTCAAACCAAA	VALID	CCA	Proline
spathaspora_arborariae_g002906.m1	4236	ATGGTTAACGTTCCAAAGACTAGAAAGACCTACTGTAAGGGTAAGGAATGTCGTAAGCACACTCAACACAAGGTTACCCAATACAAGGCCGGTAAAGCCTCATTATTCGCTCAAGGTAAGAGAAGATATGATCGTAAACAATCCGGTTTCGGGGGTCAAACCAAGCCAGTTTTCCACAAGAAGGCCAAGACTACCAAGAAGGTTGTTTTAAGATTAGAATGTGTTGTTTGTAAGACCAAGGCTCAATTATCTTTAAAGAGATGTAAACATTTCGAATTGGGTGGTGACAAGAAACAAAAGGGTCAAGCTTTACAATTCTAG	ATGGTTAACGTTCCAAAGACTAGAAAGACCTACTGTAAGGGTAAGGAATGTCGTAAGCACACTCAACACAAGGTTACCCAATACAAGGCCGGTAAAGCCTCATTATTCGCTCAAGGTAAGAGAAGATATGATCGTAAACAATCCGGTTTCGGGGGTCAAACCAAGCCAGTTTTCCACAAGAAGGCCAAGACTACCAAGAAGGTTGTTTTAAGATTAGAATGTGTTGTTTGTAAGACCAAGGCTCAATTATCTTTAAAGAGATGTAAACATTTCGAATTGGGTGGTGACAAGAAACAAAAGGGTCAAGCTTTACAATTCTAG	151		151	GGGGGTCAAACCAAG	VALID	CCA	Proline
spathaspora_gorwiae_g000587.m1	4236	ATGGTTAACGTCCCAAAAACTAGAAAGACCTACTGTAAGGGTAAGGAATGTCGTAAGCACACCCAACACAAAGTTACCCAATACAAGGCTGGTAAGGCTTCTTTGTTCGCTCAAGGTAAGAGAAGATATGACCGTAAACAATCTGGTTTCGGTGGTCAAACTAAGCCAGTTTTCCACAAGAAAGCTAAGACTACCAAGAAAGTTGTTTTAAGATTAGAATGTGTTGTCTGTAAGACCAAGGCCCAATTATCCTTAAAGAGATGTAAGCACTTCGAATTAGGTGGTGACAAGAAGCAAAAGGGTCAAGCTTTACAATTCTAA	ATGGTTAACGTCCCAAAAACTAGAAAGACCTACTGTAAGGGTAAGGAATGTCGTAAGCACACCCAACACAAAGTTACCCAATACAAGGCTGGTAAGGCTTCTTTGTTCGCTCAAGGTAAGAGAAGATATGACCGTAAACAATCTGGTTTCGGTGGTCAAACTAAGCCAGTTTTCCACAAGAAAGCTAAGACTACCAAGAAAGTTGTTTTAAGATTAGAATGTGTTGTCTGTAAGACCAAGGCCCAATTATCCTTAAAGAGATGTAAGCACTTCGAATTAGGTGGTGACAAGAAGCAAAAGGGTCAAGCTTTACAATTCTAA	151		151	GGTGGTCAAACTAAG	VALID	CCA	Proline
spathaspora_hagerdaliae_g006782.m1	4236	ATGGTTAACGTCCCAAAAACTAGAAAGACCTACTGTAAGGGTAAGGAATGTCGTAAGCACACCCAACACAAAGTTACCCAATACAAGGCTGGTAAGGCTTCTTTGTTCGCTCAAGGTAAGAGAAGATATGACCGTAAACAATCCGGTTTCGGTGGTCAAACTAAGCCAGTTTTCCACAAGAAAGCTAAGACTACCAAGAAAGTTGTTTTAAGATTAGAATGTGTTGTCTGTAAGACCAAGGCCCAATTATCCTTAAAGAGATGTAAGCACTTCGAATTAGGTGGTGACAAGAAGCAAAAGGGTCAAGCTTTACAATTTTAA	ATGGTTAACGTCCCAAAAACTAGAAAGACCTACTGTAAGGGTAAGGAATGTCGTAAGCACACCCAACACAAAGTTACCCAATACAAGGCTGGTAAGGCTTCTTTGTTCGCTCAAGGTAAGAGAAGATATGACCGTAAACAATCCGGTTTCGGTGGTCAAACTAAGCCAGTTTTCCACAAGAAAGCTAAGACTACCAAGAAAGTTGTTTTAAGATTAGAATGTGTTGTCTGTAAGACCAAGGCCCAATTATCCTTAAAGAGATGTAAGCACTTCGAATTAGGTGGTGACAAGAAGCAAAAGGGTCAAGCTTTACAATTTTAA	151		151	GGTGGTCAAACTAAG	VALID	CCA	Proline
yHMPu5000026114_candida_tibetensis_210210_g003379.m1	4236	ATGGTTAACGTTCCAAAGACTAGAAAGACCTACTGTAAGGGTAAGGAATGTCGTAAACACACCCAACACAAAGTTACCCAATATAAGGCTGGTAAAGCTTCCTTATTCGCTCAAGGTAAGAGAAGATATGACCGTAAACAAAGTGGTTTCGGTGGTCAAACTAAGCCAGTTTTCCACAAGAAAGCCAAGACTACCAAGAAGGTTGTCTTGAGATTGGAATGTGTTGTTTGCAAGACCAAGGCTCAATTATCGTTGAAGAGATGTAAGCACTTCGAATTAGGTGGTGACAAGAAGCAAAAGGGTCAAGCCTTACAATTTTAA	ATGGTTAACGTTCCAAAGACTAGAAAGACCTACTGTAAGGGTAAGGAATGTCGTAAACACACCCAACACAAAGTTACCCAATATAAGGCTGGTAAAGCTTCCTTATTCGCTCAAGGTAAGAGAAGATATGACCGTAAACAAAGTGGTTTCGGTGGTCAAACTAAGCCAGTTTTCCACAAGAAAGCCAAGACTACCAAGAAGGTTGTCTTGAGATTGGAATGTGTTGTTTGCAAGACCAAGGCTCAATTATCGTTGAAGAGATGTAAGCACTTCGAATTAGGTGGTGACAAGAAGCAAAAGGGTCAAGCCTTACAATTTTAA	151		151	GGTGGTCAAACTAAG	VALID	CCA	Proline
yHMPu5000034617_spathaspora_passalidarum_170713_g002054.m1	4236	ATGGTTAACGTTCCAAAGACTAGAAAGACCTACTGTAAGGGTAAGGAATGTCGTAAGCACACTCAACACAAGGTTACTCAATACAAGGCCGGTAAAGCCTCTTTATTCGCTCAAGGTAAGAGAAGATATGACCGTAAACAATCCGGTTTCGGTGGTCAAACCAAGCCAGTTTTCCACAAGAAGGCTAAGACTACCAAGAAGGTTGTCTTGAGATTAGAATGTGTCGTCTGTAAGACTAAGGCTCAATTATCTTTGAAGAGATGTAAGCACTTCGAATTGGGTGGTGACAAGAAGCAAAAGGGTCAAGCTTTACAATTCTAG	ATGGTTAACGTTCCAAAGACTAGAAAGACCTACTGTAAGGGTAAGGAATGTCGTAAGCACACTCAACACAAGGTTACTCAATACAAGGCCGGTAAAGCCTCTTTATTCGCTCAAGGTAAGAGAAGATATGACCGTAAACAATCCGGTTTCGGTGGTCAAACCAAGCCAGTTTTCCACAAGAAGGCTAAGACTACCAAGAAGGTTGTCTTGAGATTAGAATGTGTCGTCTGTAAGACTAAGGCTCAATTATCTTTGAAGAGATGTAAGCACTTCGAATTGGGTGGTGACAAGAAGCAAAAGGGTCAAGCTTTACAATTCTAG	151		151	GGTGGTCAAACCAAG	VALID	CCA	Proline
yHMPu5000034648_candida_restingae_160519_g004768.m1	4236	ATGGTTAACGTCCCAAAAACTAGAAAGACCTACTGTAAGGGTAAGGAGTGCCGCAAGCACACCCAGCACAAGGTGACCCAATACAAGGCTGGTAAGGCTTCTTTGTTCGCCCAGGGTAAGAGAAGATATGACAGAAAGCAGTCCGGTTTCGGTGGTCAGACCAAGCCAGTTTTCCACAAGAAGGCTAAGACTACCAAGAAGGTTGTCTTGAGATTGGAGTGTGTTGTTTGCAAGACCAAGGCTCAGCTCTCTTTGAAGAGATGTAAGCACTTCGAGTTGGGTGGTGACAAGAAGCAGAAGGGCCAAGCTTTGCAGTTCTAA	ATGGTTAACGTCCCAAAAACTAGAAAGACCTACTGTAAGGGTAAGGAGTGCCGCAAGCACACCCAGCACAAGGTGACCCAATACAAGGCTGGTAAGGCTTCTTTGTTCGCCCAGGGTAAGAGAAGATATGACAGAAAGCAGTCCGGTTTCGGTGGTCAGACCAAGCCAGTTTTCCACAAGAAGGCTAAGACTACCAAGAAGGTTGTCTTGAGATTGGAGTGTGTTGTTTGCAAGACCAAGGCTCAGCTCTCTTTGAAGAGATGTAAGCACTTCGAGTTGGGTGGTGACAAGAAGCAGAAGGGCCAAGCTTTGCAGTTCTAA	#VALUE!	151	#VALUE!	#VALUE!	#VALUE!	#VALUE!	#VALUE!
yHMPu5000034651_candida_leandrae_170307_g003665.m1	4236	ATGGTTAACGTCCCAAAAACTAGAAAGACCTACTGTAAGGGTAAGGAGTGCCGCAAGCACACCCAGCACAAGGTGACCCAATACAAGGCTGGTAAGGCTTCCTTGTTCGCCCAGGGTAAGAGAAGATATGACAGAAAGCAGTCCGGTTTCGGTGGTCAGACCAAGCCAGTTTTCCACAAGAAGGCTAAGACCACCAAGAAGGTTGTCTTGAGATTGGAGTGTGTTGTCTGCAAGACCAAGGCTCAGTTGTCCTTGAAGAGATGTAAGCACTTCGAATTGGGTGGTGACAAGAAGCAAAAGGGTCAAGCTTTGCAGTTCTAA	ATGGTTAACGTCCCAAAAACTAGAAAGACCTACTGTAAGGGTAAGGAGTGCCGCAAGCACACCCAGCACAAGGTGACCCAATACAAGGCTGGTAAGGCTTCCTTGTTCGCCCAGGGTAAGAGAAGATATGACAGAAAGCAGTCCGGTTTCGGTGGTCAGACCAAGCCAGTTTTCCACAAGAAGGCTAAGACCACCAAGAAGGTTGTCTTGAGATTGGAGTGTGTTGTCTGCAAGACCAAGGCTCAGTTGTCCTTGAAGAGATGTAAGCACTTCGAATTGGGTGGTGACAAGAAGCAAAAGGGTCAAGCTTTGCAGTTCTAA	#VALUE!	151	#VALUE!	#VALUE!	#VALUE!	#VALUE!	#VALUE!
yHMPu5000034664_kodamaea_anthophila_190924_g005522.m1	4236	ATGGTTAACGTCCCAAAAACTAGAAAGACCTACTGTAAGGGTAAGGAGTGCCGCAAGCACACCCAGCACAAGGTGACTCAGTACAAGGCTGGTAAGGCTTCTTTGTTCGCCCAGGGTAAGAGAAGATATGACAGAAAGCAGTCTGGTTTCGGTGGTCAGACCAAGCCAGTTTTCCACAAGAAGGCCAAGACCACCAAGAAGGTTGTCTTGAGATTGGAGTGTGTCGTCTGCAAGACCAAGGCTCAGTTGTCCTTGAAGAGATGTAAGCACTTCGAGTTGGGTGGTGACAAGAAGCAAAAGGGCCAGGCTTTGCAGTTCTAA	ATGGTTAACGTCCCAAAAACTAGAAAGACCTACTGTAAGGGTAAGGAGTGCCGCAAGCACACCCAGCACAAGGTGACTCAGTACAAGGCTGGTAAGGCTTCTTTGTTCGCCCAGGGTAAGAGAAGATATGACAGAAAGCAGTCTGGTTTCGGTGGTCAGACCAAGCCAGTTTTCCACAAGAAGGCCAAGACCACCAAGAAGGTTGTCTTGAGATTGGAGTGTGTCGTCTGCAAGACCAAGGCTCAGTTGTCCTTGAAGAGATGTAAGCACTTCGAGTTGGGTGGTGACAAGAAGCAAAAGGGCCAGGCTTTGCAGTTCTAA	#VALUE!	151	#VALUE!	#VALUE!	#VALUE!	#VALUE!	#VALUE!
yHMPu5000034665_kodamaea_laetipori_180604_g003894.m1	4236	ATGGTTAACGTCCCAAAAACTAGAAAGACCTACTGTAAGGGTAAGGAATGCCGTAAGCACACCCAGCACAAGGTTACCCAATACAAGGCTGGTAAGGCTTCTTTGTTCGCCCAGGGTAAGAGAAGATATGACAGAAAGCAATCTGGTTTCGGTGGTCAAACCAAGCCAGTTTTCCACAAGAAGGCTAAGACTACCAAGAAGGTTGTCTTGAGATTGGAATGTGTTGTCTGCAAGACCAAGGCTCAATTGTCTTTGAAGAGATGTAAGCACTTCGAGTTGGGTGGTGACAAGAAGCAAAAGGGTCAAGCCTTGCAATTTTAG	ATGGTTAACGTCCCAAAAACTAGAAAGACCTACTGTAAGGGTAAGGAATGCCGTAAGCACACCCAGCACAAGGTTACCCAATACAAGGCTGGTAAGGCTTCTTTGTTCGCCCAGGGTAAGAGAAGATATGACAGAAAGCAATCTGGTTTCGGTGGTCAAACCAAGCCAGTTTTCCACAAGAAGGCTAAGACTACCAAGAAGGTTGTCTTGAGATTGGAATGTGTTGTCTGCAAGACCAAGGCTCAATTGTCTTTGAAGAGATGTAAGCACTTCGAGTTGGGTGGTGACAAGAAGCAAAAGGGTCAAGCCTTGCAATTTTAG	151		151	GGTGGTCAAACCAAG	VALID	CCA	Proline
yHMPu5000035303_candida_natalensis_201018_g002357.m1	4236	ATGGTTAACGTTCCAAAGACCAGAAAGACCTACTGTAAGGGTAAGGAATGCAGAAAGCACACCCAACACAAGGTTACCCAGTACAAGGCTGGTAAGGCTTCTCTCTTCGCCCAAGGTAAGAGAAGATATGACCGTAAGCAATCTGGTTTCGGTGGTCAAACCAAGCCAGTTTTCCACAAGAAGGCTAAGACTACCAAGAAGGTTGTCTTGAGATTGGAATGTGTTGTTTGTAAGACCAAGGCTCAACTCTCCTTAAAGAGATGTAAGCACTTCGAATTAGGTGGTGACAAGAAGCAAAAGGGTCAAGCCTTGCAATTTTAA	ATGGTTAACGTTCCAAAGACCAGAAAGACCTACTGTAAGGGTAAGGAATGCAGAAAGCACACCCAACACAAGGTTACCCAGTACAAGGCTGGTAAGGCTTCTCTCTTCGCCCAAGGTAAGAGAAGATATGACCGTAAGCAATCTGGTTTCGGTGGTCAAACCAAGCCAGTTTTCCACAAGAAGGCTAAGACTACCAAGAAGGTTGTCTTGAGATTGGAATGTGTTGTTTGTAAGACCAAGGCTCAACTCTCCTTAAAGAGATGTAAGCACTTCGAATTAGGTGGTGACAAGAAGCAAAAGGGTCAAGCCTTGCAATTTTAA	151		151	GGTGGTCAAACCAAG	VALID	CCA	Proline
yHMPu5000035306_candida_elateridarum_180604_g005569.m1	4236	ATGGTGAACGTTCCAAAGACCAGAAAGACTTATTGCAAGGGTAAGGAGTGCCGTAAGCACACCCAACACAAGGTTACTCAATACAAGGCCGGTAAGGCTTCCTTGTTCGCCCAAGGTAAGAGAAGATATGACCGTAAGCAATCCGGTTTTGGTGGTCAAACCAAGCCAGTTTTCCACAAGAAAGCCAAGACTACCAAGAAGGTCGTCTTGAGATTGGAGTGTGTTGTCTGCAAGACCAAGGCCCAACTTTCCTTGAAGAGATGTAAGCACTTCGAGTTGGGTGGTGACAAGAAGCAGAAGGGTCAAGCTTTGCAATTTTAA	ATGGTGAACGTTCCAAAGACCAGAAAGACTTATTGCAAGGGTAAGGAGTGCCGTAAGCACACCCAACACAAGGTTACTCAATACAAGGCCGGTAAGGCTTCCTTGTTCGCCCAAGGTAAGAGAAGATATGACCGTAAGCAATCCGGTTTTGGTGGTCAAACCAAGCCAGTTTTCCACAAGAAAGCCAAGACTACCAAGAAGGTCGTCTTGAGATTGGAGTGTGTTGTCTGCAAGACCAAGGCCCAACTTTCCTTGAAGAGATGTAAGCACTTCGAGTTGGGTGGTGACAAGAAGCAGAAGGGTCAAGCTTTGCAATTTTAA	151		151	GGTGGTCAAACCAAG	VALID	CCA	Proline
yHMPu5000035677_kodamaea_ohmeri_160519_g001388.m1	4236	ATGGTTAACGTCCCAAAAACTAGAAAGACCTACTGTAAGGGTAAGGAGTGCCGTAAGCACACCCAGCACAAGGTTACCCAATACAAGGCTGGTAAGGCTTCCTTGTTCGCTCAGGGTAAGAGAAGATATGACAGAAAGCAGTCCGGTTTCGGTGGTCAGACCAAGCCAGTTTTCCACAAGAAGGCTAAGACCACCAAGAAGGTCGTCTTGAGATTGGAGTGTGTTGTCTGCAAGACCAAGGCTCAGTTGTCTTTGAAGAGATGTAAGCACTTCGAGTTGGGTGGTGACAAGAAGCAAAAGGGCCAGGCTTTGCAGTTCTAA	ATGGTTAACGTCCCAAAAACTAGAAAGACCTACTGTAAGGGTAAGGAGTGCCGTAAGCACACCCAGCACAAGGTTACCCAATACAAGGCTGGTAAGGCTTCCTTGTTCGCTCAGGGTAAGAGAAGATATGACAGAAAGCAGTCCGGTTTCGGTGGTCAGACCAAGCCAGTTTTCCACAAGAAGGCTAAGACCACCAAGAAGGTCGTCTTGAGATTGGAGTGTGTTGTCTGCAAGACCAAGGCTCAGTTGTCTTTGAAGAGATGTAAGCACTTCGAGTTGGGTGGTGACAAGAAGCAAAAGGGCCAGGCTTTGCAGTTCTAA	#VALUE!	151	#VALUE!	#VALUE!	#VALUE!	#VALUE!	#VALUE!
yHMPu5000037229_kodamaea_neixiangensis_210210_g002674.m1	4236	ATGGTTAACGTCCCAAAAACTAGAAAGACCTACTGTAAGGGTAAGGAATGCCGTAAGCACACCCAGCACAAGGTTACCCAATACAAGGCTGGTAAGGCTTCTTTGTTTGCCCAAGGTAAGAGAAGATATGACAGAAAGCAGTCTGGTTTCGGTGGTCAAACCAAGCCAGTTTTCCACAAGAAGGCCAAGACCACTAAGAAGGTTGTCTTGAGATTGGAATGTGTTGTCTGCAAGACCAAGGCTCAGCTTTCGTTGAAGAGATGTAAGCACTTTGAGTTGGGTGGTGACAAGAAGCAAAAGGGTCAAGCCTTGCAATTTTAG	ATGGTTAACGTCCCAAAAACTAGAAAGACCTACTGTAAGGGTAAGGAATGCCGTAAGCACACCCAGCACAAGGTTACCCAATACAAGGCTGGTAAGGCTTCTTTGTTTGCCCAAGGTAAGAGAAGATATGACAGAAAGCAGTCTGGTTTCGGTGGTCAAACCAAGCCAGTTTTCCACAAGAAGGCCAAGACCACTAAGAAGGTTGTCTTGAGATTGGAATGTGTTGTCTGCAAGACCAAGGCTCAGCTTTCGTTGAAGAGATGTAAGCACTTTGAGTTGGGTGGTGACAAGAAGCAAAAGGGTCAAGCCTTGCAATTTTAG	151		151	GGTGGTCAAACCAAG	VALID	CCA	Proline
yHMPu5000037253_nematodospora_anomalae_210210_g000131.m1	4236	ATGGTTAACGTTCCAAAGACTAGAAAAACCTACTGTAAAGGTAAAGAATGTCGTAAGCACACTCAACATAAAGTTACCCAATACAAAGCTGGTAAAGCTTCCTTATTTGCTCAAGGTAAAAGAAGATATGACAGAAAACAATCAGGTTTCGGTGGTCAAACTAAGCCTGTCTTCCACAAAAAGGCTAAAACCACCAAGAAAGTTGTTTTAAGATTAGAATGTGTTGTTTGTAAAACCAAGGCTCAATTATCATTAAAGAGATGTAAACATTTCGAGTTAGGTGGTGATAAAAAACAAAAAGGTCAAGCTTTACAATTCTAA	ATGGTTAACGTTCCAAAGACTAGAAAAACCTACTGTAAAGGTAAAGAATGTCGTAAGCACACTCAACATAAAGTTACCCAATACAAAGCTGGTAAAGCTTCCTTATTTGCTCAAGGTAAAAGAAGATATGACAGAAAACAATCAGGTTTCGGTGGTCAAACTAAGCCTGTCTTCCACAAAAAGGCTAAAACCACCAAGAAAGTTGTTTTAAGATTAGAATGTGTTGTTTGTAAAACCAAGGCTCAATTATCATTAAAGAGATGTAAACATTTCGAGTTAGGTGGTGATAAAAAACAAAAAGGTCAAGCTTTACAATTCTAA	151		151	GGTGGTCAAACTAAG	VALID	CCT	Proline
yHMPu5000037926_candida_alai_190924_g000177.m1	4236	ATGGTGAACGTTCCAAAGACTAGAAAGACCTACTGTAAAGGTAAGGAGTGTCGTAAGCACACCCAACACAAGGTTACTCAATACAAGGCTGGTAAGGCTTCTTTGTTTGCTCAAGGTAAGAGAAGATATGACCGTAAGCAATCCGGTTTCGGTGGTCAAACCAAGCCAGTCTTCCACAAGAAGGCCAAGACCACCAAGAAGGTTGTTTTGAGATTGGAATGTGTCGTTTGTAAGACCAAGGCCCAATTGTCCTTGAAGAGATGTAAGCACTTTGAATTGGGTGGTGACAAGAAACAAAAGGGTCAAGCCTTACAATTTTAA	ATGGTGAACGTTCCAAAGACTAGAAAGACCTACTGTAAAGGTAAGGAGTGTCGTAAGCACACCCAACACAAGGTTACTCAATACAAGGCTGGTAAGGCTTCTTTGTTTGCTCAAGGTAAGAGAAGATATGACCGTAAGCAATCCGGTTTCGGTGGTCAAACCAAGCCAGTCTTCCACAAGAAGGCCAAGACCACCAAGAAGGTTGTTTTGAGATTGGAATGTGTCGTTTGTAAGACCAAGGCCCAATTGTCCTTGAAGAGATGTAAGCACTTTGAATTGGGTGGTGACAAGAAACAAAAGGGTCAAGCCTTACAATTTTAA	151		151	GGTGGTCAAACCAAG	VALID	CCA	Proline
yHMPu5000038063_candida_xylanilytica_180604.haplomerger2_g005646.m1	4236	ATGGTTAACGTCCCAAAAACTAGAAAGACCTACTGTAAGGGTAAGGAATGTCGTAAGCACACCCAACACAAAGTTACCCAATACAAGGCTGGTAAGGCTTCTTTATTCGCTCAAGGTAAGAGAAGATATGACCGTAAACAATCCGGTTTCGGTGGTCAAACCAAGCCAGTTTTCCACAAGAAAGCTAAGACTACCAAGAAGGTTGTTTTAAGATTGGAATGTGTTGTCTGTAAGACCAAGGCTCAATTATCCTTAAAGAGATGTAAGCACTTCGAATTAGGTGGTGACAAGAAGCAAAAGGGTCAAGCTTTACAATTTTAA	ATGGTTAACGTCCCAAAAACTAGAAAGACCTACTGTAAGGGTAAGGAATGTCGTAAGCACACCCAACACAAAGTTACCCAATACAAGGCTGGTAAGGCTTCTTTATTCGCTCAAGGTAAGAGAAGATATGACCGTAAACAATCCGGTTTCGGTGGTCAAACCAAGCCAGTTTTCCACAAGAAAGCTAAGACTACCAAGAAGGTTGTTTTAAGATTGGAATGTGTTGTCTGTAAGACCAAGGCTCAATTATCCTTAAAGAGATGTAAGCACTTCGAATTAGGTGGTGACAAGAAGCAAAAGGGTCAAGCTTTACAATTTTAA	151		151	GGTGGTCAAACCAAG	VALID	CCA	Proline
yHMPu5000038079_Candida_tanticharoeniae_SPADES_g003335.m1	4236	ATGGTTAACGTTCCCAAGACCAGAAAGACTTACTGCAAGGGCAAGGAGTGCCGCAAGCACACCCAGCACAAGGTGACCCAGTACAAGGCCGGTAAGGCTTCCCTTTTCGCCCAGGGTAAGAGAAGATACGACCGTAAGCAGAGTGGTTTCGGTGGTCAGACCAAGCCCGTCTTCCACAAGAAGGCCAAGACCACCAAGAAGGTTGTGTTGAGATTGGAGTGTGTTGTCTGCAAGACCAAGGCTCAGCTCTCCTTGAAGAGATGCAAGCACTTCGAGTTGGGTGGTGACAAGAAGCAGAAGGGCCAGGCTTTGCAGTTCTAA	ATGGTTAACGTTCCCAAGACCAGAAAGACTTACTGCAAGGGCAAGGAGTGCCGCAAGCACACCCAGCACAAGGTGACCCAGTACAAGGCCGGTAAGGCTTCCCTTTTCGCCCAGGGTAAGAGAAGATACGACCGTAAGCAGAGTGGTTTCGGTGGTCAGACCAAGCCCGTCTTCCACAAGAAGGCCAAGACCACCAAGAAGGTTGTGTTGAGATTGGAGTGTGTTGTCTGCAAGACCAAGGCTCAGCTCTCCTTGAAGAGATGCAAGCACTTCGAGTTGGGTGGTGACAAGAAGCAGAAGGGCCAGGCTTTGCAGTTCTAA	#VALUE!	151	#VALUE!	#VALUE!	#VALUE!	#VALUE!	#VALUE!
yHMPu5000038083_candida_subhashii_180604.haplomerger2_g002904.m1	4236	ATGGTTAACGTCCCAAAAACTAGAAAGACCTACTGTAAGGGTAAGGAATGTCGTAAACACACCCAACACAAAGTTACCCAATACAAGGCTGGTAAGGCTTCTTTATTCGCTCAAGGTAAGAGAAGATATGACCGTAAACAATCTGGTTTCGGTGGTCAAACTAAGCCAGTTTTCCACAAGAAAGCTAAGACTACCAAGAAGGTCGTTTTAAGATTAGAATGTGTTGTCTGTAAGACCAAGGCTCAATTATCCTTAAAGAGATGTAAGCATTTCGAATTAGGTGGTGACAAGAAACAAAAGGGTCAAGCTTTACAATTTTAA	ATGGTTAACGTCCCAAAAACTAGAAAGACCTACTGTAAGGGTAAGGAATGTCGTAAACACACCCAACACAAAGTTACCCAATACAAGGCTGGTAAGGCTTCTTTATTCGCTCAAGGTAAGAGAAGATATGACCGTAAACAATCTGGTTTCGGTGGTCAAACTAAGCCAGTTTTCCACAAGAAAGCTAAGACTACCAAGAAGGTCGTTTTAAGATTAGAATGTGTTGTCTGTAAGACCAAGGCTCAATTATCCTTAAAGAGATGTAAGCATTTCGAATTAGGTGGTGACAAGAAACAAAAGGGTCAAGCTTTACAATTTTAA	151		151	GGTGGTCAAACTAAG	VALID	CCA	Proline
yHMPu5000038109_candida_kaohsiungensis_170912_g003781.m1	4236	ATGGTTAACGTCCCAAAAACTAGAAAGACCTACTGTAAGGGTAAGGAATGCCGTAAGCACACCCAGCACAAGGTTACCCAATACAAGGCTGGTAAGGCTTCTTTGTTTGCCCAAGGTAAGAGAAGATATGACAGAAAGCAATCTGGTTTCGGAGGTCAAACCAAGCCAGTTTTCCACAAGAAGGCTAAGACCACCAAGAAGGTTGTCTTGAGATTGGAATGTGTTGTCTGCAAGACCAAGGCTCAACTCTCATTGAAGAGATGTAAGCACTTTGAGTTGGGTGGTGACAAGAAGCAAAAGGGTCAAGCCTTACAATTTTAG	ATGGTTAACGTCCCAAAAACTAGAAAGACCTACTGTAAGGGTAAGGAATGCCGTAAGCACACCCAGCACAAGGTTACCCAATACAAGGCTGGTAAGGCTTCTTTGTTTGCCCAAGGTAAGAGAAGATATGACAGAAAGCAATCTGGTTTCGGAGGTCAAACCAAGCCAGTTTTCCACAAGAAGGCTAAGACCACCAAGAAGGTTGTCTTGAGATTGGAATGTGTTGTCTGCAAGACCAAGGCTCAACTCTCATTGAAGAGATGTAAGCACTTTGAGTTGGGTGGTGACAAGAAGCAAAAGGGTCAAGCCTTACAATTTTAG	151		151	GGAGGTCAAACCAAG	VALID	CCA	Proline
yHMPu5000038380_candida_loeiensis_170713_g003581.m1	4236	ATGGTTAACGTCCCAAAAACTAGAAAGACCTACTGTAAGGGTAAGGAGTGCCGCAAGCACACCCAGCACAAGGTGACCCAATACAAGGCTGGTAAGGCTTCTTTGTTCGCTCAGGGTAAGAGAAGATATGACAGAAAGCAGTCCGGTTTCGGTGGTCAGACCAAGCCAGTTTTCCACAAGAAGGCTAAGACTACCAAGAAGGTCGTCTTGAGATTGGAGTGTGTTGTCTGCAAGACCAAGGCTCAGTTGTCCTTGAAGAGATGTAAGCACTTCGAATTGGGTGGTGACAAGAAGCAAAAGGGTCAAGCTTTGCAGTTCTAA	ATGGTTAACGTCCCAAAAACTAGAAAGACCTACTGTAAGGGTAAGGAGTGCCGCAAGCACACCCAGCACAAGGTGACCCAATACAAGGCTGGTAAGGCTTCTTTGTTCGCTCAGGGTAAGAGAAGATATGACAGAAAGCAGTCCGGTTTCGGTGGTCAGACCAAGCCAGTTTTCCACAAGAAGGCTAAGACTACCAAGAAGGTCGTCTTGAGATTGGAGTGTGTTGTCTGCAAGACCAAGGCTCAGTTGTCCTTGAAGAGATGTAAGCACTTCGAATTGGGTGGTGACAAGAAGCAAAAGGGTCAAGCTTTGCAGTTCTAA	#VALUE!	151	#VALUE!	#VALUE!	#VALUE!	#VALUE!	#VALUE!
yHMPu5000040930_candida_hsintzibuensis_201018_g002596.m1	4236	ATGGTTAACGTCCCAAAAACTAGAAAGACCTACTGTAAGGGTAAGGAATGCCGTAAGCACACCCAGCACAAGGTTACCCAATACAAGGCTGGTAAGGCTTCTTTGTTTGCCCAAGGTAAGAGAAGATATGACAGAAAGCAATCTGGTTTCGGTGGTCAAACCAAGCCAGTTTTCCACAAGAAGGCTAAGACTACCAAGAAGGTTGTCTTGAGATTGGAATGTGTTGTCTGCAAGACCAAGGCTCAACTCTCGTTGAAGAGATGTAAGCACTTTGAGTTGGGTGGTGACAAGAAGCAAAAGGGTCAAGCCTTACAATTTTAG	ATGGTTAACGTCCCAAAAACTAGAAAGACCTACTGTAAGGGTAAGGAATGCCGTAAGCACACCCAGCACAAGGTTACCCAATACAAGGCTGGTAAGGCTTCTTTGTTTGCCCAAGGTAAGAGAAGATATGACAGAAAGCAATCTGGTTTCGGTGGTCAAACCAAGCCAGTTTTCCACAAGAAGGCTAAGACTACCAAGAAGGTTGTCTTGAGATTGGAATGTGTTGTCTGCAAGACCAAGGCTCAACTCTCGTTGAAGAGATGTAAGCACTTTGAGTTGGGTGGTGACAAGAAGCAAAAGGGTCAAGCCTTACAATTTTAG	151		151	GGTGGTCAAACCAAG	VALID	CCA	Proline
yHMPu5000041701_Candida_jeffriesii_SPADES.haplomerger2_g009472.m1	4236	ATGGTTAACGTTCCAAAGACTAGAAAGACCTACTGTAAGGGTAAGGAATGTCGTAAGCACACTCAACACAAGGTTACCCAATACAAGGCCGGTAAAGCCTCATTATTCGCTCAAGGTAAGAGAAGATATGACCGTAAACAATCTGGTTTCGGGGGTCAAACCAAGCCAGTTTTCCACAAGAAGGCCAAGACCACCAAGAAGGTTGTCTTGAGATTGGAATGTGTTGTCTGTAAGACCAAGGCTCAATTATCCTTAAAGAGATGTAAACATTTTGAATTGGGTGGTGATAAAAAACAAAAGGGTCAAGCCTTACAATTCTAA	ATGGTTAACGTTCCAAAGACTAGAAAGACCTACTGTAAGGGTAAGGAATGTCGTAAGCACACTCAACACAAGGTTACCCAATACAAGGCCGGTAAAGCCTCATTATTCGCTCAAGGTAAGAGAAGATATGACCGTAAACAATCTGGTTTCGGGGGTCAAACCAAGCCAGTTTTCCACAAGAAGGCCAAGACCACCAAGAAGGTTGTCTTGAGATTGGAATGTGTTGTCTGTAAGACCAAGGCTCAATTATCCTTAAAGAGATGTAAACATTTTGAATTGGGTGGTGATAAAAAACAAAAGGGTCAAGCCTTACAATTCTAA	151		151	GGGGGTCAAACCAAG	VALID	CCA	Proline
yHMPu5000037845_scheffersomyces_virginianus_170912_g001224.m1	4236	ATGGTTAACGTTCCAAAGACTAGAAAGACCTACTGTAAGGGTAAGGAGTGTCGTAAGCACACTCAACACAAGGTCACCCAATACAAGGCTGGTAAGGCTTCCTTATTCGCTCAAGGTAAGAGAAGATATGACCGTAAGCAATCTGGTTTCGGTGGTCAAACCAAGCCAGTTTTCCACAAGAAGGCTAAGACTACCAAGAAGGTCGTCTTGAGATTGGAATGTATTGTCTGCAAGACCAAGGCTCAATTATCCTTAAAGAGATGTAAGCACTTCGAATTAGGTGGTGACAAGAAGCAAAAGGGTCAAGCTTTACAGTTTTAA	ATGGTTAACGTTCCAAAGACTAGAAAGACCTACTGTAAGGGTAAGGAGTGTCGTAAGCACACTCAACACAAGGTCACCCAATACAAGGCTGGTAAGGCTTCCTTATTCGCTCAAGGTAAGAGAAGATATGACCGTAAGCAATCTGGTTTCGGTGGTCAAACCAAGCCAGTTTTCCACAAGAAGGCTAAGACTACCAAGAAGGTCGTCTTGAGATTGGAATGTATTGTCTGCAAGACCAAGGCTCAATTATCCTTAAAGAGATGTAAGCACTTCGAATTAGGTGGTGACAAGAAGCAAAAGGGTCAAGCTTTACAGTTTTAA	151		151	GGTGGTCAAACCAAG	VALID	CCA	Proline
yHMPu5000037852_scheffersomyces_cryptocercus_180604_g001923.m1	4236	ATGGTTAACGTTCCAAAGACTAGAAAGACCTACTGTAAGGGTAAAGAGTGTCGTAAGCACACTCAACACAAGGTCACCCAATACAAGGCTGGTAAGGCTTCCTTATTCGCTCAAGGTAAGAGAAGATATGACCGTAAGCAATCTGGTTTCGGTGGTCAAACCAAGCCAGTTTTCCACAAGAAGGCTAAGACTACCAAGAAGGTCGTCTTGAGATTGGAATGTATTGTCTGCAAGACCAAGGCTCAATTATCCTTAAAGAGATGTAAGCACTTCGAATTAGGTGGTGACAAGAAGCAAAAGGGTCAAGCTTTACAGTTTTAA	ATGGTTAACGTTCCAAAGACTAGAAAGACCTACTGTAAGGGTAAAGAGTGTCGTAAGCACACTCAACACAAGGTCACCCAATACAAGGCTGGTAAGGCTTCCTTATTCGCTCAAGGTAAGAGAAGATATGACCGTAAGCAATCTGGTTTCGGTGGTCAAACCAAGCCAGTTTTCCACAAGAAGGCTAAGACTACCAAGAAGGTCGTCTTGAGATTGGAATGTATTGTCTGCAAGACCAAGGCTCAATTATCCTTAAAGAGATGTAAGCACTTCGAATTAGGTGGTGACAAGAAGCAAAAGGGTCAAGCTTTACAGTTTTAA	151		151	GGTGGTCAAACCAAG	VALID	CCA	Proline
yHMPu5000037854_scheffersomyces_insectosa_170912_g004986.m1	4236	ATGGTTAACGTTCCAAAGACTAGAAAGACCTACTGTAAGGGTAAGGAATGTCGTAAGCACACTCAACACAAGGTCACCCAATACAAGGCTGGTAAGGCTTCCTTATTCGCTCAAGGTAAGAGAAGATATGACCGTAAGCAATCTGGTTTCGGTGGTCAAACCAAGCCAGTTTTCCACAAGAAGGCTAAGACTACCAAGAAGGTCGTCTTGAGATTGGAATGTATTGTCTGCAAGACCAAGGCTCAATTATCCTTAAAGAGATGTAAGCACTTCGAATTAGGTGGTGACAAGAAGCAAAAGGGTCAAGCTTTACAATTTTAA	ATGGTTAACGTTCCAAAGACTAGAAAGACCTACTGTAAGGGTAAGGAATGTCGTAAGCACACTCAACACAAGGTCACCCAATACAAGGCTGGTAAGGCTTCCTTATTCGCTCAAGGTAAGAGAAGATATGACCGTAAGCAATCTGGTTTCGGTGGTCAAACCAAGCCAGTTTTCCACAAGAAGGCTAAGACTACCAAGAAGGTCGTCTTGAGATTGGAATGTATTGTCTGCAAGACCAAGGCTCAATTATCCTTAAAGAGATGTAAGCACTTCGAATTAGGTGGTGACAAGAAGCAAAAGGGTCAAGCTTTACAATTTTAA	151		151	GGTGGTCAAACCAAG	VALID	CCA	Proline
yHMPu5000037856_scheffersomyces_quercinus_180604_g001817.m1	4236	ATGGTTAACGTTCCAAAGACTAGAAAGACCTACTGTAAGGGTAAGGAGTGTCGTAAGCACACTCAACACAAGGTCACCCAATACAAGGCTGGTAAGGCTTCCTTATTCGCTCAAGGTAAGAGAAGATATGACCGTAAGCAATCTGGTTTCGGTGGTCAAACCAAGCCAGTTTTCCACAAGAAGGCTAAGACTACCAAGAAGGTCGTCTTGAGATTGGAATGTATTGTCTGCAAGACCAAGGCTCAATTATCCTTAAAGAGATGTAAGCACTTCGAATTAGGTGGTGACAAGAAGCAAAAGGGTCAAGCTTTACAGTTTTAA	ATGGTTAACGTTCCAAAGACTAGAAAGACCTACTGTAAGGGTAAGGAGTGTCGTAAGCACACTCAACACAAGGTCACCCAATACAAGGCTGGTAAGGCTTCCTTATTCGCTCAAGGTAAGAGAAGATATGACCGTAAGCAATCTGGTTTCGGTGGTCAAACCAAGCCAGTTTTCCACAAGAAGGCTAAGACTACCAAGAAGGTCGTCTTGAGATTGGAATGTATTGTCTGCAAGACCAAGGCTCAATTATCCTTAAAGAGATGTAAGCACTTCGAATTAGGTGGTGACAAGAAGCAAAAGGGTCAAGCTTTACAGTTTTAA	151		151	GGTGGTCAAACCAAG	VALID	CCA	Proline
yHMPu5000038039_scheffersomyces_parashehatae_170912_g000233.m1	4236	ATGGTTAACGTTCCAAAGACTAGAAAGACCTACTGTAAGGGTAAGGAGTGTCGTAAGCACACTCAACACAAGGTCACCCAATACAAGGCTGGTAAGGCTTCCTTATTCGCTCAAGGTAAGAGAAGATATGACCGTAAGCAATCTGGTTTCGGAGGTCAAACCAAGCCAGTTTTCCACAAGAAGGCTAAGACTACCAAGAAGGTCGTTTTGAGATTGGAATGTATTGTCTGCAAGACCAAGGCTCAATTATCCTTAAAGAGATGTAAGCACTTCGAATTAGGTGGTGACAAGAAGCAAAAGGGTCAAGCTTTACAGTTTTAA	ATGGTTAACGTTCCAAAGACTAGAAAGACCTACTGTAAGGGTAAGGAGTGTCGTAAGCACACTCAACACAAGGTCACCCAATACAAGGCTGGTAAGGCTTCCTTATTCGCTCAAGGTAAGAGAAGATATGACCGTAAGCAATCTGGTTTCGGAGGTCAAACCAAGCCAGTTTTCCACAAGAAGGCTAAGACTACCAAGAAGGTCGTTTTGAGATTGGAATGTATTGTCTGCAAGACCAAGGCTCAATTATCCTTAAAGAGATGTAAGCACTTCGAATTAGGTGGTGACAAGAAGCAAAAGGGTCAAGCTTTACAGTTTTAA	151		151	GGAGGTCAAACCAAG	VALID	CCA	Proline
yHMPu5000038040_scheffersomyces_xylosifermentans_170912_g005415.m1	4236	ATGGTTAACGTTCCAAAGACTAGAAAGACCTACTGTAAGGGTAAGGAATGTCGTAAGCACACTCAACACAAGGTTACCCAATACAAGGCTGGTAAGGCTTCCTTATTCGCTCAAGGTAAGAGAAGATATGACCGTAAGCAATCTGGTTTCGGTGGTCAAACCAAGCCAGTTTTCCACAAGAAGGCTAAAACTACCAAGAAGGTCGTCTTGAGATTGGAATGTATTGTCTGTAAGACCAAGGCTCAATTATCCTTGAAGAGATGTAAGCACTTCGAATTAGGTGGTGACAAGAAGCAAAAGGGTCAAGCTTTACAATTTTAA	ATGGTTAACGTTCCAAAGACTAGAAAGACCTACTGTAAGGGTAAGGAATGTCGTAAGCACACTCAACACAAGGTTACCCAATACAAGGCTGGTAAGGCTTCCTTATTCGCTCAAGGTAAGAGAAGATATGACCGTAAGCAATCTGGTTTCGGTGGTCAAACCAAGCCAGTTTTCCACAAGAAGGCTAAAACTACCAAGAAGGTCGTCTTGAGATTGGAATGTATTGTCTGTAAGACCAAGGCTCAATTATCCTTGAAGAGATGTAAGCACTTCGAATTAGGTGGTGACAAGAAGCAAAAGGGTCAAGCTTTACAATTTTAA	151		151	GGTGGTCAAACCAAG	VALID	CCA	Proline
yHMPu5000038106_candida_lignosa_170912_g000485.m1	4236	ATGGTTAACGTTCCAAAGACTAGAAAGACCTACTGTAAGGGTAAGGAATGTCGTAAGCACACTCAACACAAGGTCACCCAATACAAGGCTGGTAAGGCTTCCTTATTCGCTCAAGGTAAGAGAAGATATGACCGTAAGCAGTCTGGTTTCGGTGGTCAAACCAAGCCAGTTTTCCACAAGAAGGCTAAGACTACCAAGAAGGTCGTCTTGAGATTGGAATGTATTGTCTGCAAGACCAAGGCTCAATTATCCTTGAAGAGATGTAAGCACTTCGAATTAGGTGGTGACAAGAAGCAAAAGGGTCAAGCTTTACAGTTTTAA	ATGGTTAACGTTCCAAAGACTAGAAAGACCTACTGTAAGGGTAAGGAATGTCGTAAGCACACTCAACACAAGGTCACCCAATACAAGGCTGGTAAGGCTTCCTTATTCGCTCAAGGTAAGAGAAGATATGACCGTAAGCAGTCTGGTTTCGGTGGTCAAACCAAGCCAGTTTTCCACAAGAAGGCTAAGACTACCAAGAAGGTCGTCTTGAGATTGGAATGTATTGTCTGCAAGACCAAGGCTCAATTATCCTTGAAGAGATGTAAGCACTTCGAATTAGGTGGTGACAAGAAGCAAAAGGGTCAAGCTTTACAGTTTTAA	151		151	GGTGGTCAAACCAAG	VALID	CCA	Proline
yHMPu5000041791_scheffersomyces_shehatae_180604_g004404.m1	4236	ATGGTTAACGTTCCAAAGACTAGAAAGACCTACTGTAAGGGTAAGGAGTGTCGTAAGCACACTCAACACAAGGTCACCCAATACAAGGCTGGTAAGGCTTCCTTATTCGCTCAAGGTAAGAGAAGATATGACCGTAAGCAATCTGGTTTCGGTGGTCAAACCAAGCCAGTTTTCCACAAGAAGGCTAAGACTACCAAGAAGGTCGTCTTGAGATTGGAATGTATTGTCTGCAAGACCAAGGCTCAATTATCCTTAAAGAGATGTAAGCACTTCGAATTAGGTGGTGACAAGAAGCAAAAGGGTCAAGCTTTACAGTTTTAA	ATGGTTAACGTTCCAAAGACTAGAAAGACCTACTGTAAGGGTAAGGAGTGTCGTAAGCACACTCAACACAAGGTCACCCAATACAAGGCTGGTAAGGCTTCCTTATTCGCTCAAGGTAAGAGAAGATATGACCGTAAGCAATCTGGTTTCGGTGGTCAAACCAAGCCAGTTTTCCACAAGAAGGCTAAGACTACCAAGAAGGTCGTCTTGAGATTGGAATGTATTGTCTGCAAGACCAAGGCTCAATTATCCTTAAAGAGATGTAAGCACTTCGAATTAGGTGGTGACAAGAAGCAAAAGGGTCAAGCTTTACAGTTTTAA	151		151	GGTGGTCAAACCAAG	VALID	CCA	Proline
yHMPu5000040918_candida_insectamans_201018_g005411.m1	4236	CTTTTAGTTAACGTCCCAAAAACTAGAAAGACCTACTGTAAGGGTAAAGAATGTCGTAAACACACCCAACATAAAGTTACCCAATATAAGGCTGGTAAGGCTTCTTTATTCGCTCAAGGTAAGAGAAGATATGACCGTAAACAATCCGGGTTCGGTGGTCAAACCAAGCCAGTTTTCCACAAGAAAGCTAAGACTACCAAGAAGGTTGTTTTAAGATTAGAATGTGTTGTTTGTAAGACCAAGGCTCAATTATCCTTAAAGAGATGTAAGCACTTTGAATTAGGTGGTGACAAGAAACAAAAGGGTCAAGCTTTACAATTTTAA	CTTTTAGTTAACGTCCCAAAAACTAGAAAGACCTACTGTAAGGGTAAAGAATGTCGTAAACACACCCAACATAAAGTTACCCAATATAAGGCTGGTAAGGCTTCTTTATTCGCTCAAGGTAAGAGAAGATATGACCGTAAACAATCCGGGTTCGGTGGTCAAACCAAGCCAGTTTTCCACAAGAAAGCTAAGACTACCAAGAAGGTTGTTTTAAGATTAGAATGTGTTGTTTGTAAGACCAAGGCTCAATTATCCTTAAAGAGATGTAAGCACTTTGAATTAGGTGGTGACAAGAAACAAAAGGGTCAAGCTTTACAATTTTAA	154		154	GGTGGTCAAACCAAG	VALID	CCA	Proline
spathaspora_xylofermentans_g004214.m1	4236	ATGTATACTAACCAAAATCATTTAGTTAACGTCCCAAAAACTAGAAAGACCTACTGTAAGGGTAAGGAATGTCGTAAACACACCCAACACAAAGTTACCCAATACAAGGCTGGTAAGGCTTCTTTATTCGCTCAAGGTAAGAGAAGATATGACCGTAAGCAATCCGGTTTCGGTGGTCAAACCAAGCCAGTTTTCCACAAGAAGGCTAAGACTACCAAGAAGGTTGTTTTAAGATTAGAATGTGTTGTCTGTAAGACCAAGGCTCAATTATCCTTAAAGAGATGTAAGCACTTCGAATTAGGTGGTGACAAGAAGCAAAAGGGTCAAGCTTTACAATTTTAA	ATGTATACTAACCAAAATCATTTAGTTAACGTCCCAAAAACTAGAAAGACCTACTGTAAGGGTAAGGAATGTCGTAAACACACCCAACACAAAGTTACCCAATACAAGGCTGGTAAGGCTTCTTTATTCGCTCAAGGTAAGAGAAGATATGACCGTAAGCAATCCGGTTTCGGTGGTCAAACCAAGCCAGTTTTCCACAAGAAGGCTAAGACTACCAAGAAGGTTGTTTTAAGATTAGAATGTGTTGTCTGTAAGACCAAGGCTCAATTATCCTTAAAGAGATGTAAGCACTTCGAATTAGGTGGTGACAAGAAGCAAAAGGGTCAAGCTTTACAATTTTAA	172		172	GGTGGTCAAACCAAG	VALID	CCA	Proline
spathaspora_girioi_g002706.m1	4236	ATGGTTAACGTTCCAAAGACTAGAAAGACCTACTGTAAGGGTAGAGAATGTCGTAAGCACACTCAACACAAGGTTACCCAATACAAAGCCGGTAAAGCTTCTTTATTCGCTCAAGGTAAGAGAAGATATGACCGTAAACAATCCGGTTTCGGGGGTCAAACTAAGCCAGTTTTCCACAAGAAGGCTAAGACTACCAAGAAGGTTGTCTTGAGATTAGAATGTGTTGTCTGTAAGACTAAGGCTCAATTATCTTTGAAGAGATGTAAGCACTTTGAATTGGGTGGTGATAAGAAACAAAAGGGTCAAGCCTTACAATTCTAG	ATGGTTAACGTTCCAAAGACTAGAAAGACCTACTGTAAGGGTAGAGAATGTCGTAAGCACACTCAACACAAGGTTACCCAATACAAAGCCGGTAAAGCTTCTTTATTCGCTCAAGGTAAGAGAAGATATGACCGTAAACAATCCGGTTTCGGGGGTCAAACTAAGCCAGTTTTCCACAAGAAGGCTAAGACTACCAAGAAGGTTGTCTTGAGATTAGAATGTGTTGTCTGTAAGACTAAGGCTCAATTATCTTTGAAGAGATGTAAGCACTTTGAATTGGGTGGTGATAAGAAACAAAAGGGTCAAGCCTTACAATTCTAG	151		151	GGGGGTCAAACTAAG	VALID	CCA	Proline
yHMPu5000041850_candida_lyxosophila_170307.haplomerger2_g004885.m1	4236	ATGGTTAACGTCCCAAAAACTAGAAAGACCTACTGTAAGGGTAGGGAATGTCGTAAGCACACCCAACACAAGGTTACCCAATACAAGGCTGGTAAGGCTTCTTTGTTCGCTCAAGGTAAGAGAAGATATGACCGTAAACAATCCGGTTTCGGTGGTCAAACTAAGCCAGTTTTCCACAAGAAAGCTAAGACTACCAAGAAGGTTGTTTTAAGATTGGAATGTGTTGTCTGTAAGACCAAGGCTCAATTATCTTTAAAGAGATGTAAGCATTTCGAATTAGGTGGTGACAAGAAACAAAAGGGTCAAGCTTTACAATTTTAG	ATGGTTAACGTCCCAAAAACTAGAAAGACCTACTGTAAGGGTAGGGAATGTCGTAAGCACACCCAACACAAGGTTACCCAATACAAGGCTGGTAAGGCTTCTTTGTTCGCTCAAGGTAAGAGAAGATATGACCGTAAACAATCCGGTTTCGGTGGTCAAACTAAGCCAGTTTTCCACAAGAAAGCTAAGACTACCAAGAAGGTTGTTTTAAGATTGGAATGTGTTGTCTGTAAGACCAAGGCTCAATTATCTTTAAAGAGATGTAAGCATTTCGAATTAGGTGGTGACAAGAAACAAAAGGGTCAAGCTTTACAATTTTAG	151		151	GGTGGTCAAACTAAG	VALID	CCA	Proline
yHMPu5000035302_candida_fragi_180604_g000117.m1	4236	ATGGTTAACGTTCCAAAGACCAGAAAGACTTACTGTAAGGGTAGAGAATGCAGAAAGCACACTCAACACAAGGTTACTCAGTACAAGGCTGGTAAGGCTTCTCTTTTCGCCCAAGGTAAGAGAAGATATGACCGTAAGCAATCCGGTTTCGGTGGTCAAACCAAGCCAGTTTTCCACAAGAAAGCTAAGACTACCAAGAAGGTTGTTTTAAGATTGGAATGTATTGTCTGTAAGACCAAGGCTCAACTCTCCTTAAAGAGATGTAAGCATTTCGAATTAGGTGGTGACAAGAAGCAAAAGGGTCAAGCCTTACAATTTTAA	ATGGTTAACGTTCCAAAGACCAGAAAGACTTACTGTAAGGGTAGAGAATGCAGAAAGCACACTCAACACAAGGTTACTCAGTACAAGGCTGGTAAGGCTTCTCTTTTCGCCCAAGGTAAGAGAAGATATGACCGTAAGCAATCCGGTTTCGGTGGTCAAACCAAGCCAGTTTTCCACAAGAAAGCTAAGACTACCAAGAAGGTTGTTTTAAGATTGGAATGTATTGTCTGTAAGACCAAGGCTCAACTCTCCTTAAAGAGATGTAAGCATTTCGAATTAGGTGGTGACAAGAAGCAAAAGGGTCAAGCCTTACAATTTTAA	151		151	GGTGGTCAAACCAAG	VALID	CCA	Proline
yHMPu5000034632_candida_athensensis_180604_g000688.m1	4236	ATGGTGAACGTTCCAAAGACCAGAAGAACCTATTGCAAGGGTAAAGAATGCCGTAAGCACACCCAACACAAGGTGACCCAATACAAGGCTGGTAAGGCTTCGTTGTTCGCTCAGGGTAAGAGAAGATACGACCGTAAGCAATCCGGTTTTGGTGGTCAAACTAAGCCCGTTTTCCACAAGAAGGCCAAGACCACCAAGAAGGTTGTCTTGAGATTGGAATGTGTTGTTTGCAAGACCAAGGCTCAACTTTCCTTGAAGAGATGTAAGCACTTTGAATTGGGAGGTGACAAGAAGCAAAAGGGTCAAGCTTTACAATTTTAA	ATGGTGAACGTTCCAAAGACCAGAAGAACCTATTGCAAGGGTAAAGAATGCCGTAAGCACACCCAACACAAGGTGACCCAATACAAGGCTGGTAAGGCTTCGTTGTTCGCTCAGGGTAAGAGAAGATACGACCGTAAGCAATCCGGTTTTGGTGGTCAAACTAAGCCCGTTTTCCACAAGAAGGCCAAGACCACCAAGAAGGTTGTCTTGAGATTGGAATGTGTTGTTTGCAAGACCAAGGCTCAACTTTCCTTGAAGAGATGTAAGCACTTTGAATTGGGAGGTGACAAGAAGCAAAAGGGTCAAGCTTTACAATTTTAA	151		151	GGTGGTCAAACTAAG	VALID	CCC	Proline
yHMPu5000035268_wickerhamomyces_hampshirensis_160928_g005919.m1	4236	ATGGTTAACGTTCCAAAAACCAGAAGAACTTACTGTAAAGGTAAAGAGTGCAGAAAACATACTCAACACAAAGTCACTCAATACAAAGCTGGTAAAGCTTCTTTATTTGCTCAAGGTAAACGTCGTTATGACCGTAAACAATCCGGTTTCGGTGGTCAAACCAAACCAGTTTTCCACAAAAAGGCTAAAACTACCAAAAAGGTTGTCTTGCGTTTGGAATGTGTTGTTTGTAAGACCAAAGCTCAATTATCTTTGAAACGTTGTAAACATTTCGAATTAGGTGGTGACAAAAAACAAAAAGGTCAAGCTTTACAATTTTAA	ATGGTTAACGTTCCAAAAACCAGAAGAACTTACTGTAAAGGTAAAGAGTGCAGAAAACATACTCAACACAAAGTCACTCAATACAAAGCTGGTAAAGCTTCTTTATTTGCTCAAGGTAAACGTCGTTATGACCGTAAACAATCCGGTTTCGGTGGTCAAACCAAACCAGTTTTCCACAAAAAGGCTAAAACTACCAAAAAGGTTGTCTTGCGTTTGGAATGTGTTGTTTGTAAGACCAAAGCTCAATTATCTTTGAAACGTTGTAAACATTTCGAATTAGGTGGTGACAAAAAACAAAAAGGTCAAGCTTTACAATTTTAA	151		151	GGTGGTCAAACCAAA	VALID	CCA	Proline
yHMPu5000035003_candida_bohiensis_160519_g006134.m1	4236	ATGGTTAACGTTCCAAAAACTAGAAAAACCTACTGTAAAGGTAGAGAATGTCGTAAACATACTCAACACAAAGTTACCCAATATAAAGCTGGTAAAGCTTCATTATTTGCTCAAGGTAAAAGAAGATATGACAGAAAACAATCAGGTTTCGGTGGTCAAACTAAACCAGTTTTCCACAAAAAAGCTAAAACTACCAAAAAAGTTGTTTTAAGATTAGAATGTGTTGTTTGTAAAACTAAAGCTCAATTAGCTTTAAAAAGATGTAAACATTTCGAATTAGGTGGTGATAAAAAACAAAAAGGTCAAGCTTTACAATTTTAA	ATGGTTAACGTTCCAAAAACTAGAAAAACCTACTGTAAAGGTAGAGAATGTCGTAAACATACTCAACACAAAGTTACCCAATATAAAGCTGGTAAAGCTTCATTATTTGCTCAAGGTAAAAGAAGATATGACAGAAAACAATCAGGTTTCGGTGGTCAAACTAAACCAGTTTTCCACAAAAAAGCTAAAACTACCAAAAAAGTTGTTTTAAGATTAGAATGTGTTGTTTGTAAAACTAAAGCTCAATTAGCTTTAAAAAGATGTAAACATTTCGAATTAGGTGGTGATAAAAAACAAAAAGGTCAAGCTTTACAATTTTAA	151		151	GGTGGTCAAACTAAA	VALID	CCA	Proline
yHMPu5000035713_candida_chauliodes_160613_g002670.m1	4236	ATGGTTAACGTTCCAAAAACAAGAAAAACCTACTGTAAAGGTAAAGAATGTAGAAAACATACTCAACACAAAGTTACCCAATACAAAGCTGGTAAAGCTTCATTATTTGCTCAAGGTAAAAGAAGATATGACAGAAAACAATCCGGTTTTGGTGGTCAAACCAAACCAGTTTTCCACAAAAAAGCTAAAACTACCAAAAAAGTTGTTTTAAGATTGGAATGTGTCGTCTGTAAAACCAAAGCTCAATTAGCTTTGAAAAGATGTAAACATTTCGAATTGGGTGGTGATAAAAAACAAAAAGGTCAAGCTTTACAATTTTAA	ATGGTTAACGTTCCAAAAACAAGAAAAACCTACTGTAAAGGTAAAGAATGTAGAAAACATACTCAACACAAAGTTACCCAATACAAAGCTGGTAAAGCTTCATTATTTGCTCAAGGTAAAAGAAGATATGACAGAAAACAATCCGGTTTTGGTGGTCAAACCAAACCAGTTTTCCACAAAAAAGCTAAAACTACCAAAAAAGTTGTTTTAAGATTGGAATGTGTCGTCTGTAAAACCAAAGCTCAATTAGCTTTGAAAAGATGTAAACATTTCGAATTGGGTGGTGATAAAAAACAAAAAGGTCAAGCTTTACAATTTTAA	151		151	GGTGGTCAAACCAAA	VALID	CCA	Proline
yHMPu5000037238_candida_coleopterorum_210210_g004021.m1	4236	ATGGTTAACGTTCCAAAAACTAGAAAAACCTACTGTAAAGGTAAAGAATGTAGAAAACACACTCAACATAAAGTTACTCAATATAAAGCTGGTAAAGCTTCTTTATTCGCTCAAGGTAAAAGAAGATATGACAGAAAACAATCAGGTTTCGGTGGTCAAACTAAACCAGTTTTCCACAAAAAAGCTAAAACTACCAAAAAAGTTGTTTTAAGATTAGAATGTGTTGTCTGTAAAACTAAAGCTCAATTAGCTTTAAAAAGATGTAAACATTTTGAATTAGGTGGTGATAAAAAACAAAAAGGTCAAGCTTTACAATTTTAA	ATGGTTAACGTTCCAAAAACTAGAAAAACCTACTGTAAAGGTAAAGAATGTAGAAAACACACTCAACATAAAGTTACTCAATATAAAGCTGGTAAAGCTTCTTTATTCGCTCAAGGTAAAAGAAGATATGACAGAAAACAATCAGGTTTCGGTGGTCAAACTAAACCAGTTTTCCACAAAAAAGCTAAAACTACCAAAAAAGTTGTTTTAAGATTAGAATGTGTTGTCTGTAAAACTAAAGCTCAATTAGCTTTAAAAAGATGTAAACATTTTGAATTAGGTGGTGATAAAAAACAAAAAGGTCAAGCTTTACAATTTTAA	151		151	GGTGGTCAAACTAAA	VALID	CCA	Proline
yHMPu5000037251_candida_xiaguanesis_210210_g001206.m1	4236	ATGGTTAACGTTCCAAAAACTAGAAAAACCTACTGTAAAGGTAAAGAATGTAGAAAACATACTCAACATAAAGTTACCCAATACAAAGCTGGTAAAGCTTCATTATTTGCTCAAGGTAAAAGAAGATATGACAGAAAACAATCTGGTTTCGGTGGTCAAACCAAACCAGTTTTCCACAAGAAAGCTAAAACCACAAAAAAAGTTGTTTTAAGATTGGAATGTGTTGTTTGTAAAACCAAAGCTCAATTAGCATTGAAAAGATGTAAACATTTCGAATTGGGTGGTGATAAAAAACAAAAAGGTCAAGCTTTACAATTTTAA	ATGGTTAACGTTCCAAAAACTAGAAAAACCTACTGTAAAGGTAAAGAATGTAGAAAACATACTCAACATAAAGTTACCCAATACAAAGCTGGTAAAGCTTCATTATTTGCTCAAGGTAAAAGAAGATATGACAGAAAACAATCTGGTTTCGGTGGTCAAACCAAACCAGTTTTCCACAAGAAAGCTAAAACCACAAAAAAAGTTGTTTTAAGATTGGAATGTGTTGTTTGTAAAACCAAAGCTCAATTAGCATTGAAAAGATGTAAACATTTCGAATTGGGTGGTGATAAAAAACAAAAAGGTCAAGCTTTACAATTTTAA	151		151	GGTGGTCAAACCAAA	VALID	CCA	Proline
yHMPu5000037254_candida_parachauliodis_210210_g002615.m1	4236	ATGGTTAACGTTCCAAAAACTAGAAAGACCTACTGTAAAGGTAAAGAATGTAGAAAACATACTCAACATAAAGTTACCCAATATAAAGCTGGTAAAGCTTCCTTATTTGCCCAAGGTAAAAGAAGATATGACAGAAAACAATCTGGTTTCGGTGGTCAAACCAAACCAGTTTTCCACAAAAAGGCTAAAACCACAAAAAAAGTTGTTTTAAGATTGGAATGTGTTGTTTGTAAAACCAAAGCTCAATTAGCTTTAAAGAGATGTAAACATTTCGAATTGGGTGGTGATAAAAAACAAAAAGGTCAAGCTTTACAATTTTAA	ATGGTTAACGTTCCAAAAACTAGAAAGACCTACTGTAAAGGTAAAGAATGTAGAAAACATACTCAACATAAAGTTACCCAATATAAAGCTGGTAAAGCTTCCTTATTTGCCCAAGGTAAAAGAAGATATGACAGAAAACAATCTGGTTTCGGTGGTCAAACCAAACCAGTTTTCCACAAAAAGGCTAAAACCACAAAAAAAGTTGTTTTAAGATTGGAATGTGTTGTTTGTAAAACCAAAGCTCAATTAGCTTTAAAGAGATGTAAACATTTCGAATTGGGTGGTGATAAAAAACAAAAAGGTCAAGCTTTACAATTTTAA	151		151	GGTGGTCAAACCAAA	VALID	CCA	Proline
yHMPu5000038362_candida_sakaeoensis_170713_g001750.m1	4236	ATGGTTAACGTTCCAAAAACAAGAAAAACCTACTGTAAAGGTAAAGAATGTAGAAAACACACTCAACATAAAGTTACCCAATACAAAGCTGGTAAAGCTTCTTTATTCGCTCAAGGTAAAAGAAGATATGACAGAAAACAATCTGGTTTCGGTGGTCAAACCAAACCAGTTTTCCACAAGAAAGCTAAAACCACAAAGAAAGTCGTTTTGAGATTGGAATGTGTCGTCTGTAAGACCAAAGCCCAATTAGCCTTGAAAAGATGTAAACATTTCGAATTGGGTGGTGATAAAAAACAAAAAGGTCAAGCTTTACAATTTTAA	ATGGTTAACGTTCCAAAAACAAGAAAAACCTACTGTAAAGGTAAAGAATGTAGAAAACACACTCAACATAAAGTTACCCAATACAAAGCTGGTAAAGCTTCTTTATTCGCTCAAGGTAAAAGAAGATATGACAGAAAACAATCTGGTTTCGGTGGTCAAACCAAACCAGTTTTCCACAAGAAAGCTAAAACCACAAAGAAAGTCGTTTTGAGATTGGAATGTGTCGTCTGTAAGACCAAAGCCCAATTAGCCTTGAAAAGATGTAAACATTTCGAATTGGGTGGTGATAAAAAACAAAAAGGTCAAGCTTTACAATTTTAA	151		151	GGTGGTCAAACCAAA	VALID	CCA	Proline
yHMPu5000038379_candida_lidongshanica_180604_g000554.m1	4236	ATGGTTAACGTTCCAAAAACTAGAAAGACCTACTGTAAAGGTAAGGAATGTCGTAAGCACACTCAACACAAGGTTACCCAATACAAGGCTGGTAAGGCTTCTTTGTTCGCTCAAGGTAAGAGAAGATATGACAGAAAGCAATCCGGTTTCGGTGGTCAAACCAAGCCAGTTTTCCACAAGAAGGCTAAGACTACCAAGAAGGTTGTCTTGAGATTGGAATGTGTCGTCTGCAAGACCAAGGCTCAATTAGCTTTAAAGAGATGTAAGCACTTTGAATTGGGTGGTGACAAGAAGCAAAAGGGTCAAGCTTTGCAATTCTAA	ATGGTTAACGTTCCAAAAACTAGAAAGACCTACTGTAAAGGTAAGGAATGTCGTAAGCACACTCAACACAAGGTTACCCAATACAAGGCTGGTAAGGCTTCTTTGTTCGCTCAAGGTAAGAGAAGATATGACAGAAAGCAATCCGGTTTCGGTGGTCAAACCAAGCCAGTTTTCCACAAGAAGGCTAAGACTACCAAGAAGGTTGTCTTGAGATTGGAATGTGTCGTCTGCAAGACCAAGGCTCAATTAGCTTTAAAGAGATGTAAGCACTTTGAATTGGGTGGTGACAAGAAGCAAAAGGGTCAAGCTTTGCAATTCTAA	151		151	GGTGGTCAAACCAAG	VALID	CCA	Proline
yHMPu5000041849_candida_morakotiae_180604_g003405.m1	4236	ATGGTTAACGTTCCAAAAACAAGAAAAACCTACTGTAAAGGTAAAGAATGTAGAAAACATACTCAACATAAAGTTACCCAATACAAAGCTGGTAAAGCTTCATTATTTGCTCAAGGTAAAAGAAGATATGACAGAAAACAATCAGGTTTCGGTGGTCAAACTAAACCAGTTTTCCACAAAAAAGCTAAAACTACCAAAAAAGTTGTTTTAAGATTAGAATGTGTTGTTTGTAAAACTAAAGCTCAATTAGCATTAAAAAGATGTAAACATTTCGAATTGGGTGGTGATAAAAAACAAAAAGGTCAAGCCTTACAATTTTAA	ATGGTTAACGTTCCAAAAACAAGAAAAACCTACTGTAAAGGTAAAGAATGTAGAAAACATACTCAACATAAAGTTACCCAATACAAAGCTGGTAAAGCTTCATTATTTGCTCAAGGTAAAAGAAGATATGACAGAAAACAATCAGGTTTCGGTGGTCAAACTAAACCAGTTTTCCACAAAAAAGCTAAAACTACCAAAAAAGTTGTTTTAAGATTAGAATGTGTTGTTTGTAAAACTAAAGCTCAATTAGCATTAAAAAGATGTAAACATTTCGAATTGGGTGGTGATAAAAAACAAAAAGGTCAAGCCTTACAATTTTAA	151		151	GGTGGTCAAACTAAA	VALID	CCA	Proline
yHMPu5000035670_phaffomyces_opuntiae_160613_g004448.m1	4236	ATGGTTAACGTTCCAAAAACCAGAAAAACCTACTGTAAAGGTAAAGAATGTAAAAAACACACTCAACACAAAGTTACCCAATACAAAGCTGGTAAAGCTTCTTTATTTGCTCAAGGTAAAAGACGTTATGACCGTAAACAATCCGGTTTTGGTGGTCAAACTAAACCAGTTTTCCATAAAAAGGCTAAAACTACCAAAAAAGTTGTCTTACGTTTAGAATGTGTTGTCTGTAAAACCAGAGCTCAATTATCATTAAAACGTTGTAAACATTTTGAATTAGGTGGTGACAGAAAACAAAAAGGTCAAGCTTTACAATTCTAG	ATGGTTAACGTTCCAAAAACCAGAAAAACCTACTGTAAAGGTAAAGAATGTAAAAAACACACTCAACACAAAGTTACCCAATACAAAGCTGGTAAAGCTTCTTTATTTGCTCAAGGTAAAAGACGTTATGACCGTAAACAATCCGGTTTTGGTGGTCAAACTAAACCAGTTTTCCATAAAAAGGCTAAAACTACCAAAAAAGTTGTCTTACGTTTAGAATGTGTTGTCTGTAAAACCAGAGCTCAATTATCATTAAAACGTTGTAAACATTTTGAATTAGGTGGTGACAGAAAACAAAAAGGTCAAGCTTTACAATTCTAG	151		151	GGTGGTCAAACTAAA	VALID	CCA	Proline
yHMPu5000038119_candida_coquimbonensis_170912_g005236.m1	4236	ATGGTTAACGTTCCAAAAACCAGAAAAACCTACTGTAAAGGTAAAGAATGTAAAAAACACACTCAACACAAAGTTACCCAATACAAAGCTGGTAAAGCTTCTTTGTTTGCTCAAGGTAAAAGACGTTATGACCGTAAACAATCCGGTTTTGGTGGTCAAACTAAACCAGTTTTCCATAAAAAGGCTAAAACTACCAAAAAAGTTGTCTTACGTTTAGAATGTGTTGTCTGTAAAACCAGAGCTCAATTATCATTAAAACGTTGTAAACATTTTGAATTAGGTGGTGACAGAAAACAAAAAGGTCAAGCTTTACAATTCTAG	ATGGTTAACGTTCCAAAAACCAGAAAAACCTACTGTAAAGGTAAAGAATGTAAAAAACACACTCAACACAAAGTTACCCAATACAAAGCTGGTAAAGCTTCTTTGTTTGCTCAAGGTAAAAGACGTTATGACCGTAAACAATCCGGTTTTGGTGGTCAAACTAAACCAGTTTTCCATAAAAAGGCTAAAACTACCAAAAAAGTTGTCTTACGTTTAGAATGTGTTGTCTGTAAAACCAGAGCTCAATTATCATTAAAACGTTGTAAACATTTTGAATTAGGTGGTGACAGAAAACAAAAAGGTCAAGCTTTACAATTCTAG	151		151	GGTGGTCAAACTAAA	VALID	CCA	Proline
yHMPu5000035672_phaffomyces_thermotolerans_160613_g000040.m1	4236	ATGGTTAACGTTCCAAAAACCAGAAAAACCTACTGTAAAGGTAAAGAATGTAAAAAACACACTCAACACAAAGTTACCCAATACAAAGCTGGTAAAGCTTCATTATTTGCCCAAGGTAAAAGACGTTATGACCGTAAACAATCCGGTTTTGGTGGTCAAACCAAACCAGTTTTCCACAAAAAAGCTAAAACTACCAAAAAAGTTGTCTTACGTTTAGAATGTGTTGTCTGTAAAACCAAAGCTCAATTATCATTAAAACGTTGTAAACATTTTGAATTAGGTGGTGACAGAAAACAAAAAGGTCAAGCTTTACAATTCTAG	ATGGTTAACGTTCCAAAAACCAGAAAAACCTACTGTAAAGGTAAAGAATGTAAAAAACACACTCAACACAAAGTTACCCAATACAAAGCTGGTAAAGCTTCATTATTTGCCCAAGGTAAAAGACGTTATGACCGTAAACAATCCGGTTTTGGTGGTCAAACCAAACCAGTTTTCCACAAAAAAGCTAAAACTACCAAAAAAGTTGTCTTACGTTTAGAATGTGTTGTCTGTAAAACCAAAGCTCAATTATCATTAAAACGTTGTAAACATTTTGAATTAGGTGGTGACAGAAAACAAAAAGGTCAAGCTTTACAATTCTAG	151		151	GGTGGTCAAACCAAA	VALID	CCA	Proline
yHMPu5000035673_candida_orba_160613_g003357.m1	4236	ATGGTTAACGTTCCAAAAACCAGAAAAACCTACTGTAAAGGTAAAGAATGTAAAAAACACACTCAACACAAAGTTACCCAATACAAAGCTGGTAAAGCTTCATTATTTGCTCAAGGTAAAAGACGTTATGACCGTAAACAATCCGGTTTTGGTGGTCAAACCAAACCAGTCTTCCACAAAAAGGCTAAAACTACCAAAAAAGTTGTCTTACGTTTAGAATGTGTTGTCTGTAAAACCAGAGCTCAATTATCATTAAAACGTTGTAAACATTTTGAATTAGGTGGTGACAAAAAACAAAAAGGTCAAGCTTTACAATTCTAG	ATGGTTAACGTTCCAAAAACCAGAAAAACCTACTGTAAAGGTAAAGAATGTAAAAAACACACTCAACACAAAGTTACCCAATACAAAGCTGGTAAAGCTTCATTATTTGCTCAAGGTAAAAGACGTTATGACCGTAAACAATCCGGTTTTGGTGGTCAAACCAAACCAGTCTTCCACAAAAAGGCTAAAACTACCAAAAAAGTTGTCTTACGTTTAGAATGTGTTGTCTGTAAAACCAGAGCTCAATTATCATTAAAACGTTGTAAACATTTTGAATTAGGTGGTGACAAAAAACAAAAAGGTCAAGCTTTACAATTCTAG	151		151	GGTGGTCAAACCAAA	VALID	CCA	Proline
yHMPu5000040931_candida_galis_201018_g004320.m1	4236	ATGGTTAACGTTCCAAAAACCAGAAAAACTTACTGTAAAGGTAAAGAATGTCGTAAACACACTCAACACAAAGTTACCCAATACAAAGCTGGTAAAGCCTCATTATTTGCTCAAGGTAAAAGACGTTATGACCGTAAACAATCCGGTTTCGGTGGTCAAACCAAACCAGTCTTCCACAAAAAGGCTAAAACTACCAAAAAAGTTGTTTTACGTTTAGAATGTGTTGTCTGTAAAACCAGAGCTCAATTATCATTAAAACGTTGTAAACATTTTGAATTAGGTGGTGACAAAAAACAAAAAGGTCAAGCTTTACAATTCTAG	ATGGTTAACGTTCCAAAAACCAGAAAAACTTACTGTAAAGGTAAAGAATGTCGTAAACACACTCAACACAAAGTTACCCAATACAAAGCTGGTAAAGCCTCATTATTTGCTCAAGGTAAAAGACGTTATGACCGTAAACAATCCGGTTTCGGTGGTCAAACCAAACCAGTCTTCCACAAAAAGGCTAAAACTACCAAAAAAGTTGTTTTACGTTTAGAATGTGTTGTCTGTAAAACCAGAGCTCAATTATCATTAAAACGTTGTAAACATTTTGAATTAGGTGGTGACAAAAAACAAAAAGGTCAAGCTTTACAATTCTAG	151		151	GGTGGTCAAACCAAA	VALID	CCA	Proline
scheffersomyces_stambukii_g001704.m1	4236	ATGTTATCCAAATTCTTGATATCCTTGGCTACATCTTTATTGATGATACCCGCGATTGCTGCACCCACAAAAGAAAACCGAATTAAACGTAACGATGACGATGTGGTCACTGTCAAATTGAAAACAACTGTCGTACAGCTCCATACAAACTTTCATACTGTTGCTGCACCTACTCAGACTTTCACAAGTACCAGCATCAATGTGACCACTAAAACTGTCACTCTGTACACAGCAACTGTGACATCAACAATTTTTGGAGTTCCAAAAACATTTACTACAGTAGCAACTACTCCAGTGTCTGCTGCTGATGTTGTTCCTAACAGTGAAAATGAAGTGAAAACTGAAGACAATACCCAAGATGCTAAAACCAGTGACCTTGAAACAGAATCAACTCCTACA…	ATGTTATCCAAATTCTTGATATCCTTGGCTACATCTTTATTGATGATACCCGCGATTGCTGCACCCACAAAAGAAAACCGAATTAAACGTAACGATGACGATGTGGTCACTGTCAAATTGAAAACAACTGTCGTACAGCTCCATACAAACTTTCATACTGTTGCTGCACCTACTCAGACTTTCACAAGTACCAGCATCAATGTGACCACTAAAACTGTCACTCTGTACACAGCAACTGTGACATCAACAATTTTTGGAGTTCCAAAAACATTTACTACAGTAGCAACTACTCCAGTGTCTGCTGCTGATGTTGTTCCTAACAGTGAAAATGAAGTGAAAACTGAAGACAATACCCAAGATGCTAAAACCAGTGACCTTGAAACAGAATCAACTCCTACA…	#VALUE!	937	#VALUE!	#VALUE!	#VALUE!	#VALUE!	#VALUE!
yHMPu5000038060_kodamaea_kakaduensis_170912_g006126.m1	4236	ATGCAATTGTCCAAATTCCACATCCTTCTTGCCGTGCTCAATGCGGTCAGTGCTCGTGCCATCAAGCGCGATGACGATCCCGTTGTGGTCCACTTGACCACAACCTTGCAGAACACCCACACAAGCGACGTCACGGTGGAGGCTTCTACTGAAACGGCCACCAACTTGGTGGTGAACACTGCCACAGAAACAGTGACTAGGTATACTGCTACAGTGACCTCTACTGTTTTTGGAAGTGCGGTGACCTACACAACAGTGGCTACTACTCCGATTAGTCAGGTTCAGGGCTTGACCAGTACTAGTACCGAAGGTACTAGTACTGAATCAGAGAGTACTACACAAGGTACAAGTACGACAGAAGGTACAAGTACAACAGGTACAACAGAAACTAGTACTCAA…	ATGCAATTGTCCAAATTCCACATCCTTCTTGCCGTGCTCAATGCGGTCAGTGCTCGTGCCATCAAGCGCGATGACGATCCCGTTGTGGTCCACTTGACCACAACCTTGCAGAACACCCACACAAGCGACGTCACGGTGGAGGCTTCTACTGAAACGGCCACCAACTTGGTGGTGAACACTGCCACAGAAACAGTGACTAGGTATACTGCTACAGTGACCTCTACTGTTTTTGGAAGTGCGGTGACCTACACAACAGTGGCTACTACTCCGATTAGTCAGGTTCAGGGCTTGACCAGTACTAGTACCGAAGGTACTAGTACTGAATCAGAGAGTACTACACAAGGTACAAGTACGACAGAAGGTACAAGTACAACAGGTACAACAGAAACTAGTACTCAA…	#VALUE!	988	#VALUE!	#VALUE!	#VALUE!	#VALUE!	#VALUE!
yHMPu5000037886_candida_sagamina_180604_g003204.m1	4236	ATGGTGCTCCTCGACTGGAGAGCGGAGGAAACGGACACACGAGACCCTGCCTTCCCCAAACCGTCGCACTACCACCAACCAATACTAACACCAACAGTTAACGTCCCAAAAACTAGAAAGACCTACTGTAAGGGTAAGGAATGCCGCAAGCACACCCAGCACAAGGTTACCCAGTACAAGGCTGGTAAGGCTTCTTTGTTTGCCCAGGGTAAGAGAAGATATGACAGAAAGCAATCTGGTTTCGGTGGTCAGACCAAGCCAGTTTTCCACAAGAAGGCCAAGACCACCAAGAAGGTTGTCTTGAGATTGGAATGTGTTGTCTGCAAGACCAAGGCTCAGTTGTCTTTGAAGAGATGTAAGCACTTTGAGTTGGGTGGTGACAAGAAGCAGAAGGGTCAA…	ATGGTGCTCCTCGACTGGAGAGCGGAGGAAACGGACACACGAGACCCTGCCTTCCCCAAACCGTCGCACTACCACCAACCAATACTAACACCAACAGTTAACGTCCCAAAAACTAGAAAGACCTACTGTAAGGGTAAGGAATGCCGCAAGCACACCCAGCACAAGGTTACCCAGTACAAGGCTGGTAAGGCTTCTTTGTTTGCCCAGGGTAAGAGAAGATATGACAGAAAGCAATCTGGTTTCGGTGGTCAGACCAAGCCAGTTTTCCACAAGAAGGCCAAGACCACCAAGAAGGTTGTCTTGAGATTGGAATGTGTTGTCTGCAAGACCAAGGCTCAGTTGTCTTTGAAGAGATGTAAGCACTTTGAGTTGGGTGGTGACAAGAAGCAGAAGGGTCAA…	#VALUE!	244	#VALUE!	#VALUE!	#VALUE!	#VALUE!	#VALUE!
yHMPu5000034594_Starmera_quercuum_p31_SPADES_g007230.m1	4236	ATGGAACATGGGAGCACACCCTGGATAGTTTTGCAGACGAGTGAATTGTGTGGTCATGAGAAGTTGAAGAGCGCGAGTTCTGTTCAGAAATCAAGAGTCAAAGACAACGATGAAGATCCTGAGTTACTGTGCATGTTTCAAATCAAGAACCAGCAGCCACATACGATTGTACCTTTTTTTCGTGAGGAGATGCGCCTGGGAGCTCAAAAGGCAAGTGGAAAGGTATCACTAGGGCACATGATTAACGTTCCAAAGACTAGAAAAACCTATTGCAAAGGTAAAGAGTGTCGCAAGCACACCCAACACAAAGTCACTCAGTACAAAGCTGGTAAAGCTTCCTTATTTGCTCAAGGTAAACGTCGTTATGACCGTAAACAAGCCGGTTACGGTGGTCAAACC…	ATGGAACATGGGAGCACACCCTGGATAGTTTTGCAGACGAGTGAATTGTGTGGTCATGAGAAGTTGAAGAGCGCGAGTTCTGTTCAGAAATCAAGAGTCAAAGACAACGATGAAGATCCTGAGTTACTGTGCATGTTTCAAATCAAGAACCAGCAGCCACATACGATTGTACCTTTTTTTCGTGAGGAGATGCGCCTGGGAGCTCAAAAGGCAAGTGGAAAGGTATCACTAGGGCACATGATTAACGTTCCAAAGACTAGAAAAACCTATTGCAAAGGTAAAGAGTGTCGCAAGCACACCCAACACAAAGTCACTCAGTACAAAGCTGGTAAAGCTTCCTTATTTGCTCAAGGTAAACGTCGTTATGACCGTAAACAAGCCGGTTACGGTGGTCAAACC…	388		388	GGTGGTCAAACCAAA	VALID	CCA	Proline
candida_auris_g000281.m1	4236	ATGGTTAACGTCCCAAAAACCAGAAGAACCTACTGCAAGGGCAAGGACTGCAAGAAGCACACCCAGCACAAGGTCACCCAGTACAAGGCTGGTAAGGCTTCCTTGTTTGCCCAGGGTAAGAGAAGATACGACCGTAAGCAGAGCGGTTACGGTGGTCAGACCAAGCCAGTTTTCCACAAGAAGGCTAAGACCACCAAGAAGGTTGTCTTGAGATTGGAGTGTGTTGTCTGCAAGACCAAGGCCCAGTTGGCTTTGAAGAGATGTAAGCACTTTGAGTTGGGTGGTGACAAGAAGCAGAAGGGCCAGGCCTTGCAGTTCTAA	ATGGTTAACGTCCCAAAAACCAGAAGAACCTACTGCAAGGGCAAGGACTGCAAGAAGCACACCCAGCACAAGGTCACCCAGTACAAGGCTGGTAAGGCTTCCTTGTTTGCCCAGGGTAAGAGAAGATACGACCGTAAGCAGAGCGGTTACGGTGGTCAGACCAAGCCAGTTTTCCACAAGAAGGCTAAGACCACCAAGAAGGTTGTCTTGAGATTGGAGTGTGTTGTCTGCAAGACCAAGGCCCAGTTGGCTTTGAAGAGATGTAAGCACTTTGAGTTGGGTGGTGACAAGAAGCAGAAGGGCCAGGCCTTGCAGTTCTAA	#VALUE!	151	#VALUE!	#VALUE!	#VALUE!	#VALUE!	#VALUE!
yHMPu5000037929_candida_auris_170210_g002219.m1	4236	ATGGTTAACGTCCCAAAAACCAGAAGAACCTACTGCAAGGGCAAGGACTGCAAGAAGCACACCCAGCACAAGGTCACCCAGTACAAGGCTGGTAAGGCTTCCTTGTTTGCCCAGGGTAAGAGAAGATACGACCGTAAGCAGAGCGGTTACGGTGGTCAGACCAAGCCAGTTTTCCACAAGAAGGCTAAGACCACCAAGAAGGTTGTCTTGAGATTGGAGTGTGTTGTCTGCAAGACCAAGGCCCAGTTGGCTTTGAAGAGATGTAAGCACTTTGAGTTGGGTGGTGACAAGAAGCAGAAGGGCCAGGCCTTGCAGTTCTAA	ATGGTTAACGTCCCAAAAACCAGAAGAACCTACTGCAAGGGCAAGGACTGCAAGAAGCACACCCAGCACAAGGTCACCCAGTACAAGGCTGGTAAGGCTTCCTTGTTTGCCCAGGGTAAGAGAAGATACGACCGTAAGCAGAGCGGTTACGGTGGTCAGACCAAGCCAGTTTTCCACAAGAAGGCTAAGACCACCAAGAAGGTTGTCTTGAGATTGGAGTGTGTTGTCTGCAAGACCAAGGCCCAGTTGGCTTTGAAGAGATGTAAGCACTTTGAGTTGGGTGGTGACAAGAAGCAGAAGGGCCAGGCCTTGCAGTTCTAA	#VALUE!	151	#VALUE!	#VALUE!	#VALUE!	#VALUE!	#VALUE!
yHMPu5000038120_candida_haemulonii_170912_g001005.m1	4236	ATGGTTAACGTTCCAAAGACCAGAAGAACCTACTGCAAGGGTAAGGATTGCAAGAAGCACACCCAGCACAAGGTCACCCAGTACAAGGCCGGTAAGGCTTCCTTGTTCGCCCAGGGTAAGAGAAGATACGACCGTAAGCAGAGTGGTTACGGTGGTCAGACCAAGCCCGTTTTCCACAAGAAGGCCAAGACCACCAAGAAGGTCGTCTTGAGATTGGAATGTGTTGTTTGCAAGACCAAGGCCCAGTTGGCTTTGAAGAGATGTAAGCACTTCGAGTTGGGTGGTGACAAGAAGCAGAAGGGCCAGGCCTTGCAGTTCTAA	ATGGTTAACGTTCCAAAGACCAGAAGAACCTACTGCAAGGGTAAGGATTGCAAGAAGCACACCCAGCACAAGGTCACCCAGTACAAGGCCGGTAAGGCTTCCTTGTTCGCCCAGGGTAAGAGAAGATACGACCGTAAGCAGAGTGGTTACGGTGGTCAGACCAAGCCCGTTTTCCACAAGAAGGCCAAGACCACCAAGAAGGTCGTCTTGAGATTGGAATGTGTTGTTTGCAAGACCAAGGCCCAGTTGGCTTTGAAGAGATGTAAGCACTTCGAGTTGGGTGGTGACAAGAAGCAGAAGGGCCAGGCCTTGCAGTTCTAA	#VALUE!	151	#VALUE!	#VALUE!	#VALUE!	#VALUE!	#VALUE!
yHMPu5000041843_candida_ruelliae_170713_g004757.m1	4236	ATGGTTAACGTTCCAAAGACCAGAAGAACTTACTGCAAGGGTAAGGACTGCAAGAAGCACACCCAGCACAAGGTCACCCAGTACAAGGCCGGTAAGGCTTCCTTGTTCGCCCAGGGTAAGAGAAGATACGACCGTAAGCAGAGTGGTTACGGTGGTCAGACCAAGCCAGTCTTCCACAAGAAGGCCAAGACCACCAAGAAGGTTGTCTTGAGATTGGAATGTGTTGTTTGCAAGACCAAGGCTCAGTTGGCTTTGAAGAGATGTAAGCACTTCGAGTTGGGTGGTGACAAGAAGCAGAAGGGCCAGGCCTTGCAGTTCTAA	ATGGTTAACGTTCCAAAGACCAGAAGAACTTACTGCAAGGGTAAGGACTGCAAGAAGCACACCCAGCACAAGGTCACCCAGTACAAGGCCGGTAAGGCTTCCTTGTTCGCCCAGGGTAAGAGAAGATACGACCGTAAGCAGAGTGGTTACGGTGGTCAGACCAAGCCAGTCTTCCACAAGAAGGCCAAGACCACCAAGAAGGTTGTCTTGAGATTGGAATGTGTTGTTTGCAAGACCAAGGCTCAGTTGGCTTTGAAGAGATGTAAGCACTTCGAGTTGGGTGGTGACAAGAAGCAGAAGGGCCAGGCCTTGCAGTTCTAA	#VALUE!	151	#VALUE!	#VALUE!	#VALUE!	#VALUE!	#VALUE!
yHMPu5000034989_candida_duobushaemulonii_160519_g000633.m1	4236	ATGGTTAACGTTCCAAAGACCAGAAAGACCTACTGCAAGGGTAAGGACTGCAAGAAGCACACCCAGCACAAGGTCACCCAGTACAAGGCCGGTAAGGCTTCCTTGTTCGCCCAGGGTAAGAGAAGATACGACCGTAAGCAGTCCGGTTACGGTGGTCAGACCAAGCCCGTTTTCCACAAGAAGGCCAAGACCACCAAGAAGGTTGTCTTGAGATTGGAGTGTGTTGTTTGCAAGACCAAGGCCCAGTTGGCTTTGAAGAGATGTAAGCACTTCGAGTTGGGTGGTGACAAGAAGCAGAAGGGCCAGGCCTTGCAGTTCTAA	ATGGTTAACGTTCCAAAGACCAGAAAGACCTACTGCAAGGGTAAGGACTGCAAGAAGCACACCCAGCACAAGGTCACCCAGTACAAGGCCGGTAAGGCTTCCTTGTTCGCCCAGGGTAAGAGAAGATACGACCGTAAGCAGTCCGGTTACGGTGGTCAGACCAAGCCCGTTTTCCACAAGAAGGCCAAGACCACCAAGAAGGTTGTCTTGAGATTGGAGTGTGTTGTTTGCAAGACCAAGGCCCAGTTGGCTTTGAAGAGATGTAAGCACTTCGAGTTGGGTGGTGACAAGAAGCAGAAGGGCCAGGCCTTGCAGTTCTAA	#VALUE!	151	#VALUE!	#VALUE!	#VALUE!	#VALUE!	#VALUE!
yHMPu5000035705_candida_pseudohaemulonii_160613_g001346.m1	4236	ATGGTTAACGTTCCAAAGACCAGAAAGACCTACTGCAAGGGTAAGGACTGCAAGAAGCACACCCAGCACAAGGTCACCCAGTACAAGGCCGGTAAGGCTTCCTTGTTCGCCCAGGGTAAGAGAAGATACGACCGTAAGCAGTCCGGTTACGGTGGTCAGACCAAGCCCGTTTTCCACAAGAAGGCCAAGACCACCAAGAAGGTTGTCTTGAGATTGGAGTGTGTTGTTTGCAAGACCAAGGCCCAGTTGGCTTTGAAGAGATGTAAGCACTTCGAGTTGGGTGGTGACAAGAAGCAGAAGGGCCAGGCCTTGCAGTTCTAA	ATGGTTAACGTTCCAAAGACCAGAAAGACCTACTGCAAGGGTAAGGACTGCAAGAAGCACACCCAGCACAAGGTCACCCAGTACAAGGCCGGTAAGGCTTCCTTGTTCGCCCAGGGTAAGAGAAGATACGACCGTAAGCAGTCCGGTTACGGTGGTCAGACCAAGCCCGTTTTCCACAAGAAGGCCAAGACCACCAAGAAGGTTGTCTTGAGATTGGAGTGTGTTGTTTGCAAGACCAAGGCCCAGTTGGCTTTGAAGAGATGTAAGCACTTCGAGTTGGGTGGTGACAAGAAGCAGAAGGGCCAGGCCTTGCAGTTCTAA	#VALUE!	151	#VALUE!	#VALUE!	#VALUE!	#VALUE!	#VALUE!
yHMPu5000035707_candida_heveicola_160519_g004796.m1	4236	ATGGTTAACGTTCCAAAGACCAGAAAGACCTACTGTAAGGGTAAGGACTGCAAGAAGCACACCCAGCACAAGGTCACCCAGTACAAGGCCGGTAAGGCTTCCTTGTTCGCCCAGGGTAAGAGAAGATACGACCGTAAGCAGAGCGGTTACGGTGGTCAGACCAAGCCCGTTTTCCACAAGAAGGCCAAGACCACCAAGAAGGTTGTCTTGAGATTGGAGTGTGTTGTTTGCAAGACCAAGGCCCAGTTGGCTTTGAAGAGATGCAAGCACTTCGAGTTGGGTGGTGACAAGAAGCAGAAGGGCCAGGCCTTGCAGTTCTAA	ATGGTTAACGTTCCAAAGACCAGAAAGACCTACTGTAAGGGTAAGGACTGCAAGAAGCACACCCAGCACAAGGTCACCCAGTACAAGGCCGGTAAGGCTTCCTTGTTCGCCCAGGGTAAGAGAAGATACGACCGTAAGCAGAGCGGTTACGGTGGTCAGACCAAGCCCGTTTTCCACAAGAAGGCCAAGACCACCAAGAAGGTTGTCTTGAGATTGGAGTGTGTTGTTTGCAAGACCAAGGCCCAGTTGGCTTTGAAGAGATGCAAGCACTTCGAGTTGGGTGGTGACAAGAAGCAGAAGGGCCAGGCCTTGCAGTTCTAA	#VALUE!	151	#VALUE!	#VALUE!	#VALUE!	#VALUE!	#VALUE!
yHMPu5000037224_candida_vulturna_210210_g002542.m1	4236	ATGGTTAACGTTCCAAAGACCAGAAAGACCTACTGCAAGGGTAAGGACTGCAAGAAGCACACCCAGCACAAGGTCACCCAGTACAAGGCCGGTAAGGCTTCCTTGTTCGCCCAGGGTAAGAGAAGATACGACCGTAAGCAGTCCGGTTACGGTGGTCAGACCAAGCCCGTTTTCCACAAGAAGGCCAAGACCACCAAGAAGGTTGTCTTGAGATTGGAGTGTGTTGTTTGCAAGACCAAGGCCCAGTTGGCTTTGAAGAGATGTAAGCACTTCGAGTTGGGTGGTGACAAGAAGCAGAAGGGCCAGGCCTTGCAGTTCTAA	ATGGTTAACGTTCCAAAGACCAGAAAGACCTACTGCAAGGGTAAGGACTGCAAGAAGCACACCCAGCACAAGGTCACCCAGTACAAGGCCGGTAAGGCTTCCTTGTTCGCCCAGGGTAAGAGAAGATACGACCGTAAGCAGTCCGGTTACGGTGGTCAGACCAAGCCCGTTTTCCACAAGAAGGCCAAGACCACCAAGAAGGTTGTCTTGAGATTGGAGTGTGTTGTTTGCAAGACCAAGGCCCAGTTGGCTTTGAAGAGATGTAAGCACTTCGAGTTGGGTGGTGACAAGAAGCAGAAGGGCCAGGCCTTGCAGTTCTAA	#VALUE!	151	#VALUE!	#VALUE!	#VALUE!	#VALUE!	#VALUE!
yHMPu5000038397_candida_chanthaburiensis_170713_g000849.m1	4236	ATGGTTAACGTTCCAAAGACCAGAAAGACCTACTGTAAGGGTAAGGACTGCAAGAAGCACACCCAGCACAAGGTCACTCAGTACAAGGCCGGTAAGGCTTCCTTGTTCGCCCAGGGTAAGAGAAGATACGACCGTAAGCAGAGCGGTTACGGTGGTCAGACCAAGCCCGTTTTCCACAAGAAGGCCAAGACCACCAAGAAGGTTGTCTTGAGATTGGAGTGTGTTGTTTGCAAGACCAAGGCCCAGTTGGCTTTGAAGAGATGCAAGCACTTCGAGTTGGGTGGTGACAAGAAGCAGAAGGGCCAGGCCTTGCAGTTCTAA	ATGGTTAACGTTCCAAAGACCAGAAAGACCTACTGTAAGGGTAAGGACTGCAAGAAGCACACCCAGCACAAGGTCACTCAGTACAAGGCCGGTAAGGCTTCCTTGTTCGCCCAGGGTAAGAGAAGATACGACCGTAAGCAGAGCGGTTACGGTGGTCAGACCAAGCCCGTTTTCCACAAGAAGGCCAAGACCACCAAGAAGGTTGTCTTGAGATTGGAGTGTGTTGTTTGCAAGACCAAGGCCCAGTTGGCTTTGAAGAGATGCAAGCACTTCGAGTTGGGTGGTGACAAGAAGCAGAAGGGCCAGGCCTTGCAGTTCTAA	#VALUE!	151	#VALUE!	#VALUE!	#VALUE!	#VALUE!	#VALUE!
yHMPu5000040919_candida_konsanensis_201018_g003316.m1	4236	ATGGTTAACGTTCCAAAGACCAGAAAGACCTACTGTAAGGGTAAGGACTGCAAGAAGCACACCCAGCACAAGGTCACTCAGTACAAGGCCGGTAAGGCTTCCTTGTTCGCCCAGGGTAAGAGAAGATACGACCGTAAGCAGAGCGGTTACGGTGGTCAGACCAAGCCCGTTTTCCACAAGAAGGCCAAGACCACCAAGAAGGTTGTCTTGAGATTGGAGTGTGTTGTTTGCAAGACCAAGGCCCAGTTGGCTTTGAAGAGATGCAAGCACTTCGAGTTGGGTGGTGACAAGAAGCAGAAGGGCCAGGCCTTGCAGTTCTAA	ATGGTTAACGTTCCAAAGACCAGAAAGACCTACTGTAAGGGTAAGGACTGCAAGAAGCACACCCAGCACAAGGTCACTCAGTACAAGGCCGGTAAGGCTTCCTTGTTCGCCCAGGGTAAGAGAAGATACGACCGTAAGCAGAGCGGTTACGGTGGTCAGACCAAGCCCGTTTTCCACAAGAAGGCCAAGACCACCAAGAAGGTTGTCTTGAGATTGGAGTGTGTTGTTTGCAAGACCAAGGCCCAGTTGGCTTTGAAGAGATGCAAGCACTTCGAGTTGGGTGGTGACAAGAAGCAGAAGGGCCAGGCCTTGCAGTTCTAA	#VALUE!	151	#VALUE!	#VALUE!	#VALUE!	#VALUE!	#VALUE!
yHMPu5000034633_candida_smithsonii_180604_g002334.m1	4236	ATGGTGAACGTTCCAAAGACCAGAAGAACCTACTGTAAGGGTAAGGACTGCCGTAAGCACACCCAGCACAAGGTGACCCAATACAAGGCTGGTAAGGCCTCTTTGTTCGCCCAGGGTAAGAGAAGATACGACCGTAAGCAATCCGGTTTCGGTGGTCAGACCAAGCCAGTTTTCCACAAGAAGGCCAAGACCACCAAGAAGGTTGTGTTGAGATTGGAGTGTGTTGTTTGCAAGACCAAGGCTCAGCTCTCTTTGAAGAGATGTAAGCACTTTGAATTGGGAGGTGACAAGAAGCAAAAGGGTCAAGCTTTGCAATTTTAA	ATGGTGAACGTTCCAAAGACCAGAAGAACCTACTGTAAGGGTAAGGACTGCCGTAAGCACACCCAGCACAAGGTGACCCAATACAAGGCTGGTAAGGCCTCTTTGTTCGCCCAGGGTAAGAGAAGATACGACCGTAAGCAATCCGGTTTCGGTGGTCAGACCAAGCCAGTTTTCCACAAGAAGGCCAAGACCACCAAGAAGGTTGTGTTGAGATTGGAGTGTGTTGTTTGCAAGACCAAGGCTCAGCTCTCTTTGAAGAGATGTAAGCACTTTGAATTGGGAGGTGACAAGAAGCAAAAGGGTCAAGCTTTGCAATTTTAA	#VALUE!	151	#VALUE!	#VALUE!	#VALUE!	#VALUE!	#VALUE!
yHMPu5000035662_meyerozyma_caribbica_160613_g005639.m1	4236	ATGGTGAACGTTCCAAAGACCAGAAGAACCTACTGCAAGGGTAAAGACTGCCGCAAGCACACCCAACACAAGGTGACCCAATACAAGGCAGGTAAGGCCTCTTTGTTCGCCCAGGGTAAGAGAAGATATGACCGTAAGCAATCCGGTTTTGGTGGTCAAACCAAGCCCGTTTTCCACAAGAAAGCCAAGACTACCAAGAAGGTTGTGTTGAGATTGGAATGTGTTGTTTGCAAGACCAAGGCTCAACTCTCATTGAAGAGATGTAAGCACTTTGAATTGGGAGGTGACAAGAAGCAAAAGGGTCAAGCTTTACAATTTTAA	ATGGTGAACGTTCCAAAGACCAGAAGAACCTACTGCAAGGGTAAAGACTGCCGCAAGCACACCCAACACAAGGTGACCCAATACAAGGCAGGTAAGGCCTCTTTGTTCGCCCAGGGTAAGAGAAGATATGACCGTAAGCAATCCGGTTTTGGTGGTCAAACCAAGCCCGTTTTCCACAAGAAAGCCAAGACTACCAAGAAGGTTGTGTTGAGATTGGAATGTGTTGTTTGCAAGACCAAGGCTCAACTCTCATTGAAGAGATGTAAGCACTTTGAATTGGGAGGTGACAAGAAGCAAAAGGGTCAAGCTTTACAATTTTAA	151		151	GGTGGTCAAACCAAG	VALID	CCC	Proline
yHMPu5000035663_Meyerozyma_guilliermondii_MASURCA_g004096.m1	4236	ATGGTGAACGTTCCAAAGACCAGAAGAACCTACTGCAAGGGTAAAGACTGCCGTAAGCACACCCAACACAAGGTGACCCAATACAAGGCAGGTAAGGCCTCTTTGTTCGCCCAGGGTAAGAGAAGATATGACCGTAAGCAATCCGGTTTCGGTGGTCAAACCAAGCCCGTTTTCCACAAGAAAGCCAAGACTACCAAGAAGGTTGTGTTGAGATTGGAATGTGTTGTTTGCAAGACCAAGGCTCAACTCTCATTGAAGAGATGTAAGCACTTTGAATTGGGAGGTGACAAGAAGCAAAAGGGTCAAGCTTTACAATTTTAA	ATGGTGAACGTTCCAAAGACCAGAAGAACCTACTGCAAGGGTAAAGACTGCCGTAAGCACACCCAACACAAGGTGACCCAATACAAGGCAGGTAAGGCCTCTTTGTTCGCCCAGGGTAAGAGAAGATATGACCGTAAGCAATCCGGTTTCGGTGGTCAAACCAAGCCCGTTTTCCACAAGAAAGCCAAGACTACCAAGAAGGTTGTGTTGAGATTGGAATGTGTTGTTTGCAAGACCAAGGCTCAACTCTCATTGAAGAGATGTAAGCACTTTGAATTGGGAGGTGACAAGAAGCAAAAGGGTCAAGCTTTACAATTTTAA	151		151	GGTGGTCAAACCAAG	VALID	CCC	Proline
yHMPu5000035664_candida_carpophila_160613_g002270.m1	4236	ATGGTGAACGTTCCAAAGACCAGAAGAACCTACTGCAAGGGTAAAGACTGCCGCAAGCACACCCAACACAAGGTGACCCAATACAAGGCAGGTAAGGCCTCTTTGTTTGCCCAGGGTAAGAGAAGATATGACCGTAAGCAATCCGGTTTCGGTGGTCAAACCAAGCCCGTTTTCCACAAGAAAGCCAAGACTACCAAGAAGGTTGTGTTGAGATTGGAATGTGTTGTCTGCAAGACCAAGGCTCAACTCTCATTGAAGAGATGTAAGCACTTTGAATTGGGAGGTGACAAGAAGCAAAAGGGTCAAGCTTTACAATTTTAA	ATGGTGAACGTTCCAAAGACCAGAAGAACCTACTGCAAGGGTAAAGACTGCCGCAAGCACACCCAACACAAGGTGACCCAATACAAGGCAGGTAAGGCCTCTTTGTTTGCCCAGGGTAAGAGAAGATATGACCGTAAGCAATCCGGTTTCGGTGGTCAAACCAAGCCCGTTTTCCACAAGAAAGCCAAGACTACCAAGAAGGTTGTGTTGAGATTGGAATGTGTTGTCTGCAAGACCAAGGCTCAACTCTCATTGAAGAGATGTAAGCACTTTGAATTGGGAGGTGACAAGAAGCAAAAGGGTCAAGCTTTACAATTTTAA	151		151	GGTGGTCAAACCAAG	VALID	CCC	Proline
meyerozyma_guilliermondii_g005673.m1	4236	ATGCAATTCTCCAAGATTATCGGTTCCTTAGTGTCGGCTTCGTTGATAACAAATGTGATGGGTGCTCCACATGAAGCTAAAAAACGTGATGATGATGACGATCCTGTGGTGGTTCACATTAAGACTACGGTGCAAAACACACAAACAAATGTCCATACCGTGGAAGGAAAGGTGCAAACTAAAACAAATTGGATTGTTGATACTTCAACTGCCACTGTTACCAGTTATACAGCCACCGTCACTTCCACAGTTTTTGGAACTCCTTATACGTTTGTTACGGTTGCTACTACTCCGATTGATGTGTCCAGTTTGTCTTTGCCAACTGAAATTGCTGCGCAAACCGAAATTGAAACTACTCAAGCAAAGGCTGCAACCACACCCACAACGGTCCCAACTACA…	ATGCAATTCTCCAAGATTATCGGTTCCTTAGTGTCGGCTTCGTTGATAACAAATGTGATGGGTGCTCCACATGAAGCTAAAAAACGTGATGATGATGACGATCCTGTGGTGGTTCACATTAAGACTACGGTGCAAAACACACAAACAAATGTCCATACCGTGGAAGGAAAGGTGCAAACTAAAACAAATTGGATTGTTGATACTTCAACTGCCACTGTTACCAGTTATACAGCCACCGTCACTTCCACAGTTTTTGGAACTCCTTATACGTTTGTTACGGTTGCTACTACTCCGATTGATGTGTCCAGTTTGTCTTTGCCAACTGAAATTGCTGCGCAAACCGAAATTGAAACTACTCAAGCAAAGGCTGCAACCACACCCACAACGGTCCCAACTACA…	853		853	GGTGGTCAAACCAAG	VALID	CCC	Proline
yHMPu5000035329_candida_saitoana_180604.haplomerger2_g002421.m1	4236	ATGGTGAACGTTCCAAAAACTAGAAAAACCTATTGTAAAGGTAAGGCTTGTAGAAAACATACCCAACACAAAGTCACTCAATACAAAGCCGGTAAAGCTTCTTTATTCGCTCAAGGTAAGAGAAGATATGACAGAAAACAATCCGGTTTCGGTGGTCAAACCAAACCAGTTTTCCACAAGAAAGCTAAAACTACCAAAAAAGTTGTTTTAAGATTAGAATGTGTCGTCTGTAAAACTAAAGCTCAATTATCTTTAAAGAGATGTAAACATTTCGAATTAGGTGGTGACAAAAAACAAAAAGGTCAAGCTTTACAATTTTAA	ATGGTGAACGTTCCAAAAACTAGAAAAACCTATTGTAAAGGTAAGGCTTGTAGAAAACATACCCAACACAAAGTCACTCAATACAAAGCCGGTAAAGCTTCTTTATTCGCTCAAGGTAAGAGAAGATATGACAGAAAACAATCCGGTTTCGGTGGTCAAACCAAACCAGTTTTCCACAAGAAAGCTAAAACTACCAAAAAAGTTGTTTTAAGATTAGAATGTGTCGTCTGTAAAACTAAAGCTCAATTATCTTTAAAGAGATGTAAACATTTCGAATTAGGTGGTGACAAAAAACAAAAAGGTCAAGCTTTACAATTTTAA	151		151	GGTGGTCAAACCAAA	VALID	CCA	Proline
yHMPu5000035043_babjeviella_inositovora_180604_g001012.m1	4236	ATGGAAAGAGCTGCCCCTGTTACCGATGACGCAAGTAAGGATAACAGTAAAAGCAAAGCTGTTTTACTTGGTGAAGAAATCATTGCTGCACAGTGGTACGTGTATGTGTCGCAGGTTAACGTTCCAAAGACCAGAAAGACCTACTGTAAGGGTAAGGCTTGTCGCAAGCACACCCAGCACAAAGTTACTCAATACAAGGCTGGTAAGGCTTCCTTGTTCGCCCAAGGTAAGAGAAGATATGACCGTAAGCAATCTGGTTTCGGTGGTCAGACCAAGCCAGTTTTCCACAAGAAGGCTAAGACTACCAAGAAGGTTGTCTTGAGATTGGAATGTGTTGTCTGCAAGACCAAGGCTCAATTGTCCTTGAAGAGATGTAAGCACTTTGAGTTGGGTGGTGAC…	ATGGAAAGAGCTGCCCCTGTTACCGATGACGCAAGTAAGGATAACAGTAAAAGCAAAGCTGTTTTACTTGGTGAAGAAATCATTGCTGCACAGTGGTACGTGTATGTGTCGCAGGTTAACGTTCCAAAGACCAGAAAGACCTACTGTAAGGGTAAGGCTTGTCGCAAGCACACCCAGCACAAAGTTACTCAATACAAGGCTGGTAAGGCTTCCTTGTTCGCCCAAGGTAAGAGAAGATATGACCGTAAGCAATCTGGTTTCGGTGGTCAGACCAAGCCAGTTTTCCACAAGAAGGCTAAGACTACCAAGAAGGTTGTCTTGAGATTGGAATGTGTTGTCTGCAAGACCAAGGCTCAATTGTCCTTGAAGAGATGTAAGCACTTTGAGTTGGGTGGTGAC…	#VALUE!	262	#VALUE!	#VALUE!	#VALUE!	#VALUE!	#VALUE!
yHMH26_Wickerhamomyces_sp_nov_plate34_DISCOVAR_g004993.m1	4236	ATGGTTAACGTTCCAAAAACCAGAAAAACCTACTGTAAAGGTAAGGAGTGTCGTAAACACACTCAACACAAAGTTACTCAATACAAAGCTGGTAAAGCTTCTTTGTTTGCTCAAGGTAAAAGACGTTATGACCGTAAACAATCTGGTTTCGGTGGTCAAACTAAACCAGTCTTTCACAAGAAAGCTAAAACTACCAAGAAAGTTGTTTTGCGTTTGGAATGTGTTGTTTGCAAAACCAAAGCTCAATTGTCTTTGAAACGTTGTAAGCACTTTGAATTGGGTGGTGACAAGAAACAAAAAGGTGCTGCACTACAATTCTAA	ATGGTTAACGTTCCAAAAACCAGAAAAACCTACTGTAAAGGTAAGGAGTGTCGTAAACACACTCAACACAAAGTTACTCAATACAAAGCTGGTAAAGCTTCTTTGTTTGCTCAAGGTAAAAGACGTTATGACCGTAAACAATCTGGTTTCGGTGGTCAAACTAAACCAGTCTTTCACAAGAAAGCTAAAACTACCAAGAAAGTTGTTTTGCGTTTGGAATGTGTTGTTTGCAAAACCAAAGCTCAATTGTCTTTGAAACGTTGTAAGCACTTTGAATTGGGTGGTGACAAGAAACAAAAAGGTGCTGCACTACAATTCTAA	151		151	GGTGGTCAAACTAAA	VALID	CCA	Proline
yHMH617_Wickerhamomyces_sp_nov_plate34_PLATANUS_g003233.m1	4236	ATGGTTAACGTTCCAAAAACCAGAAGAACCTACTGTAAAGGTAAGGAGTGTCGTAAACACACCCAACACAAAGTTACCCAATACAAAGCTGGTAAAGCTTCCTTATTTGCTCAAGGTAAACGTCGTTATGACCGTAAACAATCTGGTTACGGTGGTCAAACCAAACCAGTTTTCCACAAAAAGGCTAAAACTACCAAGAAAGTTGTCTTACGTTTGGAATGTGTTGTTTGCAAAACCAAAGCTCAATTATCATTGAAACGTTGTAAACATTTTGAATTAGGTGGTGACAAAAAACAAAAAGGTGCTGCTTTACAATTTTAA	ATGGTTAACGTTCCAAAAACCAGAAGAACCTACTGTAAAGGTAAGGAGTGTCGTAAACACACCCAACACAAAGTTACCCAATACAAAGCTGGTAAAGCTTCCTTATTTGCTCAAGGTAAACGTCGTTATGACCGTAAACAATCTGGTTACGGTGGTCAAACCAAACCAGTTTTCCACAAAAAGGCTAAAACTACCAAGAAAGTTGTCTTACGTTTGGAATGTGTTGTTTGCAAAACCAAAGCTCAATTATCATTGAAACGTTGTAAACATTTTGAATTAGGTGGTGACAAAAAACAAAAAGGTGCTGCTTTACAATTTTAA	151		151	GGTGGTCAAACCAAA	VALID	CCA	Proline
yHMPu5000037888_candida_quercuum_170210_g001864.m1	4236	ATGGTTAACGTTCCAAAAACTAGAAGAACCTACTGTAAAGGTAAAGAATGTCGTAAACACACTCAACACAAAGTTACCCAATACAAAGCTGGTAAAGCTTCTTTGTTTGCTCAAGGTAAACGTCGTTATGACCGTAAACAATCTGGTTACGGTGGTCAAACCAAACCAGTCTTCCACAAAAAGGCTAAAACTACCAAGAAAGTTGTCTTACGTTTGGAATGTGTTGTTTGCAAAACCAAAGCTCAATTGTCTTTAAAACGTTGTAAACATTTCGAACTAGGTGGTGACAAAAAACAAAAAGGTGCTGCTTTACAATTCTAA	ATGGTTAACGTTCCAAAAACTAGAAGAACCTACTGTAAAGGTAAAGAATGTCGTAAACACACTCAACACAAAGTTACCCAATACAAAGCTGGTAAAGCTTCTTTGTTTGCTCAAGGTAAACGTCGTTATGACCGTAAACAATCTGGTTACGGTGGTCAAACCAAACCAGTCTTCCACAAAAAGGCTAAAACTACCAAGAAAGTTGTCTTACGTTTGGAATGTGTTGTTTGCAAAACCAAAGCTCAATTGTCTTTAAAACGTTGTAAACATTTCGAACTAGGTGGTGACAAAAAACAAAAAGGTGCTGCTTTACAATTCTAA	151		151	GGTGGTCAAACCAAA	VALID	CCA	Proline
yHMPu5000038075_candida_ulmi_170912_g004411.m1	4236	ATGGTGAACGTTCCAAAAACCAGAAGAACCTACTGTAAAGGTAAAGAGTGCCGTAAACACACTCAACACAAAGTTACCCAATACAAAGCCGGTAAAGCTTCTTTATTCGCTCAAGGTAAACGTCGTTATGACCGTAAACAATCCGGTTACGGTGGTCAAACCAAACCAGTTTTCCACAAAAAAGCTAAAACTACCAAAAAAGTTGTTTTACGTTTGGAATGTGTTGTTTGCAAAACCAAAGCTCAATTATCTTTGAAACGTTGTAAACATTTTGAATTAGGTGGTGACAAAAAACAAAAAGGTGCTGCTTTACAATTTTAA	ATGGTGAACGTTCCAAAAACCAGAAGAACCTACTGTAAAGGTAAAGAGTGCCGTAAACACACTCAACACAAAGTTACCCAATACAAAGCCGGTAAAGCTTCTTTATTCGCTCAAGGTAAACGTCGTTATGACCGTAAACAATCCGGTTACGGTGGTCAAACCAAACCAGTTTTCCACAAAAAAGCTAAAACTACCAAAAAAGTTGTTTTACGTTTGGAATGTGTTGTTTGCAAAACCAAAGCTCAATTATCTTTGAAACGTTGTAAACATTTTGAATTAGGTGGTGACAAAAAACAAAAAGGTGCTGCTTTACAATTTTAA	151		151	GGTGGTCAAACCAAA	VALID	CCA	Proline
yHMPu5000038085_candida_sp_170912_g001166.m1	4236	ATGGTTAACGTTCCAAAAACCAGAAGAACCTACTGTAAAGGTAAGGAGTGTCGTAAACACACCCAACACAAAGTTACCCAATACAAAGCTGGTAAAGCTTCTTTGTTTGCTCAAGGTAAACGTCGTTATGACCGTAAACAATCCGGTTACGGTGGTCAAACCAAACCAGTTTTCCACAAAAAGGCTAAAACTACCAAGAAAGTTGTCTTACGTTTGGAATGTGTTGTTTGCAAAACCAAAGCTCAATTATCTTTGAAACGTTGTAAACATTTTGAATTAGGTGGTGACAAAAAACAAAAAGGTGCTGCTTTACAATTTTAA	ATGGTTAACGTTCCAAAAACCAGAAGAACCTACTGTAAAGGTAAGGAGTGTCGTAAACACACCCAACACAAAGTTACCCAATACAAAGCTGGTAAAGCTTCTTTGTTTGCTCAAGGTAAACGTCGTTATGACCGTAAACAATCCGGTTACGGTGGTCAAACCAAACCAGTTTTCCACAAAAAGGCTAAAACTACCAAGAAAGTTGTCTTACGTTTGGAATGTGTTGTTTGCAAAACCAAAGCTCAATTATCTTTGAAACGTTGTAAACATTTTGAATTAGGTGGTGACAAAAAACAAAAAGGTGCTGCTTTACAATTTTAA	151		151	GGTGGTCAAACCAAA	VALID	CCA	Proline
yHMPu5000038386_candida_jianshihensis_170713.haplomerger2_g003531.m1	4236	ATGGTTAACGTTCCAAAAACCAGAAAAACCTACTGTAAAGGTAAAGAGTGTCGTAAACACACCCAACACAAAGTTACCCAATACAAAGCTGGTAAAGCTTCTTTATTCGCTCAAGGTAAACGTCGTTATGACCGTAAACAATCCGGTTACGGTGGTCAAACCAAACCAGTCTTCCACAAAAAAGCTAAAACTACCAAAAAAGTTGTTTTACGTTTAGAATGTGTTGTCTGCAAAACCAAAGCTCAATTATCCTTGAAACGTTGTAAACACTTTGAATTAGGTGGTGACAAAAAACAAAAAGGTGCTGCTTTACAATTCTAA	ATGGTTAACGTTCCAAAAACCAGAAAAACCTACTGTAAAGGTAAAGAGTGTCGTAAACACACCCAACACAAAGTTACCCAATACAAAGCTGGTAAAGCTTCTTTATTCGCTCAAGGTAAACGTCGTTATGACCGTAAACAATCCGGTTACGGTGGTCAAACCAAACCAGTCTTCCACAAAAAAGCTAAAACTACCAAAAAAGTTGTTTTACGTTTAGAATGTGTTGTCTGCAAAACCAAAGCTCAATTATCCTTGAAACGTTGTAAACACTTTGAATTAGGTGGTGACAAAAAACAAAAAGGTGCTGCTTTACAATTCTAA	151		151	GGTGGTCAAACCAAA	VALID	CCA	Proline
yHMPu5000035037_candida_montana_160519_g003984.m1	4236	ATGGTTAACGTTCCAAAAACCAGAAAAACCTACTGTAAAGGTAAAGAATGTCGTAAGCACACTCAACACAAAGTTACCCAATACAAAGCTGGTAAAGCCTCATTATTTGCCCAAGGTAAAAGACGTTATGACCGTAAACAATCCGGTTACGGTGGTCAAACCAAACCAGTTTTCCACAAAAAGGCTAAAACTACCAAAAAAGTTGTCTTACGTTTGGAATGTGTTGTTTGCAAAACCAGAGCTCAATTATCATTGAAACGTTGTAAACATTTCGAATTAGGTGGTGACAAAAAACAAAAAGGTGCTGCTTTACAATTCTAG	ATGGTTAACGTTCCAAAAACCAGAAAAACCTACTGTAAAGGTAAAGAATGTCGTAAGCACACTCAACACAAAGTTACCCAATACAAAGCTGGTAAAGCCTCATTATTTGCCCAAGGTAAAAGACGTTATGACCGTAAACAATCCGGTTACGGTGGTCAAACCAAACCAGTTTTCCACAAAAAGGCTAAAACTACCAAAAAAGTTGTCTTACGTTTGGAATGTGTTGTTTGCAAAACCAGAGCTCAATTATCATTGAAACGTTGTAAACATTTCGAATTAGGTGGTGACAAAAAACAAAAAGGTGCTGCTTTACAATTCTAG	151		151	GGTGGTCAAACCAAA	VALID	CCA	Proline
yHMPu5000038398_barnettozyma_siamensis_170713_g004239.m1	4236	ATGGTTAACGTTCCAAAAACCAGAAAAACCTACTGTAAAGGTAAAGAATGTCGTAAACACACCCAACACAAAGTTACCCAATACAAAGCTGGTAAAGCCTCCTTATTTGCCCAAGGTAAAAGACGTTATGACCGTAAACAAGCCGGTTACGGTGGTCAAACCAAACCAGTCTTCCACAAAAAGGCTAAAACTACCAAGAAAGTTGTTTTACGTTTAGAATGTGTTGTTTGCAAAACCAGAGCTCAATTATCATTGAAACGTTGTAAACACTTCGAATTAGGTGGTGACAAAAAACAAAAAGGTGCTGCTTTACAATTCTAG	ATGGTTAACGTTCCAAAAACCAGAAAAACCTACTGTAAAGGTAAAGAATGTCGTAAACACACCCAACACAAAGTTACCCAATACAAAGCTGGTAAAGCCTCCTTATTTGCCCAAGGTAAAAGACGTTATGACCGTAAACAAGCCGGTTACGGTGGTCAAACCAAACCAGTCTTCCACAAAAAGGCTAAAACTACCAAGAAAGTTGTTTTACGTTTAGAATGTGTTGTTTGCAAAACCAGAGCTCAATTATCATTGAAACGTTGTAAACACTTCGAATTAGGTGGTGACAAAAAACAAAAAGGTGCTGCTTTACAATTCTAG	151		151	GGTGGTCAAACCAAA	VALID	CCA	Proline
yHMPu5000026157_candida_sp_170713_g004167.m1	4236	ATGGTTAACGTTCCAAAAACTAGAAGAACCTACTGTAAAGGTAAAGAATGTCGTAAACACACTCAACACAAAGTTACCCAATACAAAGCCGGTAAAGCTTCTTTATTCGCTCAAGGTAAACGTCGTTATGACCGTAAACAATCCGGTTACGGTGGTCAAACCAAACCAGTCTTCCACAAAAAAGCTAAAACTACCAAAAAAGTTGTTTTACGTTTAGAATGTGTTGTCTGTAAAACCAAAGCTCAATTAGCTTTAAAACGTTGTAAACATTTTGAATTAGGTGGTGACAAAAAACAAAAAGGTGCTGCTCTACAATTTTAA	ATGGTTAACGTTCCAAAAACTAGAAGAACCTACTGTAAAGGTAAAGAATGTCGTAAACACACTCAACACAAAGTTACCCAATACAAAGCCGGTAAAGCTTCTTTATTCGCTCAAGGTAAACGTCGTTATGACCGTAAACAATCCGGTTACGGTGGTCAAACCAAACCAGTCTTCCACAAAAAAGCTAAAACTACCAAAAAAGTTGTTTTACGTTTAGAATGTGTTGTCTGTAAAACCAAAGCTCAATTAGCTTTAAAACGTTGTAAACATTTTGAATTAGGTGGTGACAAAAAACAAAAAGGTGCTGCTCTACAATTTTAA	151		151	GGTGGTCAAACCAAA	VALID	CCA	Proline
yHMPu5000035265_Candida_sp_SPADES_g005886.m1	4236	ATGGTTAACGTTCCAAAAACTAGAAGAACCTACTGTAAAGGTAAAGAATGTCGTAAACACACTCAACACAAAGTTACCCAATACAAAGCTGGTAAAGCTTCTTTATTTGCTCAAGGTAAACGTCGTTATGACCGTAAACAATCCGGTTACGGTGGTCAAACCAAACCAGTTTTCCATAAAAAAGCTAAAACTACCAAAAAAGTTGTCTTACGTTTAGAATGTGTTGTTTGCAAAACCAAAGCTCAATTAGCTTTAAAACGTTGTAAACATTTTGAATTAGGTGGTGACAAAAAACAAAAAGGTGCTGCTTTACAATTTTAA	ATGGTTAACGTTCCAAAAACTAGAAGAACCTACTGTAAAGGTAAAGAATGTCGTAAACACACTCAACACAAAGTTACCCAATACAAAGCTGGTAAAGCTTCTTTATTTGCTCAAGGTAAACGTCGTTATGACCGTAAACAATCCGGTTACGGTGGTCAAACCAAACCAGTTTTCCATAAAAAAGCTAAAACTACCAAAAAAGTTGTCTTACGTTTAGAATGTGTTGTTTGCAAAACCAAAGCTCAATTAGCTTTAAAACGTTGTAAACATTTTGAATTAGGTGGTGACAAAAAACAAAAAGGTGCTGCTTTACAATTTTAA	151		151	GGTGGTCAAACCAAA	VALID	CCA	Proline
yHMPu5000035272_wickerhamomyces_bisporus_170307_g001651.m1	4236	ATGGTTAACGTTCCAAAAACCAGAAGAACCTACTGTAAAGGTAAAGAATGTCGTAAACACACTCAACACAAAGTTACCCAATACAAAGCTGGTAAAGCTTCTTTATTCGCTCAAGGTAAACGTCGTTATGACCGTAAACAATCCGGTTACGGTGGTCAAACCAAACCAGTTTTCCACAAAAAGGCTAAAACTACCAAAAAAGTTGTTTTACGTTTGGAATGTGTTGTTTGCAAAACCAAAGCTCAATTAGCTTTGAAACGTTGTAAACATTTTGAATTAGGTGGTGACAAAAAACAAAAAGGTGCTGCTTTACAATTTTAA	ATGGTTAACGTTCCAAAAACCAGAAGAACCTACTGTAAAGGTAAAGAATGTCGTAAACACACTCAACACAAAGTTACCCAATACAAAGCTGGTAAAGCTTCTTTATTCGCTCAAGGTAAACGTCGTTATGACCGTAAACAATCCGGTTACGGTGGTCAAACCAAACCAGTTTTCCACAAAAAGGCTAAAACTACCAAAAAAGTTGTTTTACGTTTGGAATGTGTTGTTTGCAAAACCAAAGCTCAATTAGCTTTGAAACGTTGTAAACATTTTGAATTAGGTGGTGACAAAAAACAAAAAGGTGCTGCTTTACAATTTTAA	151		151	GGTGGTCAAACCAAA	VALID	CCA	Proline
yHMPu5000035274_wickerhamomyces_alni_170307_g004825.m1	4236	ATGGTTAACGTTCCAAAAACCAGAAGAACCTACTGCAAAGGTAAAGAGTGTCGTAAACACACCCAACACAAAGTTACCCAATACAAAGCCGGTAAAGCTTCTTTATTCGCTCAAGGTAAACGTCGTTATGACCGTAAACAATCCGGTTACGGTGGTCAAACCAAACCAGTTTTCCACAAAAAGGCTAAAACTACCAAAAAAGTTGTTTTACGTTTGGAATGTGTTGTTTGCAAAACCAAAGCTCAATTAGCTTTGAAACGTTGTAAACATTTTGAACTAGGTGGTGACAAAAAACAAAAAGGTGCTGCTTTACAATTTTAA	ATGGTTAACGTTCCAAAAACCAGAAGAACCTACTGCAAAGGTAAAGAGTGTCGTAAACACACCCAACACAAAGTTACCCAATACAAAGCCGGTAAAGCTTCTTTATTCGCTCAAGGTAAACGTCGTTATGACCGTAAACAATCCGGTTACGGTGGTCAAACCAAACCAGTTTTCCACAAAAAGGCTAAAACTACCAAAAAAGTTGTTTTACGTTTGGAATGTGTTGTTTGCAAAACCAAAGCTCAATTAGCTTTGAAACGTTGTAAACATTTTGAACTAGGTGGTGACAAAAAACAAAAAGGTGCTGCTTTACAATTTTAA	151		151	GGTGGTCAAACCAAA	VALID	CCA	Proline
yHMPu5000035286_candida_azyma_170307_g000841.m1	4236	ATGGTTAACGTTCCAAAAACCAGAAGAACCTACTGTAAAGGTAAAGAATGTCGTAAGCACACTCAACACAAAGTTACCCAATACAAAGCTGGTAAAGCTTCTTTATTTGCTCAAGGTAAACGTCGTTATGACCGTAAACAATCCGGTTACGGTGGTCAAACCAAACCAGTCTTCCACAAAAAGGCTAAAACTACCAAAAAAGTTGTTTTACGTTTAGAATGTGTTGTCTGCAAAACCAAAGCTCAATTAGCCTTGAAACGTTGTAAACATTTTGAATTAGGTGGTGACAAAAAACAAAAAGGTGCTGCTTTACAATTTTAA	ATGGTTAACGTTCCAAAAACCAGAAGAACCTACTGTAAAGGTAAAGAATGTCGTAAGCACACTCAACACAAAGTTACCCAATACAAAGCTGGTAAAGCTTCTTTATTTGCTCAAGGTAAACGTCGTTATGACCGTAAACAATCCGGTTACGGTGGTCAAACCAAACCAGTCTTCCACAAAAAGGCTAAAACTACCAAAAAAGTTGTTTTACGTTTAGAATGTGTTGTCTGCAAAACCAAAGCTCAATTAGCCTTGAAACGTTGTAAACATTTTGAATTAGGTGGTGACAAAAAACAAAAAGGTGCTGCTTTACAATTTTAA	151		151	GGTGGTCAAACCAAA	VALID	CCA	Proline
yHMPu5000035639_wickerhamomyces_canadensis_160613_g000988.m1	4236	ATGGTTAACGTTCCAAAAACCAGAAGAACCTACTGTAAAGGTAAAGAATGTCGTAAGCACACTCAACACAAAGTTACCCAATACAAAGCTGGTAAAGCTTCTTTATTTGCTCAAGGTAAACGTCGTTATGACCGTAAACAATCAGGTTACGGTGGTCAAACCAAACCAGTCTTCCACAAAAAGGCTAAAACTACCAAAAAAGTTGTTTTACGTTTAGAATGTGTTGTCTGCAAAACCAAAGCTCAATTAGCCTTGAAACGTTGTAAACATTTTGAATTAGGTGGTGACAAAAAACAAAAAGGTGCTGCTTTACAATTTTAA	ATGGTTAACGTTCCAAAAACCAGAAGAACCTACTGTAAAGGTAAAGAATGTCGTAAGCACACTCAACACAAAGTTACCCAATACAAAGCTGGTAAAGCTTCTTTATTTGCTCAAGGTAAACGTCGTTATGACCGTAAACAATCAGGTTACGGTGGTCAAACCAAACCAGTCTTCCACAAAAAGGCTAAAACTACCAAAAAAGTTGTTTTACGTTTAGAATGTGTTGTCTGCAAAACCAAAGCTCAATTAGCCTTGAAACGTTGTAAACATTTTGAATTAGGTGGTGACAAAAAACAAAAAGGTGCTGCTTTACAATTTTAA	151		151	GGTGGTCAAACCAAA	VALID	CCA	Proline
candida_psychrophila_g003935.m1	4236	ATGGTTAACGTTCCAAAGACTAGAAGGACTTACTGTAAGGGTAAGGAATGTCGTAAGCATACTCAACACAAGGTTACTCAATACAAGGCTGGTAAGGCTTCCTTATTCGCTCAAGGTAAGAGAAGATATGACCGTAAGCAAAAGGGTTATGGTGGTCAAACCAAACCAGTTTTCCACAAAAAGGCTAAGACTACCAAGAAGGTTGTCTTAAGATTGGAATGTGTCGTCTGTAAGACGAAGGCTCAATTAGCTTTAAAGAGATGTAAGCACTTCGAATTAGGTGGTGACAAGAAGCAAAAGGGTCAAGCTTTACAATTTTAA	ATGGTTAACGTTCCAAAGACTAGAAGGACTTACTGTAAGGGTAAGGAATGTCGTAAGCATACTCAACACAAGGTTACTCAATACAAGGCTGGTAAGGCTTCCTTATTCGCTCAAGGTAAGAGAAGATATGACCGTAAGCAAAAGGGTTATGGTGGTCAAACCAAACCAGTTTTCCACAAAAAGGCTAAGACTACCAAGAAGGTTGTCTTAAGATTGGAATGTGTCGTCTGTAAGACGAAGGCTCAATTAGCTTTAAAGAGATGTAAGCACTTCGAATTAGGTGGTGACAAGAAGCAAAAGGGTCAAGCTTTACAATTTTAA	151		151	GGTGGTCAAACCAAA	VALID	CCA	Proline
yHMPu5000035717_candida_orthopsilosis_180604.haplomerger2_g003206.m1	4236	ATGGTGAACGTTCCAAAAACCAGAAGAACCTACTGTAAAGGTAAAGAATGTCGTAAACACACCCAACACAAGGTCACTCAATACAAAGCTGGTAAAGCTTCATTGTTTGCCCAAGGTAAGAGAAGATATGACAGAAAACAAAAGGGTTATGGTGGTCAAACCAAGCCAGTTTTCCACAAAAAGGCAAAGACTACCAAGAAAGTTGTTTTGAGATTGGAATGTGTTGTCTGTAAGACCAAGGCTCAATTGGCTTTGAAGAGATGTAAACATTTCGAATTGGGTGGTGACAAGAAACAAAAGGGTCAAGCTTTACAATTCTAA	ATGGTGAACGTTCCAAAAACCAGAAGAACCTACTGTAAAGGTAAAGAATGTCGTAAACACACCCAACACAAGGTCACTCAATACAAAGCTGGTAAAGCTTCATTGTTTGCCCAAGGTAAGAGAAGATATGACAGAAAACAAAAGGGTTATGGTGGTCAAACCAAGCCAGTTTTCCACAAAAAGGCAAAGACTACCAAGAAAGTTGTTTTGAGATTGGAATGTGTTGTCTGTAAGACCAAGGCTCAATTGGCTTTGAAGAGATGTAAACATTTCGAATTGGGTGGTGACAAGAAACAAAAGGGTCAAGCTTTACAATTCTAA	151		151	GGTGGTCAAACCAAG	VALID	CCA	Proline
yHMPu5000037873_debaryomyces_udenii_180604_g004391.m1	4236	ATGGTTAACGTTCCAAAGACTAGAAGGACTTACTGTAAGGGTAAAGAATGTCGTAAGCACACCCAACACAAAGTTACTCAATACAAGGCCGGTAAAGCCTCGTTATTTGCCCAAGGTAAAAGAAGATATGACCGTAAACAAAAGGGTTACGGTGGTCAAACCAAGCCAGTTTTCCATAAGAAAGCCAAGACTACCAAGAAGGTTGTTTTGAGATTGGAATGTGTTGTTTGCAAGACCAAGGCCCAATTAGCCTTGAAGAGATGTAAGCACTTCGAGTTAGGTGGTGACAAGAAACAAAAGGGTCAAGCCTTACAATTTTAA	ATGGTTAACGTTCCAAAGACTAGAAGGACTTACTGTAAGGGTAAAGAATGTCGTAAGCACACCCAACACAAAGTTACTCAATACAAGGCCGGTAAAGCCTCGTTATTTGCCCAAGGTAAAAGAAGATATGACCGTAAACAAAAGGGTTACGGTGGTCAAACCAAGCCAGTTTTCCATAAGAAAGCCAAGACTACCAAGAAGGTTGTTTTGAGATTGGAATGTGTTGTTTGCAAGACCAAGGCCCAATTAGCCTTGAAGAGATGTAAGCACTTCGAGTTAGGTGGTGACAAGAAACAAAAGGGTCAAGCCTTACAATTTTAA	151		151	GGTGGTCAAACCAAG	VALID	CCA	Proline
yHMPu5000041678_debaryomyces_prosopidis_170307_g005006.m1	4236	ATGGTTAACGTTCCAAAGACTAGAAGGACTTACTGTAAGGGTAAGGAATGTCGTAAGCATACTCAACACAAGGTTACCCAATACAAGGCCGGTAAAGCCTCTTTATTTGCTCAAGGTAAGAGAAGATATGACCGTAAGCAAAAGGGTTACGGTGGTCAAACCAAGCCAGTTTTCCACAAAAAGGCTAAGACTACCAAGAAGGTTGTTTTAAGATTAGAATGTGTCGTCTGTAAGACCAAGGCTCAATTAGCTTTAAAGAGATGTAAGCACTTCGAATTAGGTGGTGACAAGAAGCAAAAGGGTCAAGCTTTACAATTTTAA	ATGGTTAACGTTCCAAAGACTAGAAGGACTTACTGTAAGGGTAAGGAATGTCGTAAGCATACTCAACACAAGGTTACCCAATACAAGGCCGGTAAAGCCTCTTTATTTGCTCAAGGTAAGAGAAGATATGACCGTAAGCAAAAGGGTTACGGTGGTCAAACCAAGCCAGTTTTCCACAAAAAGGCTAAGACTACCAAGAAGGTTGTTTTAAGATTAGAATGTGTCGTCTGTAAGACCAAGGCTCAATTAGCTTTAAAGAGATGTAAGCACTTCGAATTAGGTGGTGACAAGAAGCAAAAGGGTCAAGCTTTACAATTTTAA	151		151	GGTGGTCAAACCAAG	VALID	CCA	Proline
yHMPu5000041824_debaryomyces_subglobosus_160928_g003485.m1	4236	ATGGTTAACGTTCCAAAGACTAGAAGGACTTACTGTAAGGGTAAGGAATGTCGTAAGCATACTCAACACAAGGTTACCCAATACAAGGCCGGTAAAGCCTCTTTATTCGCTCAAGGTAAGAGAAGATATGACCGTAAGCAAAAGGGTTACGGTGGTCAAACCAAGCCAGTTTTCCACAAAAAGGCTAAGACTACCAAGAAGGTTGTTTTAAGATTAGAATGTGTCGTCTGTAAGACCAAGGCTCAATTAGCTTTAAAGAGATGTAAGCACTTCGAATTAGGTGGTGACAAGAAGCAAAAGGGTCAAGCTTTACAATTTTAA	ATGGTTAACGTTCCAAAGACTAGAAGGACTTACTGTAAGGGTAAGGAATGTCGTAAGCATACTCAACACAAGGTTACCCAATACAAGGCCGGTAAAGCCTCTTTATTCGCTCAAGGTAAGAGAAGATATGACCGTAAGCAAAAGGGTTACGGTGGTCAAACCAAGCCAGTTTTCCACAAAAAGGCTAAGACTACCAAGAAGGTTGTTTTAAGATTAGAATGTGTCGTCTGTAAGACCAAGGCTCAATTAGCTTTAAAGAGATGTAAGCACTTCGAATTAGGTGGTGACAAGAAGCAAAAGGGTCAAGCTTTACAATTTTAA	151		151	GGTGGTCAAACCAAG	VALID	CCA	Proline
yHMPu5000041829_debaryomyces_fabryi_180604_g003827.m1	4236	ATGGTTAACGTTCCAAAGACTAGAAGGACTTACTGTAAGGGTAAGGAATGTCGTAAACATACTCAACACAAGGTTACCCAATACAAGGCCGGTAAAGCCTCTTTATTCGCTCAAGGTAAGAGAAGATATGACCGTAAGCAAAAGGGTTACGGTGGTCAAACCAAGCCAGTTTTCCACAAAAAAGCTAAGACTACCAAGAAGGTTGTTTTAAGATTAGAATGTGTCGTCTGTAAGACCAAGGCTCAATTAGCTTTAAAGAGATGTAAGCACTTCGAATTAGGTGGTGACAAGAAGCAAAAGGGTCAAGCTTTACAATTTTAA	ATGGTTAACGTTCCAAAGACTAGAAGGACTTACTGTAAGGGTAAGGAATGTCGTAAACATACTCAACACAAGGTTACCCAATACAAGGCCGGTAAAGCCTCTTTATTCGCTCAAGGTAAGAGAAGATATGACCGTAAGCAAAAGGGTTACGGTGGTCAAACCAAGCCAGTTTTCCACAAAAAAGCTAAGACTACCAAGAAGGTTGTTTTAAGATTAGAATGTGTCGTCTGTAAGACCAAGGCTCAATTAGCTTTAAAGAGATGTAAGCACTTCGAATTAGGTGGTGACAAGAAGCAAAAGGGTCAAGCTTTACAATTTTAA	151		151	GGTGGTCAAACCAAG	VALID	CCA	Proline
yHMPu5000041841_debaryomyces_coudertii_170713_g003175.m1	4236	ATGGTTAACGTTCCAAAGACTAGAAGGACTTACTGTAAGGGTAAGGAATGTCGTAAGCATACTCAACACAAGGTTACCCAATATAAGGCCGGTAAAGCCTCCTTATTCGCCCAAGGTAAGAGAAGATATGACCGTAAGCAAAAGGGTTACGGTGGTCAAACCAAGCCAGTTTTCCACAAAAAGGCTAAGACTACCAAGAAGGTTGTCTTAAGATTGGAATGTGTCGTCTGTAAGACCAAGGCTCAATTAGCTTTAAAGAGATGTAAGCACTTCGAATTAGGTGGTGACAAGAAGCAAAAGGGTCAAGCTTTACAATTTTAA	ATGGTTAACGTTCCAAAGACTAGAAGGACTTACTGTAAGGGTAAGGAATGTCGTAAGCATACTCAACACAAGGTTACCCAATATAAGGCCGGTAAAGCCTCCTTATTCGCCCAAGGTAAGAGAAGATATGACCGTAAGCAAAAGGGTTACGGTGGTCAAACCAAGCCAGTTTTCCACAAAAAGGCTAAGACTACCAAGAAGGTTGTCTTAAGATTGGAATGTGTCGTCTGTAAGACCAAGGCTCAATTAGCTTTAAAGAGATGTAAGCACTTCGAATTAGGTGGTGACAAGAAGCAAAAGGGTCAAGCTTTACAATTTTAA	151		151	GGTGGTCAAACCAAG	VALID	CCA	Proline
yHMPu5000038357_candida_theae_180604.haplomerger2_g004850.m1	4236	ATGTATACTCTTTTAGTGAACGTTCCAAAAACCAGAAGAACCTACTGTAAAGGTAAAGAATGTCGTAAACACACCCAGCACAAGGTCACCCAATACAAAGCTGGTAAAGCTTCATTGTTTGCCCAAGGTAAGAGAAGATATGACAGGAAACAAAAGGGTTACGGTGGTCAAACCAAGCCAGTTTTCCACAAAAAGGCCAAGACCACCAAGAAGGTTGTGTTGAGATTGGAATGTGTTGTCTGCAAGACCAAGGCTCAATTGGCTTTGAAGAGATGTAAGCATTTCGAATTGGGTGGTGACAAGAAACAAAAAGGTCAAGCTTTGCAATTCTAA	ATGTATACTCTTTTAGTGAACGTTCCAAAAACCAGAAGAACCTACTGTAAAGGTAAAGAATGTCGTAAACACACCCAGCACAAGGTCACCCAATACAAAGCTGGTAAAGCTTCATTGTTTGCCCAAGGTAAGAGAAGATATGACAGGAAACAAAAGGGTTACGGTGGTCAAACCAAGCCAGTTTTCCACAAAAAGGCCAAGACCACCAAGAAGGTTGTGTTGAGATTGGAATGTGTTGTCTGCAAGACCAAGGCTCAATTGGCTTTGAAGAGATGTAAGCATTTCGAATTGGGTGGTGACAAGAAACAAAAAGGTCAAGCTTTGCAATTCTAA	163		163	GGTGGTCAAACCAAG	VALID	CCA	Proline
yHMPu5000037240_candida_sp_210210_g000731.m1	4236	ATGGATAAGCCATTTCTTTTAAATGATCACGGACCGGATGAAGATGATTTTGATTTCAGTATAATTACTAACTATATTACTTTTTTAGTGAACGTTCCAAAAACCAGAAGAACCTACTGTAAAGGTAAAGAATGCCGTAAACACACTCAACACAAGGTCACCCAATACAAGGCTGGTAAGGCTTCTTTGTTTGCCCAAGGTAAGAGAAGATATGACAGAAAACAAAAGGGTTACGGTGGTCAAACCAAGCCAGTCTTCCACAAAAAGGCCAAGACCACCAAGAAAGTTGTTTTGAGATTGGAATGTGTTGTCTGTAAGACCAAGGCTCAATTAGCTTTGAAGAGATGTAAACATTTCGAATTGGGTGGTGACAAGAAACAAAAGGGTCAAGCTTTACAA…	ATGGATAAGCCATTTCTTTTAAATGATCACGGACCGGATGAAGATGATTTTGATTTCAGTATAATTACTAACTATATTACTTTTTTAGTGAACGTTCCAAAAACCAGAAGAACCTACTGTAAAGGTAAAGAATGCCGTAAACACACTCAACACAAGGTCACCCAATACAAGGCTGGTAAGGCTTCTTTGTTTGCCCAAGGTAAGAGAAGATATGACAGAAAACAAAAGGGTTACGGTGGTCAAACCAAGCCAGTCTTCCACAAAAAGGCCAAGACCACCAAGAAAGTTGTTTTGAGATTGGAATGTGTTGTCTGTAAGACCAAGGCTCAATTAGCTTTGAAGAGATGTAAACATTTCGAATTGGGTGGTGACAAGAAACAAAAGGGTCAAGCTTTACAA…	235		235	GGTGGTCAAACCAAG	VALID	CCA	Proline
yHMPu5000041713_debaryomyces_maramus_170307_g000379.m1	4236	ATGGTTAACGTTCCAAAGACTAGAAGGACCTACTGTAAAGGTAGAGAATGTCGTAAGCACACTCAACACAAGGTTACCCAATACAAGGCCGGTAAAGCCTCCTTGTTCGCCCAAGGTAAGAGAAGATATGACCGTAAGCAAAAGGGTTACGGTGGTCAAACCAAGCCAGTTTTCCACAAGAAAGCTAAGACTACCAAGAAGGTTGTCTTAAGATTAGAATGTGTTGTTTGCAAGACCAAGGCCCAATTAGCCTTGAAGAGATGTAAGCACTTCGAATTAGGTGGTGACAAGAAGCAAAAGGGTCAAGCTTTACAATTTTAA	ATGGTTAACGTTCCAAAGACTAGAAGGACCTACTGTAAAGGTAGAGAATGTCGTAAGCACACTCAACACAAGGTTACCCAATACAAGGCCGGTAAAGCCTCCTTGTTCGCCCAAGGTAAGAGAAGATATGACCGTAAGCAAAAGGGTTACGGTGGTCAAACCAAGCCAGTTTTCCACAAGAAAGCTAAGACTACCAAGAAGGTTGTCTTAAGATTAGAATGTGTTGTTTGCAAGACCAAGGCCCAATTAGCCTTGAAGAGATGTAAGCACTTCGAATTAGGTGGTGACAAGAAGCAAAAGGGTCAAGCTTTACAATTTTAA	151		151	GGTGGTCAAACCAAG	VALID	CCA	Proline
candida_parapsilosis_g003474.m1	4236	ATGTTAGTGCGCTTTTCAACAAAACAAAAAGAAAATCTAATTGTAAGAAAAATCCTCAGTTACTTTTTGAAAGCTTTCATAAAACCTTTATCGAAACAAGACAAGATGGTGAACGTTCCAAAAACCAGAAGAACCTACTGTAAAGGTAGAGAATGTCGTAAACACACCCAGCACAAGGTCACCCAATACAAAGCTGGTAAAGCTTCATTGTTTGCTCAAGGTAAGAGAAGATATGACAGAAAACAAAAGGGTTATGGTGGTCAAACCAAGCCAGTTTTCCACAAAAAGGCCAAGACCACCAAGAAGGTTGTTTTGAGATTGGAATGTGTTGTCTGTAAGACCAAGGCTCAATTGGCTTTGAAGAGATGTAAGCATTTCGAATTGGGTGGTGACAAGAAA…	ATGTTAGTGCGCTTTTCAACAAAACAAAAAGAAAATCTAATTGTAAGAAAAATCCTCAGTTACTTTTTGAAAGCTTTCATAAAACCTTTATCGAAACAAGACAAGATGGTGAACGTTCCAAAAACCAGAAGAACCTACTGTAAAGGTAGAGAATGTCGTAAACACACCCAGCACAAGGTCACCCAATACAAAGCTGGTAAAGCTTCATTGTTTGCTCAAGGTAAGAGAAGATATGACAGAAAACAAAAGGGTTATGGTGGTCAAACCAAGCCAGTTTTCCACAAAAAGGCCAAGACCACCAAGAAGGTTGTTTTGAGATTGGAATGTGTTGTCTGTAAGACCAAGGCTCAATTGGCTTTGAAGAGATGTAAGCATTTCGAATTGGGTGGTGACAAGAAA…	256		256	GGTGGTCAAACCAAG	VALID	CCA	Proline
yHMPu5000034995_candida_parapsilosis_170307_g002953.m1	4236	ATGTTAGTGCGCTTTTCAACAAAACAAAAAGAAAATCTAATTGTAAGAAAAATCCTCAGTTACTTTTTGAAAGCTTTCATAAAACCTTTATCGAAACAAGACAAGATGGTGAACGTTCCAAAAACCAGAAGAACCTACTGTAAAGGTAGAGAATGTCGTAAACACACCCAGCACAAGGTCACCCAATACAAAGCTGGTAAAGCTTCATTGTTTGCTCAAGGTAAGAGAAGATATGACAGAAAACAAAAGGGTTATGGTGGTCAAACCAAGCCAGTTTTCCACAAAAAGGCCAAGACCACCAAGAAGGTTGTTTTGAGATTGGAATGTGTTGTCTGTAAGACCAAGGCTCAATTGGCTTTGAAGAGATGTAAGCATTTCGAATTGGGTGGTGACAAGAAA…	ATGTTAGTGCGCTTTTCAACAAAACAAAAAGAAAATCTAATTGTAAGAAAAATCCTCAGTTACTTTTTGAAAGCTTTCATAAAACCTTTATCGAAACAAGACAAGATGGTGAACGTTCCAAAAACCAGAAGAACCTACTGTAAAGGTAGAGAATGTCGTAAACACACCCAGCACAAGGTCACCCAATACAAAGCTGGTAAAGCTTCATTGTTTGCTCAAGGTAAGAGAAGATATGACAGAAAACAAAAGGGTTATGGTGGTCAAACCAAGCCAGTTTTCCACAAAAAGGCCAAGACCACCAAGAAGGTTGTTTTGAGATTGGAATGTGTTGTCTGTAAGACCAAGGCTCAATTGGCTTTGAAGAGATGTAAGCATTTCGAATTGGGTGGTGACAAGAAA…	256		256	GGTGGTCAAACCAAG	VALID	CCA	Proline
yHMPu5000037243_lodderomyces_sp_210210_g000838.m1	4236	ATGGTTAACGTTCCAAAGACCAGAAAGACCTACTGTAAAGGTAAGGAATGTCGCAAACACACTCAACACAAGGTGACTCAATACAAGGCCGGTAAAGCCTCATTGTTTGCTCAAGGTAAGAGAAGATACGACAGGAAACAAAAGGGTTACGGTGGTCAAACCAAGCCAGTTTTCCACAAGAAGGCCAAGACCACCAAGAAGGTTGTTTTGAGATTGGAATGTGTCGTTTGCAAGACCAAGGCTCAATTGGCTTTGAAGAGATGTAAGCATTTCGAATTGGGTGGTGACAAGAAACAAAAAGGTCAAGCTTTGCAATTTTAA	ATGGTTAACGTTCCAAAGACCAGAAAGACCTACTGTAAAGGTAAGGAATGTCGCAAACACACTCAACACAAGGTGACTCAATACAAGGCCGGTAAAGCCTCATTGTTTGCTCAAGGTAAGAGAAGATACGACAGGAAACAAAAGGGTTACGGTGGTCAAACCAAGCCAGTTTTCCACAAGAAGGCCAAGACCACCAAGAAGGTTGTTTTGAGATTGGAATGTGTCGTTTGCAAGACCAAGGCTCAATTGGCTTTGAAGAGATGTAAGCATTTCGAATTGGGTGGTGACAAGAAACAAAAAGGTCAAGCTTTGCAATTTTAA	151		151	GGTGGTCAAACCAAG	VALID	CCA	Proline
yHMPu5000038371_candida_oxycetoniae_170713_g003893.m1	4236	ATGAAATTGGCCAAGTTACTCTCCGGTTTAGTTTCATTTCAATTGATATCCCATGTTTTTTCTGCTCCAACTTCAAATGACAATGACAAAAGGGATGACAATGTTGATTCTGATGATGATGTGGTTGTTGTAAAATTGAAAACTACAATTCAAACAACTCAAACAGATACCCACATTGTGCATGCCCCAACTTCAACTTATACTAGTTTGATAGTCAGCGAAAGCGTTGTAACAGTGACACATTACACTGCAACTGTTACTTCTACAATTTGGGGTACTCCTCATACGTATGTTACTGTTGCGACAACTCCTGTATCTGCAGCCGACGTTGAACCTATTCCACAAAACGAGATAACTGTATCCGTCAATGCAGGAGCAGTGCAACTGGCAAGCTCAAAT…	ATGAAATTGGCCAAGTTACTCTCCGGTTTAGTTTCATTTCAATTGATATCCCATGTTTTTTCTGCTCCAACTTCAAATGACAATGACAAAAGGGATGACAATGTTGATTCTGATGATGATGTGGTTGTTGTAAAATTGAAAACTACAATTCAAACAACTCAAACAGATACCCACATTGTGCATGCCCCAACTTCAACTTATACTAGTTTGATAGTCAGCGAAAGCGTTGTAACAGTGACACATTACACTGCAACTGTTACTTCTACAATTTGGGGTACTCCTCATACGTATGTTACTGTTGCGACAACTCCTGTATCTGCAGCCGACGTTGAACCTATTCCACAAAACGAGATAACTGTATCCGTCAATGCAGGAGCAGTGCAACTGGCAAGCTCAAAT…	1369		1369	GGTGGTCAAACCAAA	VALID	CCA	Proline
yHMH580_Suhomyces_sp_nov_plate33_SPADES_g001784.m1	4236	ATGGTTAACGTCCCAAAAACTAGAAAGACCTACTGTAAGGGTAAGGAATGTCGTAAACACACCCAACACAAAGTCACCCAATACAAGGCTGGTAAGGCTTCCTTATTCGCCCAAGGTAAGAGAAGATATGACCGTAAACAAAAGGGTTACGGTGGTCAAACCAAGCCAGTTTTCCACAAGAAAGCCAAGACTACCAAGAAGGTTGTCTTGAGATTGGAATGTGTCGTCTGTAAGACTAAGGCTCAACTTTCCTTGAAGAGATGTAAGCACTTCGAATTGGGTGGTGACAAGAAACAAAAGGGTCAAGCTTTACAATTTTAA	ATGGTTAACGTCCCAAAAACTAGAAAGACCTACTGTAAGGGTAAGGAATGTCGTAAACACACCCAACACAAAGTCACCCAATACAAGGCTGGTAAGGCTTCCTTATTCGCCCAAGGTAAGAGAAGATATGACCGTAAACAAAAGGGTTACGGTGGTCAAACCAAGCCAGTTTTCCACAAGAAAGCCAAGACTACCAAGAAGGTTGTCTTGAGATTGGAATGTGTCGTCTGTAAGACTAAGGCTCAACTTTCCTTGAAGAGATGTAAGCACTTCGAATTGGGTGGTGACAAGAAACAAAAGGGTCAAGCTTTACAATTTTAA	151		151	GGTGGTCAAACCAAG	VALID	CCA	Proline
yHMPu5000034647_candida_savonica_180604_g003851.m1	4236	ATGGTTAACGTTCCCAAGACCAGAAAGACCTACTGCAAGGGCAAGGAGTGCCGCAAGCACACCCAGCACAAGGTGACTCAGTACAAGGCCGGTAAGGCTTCCCTTTTCGCTCAGGGTAAGAGAAGATACGACCGTAAGCAGAAGGGTTACGGTGGTCAGACCAAGCCTGTCTTCCACAAGAAGGCCAAGACCACGAAGAAGGTTGTGTTGAGATTGGAGTGTGTTGTCTGCAAGACCAAGGCCCAGCTTTCCTTGAAGAGATGCAAGCACTTCGAGTTGGGTGGTGACAAGAAGCAGAAGGGCCAGGCTTTGCAGTTCTAA	ATGGTTAACGTTCCCAAGACCAGAAAGACCTACTGCAAGGGCAAGGAGTGCCGCAAGCACACCCAGCACAAGGTGACTCAGTACAAGGCCGGTAAGGCTTCCCTTTTCGCTCAGGGTAAGAGAAGATACGACCGTAAGCAGAAGGGTTACGGTGGTCAGACCAAGCCTGTCTTCCACAAGAAGGCCAAGACCACGAAGAAGGTTGTGTTGAGATTGGAGTGTGTTGTCTGCAAGACCAAGGCCCAGCTTTCCTTGAAGAGATGCAAGCACTTCGAGTTGGGTGGTGACAAGAAGCAGAAGGGCCAGGCTTTGCAGTTCTAA	#VALUE!	151	#VALUE!	#VALUE!	#VALUE!	#VALUE!	#VALUE!
yHMPu5000035006_candida_xylopsoci_160519_g000368.m1	4236	ATGGTTAACGTCCCAAAAACTAGAAAGACCTACTGTAAGGGTAAGGAATGTCGTAAACACACCCAACACAAAGTCACCCAATACAAGGCTGGTAAGGCTTCCTTATTCGCTCAAGGTAAGAGAAGATATGACCGTAAACAAAAGGGTTACGGTGGTCAAACCAAGCCAGTTTTCCACAAGAAAGCCAAGACTACCAAGAAGGTTGTCTTGAGATTGGAATGTGTCGTCTGTAAGACCAAGGCTCAACTTTCCTTAAAGAGATGTAAGCACTTCGAATTGGGTGGTGACAAGAAACAAAAGGGTCAAGCTTTACAATTTTAA	ATGGTTAACGTCCCAAAAACTAGAAAGACCTACTGTAAGGGTAAGGAATGTCGTAAACACACCCAACACAAAGTCACCCAATACAAGGCTGGTAAGGCTTCCTTATTCGCTCAAGGTAAGAGAAGATATGACCGTAAACAAAAGGGTTACGGTGGTCAAACCAAGCCAGTTTTCCACAAGAAAGCCAAGACTACCAAGAAGGTTGTCTTGAGATTGGAATGTGTCGTCTGTAAGACCAAGGCTCAACTTTCCTTAAAGAGATGTAAGCACTTCGAATTGGGTGGTGACAAGAAACAAAAGGGTCAAGCTTTACAATTTTAA	151		151	GGTGGTCAAACCAAG	VALID	CCA	Proline
yHMPu5000035008_candida_vadensis_160519_g001680.m1	4236	ATGGTTAACGTCCCAAAAACTAGAAAGACCTACTGTAAGGGTAAGGAATGTCGTAAACACACCCAACACAAAGTCACCCAATATAAGGCTGGTAAGGCTTCTTTATTCGCTCAAGGTAAGAGAAGATATGACCGTAAACAAAAGGGTTACGGTGGTCAAACCAAGCCAGTTTTCCACAAGAAAGCCAAGACTACCAAGAAGGTTGTCTTGAGATTAGAATGTGTTGTCTGTAAGACCAAGGCTCAACTCTCCTTAAAGAGATGTAAGCACTTCGAATTGGGTGGTGACAAGAAACAAAAGGGTCAAGCTTTACAATTTTAA	ATGGTTAACGTCCCAAAAACTAGAAAGACCTACTGTAAGGGTAAGGAATGTCGTAAACACACCCAACACAAAGTCACCCAATATAAGGCTGGTAAGGCTTCTTTATTCGCTCAAGGTAAGAGAAGATATGACCGTAAACAAAAGGGTTACGGTGGTCAAACCAAGCCAGTTTTCCACAAGAAAGCCAAGACTACCAAGAAGGTTGTCTTGAGATTAGAATGTGTTGTCTGTAAGACCAAGGCTCAACTCTCCTTAAAGAGATGTAAGCACTTCGAATTGGGTGGTGACAAGAAACAAAAGGGTCAAGCTTTACAATTTTAA	151		151	GGTGGTCAAACCAAG	VALID	CCA	Proline
yHMPu5000035011_candida_pyralidae_160519_g003954.m1	4236	ATGGTTAACGTCCCAAAAACTAGAAAGACCTACTGTAAGGGTAAGGAATGTCGTAAACACACCCAACACAAAGTCACCCAATATAAGGCCGGTAAAGCCTCCTTATTTGCTCAAGGTAAGAGAAGATATGACCGTAAACAAAAGGGTTACGGTGGTCAAACCAAGCCAGTTTTCCACAAGAAAGCCAAGACTACCAAGAAGGTTGTCTTGAGATTGGAATGTGTTGTCTGTAAGACCAAGGCTCAACTTTCCTTAAAGAGATGTAAGCACTTCGAATTGGGTGGTGACAAGAAACAAAAGGGTCAAGCTTTACAATTTTAA	ATGGTTAACGTCCCAAAAACTAGAAAGACCTACTGTAAGGGTAAGGAATGTCGTAAACACACCCAACACAAAGTCACCCAATATAAGGCCGGTAAAGCCTCCTTATTTGCTCAAGGTAAGAGAAGATATGACCGTAAACAAAAGGGTTACGGTGGTCAAACCAAGCCAGTTTTCCACAAGAAAGCCAAGACTACCAAGAAGGTTGTCTTGAGATTGGAATGTGTTGTCTGTAAGACCAAGGCTCAACTTTCCTTAAAGAGATGTAAGCACTTCGAATTGGGTGGTGACAAGAAACAAAAGGGTCAAGCTTTACAATTTTAA	151		151	GGTGGTCAAACCAAG	VALID	CCA	Proline
yHMPu5000038367_candida_pseudojiufengensis_170713_g003512.m1	4236	ATGGTGAACGTTCCAAAAACTAGAAAAACCTACTGTAAAGGTAAAGAATGTCGTAAACACACTCAACACAAAGTAACCCAATATAAAGCTGGTAAAGCTTCATTATTTGCTCAAGGTAAAAGAAGATATGATAGGAAACAAAAAGGTTATGGTGGTCAAACAAAACCAGTTTTCCATAAAAAAGCCAAAACTACTAAAAAAGTTGTTTTAAGATTAGAATGTGTTGTTTGTAAAACTAAAGCTCAATTATCATTAAAAAGATGTAAACATTTCGAATTGGGTGGTGATAAAAAACAAAAAGGTCAAGCTTTACAATTTTAA	ATGGTGAACGTTCCAAAAACTAGAAAAACCTACTGTAAAGGTAAAGAATGTCGTAAACACACTCAACACAAAGTAACCCAATATAAAGCTGGTAAAGCTTCATTATTTGCTCAAGGTAAAAGAAGATATGATAGGAAACAAAAAGGTTATGGTGGTCAAACAAAACCAGTTTTCCATAAAAAAGCCAAAACTACTAAAAAAGTTGTTTTAAGATTAGAATGTGTTGTTTGTAAAACTAAAGCTCAATTATCATTAAAAAGATGTAAACATTTCGAATTGGGTGGTGATAAAAAACAAAAAGGTCAAGCTTTACAATTTTAA	151		151	GGTGGTCAAACAAAA	VALID	CCA	Proline
yHMPu5000038400_candida_alishanica_190924_g004861.m1	4236	ATGGTTAACGTTCCAAAAACTAGAAAGACCTACTGTAAGGGTAAGGAATGTCGTAAGCACACCCAACACAAGGTTACTCAATACAAGGCTGGTAAGGCTTCCTTGTTCGCTCAAGGTAAGAGAAGATATGACCGTAAACAAAAGGGTTACGGTGGTCAAACCAAGCCAGTTTTCCACAAGAAAGCTAAGACTACCAAGAAGGTTGTCTTGAGATTGGAATGTGTTGTCTGCAAGACCAAGGCTCAATTGTCCTTGAAGAGATGTAAGCACTTCGAATTGGGTGGTGACAAGAAGCAAAAGGGTCAAGCCTTGCAATTTTAA	ATGGTTAACGTTCCAAAAACTAGAAAGACCTACTGTAAGGGTAAGGAATGTCGTAAGCACACCCAACACAAGGTTACTCAATACAAGGCTGGTAAGGCTTCCTTGTTCGCTCAAGGTAAGAGAAGATATGACCGTAAACAAAAGGGTTACGGTGGTCAAACCAAGCCAGTTTTCCACAAGAAAGCTAAGACTACCAAGAAGGTTGTCTTGAGATTGGAATGTGTTGTCTGCAAGACCAAGGCTCAATTGTCCTTGAAGAGATGTAAGCACTTCGAATTGGGTGGTGACAAGAAGCAAAAGGGTCAAGCCTTGCAATTTTAA	151		151	GGTGGTCAAACCAAG	VALID	CCA	Proline
yHMPu5000040910_suhomyces_kilbournensis_201018_g000132.m1	4236	ATGGTTAACGTCCCAAAAACTAGAAAGACCTACTGTAAGGGTAAGGAATGTCGTAAACACACCCAACACAAAGTCACCCAATACAAGGCTGGTAAGGCTTCCTTATTCGCTCAAGGTAAGAGAAGATATGACCGTAAACAAAAGGGTTACGGTGGTCAAACCAAGCCAGTTTTCCACAAGAAAGCCAAGACTACCAAGAAGGTTGTCTTGAGATTGGAATGTGTCGTCTGTAAGACCAAGGCTCAACTTTCCTTAAAGAGATGTAAGCACTTCGAATTGGGTGGTGACAAGAAACAAAAGGGTCAAGCTTTACAATTTTAA	ATGGTTAACGTCCCAAAAACTAGAAAGACCTACTGTAAGGGTAAGGAATGTCGTAAACACACCCAACACAAAGTCACCCAATACAAGGCTGGTAAGGCTTCCTTATTCGCTCAAGGTAAGAGAAGATATGACCGTAAACAAAAGGGTTACGGTGGTCAAACCAAGCCAGTTTTCCACAAGAAAGCCAAGACTACCAAGAAGGTTGTCTTGAGATTGGAATGTGTCGTCTGTAAGACCAAGGCTCAACTTTCCTTAAAGAGATGTAAGCACTTCGAATTGGGTGGTGACAAGAAACAAAAGGGTCAAGCTTTACAATTTTAA	151		151	GGTGGTCAAACCAAG	VALID	CCA	Proline
yHQL449_Kodamaea_sp_nov_plate33_PLATANUS_g004890.m1	4236	ATGGTTAACGTTCCAAAAACTAGAAAGACCTACTGTAAGGGTAAGGAATGTCGTAAGCACACCCAACACAAGGTTACTCAATACAAGGCTGGTAAGGCTTCCTTGTTCGCTCAAGGTAAGAGAAGATATGACCGTAAACAAAAGGGTTACGGTGGTCAAACCAAGCCAGTTTTCCACAAGAAAGCTAAGACTACCAAGAAGGTTGTCTTGAGATTGGAATGTGTTGTCTGCAAGACCAAGGCTCAATTGTCCTTGAAGAGATGTAAGCACTTCGAATTGGGTGGTGACAAGAAGCAAAAGGGTCAAGCCTTGCAATTTTAA	ATGGTTAACGTTCCAAAAACTAGAAAGACCTACTGTAAGGGTAAGGAATGTCGTAAGCACACCCAACACAAGGTTACTCAATACAAGGCTGGTAAGGCTTCCTTGTTCGCTCAAGGTAAGAGAAGATATGACCGTAAACAAAAGGGTTACGGTGGTCAAACCAAGCCAGTTTTCCACAAGAAAGCTAAGACTACCAAGAAGGTTGTCTTGAGATTGGAATGTGTTGTCTGCAAGACCAAGGCTCAATTGTCCTTGAAGAGATGTAAGCACTTCGAATTGGGTGGTGACAAGAAGCAAAAGGGTCAAGCCTTGCAATTTTAA	151		151	GGTGGTCAAACCAAG	VALID	CCA	Proline
yHMPu5000034659_debaryomyces_hansenii_180604_g000163.m1	4236	ATGGTTAACGTTCCAAAGACTAGAAGGACTTACTGTAAGGGTAAGGAATGTCGTAAGCATACTCAACACAAGGTTACCCAATACAAGGCCGGTAAAGCCTCTTTATTCGCTCAAGGTAAGAGAAGATATGACCGTAAGCAAAAGGGTTACGGTGGTCAAACCAAGCCAGTTTTCCACAAAAAGGCTAAGACTACCAAGAAGGTTGTTTTAAGATTGGAATGTGTCGTCTGTAAGACCAAGGCTCAATTATCTTTAAAGAGATGTAAGCACTTCGAATTAGGTGGTGACAAGAAGCAAAAGGGTCAAGCTTTACAATTTTAA	ATGGTTAACGTTCCAAAGACTAGAAGGACTTACTGTAAGGGTAAGGAATGTCGTAAGCATACTCAACACAAGGTTACCCAATACAAGGCCGGTAAAGCCTCTTTATTCGCTCAAGGTAAGAGAAGATATGACCGTAAGCAAAAGGGTTACGGTGGTCAAACCAAGCCAGTTTTCCACAAAAAGGCTAAGACTACCAAGAAGGTTGTTTTAAGATTGGAATGTGTCGTCTGTAAGACCAAGGCTCAATTATCTTTAAAGAGATGTAAGCACTTCGAATTAGGTGGTGACAAGAAGCAAAAGGGTCAAGCTTTACAATTTTAA	151		151	GGTGGTCAAACCAAG	VALID	CCA	Proline
yHMPu5000035007_candida_wounanorum_170307_g002255.m1	4236	ATGGTTAACGTCCCAAAAACTAGAAAGACCTACTGTAAGGGTAAGGAGTGCCGTAAGCACACCCAACACAAAGTCACCCAATACAAGGCTGGTAAGGCTTCTTTGTTCGCTCAAGGTAAGAGAAGATATGACCGTAAGCAAAAGGGTTACGGTGGTCAAACTAAGCCAGTTTTCCACAAGAAGGCTAAGACTACCAAGAAGGTCGTCTTGAGATTGGAATGTGTTGTTTGCAAGACCAGAGCTCAACTTTCCTTGAAGAGATGTAAGCACTTCGAATTGGGTGGTGACAAGAAGCAAAAGGGTCAAGCCTTGCAATTCTAA	ATGGTTAACGTCCCAAAAACTAGAAAGACCTACTGTAAGGGTAAGGAGTGCCGTAAGCACACCCAACACAAAGTCACCCAATACAAGGCTGGTAAGGCTTCTTTGTTCGCTCAAGGTAAGAGAAGATATGACCGTAAGCAAAAGGGTTACGGTGGTCAAACTAAGCCAGTTTTCCACAAGAAGGCTAAGACTACCAAGAAGGTCGTCTTGAGATTGGAATGTGTTGTTTGCAAGACCAGAGCTCAACTTTCCTTGAAGAGATGTAAGCACTTCGAATTGGGTGGTGACAAGAAGCAAAAGGGTCAAGCCTTGCAATTCTAA	151		151	GGTGGTCAAACTAAG	VALID	CCA	Proline
yHMPu5000035009_candida_terraborum_160519_g003437.m1	4236	ATGGTTAACGTCCCCAAAACTAGAAAGACCTACTGTAAGGGTAAGGAGTGCAGAAAGCACACCCAACACAAAGTCACCCAATACAAGGCTGGTAAGGCTTCTTTGTTCGCTCAAGGTAAGAGAAGATATGACCGTAAGCAAAAGGGTTACGGTGGTCAAACCAAGCCAGTTTTCCACAAGAAGGCTAAGACCACCAAGAAGGTCGTCTTGAGATTGGAATGTGTTGTTTGCAAGACCAGAGCTCAACTTTCCTTGAAGAGATGTAAGCACTTCGAATTGGGTGGTGACAAGAAGCAAAAGGGTCAAGCCTTGCAATTCTAA	ATGGTTAACGTCCCCAAAACTAGAAAGACCTACTGTAAGGGTAAGGAGTGCAGAAAGCACACCCAACACAAAGTCACCCAATACAAGGCTGGTAAGGCTTCTTTGTTCGCTCAAGGTAAGAGAAGATATGACCGTAAGCAAAAGGGTTACGGTGGTCAAACCAAGCCAGTTTTCCACAAGAAGGCTAAGACCACCAAGAAGGTCGTCTTGAGATTGGAATGTGTTGTTTGCAAGACCAGAGCTCAACTTTCCTTGAAGAGATGTAAGCACTTCGAATTGGGTGGTGACAAGAAGCAAAAGGGTCAAGCCTTGCAATTCTAA	151		151	GGTGGTCAAACCAAG	VALID	CCA	Proline
yHMPu5000035010_candida_tanzawaensis_190924_g000273.m1	4236	ATGGTTAACGTTCCAAAAACTAGAAAGACCTACTGTAAGGGTAAGGAATGTCGTAAACACACCCAACACAAAGTCACCCAATACAAGGCTGGTAAGGCTTCTTTGTTCGCTCAAGGTAAGAGAAGATACGACCGTAAGCAAAAGGGTTACGGTGGTCAAACCAAGCCAGTTTTCCACAAGAAGGCCAAGACTACCAAGAAGGTTGTTTTGAGATTGGAATGTGTTGTCTGCAAGACCAGAGCTCAACTTTCTTTGAAGAGATGTAAGCACTTCGAATTAGGTGGTGACAAGAAGCAAAAGGGTCAAGCCTTACAATTCTAA	ATGGTTAACGTTCCAAAAACTAGAAAGACCTACTGTAAGGGTAAGGAATGTCGTAAACACACCCAACACAAAGTCACCCAATACAAGGCTGGTAAGGCTTCTTTGTTCGCTCAAGGTAAGAGAAGATACGACCGTAAGCAAAAGGGTTACGGTGGTCAAACCAAGCCAGTTTTCCACAAGAAGGCCAAGACTACCAAGAAGGTTGTTTTGAGATTGGAATGTGTTGTCTGCAAGACCAGAGCTCAACTTTCTTTGAAGAGATGTAAGCACTTCGAATTAGGTGGTGACAAGAAGCAAAAGGGTCAAGCCTTACAATTCTAA	151		151	GGTGGTCAAACCAAG	VALID	CCA	Proline
yHMPu5000035013_candida_panamericana_160519_g004116.m1	4236	ATGGTTAACGTCCCAAAAACTAGAAAGACCTACTGTAAGGGTAAGGAGTGCAGAAAGCACACCCAACACAAAGTCACCCAATACAAGGCTGGTAAGGCTTCTTTGTTTGCCCAAGGTAAGAGAAGATACGACCGTAAGCAAAAGGGTTACGGTGGTCAAACCAAGCCAGTTTTCCACAAGAAGGCCAAGACCACCAAGAAGGTTGTCTTGAGATTGGAGTGTGTTGTCTGCAAGACCAGAGCTCAGCTCTCCTTGAAGAGATGTAAGCACTTCGAGTTGGGTGGTGACAAGAAGCAAAAGGGTCAAGCCTTGCAATTCTAA	ATGGTTAACGTCCCAAAAACTAGAAAGACCTACTGTAAGGGTAAGGAGTGCAGAAAGCACACCCAACACAAAGTCACCCAATACAAGGCTGGTAAGGCTTCTTTGTTTGCCCAAGGTAAGAGAAGATACGACCGTAAGCAAAAGGGTTACGGTGGTCAAACCAAGCCAGTTTTCCACAAGAAGGCCAAGACCACCAAGAAGGTTGTCTTGAGATTGGAGTGTGTTGTCTGCAAGACCAGAGCTCAGCTCTCCTTGAAGAGATGTAAGCACTTCGAGTTGGGTGGTGACAAGAAGCAAAAGGGTCAAGCCTTGCAATTCTAA	151		151	GGTGGTCAAACCAAG	VALID	CCA	Proline
yHMPu5000035014_candida_atakaporum_190924_g001651.m1	4236	ATGGTTAACGTTCCAAAAACTAGAAAGACCTACTGTAAGGGTAAGGAATGTCGTAAGCACACCCAACACAAAGTCACCCAATACAAGGCTGGTAAGGCTTCTTTGTTCGCTCAAGGTAAGAGAAGATATGACCGTAAGCAAAAGGGTTACGGTGGTCAAACCAAGCCAGTTTTCCACAAGAAGGCCAAGACTACCAAGAAGGTTGTTTTGAGATTGGAATGTGTTGTCTGCAAGACCAGAGCTCAACTTTCTTTGAAGAGATGTAAGCACTTCGAATTAGGTGGTGACAAGAAGCAAAAGGGTCAAGCTTTGCAATTCTAA	ATGGTTAACGTTCCAAAAACTAGAAAGACCTACTGTAAGGGTAAGGAATGTCGTAAGCACACCCAACACAAAGTCACCCAATACAAGGCTGGTAAGGCTTCTTTGTTCGCTCAAGGTAAGAGAAGATATGACCGTAAGCAAAAGGGTTACGGTGGTCAAACCAAGCCAGTTTTCCACAAGAAGGCCAAGACTACCAAGAAGGTTGTTTTGAGATTGGAATGTGTTGTCTGCAAGACCAGAGCTCAACTTTCTTTGAAGAGATGTAAGCACTTCGAATTAGGTGGTGACAAGAAGCAAAAGGGTCAAGCTTTGCAATTCTAA	151		151	GGTGGTCAAACCAAG	VALID	CCA	Proline
yHMPu5000035015_candida_bokatorum_160519_g003419.m1	4236	ATGGTTAACGTCCCAAAAACTAGAAAGACCTACTGTAAGGGTAAGGAGTGCAGAAAGCACACCCAACACAAAGTCACCCAATACAAGGCTGGTAAGGCTTCTTTGTTTGCCCAAGGTAAAAGAAGATACGACCGTAAGCAAAAGGGTTACGGTGGTCAAACCAAGCCAGTTTTCCACAAGAAGGCCAAGACCACCAAGAAGGTTGTCTTGAGATTGGAGTGTGTCGTCTGCAAGACCAGAGCTCAGCTCTCCTTGAAGAGATGTAAGCACTTCGAGTTGGGTGGTGACAAGAAGCAAAAGGGTCAAGCCTTGCAATTCTAA	ATGGTTAACGTCCCAAAAACTAGAAAGACCTACTGTAAGGGTAAGGAGTGCAGAAAGCACACCCAACACAAAGTCACCCAATACAAGGCTGGTAAGGCTTCTTTGTTTGCCCAAGGTAAAAGAAGATACGACCGTAAGCAAAAGGGTTACGGTGGTCAAACCAAGCCAGTTTTCCACAAGAAGGCCAAGACCACCAAGAAGGTTGTCTTGAGATTGGAGTGTGTCGTCTGCAAGACCAGAGCTCAGCTCTCCTTGAAGAGATGTAAGCACTTCGAGTTGGGTGGTGACAAGAAGCAAAAGGGTCAAGCCTTGCAATTCTAA	151		151	GGTGGTCAAACCAAG	VALID	CCA	Proline
yHMPu5000035017_candida_bribrorum_160519_g002252.m1	4236	ATGGTTAACGTTCCAAAAACTAGAAAGACCTACTGTAAGGGTAAGGAATGTCGTAAACACACCCAACACAAAGTCACCCAATACAAGGCTGGTAAGGCTTCTTTATTTGCTCAAGGTAAGAGAAGATATGACCGTAAGCAAAAGGGTTACGGTGGTCAAACCAAGCCAGTTTTCCACAAGAAAGCTAAGACTACCAAGAAGGTCGTTTTGAGATTGGAATGTGTTGTCTGCAAGACCAGAGCTCAACTTTCATTGAAGAGATGTAAGCATTTCGAATTAGGTGGTGACAAGAAGCAAAAGGGTCAAGCCTTACAATTTTAA	ATGGTTAACGTTCCAAAAACTAGAAAGACCTACTGTAAGGGTAAGGAATGTCGTAAACACACCCAACACAAAGTCACCCAATACAAGGCTGGTAAGGCTTCTTTATTTGCTCAAGGTAAGAGAAGATATGACCGTAAGCAAAAGGGTTACGGTGGTCAAACCAAGCCAGTTTTCCACAAGAAAGCTAAGACTACCAAGAAGGTCGTTTTGAGATTGGAATGTGTTGTCTGCAAGACCAGAGCTCAACTTTCATTGAAGAGATGTAAGCATTTCGAATTAGGTGGTGACAAGAAGCAAAAGGGTCAAGCCTTACAATTTTAA	151		151	GGTGGTCAAACCAAG	VALID	CCA	Proline
yHMPu5000035018_candida_canberraensis_160519_g004402.m1	4236	ATGGTTAACGTTCCAAAAACTAGAAAGACCTACTGTAAGGGTAAGGAATGTCGTAAGCACACTCAACACAAGGTCACCCAATACAAGGCTGGTAAGGCTTCTTTGTTCGCTCAAGGTAAGAGAAGATATGACCGTAAGCAAAAGGGTTACGGTGGTCAAACCAAGCCAGTTTTCCACAAGAAGGCTAAGACCACCAAGAAGGTTGTCTTGAGATTGGAATGTGTTGTTTGCAAGACCAGAGCTCAACTTTCCTTGAAGAGATGTAAGCACTTTGAATTGGGTGGTGACAAGAAGCAAAAGGGTCAAGCCTTGCAATTCTAA	ATGGTTAACGTTCCAAAAACTAGAAAGACCTACTGTAAGGGTAAGGAATGTCGTAAGCACACTCAACACAAGGTCACCCAATACAAGGCTGGTAAGGCTTCTTTGTTCGCTCAAGGTAAGAGAAGATATGACCGTAAGCAAAAGGGTTACGGTGGTCAAACCAAGCCAGTTTTCCACAAGAAGGCTAAGACCACCAAGAAGGTTGTCTTGAGATTGGAATGTGTTGTTTGCAAGACCAGAGCTCAACTTTCCTTGAAGAGATGTAAGCACTTTGAATTGGGTGGTGACAAGAAGCAAAAGGGTCAAGCCTTGCAATTCTAA	151		151	GGTGGTCAAACCAAG	VALID	CCA	Proline
yHMPu5000035022_candida_emberorum_160519_g004806.m1	4236	ATGGTTAACGTCCCAAAAACTAGAAAGACCTACTGTAAGGGTAAGGAGTGCCGTAAGCACACCCAACACAAAGTCACCCAATACAAGGCTGGTAAGGCTTCTTTGTTCGCTCAAGGTAAGAGAAGATATGACCGTAAGCAAAAGGGTTACGGTGGTCAAACTAAGCCAGTTTTCCACAAGAAGGCTAAGACTACCAAGAAGGTCGTCTTGAGATTGGAATGTGTTGTTTGCAAGACCAGAGCTCAACTTTCCTTGAAGAGATGTAAGCACTTCGAATTGGGTGGTGACAAGAAGCAAAAGGGTCAAGCCTTGCAATTCTAA	ATGGTTAACGTCCCAAAAACTAGAAAGACCTACTGTAAGGGTAAGGAGTGCCGTAAGCACACCCAACACAAAGTCACCCAATACAAGGCTGGTAAGGCTTCTTTGTTCGCTCAAGGTAAGAGAAGATATGACCGTAAGCAAAAGGGTTACGGTGGTCAAACTAAGCCAGTTTTCCACAAGAAGGCTAAGACTACCAAGAAGGTCGTCTTGAGATTGGAATGTGTTGTTTGCAAGACCAGAGCTCAACTTTCCTTGAAGAGATGTAAGCACTTCGAATTGGGTGGTGACAAGAAGCAAAAGGGTCAAGCCTTGCAATTCTAA	151		151	GGTGGTCAAACTAAG	VALID	CCA	Proline
yHMPu5000035023_candida_guaymorum_160519_g005529.m1	4236	ATGGTTAACGTTCCAAAGACTAGAAAGACTTACTGTAAGGGTAAGGAATGCCGTAAGCACACCCAACACAAGGTTACTCAATACAAGGCTGGTAAGGCTTCCTTGTTCGCCCAAGGTAAGAGAAGATATGACCGTAAGCAAAAGGGTTACGGTGGTCAAACCAAGCCAGTTTTCCACAAGAAGGCTAAGACCACCAAGAAGGTCGTTTTGAGATTGGAATGTGTTGTCTGCAAGACCAGAGCTCAACTCTCCTTGAAGAGATGTAAGCACTTCGAATTGGGTGGTGACAAGAAGCAAAAGGGTCAAGCCTTACAATTCTAA	ATGGTTAACGTTCCAAAGACTAGAAAGACTTACTGTAAGGGTAAGGAATGCCGTAAGCACACCCAACACAAGGTTACTCAATACAAGGCTGGTAAGGCTTCCTTGTTCGCCCAAGGTAAGAGAAGATATGACCGTAAGCAAAAGGGTTACGGTGGTCAAACCAAGCCAGTTTTCCACAAGAAGGCTAAGACCACCAAGAAGGTCGTTTTGAGATTGGAATGTGTTGTCTGCAAGACCAGAGCTCAACTCTCCTTGAAGAGATGTAAGCACTTCGAATTGGGTGGTGACAAGAAGCAAAAGGGTCAAGCCTTACAATTCTAA	151		151	GGTGGTCAAACCAAG	VALID	CCA	Proline
yHMPu5000035024_Candida_kunorum_SPADES_g004171.m1	4236	ATGGTTAACGTCCCAAAAACTAGAAAGACCTACTGTAAGGGTAAGGAGTGCCGCAAGCACACCCAACACAAAGTCACCCAATACAAGGCTGGTAAGGCTTCTTTGTTCGCCCAGGGTAAGAGAAGATACGACCGTAAGCAAAAGGGTTACGGTGGTCAAACCAAGCCAGTTTTCCACAAGAAGGCCAAGACCACCAAGAAGGTTGTCTTGAGATTGGAATGTGTTGTTTGCAAGACCAGAGCTCAACTTTCGTTGAAGAGATGTAAGCACTTCGAATTGGGTGGTGACAAGAAGCAAAAGGGTCAAGCCTTGCAATTCTAA	ATGGTTAACGTCCCAAAAACTAGAAAGACCTACTGTAAGGGTAAGGAGTGCCGCAAGCACACCCAACACAAAGTCACCCAATACAAGGCTGGTAAGGCTTCTTTGTTCGCCCAGGGTAAGAGAAGATACGACCGTAAGCAAAAGGGTTACGGTGGTCAAACCAAGCCAGTTTTCCACAAGAAGGCCAAGACCACCAAGAAGGTTGTCTTGAGATTGGAATGTGTTGTTTGCAAGACCAGAGCTCAACTTTCGTTGAAGAGATGTAAGCACTTCGAATTGGGTGGTGACAAGAAGCAAAAGGGTCAAGCCTTGCAATTCTAA	151		151	GGTGGTCAAACCAAG	VALID	CCA	Proline
yHMPu5000035025_candida_maxii_160519_g001910.m1	4236	ATGGTTAACGTTCCAAAAACTAGAAAGACCTACTGTAAGGGTAAGGAATGTCGTAAGCACACCCAACACAAAGTTACCCAATACAAGGCTGGTAAGGCTTCTTTATTCGCTCAAGGTAAGAGAAGATATGACCGTAAGCAAAAGGGTTACGGTGGTCAAACCAAGCCAGTTTTCCACAAGAAAGCCAAGACTACCAAGAAGGTCGTTTTAAGATTGGAATGTGTTGTCTGCAAGACCAGAGCTCAACTTTCATTAAAGAGATGTAAGCACTTCGAATTAGGTGGTGACAAGAAGCAAAAGGGTCAAGCCTTACAATTTTAA	ATGGTTAACGTTCCAAAAACTAGAAAGACCTACTGTAAGGGTAAGGAATGTCGTAAGCACACCCAACACAAAGTTACCCAATACAAGGCTGGTAAGGCTTCTTTATTCGCTCAAGGTAAGAGAAGATATGACCGTAAGCAAAAGGGTTACGGTGGTCAAACCAAGCCAGTTTTCCACAAGAAAGCCAAGACTACCAAGAAGGTCGTTTTAAGATTGGAATGTGTTGTCTGCAAGACCAGAGCTCAACTTTCATTAAAGAGATGTAAGCACTTCGAATTAGGTGGTGACAAGAAGCAAAAGGGTCAAGCCTTACAATTTTAA	151		151	GGTGGTCAAACCAAG	VALID	CCA	Proline
yHMPu5000035026_Candida_anneliseae_SPADES_g003467.m1	4236	ATGGTTAACGTTCCAAAAACTAGAAAGACCTACTGTAAGGGTAAGGAATGTCGTAAACACACCCAACACAAAGTCACCCAATACAAGGCTGGTAAGGCTTCTTTATTCGCTCAAGGTAAGAGAAGATATGACCGTAAGCAAAAGGGTTACGGTGGTCAAACCAAGCCAGTTTTCCACAAGAAAGCTAAGACTACCAAGAAGGTCGTTTTAAGATTGGAATGTGTTGTCTGCAAGACCAGAGCTCAACTTTCATTGAAGAGATGTAAGCACTTCGAATTAGGTGGTGACAAGAAGCAAAAGGGTCAAGCCTTACAATTTTAA	ATGGTTAACGTTCCAAAAACTAGAAAGACCTACTGTAAGGGTAAGGAATGTCGTAAACACACCCAACACAAAGTCACCCAATACAAGGCTGGTAAGGCTTCTTTATTCGCTCAAGGTAAGAGAAGATATGACCGTAAGCAAAAGGGTTACGGTGGTCAAACCAAGCCAGTTTTCCACAAGAAAGCTAAGACTACCAAGAAGGTCGTTTTAAGATTGGAATGTGTTGTCTGCAAGACCAGAGCTCAACTTTCATTGAAGAGATGTAAGCACTTCGAATTAGGTGGTGACAAGAAGCAAAAGGGTCAAGCCTTACAATTTTAA	151		151	GGTGGTCAAACCAAG	VALID	CCA	Proline
yHMPu5000035027_candida_ambrosiae_160519_g005225.m1	4236	ATGGTTAACGTTCCAAAAACTAGAAAGACCTACTGTAAGGGTAAGGAATGTCGTAAGCACACCCAACACAAAGTCACCCAATACAAGGCTGGTAAGGCTTCTTTGTTCGCTCAAGGTAAGAGAAGATATGACCGTAAGCAAAAGGGTTACGGTGGTCAAACCAAGCCAGTTTTCCACAAGAAGGCCAAGACTACCAAGAAGGTTGTTTTGAGATTGGAATGTGTTGTCTGCAAGACCAGAGCTCAACTTTCTTTGAAGAGATGTAAGCACTTCGAATTAGGTGGTGACAAGAAGCAAAAGGGTCAAGCTTTGCAATTCTAA	ATGGTTAACGTTCCAAAAACTAGAAAGACCTACTGTAAGGGTAAGGAATGTCGTAAGCACACCCAACACAAAGTCACCCAATACAAGGCTGGTAAGGCTTCTTTGTTCGCTCAAGGTAAGAGAAGATATGACCGTAAGCAAAAGGGTTACGGTGGTCAAACCAAGCCAGTTTTCCACAAGAAGGCCAAGACTACCAAGAAGGTTGTTTTGAGATTGGAATGTGTTGTCTGCAAGACCAGAGCTCAACTTTCTTTGAAGAGATGTAAGCACTTCGAATTAGGTGGTGACAAGAAGCAAAAGGGTCAAGCTTTGCAATTCTAA	151		151	GGTGGTCAAACCAAG	VALID	CCA	Proline
yHMPu5000037234_suhomyces_coccinellae_210210_g002012.m1	4236	ATGGTTAACGTCCCAAAAACTAGAAAGACCTACTGTAAGGGTAAGGAGTGCAGAAAGCACACCCAACACAAAGTCACCCAATACAAGGCTGGTAAGGCTTCTTTGTTCGCCCAAGGTAAGAGAAGATACGACCGTAAGCAAAAGGGTTACGGTGGTCAAACCAAGCCAGTTTTCCACAAGAAGGCCAAGACCACCAAGAAGGTTGTCTTGAGATTGGAGTGTGTTGTCTGCAAGACCAGAGCTCAGCTCTCCTTGAAGAGATGTAAGCACTTCGAGTTGGGTGGTGACAAGAAGCAAAAGGGTCAAGCCTTGCAATTCTAA	ATGGTTAACGTCCCAAAAACTAGAAAGACCTACTGTAAGGGTAAGGAGTGCAGAAAGCACACCCAACACAAAGTCACCCAATACAAGGCTGGTAAGGCTTCTTTGTTCGCCCAAGGTAAGAGAAGATACGACCGTAAGCAAAAGGGTTACGGTGGTCAAACCAAGCCAGTTTTCCACAAGAAGGCCAAGACCACCAAGAAGGTTGTCTTGAGATTGGAGTGTGTTGTCTGCAAGACCAGAGCTCAGCTCTCCTTGAAGAGATGTAAGCACTTCGAGTTGGGTGGTGACAAGAAGCAAAAGGGTCAAGCCTTGCAATTCTAA	151		151	GGTGGTCAAACCAAG	VALID	CCA	Proline
yHMPu5000037924_candida_taliae_201018_g005449.m1	4236	ATGGTTAACGTTCCAAAAACTAGAAAGACCTACTGTAAGGGTAAGGAATGTCGTAAACACACCCAACACAAAGTCACCCAATACAAGGCTGGTAAGGCTTCTTTATTCGCTCAAGGTAAGAGAAGATATGACCGTAAGCAAAAGGGTTACGGTGGTCAAACCAAGCCAGTTTTCCACAAGAAAGCTAAGACTACCAAGAAGGTCGTTTTAAGATTGGAATGTGTTGTCTGCAAGACCAGAGCTCAACTTTCATTGAAGAGATGTAAGCACTTCGAATTAGGTGGTGACAAGAAGCAAAAGGGTCAAGCCTTACAATTTTAA	ATGGTTAACGTTCCAAAAACTAGAAAGACCTACTGTAAGGGTAAGGAATGTCGTAAACACACCCAACACAAAGTCACCCAATACAAGGCTGGTAAGGCTTCTTTATTCGCTCAAGGTAAGAGAAGATATGACCGTAAGCAAAAGGGTTACGGTGGTCAAACCAAGCCAGTTTTCCACAAGAAAGCTAAGACTACCAAGAAGGTCGTTTTAAGATTGGAATGTGTTGTCTGCAAGACCAGAGCTCAACTTTCATTGAAGAGATGTAAGCACTTCGAATTAGGTGGTGACAAGAAGCAAAAGGGTCAAGCCTTACAATTTTAA	151		151	GGTGGTCAAACCAAG	VALID	CCA	Proline
yHMPu5000038041_suhomyces_yuchorum_170912_g004211.m1	4236	ATGGTTAACGTCCCAAAAACTAGAAAGACCTACTGTAAGGGTAAGGAGTGCCGTAAGCACACCCAACACAAAGTCACCCAATACAAGGCTGGTAAGGCTTCTTTGTTCGCTCAAGGTAAGAGAAGATATGACCGTAAGCAAAAGGGTTACGGTGGTCAAACTAAGCCAGTTTTCCACAAGAAGGCTAAGACTACCAAGAAGGTCGTCTTGAGATTGGAATGTGTTGTTTGCAAGACCAGAGCTCAACTTTCCTTGAAGAGATGTAAGCACTTCGAATTGGGTGGTGACAAGAAGCAAAAGGGTCAAGCCTTGCAATTCTAA	ATGGTTAACGTCCCAAAAACTAGAAAGACCTACTGTAAGGGTAAGGAGTGCCGTAAGCACACCCAACACAAAGTCACCCAATACAAGGCTGGTAAGGCTTCTTTGTTCGCTCAAGGTAAGAGAAGATATGACCGTAAGCAAAAGGGTTACGGTGGTCAAACTAAGCCAGTTTTCCACAAGAAGGCTAAGACTACCAAGAAGGTCGTCTTGAGATTGGAATGTGTTGTTTGCAAGACCAGAGCTCAACTTTCCTTGAAGAGATGTAAGCACTTCGAATTGGGTGGTGACAAGAAGCAAAAGGGTCAAGCCTTGCAATTCTAA	151		151	GGTGGTCAAACTAAG	VALID	CCA	Proline
yHMPu5000037903_candida_multigemmis_180604_g003926.m1	4236	ATGGTTAACGTTCCAAAGACTAGAAAGACCTACTGTAAAGGTAAGGAATGTCGTAAACACACTCAACACAAAGTTACTCAATACAAAGCTGGTAAAGCTTCCTTATTCGCTCAAGGTAAGAGAAGATATGACCGTAAACAAAAAGGTTACGGTGGTCAAACCAAGCCAGTTTTCCACAAGAAAGCTAAGACTACCAAAAAGGTTGTTTTAAGATTAGAATGTGTTGTCTGTAAGACCAAAGCTCAATTATCTTTAAAGAGATGTAAGCACTTCGAATTAGGTGGTGACCGTAAACAAAAGGGTCAAGCTTTACAATTTTAA	ATGGTTAACGTTCCAAAGACTAGAAAGACCTACTGTAAAGGTAAGGAATGTCGTAAACACACTCAACACAAAGTTACTCAATACAAAGCTGGTAAAGCTTCCTTATTCGCTCAAGGTAAGAGAAGATATGACCGTAAACAAAAAGGTTACGGTGGTCAAACCAAGCCAGTTTTCCACAAGAAAGCTAAGACTACCAAAAAGGTTGTTTTAAGATTAGAATGTGTTGTCTGTAAGACCAAAGCTCAATTATCTTTAAAGAGATGTAAGCACTTCGAATTAGGTGGTGACCGTAAACAAAAGGGTCAAGCTTTACAATTTTAA	151		151	GGTGGTCAAACCAAG	VALID	CCA	Proline
yHMPu5000038374_candida_jiufengensis_170713_g001756.m1	4236	ATGGTGAACGTTCCAAAAACTAGAAAAACCTACTGTAAAGGTAGAGAATGTCGTAAACATACTCAACATAAAGTAACCCAATACAAAGCTGGTAAAGCTTCATTATTTGCTCAAGGTAAAAGAAGATATGACAGAAAACAAAAAGGTTATGGTGGTCAAACTAAACCAGTTTTCCATAAAAAAGCTAAAACTACCAAAAAAGTTGTTTTAAGATTAGAATGTGTTGTTTGTAAAACTAAAGCTCAATTATCTTTAAAAAGATGTAAACATTTCGAATTAGGTGGTGATAAAAAACAAAAAGGTCAAGCTTTACAATTTTAA	ATGGTGAACGTTCCAAAAACTAGAAAAACCTACTGTAAAGGTAGAGAATGTCGTAAACATACTCAACATAAAGTAACCCAATACAAAGCTGGTAAAGCTTCATTATTTGCTCAAGGTAAAAGAAGATATGACAGAAAACAAAAAGGTTATGGTGGTCAAACTAAACCAGTTTTCCATAAAAAAGCTAAAACTACCAAAAAAGTTGTTTTAAGATTAGAATGTGTTGTTTGTAAAACTAAAGCTCAATTATCTTTAAAAAGATGTAAACATTTCGAATTAGGTGGTGATAAAAAACAAAAAGGTCAAGCTTTACAATTTTAA	151		151	GGTGGTCAAACTAAA	VALID	CCA	Proline
yHMPu5000040909_suhomyces_sequanensis_200128_g000764.m1	4236	ATGGTTAACGTTCCAAAAACTAGAAAGACTTACTGTAAAGGTAGAGAATGTCGTAAACATACCCAACATAAAGTTACCCAATATAAAGCTGGTAAAGCTTCTTTATTCGCTCAAGGTAAAAGAAGATATGACCGTAAACAAAAAGGTTACGGTGGTCAAACCAAACCAGTTTTCCATAAAAAAGCTAAAACTACCAAAAAAGTTGTTTTAAGATTAGAATGTGTTGTTTGTAAAACCAAAGCTCAATTATCATTAAAGAGATGTAAACATTTCGAATTGGGTGGTGATAAAAAACAAAAAGGTCAAGCTTTACAATTTTAA	ATGGTTAACGTTCCAAAAACTAGAAAGACTTACTGTAAAGGTAGAGAATGTCGTAAACATACCCAACATAAAGTTACCCAATATAAAGCTGGTAAAGCTTCTTTATTCGCTCAAGGTAAAAGAAGATATGACCGTAAACAAAAAGGTTACGGTGGTCAAACCAAACCAGTTTTCCATAAAAAAGCTAAAACTACCAAAAAAGTTGTTTTAAGATTAGAATGTGTTGTTTGTAAAACCAAAGCTCAATTATCATTAAAGAGATGTAAACATTTCGAATTGGGTGGTGATAAAAAACAAAAAGGTCAAGCTTTACAATTTTAA	151		151	GGTGGTCAAACCAAA	VALID	CCA	Proline
yHKS641_Suhomyces_sp_nov_plate33_SPADES_g002604.m1	4236	ATGGTTAACGTCCCAAAAACTAGAAAGACCTACTGTAAGGGTAAGGAATGTCGTAAACACACCCAACACAAAGTCACCCAATACAAGGCTGGTAAGGCTTCCTTATTCGCTCAAGGTAAGAGAAGATATGACCGTAAACAAAAGGGTTTCGGTGGTCAAACCAAGCCAGTTTTCCACAAGAAAGCCAAGACTACCAAGAAGGTTGTCTTGAGATTGGAATGTGTCGTCTGTAAGACCAAGGCTCAACTTTCCTTAAAGAGATGTAAGCACTTCGAATTGGGTGGTGACAAGAAACAAAAGGGTCAAGCTTTACAATTTTAA	ATGGTTAACGTCCCAAAAACTAGAAAGACCTACTGTAAGGGTAAGGAATGTCGTAAACACACCCAACACAAAGTCACCCAATACAAGGCTGGTAAGGCTTCCTTATTCGCTCAAGGTAAGAGAAGATATGACCGTAAACAAAAGGGTTTCGGTGGTCAAACCAAGCCAGTTTTCCACAAGAAAGCCAAGACTACCAAGAAGGTTGTCTTGAGATTGGAATGTGTCGTCTGTAAGACCAAGGCTCAACTTTCCTTAAAGAGATGTAAGCACTTCGAATTGGGTGGTGACAAGAAACAAAAGGGTCAAGCTTTACAATTTTAA	151		151	GGTGGTCAAACCAAG	VALID	CCA	Proline
yHMPu5000035012_candida_prunicola_160519_g002838.m1	4236	ATGGTTAACGTCCCAAAAACTAGAAAGACCTACTGTAAGGGTAAGGAATGTCGTAAACACACCCAACACAAAGTCACCCAATACAAGGCTGGTAAGGCTTCCTTATTCGCTCAAGGTAAGAGAAGATATGACCGTAAACAAAAGGGTTTCGGTGGTCAAACCAAGCCAGTTTTCCACAAGAAAGCCAAGACTACCAAGAAGGTTGTCTTGAGATTGGAATGTGTCGTCTGTAAGACCAAGGCTCAACTTTCCTTAAAGAGATGTAAGCACTTCGAATTGGGTGGTGACAAGAAACAAAAGGGTCAAGCTTTACAATTTTAA	ATGGTTAACGTCCCAAAAACTAGAAAGACCTACTGTAAGGGTAAGGAATGTCGTAAACACACCCAACACAAAGTCACCCAATACAAGGCTGGTAAGGCTTCCTTATTCGCTCAAGGTAAGAGAAGATATGACCGTAAACAAAAGGGTTTCGGTGGTCAAACCAAGCCAGTTTTCCACAAGAAAGCCAAGACTACCAAGAAGGTTGTCTTGAGATTGGAATGTGTCGTCTGTAAGACCAAGGCTCAACTTTCCTTAAAGAGATGTAAGCACTTCGAATTGGGTGGTGACAAGAAACAAAAGGGTCAAGCTTTACAATTTTAA	151		151	GGTGGTCAAACCAAG	VALID	CCA	Proline
yHMPu5000035031_Candida_kruisii_SPADES_g001026.m1	4236	ATGGTTAACGTTCCAAAGACTAGAAAGACCTACTGTAAGGGTAAGGAATGTCGTAAACACACCCAACACAAGGTTACCCAATATAAGGCTGGTAAGGCTTCCTTGTTTGCCCAAGGTAAGAGAAGATATGACCGTAAACAAAAGGGTTTCGGTGGTCAAACCAAGCCAGTTTTCCACAAGAAGGCCAAGACTACCAAGAAGGTTGTCTTGAGATTGGAATGTGTCGTCTGCAAGACCAAGGCTCAATTGTCCTTGAAGAGATGTAAGCACTTCGAATTGGGTGGTGACAAGAAGCAAAAGGGTCAAGCTTTGCAATTCTAG	ATGGTTAACGTTCCAAAGACTAGAAAGACCTACTGTAAGGGTAAGGAATGTCGTAAACACACCCAACACAAGGTTACCCAATATAAGGCTGGTAAGGCTTCCTTGTTTGCCCAAGGTAAGAGAAGATATGACCGTAAACAAAAGGGTTTCGGTGGTCAAACCAAGCCAGTTTTCCACAAGAAGGCCAAGACTACCAAGAAGGTTGTCTTGAGATTGGAATGTGTCGTCTGCAAGACCAAGGCTCAATTGTCCTTGAAGAGATGTAAGCACTTCGAATTGGGTGGTGACAAGAAGCAAAAGGGTCAAGCTTTGCAATTCTAG	151		151	GGTGGTCAAACCAAG	VALID	CCA	Proline
yHMPu5000035033_candida_cretensis_160519_g004867.m1	4236	ATGGTTAACGTTCCAAAGACTAGAAAGACCTACTGTAAGGGTAAGGAATGTCGTAAACACACCCAACACAAGGTTACCCAATATAAGGCTGGTAAGGCTTCCTTGTTTGCCCAAGGTAAGAGAAGATATGACCGTAAACAAAAGGGTTTCGGTGGTCAAACCAAGCCAGTTTTCCACAAGAAGGCCAAGACTACCAAGAAGGTTGTCTTGAGATTGGAATGTGTCGTCTGCAAGACCAAGGCTCAATTGTCCTTGAAGAGATGTAAGCACTTCGAATTGGGTGGTGACAAGAAGCAAAAGGGTCAAGCTTTGCAATTCTAG	ATGGTTAACGTTCCAAAGACTAGAAAGACCTACTGTAAGGGTAAGGAATGTCGTAAACACACCCAACACAAGGTTACCCAATATAAGGCTGGTAAGGCTTCCTTGTTTGCCCAAGGTAAGAGAAGATATGACCGTAAACAAAAGGGTTTCGGTGGTCAAACCAAGCCAGTTTTCCACAAGAAGGCCAAGACTACCAAGAAGGTTGTCTTGAGATTGGAATGTGTCGTCTGCAAGACCAAGGCTCAATTGTCCTTGAAGAGATGTAAGCACTTCGAATTGGGTGGTGACAAGAAGCAAAAGGGTCAAGCTTTGCAATTCTAG	151		151	GGTGGTCAAACCAAG	VALID	CCA	Proline
yHMPu5000037222_suhomyces_faveliae_210210_g002337.m1	4236	ATGGTTAACGTCCCAAAAACTAGAAAGACCTACTGTAAGGGTAAGGAATGTCGTAAACACACCCAACACAAAGTCACCCAATATAAGGCTGGTAAGGCTTCTTTGTTCGCTCAAGGTAAGAGAAGATATGACCGTAAACAAAAGGGTTTCGGTGGTCAAACCAAGCCAGTTTTCCACAAGAAAGCCAAGACTACCAAGAAGGTTGTCTTGAGATTGGAATGTGTCGTCTGTAAGACCAAGGCTCAACTTTCCTTGAAGAGATGTAAGCACTTCGAATTGGGTGGTGACAAGAAACAAAAGGGTCAAGCTTTACAATTTTAA	ATGGTTAACGTCCCAAAAACTAGAAAGACCTACTGTAAGGGTAAGGAATGTCGTAAACACACCCAACACAAAGTCACCCAATATAAGGCTGGTAAGGCTTCTTTGTTCGCTCAAGGTAAGAGAAGATATGACCGTAAACAAAAGGGTTTCGGTGGTCAAACCAAGCCAGTTTTCCACAAGAAAGCCAAGACTACCAAGAAGGTTGTCTTGAGATTGGAATGTGTCGTCTGTAAGACCAAGGCTCAACTTTCCTTGAAGAGATGTAAGCACTTCGAATTGGGTGGTGACAAGAAACAAAAGGGTCAAGCTTTACAATTTTAA	151		151	GGTGGTCAAACCAAG	VALID	CCA	Proline
yHQL142_Suhomyces_sp_nov_plate33_DISCOVAR_g004471.m1	4236	ATGGTTAACGTTCCAAAAACTAGAAAGACCTACTGTAAGGGTAAGGAATGTCGTAAGCACACCCAACACAAAGTCACTCAATATAAGGCTGGTAAGGCTTCCTTGTTCGCCCAAGGTAAGAGAAGATATGACCGTAAACAAAAGGGTTTCGGTGGTCAAACCAAGCCAGTTTTCCACAAGAAGGCTAAGACTACCAAGAAGGTTGTCTTAAGATTGGAATGTGTCGTCTGCAAGACCAAGGCTCAACTTTCCTTGAAGAGATGTAAGCACTTCGAATTGGGTGGTGACAAGAAACAAAAGGGTCAAGCTTTACAATTTTAA	ATGGTTAACGTTCCAAAAACTAGAAAGACCTACTGTAAGGGTAAGGAATGTCGTAAGCACACCCAACACAAAGTCACTCAATATAAGGCTGGTAAGGCTTCCTTGTTCGCCCAAGGTAAGAGAAGATATGACCGTAAACAAAAGGGTTTCGGTGGTCAAACCAAGCCAGTTTTCCACAAGAAGGCTAAGACTACCAAGAAGGTTGTCTTAAGATTGGAATGTGTCGTCTGCAAGACCAAGGCTCAACTTTCCTTGAAGAGATGTAAGCACTTCGAATTGGGTGGTGACAAGAAACAAAAGGGTCAAGCTTTACAATTTTAA	151		151	GGTGGTCAAACCAAG	VALID	CCA	Proline
yHMPu5000037885_candida_sake_170912_g001798.m1	4236	ATGGTTAACGTTCCAAAAACTAGAAAGACCTACTGTAAAGGTAAGGAATGTCGTAAACACACTCAACACAAGGTTACTCAATACAAGGCTGGTAAGGCTTCCTTGTTTGCCCAAGGTAAGAGAAGATATGACCGTAAACAAAAGGGTTTCGGTGGTCAAACTAAGCCAGTTTTCCACAAGAAAGCCAAGACTACCAAGAAGGTTGTTTTGAGATTGGAATGTGTTGTTTGCAAGACCAAGGCCCAATTATCCTTAAAGAGATGTAAGCACTTCGAATTGGGTGGTGACCGTAAACAAAAGGGTCAAGCTTTACAATTTTAA	ATGGTTAACGTTCCAAAAACTAGAAAGACCTACTGTAAAGGTAAGGAATGTCGTAAACACACTCAACACAAGGTTACTCAATACAAGGCTGGTAAGGCTTCCTTGTTTGCCCAAGGTAAGAGAAGATATGACCGTAAACAAAAGGGTTTCGGTGGTCAAACTAAGCCAGTTTTCCACAAGAAAGCCAAGACTACCAAGAAGGTTGTTTTGAGATTGGAATGTGTTGTTTGCAAGACCAAGGCCCAATTATCCTTAAAGAGATGTAAGCACTTCGAATTGGGTGGTGACCGTAAACAAAAGGGTCAAGCTTTACAATTTTAA	151		151	GGTGGTCAAACTAAG	VALID	CCA	Proline
yHMPu5000035679_candida_rhagii_160613_g004685.m1	4236	ATGGTTAACGTTCCAAAAACTAGAAAGACCTACTGTAAGGGTAAAGAATGTAAAAAACACACCCAACACAAAGTTACCCAATACAAAGCTGGTAAAGCTTCCTTATTTGCCCAAGGTAAAAGAAGATATGACCGTAAACAAAAAGGTTTCGGTGGTCAAACCAAACCAGTTTTCCACAAGAAAGCTAAAACCACCAAGAAGGTTGTTTTAAGATTGGAATGTGTTGTTTGCAAAACCAAAGCTCAATTATCATTAAAGAGATGTAAACATTTCGAATTGGGTGGTGACAAAAAACAAAAAGGTCAAGCTTTACAATTTTAA	ATGGTTAACGTTCCAAAAACTAGAAAGACCTACTGTAAGGGTAAAGAATGTAAAAAACACACCCAACACAAAGTTACCCAATACAAAGCTGGTAAAGCTTCCTTATTTGCCCAAGGTAAAAGAAGATATGACCGTAAACAAAAAGGTTTCGGTGGTCAAACCAAACCAGTTTTCCACAAGAAAGCTAAAACCACCAAGAAGGTTGTTTTAAGATTGGAATGTGTTGTTTGCAAAACCAAAGCTCAATTATCATTAAAGAGATGTAAACATTTCGAATTGGGTGGTGACAAAAAACAAAAAGGTCAAGCTTTACAATTTTAA	151		151	GGTGGTCAAACCAAA	VALID	CCA	Proline
yHMPu5000035680_candida_pseudorhagii_160519_g002338.m1	4236	ATGGTTAACGTTCCAAAAACTAGAAAGACCTACTGTAAGGGTAAAGAATGTAAAAAACACACCCAACACAAAGTTACCCAATACAAAGCTGGTAAAGCTTCCTTATTTGCCCAAGGTAAAAGAAGATATGACCGTAAACAAAAAGGTTTCGGTGGTCAAACCAAACCAGTTTTCCACAAGAAAGCTAAAACCACCAAGAAGGTTGTTTTAAGATTGGAATGTGTTGTTTGCAAAACCAAAGCTCAATTATCATTAAAGAGATGTAAACATTTCGAATTGGGTGGTGACAAAAAACAAAAAGGTCAAGCTTTACAATTTTAA	ATGGTTAACGTTCCAAAAACTAGAAAGACCTACTGTAAGGGTAAAGAATGTAAAAAACACACCCAACACAAAGTTACCCAATACAAAGCTGGTAAAGCTTCCTTATTTGCCCAAGGTAAAAGAAGATATGACCGTAAACAAAAAGGTTTCGGTGGTCAAACCAAACCAGTTTTCCACAAGAAAGCTAAAACCACCAAGAAGGTTGTTTTAAGATTGGAATGTGTTGTTTGCAAAACCAAAGCTCAATTATCATTAAAGAGATGTAAACATTTCGAATTGGGTGGTGACAAAAAACAAAAAGGTCAAGCTTTACAATTTTAA	151		151	GGTGGTCAAACCAAA	VALID	CCA	Proline
yHMPu5000035681_candida_gotoi_160519_g003746.m1	4236	ATGGTTAACGTTCCAAAAACTAGAAAGACCTACTGTAAGGGTAAAGAATGTAAAAAACACACTCAACACAAGGTTACCCAATACAAAGCTGGTAAAGCTTCCTTGTTCGCCCAAGGTAAAAGAAGATATGACCGTAAACAAAAAGGTTTCGGTGGTCAAACTAAACCAGTTTTCCATAAAAAGGCTAAAACTACCAAGAAAGTTGTTTTAAGATTAGAATGTGTTGTTTGTAAGACTAAAGCCCAATTATCATTAAAGAGATGTAAACATTTCGAATTGGGTGGTGACAAAAAACAAAAAGGTCAAGCTTTACAATTTTAA	ATGGTTAACGTTCCAAAAACTAGAAAGACCTACTGTAAGGGTAAAGAATGTAAAAAACACACTCAACACAAGGTTACCCAATACAAAGCTGGTAAAGCTTCCTTGTTCGCCCAAGGTAAAAGAAGATATGACCGTAAACAAAAAGGTTTCGGTGGTCAAACTAAACCAGTTTTCCATAAAAAGGCTAAAACTACCAAGAAAGTTGTTTTAAGATTAGAATGTGTTGTTTGTAAGACTAAAGCCCAATTATCATTAAAGAGATGTAAACATTTCGAATTGGGTGGTGACAAAAAACAAAAAGGTCAAGCTTTACAATTTTAA	151		151	GGTGGTCAAACTAAA	VALID	CCA	Proline
yHQL451_Kodamaea_sp_nov_plate33_SPADES_g001472.m1	4236	ATGGTTAACGTTCCAAAAACTAGAAAGACCTACTGTAAGGGTAGAGAATGTCGTAAGCACACTCAACACAAAGTTACCCAATACAAGGCTGGTAAGGCTTCCTTGTTCGCCCAAGGTAAGAGAAGATATGACCGTAAACAAAAGGGTTTCGGTGGTCAAACCAAGCCAGTTTTCCACAAGAAGGCCAAGACTACCAAGAAGGTTGTCTTGAGATTGGAATGTGTCGTCTGCAAGACCAAGGCTCAATTATCCTTGAAGAGATGTAAGCACTTCGAATTGGGTGGTGACAAGAAGCAAAAGGGTCAAGCTTTGCAATTTTAA	ATGGTTAACGTTCCAAAAACTAGAAAGACCTACTGTAAGGGTAGAGAATGTCGTAAGCACACTCAACACAAAGTTACCCAATACAAGGCTGGTAAGGCTTCCTTGTTCGCCCAAGGTAAGAGAAGATATGACCGTAAACAAAAGGGTTTCGGTGGTCAAACCAAGCCAGTTTTCCACAAGAAGGCCAAGACTACCAAGAAGGTTGTCTTGAGATTGGAATGTGTCGTCTGCAAGACCAAGGCTCAATTATCCTTGAAGAGATGTAAGCACTTCGAATTGGGTGGTGACAAGAAGCAAAAGGGTCAAGCTTTGCAATTTTAA	151		151	GGTGGTCAAACCAAG	VALID	CCA	Proline
yHMPu5000038409_candida_broadrunensis_180604_g001646.m1	4236	ATGGTTAACGTTCCAAAAACTAGAAAGACCTACTGTAAAGGTAAGGAATGCAGAAAGCATACTCAACATAAAGTTACCCAATATAAAGCTGGTAAAGCTTCTTTATTTGCTCAAGGTAAAAGAAGATATGATCGTAAACAAAGAGGTTTTGGTGGTCAAACCAAACCAGTTTTCCATAAAAAGGCTAAGACTACCAAGAAGGTTGTTTTAAGATTAGAATGTATTGTTTGTAAAACTAAAGCTCAATTATCATTAAAGAGATGTAAACATTTCGAATTAGGTGGTGATAAAAAACAAAAAGGTCAAGCTTTACAATTTTAA	ATGGTTAACGTTCCAAAAACTAGAAAGACCTACTGTAAAGGTAAGGAATGCAGAAAGCATACTCAACATAAAGTTACCCAATATAAAGCTGGTAAAGCTTCTTTATTTGCTCAAGGTAAAAGAAGATATGATCGTAAACAAAGAGGTTTTGGTGGTCAAACCAAACCAGTTTTCCATAAAAAGGCTAAGACTACCAAGAAGGTTGTTTTAAGATTAGAATGTATTGTTTGTAAAACTAAAGCTCAATTATCATTAAAGAGATGTAAACATTTCGAATTAGGTGGTGATAAAAAACAAAAAGGTCAAGCTTTACAATTTTAA	151		151	GGTGGTCAAACCAAA	VALID	CCA	Proline
yHMPu5000041788_scheffersomyces_coipomoensis_180604_g001794.m1	4236	ATGGTTAACGTTCCAAAAACCAGAAAGACCTACTGTAAAGGTAAGGAATGCAGAAAACACACCCAACATAAGGTTACCCAATATAAAGCTGGTAAAGCTTCTTTATTTGCCCAAGGTAAAAGAAGATATGACCGTAAACAAAGAGGTTTCGGTGGTCAAACTAAACCAGTTTTCCATAAAAAGGCTAAAACTACCAAGAAAGTTGTTTTAAGATTAGAATGTGTTGTTTGTAAGACTAAAGCTCAATTATCATTAAAGAGATGTAAACATTTCGAATTAGGTGGTGATAAAAAACAAAAAGGTCAAGCTTTACAATTTTAA	ATGGTTAACGTTCCAAAAACCAGAAAGACCTACTGTAAAGGTAAGGAATGCAGAAAACACACCCAACATAAGGTTACCCAATATAAAGCTGGTAAAGCTTCTTTATTTGCCCAAGGTAAAAGAAGATATGACCGTAAACAAAGAGGTTTCGGTGGTCAAACTAAACCAGTTTTCCATAAAAAGGCTAAAACTACCAAGAAAGTTGTTTTAAGATTAGAATGTGTTGTTTGTAAGACTAAAGCTCAATTATCATTAAAGAGATGTAAACATTTCGAATTAGGTGGTGATAAAAAACAAAAAGGTCAAGCTTTACAATTTTAA	151		151	GGTGGTCAAACTAAA	VALID	CCA	Proline
yHQL527_Metschnikowia_sp_nov_plate33_SPADES_g004359.m1	4236	ATGGTTAACGTCCCAAAAACTAGAAAGACCTTCTGCAAAGGTAAAGAATGTCGTAAACACACTCAACATAAAGTTACCCAATACAAGGCTGGTAAAGCTTCCTTATTCGCTCAAGGTAAGAGAAGATATGACCGTAAACAAAAGGGTTACGGTGGTCAAACCAAACCAGTTTTCCATAAAAAAGCTAAAACTACCAAAAAAGTTGTTTTAAGATTGGAATGTGTTGTTTGTAAAACTAAAGCTCAATTATCTTTAAAGAGATGTAAGCACTTCGAATTGGGTGGTGACAAAAAACAAAAAGGTCAAGCTTTACAATTTTAA	ATGGTTAACGTCCCAAAAACTAGAAAGACCTTCTGCAAAGGTAAAGAATGTCGTAAACACACTCAACATAAAGTTACCCAATACAAGGCTGGTAAAGCTTCCTTATTCGCTCAAGGTAAGAGAAGATATGACCGTAAACAAAAGGGTTACGGTGGTCAAACCAAACCAGTTTTCCATAAAAAAGCTAAAACTACCAAAAAAGTTGTTTTAAGATTGGAATGTGTTGTTTGTAAAACTAAAGCTCAATTATCTTTAAAGAGATGTAAGCACTTCGAATTGGGTGGTGACAAAAAACAAAAAGGTCAAGCTTTACAATTTTAA	151		151	GGTGGTCAAACCAAA	VALID	CCA	Proline
yHMPu5000035333_candida_silvanorum_170713_g002501.m1	4236	ATGGTTAACGTCCCAAAGACCAGAAAGACCTACTGTAAAGGTAAAGATTGCCGTAAACACACCCAACACAAGGTTACCCAATACAAGGCTGGTAAAGCTTCTTTATTCGCTCAAGGTAAGAGAAGATATGACCGTAAACAAAAAGGTTATGGTGGTCAAACCAAGCCAGTTTTCCACAAAAAGGCTAAGACTACCAAGAAGGTTGTTTTAAGATTAGAATGTGTTGTCTGCAAAACCAAAGCTCAATTATCTTTAAAGAGATGTAAGCACTTCGAATTGGGTGGTGACAAGAAACAAAAAGGTCAAGCTTTACAATTTTAA	ATGGTTAACGTCCCAAAGACCAGAAAGACCTACTGTAAAGGTAAAGATTGCCGTAAACACACCCAACACAAGGTTACCCAATACAAGGCTGGTAAAGCTTCTTTATTCGCTCAAGGTAAGAGAAGATATGACCGTAAACAAAAAGGTTATGGTGGTCAAACCAAGCCAGTTTTCCACAAAAAGGCTAAGACTACCAAGAAGGTTGTTTTAAGATTAGAATGTGTTGTCTGCAAAACCAAAGCTCAATTATCTTTAAAGAGATGTAAGCACTTCGAATTGGGTGGTGACAAGAAACAAAAAGGTCAAGCTTTACAATTTTAA	151		151	GGTGGTCAAACCAAG	VALID	CCA	Proline
yHMPu5000035314_candida_anglica_160928_g004854.m1	4236	ATGGTTAACGTTCCAAAAGTCAGAAAGACCTACTGTAAGGGTAAGGAATGTCGTAAGCACACCCAACACAAGGTTACCCAATACAAGGCCGGTAAGGCTTCTTTGTTTGCCCAAGGTAAGAGAAGATATGACCGTAAGCAAAAGGGTTACGGTGGTCAAACCAAGCCAGTTTTCCACAAGAAGGCTAAGACTACCAAGAAGGTTGTCTTGAGATTGGAATGTGTTGTTTGCAAGACCAAGGCTCAATTGTCCTTGAAGAGATGTAAGCACTTCGAATTGGGTGGTGACAAGAAGCAAAAGGGTCAAGCCTTGCAATTTTAA	ATGGTTAACGTTCCAAAAGTCAGAAAGACCTACTGTAAGGGTAAGGAATGTCGTAAGCACACCCAACACAAGGTTACCCAATACAAGGCCGGTAAGGCTTCTTTGTTTGCCCAAGGTAAGAGAAGATATGACCGTAAGCAAAAGGGTTACGGTGGTCAAACCAAGCCAGTTTTCCACAAGAAGGCTAAGACTACCAAGAAGGTTGTCTTGAGATTGGAATGTGTTGTTTGCAAGACCAAGGCTCAATTGTCCTTGAAGAGATGTAAGCACTTCGAATTGGGTGGTGACAAGAAGCAAAAGGGTCAAGCCTTGCAATTTTAA	151		151	GGTGGTCAAACCAAG	VALID	CCA	Proline
yHMPu5000037928_candida_argentea_180604.haplomerger2_g001910.m1	4236	ATGGTTAACGTTCCCAAGACCAGAAAGACCTACTGCAAGGGTAAGGAGTGCCGCAAGCACACCCAGCACAAGGTGACTCAGTACAAGGCCGGTAAGGCTTCCGTCTTCGCCCAGGGTAAGAGAAGATATGACCGTAAGCAGAAGGGTTACGGTGGTCAAACCAAGCCCGTTTTCCACAAGAAGGCCAAGACCACCAAGAAGGTTGTCTTGAGATTGGAGTGCATCGTCTGCAAGACCAAGGCTCAATTGTCCTTGAAGAGATGCAAGCACTTCGAGTTGGGTGGTGACAAGAAACAGAAGGGCCAAGCCTTACAGTTTTAA	ATGGTTAACGTTCCCAAGACCAGAAAGACCTACTGCAAGGGTAAGGAGTGCCGCAAGCACACCCAGCACAAGGTGACTCAGTACAAGGCCGGTAAGGCTTCCGTCTTCGCCCAGGGTAAGAGAAGATATGACCGTAAGCAGAAGGGTTACGGTGGTCAAACCAAGCCCGTTTTCCACAAGAAGGCCAAGACCACCAAGAAGGTTGTCTTGAGATTGGAGTGCATCGTCTGCAAGACCAAGGCTCAATTGTCCTTGAAGAGATGCAAGCACTTCGAGTTGGGTGGTGACAAGAAACAGAAGGGCCAAGCCTTACAGTTTTAA	151		151	GGTGGTCAAACCAAG	VALID	CCC	Proline
yHMPu5000038375_candida_khmerensis_170713_g003210.m1	4236	ATGGTTAACGTTCCAAAGACTAGAAAGACCTACTGTAAAGGTAAGGCTTGTCGTAAACACACCCAACACAAAGTTACCCAATATAAAGCTGGTAAAGCTTCTTTATTCGCTCAAGGTAAAAGAAGATATGACCGTAAACAAAAAGGTTACGGTGGTCAAACCAAACCAGTTTTCCATAAAAAGGCTAAAACTACCAAAAAAGTTGTTTTAAGATTAGAATGTGTTGTTTGTAAAACTAAAGCTCAATTAAGTTTAAAGAGATGTAAACATTTCGAATTGGGTGGTGATAAAAAACAAAAAGGTCAAGCCTTACAATTCTAA	ATGGTTAACGTTCCAAAGACTAGAAAGACCTACTGTAAAGGTAAGGCTTGTCGTAAACACACCCAACACAAAGTTACCCAATATAAAGCTGGTAAAGCTTCTTTATTCGCTCAAGGTAAAAGAAGATATGACCGTAAACAAAAAGGTTACGGTGGTCAAACCAAACCAGTTTTCCATAAAAAGGCTAAAACTACCAAAAAAGTTGTTTTAAGATTAGAATGTGTTGTTTGTAAAACTAAAGCTCAATTAAGTTTAAAGAGATGTAAACATTTCGAATTGGGTGGTGATAAAAAACAAAAAGGTCAAGCCTTACAATTCTAA	151		151	GGTGGTCAAACCAAA	VALID	CCA	Proline
yHMPu5000035706_candida_mogii_160613_g001797.m1	4236	ATGGTTAACGTTCCAAAGACCAGAAAGACATACTGTAAGGGCAAGGACTGCAAGAAGCACACCCAACACAAGGTCACCCAATACAAGGCTGGTAAGGCTTCCTTGTTTGCCCAGGGTAAGAGAAGATACGACCGTAAGCAGAGAGGTTACGGTGGTCAGACCAAGCCAGTTTTCCACAAGAAGGCCAAGACCACCAAGAAGGTTGTGTTGAGATTGGAGTGTGTTGTTTGCAAGACCAAGGCTCAGTTGTCCCTCAAGAGATGCAAGCACTTTGAGTTGGGTGGTGACAAGAAGCAGAAGGGCCAGGCTTTGCAGTTCTAA	ATGGTTAACGTTCCAAAGACCAGAAAGACATACTGTAAGGGCAAGGACTGCAAGAAGCACACCCAACACAAGGTCACCCAATACAAGGCTGGTAAGGCTTCCTTGTTTGCCCAGGGTAAGAGAAGATACGACCGTAAGCAGAGAGGTTACGGTGGTCAGACCAAGCCAGTTTTCCACAAGAAGGCCAAGACCACCAAGAAGGTTGTGTTGAGATTGGAGTGTGTTGTTTGCAAGACCAAGGCTCAGTTGTCCCTCAAGAGATGCAAGCACTTTGAGTTGGGTGGTGACAAGAAGCAGAAGGGCCAGGCTTTGCAGTTCTAA	#VALUE!	151	#VALUE!	#VALUE!	#VALUE!	#VALUE!	#VALUE!
yHMPu5000041838_candida_tolerans_180604_g003169.m1	4236	ATGGTTAACGTCCCAAAGACCAGAAAGACATACTGTAAGGGCAAGGAGTGCAAAAAGCACACCCAACACAAGGTCACTCAGTACAAGGCTGGTAAGGCCTCCTTGTTCGCCCAAGGTAAGAGAAGATACGACCGTAAGCAGAGAGGTTACGGTGGTCAAACCAAGCCAGTTTTCCACAAGAAGGCTAAGACTACCAAGAAGGTGGTTTTGAGATTGGAATGTGTTGTTTGCAAGACCAAGGCTCAATTGTCTCTTAAGAGATGTAAGCACTTCGAGTTGGGTGGTGACAAGAAGCAAAAGGGCCAAGCTTTGCAATTTTAA	ATGGTTAACGTCCCAAAGACCAGAAAGACATACTGTAAGGGCAAGGAGTGCAAAAAGCACACCCAACACAAGGTCACTCAGTACAAGGCTGGTAAGGCCTCCTTGTTCGCCCAAGGTAAGAGAAGATACGACCGTAAGCAGAGAGGTTACGGTGGTCAAACCAAGCCAGTTTTCCACAAGAAGGCTAAGACTACCAAGAAGGTGGTTTTGAGATTGGAATGTGTTGTTTGCAAGACCAAGGCTCAATTGTCTCTTAAGAGATGTAAGCACTTCGAGTTGGGTGGTGACAAGAAGCAAAAGGGCCAAGCTTTGCAATTTTAA	151		151	GGTGGTCAAACCAAG	VALID	CCA	Proline
yHMPu5000037248_nematodospora_valgi_210210_g002533.m1	4236	ATGGTTAACGTTCCAAAGACTAGAAAGACCTACTGTAAAGGTAGAGAATGTCGTAAACACACTCAACACAAAGTCACCCAATATAAAGCTGGTAGAGCTTCATTATTCGCTCAAGGTAAGAGAAGATATGACAGAAAACAATCAGGTTACGGTGGTCAAACTAAACCAGTTTTCCACAAGAAAGCTAAGACAACTAAAAAAGTTGTTTTAAGATTGGAATGTGTTGTTTGTAAAACTAAAGCTCAATTATCATTGAAGAGATGTAAACATTTCGAATTGGGTGGTGATAAAAAACAAAAAGGTCAAGCTTTACAATTTTAA	ATGGTTAACGTTCCAAAGACTAGAAAGACCTACTGTAAAGGTAGAGAATGTCGTAAACACACTCAACACAAAGTCACCCAATATAAAGCTGGTAGAGCTTCATTATTCGCTCAAGGTAAGAGAAGATATGACAGAAAACAATCAGGTTACGGTGGTCAAACTAAACCAGTTTTCCACAAGAAAGCTAAGACAACTAAAAAAGTTGTTTTAAGATTGGAATGTGTTGTTTGTAAAACTAAAGCTCAATTATCATTGAAGAGATGTAAACATTTCGAATTGGGTGGTGATAAAAAACAAAAAGGTCAAGCTTTACAATTTTAA	151		151	GGTGGTCAAACTAAA	VALID	CCA	Proline
yHMPu5000035254_wickerhamomyces_pijperi_160928.haplomerger2_g000088.m1	4236	ATGGTTAACGTTCCAAAAGTTAGAAAGACTTACTGTAAGGGTAAGGAATGTCGTAAACACACTCAACACAAGGTTACCCAATACAAGGCCGGTAAGGCTTCCTTATTCGCTCAAGGTAAGAGAAGATATGACCGTAAGCAATCCGGTTTCGGTGGTCAAACCAAGCCAGTTTTCCACAAGAAGGCTAAGACTACCAAGAAGGTTGTTTTACGTTTAGAATGTGTTGTCTGTAAGACCAAGGCTCAATTAGCTTTAAAGAGATGTAAGCACTTCGAATTAGGTGGTGACAAGAAGCAAAAGGGTCAAGCCTTACAATTCTAA	ATGGTTAACGTTCCAAAAGTTAGAAAGACTTACTGTAAGGGTAAGGAATGTCGTAAACACACTCAACACAAGGTTACCCAATACAAGGCCGGTAAGGCTTCCTTATTCGCTCAAGGTAAGAGAAGATATGACCGTAAGCAATCCGGTTTCGGTGGTCAAACCAAGCCAGTTTTCCACAAGAAGGCTAAGACTACCAAGAAGGTTGTTTTACGTTTAGAATGTGTTGTCTGTAAGACCAAGGCTCAATTAGCTTTAAAGAGATGTAAGCACTTCGAATTAGGTGGTGACAAGAAGCAAAAGGGTCAAGCCTTACAATTCTAA	151		151	GGTGGTCAAACCAAG	VALID	CCA	Proline
yHMPu5000035708_candida_flosculorum_160613.haplomerger2_g000086.m1	4236	ATGGTTAACGTCCCAAAAGTTAGAAAGACTTACTGTAAGGGTAAGGAATGTCGTAAACACACCCAACACAAGGTTACCCAATACAAGGCCGGTAAGGCTTCCTTATTCGCTCAAGGTAAGAGAAGATATGACCGTAAGCAATCCGGTTTTGGTGGTCAAACCAAGCCAGTTTTCCACAAGAAGGCTAAGACTACCAAGAAGGTCGTTTTACGTTTAGAATGTGTCGTCTGTAAGACTAAGGCTCAATTAGCTTTAAAGAGATGTAAGCACTTCGAATTAGGTGGTGACAAGAAGCAAAAGGGTCAAGCCTTACAATTCTAA	ATGGTTAACGTCCCAAAAGTTAGAAAGACTTACTGTAAGGGTAAGGAATGTCGTAAACACACCCAACACAAGGTTACCCAATACAAGGCCGGTAAGGCTTCCTTATTCGCTCAAGGTAAGAGAAGATATGACCGTAAGCAATCCGGTTTTGGTGGTCAAACCAAGCCAGTTTTCCACAAGAAGGCTAAGACTACCAAGAAGGTCGTTTTACGTTTAGAATGTGTCGTCTGTAAGACTAAGGCTCAATTAGCTTTAAAGAGATGTAAGCACTTCGAATTAGGTGGTGACAAGAAGCAAAAGGGTCAAGCCTTACAATTCTAA	151		151	GGTGGTCAAACCAAG	VALID	CCA	Proline
yHMPu5000038049_wickerhamomyces_xylosica_180604_g003864.m1	4236	ATGGTTAACGTCCCAAAAGTTAGAAAGACCTACTGTAAAGGTAAGGAATGCCGTAAGCACACCCAACACAAGGTTACCCAATACAAGGCCGGTAAGGCTTCTTTATTCGCTCAAGGTAAGAGAAGATATGACCGTAAGCAATCCGGTTTCGGTGGTCAAACCAAGCCAGTTTTCCACAAGAAGGCTAAGACTACCAAGAAGGTCGTTTTACGTTTAGAATGTGTTGTCTGTAAGACCAAGGCTCAATTAGCTTTGAAGAGATGTAAGCACTTCGAATTAGGTGGTGACAAGAAGCAAAAGGGTCAAGCCTTACAATTCTAA	ATGGTTAACGTCCCAAAAGTTAGAAAGACCTACTGTAAAGGTAAGGAATGCCGTAAGCACACCCAACACAAGGTTACCCAATACAAGGCCGGTAAGGCTTCTTTATTCGCTCAAGGTAAGAGAAGATATGACCGTAAGCAATCCGGTTTCGGTGGTCAAACCAAGCCAGTTTTCCACAAGAAGGCTAAGACTACCAAGAAGGTCGTTTTACGTTTAGAATGTGTTGTCTGTAAGACCAAGGCTCAATTAGCTTTGAAGAGATGTAAGCACTTCGAATTAGGTGGTGACAAGAAGCAAAAGGGTCAAGCCTTACAATTCTAA	151		151	GGTGGTCAAACCAAG	VALID	CCA	Proline
yHMPu5000038316_wickerhamomyces_chaumierensis_170713.haplomerger2_g002147.m1	4236	ATGGTTAACGTCCCAAAAGTTAGAAAGACTTACTGTAAGGGTAAGGAATGTCGTAAACACACCCAACACAAGGTTACCCAATACAAGGCCGGTAAGGCTTCCTTATTCGCTCAAGGTAAGAGAAGATATGACCGTAAGCAATCCGGTTTCGGTGGTCAAACCAAGCCAGTTTTCCACAAGAAGGCTAAGACTACCAAGAAGGTCGTTTTACGTTTAGAATGTGTCGTCTGTAAGACTAAGGCTCAATTAGCTTTAAAGAGATGTAAGCACTTCGAATTAGGTGGTGACAAGAAGCAAAAGGGTCAAGCCTTACAATTCTAA	ATGGTTAACGTCCCAAAAGTTAGAAAGACTTACTGTAAGGGTAAGGAATGTCGTAAACACACCCAACACAAGGTTACCCAATACAAGGCCGGTAAGGCTTCCTTATTCGCTCAAGGTAAGAGAAGATATGACCGTAAGCAATCCGGTTTCGGTGGTCAAACCAAGCCAGTTTTCCACAAGAAGGCTAAGACTACCAAGAAGGTCGTTTTACGTTTAGAATGTGTCGTCTGTAAGACTAAGGCTCAATTAGCTTTAAAGAGATGTAAGCACTTCGAATTAGGTGGTGACAAGAAGCAAAAGGGTCAAGCCTTACAATTCTAA	151		151	GGTGGTCAAACCAAG	VALID	CCA	Proline
yHMPu5000035263_Candida_solani_SPADES_g013643.m1	4236	ATGCAAAACGAGTTCTCTCCATTCAAGTTATGCTCAATGTCCAAAAAGTTCGAAAGTCATCTCATTTCTCCAAGAGCCAGTAAACCAGTCTGTGAGAACTCCCAAGATCCATGTCAATTAGAGTCACAAGATACTAACAATGTCATTATAGTTAACGTTCCAAAAGTCAGAAAGACCTACTGTAAAGGTAAAGAATGTCGTAAACACACTCAACACAAGGTTACCCAATACAAAGCCGGTAAAGCTTCCTTATTCGCTCAAGGTAAGAGAAGATATGACCGTAAACAATCCGGTTTCGGTGGTCAAACCAAGCCAGTTTTCCACAAAAAGGCTAAGACTACCAAGAAGGTCGTTTTACGTTTAGAATGTGTTGTCTGTAAGACCAAAGCTCAATTAGCT…	ATGCAAAACGAGTTCTCTCCATTCAAGTTATGCTCAATGTCCAAAAAGTTCGAAAGTCATCTCATTTCTCCAAGAGCCAGTAAACCAGTCTGTGAGAACTCCCAAGATCCATGTCAATTAGAGTCACAAGATACTAACAATGTCATTATAGTTAACGTTCCAAAAGTCAGAAAGACCTACTGTAAAGGTAAAGAATGTCGTAAACACACTCAACACAAGGTTACCCAATACAAAGCCGGTAAAGCTTCCTTATTCGCTCAAGGTAAGAGAAGATATGACCGTAAACAATCCGGTTTCGGTGGTCAAACCAAGCCAGTTTTCCACAAAAAGGCTAAGACTACCAAGAAGGTCGTTTTACGTTTAGAATGTGTTGTCTGTAAGACCAAAGCTCAATTAGCT…	298		298	GGTGGTCAAACCAAG	VALID	CCA	Proline
yHMPu5000038062_candida_wangnamkhiaoensis_170912_g001146.m1	4236	ATGGTTAACGTTCCAAAAACTAGAAAGACCTACTGTAAGGGTAAAGAATGTCGTAAACACACCCAACACAAAGTTACCCAATACAAAGCCGGTAAAGCTTCTTTATTCGCTCAAGGTAAGAGAAGATATGACCGTAAACAAAGAGGTTACGGTGGTCAAACCAAACCAGTTTTCCACAAGAAAGCTAAGACTACCAAAAAGGTTGTTTTAAGATTGGAATGTGTTGTTTGCAAAACCAAGGCTCAATTACGTTTGAAGAGATGTAAACATTTCGAATTGGGTGGTGACAAGAAACAAAAAGGTCAAGCCTTACAATTCTAA	ATGGTTAACGTTCCAAAAACTAGAAAGACCTACTGTAAGGGTAAAGAATGTCGTAAACACACCCAACACAAAGTTACCCAATACAAAGCCGGTAAAGCTTCTTTATTCGCTCAAGGTAAGAGAAGATATGACCGTAAACAAAGAGGTTACGGTGGTCAAACCAAACCAGTTTTCCACAAGAAAGCTAAGACTACCAAAAAGGTTGTTTTAAGATTGGAATGTGTTGTTTGCAAAACCAAGGCTCAATTACGTTTGAAGAGATGTAAACATTTCGAATTGGGTGGTGACAAGAAACAAAAAGGTCAAGCCTTACAATTCTAA	151		151	GGTGGTCAAACCAAA	VALID	CCA	Proline
yHMPu5000035028_candida_tritomae_160519_g001988.m1	4236	ATGGTTAACGTTCCAAAGACTAGAAAGACCTACTGCAAGGGTAAGGAATGTCGTAAACACACCCAACACAAGGTTACCCAATATAAGGCTGGTAAGGCTTCCTTGTTTGCTCAAGGTAAGAGAAGATATGACCGTAAGCAATCCGGTTTCGGTGGTCAAACCAAGCCAGTTTTCCAAAAGAAGGCCAAGACCACCAAGAAGGTTGTTTTGAGATTGGAATGTGTTGTTTGCAAGACCAAGGCTCAATTGTCCTTGAAGAGATGTAAGCACTTTGAATTGGGTGGTGACAAGAAGCAAAAGGGTCAAGCTTTGCAATTCTAG	ATGGTTAACGTTCCAAAGACTAGAAAGACCTACTGCAAGGGTAAGGAATGTCGTAAACACACCCAACACAAGGTTACCCAATATAAGGCTGGTAAGGCTTCCTTGTTTGCTCAAGGTAAGAGAAGATATGACCGTAAGCAATCCGGTTTCGGTGGTCAAACCAAGCCAGTTTTCCAAAAGAAGGCCAAGACCACCAAGAAGGTTGTTTTGAGATTGGAATGTGTTGTTTGCAAGACCAAGGCTCAATTGTCCTTGAAGAGATGTAAGCACTTTGAATTGGGTGGTGACAAGAAGCAAAAGGGTCAAGCTTTGCAATTCTAG	151		151	GGTGGTCAAACCAAG	VALID	CCA	Proline
yHMPu5000035030_Candida_lycoperdinae__SPADES_g002162.m1	4236	ATGGTTAACGTTCCAAAGACTAGAAAGACCTACTGCAAGGGTAAGGAATGTCGTAAACACACCCAACACAAGGTTACCCAATATAAGGCTGGTAAGGCTTCCTTGTTTGCTCAAGGTAAGAGAAGATATGACCGTAAGCAATCCGGTTTCGGTGGTCAAACCAAGCCAGTTTTCCAAAAGAAGGCCAAGACCACCAAGAAGGTCGTTTTGAGATTGGAATGTGTTGTTTGCAAGACCAAGGCTCAATTGTCCTTGAAGAGATGTAAGCACTTTGAATTGGGTGGTGACAAGAAGCAAAAGGGTCAAGCTTTGCAATTCTAG	ATGGTTAACGTTCCAAAGACTAGAAAGACCTACTGCAAGGGTAAGGAATGTCGTAAACACACCCAACACAAGGTTACCCAATATAAGGCTGGTAAGGCTTCCTTGTTTGCTCAAGGTAAGAGAAGATATGACCGTAAGCAATCCGGTTTCGGTGGTCAAACCAAGCCAGTTTTCCAAAAGAAGGCCAAGACCACCAAGAAGGTCGTTTTGAGATTGGAATGTGTTGTTTGCAAGACCAAGGCTCAATTGTCCTTGAAGAGATGTAAGCACTTTGAATTGGGTGGTGACAAGAAGCAAAAGGGTCAAGCTTTGCAATTCTAG	151		151	GGTGGTCAAACCAAG	VALID	CCA	Proline
yHMPu5000035032_candida_gatunensis_160519_g000325.m1	4236	ATGGTTAACGTTCCAAAGACTAGAAAGACCTACTGCAAGGGTAAGGAATGTCGTAAACACACCCAACACAAGGTTACCCAATATAAGGCTGGTAAGGCTTCTTTGTTTGCCCAAGGTAAGAGAAGATATGACCGTAAGCAATCCGGTTTCGGTGGTCAAACCAAGCCAGTTTTCCAAAAGAAGGCTAAGACTACCAAGAAGGTTGTCTTGAGATTGGAATGTGTTGTCTGCAAGACCAAGGCTCAATTGTCTTTGAAGAGATGTAAGCACTTCGAATTGGGTGGTGACAAGAAGCAAAAGGGTCAAGCTTTGCAATTCTAG	ATGGTTAACGTTCCAAAGACTAGAAAGACCTACTGCAAGGGTAAGGAATGTCGTAAACACACCCAACACAAGGTTACCCAATATAAGGCTGGTAAGGCTTCTTTGTTTGCCCAAGGTAAGAGAAGATATGACCGTAAGCAATCCGGTTTCGGTGGTCAAACCAAGCCAGTTTTCCAAAAGAAGGCTAAGACTACCAAGAAGGTTGTCTTGAGATTGGAATGTGTTGTCTGCAAGACCAAGGCTCAATTGTCTTTGAAGAGATGTAAGCACTTCGAATTGGGTGGTGACAAGAAGCAAAAGGGTCAAGCTTTGCAATTCTAG	151		151	GGTGGTCAAACCAAG	VALID	CCA	Proline
yHMPu5000035034_candida_barrocoloradensis_160519_g004832.m1	4236	ATGGTTAACGTTCCAAAGACTAGAAAGACCTACTGCAAGGGTAAGGAATGTCGTAAACACACCCAACACAAGGTTACCCAATATAAGGCTGGTAAGGCTTCTTTGTTTGCCCAAGGTAAGAGAAGATATGACCGTAAGCAGTCCGGTTTCGGTGGTCAAACCAAGCCAGTTTTCCAAAAGAAGGCTAAGACTACCAAGAAGGTTGTCTTGAGATTGGAATGTGTTGTCTGCAAGACCAAGGCTCAATTGTCTTTGAAGAGATGTAAGCACTTCGAATTAGGTGGTGACAAGAAGCAAAAGGGTCAAGCTTTGCAATTCTAG	ATGGTTAACGTTCCAAAGACTAGAAAGACCTACTGCAAGGGTAAGGAATGTCGTAAACACACCCAACACAAGGTTACCCAATATAAGGCTGGTAAGGCTTCTTTGTTTGCCCAAGGTAAGAGAAGATATGACCGTAAGCAGTCCGGTTTCGGTGGTCAAACCAAGCCAGTTTTCCAAAAGAAGGCTAAGACTACCAAGAAGGTTGTCTTGAGATTGGAATGTGTTGTCTGCAAGACCAAGGCTCAATTGTCTTTGAAGAGATGTAAGCACTTCGAATTAGGTGGTGACAAGAAGCAAAAGGGTCAAGCTTTGCAATTCTAG	151		151	GGTGGTCAAACCAAG	VALID	CCA	Proline
yHMPu5000035035_candida_atbi_160519_g004586.m1	4236	ATGGTTAACGTTCCAAAGACTAGAAAGACCTACTGCAAGGGTAAGGAATGTCGTAAACACACTCAACACAAGGTTACCCAATATAAGGCTGGTAAGGCTTCTTTGTTTGCCCAAGGTAAGAGAAGATATGACCGTAAGCAATCCGGTTTCGGTGGTCAAACCAAGCCAGTTTTCCAAAAGAAGGCCAAGACTACCAAGAAGGTTGTCTTGAGATTGGAATGTGTTGTCTGTAAGACCAAGGCTCAATTGTCTTTGAAGAGATGTAAGCACTTCGAATTGGGTGGTGACAAGAAGCAAAAGGGTCAAGCTTTGCAATTCTAG	ATGGTTAACGTTCCAAAGACTAGAAAGACCTACTGCAAGGGTAAGGAATGTCGTAAACACACTCAACACAAGGTTACCCAATATAAGGCTGGTAAGGCTTCTTTGTTTGCCCAAGGTAAGAGAAGATATGACCGTAAGCAATCCGGTTTCGGTGGTCAAACCAAGCCAGTTTTCCAAAAGAAGGCCAAGACTACCAAGAAGGTTGTCTTGAGATTGGAATGTGTTGTCTGTAAGACCAAGGCTCAATTGTCTTTGAAGAGATGTAAGCACTTCGAATTGGGTGGTGACAAGAAGCAAAAGGGTCAAGCTTTGCAATTCTAG	151		151	GGTGGTCAAACCAAG	VALID	CCA	Proline
yHMPu5000037892_candida_pallodes_170210_g004366.m1	4236	ATGGTTAACGTTCCAAAGACTAGAAAGACCTACTGCAAGGGTAAGGAATGTCGTAAACACACCCAACACAAGGTTACCCAATATAAGGCTGGTAAGGCTTCCTTGTTTGCTCAAGGTAAGAGAAGATATGACCGTAAGCAATCCGGTTTCGGTGGTCAAACCAAGCCAGTTTTCCAAAAGAAGGCCAAGACCACCAAGAAGGTTGTCTTGAGATTGGAATGTGTTGTTTGCAAGACCAAGGCTCAATTGTCCTTGAAGAGATGTAAGCACTTTGAATTGGGTGGTGACAAGAAGCAAAAGGGTCAAGCTTTGCAATTCTAG	ATGGTTAACGTTCCAAAGACTAGAAAGACCTACTGCAAGGGTAAGGAATGTCGTAAACACACCCAACACAAGGTTACCCAATATAAGGCTGGTAAGGCTTCCTTGTTTGCTCAAGGTAAGAGAAGATATGACCGTAAGCAATCCGGTTTCGGTGGTCAAACCAAGCCAGTTTTCCAAAAGAAGGCCAAGACCACCAAGAAGGTTGTCTTGAGATTGGAATGTGTTGTTTGCAAGACCAAGGCTCAATTGTCCTTGAAGAGATGTAAGCACTTTGAATTGGGTGGTGACAAGAAGCAAAAGGGTCAAGCTTTGCAATTCTAG	151		151	GGTGGTCAAACCAAG	VALID	CCA	Proline
yHMPu5000037925_candida_aglyptinia_170210_g002508.m1	4236	ATGGTTAACGTTCCAAAGACTAGAAAGACCTACTGCAAGGGTAAGGAATGTCGTAAACACACCCAACACAAGGTTACCCAATATAAAGCTGGTAAGGCTTCTTTGTTTGCCCAAGGTAAGAGAAGATATGACCGTAAGCAATCCGGTTTCGGTGGTCAAACCAAGCCAGTTTTCCAAAAGAAGGCTAAGACTACCAAGAAGGTTGTCTTGAGATTGGAATGTGTTGTCTGCAAGACCAAGGCTCAATTGTCTTTGAAGAGATGTAAGCACTTCGAATTGGGTGGTGACAAGAAGCAAAAGGGTCAAGCTTTGCAATTCTAG	ATGGTTAACGTTCCAAAGACTAGAAAGACCTACTGCAAGGGTAAGGAATGTCGTAAACACACCCAACACAAGGTTACCCAATATAAAGCTGGTAAGGCTTCTTTGTTTGCCCAAGGTAAGAGAAGATATGACCGTAAGCAATCCGGTTTCGGTGGTCAAACCAAGCCAGTTTTCCAAAAGAAGGCTAAGACTACCAAGAAGGTTGTCTTGAGATTGGAATGTGTTGTCTGCAAGACCAAGGCTCAATTGTCTTTGAAGAGATGTAAGCACTTCGAATTGGGTGGTGACAAGAAGCAAAAGGGTCAAGCTTTGCAATTCTAG	151		151	GGTGGTCAAACCAAG	VALID	CCA	Proline
yHMPu5000038318_teunomyces_stri_170713_g004297.m1	4236	ATGGTTAACGTTCCAAAGACTAGAAAGACCTACTGCAAGGGTAAGGAATGTCGTAAACACACCCAACACAAGGTTACCCAATATAAGGCTGGTAAGGCTTCCTTGTTTGCCCAAGGTAAGAGAAGATATGACCGTAAGCAATCAGGTTTCGGTGGTCAAACCAAGCCAGTTTTCCAAAAGAAGGCTAAGACTACCAAGAAGGTTGTCTTGAGATTGGAATGTGTTGTCTGCAAGACAAAGGCTCAATTGTCTTTGAAGAGATGTAAGCACTTCGAATTGGGTGGTGACAAGAAGCAAAAGGGTCAAGCTTTGCAATTCTAG	ATGGTTAACGTTCCAAAGACTAGAAAGACCTACTGCAAGGGTAAGGAATGTCGTAAACACACCCAACACAAGGTTACCCAATATAAGGCTGGTAAGGCTTCCTTGTTTGCCCAAGGTAAGAGAAGATATGACCGTAAGCAATCAGGTTTCGGTGGTCAAACCAAGCCAGTTTTCCAAAAGAAGGCTAAGACTACCAAGAAGGTTGTCTTGAGATTGGAATGTGTTGTCTGCAAGACAAAGGCTCAATTGTCTTTGAAGAGATGTAAGCACTTCGAATTGGGTGGTGACAAGAAGCAAAAGGGTCAAGCTTTGCAATTCTAG	151		151	GGTGGTCAAACCAAG	VALID	CCA	Proline
yHMPu5000038319_teunomyces_panamensis_170912_g004729.m1	4236	ATGGTCCTTATTGAAAGAAGAAACGAACGTGTGAATAATATTCAAGGAAAGCTCGTGTTAATGAAAGAAGCGGAGCTTACTAACATTTTATCAGTTAACGTTCCAAAGACTAGAAAGACCTACTGCAAGGGTAAGGAATGTCGTAAACACACCCAACACAAGGTTACCCAATATAAGGCTGGTAAGGCTTCCTTGTTTGCTCAAGGTAAGAGAAGATATGACCGTAAGCAATCCGGTTTCGGTGGTCAAACCAAGCCAGTTTTCCAAAAGAAGGCCAAGACCACCAAGAAGGTTGTTTTGAGATTGGAATGTGTTGTTTGCAAGACCAAGGCTCAATTGTCCTTGAAGAGATGTAAGCACTTTGAATTGGGTGGTGACAAGAAGCAAAAGGGTCAAGCT…	ATGGTCCTTATTGAAAGAAGAAACGAACGTGTGAATAATATTCAAGGAAAGCTCGTGTTAATGAAAGAAGCGGAGCTTACTAACATTTTATCAGTTAACGTTCCAAAGACTAGAAAGACCTACTGCAAGGGTAAGGAATGTCGTAAACACACCCAACACAAGGTTACCCAATATAAGGCTGGTAAGGCTTCCTTGTTTGCTCAAGGTAAGAGAAGATATGACCGTAAGCAATCCGGTTTCGGTGGTCAAACCAAGCCAGTTTTCCAAAAGAAGGCCAAGACCACCAAGAAGGTTGTTTTGAGATTGGAATGTGTTGTTTGCAAGACCAAGGCTCAATTGTCCTTGAAGAGATGTAAGCACTTTGAATTGGGTGGTGACAAGAAGCAAAAGGGTCAAGCT…	241		241	GGTGGTCAAACCAAG	VALID	CCA	Proline
yHMPu5000037857_scheffersomyces_spartiniae_170210_g002431.m1	4236	ATGGATGTTAACGTTCCAAAGACTAGAAAGACCTACTGTAAGGGTAAGCAGTGCAGAAAGCACACCCAACACAAGGTTACCCAATATAAGGCTGGTAAGGCCTCCTTGTTTGCTCAAGGTAAGAGAAGATATGACCGTAAGCAAAGTGGTTTCGGTGGTCAAACCAAGCCTGTCTTCCACAAGAAGGCTAAGACTACCAAGAAGGTTGTCTTGAGATTGGAATGTGTTGTTTGCAAGACCAAGGCTCAATTGTCCTTGAAGAGATGTAAGCACTTCGAATTGGGTGGTGATAAGAAGCAAAAGGGTCAAGCCTTGCAATTCTAA	ATGGATGTTAACGTTCCAAAGACTAGAAAGACCTACTGTAAGGGTAAGCAGTGCAGAAAGCACACCCAACACAAGGTTACCCAATATAAGGCTGGTAAGGCCTCCTTGTTTGCTCAAGGTAAGAGAAGATATGACCGTAAGCAAAGTGGTTTCGGTGGTCAAACCAAGCCTGTCTTCCACAAGAAGGCTAAGACTACCAAGAAGGTTGTCTTGAGATTGGAATGTGTTGTTTGCAAGACCAAGGCTCAATTGTCCTTGAAGAGATGTAAGCACTTCGAATTGGGTGGTGATAAGAAGCAAAAGGGTCAAGCCTTGCAATTCTAA	154		154	GGTGGTCAAACCAAG	VALID	CCT	Proline
yHMPu5000035304_candida_santamariae_180604_g000075.m1	4236	ATGAAGCAAGCATCCGTATCACATATAACAGTGGTTATTCTCGGACAGATTTTAGTCATGATACCTTTGTCACATAGTGATGATGAGACTGCCAAAATTAACGTTCCAAAGACTAGAAAGACCTACTGTAAGGGTAAGCAATGTCGTAAGCACACTCAACACAAGGTTACTCAATACAAGGCTGGTAAGGCTTCCTTATTCGCTCAAGGTAAGAGAAGATATGACCGTAAGCAATCCGGTTTCGGTGGTCAAACCAAGCCAGTTTTCCACAAGAAGGCTAAGACCACCAAGAAGGTTGTCTTAAGATTAGAATGTGTTGTCTGTAAGACCAAGGCTCAATTATCATTAAAGAGATGTAAGCACTTCGAATTAGGTGGTGACAAGAAGCAAAAGGGTCAA…	ATGAAGCAAGCATCCGTATCACATATAACAGTGGTTATTCTCGGACAGATTTTAGTCATGATACCTTTGTCACATAGTGATGATGAGACTGCCAAAATTAACGTTCCAAAGACTAGAAAGACCTACTGTAAGGGTAAGCAATGTCGTAAGCACACTCAACACAAGGTTACTCAATACAAGGCTGGTAAGGCTTCCTTATTCGCTCAAGGTAAGAGAAGATATGACCGTAAGCAATCCGGTTTCGGTGGTCAAACCAAGCCAGTTTTCCACAAGAAGGCTAAGACCACCAAGAAGGTTGTCTTAAGATTAGAATGTGTTGTCTGTAAGACCAAGGCTCAATTATCATTAAAGAGATGTAAGCACTTCGAATTAGGTGGTGACAAGAAGCAAAAGGGTCAA…	244		244	GGTGGTCAAACCAAG	VALID	CCA	Proline
yHMPu5000035658_starmera_amethionina_160613.haplomerger2_g004402.m1	4236	ATGAACCCAAACCAACTTGATGCAAATCAAAAGTTGCAATTAAATCTTGAATTTAACGTTCCAAAAACTAGAAAAACCTACTGTAAAGGTAAAGAGTGTCGTAAACACACCCAACACAAAGTCACCCAATACAAAGCCGGTAAAGCTTCTTTGTTTGCTCAAGGTAAAAGACGTTATGACCGTAAACAAAGTGGTTACGGTGGTCAAACCAAACCAGTTTTCCATAAAAAAGCTAAAACTACCAAAAAAGTTGTTTTACGTTTAGAATGTGTTGTCTGTAAAACCAAAGCTCAATTATCCTTGAAACGTTGTAAACATTTTGAATTAGGTGGTGACAAAAAACAAAAAGGTCAAGCTTTACAATTTTAA	ATGAACCCAAACCAACTTGATGCAAATCAAAAGTTGCAATTAAATCTTGAATTTAACGTTCCAAAAACTAGAAAAACCTACTGTAAAGGTAAAGAGTGTCGTAAACACACCCAACACAAAGTCACCCAATACAAAGCCGGTAAAGCTTCTTTGTTTGCTCAAGGTAAAAGACGTTATGACCGTAAACAAAGTGGTTACGGTGGTCAAACCAAACCAGTTTTCCATAAAAAAGCTAAAACTACCAAAAAAGTTGTTTTACGTTTAGAATGTGTTGTCTGTAAAACCAAAGCTCAATTATCCTTGAAACGTTGTAAACATTTTGAATTAGGTGGTGACAAAAAACAAAAAGGTCAAGCTTTACAATTTTAA	199		199	GGTGGTCAAACCAAA	VALID	CCA	Proline
yHMPu5000034999_cephaloascus_fragrans_160519_g002065.m1	4236	ATGAAGGTGAACTCTGAACACTTGGGTAAATGGAAATTGGCGTTTTGCTTGACATTCGCAGAAGTGCTTTGTCTTACGAACATTTCTACGGATGAAAGAGCCACTGAAGCACCAAAATTCACTCCAGATGATTCGTTTAACGTTCCAAAAACAAGAAAGACCTATTGTAAAGGTAAAGAGTGTCGTAAACACACTCAACACAAGGTCACTCAATACAAGGCTGGTAAAGCTTCTTTATTCGCTCAAGGTAAAAGACGTTATGACCGTAAACAATCCGGTTACGGTGGTCAAACCAAACCAGTTTTCCATAAAAAAGCTAAGACTACCAAAAAAGTTGTTTTAAGATTAGAATGTGTTGTTTGTAAAACCAAGGCTCAATTATCATTAAAACGTTGTAAA…	ATGAAGGTGAACTCTGAACACTTGGGTAAATGGAAATTGGCGTTTTGCTTGACATTCGCAGAAGTGCTTTGTCTTACGAACATTTCTACGGATGAAAGAGCCACTGAAGCACCAAAATTCACTCCAGATGATTCGTTTAACGTTCCAAAAACAAGAAAGACCTATTGTAAAGGTAAAGAGTGTCGTAAACACACTCAACACAAGGTCACTCAATACAAGGCTGGTAAAGCTTCTTTATTCGCTCAAGGTAAAAGACGTTATGACCGTAAACAATCCGGTTACGGTGGTCAAACCAAACCAGTTTTCCATAAAAAAGCTAAGACTACCAAAAAAGTTGTTTTAAGATTAGAATGTGTTGTTTGTAAAACCAAGGCTCAATTATCATTAAAACGTTGTAAA…	283		283	GGTGGTCAAACCAAA	VALID	CCA	Proline
yHMPu5000037842_starmera_caribaea_210210_g006339.m1	4236	ATGACTCCAACCACCCACCAATCTCTTATTATGAAAACTGCGAAGTCATCGATGGCACCGTTAGATATCCAATTCTGGAAAGTCAGAATGGCCACTATAAAATTTATGGCACCAATTAGAGCAGAAGTGACTCTTATGAAGGGCACCAATGTTGATGAAAGCATTACCTATTTGGAAGATGACTTTCAGCAGCACCAACAACAAACACAGCAAAATGGAAAGAGAGAAGAAGAACCTGATATTAGACAGAAGAAGAGAACATCAATTAACGTTCCAAAAACTAGAAAAACCTACTGTAAAGGTAAAGAGTGTCGTAAACACACCCAACACAAAGTCACCCAATACAAAGCTGGTAAAGCTTCTTTGTTTGCCCAAGGTAAAAGACGTTATGACCGTAAA…	ATGACTCCAACCACCCACCAATCTCTTATTATGAAAACTGCGAAGTCATCGATGGCACCGTTAGATATCCAATTCTGGAAAGTCAGAATGGCCACTATAAAATTTATGGCACCAATTAGAGCAGAAGTGACTCTTATGAAGGGCACCAATGTTGATGAAAGCATTACCTATTTGGAAGATGACTTTCAGCAGCACCAACAACAAACACAGCAAAATGGAAAGAGAGAAGAAGAACCTGATATTAGACAGAAGAAGAGAACATCAATTAACGTTCCAAAAACTAGAAAAACCTACTGTAAAGGTAAAGAGTGTCGTAAACACACCCAACACAAAGTCACCCAATACAAAGCTGGTAAAGCTTCTTTGTTTGCCCAAGGTAAAAGACGTTATGACCGTAAA…	412		412	GGTGGTCAAACCAAA	VALID	CCA	Proline
yHMPu5000034756_hemisphaericaspora_nanyangensis_170713_g005548.m1	4236	ATGCCTCAACTACCTTTACCTATTTCATTGATGTTTACTGGCCCAATTTTTAGCAATATTAACGTCCCAAAAACTAGAAAGACCTACTGTAAGGGTAAGGAATGTCGTAAGCACACCCAACACAAAGTTACCCAATACAAGGCTGGTAAGGCTTCTTTATTCGCTCAAGGTAAGAGAAGATATGACCGTAAACAATCCGGTTTCGGTGGTCAAACCAAGCCAGTTTTCCACAAGAAAGCTAAGACTACCAAGAAGGTTGTTTTAAGATTAGAATGTGTTGTCTGTAAGACCAAGGCTCAATTATCCTTAAAGAGATGTAAGCACTTCGAATTAGGTGGTGACAAGAAACAAAAGGGTCAAGCTTTACAATTTTAA	ATGCCTCAACTACCTTTACCTATTTCATTGATGTTTACTGGCCCAATTTTTAGCAATATTAACGTCCCAAAAACTAGAAAGACCTACTGTAAGGGTAAGGAATGTCGTAAGCACACCCAACACAAAGTTACCCAATACAAGGCTGGTAAGGCTTCTTTATTCGCTCAAGGTAAGAGAAGATATGACCGTAAACAATCCGGTTTCGGTGGTCAAACCAAGCCAGTTTTCCACAAGAAAGCTAAGACTACCAAGAAGGTTGTTTTAAGATTAGAATGTGTTGTCTGTAAGACCAAGGCTCAATTATCCTTAAAGAGATGTAAGCACTTCGAATTAGGTGGTGACAAGAAACAAAAGGGTCAAGCTTTACAATTTTAA	205		205	GGTGGTCAAACCAAG	VALID	CCA	Proline
yHMPu5000035698_cyberlindnera_meyerae_160519.haplomerger2_g001997.m1	4236	ATGCTTCGTCTTCAGATTGTCTCTTCACTCATCATAAGTAATCAATCACTCGCAGATATACTAACACCACTCGCAGTTAACGTTCCAAAGACCAGAAAGACCTACTGTAAGGGTAAGGAGTGCCGTAAGCACACCCAGCACAAGGTCACCCAGTACAAGGCTGGTAAGGCTTCTCTTTTCGCCCAGGGTAAGCGTCGTTACGACCGTAAGCAGTCCGGTTACGGTGGTCAGACCAAGCCAGTCTTCCATAAGAAGGCTAAGACCACCAAGAAGGTCGTTTTGAGATTGGAGTGTGTCGTTTGCAAGACCAAGGCTCAGTTGGCTTTGAAGAGATGCAAGCACTTCGAGCTCGGTGGTGACAAGAAGCAGAAGGGTCAGGCTTTGCAGTTCTAA	ATGCTTCGTCTTCAGATTGTCTCTTCACTCATCATAAGTAATCAATCACTCGCAGATATACTAACACCACTCGCAGTTAACGTTCCAAAGACCAGAAAGACCTACTGTAAGGGTAAGGAGTGCCGTAAGCACACCCAGCACAAGGTCACCCAGTACAAGGCTGGTAAGGCTTCTCTTTTCGCCCAGGGTAAGCGTCGTTACGACCGTAAGCAGTCCGGTTACGGTGGTCAGACCAAGCCAGTCTTCCATAAGAAGGCTAAGACCACCAAGAAGGTCGTTTTGAGATTGGAGTGTGTCGTTTGCAAGACCAAGGCTCAGTTGGCTTTGAAGAGATGCAAGCACTTCGAGCTCGGTGGTGACAAGAAGCAGAAGGGTCAGGCTTTGCAGTTCTAA	#VALUE!	223	#VALUE!	#VALUE!	#VALUE!	#VALUE!	#VALUE!
yHMPu5000038081_candida_takata_180604_g003691.m1	4236	ATGGAGCTCTTGAAGTGTTGTACTATTGATCTTTTGAAACAATCAAATCGAGCTGTTGAGGCTATGGCCATGAAGTTGGGACTTGAAGCATCACATAACTGCGTTAACGTTCCAAAGACCAGAAGAACCTACTGTAAGGGTAAGGAGTGCAGAAAGCACACCCAGCACAAGGTCACCCAGTACAAGGCTGGTAAGGCTTCCCTTTTCGCTCAGGGTAAGCGTCGTTATGACCGTAAGCAATCCGGTTACGGTGGTCAGACCAAGCCAGTTTTCCATAAGAAGGCTAAGACTACCAAGAAGGTTGTCTTGCGTTTGGAGTGTGTTGTTTGCAAGACCAAGGCTCAGTTGGCCTTGAAGCGTTGTAAGCACTTTGAGTTGGGTGGTGACAAGAAGCAGAAG…	ATGGAGCTCTTGAAGTGTTGTACTATTGATCTTTTGAAACAATCAAATCGAGCTGTTGAGGCTATGGCCATGAAGTTGGGACTTGAAGCATCACATAACTGCGTTAACGTTCCAAAGACCAGAAGAACCTACTGTAAGGGTAAGGAGTGCAGAAAGCACACCCAGCACAAGGTCACCCAGTACAAGGCTGGTAAGGCTTCCCTTTTCGCTCAGGGTAAGCGTCGTTATGACCGTAAGCAATCCGGTTACGGTGGTCAGACCAAGCCAGTTTTCCATAAGAAGGCTAAGACTACCAAGAAGGTTGTCTTGCGTTTGGAGTGTGTTGTTTGCAAGACCAAGGCTCAGTTGGCCTTGAAGCGTTGTAAGCACTTTGAGTTGGGTGGTGACAAGAAGCAGAAG…	#VALUE!	250	#VALUE!	#VALUE!	#VALUE!	#VALUE!	#VALUE!
yHMPu5000034649_candida_plutei_180604_g003128.m1	4236	ATGGCAAACAAGCACATTCACATAACATGCGGTGTTAACGTTCCAAAAACTAGAAAGACCTACTGTAAGGGTAAGGAATGTCGTAAGCACACTCAACACAAGGTTACCCAATACAAGGCTGGTAAGGCTTCCTTATTCGCTCAAGGTAAGAGAAGATATGACAGAAAGCAATCCGGTTTCGGTGGTCAAACCAAGCCAGTTTTCCACAAGAAGGCTAAGACTACCAAGAAGGTTGTCTTGAGATTGGAATGTATCGTCTGCAAGACCAAGGCTCAATTGTCCTTGAAGAGATGTAAGCACTTCGAATTGGGTGGTGACAAGAAGCAAAAGGGTCAAGCTTTGCAATTTTAA	ATGGCAAACAAGCACATTCACATAACATGCGGTGTTAACGTTCCAAAAACTAGAAAGACCTACTGTAAGGGTAAGGAATGTCGTAAGCACACTCAACACAAGGTTACCCAATACAAGGCTGGTAAGGCTTCCTTATTCGCTCAAGGTAAGAGAAGATATGACAGAAAGCAATCCGGTTTCGGTGGTCAAACCAAGCCAGTTTTCCACAAGAAGGCTAAGACTACCAAGAAGGTTGTCTTGAGATTGGAATGTATCGTCTGCAAGACCAAGGCTCAATTGTCCTTGAAGAGATGTAAGCACTTCGAATTGGGTGGTGACAAGAAGCAAAAGGGTCAAGCTTTGCAATTTTAA	181		181	GGTGGTCAAACCAAG	VALID	CCA	Proline
yHMPu5000038320_teunomyces_funiuensis_170713_g000529.m1	4236	ATGCAATTCTCCAAATTAACCTTCTCTTTAGCCACCTTCTACTTGATTGCCAGCTCCTTGGCTGCTCCTGCCAACCTCAAGCGTGATGACTCGGACGATGATGCTCCTGTGATTGTTCGTGTGACCAAAACCGTCCAGAACGTCCAGACCAACGTCCACACCGTCCAGGCTCCTACCTCAACCACAACCAACGTCGTTGTCAACACCGAAACGGAAACCGTTACCAGATACACTGCCACTGTCACCTCCACTATCTTTGGGACTCCTCACACCTACACCACCGTTGCTACTACGCCGGTCCAGGCCAAGGATGTGATTCCTAACAGCCAGAACGAAGTCCAGCCATCAACGTCCGCTGCTGCTTCTTCATCTACTTCGATTGCTACTCCTGTCCAGATC…	ATGCAATTCTCCAAATTAACCTTCTCTTTAGCCACCTTCTACTTGATTGCCAGCTCCTTGGCTGCTCCTGCCAACCTCAAGCGTGATGACTCGGACGATGATGCTCCTGTGATTGTTCGTGTGACCAAAACCGTCCAGAACGTCCAGACCAACGTCCACACCGTCCAGGCTCCTACCTCAACCACAACCAACGTCGTTGTCAACACCGAAACGGAAACCGTTACCAGATACACTGCCACTGTCACCTCCACTATCTTTGGGACTCCTCACACCTACACCACCGTTGCTACTACGCCGGTCCAGGCCAAGGATGTGATTCCTAACAGCCAGAACGAAGTCCAGCCATCAACGTCCGCTGCTGCTTCTTCATCTACTTCGATTGCTACTCCTGTCCAGATC…	922		922	GGTGGTCAAACCAAG	VALID	CCA	Proline
yHMPu5000038323_scheffersomyces_lignicola_170713_g002052.m1	4236	ATGTCGAGTGAAGAGCCTCAAGCAAAGGTTATTGCCAAGTTTGACGGCATCGGTCTTAACGTTCCAAAAACTAGAAAGACCTACTGTAAGGGTAAGGAATGCAGAAAGCACACCCAACACAAAGTTACCCAATATAAGGCTGGTAAGGCTTCCTTATTCGCCCAAGGTAAGAGAAGATACGACCGTAAACAAAGAGGTTTCGGTGGTCAAACCAAGCCAGTTTTCCACAAGAAGGCCAAGACTACCAAGAAGGTTGTCTTGAGATTGGAATGTGTTGTCTGTAAGACCAAGGCTCAATTATCCTTGAAGAGATGTAAGCACTTCGAATTAGGTGGTGACAAGAAGCAAAAGGGTCAAGCTTTGCAATTTTAA	ATGTCGAGTGAAGAGCCTCAAGCAAAGGTTATTGCCAAGTTTGACGGCATCGGTCTTAACGTTCCAAAAACTAGAAAGACCTACTGTAAGGGTAAGGAATGCAGAAAGCACACCCAACACAAAGTTACCCAATATAAGGCTGGTAAGGCTTCCTTATTCGCCCAAGGTAAGAGAAGATACGACCGTAAACAAAGAGGTTTCGGTGGTCAAACCAAGCCAGTTTTCCACAAGAAGGCCAAGACTACCAAGAAGGTTGTCTTGAGATTGGAATGTGTTGTCTGTAAGACCAAGGCTCAATTATCCTTGAAGAGATGTAAGCACTTCGAATTAGGTGGTGACAAGAAGCAAAAGGGTCAAGCTTTGCAATTTTAA	202		202	GGTGGTCAAACCAAG	VALID	CCA	Proline
yHMPu5000038061_hyphopichia_pseudoburtonii_170912_g002183.m1	4236	ATGTCATTATTCGAGGGCTCAGTCATTATCTCGAATAATGCCGCTTCCAATCAAGAACAGAACTTAATTGATGTCACCCATCTAGGCAGTGACTACATTTTTTTCAAACTTAACGTTCCAAAGACTAGAAAGACCTACTGTAAGGGTAAGGAATGTCGTAAACACACCCAACACAAAGTTACCCAATACAAGGCTGGTAAAGCTTCTTTGTTCGCTCAAGGTAAGAGAAGATATGACCGTAAACAAAAGGGTTACGGTGGTCAAACCAAACCAGTTTTCCACAAGAAAGCTAAGACTACCAAGAAGGTTGTCTTGAGATTGGAATGTGTTGTTTGCAAAACCAAGGCTCAATTAAGTTTGAAGAGATGTAAGCACTTCGAATTGGGTGGTGACAAGAAA…	ATGTCATTATTCGAGGGCTCAGTCATTATCTCGAATAATGCCGCTTCCAATCAAGAACAGAACTTAATTGATGTCACCCATCTAGGCAGTGACTACATTTTTTTCAAACTTAACGTTCCAAAGACTAGAAAGACCTACTGTAAGGGTAAGGAATGTCGTAAACACACCCAACACAAAGTTACCCAATACAAGGCTGGTAAAGCTTCTTTGTTCGCTCAAGGTAAGAGAAGATATGACCGTAAACAAAAGGGTTACGGTGGTCAAACCAAACCAGTTTTCCACAAGAAAGCTAAGACTACCAAGAAGGTTGTCTTGAGATTGGAATGTGTTGTTTGCAAAACCAAGGCTCAATTAAGTTTGAAGAGATGTAAGCACTTCGAATTGGGTGGTGACAAGAAA…	256		256	GGTGGTCAAACCAAA	VALID	CCA	Proline
yHMPu5000035020_Candida_chickasaworum_SPADES_g002615.m1	4236	ATGACAGATGCCAACAAGAAACCAACATCAATGAATGTCCATCAAGAAACAATGTTTAACGTCCCAAAAACTAGAAAGACCTACTGTAAGGGTAAGGAGTGCCGTAAGCACACCCAACACAAAGTCACCCAATACAAGGCTGGTAAGGCTTCTTTGTTTGCTCAAGGTAAGAGAAGATATGACCGTAAGCAAAAGGGTTACGGTGGTCAAACTAAGCCAGTTTTCCACAAGAAAGCTAAGACTACCAAGAAGGTTGTCTTGAGATTGGAATGTGTTGTTTGCAAGACCAGAGCTCAACTTTCCTTGAAGAGATGTAAGCACTTCGAATTGGGTGGTGACAAGAAGCAAAAGGGTCAAGCCTTGCAATTCTAA	ATGACAGATGCCAACAAGAAACCAACATCAATGAATGTCCATCAAGAAACAATGTTTAACGTCCCAAAAACTAGAAAGACCTACTGTAAGGGTAAGGAGTGCCGTAAGCACACCCAACACAAAGTCACCCAATACAAGGCTGGTAAGGCTTCTTTGTTTGCTCAAGGTAAGAGAAGATATGACCGTAAGCAAAAGGGTTACGGTGGTCAAACTAAGCCAGTTTTCCACAAGAAAGCTAAGACTACCAAGAAGGTTGTCTTGAGATTGGAATGTGTTGTTTGCAAGACCAGAGCTCAACTTTCCTTGAAGAGATGTAAGCACTTCGAATTGGGTGGTGACAAGAAGCAAAAGGGTCAAGCCTTGCAATTCTAA	202		202	GGTGGTCAAACTAAG	VALID	CCA	Proline
yHKB357_New_Genus_SPADES_g004646.m1	4236	ATGGTTAACGTACCCAAGACGAGAAAGACGTACTGCAAAGGCAAGGAGTGCCGCAAGCACACGCAGCACAAGGTGACGCAGTACAAGGCCGGCAAGGCGTCGTTGTTTGCCCAGGGTAAGCGCAGATACGACCGTAAGCAGAAGGGTTACGGTGGTCAGACCAAGCCCGTTTTCCACAAGAAGGCCAAGACCACGAAGAAGGTTGTGTTGCGTTTGGAGTGCGTGGTATGCAAGACCCGCGCGCAATTGCTGTTGAAGAGATGCAAGCACTTTGAGTTGGGCGGTGACAAGAAACAGAAGGGCCAGGCCTTGCAGTTTTAA	ATGGTTAACGTACCCAAGACGAGAAAGACGTACTGCAAAGGCAAGGAGTGCCGCAAGCACACGCAGCACAAGGTGACGCAGTACAAGGCCGGCAAGGCGTCGTTGTTTGCCCAGGGTAAGCGCAGATACGACCGTAAGCAGAAGGGTTACGGTGGTCAGACCAAGCCCGTTTTCCACAAGAAGGCCAAGACCACGAAGAAGGTTGTGTTGCGTTTGGAGTGCGTGGTATGCAAGACCCGCGCGCAATTGCTGTTGAAGAGATGCAAGCACTTTGAGTTGGGCGGTGACAAGAAACAGAAGGGCCAGGCCTTGCAGTTTTAA	#VALUE!	151	#VALUE!	#VALUE!	#VALUE!	#VALUE!	#VALUE!
yHMPu5000034968_candida_maritima_160519_g003525.m1	4236	ATGTCCAAATTTAACGTCCCAAAGACCAGAAAGACTTATTGCAAGGGTAAGGAGTGCCGCAAGCACACCCAGCACAAGGTTACTCAGTACAAGGCTGGTAAGGCTTCCTTGTTTGCCCAGGGTAAGCGTCGTTACGACCGTAAGCAGTCCGGTTACGGTGGTCAGACCAAGCCAGTTTTCCACAAGAAGGCTAAGACTACCAAGAAGGTTGTCTTGAGATTGGAGTGTGTTGTTTGCAAGACCAAGGCTCAGCTTTCCTTGAAGAGATGTAAGCACTTCGAGCTTGGTGGTGACAAGAAGCAGAAGGGTCAGGCTTTGCAGTTCTAA	ATGTCCAAATTTAACGTCCCAAAGACCAGAAAGACTTATTGCAAGGGTAAGGAGTGCCGCAAGCACACCCAGCACAAGGTTACTCAGTACAAGGCTGGTAAGGCTTCCTTGTTTGCCCAGGGTAAGCGTCGTTACGACCGTAAGCAGTCCGGTTACGGTGGTCAGACCAAGCCAGTTTTCCACAAGAAGGCTAAGACTACCAAGAAGGTTGTCTTGAGATTGGAGTGTGTTGTTTGCAAGACCAAGGCTCAGCTTTCCTTGAAGAGATGTAAGCACTTCGAGCTTGGTGGTGACAAGAAGCAGAAGGGTCAGGCTTTGCAGTTCTAA	#VALUE!	157	#VALUE!	#VALUE!	#VALUE!	#VALUE!	#VALUE!
yHMPu5000026273_kodamaea_nitidulidarum_170307_g000641.m1	4236	AACGTCCCAAAAACTAGAAAGACCTACTGTAAGGGTAAGGAGTGCCGCAAGCACACCCAGCACAAGGTGACCCAATACAAGGCTGGTAAGGCTTCTTTGTTTGCCCAGGGTAAGAGAAGATATGACAGAAAGCAGTCCGGTTTCGGTGGTCAGACCAAGCCAGTTTTCCACAAGAAGGCCAAGACCACCAAGAAGGTTGTCTTGAGATTGGAGTGTGTTGTTTGCAAGACCAAGGCTCAGCTCTCTTTGAAGAGATGTAAGCACTTCGAGTTGGGTGGTGACAAGAAGCAAAAGGGTCAAGCTTTGCAGTTCTAA	AACGTCCCAAAAACTAGAAAGACCTACTGTAAGGGTAAGGAGTGCCGCAAGCACACCCAGCACAAGGTGACCCAATACAAGGCTGGTAAGGCTTCTTTGTTTGCCCAGGGTAAGAGAAGATATGACAGAAAGCAGTCCGGTTTCGGTGGTCAGACCAAGCCAGTTTTCCACAAGAAGGCCAAGACCACCAAGAAGGTTGTCTTGAGATTGGAGTGTGTTGTTTGCAAGACCAAGGCTCAGCTCTCTTTGAAGAGATGTAAGCACTTCGAGTTGGGTGGTGACAAGAAGCAAAAGGGTCAAGCTTTGCAGTTCTAA	#VALUE!	145	#VALUE!	#VALUE!	#VALUE!	#VALUE!	#VALUE!
yHMPu5000041793_schwanniomyces_etchellsii_180604_g005431.m1	4236	ATGTCCTCCGTTAACGTTCCAAAGACTAGAAAGACCTACTGTAAGGGTAAAGAATGCCGTAAGCACACTCAACACAAGGTTACCCAATACAAGGCTGGTAAGGCTTCCTTGTTCGCTCAAGGTAAGAGAAGATATGACCGTAAGCAAAGAGGTTTCGGTGGTCAAACAAAGCCAATTTTCCACAAGAAAGCTAAGACCACCAAGAAGGTTGTCTTGAGATTGGAGTGTGTCGTCTGTAAGACCAAAGCTCAATTATGTTTGAAGAGATGTAAGCATTTCGAATTGGGTGGTGACAAGAAACAAAAGGGTCAAGCTTTGCAATTCTAA	ATGTCCTCCGTTAACGTTCCAAAGACTAGAAAGACCTACTGTAAGGGTAAAGAATGCCGTAAGCACACTCAACACAAGGTTACCCAATACAAGGCTGGTAAGGCTTCCTTGTTCGCTCAAGGTAAGAGAAGATATGACCGTAAGCAAAGAGGTTTCGGTGGTCAAACAAAGCCAATTTTCCACAAGAAAGCTAAGACCACCAAGAAGGTTGTCTTGAGATTGGAGTGTGTCGTCTGTAAGACCAAAGCTCAATTATGTTTGAAGAGATGTAAGCATTTCGAATTGGGTGGTGACAAGAAACAAAAGGGTCAAGCTTTGCAATTCTAA	157		157	GGTGGTCAAACAAAG	VALID	CCA	Proline
yHMPu5000038114_candida_anutae_170912_g001643.m1	4236	ATGAAGCAATCTCCAAGTTCTATACTAACCTCAATAGTTAACGTTCCTAAGACCAGAAAGACCTACTGCAAGGGTAAGGAGTGCCGCAAGCACACCCAACACAAGGTGACCCAGTACAAGGCCGGTAAGGCTTCGCTTTTCGCCCAGGGTAAGAGAAGATACGACCGTAAGCAAAAGGGTTTCGGAGGTCAGACCAAGCCCGTTTTCCACAAGAAGGCCAAGACCACCAAGAAGGTTGTCTTGAGATTGGAGTGTGTTGTTTGCAAGACCAAGGCTCAGCTCTCCTTGAAGAGATGTAAGCACTTTGAGTTGGGTGGTGACAAGAAGCAGAAGGGCCAGGCCTTGCAGTTCTAA	ATGAAGCAATCTCCAAGTTCTATACTAACCTCAATAGTTAACGTTCCTAAGACCAGAAAGACCTACTGCAAGGGTAAGGAGTGCCGCAAGCACACCCAACACAAGGTGACCCAGTACAAGGCCGGTAAGGCTTCGCTTTTCGCCCAGGGTAAGAGAAGATACGACCGTAAGCAAAAGGGTTTCGGAGGTCAGACCAAGCCCGTTTTCCACAAGAAGGCCAAGACCACCAAGAAGGTTGTCTTGAGATTGGAGTGTGTTGTTTGCAAGACCAAGGCTCAGCTCTCCTTGAAGAGATGTAAGCACTTTGAGTTGGGTGGTGACAAGAAGCAGAAGGGCCAGGCCTTGCAGTTCTAA	#VALUE!	184	#VALUE!	#VALUE!	#VALUE!	#VALUE!	#VALUE!
candida_orthopsilosis_g000647.m1	4236	ATGGACGCATCAGGGAAAACATGTATGAACGTTCCAAAAACCAGAAGAACCTACTGTAAAGGTAAAGAATGTCGTAAACACACCCAACACAAGGTCACTCAATACAAAGCTGGTAAAGCTTCATTGTTTGCCCAAGGTAAGAGAAGATATGACAGAAAACAAAAGGGTTATGGTGGTCAAACCAAGCCAGTTTTCCACAAAAAGGCAAAGACTACCAAGAAAGTTGTTTTGAGATTGGAATGTGTTGTCTGTAAGACCAAGGCTCAATTGGCTTTGAAGAGATGTAAACATTTCGAATTGGGTGGTGACAAGAAACAAAAGGGTCAAGCTTTACAATTCTAA	ATGGACGCATCAGGGAAAACATGTATGAACGTTCCAAAAACCAGAAGAACCTACTGTAAAGGTAAAGAATGTCGTAAACACACCCAACACAAGGTCACTCAATACAAAGCTGGTAAAGCTTCATTGTTTGCCCAAGGTAAGAGAAGATATGACAGAAAACAAAAGGGTTATGGTGGTCAAACCAAGCCAGTTTTCCACAAAAAGGCAAAGACTACCAAGAAAGTTGTTTTGAGATTGGAATGTGTTGTCTGTAAGACCAAGGCTCAATTGGCTTTGAAGAGATGTAAACATTTCGAATTGGGTGGTGACAAGAAACAAAAGGGTCAAGCTTTACAATTCTAA	172		172	GGTGGTCAAACCAAG	VALID	CCA	Proline
yHMPu5000035700_cyberlindnera_japonica_160519_g004802.m1	4236	ATGGAGGAGACAGGTGTACCAATTAACGTTCCAAAGACCAGAAGAACTTACTGCAAGGGTAAGGAGTGCCGTAAGCACACCCAGCACAAGGTCACTCAGTACAAGGCTGGTAAGGCTTCCCTTTTCGCTCAAGGTAAGCGTCGTTACGACCGTAAGCAGTCTGGTTACGGTGGTCAGACCAAGCCAGTCTTCCATAAGAAGGCTAAGACCACCAAGAAGGTTGTTTTGAGATTGGAGTGTGTTGTTTGCAAGACCAAGGCCCAGTTGGCTTTGAAGAGATGTAAGCACTTCGAGCTCGGTGGTGACAAGAAGCAGAAGGGTCAGGCTTTGCAGTTCTAA	ATGGAGGAGACAGGTGTACCAATTAACGTTCCAAAGACCAGAAGAACTTACTGCAAGGGTAAGGAGTGCCGTAAGCACACCCAGCACAAGGTCACTCAGTACAAGGCTGGTAAGGCTTCCCTTTTCGCTCAAGGTAAGCGTCGTTACGACCGTAAGCAGTCTGGTTACGGTGGTCAGACCAAGCCAGTCTTCCATAAGAAGGCTAAGACCACCAAGAAGGTTGTTTTGAGATTGGAGTGTGTTGTTTGCAAGACCAAGGCCCAGTTGGCTTTGAAGAGATGTAAGCACTTCGAGCTCGGTGGTGACAAGAAGCAGAAGGGTCAGGCTTTGCAGTTCTAA	#VALUE!	169	#VALUE!	#VALUE!	#VALUE!	#VALUE!	#VALUE!
yHMPu5000034981_cyberlindnera_euphorbiae_160519.haplomerger2_g005542.m1	4236	ATGGACAGATTCAAGACACACCAAGGGCCCATTAACGTTCCAAAGACCAGAAAGACCTACTGTAAGGGTAAGGAGTGCCGTAAGCACACCCAGCACAAGGTCACCCAGTACAAGGCTGGTAAGGCTTCTCTTTTCGCCCAGGGTAAGCGTCGTTACGACCGTAAGCAGGCCGGTTACGGTGGTCAGACCAAGCCAGTCTTCCACAAGAAGGCTAAGACTACCAAGAAGGTTGTTTTGAGATTGGAGTGTGTCGTTTGCAAGACCAAGGCTCAGTTGGCTTTGAAGAGATGTAAGCACTTCGAGCTCGGTGGTGACAAGAAGCAGAAGGGTCAGGCTTTGCAGTTCTAA	ATGGACAGATTCAAGACACACCAAGGGCCCATTAACGTTCCAAAGACCAGAAAGACCTACTGTAAGGGTAAGGAGTGCCGTAAGCACACCCAGCACAAGGTCACCCAGTACAAGGCTGGTAAGGCTTCTCTTTTCGCCCAGGGTAAGCGTCGTTACGACCGTAAGCAGGCCGGTTACGGTGGTCAGACCAAGCCAGTCTTCCACAAGAAGGCTAAGACTACCAAGAAGGTTGTTTTGAGATTGGAGTGTGTCGTTTGCAAGACCAAGGCTCAGTTGGCTTTGAAGAGATGTAAGCACTTCGAGCTCGGTGGTGACAAGAAGCAGAAGGGTCAGGCTTTGCAGTTCTAA	#VALUE!	178	#VALUE!	#VALUE!	#VALUE!	#VALUE!	#VALUE!
yHMPu5000038078_candida_taoyuanica_170912_g003224.m1	4236	ATGTTCTCATACTCTATAGCATATTTCAGCTACCTCAACGTTCCAAAGACCAGAAGAACTTACTGTAAGGGTAAGGAGTGCCGTAAGCACACCCAGCACAAGGTTACTCAGTACAAGGCTGGTAAGGCTTCCCTTTTCGCCCAGGGTAAGCGTCGTTATGACCGTAAACAGTCCGGTTACGGTGGTCAGACCAAGCCAGTCTTCCACAAGAAGGCTAAGACTACCAAGAAGGTTGTTTTGAGATTGGAGTGTGTTGTCTGCAAGACCAAGGCTCAGCTCGCTTTGAAGAGATGTAAGCACTTCGAGCTTGGTGGTGACAAGAAGCAGAAGGGTCAGGCTTTGCAGTTCTAA	ATGTTCTCATACTCTATAGCATATTTCAGCTACCTCAACGTTCCAAAGACCAGAAGAACTTACTGTAAGGGTAAGGAGTGCCGTAAGCACACCCAGCACAAGGTTACTCAGTACAAGGCTGGTAAGGCTTCCCTTTTCGCCCAGGGTAAGCGTCGTTATGACCGTAAACAGTCCGGTTACGGTGGTCAGACCAAGCCAGTCTTCCACAAGAAGGCTAAGACTACCAAGAAGGTTGTTTTGAGATTGGAGTGTGTTGTCTGCAAGACCAAGGCTCAGCTCGCTTTGAAGAGATGTAAGCACTTCGAGCTTGGTGGTGACAAGAAGCAGAAGGGTCAGGCTTTGCAGTTCTAA	#VALUE!	181	#VALUE!	#VALUE!	#VALUE!	#VALUE!	#VALUE!
yHMPu5000038121_candida_hungchunana_170912_g003746.m1	4236	ATGGGTACTACGGAGGTGAGGGCACAAGCACAGAGTTTCTTCGAGCCAAAGAGTAACTTGTTTTATGAGGAAGGCCCATCAAGAAGGGCTAGACAAATACCGTTTGAGCACCACTTTCTTTCACTTCCACAGTTACCAGAAGACCGCAAAGCCAAGTTGTATGTTAACGTTCCAAAGACCAGAAGAACTTACTGTAAGGGTAAGGAGTGCAGAAAGCACACCCAGCACAAGGTCACTCAGTACAAGGCTGGTAAGGCTTCCCTCTTCGCTCAGGGTAAGCGTCGTTATGACCGTAAGCAGTCCGGTTACGGTGGTCAGACCAAGCCAGTCTTCCATAAGAAGGCTAAGACCACCAAGAAGGTCGTTTTGAGATTGGAGTGTGTTGTCTGCAAGACCAAG…	ATGGGTACTACGGAGGTGAGGGCACAAGCACAGAGTTTCTTCGAGCCAAAGAGTAACTTGTTTTATGAGGAAGGCCCATCAAGAAGGGCTAGACAAATACCGTTTGAGCACCACTTTCTTTCACTTCCACAGTTACCAGAAGACCGCAAAGCCAAGTTGTATGTTAACGTTCCAAAGACCAGAAGAACTTACTGTAAGGGTAAGGAGTGCAGAAAGCACACCCAGCACAAGGTCACTCAGTACAAGGCTGGTAAGGCTTCCCTCTTCGCTCAGGGTAAGCGTCGTTATGACCGTAAGCAGTCCGGTTACGGTGGTCAGACCAAGCCAGTCTTCCATAAGAAGGCTAAGACCACCAAGAAGGTCGTTTTGAGATTGGAGTGTGTTGTCTGCAAGACCAAG…	#VALUE!	310	#VALUE!	#VALUE!	#VALUE!	#VALUE!	#VALUE!
yHMPu5000035044_barnettozyma_californica_160519_g002606.m1	4236	ATGAAGAACTCCACTCTCCACCTTTCTATCTTTGTAACCATCAATAACCAACAACCAGGTACTAACATTACAACAGTTAACGTTCCAAAGACCAGAAAGACCTACTGCAAGGGTAAGGAGTGCCGTAAGCACACCCAACACAAGGTTACCCAATACAAGGCTGGTAAGGCCTCCTTGTTCGCCCAAGGTAAGAGACGTTATGACCGTAAGCAATCCGGTTACGGTGGTCAAACCAAGCCAGTCTTCCACAAGAAAGCTAAGACTACCAAGAAGGTTGTTTTGCGTTTGGAGTGTGTTGTCTGCAAGACCAGAGCTCAATTGTCCTTGAAGCGTTGTAAGCACTTTGAATTGGGTGGTGACAGAAAGCAAAAGGGTCAAGCTTTGCAATTCTAA	ATGAAGAACTCCACTCTCCACCTTTCTATCTTTGTAACCATCAATAACCAACAACCAGGTACTAACATTACAACAGTTAACGTTCCAAAGACCAGAAAGACCTACTGCAAGGGTAAGGAGTGCCGTAAGCACACCCAACACAAGGTTACCCAATACAAGGCTGGTAAGGCCTCCTTGTTCGCCCAAGGTAAGAGACGTTATGACCGTAAGCAATCCGGTTACGGTGGTCAAACCAAGCCAGTCTTCCACAAGAAAGCTAAGACTACCAAGAAGGTTGTTTTGCGTTTGGAGTGTGTTGTCTGCAAGACCAGAGCTCAATTGTCCTTGAAGCGTTGTAAGCACTTTGAATTGGGTGGTGACAGAAAGCAAAAGGGTCAAGCTTTGCAATTCTAA	223		223	GGTGGTCAAACCAAG	VALID	CCA	Proline
yHMPu5000034933_kuraishia_molischiana_160519_g001720.m1	4236	ATGGTTAACGTTCCAAAGACCAGAAAGACATACTGCAAGGGTAAGACCTGCCGCAAGCACACCCAGCACAAGGTTACCCAGTACAAGGCTGGTAAGGCCTCTCTGTACGCCCAGGGTAAGCGTCGTTACGACCGTAAGCAGTCCGGTTACGGTGGTCAGACCAAGCCTGTCTTCCACAAGAAGGCTAAGACCACCAAGAAGGTTGTCCTGAGATTGGAGTGTGTTGCCTGCAAGACCAAGGCTCAGTTGACCTTGAAGCGTTGCAAGCACTTCGAGCTCGGTGGTGACAAGAAGCAGAAGGGTCAGGCCCTGCAGTTCTAA	ATGGTTAACGTTCCAAAGACCAGAAAGACATACTGCAAGGGTAAGACCTGCCGCAAGCACACCCAGCACAAGGTTACCCAGTACAAGGCTGGTAAGGCCTCTCTGTACGCCCAGGGTAAGCGTCGTTACGACCGTAAGCAGTCCGGTTACGGTGGTCAGACCAAGCCTGTCTTCCACAAGAAGGCTAAGACCACCAAGAAGGTTGTCCTGAGATTGGAGTGTGTTGCCTGCAAGACCAAGGCTCAGTTGACCTTGAAGCGTTGCAAGCACTTCGAGCTCGGTGGTGACAAGAAGCAGAAGGGTCAGGCCCTGCAGTTCTAA	#VALUE!	151	#VALUE!	#VALUE!	#VALUE!	#VALUE!	#VALUE!
yHMPu5000034937_kuraishia_capsulata_160519_g003718.m1	4236	ATGGTTAACGTTCCAAAGACCAGAAAGACCTACTGCAAAGGTAAGACTTGCCGCAAGCACACCCAACACAAGGTGACCCAATACAAGGCTGGTAAGGCTTCCCTGTACGCCCAAGGTAAGCGTCGTTACGACCGTAAGCAATCCGGTTACGGTGGTCAGACCAAGCCAGTTTTCCACAAGAAAGCCAAGACTACCAAGAAGGTTGTGTTGAGATTGGAATGTGTTGCTTGTAAGACCAAGGCCCAATTGACTTTGAAGCGTTGTAAGCACTTCGAGTTGGGTGGTGACAAGAAGCAAAAGGGTCAAGCTTTGCAGTTCTAA	ATGGTTAACGTTCCAAAGACCAGAAAGACCTACTGCAAAGGTAAGACTTGCCGCAAGCACACCCAACACAAGGTGACCCAATACAAGGCTGGTAAGGCTTCCCTGTACGCCCAAGGTAAGCGTCGTTACGACCGTAAGCAATCCGGTTACGGTGGTCAGACCAAGCCAGTTTTCCACAAGAAAGCCAAGACTACCAAGAAGGTTGTGTTGAGATTGGAATGTGTTGCTTGTAAGACCAAGGCCCAATTGACTTTGAAGCGTTGTAAGCACTTCGAGTTGGGTGGTGACAAGAAGCAAAAGGGTCAAGCTTTGCAGTTCTAA	#VALUE!	151	#VALUE!	#VALUE!	#VALUE!	#VALUE!	#VALUE!
yHMPu5000038408_candida_borneonana_170713_g004915.m1	4236	ATGGTTAACGTTCCAAAGACCAGAAAGACTTACTGCAAGGGTAAGACTTGCCGCAAGCACACCCAACACAAGGTTACCCAATACAAGGCCGGTAAGGCTTCTTTGTACGCTCAAGGTAAGCGTCGTTACGACCGTAAGCAATCCGGTTTCGGTGGTCAAACCAAGCCAGTTTTCCACAAGAAGGCTAAGACTACCAAGAAGGTTGTCTTGAGATTGGAGTGTGTTGCCTGCAAGACCAAGGCTCAACTCACTTTGAAGCGTTGCAAGCACTTCGAGCTTGGTGGTGACAAGAAGCAAAAGGGACAAGCTTTGCAATTCTAA	ATGGTTAACGTTCCAAAGACCAGAAAGACTTACTGCAAGGGTAAGACTTGCCGCAAGCACACCCAACACAAGGTTACCCAATACAAGGCCGGTAAGGCTTCTTTGTACGCTCAAGGTAAGCGTCGTTACGACCGTAAGCAATCCGGTTTCGGTGGTCAAACCAAGCCAGTTTTCCACAAGAAGGCTAAGACTACCAAGAAGGTTGTCTTGAGATTGGAGTGTGTTGCCTGCAAGACCAAGGCTCAACTCACTTTGAAGCGTTGCAAGCACTTCGAGCTTGGTGGTGACAAGAAGCAAAAGGGACAAGCTTTGCAATTCTAA	151		151	GGTGGTCAAACCAAG	VALID	CCA	Proline
yHDO587_citeromyces_nyonsensis_180604.haplomerger2_g002449.m1	4236	ATGGTGAACGTTCCAAAAACCAGAAAGACTTATTGCAAGGGTAAGACCTGCAGAAAGCACACTCAACACAAGGTTACCCAATATAAGGCTGGTAAGGCTTCCCTTTTCGCTCAGGGTAAGAGAAGATACGACCGTAAACAAAGAGGTTACGGTGGTCAAACTAAGCCAGTTTTCCATAAAAAGGCCAAGACTACCAAAAAGGTTGTTTTGCGTTTGGAATGTGTTGCTTGCAAGACCAGAGCTCAACTTTGTCTGAAGAGATGCAAGCACTTTGAGCTTGGTGGTGACAAGAAGCAAAAGGGACAAGCTCTGCAATTCTAA	ATGGTGAACGTTCCAAAAACCAGAAAGACTTATTGCAAGGGTAAGACCTGCAGAAAGCACACTCAACACAAGGTTACCCAATATAAGGCTGGTAAGGCTTCCCTTTTCGCTCAGGGTAAGAGAAGATACGACCGTAAACAAAGAGGTTACGGTGGTCAAACTAAGCCAGTTTTCCATAAAAAGGCCAAGACTACCAAAAAGGTTGTTTTGCGTTTGGAATGTGTTGCTTGCAAGACCAGAGCTCAACTTTGTCTGAAGAGATGCAAGCACTTTGAGCTTGGTGGTGACAAGAAGCAAAAGGGACAAGCTCTGCAATTCTAA	151		151	GGTGGTCAAACTAAG	VALID	CCA	Proline
yHMPu5000026142_citeromyces_matritensis_160519.haplomerger2_g006211.m1	4236	ATGGTGAACGTTCCAAAGACCAGAAAGACTTACTGCAAGGGAAAGACCTGCAGAAAGCACACCCAACACAAAGTTACCCAATATAAGGCTGGTAAGGCTTCCCTTTTCGCCCAGGGTAAGAGAAGATACGACCGTAAACAAAGAGGTTACGGTGGTCAAACCAAGCCAGTTTTCCACAAGAAAGCCAAGACTACCAAGAAGGTTGTTTTGCGTTTGGAATGTGTAGCTTGCAAGACCAGAGCTCAGCTTTGTCTCAAGAGATGCAAGCACTTTGAACTTGGTGGTGACAAGAAGCAAAAGGGACAAGCTCTGCAATTCTAA	ATGGTGAACGTTCCAAAGACCAGAAAGACTTACTGCAAGGGAAAGACCTGCAGAAAGCACACCCAACACAAAGTTACCCAATATAAGGCTGGTAAGGCTTCCCTTTTCGCCCAGGGTAAGAGAAGATACGACCGTAAACAAAGAGGTTACGGTGGTCAAACCAAGCCAGTTTTCCACAAGAAAGCCAAGACTACCAAGAAGGTTGTTTTGCGTTTGGAATGTGTAGCTTGCAAGACCAGAGCTCAGCTTTGTCTCAAGAGATGCAAGCACTTTGAACTTGGTGGTGACAAGAAGCAAAAGGGACAAGCTCTGCAATTCTAA	151		151	GGTGGTCAAACCAAG	VALID	CCA	Proline
yHMPu5000034950_citeromyces_hawaiiensis_170307.haplomerger2_g003220.m1	4236	ATGGTGAACGTTCCAAAAACCAGAAAGACTTATTGCAAGGGTAAGACCTGCAGAAAGCACACCCAACACAAGGTTACCCAATATAAGGCTGGTAAGGCTTCCCTTTTCGCCCAGGGTAAGAGAAGATATGACCGTAAACAAAGAGGTTACGGTGGTCAAACTAAGCCAGTTTTCCACAAAAAGGCCAAGACTACCAAGAAGGTTGTTTTGCGTTTGGAATGTGTTGCTTGCAAGACCAGAGCTCAACTCTGTCTGAAGAGATGCAAGCACTTTGAACTTGGTGGTGACAAGAAGCAAAAGGGACAAGCTCTGCAATTCTAA	ATGGTGAACGTTCCAAAAACCAGAAAGACTTATTGCAAGGGTAAGACCTGCAGAAAGCACACCCAACACAAGGTTACCCAATATAAGGCTGGTAAGGCTTCCCTTTTCGCCCAGGGTAAGAGAAGATATGACCGTAAACAAAGAGGTTACGGTGGTCAAACTAAGCCAGTTTTCCACAAAAAGGCCAAGACTACCAAGAAGGTTGTTTTGCGTTTGGAATGTGTTGCTTGCAAGACCAGAGCTCAACTCTGTCTGAAGAGATGCAAGCACTTTGAACTTGGTGGTGACAAGAAGCAAAAGGGACAAGCTCTGCAATTCTAA	151		151	GGTGGTCAAACTAAG	VALID	CCA	Proline
yHMPu5000035277_candida_pararugosa_201018_g004985.m1	4236	ATGGTTAACATTCCCAAGACCCGTAAGACCTACTGCAAGGGCAAGAATTGCCGCAAGCATACTCAGCACAAAGTCACCCAGTACAAGGCCGGCAAGGCTTCCCTTTTCGCTCAGGGTAAGCGTCGTTATGACCGCAAACAGCGTGGTTACGGTGGTCAGACCAAGCCCGTTTTCCACAAGAAAGCCAAGACTACCAAGAAGGTTGTTCTCCGTCTTGAGTGCGTCTCTTGCAAGACCAAGGCCCAGCTCTCTCTTAAGCGCTGCAAGCACTTCGAGCTCGGTGGTGACAAGAAACAAAAGGGCCAGGCCCTCCAATTCTAA	ATGGTTAACATTCCCAAGACCCGTAAGACCTACTGCAAGGGCAAGAATTGCCGCAAGCATACTCAGCACAAAGTCACCCAGTACAAGGCCGGCAAGGCTTCCCTTTTCGCTCAGGGTAAGCGTCGTTATGACCGCAAACAGCGTGGTTACGGTGGTCAGACCAAGCCCGTTTTCCACAAGAAAGCCAAGACTACCAAGAAGGTTGTTCTCCGTCTTGAGTGCGTCTCTTGCAAGACCAAGGCCCAGCTCTCTCTTAAGCGCTGCAAGCACTTCGAGCTCGGTGGTGACAAGAAACAAAAGGGCCAGGCCCTCCAATTCTAA	#VALUE!	151	#VALUE!	#VALUE!	#VALUE!	#VALUE!	#VALUE!
yHMPu5000037209_wickerhamiella_shivajii_210210_g003476.m1	4236	ATGGTTAACATTCCCAAGACCCGTAAGACCTACTGCAAGGGCAAGAATTGCCGCAAGCATACTCAGCACAAAGTCACCCAGTACAAGGCCGGCAAGGCTTCCCTTTTCGCTCAGGGTAAGCGTCGTTACGACCGCAAACAGCGTGGTTACGGTGGTCAGACCAAGCCCGTTTTCCACAAGAAAGCCAAGACCACCAAGAAGGTCGTTCTTCGTCTTGAGTGCGTCGCTTGCAAGACCAAGGCCCAGCTCTCTCTTAAGCGCTGCAAGCACTTCGAGCTCGGTGGTGACAAGAAACAAAAGGGCCAGGCCCTCCAATTCTAA	ATGGTTAACATTCCCAAGACCCGTAAGACCTACTGCAAGGGCAAGAATTGCCGCAAGCATACTCAGCACAAAGTCACCCAGTACAAGGCCGGCAAGGCTTCCCTTTTCGCTCAGGGTAAGCGTCGTTACGACCGCAAACAGCGTGGTTACGGTGGTCAGACCAAGCCCGTTTTCCACAAGAAAGCCAAGACCACCAAGAAGGTCGTTCTTCGTCTTGAGTGCGTCGCTTGCAAGACCAAGGCCCAGCTCTCTCTTAAGCGCTGCAAGCACTTCGAGCTCGGTGGTGACAAGAAACAAAAGGGCCAGGCCCTCCAATTCTAA	#VALUE!	151	#VALUE!	#VALUE!	#VALUE!	#VALUE!	#VALUE!
yHMPu5000035317_candida_fennica_180604_g002527.m1	4236	ATGGTTAACGTTCCAAAGACTAGAAAGACTTACTGTAAAGGTAAGACCTGTCGTAAGCACACTCAACACAAAGTTACCCAATATAAAGCTGGTAAAGCTTCTTTATTCGCTCAAGGTAAAAGAAGATATGACCGTAAACAAAAAGGTTACGGTGGTCAAACCAAACCAGTTTTCCACAAGAAAGCTAAAACTACCAAAAAAGTTGTTTTAAGATTAGAATGTGTTGCTTGTAAAACTAAAGCTCAATTAAGTTTAAAGAGATGTAAACATTTCGAATTGGGTGGTGATAAAAAACAAAAAGGTCAAGCCTTACAATTTTAA	ATGGTTAACGTTCCAAAGACTAGAAAGACTTACTGTAAAGGTAAGACCTGTCGTAAGCACACTCAACACAAAGTTACCCAATATAAAGCTGGTAAAGCTTCTTTATTCGCTCAAGGTAAAAGAAGATATGACCGTAAACAAAAAGGTTACGGTGGTCAAACCAAACCAGTTTTCCACAAGAAAGCTAAAACTACCAAAAAAGTTGTTTTAAGATTAGAATGTGTTGCTTGTAAAACTAAAGCTCAATTAAGTTTAAAGAGATGTAAACATTTCGAATTGGGTGGTGATAAAAAACAAAAAGGTCAAGCCTTACAATTTTAA	151		151	GGTGGTCAAACCAAA	VALID	CCA	Proline
yHMPu5000035682_hyphopichia_burtonii_160613_g005277.m1	4236	ATGGTTAACGTTCCAAAGACTAGAAAGACTTACTGTAAAGGTAAGACCTGTCGTAAACACACCCAACACAAAGTTACCCAATATAAAGCTGGTAAAGCTTCTTTATTCGCTCAAGGTAAAAGAAGATATGACCGTAAACAAAAAGGTTATGGTGGTCAAACCAAACCAGTTTTCCACAAGAAAGCTAAGACTACCAAAAAGGTTGTTTTAAGATTAGAATGTGTTGCTTGTAAAACTAAAGCTCAATTAAGTTTGAAAAGATGTAAACACTTCGAATTGGGTGGTGATAAAAAACAAAAAGGTCAAGCCTTACAATTTTAA	ATGGTTAACGTTCCAAAGACTAGAAAGACTTACTGTAAAGGTAAGACCTGTCGTAAACACACCCAACACAAAGTTACCCAATATAAAGCTGGTAAAGCTTCTTTATTCGCTCAAGGTAAAAGAAGATATGACCGTAAACAAAAAGGTTATGGTGGTCAAACCAAACCAGTTTTCCACAAGAAAGCTAAGACTACCAAAAAGGTTGTTTTAAGATTAGAATGTGTTGCTTGTAAAACTAAAGCTCAATTAAGTTTGAAAAGATGTAAACACTTCGAATTGGGTGGTGATAAAAAACAAAAAGGTCAAGCCTTACAATTTTAA	151		151	GGTGGTCAAACCAAA	VALID	CCA	Proline
yHMPu5000035669_pachysolen_tannophilus_160613_g004403.m1	4236	ATGGTTAACGTTCCAAAAACAAGAAAAACTTACTGTAAAGGTAAGCAATGTCGTAAGCATACCCAACACAAAGTTACTCAATACAAGGCTGGTAAAGCTTCTTTATTTGCTCAGGGTAAAAGACGTTATGACCGTAAACAAAAAGGTTACGGTGGTCAAACCAAACCTATTTTCCACAAAAAGGCCAAGACTACCAAGAAAGTTGTCTTACGTTTAGAATGTGTTGCTTGTAAGACCAAGGCCCAATTAACATTGAAAAGATGTAAGCATTTCGAATTAGGTGGTGATAAAAAACAAAAAGGTCAAGCTTTACAATTTTAA	ATGGTTAACGTTCCAAAAACAAGAAAAACTTACTGTAAAGGTAAGCAATGTCGTAAGCATACCCAACACAAAGTTACTCAATACAAGGCTGGTAAAGCTTCTTTATTTGCTCAGGGTAAAAGACGTTATGACCGTAAACAAAAAGGTTACGGTGGTCAAACCAAACCTATTTTCCACAAAAAGGCCAAGACTACCAAGAAAGTTGTCTTACGTTTAGAATGTGTTGCTTGTAAGACCAAGGCCCAATTAACATTGAAAAGATGTAAGCATTTCGAATTAGGTGGTGATAAAAAACAAAAAGGTCAAGCTTTACAATTTTAA	151		151	GGTGGTCAAACCAAA	VALID	CCT	Proline
yHMPu5000041855_candida_ascalaphidarum_170307_g000153.m1	4236	ATGGTTAACGTCCCCAAGACTAGAAAGACCTACTGCAAGGGCAAGCTGTGCAGAAAGCACACTCAGCACAAGGTCACCCAATACAAGGCTGGTAAGGCCTCCTTGTACGCTCAGGGTAAGAGAAGATACGACCGTAAGCAGTCCGGTTACGGTGGTCAGACCAAGCCTGTTTTCCACAAGAAGGCTAAGACCACCAAGAAGGTTGTGTTGAGATTGGAGTGCGTTGACTGCAAGACCAAGGCTCAGTTGACCTTGAAGAGATGCAAGCACTTCGAGTTGGGTGGTGACAAGAAGCAGAAGGGCCAGGCCTTGCAGTTCTAA	ATGGTTAACGTCCCCAAGACTAGAAAGACCTACTGCAAGGGCAAGCTGTGCAGAAAGCACACTCAGCACAAGGTCACCCAATACAAGGCTGGTAAGGCCTCCTTGTACGCTCAGGGTAAGAGAAGATACGACCGTAAGCAGTCCGGTTACGGTGGTCAGACCAAGCCTGTTTTCCACAAGAAGGCTAAGACCACCAAGAAGGTTGTGTTGAGATTGGAGTGCGTTGACTGCAAGACCAAGGCTCAGTTGACCTTGAAGAGATGCAAGCACTTCGAGTTGGGTGGTGACAAGAAGCAGAAGGGCCAGGCCTTGCAGTTCTAA	#VALUE!	151	#VALUE!	#VALUE!	#VALUE!	#VALUE!	#VALUE!
yHMPu5000035016_candida_bolitotheri_160519_g004988.m1	4236	ATGGTTAACGTCCCAAAAACTAGAAAGACCTACTGTAAGGGTAAGGAATGTCGTAAGCACACCCAACACAAGGTTACCCAATACAAGGCTGGTAAGGCTTCTTTGTTCGCTCAAGGTAAGAGAAGATATGACCGTAAGCAAAAGGGTTACGGTGGTCAAACCAAGCCAGTTTTCCACAAGAAGGCTAAGACTACCAAGAAGGTTGTCTTGAGATTGGAATGTGTCAACTGTAAGACCAGAGCTCAACTTTCTTTGAAGAGATGTAAGCACTTCGAATTGGGTGGTGACAAGAAGCAAAAGGGTCAAGCTTTGCAATTCTAG	ATGGTTAACGTCCCAAAAACTAGAAAGACCTACTGTAAGGGTAAGGAATGTCGTAAGCACACCCAACACAAGGTTACCCAATACAAGGCTGGTAAGGCTTCTTTGTTCGCTCAAGGTAAGAGAAGATATGACCGTAAGCAAAAGGGTTACGGTGGTCAAACCAAGCCAGTTTTCCACAAGAAGGCTAAGACTACCAAGAAGGTTGTCTTGAGATTGGAATGTGTCAACTGTAAGACCAGAGCTCAACTTTCTTTGAAGAGATGTAAGCACTTCGAATTGGGTGGTGACAAGAAGCAAAAGGGTCAAGCTTTGCAATTCTAG	151		151	GGTGGTCAAACCAAG	VALID	CCA	Proline
yHMPu5000037223_hyphopichia_buzzinii_210210_g006138.m1	4236	ATGGTGAACGTTCCAAAAACCAGAAAAACCTACTGCAAAGGTAAAGAATGCCGTAAGCACACCCAACACAAGGTGACCCAATACAAGGCCGGTAAAGCTTCTTTGTTCGCTCAAGGTAAGAGAAGATATGACCGTAAGCAAAAAGGTTACGGTGGTCAAACCAAGCCAGTTTTCCACAAGAAAGCTAAGACTACCAAGAAGGTTGTCTTGAGATTGGAATGTGTCAACTGTAAAACCAAGGCCCAATTATCCTTAAAGAGATGTAAGCACTTCGAATTGGGTGGTGACAAGAAACAAAAGGGTCAAGCTTTACAATTTTAA	ATGGTGAACGTTCCAAAAACCAGAAAAACCTACTGCAAAGGTAAAGAATGCCGTAAGCACACCCAACACAAGGTGACCCAATACAAGGCCGGTAAAGCTTCTTTGTTCGCTCAAGGTAAGAGAAGATATGACCGTAAGCAAAAAGGTTACGGTGGTCAAACCAAGCCAGTTTTCCACAAGAAAGCTAAGACTACCAAGAAGGTTGTCTTGAGATTGGAATGTGTCAACTGTAAAACCAAGGCCCAATTATCCTTAAAGAGATGTAAGCACTTCGAATTGGGTGGTGACAAGAAACAAAAGGGTCAAGCTTTACAATTTTAA	151		151	GGTGGTCAAACCAAG	VALID	CCA	Proline
yHMPu5000035688_Cyberlindnera_xylosilytica_SPADES_g000194.m1	4236	ATGGTTAACGTTCCAAAGACCAGAAGAACCTACTGTAAGGGTAAGGAGTGCCGCAAGCACACCCAGCACAAGGTCACTCAGTACAAGGCTGGTAAGGCTTCCCTTTTCGCTCAGGGTAAGCGTCGTTACGACCGTAAGCAGTCCGGTTACGGTGGTCAGACCAAGCCAGTCTTCCATAAGAAGGCTAAGACCACCAAGAAGGTCGTCCTCAGATTGGAGTGTGTCAACTGTAAGACCAAGGCTCAACTTGCTTTGAAGAGATGTAAGCACTTCGAGCTTGGTGGTGACAAGAAGCAGAAGGGTCAGGCTTTGCAGTTCTAA	ATGGTTAACGTTCCAAAGACCAGAAGAACCTACTGTAAGGGTAAGGAGTGCCGCAAGCACACCCAGCACAAGGTCACTCAGTACAAGGCTGGTAAGGCTTCCCTTTTCGCTCAGGGTAAGCGTCGTTACGACCGTAAGCAGTCCGGTTACGGTGGTCAGACCAAGCCAGTCTTCCATAAGAAGGCTAAGACCACCAAGAAGGTCGTCCTCAGATTGGAGTGTGTCAACTGTAAGACCAAGGCTCAACTTGCTTTGAAGAGATGTAAGCACTTCGAGCTTGGTGGTGACAAGAAGCAGAAGGGTCAGGCTTTGCAGTTCTAA	#VALUE!	151	#VALUE!	#VALUE!	#VALUE!	#VALUE!	#VALUE!
yHMH407_Schwanniomyces_sp_nov_plate33_DISCOVAR_g003633.m1	4236	ATGGTTAACGTTCCAAAGACCAGAAAGACCTACTGTAAGGGTAAACAATGCCGTAAGCACACCCAGCACAAGGTTACCCAATACAAGGCTGGTAAGGCTTCCTTATTCGCCCAAGGTAAGAGAAGATATGACCGTAAACAATCTGGTTTCGGTGGTCAAACTAAACCAGTTTTCCACAAGAAAGCTAAGACTACCAAGAAGGTTGTCTTGAGATTGGAATGTGTTGTTTGCAAGACCAAGGCTCAATTATGCTTAAAGAGATGTAAGCACTTCGAATTAGGTGGTGACAAGAAACAAAAGGGTCAAGCTTTACAATTTTAA	ATGGTTAACGTTCCAAAGACCAGAAAGACCTACTGTAAGGGTAAACAATGCCGTAAGCACACCCAGCACAAGGTTACCCAATACAAGGCTGGTAAGGCTTCCTTATTCGCCCAAGGTAAGAGAAGATATGACCGTAAACAATCTGGTTTCGGTGGTCAAACTAAACCAGTTTTCCACAAGAAAGCTAAGACTACCAAGAAGGTTGTCTTGAGATTGGAATGTGTTGTTTGCAAGACCAAGGCTCAATTATGCTTAAAGAGATGTAAGCACTTCGAATTAGGTGGTGACAAGAAACAAAAGGGTCAAGCTTTACAATTTTAA	151		151	GGTGGTCAAACTAAA	VALID	CCA	Proline
yHMPu5000038086_Candida_palmyrensis_SPADES_g000737.m1	4236	ATGGTTAACGTTCCAAAGACCAGAAAGACCTACTGCAAGGGTAAGCAGTGCCGCAAGCACACCCAGCACAAGGTTACCCAATACAAGGCTGGTAAGGCTTCCTTATTTGCCCAGGGTAAGAGAAGATATGACCGTAAACAGTCCGGTTTCGGTGGTCAGACCAAGCCCGTTTTCCACAAGAAAGCTAAGACTACCAAGAAGGTTGTCTTGAGATTGGAATGTGTTGTCTGCAAGACCAAGGCTCAATTGTGCTTGAAGAGATGTAAGCACTTCGAATTGGGTGGTGACAAGAAGCAAAAGGGTCAAGCCTTGCAATTTTAA	ATGGTTAACGTTCCAAAGACCAGAAAGACCTACTGCAAGGGTAAGCAGTGCCGCAAGCACACCCAGCACAAGGTTACCCAATACAAGGCTGGTAAGGCTTCCTTATTTGCCCAGGGTAAGAGAAGATATGACCGTAAACAGTCCGGTTTCGGTGGTCAGACCAAGCCCGTTTTCCACAAGAAAGCTAAGACTACCAAGAAGGTTGTCTTGAGATTGGAATGTGTTGTCTGCAAGACCAAGGCTCAATTGTGCTTGAAGAGATGTAAGCACTTCGAATTGGGTGGTGACAAGAAGCAAAAGGGTCAAGCCTTGCAATTTTAA	#VALUE!	151	#VALUE!	#VALUE!	#VALUE!	#VALUE!	#VALUE!
yHMPu5000034657_candida_pseudoglaebosa_170307_g002951.m1	4236	ATGGTGAACGTTCCAAAAACTAGAAAAACCTACTGTAAAGGTAAACAATGTAGAAAACACACTCAACATAAAGTTACTCAATACAAAGCCGGTAAAGCTTCCTTATTTGCTCAAGGTAAAAGAAGATATGACCGTAAACAATCCGGTTTCGGGGGTCAAACTAAACCAGTTTTCCATAAAAAAGCTAAAACTACCAAAAAAGTTGTTTTAAGATTAGAATGTATTGTTTGCAAAACCAAAGCTCAATTATGTTTAAAAAGATGTAAACATTTCGAATTAGGTGGTGATAAAAAACAAAAAGGTCAAGCTTTACAATTTTAG	ATGGTGAACGTTCCAAAAACTAGAAAAACCTACTGTAAAGGTAAACAATGTAGAAAACACACTCAACATAAAGTTACTCAATACAAAGCCGGTAAAGCTTCCTTATTTGCTCAAGGTAAAAGAAGATATGACCGTAAACAATCCGGTTTCGGGGGTCAAACTAAACCAGTTTTCCATAAAAAAGCTAAAACTACCAAAAAAGTTGTTTTAAGATTAGAATGTATTGTTTGCAAAACCAAAGCTCAATTATGTTTAAAAAGATGTAAACATTTCGAATTAGGTGGTGATAAAAAACAAAAAGGTCAAGCTTTACAATTTTAG	151		151	GGGGGTCAAACTAAA	VALID	CCA	Proline
yHMPu5000035328_candida_palmioleophila_180604_g003773.m1	4236	ATGGTTAACGTTCCAAAAACTAGAAAAACCTTTTGCAAGGGTAAAGAATGCAGAAAGCACACTCAACATAAAGTTACTCAATATAAAGCTGGTAAGGCTTCCTTATTCGCTCAAGGTAAGAGAAGATATGACCGTAAACAATCCGGTTTCGGTGGTCAAACCAAACCAGTTTTCCACAAGAAAGCTAAGACTACCAAGAAGGTTGTCTTAAGATTGGAATGTGTTGTCTGTAAGACCAAGGCTCAATTATGTTTAAAGAGATGTAAACATTTCGAATTGGGTGGTGACAAAAAACAAAAAGGTCAAGCTTTACAATTTTAA	ATGGTTAACGTTCCAAAAACTAGAAAAACCTTTTGCAAGGGTAAAGAATGCAGAAAGCACACTCAACATAAAGTTACTCAATATAAAGCTGGTAAGGCTTCCTTATTCGCTCAAGGTAAGAGAAGATATGACCGTAAACAATCCGGTTTCGGTGGTCAAACCAAACCAGTTTTCCACAAGAAAGCTAAGACTACCAAGAAGGTTGTCTTAAGATTGGAATGTGTTGTCTGTAAGACCAAGGCTCAATTATGTTTAAAGAGATGTAAACATTTCGAATTGGGTGGTGACAAAAAACAAAAAGGTCAAGCTTTACAATTTTAA	151		151	GGTGGTCAAACCAAA	VALID	CCA	Proline
yHMPu5000038381_candida_manassasensis_170713_g002016.m1	4236	ATGGTTAACGTTCCAAAAACTAGAAAAACCTTTTGCAAGGGTAAAGAATGCAGAAAGCACACCCAACACAAAGTTACTCAATATAAAGCTGGTAAGGCTTCCTTATTCGCTCAAGGTAAGAGAAGATATGACCGTAAACAATCCGGTTTCGGTGGTCAAACCAAACCAGTTTTCCACAAGAAAGCTAAGACTACCAAGAAGGTTGTCTTGAGATTGGAATGTGTTGTCTGTAAGACCAAGGCCCAATTATGCTTAAAGAGATGTAAACACTTCGAATTGGGTGGTGACAAGAAACAAAAAGGTCAAGCTTTACAATTTTAA	ATGGTTAACGTTCCAAAAACTAGAAAAACCTTTTGCAAGGGTAAAGAATGCAGAAAGCACACCCAACACAAAGTTACTCAATATAAAGCTGGTAAGGCTTCCTTATTCGCTCAAGGTAAGAGAAGATATGACCGTAAACAATCCGGTTTCGGTGGTCAAACCAAACCAGTTTTCCACAAGAAAGCTAAGACTACCAAGAAGGTTGTCTTGAGATTGGAATGTGTTGTCTGTAAGACCAAGGCCCAATTATGCTTAAAGAGATGTAAACACTTCGAATTGGGTGGTGACAAGAAACAAAAAGGTCAAGCTTTACAATTTTAA	151		151	GGTGGTCAAACCAAA	VALID	CCA	Proline
yHMPu5000038344_debaryomyces_singareniensis_170713_g002079.m1	4236	ATGGTTAACGTTCCAAAGACTAGAAAGACCTACTGTAAGGGTAAGGGATGTCGTAAGCACACCCAGCATAAGGTTACCCAATACAAAGCCGGTAAAGCTTCCTTGTTCGCTCAAGGTAAGAGAAGATATGACCGTAAGCAAAAGGGTTTCGGTGGTCAAACCAAGCCAGTTTTCCACAAGAAAGCTAAGACTACCAAGAAGGTTGTCTTGAGATTGGAATGTGTTGTCTGCAAGACCAAGGCTCAATTATGTTTGAAGAGATGTAAGCACTTTGAATTGGGTGGTGACAAGAAGCAAAAGGGTCAAGCTTTACAATTTTAA	ATGGTTAACGTTCCAAAGACTAGAAAGACCTACTGTAAGGGTAAGGGATGTCGTAAGCACACCCAGCATAAGGTTACCCAATACAAAGCCGGTAAAGCTTCCTTGTTCGCTCAAGGTAAGAGAAGATATGACCGTAAGCAAAAGGGTTTCGGTGGTCAAACCAAGCCAGTTTTCCACAAGAAAGCTAAGACTACCAAGAAGGTTGTCTTGAGATTGGAATGTGTTGTCTGCAAGACCAAGGCTCAATTATGTTTGAAGAGATGTAAGCACTTTGAATTGGGTGGTGACAAGAAGCAAAAGGGTCAAGCTTTACAATTTTAA	151		151	GGTGGTCAAACCAAG	VALID	CCA	Proline
yHMPu5000034645_candida_boleticola_201018_g005612.m1	4236	ATGGTTAACGTTCCAAAGACCAGAAAGACCTACTGTAAGGGTAAGCAATGTCTCAAGCACACTCAACACAAGGTTACTCAATACAAGGCTGGTAAGGCTTCCTTATTCGCCCAAGGTAAGAGAAGATATGACCGTAAGCAATCTGGTTTCGGTGGTCAAACCAAGCCAGTTTTCCACAAGAAGGCTAAGACTACCAAGAAGGTTGTCTTAAGATTAGAATGTGTTGTCTGTAAGACCAAGGCTCAATTATCATTAAAGAGATGTAAGCACTTCGAATTAGGTGGTGACAAGAAGCAAAAGGGTCAAGCCTTACAATTTTAA	ATGGTTAACGTTCCAAAGACCAGAAAGACCTACTGTAAGGGTAAGCAATGTCTCAAGCACACTCAACACAAGGTTACTCAATACAAGGCTGGTAAGGCTTCCTTATTCGCCCAAGGTAAGAGAAGATATGACCGTAAGCAATCTGGTTTCGGTGGTCAAACCAAGCCAGTTTTCCACAAGAAGGCTAAGACTACCAAGAAGGTTGTCTTAAGATTAGAATGTGTTGTCTGTAAGACCAAGGCTCAATTATCATTAAAGAGATGTAAGCACTTCGAATTAGGTGGTGACAAGAAGCAAAAGGGTCAAGCCTTACAATTTTAA	151		151	GGTGGTCAAACCAAG	VALID	CCA	Proline
yHMPu5000034643_Candida_schatavii_SPAdes_g004433.m1	4236	ATGTTAGCTTGGCTCTCAAAATTCCTGCTTAACGTTCCAAAGACCAGAAAGACCTACTGTAAGGGTAAGCAATGTCTCAAGCACACCCAGCACAAGGTTACCCAATACAAGGCTGGTAAGGCTTCCTTGTTCGCCCAGGGTAAGAGAAGATATGACCGTAAGCAGTCTGGTTTTGGTGGTCAAACCAAGCCAGTTTTCCACAAGAAGGCCAAGACCACCAAGAAGGTTGTCTTGAGATTGGAATGTGTTGTTTGCAAGACCAAGGCTCAATTATCTTTGAAGAGATGTAAGCACTTCGAATTAGGTGGTGACAAGAAGCAAAAGGGTCAAGCCTTACAGTTTTAA	ATGTTAGCTTGGCTCTCAAAATTCCTGCTTAACGTTCCAAAGACCAGAAAGACCTACTGTAAGGGTAAGCAATGTCTCAAGCACACCCAGCACAAGGTTACCCAATACAAGGCTGGTAAGGCTTCCTTGTTCGCCCAGGGTAAGAGAAGATATGACCGTAAGCAGTCTGGTTTTGGTGGTCAAACCAAGCCAGTTTTCCACAAGAAGGCCAAGACCACCAAGAAGGTTGTCTTGAGATTGGAATGTGTTGTTTGCAAGACCAAGGCTCAATTATCTTTGAAGAGATGTAAGCACTTCGAATTAGGTGGTGACAAGAAGCAAAAGGGTCAAGCCTTACAGTTTTAA	175		175	GGTGGTCAAACCAAG	VALID	CCA	Proline
yHMPu5000034650_candida_mesenterica_180604_g001331.m1	4236	ATGGTTAACGTCCCAAAAACTAGAAAGACCTTCTGTAAGGGTAAGGAATGCAGAAAGCACACCACCCACAAGGTTACTCAATACAAGGCTGGTAAGGCTTCTTTGTTTGCCCAAGGTAAGAGAAGATATGACAGAAAGCAAAAGGGTTTCGGTGGTCAAACTAAGCCAGTTTTCCACAAGAAGGCTAAGACCACCAAGAAGGTTGTCTTGAGATTGGAATGTATTGTCTGTAAGACCAAGGCTCAATTGTCATTGAAGAGATGTAAGCACTTCGAATTAGGTGGTGACAAGAAGCAAAAGGGTCAAGCTTTACAATTTTAA	ATGGTTAACGTCCCAAAAACTAGAAAGACCTTCTGTAAGGGTAAGGAATGCAGAAAGCACACCACCCACAAGGTTACTCAATACAAGGCTGGTAAGGCTTCTTTGTTTGCCCAAGGTAAGAGAAGATATGACAGAAAGCAAAAGGGTTTCGGTGGTCAAACTAAGCCAGTTTTCCACAAGAAGGCTAAGACCACCAAGAAGGTTGTCTTGAGATTGGAATGTATTGTCTGTAAGACCAAGGCTCAATTGTCATTGAAGAGATGTAAGCACTTCGAATTAGGTGGTGACAAGAAGCAAAAGGGTCAAGCTTTACAATTTTAA	151		151	GGTGGTCAAACTAAG	VALID	CCA	Proline
yHMPu5000034652_candida_derodonti_SPADES_g001158.m1	4236	ATGGTTAACGTCCCAAAAACTAGAAAGACCTTCTGTAAGGGTAAGGAATGTAGAAAGCACACCACCCACAAGGTTACCCAATACAAGGCTGGTAAAGCTTCTTTGTTTGCCCAAGGTAAGAGAAGATATGACAGAAAACAAAAGGGTTTCGGAGGTCAAACCAAGCCAGTTTTCCACAAGAAAGCTAAGACCACCAAGAAGGTTGTTTTAAGATTGGAATGTATTGTCTGTAAGACCAAGGCTCAATTATCATTAAAGAGATGTAAGCACTTCGAATTAGGTGGTGACAAGAAGCAAAAGGGTCAAGCTTTACAATTTTAA	ATGGTTAACGTCCCAAAAACTAGAAAGACCTTCTGTAAGGGTAAGGAATGTAGAAAGCACACCACCCACAAGGTTACCCAATACAAGGCTGGTAAAGCTTCTTTGTTTGCCCAAGGTAAGAGAAGATATGACAGAAAACAAAAGGGTTTCGGAGGTCAAACCAAGCCAGTTTTCCACAAGAAAGCTAAGACCACCAAGAAGGTTGTTTTAAGATTGGAATGTATTGTCTGTAAGACCAAGGCTCAATTATCATTAAAGAGATGTAAGCACTTCGAATTAGGTGGTGACAAGAAGCAAAAGGGTCAAGCTTTACAATTTTAA	151		151	GGAGGTCAAACCAAG	VALID	CCA	Proline
yHMPu5000038082_candida_suecica_180604_g004438.m1	4236	ATGGTTAACGTCCCAAAAACTAGAAAGACCTACTGTAAGGGTAAGGAGTGCAGAAAGCACACCACCCACAAGGTTACCCAATACAAGGCTGGTAAGGCTTCTTTGTTTGCCCAAGGTAAGAGAAGATATGACAGAAAGCAAAAGGGTTTCGGTGGTCAAACTAAGCCAGTTTTCCACAAGAAGGCCAAGACCACCAAGAAGGTTGTCTTGAGATTGGAATGTATCGTCTGTAAGACCAAGGCTCAATTATCCTTGAAGAGATGTAAGCACTTCGAATTAGGTGGTGACAAGAAGCAAAAGGGTCAAGCTTTACAATTTTAA	ATGGTTAACGTCCCAAAAACTAGAAAGACCTACTGTAAGGGTAAGGAGTGCAGAAAGCACACCACCCACAAGGTTACCCAATACAAGGCTGGTAAGGCTTCTTTGTTTGCCCAAGGTAAGAGAAGATATGACAGAAAGCAAAAGGGTTTCGGTGGTCAAACTAAGCCAGTTTTCCACAAGAAGGCCAAGACCACCAAGAAGGTTGTCTTGAGATTGGAATGTATCGTCTGTAAGACCAAGGCTCAATTATCCTTGAAGAGATGTAAGCACTTCGAATTAGGTGGTGACAAGAAGCAAAAGGGTCAAGCTTTACAATTTTAA	151		151	GGTGGTCAAACTAAG	VALID	CCA	Proline
yHMPu5000041789_scheffersomyces_ergatensis_180604_g000683.m1	4236	ATGGTTAACGTTCCAAAAACTAGAAAGACCTACTGTAAAGGTAAGGAATGCAGAAAACATACTGTTCATAAAGTTTCTCAATATAAAGCTGGTAAAGCTTCCTTATTTGCCCAAGGTAAAAGAAGATATGACCGTAAACAAAGAGGTTTCGGTGGTCAAACCAAGCCAGTTTTCCACAAGAAAGCTAAGACTACCAAGAAGGTTGTTTTAAGATTGGAATGTCTTGTTTGTAAGACCAAAGCTCAATTATCCTTAAAGAGATGTAAACATTTCGAATTGGGTGGTGATAAAAAACAAAAGGGTCAAGCTTTACAATTTTAA	ATGGTTAACGTTCCAAAAACTAGAAAGACCTACTGTAAAGGTAAGGAATGCAGAAAACATACTGTTCATAAAGTTTCTCAATATAAAGCTGGTAAAGCTTCCTTATTTGCCCAAGGTAAAAGAAGATATGACCGTAAACAAAGAGGTTTCGGTGGTCAAACCAAGCCAGTTTTCCACAAGAAAGCTAAGACTACCAAGAAGGTTGTTTTAAGATTGGAATGTCTTGTTTGTAAGACCAAAGCTCAATTATCCTTAAAGAGATGTAAACATTTCGAATTGGGTGGTGATAAAAAACAAAAGGGTCAAGCTTTACAATTTTAA	151		151	GGTGGTCAAACCAAG	VALID	CCA	Proline
yHMPu5000035315_candida_arcana_180604_g001000.m1	4236	ATGCAACTTTCATTCCTTATAACTTTAGCCACCGCTAGCTTGGTTCTTTCCGCGCCTGTTAACAAGCGTGATGATGATGATGGTCCAGTTGTTGTACATTTGACAACCACAGTCAAGAGTTTGAAAACAAACGTTTTGACTGTCGCTGCTCCCACCAACATTCAAACTGACTTGAAAATTAATACTTCAACTAAGACTTTTACAAGGTATACTGCCACAGTCACTTCTACTATTTTTGGTTCCCTTGTTACATTTGTTACAACTGCTACTACACCAATTGTGAATGACTCTGGAACCGTTGCCCCAATTGCAACAAGCACACCGGCTACAAGTGATGTGCCAGTTACCACTTCAACCCCCGTCACCACTGTTTCTTCTCCTACCACTGCCACAACCACA…	ATGCAACTTTCATTCCTTATAACTTTAGCCACCGCTAGCTTGGTTCTTTCCGCGCCTGTTAACAAGCGTGATGATGATGATGGTCCAGTTGTTGTACATTTGACAACCACAGTCAAGAGTTTGAAAACAAACGTTTTGACTGTCGCTGCTCCCACCAACATTCAAACTGACTTGAAAATTAATACTTCAACTAAGACTTTTACAAGGTATACTGCCACAGTCACTTCTACTATTTTTGGTTCCCTTGTTACATTTGTTACAACTGCTACTACACCAATTGTGAATGACTCTGGAACCGTTGCCCCAATTGCAACAAGCACACCGGCTACAAGTGATGTGCCAGTTACCACTTCAACCCCCGTCACCACTGTTTCTTCTCCTACCACTGCCACAACCACA…	880		880	GGGGGTCAAACCAAG	VALID	CCA	Proline
yHMPu5000037864_metschnikowia_viticola_201018_g006399.m1	4236	AACGTTCCAAAGCTTAGAAGAACCTTCTGTAAGGGTAAGGAATGCCGCAAGCACACCCAGCACAAGGTCACCCAATACAAGGCTGGTAAGGCTTCTTTGTTTGCCCAAGGTAAGAGAAGATACGACCGTAAGCAGTCCGGTTTCGGTGGTCAGACCAAGCCAGTTTTCCACAAAAAGGCCAAGACCACCAAGAAGGTTGTCTTGAGATTGGAGTGTGTCAACTGTAAGACCAAGGCCCAACTCTCCTTGAAGAGATGTAAGCACTTCGAGTTGGGTGGTGACAAGAAGCAAAAGGGTCAAGCTTTGCAATTTTAA	AACGTTCCAAAGCTTAGAAGAACCTTCTGTAAGGGTAAGGAATGCCGCAAGCACACCCAGCACAAGGTCACCCAATACAAGGCTGGTAAGGCTTCTTTGTTTGCCCAAGGTAAGAGAAGATACGACCGTAAGCAGTCCGGTTTCGGTGGTCAGACCAAGCCAGTTTTCCACAAAAAGGCCAAGACCACCAAGAAGGTTGTCTTGAGATTGGAGTGTGTCAACTGTAAGACCAAGGCCCAACTCTCCTTGAAGAGATGTAAGCACTTCGAGTTGGGTGGTGACAAGAAGCAAAAGGGTCAAGCTTTGCAATTTTAA	#VALUE!	145	#VALUE!	#VALUE!	#VALUE!	#VALUE!	#VALUE!
yHMPu5000040947_metschnikowia_gruessii_201018_g000166.m1	4236	AACGTTCCAAAGCTTAGAAGAACCTTTTGCAAGGGTAAGGAATGCCGTAAGCACACTCAACACAAGGTCACCCAATACAAGGCTGGTAAGGCTTCTTTGTTCGCTCAAGGTAAGAGAAGATACGACCGTAAGCAATCCGGTTTCGGTGGTCAAACCAAGCCAGTTTTCCACAAAAAGGCCAAGACCACCAAGAAGGTTGTCTTGAGATTGGAGTGTGTCAACTGTAAGACCAAGGCTCAATTGTCCTTGAAGAGATGTAAGCACTTCGAGTTGGGTGGTGACAAGAAGCAAAAGGGTCAAGCTTTGCAATTTTAA	AACGTTCCAAAGCTTAGAAGAACCTTTTGCAAGGGTAAGGAATGCCGTAAGCACACTCAACACAAGGTCACCCAATACAAGGCTGGTAAGGCTTCTTTGTTCGCTCAAGGTAAGAGAAGATACGACCGTAAGCAATCCGGTTTCGGTGGTCAAACCAAGCCAGTTTTCCACAAAAAGGCCAAGACCACCAAGAAGGTTGTCTTGAGATTGGAGTGTGTCAACTGTAAGACCAAGGCTCAATTGTCCTTGAAGAGATGTAAGCACTTCGAGTTGGGTGGTGACAAGAAGCAAAAGGGTCAAGCTTTGCAATTTTAA	145		145	GGTGGTCAAACCAAG	VALID	CCA	Proline
yHMPu5000041803_Metschnikowia_zizyphicola_SPADES.haplomerger2_g001305.m1	4236	ATGTTATGTACGCTTTTCAAATTGCAAGATCTACCCCTATTTAACGTTCCAAAGCTTAGAAGAACTTTCTGTAAGGGTAAGGAGTGCCGCAAGCACACCCAGCACAAGGTCACCCAATACAAGGCTGGTAAGGCTTCTTTGTTCGCCCAGGGTAAGAGAAGATACGACCGTAAGCAGTCCGGTTTCGGTGGTCAGACCAAGCCCGTTTTCCACAAAAAGGCCAAGACCACCAAGAAGGTTGTCTTGAGATTGGAGTGTGTCAACTGCAAGACCAAGGCTCAGTTGTCCTTGAAGAGATGTAAGCACTTCGAGTTGGGTGGTGACAAGAAGCAGAAGGGCCAGGCTTTGCAATTTTAA	ATGTTATGTACGCTTTTCAAATTGCAAGATCTACCCCTATTTAACGTTCCAAAGCTTAGAAGAACTTTCTGTAAGGGTAAGGAGTGCCGCAAGCACACCCAGCACAAGGTCACCCAATACAAGGCTGGTAAGGCTTCTTTGTTCGCCCAGGGTAAGAGAAGATACGACCGTAAGCAGTCCGGTTTCGGTGGTCAGACCAAGCCCGTTTTCCACAAAAAGGCCAAGACCACCAAGAAGGTTGTCTTGAGATTGGAGTGTGTCAACTGCAAGACCAAGGCTCAGTTGTCCTTGAAGAGATGTAAGCACTTCGAGTTGGGTGGTGACAAGAAGCAGAAGGGCCAGGCTTTGCAATTTTAA	#VALUE!	187	#VALUE!	#VALUE!	#VALUE!	#VALUE!	#VALUE!
yHMPu5000041803_Metschnikowia_zizyphicola_SPADES.haplomerger2_g001310.m1	4236	ATGTTACGCACGCTTTTCAAATTGCAAGATTTACCCACATTTAACGTTCCAAAGCTTAGAAGAACTTTCTGTAAGGGTAAGGAGTGCCGCAAGCACACCCAGCACAAGGTCACCCAATACAAGGCTGGTAAGGCTTCCTTGTTCGCCCAGGGTAAGAGAAGATACGACCGTAAGCAGTCCGGTTTCGGTGGTCAGACCAAGCCCGTTTTCCACAAAAAGGCCAAGACCACCAAGAAGGTTGTCTTGAGATTGGAGTGTGTCAACTGCAAGACCAAGGCTCAGTTGTCCTTGAAGAGATGTAAGCACTTCGAGTTGGGTGGTGACAAGAAGCAGAAGGGCCAGGCTTTGCAATTTTAA	ATGTTACGCACGCTTTTCAAATTGCAAGATTTACCCACATTTAACGTTCCAAAGCTTAGAAGAACTTTCTGTAAGGGTAAGGAGTGCCGCAAGCACACCCAGCACAAGGTCACCCAATACAAGGCTGGTAAGGCTTCCTTGTTCGCCCAGGGTAAGAGAAGATACGACCGTAAGCAGTCCGGTTTCGGTGGTCAGACCAAGCCCGTTTTCCACAAAAAGGCCAAGACCACCAAGAAGGTTGTCTTGAGATTGGAGTGTGTCAACTGCAAGACCAAGGCTCAGTTGTCCTTGAAGAGATGTAAGCACTTCGAGTTGGGTGGTGACAAGAAGCAGAAGGGCCAGGCTTTGCAATTTTAA	#VALUE!	187	#VALUE!	#VALUE!	#VALUE!	#VALUE!	#VALUE!
yHMPu5000038328_Metschnikowia_henanensis_SPADES.haplomerger2_g002321.m1	4236	ATGAAGGCTGCTGCCCTCACCCCCAGCGCCACGCATGCTCCAGGTACCGGCGGAATCCTGCGTACAACCCTTAACGTTCCAAAGCTTAGAAGAACCTTCTGTAAGGGTAAGGAATGCCGCAAGCACACCCAACACAAGGTCACCCAATACAAGGCTGGTAAGGCTTCTTTGTTTGCCCAAGGTAAGAGAAGATACGACCGTAAGCAGTCCGGTTTCGGTGGTCAGACCAAGCCAGTTTTCCACAAAAAGGCCAAGACCACCAAGAAGGTTGTCTTGAGATTGGAGTGTGTCAACTGTAAGACCAAGGCCCAGCTTTCCTTGAAGAGATGTAAGCACTTCGAGTTGGGTGGTGACAAGAAGCAAAAGGGTCAAGCTTTGCAATTTTAA	ATGAAGGCTGCTGCCCTCACCCCCAGCGCCACGCATGCTCCAGGTACCGGCGGAATCCTGCGTACAACCCTTAACGTTCCAAAGCTTAGAAGAACCTTCTGTAAGGGTAAGGAATGCCGCAAGCACACCCAACACAAGGTCACCCAATACAAGGCTGGTAAGGCTTCTTTGTTTGCCCAAGGTAAGAGAAGATACGACCGTAAGCAGTCCGGTTTCGGTGGTCAGACCAAGCCAGTTTTCCACAAAAAGGCCAAGACCACCAAGAAGGTTGTCTTGAGATTGGAGTGTGTCAACTGTAAGACCAAGGCCCAGCTTTCCTTGAAGAGATGTAAGCACTTCGAGTTGGGTGGTGACAAGAAGCAAAAGGGTCAAGCTTTGCAATTTTAA	#VALUE!	217	#VALUE!	#VALUE!	#VALUE!	#VALUE!	#VALUE!
yHMPu5000035305_metschnikowia_corniflorae_180604.haplomerger2_g000344.m1	4236	ATGGGCCGTCTGTACCAGGATTTGTATGAATTAGGCCACTACGGTGGACCGGATGGGCCAGATGGGCCAGTTAACGTTCCAAAGCTTAGAAAGACTTTCTGTAAGGGTAAGGAGTGCCGTAAGCACACGCAGCACAAGGTCACCCAATACAAGGCTGGTAAGGCTTCTTTGTTTGCCCAGGGTAAGAGAAGATACGACCGTAAGCAGTCCGGTTTCGGTGGTCAGACCAAGCCAGTCTTCCACAAAAAGGCCAAGACCACCAAGAAGGTTGTCTTGAGATTGGAGTGTGTCAACTGCAAGACCAAGGCCCAATTGTCCTTGAAGAGATGTAAGCATTTCGAGTTGGGTGGAGACAAGAAGCAGAAGGGTCAAGCTTTGCAATTTTAA	ATGGGCCGTCTGTACCAGGATTTGTATGAATTAGGCCACTACGGTGGACCGGATGGGCCAGATGGGCCAGTTAACGTTCCAAAGCTTAGAAAGACTTTCTGTAAGGGTAAGGAGTGCCGTAAGCACACGCAGCACAAGGTCACCCAATACAAGGCTGGTAAGGCTTCTTTGTTTGCCCAGGGTAAGAGAAGATACGACCGTAAGCAGTCCGGTTTCGGTGGTCAGACCAAGCCAGTCTTCCACAAAAAGGCCAAGACCACCAAGAAGGTTGTCTTGAGATTGGAGTGTGTCAACTGCAAGACCAAGGCCCAATTGTCCTTGAAGAGATGTAAGCATTTCGAGTTGGGTGGAGACAAGAAGCAGAAGGGTCAAGCTTTGCAATTTTAA	#VALUE!	217	#VALUE!	#VALUE!	#VALUE!	#VALUE!	#VALUE!
yHMPu5000040934_metschnikowia_similis_201018_g005170.m1	4236	AACGTTCCAAAGCTTAGAAAAACCTACTGCAAAGGTAAGCAGTGTCGCAAGCACACCCAGCACAAGGTGACTCAATACAAGGCCGGCAAAGCCTCGTTGTTTGCTCAGGGTAAGAGAAGATACGACCGTAAGCAATCCGGTTTCGGTGGTCAGACCAAGCCTGTTTTCCACAAGAAGGCCAAGACCACCAAGAAGGTTGTGTTGAGATTGGAGTGTGTGTCCTGCAAGACCAAGGCGCAGTTGTCCTTGAAGAGATGTAAGCACTTTGAGTTGGGTGGTGACAAGAAGCAAAAGGGTCAAGCCTTGCAATTCTAA	AACGTTCCAAAGCTTAGAAAAACCTACTGCAAAGGTAAGCAGTGTCGCAAGCACACCCAGCACAAGGTGACTCAATACAAGGCCGGCAAAGCCTCGTTGTTTGCTCAGGGTAAGAGAAGATACGACCGTAAGCAATCCGGTTTCGGTGGTCAGACCAAGCCTGTTTTCCACAAGAAGGCCAAGACCACCAAGAAGGTTGTGTTGAGATTGGAGTGTGTGTCCTGCAAGACCAAGGCGCAGTTGTCCTTGAAGAGATGTAAGCACTTTGAGTTGGGTGGTGACAAGAAGCAAAAGGGTCAAGCCTTGCAATTCTAA	#VALUE!	145	#VALUE!	#VALUE!	#VALUE!	#VALUE!	#VALUE!
metschnikowia_santaceciliae_g004922.m1	4236	ATGGTGCTTGAGAAAAAGAGAGAGTTTAACGTTCCTAAGCTTAGAAAGACGTACTGCAAAGGTAAGCAGTGTCGCAAGCACACCCAACACAAGGTGACGCAATACAAGGCCGGTAAGGCCTCTTTGTTTGCCCAGGGTAAGAGAAGATACGACCGTAAGCAATCCGGTTTCGGTGGTCAGACCAAGCCCGTTTTCCACAAGAAGGCCAAGACTACCAAGAAGGTTGTGTTGAGATTGGAGTGTGTTGCCTGCAAGACCAAGGCTCAATTGTCCTTGAAGAGATGTAAGCACTTCGAGTTGGGTGGAGACAAGAAGCAAAAGGGTCAAGCCTTGCAATTCTAA	ATGGTGCTTGAGAAAAAGAGAGAGTTTAACGTTCCTAAGCTTAGAAAGACGTACTGCAAAGGTAAGCAGTGTCGCAAGCACACCCAACACAAGGTGACGCAATACAAGGCCGGTAAGGCCTCTTTGTTTGCCCAGGGTAAGAGAAGATACGACCGTAAGCAATCCGGTTTCGGTGGTCAGACCAAGCCCGTTTTCCACAAGAAGGCCAAGACTACCAAGAAGGTTGTGTTGAGATTGGAGTGTGTTGCCTGCAAGACCAAGGCTCAATTGTCCTTGAAGAGATGTAAGCACTTCGAGTTGGGTGGAGACAAGAAGCAAAAGGGTCAAGCCTTGCAATTCTAA	#VALUE!	172	#VALUE!	#VALUE!	#VALUE!	#VALUE!	#VALUE!
yHMPu5000040945_metschnikowia_dekortorum_201018_g000623.m1	4236	ATGAAGAAGCCGATTCCGGTGGACGAGCCGTTCCCTGCACTTTCATGTTATGGAAAACCCCTTTTGTCCAAGACGCGACGCTTCAACCTAGCATTCTCTCATGCCCAGCGCGTAGCCAAGGTTCCGGGAACAAAGGCGCTTACTTCTTTGGAGAAGTTGAGTGGGATTTTCGGCATATCGGCACAAGATAATGGCCGCCCTCAGTTCACGGAGTTGTCTCAGAACTTGGACCCTGCTCGGGAAAAGAATGCTGCCGCCAACGGCTCTGGTGTTTCCGGTTCCGTAAGGCCTGGTTTGGGGAAGAAGACGGCCGACATCATAACCGAAGAGCAGCCCTCCAGATATGAAGAATCAGGAACAAAAGAGCCTTTGGGTAAGGAGGGAATTGCTAAAGCGGCT…	ATGAAGAAGCCGATTCCGGTGGACGAGCCGTTCCCTGCACTTTCATGTTATGGAAAACCCCTTTTGTCCAAGACGCGACGCTTCAACCTAGCATTCTCTCATGCCCAGCGCGTAGCCAAGGTTCCGGGAACAAAGGCGCTTACTTCTTTGGAGAAGTTGAGTGGGATTTTCGGCATATCGGCACAAGATAATGGCCGCCCTCAGTTCACGGAGTTGTCTCAGAACTTGGACCCTGCTCGGGAAAAGAATGCTGCCGCCAACGGCTCTGGTGTTTCCGGTTCCGTAAGGCCTGGTTTGGGGAAGAAGACGGCCGACATCATAACCGAAGAGCAGCCCTCCAGATATGAAGAATCAGGAACAAAAGAGCCTTTGGGTAAGGAGGGAATTGCTAAAGCGGCT…	#VALUE!	874	#VALUE!	#VALUE!	#VALUE!	#VALUE!	#VALUE!
yHMPu5000040942_Metschnikowia_colocasiae_SPADES_g001046.m1	4236	ATGCAAGCTTCCACTCGTCTCTGGCTCTACGCGTTGATTGAATTCGGTATCTCAATTGAAGCCTCTTTCAATTTGAAGACCATAGCCACTTACCTTGATCAGTTGGACTGGCTCCCTTCAAGACTTTATCACGTTAACGTTCCAAAGCTTAGAAAGACTTACTGCAAAGGTAAGCAGTGTCGTAAGCACACTCAACACAAGGTGACCCAATACAAGGCCGGTAAGGCTTCGTTGTTCGCTCAGGGTAAGAGAAGATACGACCGTAAGCAATCCGGTTTCGGTGGTCAAACCAAGCCCGTTTTCCACAAGAAGGCCAAGACCACCAAGAAGGTTGTGTTGAGATTGGAGTGTGTCACCTGCAAGACCAAGGCTCAATTGTCCTTGAAGAGATGTAAGCAC…	ATGCAAGCTTCCACTCGTCTCTGGCTCTACGCGTTGATTGAATTCGGTATCTCAATTGAAGCCTCTTTCAATTTGAAGACCATAGCCACTTACCTTGATCAGTTGGACTGGCTCCCTTCAAGACTTTATCACGTTAACGTTCCAAAGCTTAGAAAGACTTACTGCAAAGGTAAGCAGTGTCGTAAGCACACTCAACACAAGGTGACCCAATACAAGGCCGGTAAGGCTTCGTTGTTCGCTCAGGGTAAGAGAAGATACGACCGTAAGCAATCCGGTTTCGGTGGTCAAACCAAGCCCGTTTTCCACAAGAAGGCCAAGACCACCAAGAAGGTTGTGTTGAGATTGGAGTGTGTCACCTGCAAGACCAAGGCTCAATTGTCCTTGAAGAGATGTAAGCAC…	280		280	GGTGGTCAAACCAAG	VALID	CCC	Proline
yHMPu5000040951_metschnikowia_ipomoeae_201018_g003239.m1	4236	ATGACCAACCATGATCAAGTCAAAATATCAAAGAAGCAAAAAAGCAAGGAAGCAAAGAATAGTCACCTGATCACGGAGAAATTGAATTCCCAATTTAACGTTCCTAAGCTTAGAAAGACGTACTGCAAAGGTAAGCAGTGTCGCAAGCACACCCAACACAAGGTGACGCAATACAAGGCCGGTAAGGCTTCGTTGTTTGCCCAGGGTAAGAGAAGATACGACCGTAAGCAATCCGGTTTCGGTGGTCAGACCAAGCCCGTTTTCCACAAGAAGGCCAAGACCACCAAGAAGGTTGTGTTGAGATTGGAGTGTGTTGCCTGCAAGACCAAGGCCCAATTGTCCTTGAAGAGATGTAAGCACTTCGAGTTGGGTGGAGACAAGAAGCAAAAGGGTCAAGCC…	ATGACCAACCATGATCAAGTCAAAATATCAAAGAAGCAAAAAAGCAAGGAAGCAAAGAATAGTCACCTGATCACGGAGAAATTGAATTCCCAATTTAACGTTCCTAAGCTTAGAAAGACGTACTGCAAAGGTAAGCAGTGTCGCAAGCACACCCAACACAAGGTGACGCAATACAAGGCCGGTAAGGCTTCGTTGTTTGCCCAGGGTAAGAGAAGATACGACCGTAAGCAATCCGGTTTCGGTGGTCAGACCAAGCCCGTTTTCCACAAGAAGGCCAAGACCACCAAGAAGGTTGTGTTGAGATTGGAGTGTGTTGCCTGCAAGACCAAGGCCCAATTGTCCTTGAAGAGATGTAAGCACTTCGAGTTGGGTGGAGACAAGAAGCAAAAGGGTCAAGCC…	#VALUE!	241	#VALUE!	#VALUE!	#VALUE!	#VALUE!	#VALUE!
yHMPu5000041806_metschnikowia_agaves_170307_g001380.m1	4236	ATGATGATCAATATCGTTGGTCATGCTTCGTCACGTCCTGCAAATATATACTCAGTCTTGATCCGCATTCCACCTACACTTCAAAACGAGATGTCCAAACAAGAGATAATTGCCTGGTTCCAGTTTAACGTTCCAAAGCTCAGAAAGACTTACTGTAAGGGCAAGCAGTGCCGTAAGCACACCCAACACAAGGTCACCCAATACAAAGCTGGTAAGGCATCGTTGTTTGCTCAGGGTAAGAGAAGATACGACCGTAAACAATCCGGTTACGGTGGTCAAACAAAGCCAGTTTTCCACAAGAAGGCCAAGACCACCAAGAAGGTCGTTTTGAGATTGGAATGTGTCAGTTGCAAGACCAAGGCTCAGTTGTCTTTGAAGAGATGTAAGCACTTCGAGTTG…	ATGATGATCAATATCGTTGGTCATGCTTCGTCACGTCCTGCAAATATATACTCAGTCTTGATCCGCATTCCACCTACACTTCAAAACGAGATGTCCAAACAAGAGATAATTGCCTGGTTCCAGTTTAACGTTCCAAAGCTCAGAAAGACTTACTGTAAGGGCAAGCAGTGCCGTAAGCACACCCAACACAAGGTCACCCAATACAAAGCTGGTAAGGCATCGTTGTTTGCTCAGGGTAAGAGAAGATACGACCGTAAACAATCCGGTTACGGTGGTCAAACAAAGCCAGTTTTCCACAAGAAGGCCAAGACCACCAAGAAGGTCGTTTTGAGATTGGAATGTGTCAGTTGCAAGACCAAGGCTCAGTTGTCTTTGAAGAGATGTAAGCACTTCGAGTTG…	271		271	GGTGGTCAAACAAAG	VALID	CCA	Proline
metschnikowia_mauinuiana_g005581.m1	4236	ATGACCAACGACTACCCAAGTCTGGAGTCACTTTCCAAGCTCTTGCAAATCATCCTCGTTAACGTTCCAAAGCTTAGAAAGACGTACTGCAAAGGTAAGCAGTGTCGCAAGCACACCCAACACAAGGTGACGCAATACAAGGCTGGTAAGGCCTCTTTGTTTGCCCAGGGTAAGAGAAGATACGACCGTAAGCAATCCGGTTTCGGAGGTCAAACCAAGCCCGTTTTCCACAAGAAGGCCAAGACCACCAAGAAGGTTGTGTTGAGATTGGAGTGTGTTGCATGCAAGACCAAGGCTCAATTGTCCTTGAAGAGATGTAAGCACTTCGAGTTGGGTGGAGACAAGAAGCAAAAGGGTCAAGCCTTGCAATTCTAA	ATGACCAACGACTACCCAAGTCTGGAGTCACTTTCCAAGCTCTTGCAAATCATCCTCGTTAACGTTCCAAAGCTTAGAAAGACGTACTGCAAAGGTAAGCAGTGTCGCAAGCACACCCAACACAAGGTGACGCAATACAAGGCTGGTAAGGCCTCTTTGTTTGCCCAGGGTAAGAGAAGATACGACCGTAAGCAATCCGGTTTCGGAGGTCAAACCAAGCCCGTTTTCCACAAGAAGGCCAAGACCACCAAGAAGGTTGTGTTGAGATTGGAGTGTGTTGCATGCAAGACCAAGGCTCAATTGTCCTTGAAGAGATGTAAGCACTTCGAGTTGGGTGGAGACAAGAAGCAAAAGGGTCAAGCCTTGCAATTCTAA	205		205	GGAGGTCAAACCAAG	VALID	CCC	Proline
metschnikowia_arizonensis_g002181.m1	4236	ATGGTTAACGTTCCAAAGCTTAGAAAGACTTACTGCAAAGGTAAGCAGTGTCGTAAGCACACTCAACACAAGGTTACCCAATACAAGGCCGGTAAAGCTTCGTTGTTTGCTCAGGGTAAGAGAAGATATGACCGTAAGCAATCTGGTTTCGGTGGTCAAACAAAGCCTGTTTTCCACAAGAAGGCTAAGACAACAAAGAAGGTTGTGTTGAGATTAGAGTGTGTTGCCTGCAAGACCAAGGCTCAATTGTCCTTGAAGAGATGTAAGCACTTTGAGTTGGGTGGTGACAAGAAGCAAAAGGGACAAGCCTTGCAATTCTAA	ATGGTTAACGTTCCAAAGCTTAGAAAGACTTACTGCAAAGGTAAGCAGTGTCGTAAGCACACTCAACACAAGGTTACCCAATACAAGGCCGGTAAAGCTTCGTTGTTTGCTCAGGGTAAGAGAAGATATGACCGTAAGCAATCTGGTTTCGGTGGTCAAACAAAGCCTGTTTTCCACAAGAAGGCTAAGACAACAAAGAAGGTTGTGTTGAGATTAGAGTGTGTTGCCTGCAAGACCAAGGCTCAATTGTCCTTGAAGAGATGTAAGCACTTTGAGTTGGGTGGTGACAAGAAGCAAAAGGGACAAGCCTTGCAATTCTAA	151		151	GGTGGTCAAACAAAG	VALID	CCT	Proline
metschnikowia_hawaiiensis_g004939.m1	4236	ATGGTTAACGTTCCAAAGCTTAGAAAGACGTACTGCAAAGGTAAGCAGTGTCGCAAGCACACCCAACACAAGGTGACGCAATACAAGGCCGGTAAGGCTTCGTTGTTTGCCCAGGGTAAGAGAAGATACGACCGTAAGCAATCCGGTTTCGGAGGTCAGACCAAGCCCGTTTTCCACAAGAAGGCCAAGACCACCAAGAAGGTTGTGTTGAGATTGGAGTGTGTTGCATGCAAGACCAAGGCCCAATTGTCCTTGAAGAGATGTAAGCACTTCGAGTTGGGTGGAGACAAGAAGCAAAAGGGTCAAGCCTTGCAATTCTAA	ATGGTTAACGTTCCAAAGCTTAGAAAGACGTACTGCAAAGGTAAGCAGTGTCGCAAGCACACCCAACACAAGGTGACGCAATACAAGGCCGGTAAGGCTTCGTTGTTTGCCCAGGGTAAGAGAAGATACGACCGTAAGCAATCCGGTTTCGGAGGTCAGACCAAGCCCGTTTTCCACAAGAAGGCCAAGACCACCAAGAAGGTTGTGTTGAGATTGGAGTGTGTTGCATGCAAGACCAAGGCCCAATTGTCCTTGAAGAGATGTAAGCACTTCGAGTTGGGTGGAGACAAGAAGCAAAAGGGTCAAGCCTTGCAATTCTAA	#VALUE!	151	#VALUE!	#VALUE!	#VALUE!	#VALUE!	#VALUE!
metschnikowia_kamakouana_g000566.m1	4236	ATGGTTAACGTTCCAAAGCTTAGAAAGACGTACTGCAAAGGTAAGCAGTGTCGCAAGCACACCCAACACAAGGTGACGCAATACAAGGCCGGTAAGGCATCTTTGTTTGCCCAGGGTAAGAGAAGATACGACCGTAAGCAATCCGGTTTCGGTGGTCAGACCAAGCCCGTTTTCCACAAGAAGGCCAAGACCACCAAGAAGGTTGTGTTGAGATTGGAGTGTGTTGCCTGCAAGACCAAGGCTCAATTGTCCTTGAAGAGATGTAAGCACTTCGAGTTGGGTGGAGACAAGAAGCAAAAGGGTCAAGCCTTGCAATTCTAA	ATGGTTAACGTTCCAAAGCTTAGAAAGACGTACTGCAAAGGTAAGCAGTGTCGCAAGCACACCCAACACAAGGTGACGCAATACAAGGCCGGTAAGGCATCTTTGTTTGCCCAGGGTAAGAGAAGATACGACCGTAAGCAATCCGGTTTCGGTGGTCAGACCAAGCCCGTTTTCCACAAGAAGGCCAAGACCACCAAGAAGGTTGTGTTGAGATTGGAGTGTGTTGCCTGCAAGACCAAGGCTCAATTGTCCTTGAAGAGATGTAAGCACTTCGAGTTGGGTGGAGACAAGAAGCAAAAGGGTCAAGCCTTGCAATTCTAA	#VALUE!	151	#VALUE!	#VALUE!	#VALUE!	#VALUE!	#VALUE!
yHMPu5000040795_metschnikowia_matae_201018_g006376.m1	4236	ATGGTTAACGTTCCTAAGCTTAGAAAGACGTACTGCAAAGGTAAGCAGTGTCGCAAGCACACCCAACACAAGGTGACTCAATACAAGGCCGGTAAGGCTTCTTTGTTTGCCCAGGGTAAGAGAAGATATGACCGTAAGCAATCCGGTTTCGGTGGTCAGACCAAGCCCGTTTTCCACAAGAAGGCCAAGACTACCAAGAAGGTTGTGTTGAGATTGGAGTGTGTTGCTTGCAAGACCAAGGCTCAATTGTCCTTGAAGAGATGTAAGCACTTCGAGTTGGGTGGAGACAAGAAGCAAAAGGGTCAAGCCTTGCAATTCTAA	ATGGTTAACGTTCCTAAGCTTAGAAAGACGTACTGCAAAGGTAAGCAGTGTCGCAAGCACACCCAACACAAGGTGACTCAATACAAGGCCGGTAAGGCTTCTTTGTTTGCCCAGGGTAAGAGAAGATATGACCGTAAGCAATCCGGTTTCGGTGGTCAGACCAAGCCCGTTTTCCACAAGAAGGCCAAGACTACCAAGAAGGTTGTGTTGAGATTGGAGTGTGTTGCTTGCAAGACCAAGGCTCAATTGTCCTTGAAGAGATGTAAGCACTTCGAGTTGGGTGGAGACAAGAAGCAAAAGGGTCAAGCCTTGCAATTCTAA	#VALUE!	151	#VALUE!	#VALUE!	#VALUE!	#VALUE!	#VALUE!
yHMPu5000040940_metschnikowia_matae_201018_g004083.m1	4236	ATGGTTAACGTTCCTAAGCTTAGAAAGACGTACTGCAAAGGTAAGCAGTGTCGCAAGCACACCCAACACAAGGTGACTCAATACAAGGCCGGTAAGGCTTCTTTGTTTGCCCAGGGTAAGAGAAGATATGACCGTAAGCAATCCGGTTTCGGTGGTCAGACCAAGCCCGTTTTCCACAAGAAGGCCAAGACTACCAAGAAGGTTGTGTTGAGATTGGAGTGTGTTGCTTGCAAGACCAAGGCTCAATTGTCCTTGAAGAGATGTAAGCACTTCGAGTTGGGTGGAGACAAGAAGCAAAAGGGTCAAGCCTTGCAATTCTAA	ATGGTTAACGTTCCTAAGCTTAGAAAGACGTACTGCAAAGGTAAGCAGTGTCGCAAGCACACCCAACACAAGGTGACTCAATACAAGGCCGGTAAGGCTTCTTTGTTTGCCCAGGGTAAGAGAAGATATGACCGTAAGCAATCCGGTTTCGGTGGTCAGACCAAGCCCGTTTTCCACAAGAAGGCCAAGACTACCAAGAAGGTTGTGTTGAGATTGGAGTGTGTTGCTTGCAAGACCAAGGCTCAATTGTCCTTGAAGAGATGTAAGCACTTCGAGTTGGGTGGAGACAAGAAGCAAAAGGGTCAAGCCTTGCAATTCTAA	#VALUE!	151	#VALUE!	#VALUE!	#VALUE!	#VALUE!	#VALUE!
yHMPu5000040941_metschnikowia_lochheadii_201018_g001133.m1	4236	ATGGTTAACGTTCCTAAGCTTAGAAAGACGTACTGCAAAGGTAAGCAGTGTCGCAAGCACACCCAACACAAGGTGACTCAATACAAGGCCGGTAAGGCTTCGTTGTTTGCCCAGGGTAAGAGAAGATACGACCGTAAGCAATCCGGTTTCGGTGGTCAGACCAAGCCCGTTTTCCACAAGAAGGCCAAGACTACCAAGAAGGTTGTGTTGAGATTGGAGTGTGTTGCCTGCAAGACCAAGGCTCAATTGTCCTTGAAGAGATGTAAGCACTTCGAGTTGGGTGGAGACAAGAAGCAAAAGGGTCAAGCCTTGCAATTCTAA	ATGGTTAACGTTCCTAAGCTTAGAAAGACGTACTGCAAAGGTAAGCAGTGTCGCAAGCACACCCAACACAAGGTGACTCAATACAAGGCCGGTAAGGCTTCGTTGTTTGCCCAGGGTAAGAGAAGATACGACCGTAAGCAATCCGGTTTCGGTGGTCAGACCAAGCCCGTTTTCCACAAGAAGGCCAAGACTACCAAGAAGGTTGTGTTGAGATTGGAGTGTGTTGCCTGCAAGACCAAGGCTCAATTGTCCTTGAAGAGATGTAAGCACTTCGAGTTGGGTGGAGACAAGAAGCAAAAGGGTCAAGCCTTGCAATTCTAA	#VALUE!	151	#VALUE!	#VALUE!	#VALUE!	#VALUE!	#VALUE!
yHMPu5000040943_metschnikowia_continentalis_201018_g006266.m1	4236	ATGGTTAACGTTCCTAAGCTTAGAAAGACGTACTGCAAAGGTAAGCAGTGTCGCAAGCACACCCAACACAAGGTGACGCAATACAAGGCCGGTAAGGCCTCTTTGTTTGCCCAGGGTAAGAGAAGATACGACCGTAAGCAATCCGGTTTCGGTGGTCAGACCAAGCCCGTTTTCCACAAGAAGGCCAAGACTACCAAGAAGGTTGTGTTGAGATTGGAGTGTGTTGCCTGCAAGACCAAGGCTCAATTGTCCTTGAAGAGATGTAAGCACTTCGAGTTGGGTGGAGACAAGAAGCAAAAGGGTCAAGCCTTGCAATTCTAA	ATGGTTAACGTTCCTAAGCTTAGAAAGACGTACTGCAAAGGTAAGCAGTGTCGCAAGCACACCCAACACAAGGTGACGCAATACAAGGCCGGTAAGGCCTCTTTGTTTGCCCAGGGTAAGAGAAGATACGACCGTAAGCAATCCGGTTTCGGTGGTCAGACCAAGCCCGTTTTCCACAAGAAGGCCAAGACTACCAAGAAGGTTGTGTTGAGATTGGAGTGTGTTGCCTGCAAGACCAAGGCTCAATTGTCCTTGAAGAGATGTAAGCACTTCGAGTTGGGTGGAGACAAGAAGCAAAAGGGTCAAGCCTTGCAATTCTAA	#VALUE!	151	#VALUE!	#VALUE!	#VALUE!	#VALUE!	#VALUE!
yHMPu5000040948_metschnikowia_hamakuensis_201018_g005507.m1	4236	ATGGTTAACGTTCCAAAGCTTAGAAAGACGTACTGCAAAGGTAAGCAGTGTCGCAAGCACACCCAACACAAGGTGACGCAATACAAGGCCGGTAAGGCTTCTTTGTTTGCCCAGGGTAAGAGAAGATACGACCGTAAGCAATCCGGTTTCGGAGGTCAAACCAAGCCCGTTTTCCACAAGAAGGCCAAGACCACCAAGAAGGTTGTGTTGAGATTGGAGTGTGTTGCTTGCAAGACCAAGGCTCAATTGTCCTTGAAGAGATGTAAGCACTTCGAGTTGGGTGGAGACAAGAAGCAAAAGGGTCAAGCCTTGCAATTCTAA	ATGGTTAACGTTCCAAAGCTTAGAAAGACGTACTGCAAAGGTAAGCAGTGTCGCAAGCACACCCAACACAAGGTGACGCAATACAAGGCCGGTAAGGCTTCTTTGTTTGCCCAGGGTAAGAGAAGATACGACCGTAAGCAATCCGGTTTCGGAGGTCAAACCAAGCCCGTTTTCCACAAGAAGGCCAAGACCACCAAGAAGGTTGTGTTGAGATTGGAGTGTGTTGCTTGCAAGACCAAGGCTCAATTGTCCTTGAAGAGATGTAAGCACTTCGAGTTGGGTGGAGACAAGAAGCAAAAGGGTCAAGCCTTGCAATTCTAA	151		151	GGAGGTCAAACCAAG	VALID	CCC	Proline
yHMPu5000040949_metschnikowia_hawaiiensis_201018_g004911.m1	4236	ATGGTTAACGTTCCAAAGCTTAGAAAGACGTACTGCAAAGGTAAGCAGTGTCGCAAGCACACCCAACACAAGGTGACGCAATACAAGGCCGGTAAGGCTTCGTTGTTTGCCCAGGGTAAGAGAAGATACGACCGTAAGCAATCCGGTTTCGGAGGTCAGACCAAGCCCGTTTTCCACAAGAAGGCCAAGACCACCAAGAAGGTTGTGTTGAGATTGGAGTGTGTTGCATGCAAGACCAAGGCCCAATTGTCCTTGAAGAGATGTAAGCACTTCGAGTTGGGTGGAGACAAGAAGCAAAAGGGTCAAGCCTTGCAATTCTAA	ATGGTTAACGTTCCAAAGCTTAGAAAGACGTACTGCAAAGGTAAGCAGTGTCGCAAGCACACCCAACACAAGGTGACGCAATACAAGGCCGGTAAGGCTTCGTTGTTTGCCCAGGGTAAGAGAAGATACGACCGTAAGCAATCCGGTTTCGGAGGTCAGACCAAGCCCGTTTTCCACAAGAAGGCCAAGACCACCAAGAAGGTTGTGTTGAGATTGGAGTGTGTTGCATGCAAGACCAAGGCCCAATTGTCCTTGAAGAGATGTAAGCACTTCGAGTTGGGTGGAGACAAGAAGCAAAAGGGTCAAGCCTTGCAATTCTAA	#VALUE!	151	#VALUE!	#VALUE!	#VALUE!	#VALUE!	#VALUE!
yHMPu5000040954_metschnikowia_cerradonensis_201018_g005319.m1	4236	ATGGTTAACGTTCCTAAGCTTAGAAAGACGTACTGCAAAGGTAAGCAGTGTCGCAAGCACACCCAACACAAGGTGACGCAATACAAGGCTGGTAAGGCTTCTTTGTTTGCCCAGGGTAAGAGAAGATACGACCGTAAGCAATCCGGTTTCGGTGGTCAGACCAAGCCCGTTTTCCACAAGAAGGCCAAGACTACCAAGAAGGTTGTGTTGAGATTGGAGTGTGTTGCCTGCAAGACCAAGGCTCAATTGTCTTTGAAGAGATGTAAGCACTTCGAGTTGGGTGGAGACAAGAAGCAAAAGGGTCAAGCCTTGCAATTCTAA	ATGGTTAACGTTCCTAAGCTTAGAAAGACGTACTGCAAAGGTAAGCAGTGTCGCAAGCACACCCAACACAAGGTGACGCAATACAAGGCTGGTAAGGCTTCTTTGTTTGCCCAGGGTAAGAGAAGATACGACCGTAAGCAATCCGGTTTCGGTGGTCAGACCAAGCCCGTTTTCCACAAGAAGGCCAAGACTACCAAGAAGGTTGTGTTGAGATTGGAGTGTGTTGCCTGCAAGACCAAGGCTCAATTGTCTTTGAAGAGATGTAAGCACTTCGAGTTGGGTGGAGACAAGAAGCAAAAGGGTCAAGCCTTGCAATTCTAA	#VALUE!	151	#VALUE!	#VALUE!	#VALUE!	#VALUE!	#VALUE!
yHMPu5000040956_metschnikowia_borealis_201018_g004879.m1	4236	ATGGTTAACGTTCCTAAGCTTAGAAAGACGTACTGCAAAGGTAAGCAGTGTCGCAAGCACACCCAACACAAGGTGACGCAATACAAGGCCGGTAAGGCTTCGTTGTTTGCCCAGGGTAAGAGAAGATACGACCGTAAGCAATCCGGTTTCGGTGGTCAGACCAAGCCCGTTTTCCACAAGAAGGCCAAGACCACCAAGAAGGTTGTGTTGAGATTGGAGTGTGTTGCCTGCAAGACCAAGGCCCAATTGTCCTTGAAGAGATGTAAGCACTTCGAGTTGGGTGGAGACAAGAAGCAAAAGGGTCAAGCCTTGCAATTCTAA	ATGGTTAACGTTCCTAAGCTTAGAAAGACGTACTGCAAAGGTAAGCAGTGTCGCAAGCACACCCAACACAAGGTGACGCAATACAAGGCCGGTAAGGCTTCGTTGTTTGCCCAGGGTAAGAGAAGATACGACCGTAAGCAATCCGGTTTCGGTGGTCAGACCAAGCCCGTTTTCCACAAGAAGGCCAAGACCACCAAGAAGGTTGTGTTGAGATTGGAGTGTGTTGCCTGCAAGACCAAGGCCCAATTGTCCTTGAAGAGATGTAAGCACTTCGAGTTGGGTGGAGACAAGAAGCAAAAGGGTCAAGCCTTGCAATTCTAA	#VALUE!	151	#VALUE!	#VALUE!	#VALUE!	#VALUE!	#VALUE!
yHMPu5000041743_candida_hawaiiana_170307_g004248.m1	4236	ATGGTTAACGTTCCAAAGCTTAGAAAGACTTACTGCAAAGGTAAGCAATGTCGTAAGCACACTCAACACAAGGTCACCCAATACAAGGCTGGTAAGGCTTCCTTGTTCGCTCAAGGTAAGAGAAGATACGACCGTAAGCAATCCGGTTTCGGTGGTCAAACTAAGCCAGTTTTCCACAAGAAGGCCAAGACCACCAAGAAGGTTGTCTTGAGATTGGAGTGTGTTGCATGCAAGACCAAGGCTCAATTGTCCTTGAAGAGATGTAAGCACTTCGAGTTGGGTGGTGACAAGAAGCAAAAGGGTCAAGCTTTGCAATTTTAA	ATGGTTAACGTTCCAAAGCTTAGAAAGACTTACTGCAAAGGTAAGCAATGTCGTAAGCACACTCAACACAAGGTCACCCAATACAAGGCTGGTAAGGCTTCCTTGTTCGCTCAAGGTAAGAGAAGATACGACCGTAAGCAATCCGGTTTCGGTGGTCAAACTAAGCCAGTTTTCCACAAGAAGGCCAAGACCACCAAGAAGGTTGTCTTGAGATTGGAGTGTGTTGCATGCAAGACCAAGGCTCAATTGTCCTTGAAGAGATGTAAGCACTTCGAGTTGGGTGGTGACAAGAAGCAAAAGGGTCAAGCTTTGCAATTTTAA	151		151	GGTGGTCAAACTAAG	VALID	CCA	Proline
yHMPu5000041810_metschnikowia_drosophilae_201018_g000919.m1	4236	ATGGTTAACGTTCCAAAGCTCAGAAAGACTTACTGTAAGGGTAAGCAATGCCGCAAGCACACCCAACACAAGGTTACCCAATACAAGGCTGGTAAGGCTTCCTTGTTCGCTCAAGGTAAGAGAAGATACGACCGTAAGCAATCCGGTTTCGGTGGTCAAACCAAGCCAGTTTTCCACAAGAAGGCTAAGACTACCAAGAAGGTTGTCTTGAGATTGGAATGTGTTGCCTGCAAGACCAAGGCTCAACTCTCTTTGAAGAGATGTAAGCACTTCGAGTTGGGTGGTGACAAGAAGCAAAAGGGTCAAGCTTTGCAATTTTAA	ATGGTTAACGTTCCAAAGCTCAGAAAGACTTACTGTAAGGGTAAGCAATGCCGCAAGCACACCCAACACAAGGTTACCCAATACAAGGCTGGTAAGGCTTCCTTGTTCGCTCAAGGTAAGAGAAGATACGACCGTAAGCAATCCGGTTTCGGTGGTCAAACCAAGCCAGTTTTCCACAAGAAGGCTAAGACTACCAAGAAGGTTGTCTTGAGATTGGAATGTGTTGCCTGCAAGACCAAGGCTCAACTCTCTTTGAAGAGATGTAAGCACTTCGAGTTGGGTGGTGACAAGAAGCAAAAGGGTCAAGCTTTGCAATTTTAA	151		151	GGTGGTCAAACCAAG	VALID	CCA	Proline
yHMPu5000041815_metschnikowia_orientalis_190924_g002825.m1	4236	ATGGTTAACGTTCCAAAGCTTAGAAAGACTTACTGTAAGGGTAAGCAGTGTCGTAAGCACACTCAACACAAGGTCACCCAATACAAGGCTGGTAAGGCTTCCTTGTTCGCTCAAGGTAAGAGAAGATACGACCGTAAGCAATCCGGTTTCGGTGGTCAAACCAAGCCAGTTTTCCACAAGAAGGCCAAGACTACCAAGAAGGTTGTTTTGAGATTGGAGTGTGTTGCATGCAAGACCAAGGCTCAATTGTCCTTGAAGAGATGTAAGCACTTCGAGTTGGGTGGTGACAAGAAGCAAAAGGGTCAAGCTTTGCAATTTTAA	ATGGTTAACGTTCCAAAGCTTAGAAAGACTTACTGTAAGGGTAAGCAGTGTCGTAAGCACACTCAACACAAGGTCACCCAATACAAGGCTGGTAAGGCTTCCTTGTTCGCTCAAGGTAAGAGAAGATACGACCGTAAGCAATCCGGTTTCGGTGGTCAAACCAAGCCAGTTTTCCACAAGAAGGCCAAGACTACCAAGAAGGTTGTTTTGAGATTGGAGTGTGTTGCATGCAAGACCAAGGCTCAATTGTCCTTGAAGAGATGTAAGCACTTCGAGTTGGGTGGTGACAAGAAGCAAAAGGGTCAAGCTTTGCAATTTTAA	151		151	GGTGGTCAAACCAAG	VALID	CCA	Proline
yHMPu5000041839_candida_torresii_210210_g004608.m1	4236	ATGGTTAACGTTCCAAAGCTCAGAAAGACCTACTGTAAGGGTAAGCAATGCCGCAAGCACACCCAACACAAGGTTACCCAATACAAGGCTGGTAAGGCTTCCTTGTTCGCTCAAGGTAAGAGAAGATATGACCGTAAGCAATCCGGTTTCGGTGGTCAAACCAAGCCAGTTTTCCACAAGAAGGCTAAGACTACCAAGAAGGTTGTCTTGAGATTGGAATGTGTTGCTTGTAAGACCAAGGCTCAACTCTCTTTGAAGAGATGCAAGCACTTCGAGTTGGGTGGTGACAAGAAGCAAAAGGGTCAAGCTTTGCAATTTTAA	ATGGTTAACGTTCCAAAGCTCAGAAAGACCTACTGTAAGGGTAAGCAATGCCGCAAGCACACCCAACACAAGGTTACCCAATACAAGGCTGGTAAGGCTTCCTTGTTCGCTCAAGGTAAGAGAAGATATGACCGTAAGCAATCCGGTTTCGGTGGTCAAACCAAGCCAGTTTTCCACAAGAAGGCTAAGACTACCAAGAAGGTTGTCTTGAGATTGGAATGTGTTGCTTGTAAGACCAAGGCTCAACTCTCTTTGAAGAGATGCAAGCACTTCGAGTTGGGTGGTGACAAGAAGCAAAAGGGTCAAGCTTTGCAATTTTAA	151		151	GGTGGTCAAACCAAG	VALID	CCA	Proline
metschnikowia_similis_g005699.m1	4236	ATGGTTAACGTTCCAAAGCTTAGAAAAACCTACTGCAAAGGTAAGCAGTGTCGCAAGCACACCCAGCACAAGGTGACTCAATACAAGGCCGGCAAAGCCTCGTTGTTTGCTCAGGGTAAGAGAAGATACGACCGTAAGCAATCCGGTTTCGGTGGTCAGACCAAGCCTGTTTTCCACAAGAAGGCCAAGACCACCAAGAAGGTTGTGTTGAGATTGGAGTGTGTGTCCTGCAAGACCAAGGCGCAGTTGTCCTTGAAGAGATGTAAGCACTTTGAGTTGGGTGGTGACAAGAAGCAAAAGGGTCAAGCCTTGCAATTCTAA	ATGGTTAACGTTCCAAAGCTTAGAAAAACCTACTGCAAAGGTAAGCAGTGTCGCAAGCACACCCAGCACAAGGTGACTCAATACAAGGCCGGCAAAGCCTCGTTGTTTGCTCAGGGTAAGAGAAGATACGACCGTAAGCAATCCGGTTTCGGTGGTCAGACCAAGCCTGTTTTCCACAAGAAGGCCAAGACCACCAAGAAGGTTGTGTTGAGATTGGAGTGTGTGTCCTGCAAGACCAAGGCGCAGTTGTCCTTGAAGAGATGTAAGCACTTTGAGTTGGGTGGTGACAAGAAGCAAAAGGGTCAAGCCTTGCAATTCTAA	#VALUE!	151	#VALUE!	#VALUE!	#VALUE!	#VALUE!	#VALUE!
yHMPu5000040955_metschnikowia_bowlesiae_201018_g005365.m1	4236	ATGGTTAACGTTCCAAAGCTTAGAAAAACCTACTGCAAAGGTAAGCAGTGTCGCAAGCACACCCAGCACAAGGTGACTCAATACAAGGCCGGCAAAGCCTCGTTGTTTGCTCAGGGTAAGAGAAGATACGACCGTAAGCAGTCCGGTTTCGGTGGTCAGACCAAGCCTGTTTTCCACAAGAAGGCCAAGACCACCAAGAAGGTTGTGTTGAGATTGGAGTGTGTCTCCTGCAAGACCAAGGCCCAGTTGTCCTTGAAGAGATGTAAGCACTTTGAGTTGGGTGGTGACAAGAAGCAAAAGGGTCAAGCCTTGCAATTCTAA	ATGGTTAACGTTCCAAAGCTTAGAAAAACCTACTGCAAAGGTAAGCAGTGTCGCAAGCACACCCAGCACAAGGTGACTCAATACAAGGCCGGCAAAGCCTCGTTGTTTGCTCAGGGTAAGAGAAGATACGACCGTAAGCAGTCCGGTTTCGGTGGTCAGACCAAGCCTGTTTTCCACAAGAAGGCCAAGACCACCAAGAAGGTTGTGTTGAGATTGGAGTGTGTCTCCTGCAAGACCAAGGCCCAGTTGTCCTTGAAGAGATGTAAGCACTTTGAGTTGGGTGGTGACAAGAAGCAAAAGGGTCAAGCCTTGCAATTCTAA	#VALUE!	151	#VALUE!	#VALUE!	#VALUE!	#VALUE!	#VALUE!
yHDO585_candida_citri_180604_g002874.m1	4236	ATGGTTAACGTTCCAAAGCTCAGAAAGACCTACTGTAAGGGTAAGCAGTGCAGAAAGCACACTCAACACAAGGTTACCCAATACAAGGCTGGTAAGGCTTCCTTGTTCGCCCAAGGTAAGAGAAGATACGACCGTAAGCAATCCGGTTTCGGTGGTCAAACCAAGCCAGTTTTCCACAAGAAGGCTAAGACCACCAAGAAGGTTGTGTTGAGATTGGAGTGTGTTGCTTGCAAGACCAAGGCTCAATTGGCTTTGAAGAGATGTAAGCACTTCGAGTTGGGTGGTGACAAGAAGCAAAAGGGTCAAGCCTTGCAATTTTAA	ATGGTTAACGTTCCAAAGCTCAGAAAGACCTACTGTAAGGGTAAGCAGTGCAGAAAGCACACTCAACACAAGGTTACCCAATACAAGGCTGGTAAGGCTTCCTTGTTCGCCCAAGGTAAGAGAAGATACGACCGTAAGCAATCCGGTTTCGGTGGTCAAACCAAGCCAGTTTTCCACAAGAAGGCTAAGACCACCAAGAAGGTTGTGTTGAGATTGGAGTGTGTTGCTTGCAAGACCAAGGCTCAATTGGCTTTGAAGAGATGTAAGCACTTCGAGTTGGGTGGTGACAAGAAGCAAAAGGGTCAAGCCTTGCAATTTTAA	151		151	GGTGGTCAAACCAAG	VALID	CCA	Proline
yHMPu5000034988_candida_fructus_160519_g004382.m1	4236	ATGGTTAACGTTCCAAAGCTCAGAAAGACCTACTGCAAGGGTAAGCAATGCAGAAAGCACACCCAACACAAGGTTACCCAATACAAGGCTGGTAAGGCTTCTTTGTTCGCTCAAGGTAAGAGAAGATACGACCGTAAGCAATCCGGTTTCGGTGGTCAAACCAAGCCAGTTTTCCACAAGAAGGCTAAGACTACCAAGAAGGTTGTGTTGAGATTGGAATGTGTCGCCTGTAAGACTAAGGCTCAGTTGGCTTTGAAGAGATGTAAGCACTTCGAGTTGGGTGGTGACAAGAAGCAAAAGGGTCAAGCTTTGCAATTTTAA	ATGGTTAACGTTCCAAAGCTCAGAAAGACCTACTGCAAGGGTAAGCAATGCAGAAAGCACACCCAACACAAGGTTACCCAATACAAGGCTGGTAAGGCTTCTTTGTTCGCTCAAGGTAAGAGAAGATACGACCGTAAGCAATCCGGTTTCGGTGGTCAAACCAAGCCAGTTTTCCACAAGAAGGCTAAGACTACCAAGAAGGTTGTGTTGAGATTGGAATGTGTCGCCTGTAAGACTAAGGCTCAGTTGGCTTTGAAGAGATGTAAGCACTTCGAGTTGGGTGGTGACAAGAAGCAAAAGGGTCAAGCTTTGCAATTTTAA	151		151	GGTGGTCAAACCAAG	VALID	CCA	Proline
yHMPu5000037916_candida_carvajalis_180604_g004624.m1	4236	ATGGTTAACGTTCCAAAGCTCAGAAAGACCTACTGCAAGGGTAAGCAATGCAGAAAGCACACCCAACACAAGGTTACCCAATACAAGGCTGGTAAGGCTTCTTTGTTCGCCCAAGGTAAGAGAAGATACGACCGTAAGCAATCCGGTTTCGGTGGTCAAACCAAGCCAGTTTTCCACAAGAAGGCTAAGACTACCAAGAAGGTTGTCTTGAGATTGGAATGTGTCGCCTGCAAGACCAAGGCTCAGTTGGCTTTGAAGAGATGTAAGCACTTCGAGTTGGGTGGTGACAAGAAGCAAAAGGGTCAAGCTTTGCAATTTTAA	ATGGTTAACGTTCCAAAGCTCAGAAAGACCTACTGCAAGGGTAAGCAATGCAGAAAGCACACCCAACACAAGGTTACCCAATACAAGGCTGGTAAGGCTTCTTTGTTCGCCCAAGGTAAGAGAAGATACGACCGTAAGCAATCCGGTTTCGGTGGTCAAACCAAGCCAGTTTTCCACAAGAAGGCTAAGACTACCAAGAAGGTTGTCTTGAGATTGGAATGTGTCGCCTGCAAGACCAAGGCTCAGTTGGCTTTGAAGAGATGTAAGCACTTCGAGTTGGGTGGTGACAAGAAGCAAAAGGGTCAAGCTTTGCAATTTTAA	151		151	GGTGGTCAAACCAAG	VALID	CCA	Proline
yHMPu5000038103_candida_melibiosica_170912_g002254.m1	4236	ATGGTCAACGTTCCAAAGCTCAGAAAGACCTACTGTAAGGGTAAGCAGTGCCGCAAGCACACCCAGCACAAGGTGACCCAGTACAAGGCCGGTAAGGCTTCCTTGTTCGCCCAGGGTAAGAGAAGATACGACCGTAAGCAGTCCGGTTTCGGTGGTCAGACCAAGCCCGTCTTCCACAAGAAGGCTAAGACCACCAAGAAGGTTGTGTTGAGATTGGAGTGTGTCGCCTGCAAGACCAAGGCCCAGTTGGCTTTGAAGAGATGCAAGCACTTCGAGTTGGGTGGTGACAAGAAGCAGAAGGGCCAGGCTTTGCAGTTCTAA	ATGGTCAACGTTCCAAAGCTCAGAAAGACCTACTGTAAGGGTAAGCAGTGCCGCAAGCACACCCAGCACAAGGTGACCCAGTACAAGGCCGGTAAGGCTTCCTTGTTCGCCCAGGGTAAGAGAAGATACGACCGTAAGCAGTCCGGTTTCGGTGGTCAGACCAAGCCCGTCTTCCACAAGAAGGCTAAGACCACCAAGAAGGTTGTGTTGAGATTGGAGTGTGTCGCCTGCAAGACCAAGGCCCAGTTGGCTTTGAAGAGATGCAAGCACTTCGAGTTGGGTGGTGACAAGAAGCAGAAGGGCCAGGCTTTGCAGTTCTAA	#VALUE!	151	#VALUE!	#VALUE!	#VALUE!	#VALUE!	#VALUE!
yHMPu5000038348_candida_vitiphila_170713_g002282.m1	4236	ATGGTTAACGTTCCAAAGCTCAGAAAGACCTACTGTAAGGGTAAGCAATGCAGAAAGCACACCCAACACAAGGTTACCCAATACAAGGCTGGTAAGGCTTCTTTGTTCGCTCAAGGTAAGAGAAGATACGACCGTAAGCAATCCGGTTTCGGTGGTCAAACCAAGCCAGTTTTCCACAAGAAGGCTAAGACCACCAAGAAGGTTGTGTTGAGATTGGAATGTGTCGCCTGTAAGACTAAGGCTCAGTTGGCTTTGAAGAGATGTAAGCACTTCGAGTTGGGTGGTGACAAGAAGCAAAAGGGTCAAGCTTTGCAATTTTAA	ATGGTTAACGTTCCAAAGCTCAGAAAGACCTACTGTAAGGGTAAGCAATGCAGAAAGCACACCCAACACAAGGTTACCCAATACAAGGCTGGTAAGGCTTCTTTGTTCGCTCAAGGTAAGAGAAGATACGACCGTAAGCAATCCGGTTTCGGTGGTCAAACCAAGCCAGTTTTCCACAAGAAGGCTAAGACCACCAAGAAGGTTGTGTTGAGATTGGAATGTGTCGCCTGTAAGACTAAGGCTCAGTTGGCTTTGAAGAGATGTAAGCACTTCGAGTTGGGTGGTGACAAGAAGCAAAAGGGTCAAGCTTTGCAATTTTAA	151		151	GGTGGTCAAACCAAG	VALID	CCA	Proline
yHMPu5000038368_candida_pseudoflosculorum_170713_g001275.m1	4236	ATGGTTAACGTTCCAAAGCTCAGAAAGACTTACTGTAAGGGTAAGCAGTGCAGAAAGCACACCCAGCACAAGGTTACCCAATACAAGGCTGGTAAGGCTTCCTTGTTCGCTCAGGGTAAGAGAAGATACGACCGTAAGCAGTCCGGTTTCGGTGGTCAGACCAAGCCAGTTTTCCACAAGAAGGCCAAGACCACCAAGAAGGTTGTTTTGAGATTGGAGTGTGTTGCTTGCAAGACCAAGGCTCAGTTGGCTTTGAAGAGATGTAAGCACTTCGAGTTGGGTGGTGACAAGAAGCAAAAGGGTCAAGCCTTGCAGTTTTAG	ATGGTTAACGTTCCAAAGCTCAGAAAGACTTACTGTAAGGGTAAGCAGTGCAGAAAGCACACCCAGCACAAGGTTACCCAATACAAGGCTGGTAAGGCTTCCTTGTTCGCTCAGGGTAAGAGAAGATACGACCGTAAGCAGTCCGGTTTCGGTGGTCAGACCAAGCCAGTTTTCCACAAGAAGGCCAAGACCACCAAGAAGGTTGTTTTGAGATTGGAGTGTGTTGCTTGCAAGACCAAGGCTCAGTTGGCTTTGAAGAGATGTAAGCACTTCGAGTTGGGTGGTGACAAGAAGCAAAAGGGTCAAGCCTTGCAGTTTTAG	#VALUE!	151	#VALUE!	#VALUE!	#VALUE!	#VALUE!	#VALUE!
yHMPu5000038370_candida_phyllophila_180604_g003995.m1	4236	ATGGTTAACGTTCCAAAGCTCAGAAAGACCTACTGCAAGGGTAAGCAATGCAGAAAGCACACCCAACACAAGGTTACCCAATACAAGGCTGGTAAGGCTTCTTTGTTTGCTCAAGGTAAGAGAAGATACGACCGTAAGCAATCCGGTTTCGGTGGTCAAACCAAGCCAGTTTTCCACAAGAAGGCTAAGACCACCAAGAAGGTTGTGTTGAGATTGGAATGTGTCGCCTGTAAGACTAAGGCTCAGTTGGCTTTGAAGAGATGTAAGCACTTCGAGTTGGGTGGTGACAAGAAGCAAAAGGGTCAAGCTTTGCAATTTTAA	ATGGTTAACGTTCCAAAGCTCAGAAAGACCTACTGCAAGGGTAAGCAATGCAGAAAGCACACCCAACACAAGGTTACCCAATACAAGGCTGGTAAGGCTTCTTTGTTTGCTCAAGGTAAGAGAAGATACGACCGTAAGCAATCCGGTTTCGGTGGTCAAACCAAGCCAGTTTTCCACAAGAAGGCTAAGACCACCAAGAAGGTTGTGTTGAGATTGGAATGTGTCGCCTGTAAGACTAAGGCTCAGTTGGCTTTGAAGAGATGTAAGCACTTCGAGTTGGGTGGTGACAAGAAGCAAAAGGGTCAAGCTTTGCAATTTTAA	151		151	GGTGGTCAAACCAAG	VALID	CCA	Proline
yHMPu5000038405_candida_baotianensis_190924_g004741.m1	4236	ATGGTCAACGTTCCAAAGCTCAGAAAGACCTACTGTAAGGGTAAGCAGTGCCGCAAGCACACCCAGCACAAGGTGACCCAGTACAAGGCCGGTAAGGCTTCCTTGTTCGCCCAGGGTAAGAGAAGATACGACCGTAAGCAGTCCGGTTTCGGTGGTCAGACCAAGCCCGTCTTCCACAAGAAGGCTAAGACCACCAAGAAGGTTGTGTTGAGATTGGAGTGTGTCGCCTGCAAGACCAAGGCCCAGTTGGCTTTGAAGAGATGCAAGCACTTCGAGTTGGGTGGTGACAAGAAGCAGAAGGGCCAGGCTTTGCAGTTCTAA	ATGGTCAACGTTCCAAAGCTCAGAAAGACCTACTGTAAGGGTAAGCAGTGCCGCAAGCACACCCAGCACAAGGTGACCCAGTACAAGGCCGGTAAGGCTTCCTTGTTCGCCCAGGGTAAGAGAAGATACGACCGTAAGCAGTCCGGTTTCGGTGGTCAGACCAAGCCCGTCTTCCACAAGAAGGCTAAGACCACCAAGAAGGTTGTGTTGAGATTGGAGTGTGTCGCCTGCAAGACCAAGGCCCAGTTGGCTTTGAAGAGATGCAAGCACTTCGAGTTGGGTGGTGACAAGAAGCAGAAGGGCCAGGCTTTGCAGTTCTAA	#VALUE!	151	#VALUE!	#VALUE!	#VALUE!	#VALUE!	#VALUE!
yHMPu5000040932_candida_flosculorum_201018_g001196.m1	4236	ATGGTTAACGTTCCAAAGCTCAGAAAGACTTACTGTAAGGGTAAGCAGTGCAGAAAGCACACCCAGCACAAGGTTACCCAATACAAGGCTGGTAAGGCTTCCTTGTTCGCTCAGGGTAAGAGAAGATACGACCGTAAGCAGTCCGGTTTCGGTGGTCAGACCAAGCCAGTTTTCCACAAGAAGGCCAAGACCACCAAGAAGGTTGTTTTGAGATTGGAGTGTGTTGCTTGCAAGACCAAGGCTCAGTTGGCTTTGAAGAGATGTAAGCACTTCGAGTTGGGTGGTGACAAGAAGCAAAAGGGTCAAGCCTTGCAGTTTTAG	ATGGTTAACGTTCCAAAGCTCAGAAAGACTTACTGTAAGGGTAAGCAGTGCAGAAAGCACACCCAGCACAAGGTTACCCAATACAAGGCTGGTAAGGCTTCCTTGTTCGCTCAGGGTAAGAGAAGATACGACCGTAAGCAGTCCGGTTTCGGTGGTCAGACCAAGCCAGTTTTCCACAAGAAGGCCAAGACCACCAAGAAGGTTGTTTTGAGATTGGAGTGTGTTGCTTGCAAGACCAAGGCTCAGTTGGCTTTGAAGAGATGTAAGCACTTCGAGTTGGGTGGTGACAAGAAGCAAAAGGGTCAAGCCTTGCAGTTTTAG	#VALUE!	151	#VALUE!	#VALUE!	#VALUE!	#VALUE!	#VALUE!
yHMPu5000041848_candida_musae_170713_g001467.m1	4236	ATGGTTAACGTTCCAAAGCTCAGAAAGACCTACTGCAAGGGTAAGCAATGCAGAAAGCACACCCAACACAAGGTTACCCAATACAAGGCTGGTAAGGCTTCTTTGTTCGCTCAAGGTAAGAGAAGATACGACCGTAAGCAATCCGGTTTCGGTGGTCAAACCAAGCCAGTTTTCCACAAGAAGGCTAAGACTACCAAGAAGGTTGTGTTGAGATTGGAATGTGTCGCCTGTAAGACTAAGGCTCAGTTGGCTTTGAAGAGATGTAAGCACTTCGAGTTGGGTGGTGACAAGAAGCAAAAGGGTCAAGCTTTGCAATTTTAA	ATGGTTAACGTTCCAAAGCTCAGAAAGACCTACTGCAAGGGTAAGCAATGCAGAAAGCACACCCAACACAAGGTTACCCAATACAAGGCTGGTAAGGCTTCTTTGTTCGCTCAAGGTAAGAGAAGATACGACCGTAAGCAATCCGGTTTCGGTGGTCAAACCAAGCCAGTTTTCCACAAGAAGGCTAAGACTACCAAGAAGGTTGTGTTGAGATTGGAATGTGTCGCCTGTAAGACTAAGGCTCAGTTGGCTTTGAAGAGATGTAAGCACTTCGAGTTGGGTGGTGACAAGAAGCAAAAGGGTCAAGCTTTGCAATTTTAA	151		151	GGTGGTCAAACCAAG	VALID	CCA	Proline
yHMPu5000034983_candida_tsuchiyae_210210_g004238.m1	4236	ATGGTTAACGTTCCAAAGCTCAGAAAGACTTACTGTAAGGGTAAGCAGTGCAGAAAGCACACCCAACACAAGGTTACCCAATACAAGGCTGGTAAGGCTTCCTTGTTCGCTCAGGGTAAGAGAAGATACGACCGTAAGCAGTCCGGTTTCGGTGGTCAGACCAAGCCAGTTTTCCACAAGAAGGCTAAGACCACCAAGAAGGTTGTGTTGAGATTGGAGTGTGTCTCCTGTAAGACCAAGGCTCAGTTGGCTTTGAAGAGATGTAAGCACTTCGAGTTGGGTGGTGACAAGAAGCAAAAGGGTCAAGCTTTGCAGTTTTAG	ATGGTTAACGTTCCAAAGCTCAGAAAGACTTACTGTAAGGGTAAGCAGTGCAGAAAGCACACCCAACACAAGGTTACCCAATACAAGGCTGGTAAGGCTTCCTTGTTCGCTCAGGGTAAGAGAAGATACGACCGTAAGCAGTCCGGTTTCGGTGGTCAGACCAAGCCAGTTTTCCACAAGAAGGCTAAGACCACCAAGAAGGTTGTGTTGAGATTGGAGTGTGTCTCCTGTAAGACCAAGGCTCAGTTGGCTTTGAAGAGATGTAAGCACTTCGAGTTGGGTGGTGACAAGAAGCAAAAGGGTCAAGCTTTGCAGTTTTAG	#VALUE!	151	#VALUE!	#VALUE!	#VALUE!	#VALUE!	#VALUE!
yHMPu5000035704_candida_rhizophorensis_160519_g003290.m1	4236	ATGGTTAACGTTCCCAAGCTCAGAAAGACTTACTGCAAGGGTAAGCAGTGCCGCAAGCACACCCAGCACAAGGTGACTCAGTACAAGGCCGGTAAGGCTTCCTTGTTCGCCCAGGGTAAGAGAAGATACGACCGTAAGCAGTCCGGTTTCGGTGGTCAGACCAAGCCCGTTTTCCACAAGAAGGCCAAGACCACCAAGAAGGTTGTGTTGAGATTGGAGTGTGTCAGCTGCAAGACCAAGGCCCAGTTGGCTTTGAAGAGATGCAAGCACTTCGAGTTGGGTGGTGACAAGAAGCAGAAGGGTCAAGCCTTGCAGTTTTAA	ATGGTTAACGTTCCCAAGCTCAGAAAGACTTACTGCAAGGGTAAGCAGTGCCGCAAGCACACCCAGCACAAGGTGACTCAGTACAAGGCCGGTAAGGCTTCCTTGTTCGCCCAGGGTAAGAGAAGATACGACCGTAAGCAGTCCGGTTTCGGTGGTCAGACCAAGCCCGTTTTCCACAAGAAGGCCAAGACCACCAAGAAGGTTGTGTTGAGATTGGAGTGTGTCAGCTGCAAGACCAAGGCCCAGTTGGCTTTGAAGAGATGCAAGCACTTCGAGTTGGGTGGTGACAAGAAGCAGAAGGGTCAAGCCTTGCAGTTTTAA	#VALUE!	151	#VALUE!	#VALUE!	#VALUE!	#VALUE!	#VALUE!
yHMPu5000038387_candida_inulinophila_170713_g002740.m1	4236	ATGGTTAACGTTCCAAAGCTCAGAAAGACTTACTGTAAGGGTAAGCAGTGCAGAAAGCACACCCAACACAAGGTTACCCAATACAAGGCTGGTAAGGCTTCCTTGTTCGCTCAGGGTAAGAGAAGATACGACCGTAAGCAGTCCGGTTTCGGTGGTCAGACCAAGCCAGTTTTCCACAAGAAGGCTAAGACCACCAAGAAGGTTGTGTTGAGATTGGAGTGTGTCTCCTGTAAGACCAAGGCTCAGTTGGCTTTGAAGAGATGTAAGCACTTCGAGTTGGGTGGTGACAAGAAGCAAAAGGGTCAAGCTTTGCAGTTTTAG	ATGGTTAACGTTCCAAAGCTCAGAAAGACTTACTGTAAGGGTAAGCAGTGCAGAAAGCACACCCAACACAAGGTTACCCAATACAAGGCTGGTAAGGCTTCCTTGTTCGCTCAGGGTAAGAGAAGATACGACCGTAAGCAGTCCGGTTTCGGTGGTCAGACCAAGCCAGTTTTCCACAAGAAGGCTAAGACCACCAAGAAGGTTGTGTTGAGATTGGAGTGTGTCTCCTGTAAGACCAAGGCTCAGTTGGCTTTGAAGAGATGTAAGCACTTCGAGTTGGGTGGTGACAAGAAGCAAAAGGGTCAAGCTTTGCAGTTTTAG	#VALUE!	151	#VALUE!	#VALUE!	#VALUE!	#VALUE!	#VALUE!
yHMPu5000034982_candida_ubatubensis_160519_g004801.m1	4236	ATGGTCAACGTTCCTAAGCTTAGAAAAACTTTCTGCAAGGGTAAGCAGTGCAGAAAGCACACACAGCACAAGGTCACCCAGTACAAGGCCGGTAAGGCTTCTCTCTTTGCCCAGGGTAAGAGAAGATACGACCGTAAGCAGTCCGGTTACGGTGGTCAGACCAAGCCTGTCTTCCACAAGAAGGCCAAGACCACCAAGAAGGTTGTGTTGAGATTGGAGTGTGTCAGCTGCAAGACCAAGGCTCAGTTGTCTTTGAAGAGATGTAAGCACTTCGAGTTGGGTGGTGACAAGAAGCAGAAGGGCCAGGCCTTGCAGTTCTAA	ATGGTCAACGTTCCTAAGCTTAGAAAAACTTTCTGCAAGGGTAAGCAGTGCAGAAAGCACACACAGCACAAGGTCACCCAGTACAAGGCCGGTAAGGCTTCTCTCTTTGCCCAGGGTAAGAGAAGATACGACCGTAAGCAGTCCGGTTACGGTGGTCAGACCAAGCCTGTCTTCCACAAGAAGGCCAAGACCACCAAGAAGGTTGTGTTGAGATTGGAGTGTGTCAGCTGCAAGACCAAGGCTCAGTTGTCTTTGAAGAGATGTAAGCACTTCGAGTTGGGTGGTGACAAGAAGCAGAAGGGCCAGGCCTTGCAGTTCTAA	#VALUE!	151	#VALUE!	#VALUE!	#VALUE!	#VALUE!	#VALUE!
yHMPu5000040953_metschnikowia_kipukae_201018_g000880.m1	4236	ATGGTTAACGTTCCAAAGCTTAGAAAGACATTCTGCAAAGGTAAGCAGTGTCGTAAGCACACTCAACACAAGGTCACCCAATACAAGGCCGGTAAGGCTTCCTTGTTCGCCCAAGGTAAGAGAAGATACGACCGTAAGCAATCCGGTTTCGGTGGTCAAACTAAGCCAGTTTTCCACAAGAAGGCCAAGACCACCAAGAAGGTTGTTTTGAGATTGGAGTGTGTCTCTTGTAAGACCAAGGCCCAATTGTCTTTGAAGAGATGTAAGCACTTCGAGTTGGGTGGAGACAAGAAGCAAAAGGGTCAAGCCTTGCAATTTTAA	ATGGTTAACGTTCCAAAGCTTAGAAAGACATTCTGCAAAGGTAAGCAGTGTCGTAAGCACACTCAACACAAGGTCACCCAATACAAGGCCGGTAAGGCTTCCTTGTTCGCCCAAGGTAAGAGAAGATACGACCGTAAGCAATCCGGTTTCGGTGGTCAAACTAAGCCAGTTTTCCACAAGAAGGCCAAGACCACCAAGAAGGTTGTTTTGAGATTGGAGTGTGTCTCTTGTAAGACCAAGGCCCAATTGTCTTTGAAGAGATGTAAGCACTTCGAGTTGGGTGGAGACAAGAAGCAAAAGGGTCAAGCCTTGCAATTTTAA	151		151	GGTGGTCAAACTAAG	VALID	CCA	Proline
clavispora_lusitaniae_g004246.m1	4236	ATGGTTAACGTTCCAAAGCTTAGAAAGACTTTCTGTAAGGGTAAGCAGTGCAGAAAGCACACCCAACACAAGGTCACCCAATACAAGGCTGGTAAGGCTTCCTTGTTCGCTCAAGGTAAGAGAAGATACGACCGTAAGCAATCCGGTTTCGGTGGTCAAACCAAGCCAGTTTTCCACAAGAAGGCTAAGACCACCAAGAAGGTTGTCTTGAGATTGGAATGTGTCAACTGCAAGACCAAGGCCCAATTGGCTTTGAAGAGATGTAAGCACTTTGAGTTGGGTGGTGACAAGAAGCAAAAGGGTCAAGCTTTGCAATTTTAA	ATGGTTAACGTTCCAAAGCTTAGAAAGACTTTCTGTAAGGGTAAGCAGTGCAGAAAGCACACCCAACACAAGGTCACCCAATACAAGGCTGGTAAGGCTTCCTTGTTCGCTCAAGGTAAGAGAAGATACGACCGTAAGCAATCCGGTTTCGGTGGTCAAACCAAGCCAGTTTTCCACAAGAAGGCTAAGACCACCAAGAAGGTTGTCTTGAGATTGGAATGTGTCAACTGCAAGACCAAGGCCCAATTGGCTTTGAAGAGATGTAAGCACTTTGAGTTGGGTGGTGACAAGAAGCAAAAGGGTCAAGCTTTGCAATTTTAA	151		151	GGTGGTCAAACCAAG	VALID	CCA	Proline
yHMPu5000034658_clavispora_lusitaniae_190924_g003880.m1	4236	ATGGTTAACGTTCCAAAGCTTAGAAAGACTTTCTGTAAGGGTAAGCAGTGCAGAAAGCACACCCAACACAAGGTCACCCAATACAAGGCTGGTAAGGCTTCCTTGTTCGCTCAAGGTAAGAGAAGATACGACCGTAAGCAATCCGGTTTCGGTGGTCAAACCAAGCCAGTTTTCCACAAGAAGGCTAAGACCACCAAGAAGGTTGTCTTGAGATTGGAATGTGTCAACTGCAAGACCAAGGCCCAATTGGCTTTGAAGAGATGTAAGCACTTTGAGTTGGGTGGTGACAAGAAGCAAAAGGGTCAAGCTTTGCAATTTTAA	ATGGTTAACGTTCCAAAGCTTAGAAAGACTTTCTGTAAGGGTAAGCAGTGCAGAAAGCACACCCAACACAAGGTCACCCAATACAAGGCTGGTAAGGCTTCCTTGTTCGCTCAAGGTAAGAGAAGATACGACCGTAAGCAATCCGGTTTCGGTGGTCAAACCAAGCCAGTTTTCCACAAGAAGGCTAAGACCACCAAGAAGGTTGTCTTGAGATTGGAATGTGTCAACTGCAAGACCAAGGCCCAATTGGCTTTGAAGAGATGTAAGCACTTTGAGTTGGGTGGTGACAAGAAGCAAAAGGGTCAAGCTTTGCAATTTTAA	151		151	GGTGGTCAAACCAAG	VALID	CCA	Proline
yHMPu5000034592_metschnikowia_bicuspidata_var_bicuspidata_180604_g004750.m1	4236	ATGGTTAACGTTCCAAAGCTTAGAAGAACCTTCTGTAAGGGTAAGGAATGCCGCAAGCACACCCAACACAAGGTCACCCAATACAAGGCTGGTAAGGCTTCTTTGTTTGCCCAAGGTAAGAGAAGATACGACCGTAAGCAGTCCGGTTTCGGTGGTCAGACCAAGCCAGTTTTCCACAAAAAGGCCAAGACCACCAAGAAGGTTGTCTTGAGATTGGAGTGTGTCAACTGTAAGACCAAGGCCCAGCTCTCCTTGAAGAGATGTAAGCACTTCGAGTTGGGTGGTGACAAGAAGCAAAAGGGTCAAGCTTTGCAATTCTAA	ATGGTTAACGTTCCAAAGCTTAGAAGAACCTTCTGTAAGGGTAAGGAATGCCGCAAGCACACCCAACACAAGGTCACCCAATACAAGGCTGGTAAGGCTTCTTTGTTTGCCCAAGGTAAGAGAAGATACGACCGTAAGCAGTCCGGTTTCGGTGGTCAGACCAAGCCAGTTTTCCACAAAAAGGCCAAGACCACCAAGAAGGTTGTCTTGAGATTGGAGTGTGTCAACTGTAAGACCAAGGCCCAGCTCTCCTTGAAGAGATGTAAGCACTTCGAGTTGGGTGGTGACAAGAAGCAAAAGGGTCAAGCTTTGCAATTCTAA	#VALUE!	151	#VALUE!	#VALUE!	#VALUE!	#VALUE!	#VALUE!
yHMPu5000037200_metschnikowia_anglica_210210_g003082.m1	4236	ATGGTTAACGTTCCTAAGCTTAGAAGAACCTTTTGCAAGGGTAAGGAATGCCGCAAGCACACTCAACACAAGGTCACCCAATACAAGGCTGGTAAGGCTTCTTTGTTTGCCCAAGGTAAGAGAAGATACGACCGTAAGCAATCCGGTTTCGGTGGTCAAACCAAGCCAGTTTTCCACAAAAAGGCCAAGACCACCAAGAAGGTTGTCTTGAGATTGGAGTGTGTCAACTGTAAGACCAAGGCCCAATTGTCTTTGAAGAGATGTAAGCACTTCGAGTTGGGTGGTGACAAGAAGCAAAAGGGTCAAGCTTTGCAATTTTAA	ATGGTTAACGTTCCTAAGCTTAGAAGAACCTTTTGCAAGGGTAAGGAATGCCGCAAGCACACTCAACACAAGGTCACCCAATACAAGGCTGGTAAGGCTTCTTTGTTTGCCCAAGGTAAGAGAAGATACGACCGTAAGCAATCCGGTTTCGGTGGTCAAACCAAGCCAGTTTTCCACAAAAAGGCCAAGACCACCAAGAAGGTTGTCTTGAGATTGGAGTGTGTCAACTGTAAGACCAAGGCCCAATTGTCTTTGAAGAGATGTAAGCACTTCGAGTTGGGTGGTGACAAGAAGCAAAAGGGTCAAGCTTTGCAATTTTAA	151		151	GGTGGTCAAACCAAG	VALID	CCA	Proline
yHMPu5000037201_metschnikowia_rubicola_210210_g002675.m1	4236	ATGGTTAACGTTCCAAAGCTTAGAAGAACTTTCTGTAAGGGTAAGGAGTGCCGCAAGCACACCCAGCACAAGGTCACCCAATACAAGGCTGGTAAGGCTTCTTTGTTCGCCCAGGGTAAGAGAAGATACGACCGTAAGCAGTCCGGTTTCGGTGGTCAGACCAAGCCCGTTTTCCACAAAAAGGCCAAGACCACCAAGAAGGTTGTCTTGAGATTGGAGTGTGTCAACTGCAAGACCAAGGCTCAGTTGTCCTTGAAGAGATGTAAGCACTTCGAGTTGGGTGGTGACAAGAAGCAGAAGGGCCAGGCTTTGCAATTTTAA	ATGGTTAACGTTCCAAAGCTTAGAAGAACTTTCTGTAAGGGTAAGGAGTGCCGCAAGCACACCCAGCACAAGGTCACCCAATACAAGGCTGGTAAGGCTTCTTTGTTCGCCCAGGGTAAGAGAAGATACGACCGTAAGCAGTCCGGTTTCGGTGGTCAGACCAAGCCCGTTTTCCACAAAAAGGCCAAGACCACCAAGAAGGTTGTCTTGAGATTGGAGTGTGTCAACTGCAAGACCAAGGCTCAGTTGTCCTTGAAGAGATGTAAGCACTTCGAGTTGGGTGGTGACAAGAAGCAGAAGGGCCAGGCTTTGCAATTTTAA	#VALUE!	151	#VALUE!	#VALUE!	#VALUE!	#VALUE!	#VALUE!
yHMPu5000037865_metschnikowia_reukaufii_180604.haplomerger2_g005892.m1	4236	ATGGTTAACGTTCCAAAGCTTAGAAGAACCTTTTGTAAGGGTAAGGAATGCCGCAAGCACACCCAACACAAGGTGACCCAATACAAGGCTGGTAAGGCTTCTTTGTTCGCCCAAGGTAAGAGAAGATATGACCGTAAGCAATCCGGTTTCGGTGGTCAAACCAAGCCAGTTTTCCACAAAAAGGCCAAGACCACCAAGAAGGTTGTCTTGAGATTGGAGTGTGTCAACTGTAAGACCAAGGCCCAACTCTCCTTGAAGAGATGTAAGCACTTCGAGTTGGGTGGTGACAAGAAGCAAAAGGGTCAAGCTTTGCAATTTTAA	ATGGTTAACGTTCCAAAGCTTAGAAGAACCTTTTGTAAGGGTAAGGAATGCCGCAAGCACACCCAACACAAGGTGACCCAATACAAGGCTGGTAAGGCTTCTTTGTTCGCCCAAGGTAAGAGAAGATATGACCGTAAGCAATCCGGTTTCGGTGGTCAAACCAAGCCAGTTTTCCACAAAAAGGCCAAGACCACCAAGAAGGTTGTCTTGAGATTGGAGTGTGTCAACTGTAAGACCAAGGCCCAACTCTCCTTGAAGAGATGTAAGCACTTCGAGTTGGGTGGTGACAAGAAGCAAAAGGGTCAAGCTTTGCAATTTTAA	151		151	GGTGGTCAAACCAAG	VALID	CCA	Proline
yHMPu5000037866_metschnikowia_lachancei_180604_g001476.m1	4236	ATGGTTAACGTTCCAAAGCTTAGAAGAACCTTTTGTAAGGGTAAGGAATGCCGCAAGCACACTCAACACAAGGTCACCCAATACAAGGCTGGTAAGGCTTCTTTGTTTGCCCAAGGTAAGAGAAGATACGACCGTAAGCAATCCGGTTTCGGTGGTCAAACCAAGCCAGTTTTCCACAAAAAGGCCAAGACCACCAAGAAGGTTGTCTTGAGATTGGAGTGTGTCAACTGTAAGACCAAGGCTCAATTGTCCTTGAAGAGATGTAAGCACTTCGAGTTGGGTGGTGACAAGAAGCAAAAGGGTCAAGCTTTGCAATTTTAA	ATGGTTAACGTTCCAAAGCTTAGAAGAACCTTTTGTAAGGGTAAGGAATGCCGCAAGCACACTCAACACAAGGTCACCCAATACAAGGCTGGTAAGGCTTCTTTGTTTGCCCAAGGTAAGAGAAGATACGACCGTAAGCAATCCGGTTTCGGTGGTCAAACCAAGCCAGTTTTCCACAAAAAGGCCAAGACCACCAAGAAGGTTGTCTTGAGATTGGAGTGTGTCAACTGTAAGACCAAGGCTCAATTGTCCTTGAAGAGATGTAAGCACTTCGAGTTGGGTGGTGACAAGAAGCAAAAGGGTCAAGCTTTGCAATTTTAA	151		151	GGTGGTCAAACCAAG	VALID	CCA	Proline
yHMPu5000037867_metschnikowia_fructicola_190924.haplomerger2_g007246.m1	4236	ATGGTTAACGTTCCAAAGCTTAGAAGAACTTTCTGTAAGGGTAAGGAGTGCCGCAAGCACACCCAGCACAAGGTCACCCAATACAAGGCTGGTAAGGCTTCCTTGTTCGCCCAGGGTAAGAGAAGATACGACCGTAAGCAGTCCGGTTTCGGTGGTCAGACCAAGCCCGTTTTCCACAAAAAGGCCAAGACCACCAAGAAGGTTGTCTTGAGATTGGAGTGTGTCAACTGCAAGACCAAGGCTCAGTTGTCCTTGAAGAGATGTAAGCACTTCGAGTTGGGTGGTGACAAGAAGCAGAAGGGCCAGGCTTTGCAATTTTAA	ATGGTTAACGTTCCAAAGCTTAGAAGAACTTTCTGTAAGGGTAAGGAGTGCCGCAAGCACACCCAGCACAAGGTCACCCAATACAAGGCTGGTAAGGCTTCCTTGTTCGCCCAGGGTAAGAGAAGATACGACCGTAAGCAGTCCGGTTTCGGTGGTCAGACCAAGCCCGTTTTCCACAAAAAGGCCAAGACCACCAAGAAGGTTGTCTTGAGATTGGAGTGTGTCAACTGCAAGACCAAGGCTCAGTTGTCCTTGAAGAGATGTAAGCACTTCGAGTTGGGTGGTGACAAGAAGCAGAAGGGCCAGGCTTTGCAATTTTAA	#VALUE!	151	#VALUE!	#VALUE!	#VALUE!	#VALUE!	#VALUE!
yHMPu5000037890_candida_pimensis_180604.haplomerger2_g002740.m1	4236	ATGGTTAACGTTCCAAAGCTTAGAAGAACTTTCTGTAAGGGTAAGGAGTGCCGCAAGCACACCCAGCACAAGGTCACCCAATACAAGGCTGGTAAGGCTTCCTTGTTCGCCCAGGGTAAGAGAAGATATGACCGTAAGCAGTCCGGTTTCGGTGGTCAGACCAAGCCCGTTTTCCACAAAAAGGCCAAGACCACCAAGAAGGTTGTCTTGAGATTGGAGTGTGTCAACTGCAAGACCAAGGCCCAGTTGTCCTTGAAGAGATGTAAGCACTTCGAGTTGGGTGGTGACAAGAAGCAGAAGGGCCAGGCTTTGCAATTTTAA	ATGGTTAACGTTCCAAAGCTTAGAAGAACTTTCTGTAAGGGTAAGGAGTGCCGCAAGCACACCCAGCACAAGGTCACCCAATACAAGGCTGGTAAGGCTTCCTTGTTCGCCCAGGGTAAGAGAAGATATGACCGTAAGCAGTCCGGTTTCGGTGGTCAGACCAAGCCCGTTTTCCACAAAAAGGCCAAGACCACCAAGAAGGTTGTCTTGAGATTGGAGTGTGTCAACTGCAAGACCAAGGCCCAGTTGTCCTTGAAGAGATGTAAGCACTTCGAGTTGGGTGGTGACAAGAAGCAGAAGGGCCAGGCTTTGCAATTTTAA	#VALUE!	151	#VALUE!	#VALUE!	#VALUE!	#VALUE!	#VALUE!
yHMPu5000037891_candida_picachoensis_170210.haplomerger2_g000024.m1	4236	ATGGTTAACGTTCCAAAGCTTAGAAGAACTTTCTGTAAGGGTAAGGAGTGCCGCAAGCACACCCAGCACAAGGTCACCCAATACAAGGCTGGTAAGGCTTCCTTGTTCGCCCAGGGTAAGAGAAGATATGACCGTAAGCAGTCCGGTTTCGGTGGTCAGACCAAGCCCGTTTTCCACAAAAAGGCCAAGACCACCAAGAAGGTTGTCTTGAGATTGGAGTGTGTCAACTGCAAGACCAAGGCCCAGTTGTCCTTGAAGAGATGTAAGCACTTCGAGTTGGGTGGTGACAAGAAGCAGAAGGGCCAGGCTTTGCAATTTTAA	ATGGTTAACGTTCCAAAGCTTAGAAGAACTTTCTGTAAGGGTAAGGAGTGCCGCAAGCACACCCAGCACAAGGTCACCCAATACAAGGCTGGTAAGGCTTCCTTGTTCGCCCAGGGTAAGAGAAGATATGACCGTAAGCAGTCCGGTTTCGGTGGTCAGACCAAGCCCGTTTTCCACAAAAAGGCCAAGACCACCAAGAAGGTTGTCTTGAGATTGGAGTGTGTCAACTGCAAGACCAAGGCCCAGTTGTCCTTGAAGAGATGTAAGCACTTCGAGTTGGGTGGTGACAAGAAGCAGAAGGGCCAGGCTTTGCAATTTTAA	#VALUE!	151	#VALUE!	#VALUE!	#VALUE!	#VALUE!	#VALUE!
yHMPu5000037898_candida_kofuensis_190924_g002798.m1	4236	ATGGTTAACGTTCCAAAGCTTAGAAGAACCTTCTGTAAGGGTAAGGAATGCCGCAAGCACACCCAGCACAAGGTCACCCAATACAAGGCTGGTAAGGCTTCTTTGTTTGCCCAAGGTAAGAGAAGATACGACCGTAAGCAGTCCGGTTTCGGTGGTCAGACCAAGCCAGTTTTCCACAAAAAGGCCAAGACCACCAAGAAGGTTGTCTTGAGATTGGAGTGTGTCAACTGTAAGACCAAGGCCCAACTCTCCTTGAAGAGATGTAAGCACTTCGAGTTGGGTGGTGACAAGAAGCAAAAGGGTCAAGCTTTGCAATTTTAG	ATGGTTAACGTTCCAAAGCTTAGAAGAACCTTCTGTAAGGGTAAGGAATGCCGCAAGCACACCCAGCACAAGGTCACCCAATACAAGGCTGGTAAGGCTTCTTTGTTTGCCCAAGGTAAGAGAAGATACGACCGTAAGCAGTCCGGTTTCGGTGGTCAGACCAAGCCAGTTTTCCACAAAAAGGCCAAGACCACCAAGAAGGTTGTCTTGAGATTGGAGTGTGTCAACTGTAAGACCAAGGCCCAACTCTCCTTGAAGAGATGTAAGCACTTCGAGTTGGGTGGTGACAAGAAGCAAAAGGGTCAAGCTTTGCAATTTTAG	#VALUE!	151	#VALUE!	#VALUE!	#VALUE!	#VALUE!	#VALUE!
yHMPu5000038329_metschnikowia_koreensis_180604.haplomerger2_g004501.m1	4236	ATGGTTAACGTTCCAAAGCTTAGAAGAACCTTTTGTAAGGGTAAGGAGTGCCGTAAGCACACCCAACACAAGGTTACCCAATACAAGGCTGGTAAGGCTTCTTTGTTTGCCCAAGGTAAGAGAAGATACGACCGTAAGCAATCCGGTTTCGGTGGTCAAACCAAGCCAGTTTTCCACAAAAAGGCCAAGACCACCAAGAAGGTTGTCTTGAGATTGGAGTGTGTCAACTGTAAGACCAAGGCCCAACTTTCCTTGAAGAGATGTAAGCACTTCGAGTTGGGTGGTGACAAGAAGCAAAAGGGTCAAGCTTTGCAATTTTAA	ATGGTTAACGTTCCAAAGCTTAGAAGAACCTTTTGTAAGGGTAAGGAGTGCCGTAAGCACACCCAACACAAGGTTACCCAATACAAGGCTGGTAAGGCTTCTTTGTTTGCCCAAGGTAAGAGAAGATACGACCGTAAGCAATCCGGTTTCGGTGGTCAAACCAAGCCAGTTTTCCACAAAAAGGCCAAGACCACCAAGAAGGTTGTCTTGAGATTGGAGTGTGTCAACTGTAAGACCAAGGCCCAACTTTCCTTGAAGAGATGTAAGCACTTCGAGTTGGGTGGTGACAAGAAGCAAAAGGGTCAAGCTTTGCAATTTTAA	151		151	GGTGGTCAAACCAAG	VALID	CCA	Proline
yHMPu5000041805_metschnikowia_sinensis_190924.haplomerger2_g002455.m1	4236	ATGGTTAACGTTCCAAAGCTTAGAAGAACTTTCTGTAAGGGTAAGGAGTGCCGCAAGCACACCCAGCACAAGGTCACCCAATACAAGGCTGGTAAGGCTTCCTTGTTCGCCCAGGGTAAGAGAAGATACGACCGTAAGCAGTCCGGTTTCGGTGGTCAGACCAAGCCCGTTTTCCACAAAAAGGCCAAGACCACCAAGAAGGTTGTCTTGAGATTGGAGTGTGTCAACTGCAAGACCAAGGCTCAGTTGTCCTTGAAGAGATGTAAGCACTTCGAGTTGGGTGGTGACAAGAAGCAGAAGGGCCAGGCTTTGCAATTTTAA	ATGGTTAACGTTCCAAAGCTTAGAAGAACTTTCTGTAAGGGTAAGGAGTGCCGCAAGCACACCCAGCACAAGGTCACCCAATACAAGGCTGGTAAGGCTTCCTTGTTCGCCCAGGGTAAGAGAAGATACGACCGTAAGCAGTCCGGTTTCGGTGGTCAGACCAAGCCCGTTTTCCACAAAAAGGCCAAGACCACCAAGAAGGTTGTCTTGAGATTGGAGTGTGTCAACTGCAAGACCAAGGCTCAGTTGTCCTTGAAGAGATGTAAGCACTTCGAGTTGGGTGGTGACAAGAAGCAGAAGGGCCAGGCTTTGCAATTTTAA	#VALUE!	151	#VALUE!	#VALUE!	#VALUE!	#VALUE!	#VALUE!
yHMPu5000041814_metschnikowia_noctiluminum_180604.haplomerger2_g003573.m1	4236	ATGGTTAACGTTCCAAAGCTCAGAAGAACCTTCTGTAAGGGTAAGGAATGCCGCAAGCACACTCAACACAAAGTCACCCAATACAAGGCTGGTAAGGCTTCTTTGTTTGCTCAAGGTAAGAGAAGATACGACCGCAAGCAATCCGGTTTCGGTGGTCAGACCAAGCCAGTTTTCCACAAAAAGGCCAAGACCACCAAGAAGGTTGTCTTGAGATTGGAGTGTGTCAACTGTAAGACCAAGGCCCAACTCTCCTTGAAGAGATGTAAGCACTTTGAGTTGGGTGGTGACAAGAAGCAAAAGGGTCAAGCCTTGCAATTTTAA	ATGGTTAACGTTCCAAAGCTCAGAAGAACCTTCTGTAAGGGTAAGGAATGCCGCAAGCACACTCAACACAAAGTCACCCAATACAAGGCTGGTAAGGCTTCTTTGTTTGCTCAAGGTAAGAGAAGATACGACCGCAAGCAATCCGGTTTCGGTGGTCAGACCAAGCCAGTTTTCCACAAAAAGGCCAAGACCACCAAGAAGGTTGTCTTGAGATTGGAGTGTGTCAACTGTAAGACCAAGGCCCAACTCTCCTTGAAGAGATGTAAGCACTTTGAGTTGGGTGGTGACAAGAAGCAAAAGGGTCAAGCCTTGCAATTTTAA	#VALUE!	151	#VALUE!	#VALUE!	#VALUE!	#VALUE!	#VALUE!
yHMPu5000041817_metschnikowia_shanxiensis_190924.haplomerger2_g002751.m1	4236	ATGGTTAACGTTCCAAAGCTTAGAAGAACTTTCTGTAAGGGTAAGGAGTGCCGCAAGCACACCCAGCACAAGGTCACCCAATACAAGGCTGGTAAGGCTTCTTTGTTCGCCCAGGGTAAGAGAAGATACGACCGTAAGCAGTCCGGTTTCGGTGGTCAGACCAAGCCCGTTTTCCACAAAAAGGCCAAGACCACCAAGAAGGTTGTCTTGAGATTGGAGTGTGTCAACTGCAAGACCAAGGCTCAGTTGTCCTTGAAGAGATGTAAGCACTTCGAGTTGGGTGGTGACAAGAAGCAGAAGGGCCAGGCTTTGCAATTTTAA	ATGGTTAACGTTCCAAAGCTTAGAAGAACTTTCTGTAAGGGTAAGGAGTGCCGCAAGCACACCCAGCACAAGGTCACCCAATACAAGGCTGGTAAGGCTTCTTTGTTCGCCCAGGGTAAGAGAAGATACGACCGTAAGCAGTCCGGTTTCGGTGGTCAGACCAAGCCCGTTTTCCACAAAAAGGCCAAGACCACCAAGAAGGTTGTCTTGAGATTGGAGTGTGTCAACTGCAAGACCAAGGCTCAGTTGTCCTTGAAGAGATGTAAGCACTTCGAGTTGGGTGGTGACAAGAAGCAGAAGGGCCAGGCTTTGCAATTTTAA	#VALUE!	151	#VALUE!	#VALUE!	#VALUE!	#VALUE!	#VALUE!
yHMPu5000041861_candida_gelsemii_170307.haplomerger2_g002782.m1	4236	ATGGTTAACGTTCCTAAGCTTAGAAGAACTTTCTGTAAGGGTAAGGAATGCCGCAAGCACACCCAACACAAGGTCACCCAATACAAGGCTGGTAAGGCTTCCTTGTTCGCCCAAGGTAAGAGAAGATACGACCGTAAGCAATCCGGTTTCGGTGGTCAAACCAAGCCAGTTTTCCACAAAAAAGCCAAGACCACCAAGAAGGTTGTCTTGAGATTGGAGTGTGTCAACTGTAAGACCAAGGCTCAATTGTCCTTGAAGAGATGTAAGCACTTCGAGTTGGGTGGTGACAAGAAGCAAAAGGGTCAAGCTTTGCAATTTTAA	ATGGTTAACGTTCCTAAGCTTAGAAGAACTTTCTGTAAGGGTAAGGAATGCCGCAAGCACACCCAACACAAGGTCACCCAATACAAGGCTGGTAAGGCTTCCTTGTTCGCCCAAGGTAAGAGAAGATACGACCGTAAGCAATCCGGTTTCGGTGGTCAAACCAAGCCAGTTTTCCACAAAAAAGCCAAGACCACCAAGAAGGTTGTCTTGAGATTGGAGTGTGTCAACTGTAAGACCAAGGCTCAATTGTCCTTGAAGAGATGTAAGCACTTCGAGTTGGGTGGTGACAAGAAGCAAAAGGGTCAAGCTTTGCAATTTTAA	151		151	GGTGGTCAAACCAAG	VALID	CCA	Proline
yHMPu5000037208_metschnikowia_baotianmanensis_210210_g000974.m1	4236	ATGGTTAACGTTCCAAAGCTTAGAAAGACTTTCTGTAAGGGTAAGGAATGCCGCAAGCACACCCAACACAAGGTCACCCAATACAAGGCTGGTAAGGCTTCTTTGTTTGCCCAGGGTAAGAGAAGATACGACCGTAAGCAGTCCGGTTTCGGTGGTCAGACCAAGCCAGTTTTCCACAAAAAGGCCAAGACCACCAAGAAGGTTGTCTTGAGATTGGAGTGTGTCAACTGTAAGACCAAGGCCCAGCTCTCCTTGAAGAGATGTAAGCACTTCGAGTTGGGTGGAGACAAGAAGCAGAAGGGTCAAGCTTTGCAATTTTAA	ATGGTTAACGTTCCAAAGCTTAGAAAGACTTTCTGTAAGGGTAAGGAATGCCGCAAGCACACCCAACACAAGGTCACCCAATACAAGGCTGGTAAGGCTTCTTTGTTTGCCCAGGGTAAGAGAAGATACGACCGTAAGCAGTCCGGTTTCGGTGGTCAGACCAAGCCAGTTTTCCACAAAAAGGCCAAGACCACCAAGAAGGTTGTCTTGAGATTGGAGTGTGTCAACTGTAAGACCAAGGCCCAGCTCTCCTTGAAGAGATGTAAGCACTTCGAGTTGGGTGGAGACAAGAAGCAGAAGGGTCAAGCTTTGCAATTTTAA	#VALUE!	151	#VALUE!	#VALUE!	#VALUE!	#VALUE!	#VALUE!
yHMPu5000041804_metschnikowia_vanudenii_190924_g005290.m1	4236	ATGGTTAACGTTCCAAAGCTTAGAAAAACCTTCTGTAAGGGTAAGGAATGCCGTAAGCACACCCAACACAAGGTCACCCAATACAAGGCTGGTAAGGCTTCTTTGTTCGCCCAAGGTAAGAGAAGATACGACCGTAAGCAATCCGGTTTCGGTGGTCAAACCAAGCCAGTTTTCCACAAAAAGGCCAAGACTACCAAGAAGGTTGTCTTGAGATTGGAGTGTGTCAACTGTAAGACCAAGGCTCAATTGTCCTTGAAGAGATGTAAGCACTTCGAGTTGGGTGGTGACAAGAAGCAAAAGGGTCAAGCTTTGCAATTTTAA	ATGGTTAACGTTCCAAAGCTTAGAAAAACCTTCTGTAAGGGTAAGGAATGCCGTAAGCACACCCAACACAAGGTCACCCAATACAAGGCTGGTAAGGCTTCTTTGTTCGCCCAAGGTAAGAGAAGATACGACCGTAAGCAATCCGGTTTCGGTGGTCAAACCAAGCCAGTTTTCCACAAAAAGGCCAAGACTACCAAGAAGGTTGTCTTGAGATTGGAGTGTGTCAACTGTAAGACCAAGGCTCAATTGTCCTTGAAGAGATGTAAGCACTTCGAGTTGGGTGGTGACAAGAAGCAAAAGGGTCAAGCTTTGCAATTTTAA	151		151	GGTGGTCAAACCAAG	VALID	CCA	Proline
yHMPu5000041811_metschnikowia_krissii_170307.haplomerger2_g002956.m1	4236	ATGGTTAACGTTCCAAAGCTTAGAAAGACTTTCTGTAAGGGCAAGGAGTGCCGCAAGCACACGCAACACAAGGTCACCCAATACAAGGCTGGTAAGGCTTCTTTGTTTGCCCAGGGTAAGAGAAGATACGACCGTAAGCAATCCGGTTTCGGTGGTCAGACCAAGCCCGTTTTCCACAAGAAGGCCAAGACCACCAAGAAGGTTGTCTTGAGATTGGAGTGTGTCAACTGCAAAACCAAGGCCCAGCTTTCCTTGAAGAGATGTAAGCACTTCGAGTTGGGTGGTGACAAGAAGCAAAAGGGTCAAGCTTTGCAGTTCTAA	ATGGTTAACGTTCCAAAGCTTAGAAAGACTTTCTGTAAGGGCAAGGAGTGCCGCAAGCACACGCAACACAAGGTCACCCAATACAAGGCTGGTAAGGCTTCTTTGTTTGCCCAGGGTAAGAGAAGATACGACCGTAAGCAATCCGGTTTCGGTGGTCAGACCAAGCCCGTTTTCCACAAGAAGGCCAAGACCACCAAGAAGGTTGTCTTGAGATTGGAGTGTGTCAACTGCAAAACCAAGGCCCAGCTTTCCTTGAAGAGATGTAAGCACTTCGAGTTGGGTGGTGACAAGAAGCAAAAGGGTCAAGCTTTGCAGTTCTAA	#VALUE!	151	#VALUE!	#VALUE!	#VALUE!	#VALUE!	#VALUE!
yHMPu5000041812_metschnikowia_kunwiensis_190924_g002011.m1	4236	ATGGTTAACGTTCCAAAGCTTAGAAAAACCTTCTGTAAGGGCAAGGAGTGCCGCAAGCACACCCAGCACAAGGTCACCCAATACAAGGCTGGTAAGGCTTCTTTGTTTGCCCAGGGTAAGAGAAGATACGACCGTAAGCAGTCCGGTTTCGGTGGTCAGACCAAGCCAGTTTTCCACAAAAAGGCCAAGACCACCAAGAAGGTTGTCTTGAGATTGGAGTGTGTCAACTGTAAGACCAAGGCTCAGTTGTCTTTGAAGAGATGTAAGCACTTCGAGTTGGGTGGAGACAAGAAGCAAAAGGGTCAAGCTTTGCAATTTTAA	ATGGTTAACGTTCCAAAGCTTAGAAAAACCTTCTGTAAGGGCAAGGAGTGCCGCAAGCACACCCAGCACAAGGTCACCCAATACAAGGCTGGTAAGGCTTCTTTGTTTGCCCAGGGTAAGAGAAGATACGACCGTAAGCAGTCCGGTTTCGGTGGTCAGACCAAGCCAGTTTTCCACAAAAAGGCCAAGACCACCAAGAAGGTTGTCTTGAGATTGGAGTGTGTCAACTGTAAGACCAAGGCTCAGTTGTCTTTGAAGAGATGTAAGCACTTCGAGTTGGGTGGAGACAAGAAGCAAAAGGGTCAAGCTTTGCAATTTTAA	#VALUE!	151	#VALUE!	#VALUE!	#VALUE!	#VALUE!	#VALUE!
yHMPu5000041857_candida_chrysomelidarum_160928.haplomerger2_g004021.m1	4236	ATGGTTAACGTTCCAAAGCTTAGAAAGACTTTCTGTAAGGGTAAGGAATGCCGTAAGCACACCCAGCACAAGGTTACCCAATACAAGGCTGGTAAGGCTTCCTTGTTCGCCCAGGGTAAGAGAAGATACGACCGTAAGCAGTCCGGTTTCGGTGGTCAGACCAAGCCCGTTTTCCACAAGAAGGCCAAGACCACCAAGAAGGTTGTCTTGAGATTGGAGTGTGTCAACTGTAAGACCAAGGCTCAGTTGGCCTTGAAGAGATGTAAGCACTTCGAGTTGGGTGGTGACAAGAAGCAGAAGGGTCAAGCCTTGCAGTTCTAA	ATGGTTAACGTTCCAAAGCTTAGAAAGACTTTCTGTAAGGGTAAGGAATGCCGTAAGCACACCCAGCACAAGGTTACCCAATACAAGGCTGGTAAGGCTTCCTTGTTCGCCCAGGGTAAGAGAAGATACGACCGTAAGCAGTCCGGTTTCGGTGGTCAGACCAAGCCCGTTTTCCACAAGAAGGCCAAGACCACCAAGAAGGTTGTCTTGAGATTGGAGTGTGTCAACTGTAAGACCAAGGCTCAGTTGGCCTTGAAGAGATGTAAGCACTTCGAGTTGGGTGGTGACAAGAAGCAGAAGGGTCAAGCCTTGCAGTTCTAA	#VALUE!	151	#VALUE!	#VALUE!	#VALUE!	#VALUE!	#VALUE!
yHMPu5000034984_candida_sharkiensis_160519_g004154.m1	4236	ATGGTTAACGTTCCAAAGCTCAGAAAGACTTACTGTAAGGGTAAGCAGTGCAGAAAGCACACCCAACACAAGGTTACCCAATACAAGGCTGGTAAGGCTTCTTTGTTCGCCCAGGGTAAGAGAAGATACGACCGTAAGCAGTCTGGTTTCGGTGGTCAGACCAAGCCAGTTTTCCACAAGAAGGCCAAGACCACCAAGAAGGTTGTTTTGAGATTGGAGTGTGTCAACTGTAAGACCAAGGCTCAGTTGTCTTTGAAGAGATGTAAGCACTTCGAGTTGGGTGGTGACAAGAAGCAAAAGGGCCAAGCTTTGCAGTTTTAG	ATGGTTAACGTTCCAAAGCTCAGAAAGACTTACTGTAAGGGTAAGCAGTGCAGAAAGCACACCCAACACAAGGTTACCCAATACAAGGCTGGTAAGGCTTCTTTGTTCGCCCAGGGTAAGAGAAGATACGACCGTAAGCAGTCTGGTTTCGGTGGTCAGACCAAGCCAGTTTTCCACAAGAAGGCCAAGACCACCAAGAAGGTTGTTTTGAGATTGGAGTGTGTCAACTGTAAGACCAAGGCTCAGTTGTCTTTGAAGAGATGTAAGCACTTCGAGTTGGGTGGTGACAAGAAGCAAAAGGGCCAAGCTTTGCAGTTTTAG	#VALUE!	151	#VALUE!	#VALUE!	#VALUE!	#VALUE!	#VALUE!
yHMPu5000034985_candida_pseudointermedia_160613_g002742.m1	4236	ATGGTTAACGTTCCTAAGCTCAGAAAGACTTACTGTAAGGGTAAGCAGTGCAGAAAGCACACCCAACACAAGGTTACCCAATACAAGGCTGGTAAGGCTTCCTTGTTCGCTCAGGGTAAGAGAAGATACGACCGTAAGCAGTCCGGTTTCGGTGGTCAGACCAAGCCAGTTTTCCACAAGAAGGCTAAGACCACCAAGAAGGTTGTTTTGAGATTGGAGTGTGTCAACTGTAAGACCAAGGCTCAGTTGGCTTTGAAGAGATGTAAGCACTTCGAGTTGGGTGGTGACAAGAAGCAAAAGGGTCAAGCTTTGCAGTTTTAG	ATGGTTAACGTTCCTAAGCTCAGAAAGACTTACTGTAAGGGTAAGCAGTGCAGAAAGCACACCCAACACAAGGTTACCCAATACAAGGCTGGTAAGGCTTCCTTGTTCGCTCAGGGTAAGAGAAGATACGACCGTAAGCAGTCCGGTTTCGGTGGTCAGACCAAGCCAGTTTTCCACAAGAAGGCTAAGACCACCAAGAAGGTTGTTTTGAGATTGGAGTGTGTCAACTGTAAGACCAAGGCTCAGTTGGCTTTGAAGAGATGTAAGCACTTCGAGTTGGGTGGTGACAAGAAGCAAAAGGGTCAAGCTTTGCAGTTTTAG	#VALUE!	151	#VALUE!	#VALUE!	#VALUE!	#VALUE!	#VALUE!
yHMPu5000034987_candida_intermedia_160519_g002389.m1	4236	ATGGTTAACGTTCCTAAGCTCAGAAAGACTTACTGTAAGGGTAAGCAGTGCAGAAAGCACACCCAACACAAGGTTACCCAATACAAGGCTGGTAAGGCTTCCTTGTTCGCTCAGGGTAAGAGAAGATACGACCGTAAGCAGTCCGGTTTCGGTGGTCAGACCAAGCCAGTTTTCCACAAGAAGGCTAAGACCACCAAGAAGGTTGTTTTGAGATTGGAGTGTGTCAACTGTAAGACCAAGGCTCAGTTGGCTTTGAAGAGATGTAAGCACTTCGAGTTGGGTGGTGACAAGAAGCAAAAGGGTCAAGCTTTGCAGTTTTAG	ATGGTTAACGTTCCTAAGCTCAGAAAGACTTACTGTAAGGGTAAGCAGTGCAGAAAGCACACCCAACACAAGGTTACCCAATACAAGGCTGGTAAGGCTTCCTTGTTCGCTCAGGGTAAGAGAAGATACGACCGTAAGCAGTCCGGTTTCGGTGGTCAGACCAAGCCAGTTTTCCACAAGAAGGCTAAGACCACCAAGAAGGTTGTTTTGAGATTGGAGTGTGTCAACTGTAAGACCAAGGCTCAGTTGGCTTTGAAGAGATGTAAGCACTTCGAGTTGGGTGGTGACAAGAAGCAAAAGGGTCAAGCTTTGCAGTTTTAG	#VALUE!	151	#VALUE!	#VALUE!	#VALUE!	#VALUE!	#VALUE!
yHMPu5000038383_candida_middelhoveniana_170713_g004157.m1	4236	ATGGTTAACGTTCCAAAGCTCAGAAAGACTTACTGTAAGGGTAAGCAGTGCAGAAAGCACACCCAACACAAGGTTACCCAATACAAGGCTGGTAAGGCTTCTTTGTTCGCTCAGGGTAAGAGAAGATACGACCGTAAGCAGTCCGGTTTCGGTGGTCAGACCAAGCCAGTTTTCCACAAGAAGGCTAAGACCACCAAGAAGGTTGTGTTGAGATTGGAGTGTGTCAACTGTAAGACCAAGGCCCAGTTGGCTTTGAAGAGATGTAAGCACTTCGAGTTGGGTGGTGACAAGAAGCAAAAGGGTCAAGCTTTGCAGTTTTAG	ATGGTTAACGTTCCAAAGCTCAGAAAGACTTACTGTAAGGGTAAGCAGTGCAGAAAGCACACCCAACACAAGGTTACCCAATACAAGGCTGGTAAGGCTTCTTTGTTCGCTCAGGGTAAGAGAAGATACGACCGTAAGCAGTCCGGTTTCGGTGGTCAGACCAAGCCAGTTTTCCACAAGAAGGCTAAGACCACCAAGAAGGTTGTGTTGAGATTGGAGTGTGTCAACTGTAAGACCAAGGCCCAGTTGGCTTTGAAGAGATGTAAGCACTTCGAGTTGGGTGGTGACAAGAAGCAAAAGGGTCAAGCTTTGCAGTTTTAG	#VALUE!	151	#VALUE!	#VALUE!	#VALUE!	#VALUE!	#VALUE!
yHMPu5000038390_candida_ezoensis_170713_g002278.m1	4236	ATGGTTAACGTTCCAAAGCTCAGAAAGACTTACTGTAAGGGTAAGCAGTGCAGAAAGCACACCCAACATAAGGTTACCCAATACAAGGCTGGTAAGGCTTCTTTGTTCGCTCAGGGTAAGAGAAGATACGACCGTAAGCAGTCCGGTTTCGGTGGTCAGACCAAGCCAGTTTTCCACAAGAAGGCTAAGACCACCAAGAAGGTTGTGTTGAGATTGGAGTGTGTCAACTGTAAGACCAAGGCCCAGTTGGCTTTGAAGAGATGTAAGCACTTCGAGTTGGGTGGTGACAAGAAGCAAAAGGGTCAAGCTTTGCAGTTTTAG	ATGGTTAACGTTCCAAAGCTCAGAAAGACTTACTGTAAGGGTAAGCAGTGCAGAAAGCACACCCAACATAAGGTTACCCAATACAAGGCTGGTAAGGCTTCTTTGTTCGCTCAGGGTAAGAGAAGATACGACCGTAAGCAGTCCGGTTTCGGTGGTCAGACCAAGCCAGTTTTCCACAAGAAGGCTAAGACCACCAAGAAGGTTGTGTTGAGATTGGAGTGTGTCAACTGTAAGACCAAGGCCCAGTTGGCTTTGAAGAGATGTAAGCACTTCGAGTTGGGTGGTGACAAGAAGCAAAAGGGTCAAGCTTTGCAGTTTTAG	#VALUE!	151	#VALUE!	#VALUE!	#VALUE!	#VALUE!	#VALUE!
yHMPu5000038406_candida_berkhoutiae_180604_g004549.m1	4236	ATGGTTAACGTTCCAAAGCTCAGAAAGACTTACTGTAAGGGTAAGCAGTGCAGAAAGCACACCCAACACAAGGTTACCCAATACAAGGCTGGTAAGGCTTCTTTGTTCGCTCAGGGTAAGAGAAGATACGACCGTAAGCAGTCCGGTTTCGGTGGTCAGACCAAGCCAGTTTTCCACAAGAAGGCTAAGACTACCAAGAAGGTTGTGTTGAGATTGGAGTGTGTCAACTGTAAGACCAAGGCCCAGTTGGCTTTGAAGAGATGTAAGCACTTCGAGTTGGGTGGTGACAAGAAGCAAAAGGGTCAAGCTTTGCAGTTTTAG	ATGGTTAACGTTCCAAAGCTCAGAAAGACTTACTGTAAGGGTAAGCAGTGCAGAAAGCACACCCAACACAAGGTTACCCAATACAAGGCTGGTAAGGCTTCTTTGTTCGCTCAGGGTAAGAGAAGATACGACCGTAAGCAGTCCGGTTTCGGTGGTCAGACCAAGCCAGTTTTCCACAAGAAGGCTAAGACTACCAAGAAGGTTGTGTTGAGATTGGAGTGTGTCAACTGTAAGACCAAGGCCCAGTTGGCTTTGAAGAGATGTAAGCACTTCGAGTTGGGTGGTGACAAGAAGCAAAAGGGTCAAGCTTTGCAGTTTTAG	#VALUE!	151	#VALUE!	#VALUE!	#VALUE!	#VALUE!	#VALUE!
yHMPu5000038355_candida_suratensis_170713_g002911.m1	4236	ATGGTTAACGTTCCAAAGCTCAGAAAGACTTACTGTAAGGGTAAGCAGTGCAAGAAGCACACCCAACACAAGGTTACCCAATACAAGGCTGGTAAGGCTTCCTTGTTCGCTCAGGGTAAGAGAAGATACGACCGTAAGCAATCCGGTTTCGGTGGTCAGACCAAGCCAGTTTTCCACAAGAAGGCTAAGACTACCAAGAAGGTTGTCTTGAGATTGGAGTGTGTCAACTGTAAGACCAAGGCTCAGTTGGCTTTGAAGAGATGTAAGCACTTCGAGTTGGGTGGTGACAAGAAGCAAAAGGGTCAAGCTTTGCAATTTTAA	ATGGTTAACGTTCCAAAGCTCAGAAAGACTTACTGTAAGGGTAAGCAGTGCAAGAAGCACACCCAACACAAGGTTACCCAATACAAGGCTGGTAAGGCTTCCTTGTTCGCTCAGGGTAAGAGAAGATACGACCGTAAGCAATCCGGTTTCGGTGGTCAGACCAAGCCAGTTTTCCACAAGAAGGCTAAGACTACCAAGAAGGTTGTCTTGAGATTGGAGTGTGTCAACTGTAAGACCAAGGCTCAGTTGGCTTTGAAGAGATGTAAGCACTTCGAGTTGGGTGGTGACAAGAAGCAAAAGGGTCAAGCTTTGCAATTTTAA	#VALUE!	151	#VALUE!	#VALUE!	#VALUE!	#VALUE!	#VALUE!
yHMPu5000038356_candida_thailandica_170912_g000325.m1	4236	ATGGTTAACGTTCCAAAGCTCAGAAAGACTTACTGTAAGGGTAAGCAGTGCAAGAAGCACACCCAGCACAAGGTTACTCAGTACAAGGCTGGTAAGGCATCTTTGTTTGCTCAGGGTAAGAGAAGATACGACCGTAAGCAGTCTGGTTTCGGTGGTCAGACCAAGCCCGTTTTCCACAAGAAGGCCAAGACTACCAAGAAGGTTGTGTTGAGATTGGAGTGTGTCAACTGTAAGACTAAGGCTCAGTTGGCTTTGAAGAGATGCAAGCACTTCGAGTTGGGTGGTGACAAGAAGCAGAAGGGCCAGGCCTTGCAGTTCTAA	ATGGTTAACGTTCCAAAGCTCAGAAAGACTTACTGTAAGGGTAAGCAGTGCAAGAAGCACACCCAGCACAAGGTTACTCAGTACAAGGCTGGTAAGGCATCTTTGTTTGCTCAGGGTAAGAGAAGATACGACCGTAAGCAGTCTGGTTTCGGTGGTCAGACCAAGCCCGTTTTCCACAAGAAGGCCAAGACTACCAAGAAGGTTGTGTTGAGATTGGAGTGTGTCAACTGTAAGACTAAGGCTCAGTTGGCTTTGAAGAGATGCAAGCACTTCGAGTTGGGTGGTGACAAGAAGCAGAAGGGCCAGGCCTTGCAGTTCTAA	#VALUE!	151	#VALUE!	#VALUE!	#VALUE!	#VALUE!	#VALUE!
yHMPu5000038392_candida_ecuadorensis_170713_g004985.m1	4236	ATGGTTAACGTTCCAAAGCTCAGAAAGACTTACTGTAAGGGTAAGCAGTGCAAGAAGCACACCCAACACAAGGTTACCCAATACAAGGCTGGTAAGGCTTCCTTGTTCGCTCAGGGTAAGAGAAGATACGACCGTAAGCAATCCGGTTTCGGTGGTCAGACCAAGCCAGTTTTCCACAAGAAGGCTAAGACTACCAAGAAGGTTGTCTTGAGATTGGAGTGTGTCAACTGCAAGACCAAGGCTCAGTTGGCTTTGAAGAGATGTAAGCACTTCGAGTTGGGTGGTGACAAGAAGCAAAAGGGTCAAGCTTTGCAATTTTAA	ATGGTTAACGTTCCAAAGCTCAGAAAGACTTACTGTAAGGGTAAGCAGTGCAAGAAGCACACCCAACACAAGGTTACCCAATACAAGGCTGGTAAGGCTTCCTTGTTCGCTCAGGGTAAGAGAAGATACGACCGTAAGCAATCCGGTTTCGGTGGTCAGACCAAGCCAGTTTTCCACAAGAAGGCTAAGACTACCAAGAAGGTTGTCTTGAGATTGGAGTGTGTCAACTGCAAGACCAAGGCTCAGTTGGCTTTGAAGAGATGTAAGCACTTCGAGTTGGGTGGTGACAAGAAGCAAAAGGGTCAAGCTTTGCAATTTTAA	#VALUE!	151	#VALUE!	#VALUE!	#VALUE!	#VALUE!	#VALUE!
yHMPu5000038332_metschnikowia_saccharicola_201018_g000184.m1	4236	ATGGTTAACGTTCCTAAGCTTAGAAAGACCTACTGTAAGGGAAAGGAATGCCGTAAGCACACCCAGCACAAGGTTACCCAATACAAGGCTGGTAAGGCTTCCTTGTTCGCTCAAGGTAAGAGAAGATACGACCGTAAGCAATCCGGTTTCGGTGGTCAAACTAAGCCAGTTTTCCACAAGAAGGCCAAGACCACCAAGAAGGTTGTTTTGAGATTGGAGTGTGTCAACTGTAAGACCAAGGCTCAGTTGGCTTTGAAGAGATGTAAGCACTTCGAGTTGGGTGGTGACAAGAAGCAAAAGGGTCAAGCTTTGCAATTCTAA	ATGGTTAACGTTCCTAAGCTTAGAAAGACCTACTGTAAGGGAAAGGAATGCCGTAAGCACACCCAGCACAAGGTTACCCAATACAAGGCTGGTAAGGCTTCCTTGTTCGCTCAAGGTAAGAGAAGATACGACCGTAAGCAATCCGGTTTCGGTGGTCAAACTAAGCCAGTTTTCCACAAGAAGGCCAAGACCACCAAGAAGGTTGTTTTGAGATTGGAGTGTGTCAACTGTAAGACCAAGGCTCAGTTGGCTTTGAAGAGATGTAAGCACTTCGAGTTGGGTGGTGACAAGAAGCAAAAGGGTCAAGCTTTGCAATTCTAA	151		151	GGTGGTCAAACTAAG	VALID	CCA	Proline
yHMPu5000038354_candida_succicola_170912_g001113.m1	4236	ATGGTTAACGTTCCTAAGCTTAGAAAGACCTACTGTAAGGGAAAGGAATGCCGTAAGCACACCCAGCACAAGGTTACCCAATACAAGGCTGGTAAGGCTTCCTTGTTCGCTCAAGGTAAGAGAAGGTACGACCGTAAGCAATCCGGTTTCGGTGGTCAAACTAAGCCAGTTTTCCACAAGAAGGCCAAGACCACCAAGAAGGTTGTCTTGAGATTGGAGTGTGTCAACTGTAAGACCAAGGCTCAGTTGGCTTTGAAGAGATGTAAGCACTTCGAGTTGGGTGGTGACAAGAAGCAAAAGGGTCAAGCTTTGCAATTCTAA	ATGGTTAACGTTCCTAAGCTTAGAAAGACCTACTGTAAGGGAAAGGAATGCCGTAAGCACACCCAGCACAAGGTTACCCAATACAAGGCTGGTAAGGCTTCCTTGTTCGCTCAAGGTAAGAGAAGGTACGACCGTAAGCAATCCGGTTTCGGTGGTCAAACTAAGCCAGTTTTCCACAAGAAGGCCAAGACCACCAAGAAGGTTGTCTTGAGATTGGAGTGTGTCAACTGTAAGACCAAGGCTCAGTTGGCTTTGAAGAGATGTAAGCACTTCGAGTTGGGTGGTGACAAGAAGCAAAAGGGTCAAGCTTTGCAATTCTAA	151		151	GGTGGTCAAACTAAG	VALID	CCA	Proline
yHMPu5000038359_candida_touchengensis_170713_g000407.m1	4236	ATGGTTAACGTTCCTAAGCTCAGAAAGACCTACTGCAAGGGAAAGGAATGCCGTAAGCACACCCAGCACAAGGTTACTCAGTACAAGGCTGGTAAGGCTTCCTTGTTTGCTCAGGGTAAGAGAAGATACGACCGTAAGCAGTCCGGTTTTGGTGGTCAAACCAAGCCAGTTTTCCACAAGAAGGCTAAGACCACCAAGAAGGTTGTGTTGAGATTGGAGTGTGTCAACTGTAAGACCAAGGCTCAGTTGGCTTTGAAGAGATGTAAGCACTTCGAGTTGGGTGGTGACAAGAAGCAAAAGGGTCAAGCTTTGCAATTCTAA	ATGGTTAACGTTCCTAAGCTCAGAAAGACCTACTGCAAGGGAAAGGAATGCCGTAAGCACACCCAGCACAAGGTTACTCAGTACAAGGCTGGTAAGGCTTCCTTGTTTGCTCAGGGTAAGAGAAGATACGACCGTAAGCAGTCCGGTTTTGGTGGTCAAACCAAGCCAGTTTTCCACAAGAAGGCTAAGACCACCAAGAAGGTTGTGTTGAGATTGGAGTGTGTCAACTGTAAGACCAAGGCTCAGTTGGCTTTGAAGAGATGTAAGCACTTCGAGTTGGGTGGTGACAAGAAGCAAAAGGGTCAAGCTTTGCAATTCTAA	151		151	GGTGGTCAAACCAAG	VALID	CCA	Proline
yHMPu5000038373_candida_nongkhaiensis_170713_g002893.m1	4236	ATGGTTAACGTTCCTAAGCTTAGAAAGACCTACTGTAAGGGAAAGGAGTGCCGTAAGCACACCCAACACAAGGTTACCCAATACAAGGCTGGTAAGGCTTCCTTGTTCGCTCAAGGTAAGAGAAGATACGACCGTAAACAATCCGGTTTCGGTGGTCAAACCAAGCCAGTTTTCCACAAGAAGGCTAAGACTACCAAGAAGGTCGTCTTGAGATTGGAGTGTGTTAACTGTAAGACCAAGGCTCAATTGGCTTTGAAGAGATGTAAGCACTTCGAGTTGGGTGGTGACAAGAAGCAAAAGGGTCAAGCTTTGCAATTCTAA	ATGGTTAACGTTCCTAAGCTTAGAAAGACCTACTGTAAGGGAAAGGAGTGCCGTAAGCACACCCAACACAAGGTTACCCAATACAAGGCTGGTAAGGCTTCCTTGTTCGCTCAAGGTAAGAGAAGATACGACCGTAAACAATCCGGTTTCGGTGGTCAAACCAAGCCAGTTTTCCACAAGAAGGCTAAGACTACCAAGAAGGTCGTCTTGAGATTGGAGTGTGTTAACTGTAAGACCAAGGCTCAATTGGCTTTGAAGAGATGTAAGCACTTCGAGTTGGGTGGTGACAAGAAGCAAAAGGGTCAAGCTTTGCAATTCTAA	151		151	GGTGGTCAAACCAAG	VALID	CCA	Proline
yHMPu5000038404_candida_bambusicola_190924_g001993.m1	4236	ATGGTTAACGTTCCTAAGCTCAGAAAGACCTACTGTAAGGGTAAGGAATGCCGTAAGCACACCCAGCACAAGGTTACTCAATACAAGGCTGGTAAAGCTTCCTTGTTCGCTCAGGGTAAGAGAAGATACGACCGTAAGCAGTCCGGTTTTGGTGGTCAAACCAAGCCAGTTTTCCACAAGAAGGCTAAGACCACCAAGAAGGTTGTGTTGAGATTGGAGTGTGTCAACTGTAAGACTAAGGCTCAGTTGGCTTTGAAGAGATGTAAGCACTTCGAGTTGGGTGGTGACAAGAAGCAAAAGGGTCAAGCTTTGCAATTCTAA	ATGGTTAACGTTCCTAAGCTCAGAAAGACCTACTGTAAGGGTAAGGAATGCCGTAAGCACACCCAGCACAAGGTTACTCAATACAAGGCTGGTAAAGCTTCCTTGTTCGCTCAGGGTAAGAGAAGATACGACCGTAAGCAGTCCGGTTTTGGTGGTCAAACCAAGCCAGTTTTCCACAAGAAGGCTAAGACCACCAAGAAGGTTGTGTTGAGATTGGAGTGTGTCAACTGTAAGACTAAGGCTCAGTTGGCTTTGAAGAGATGTAAGCACTTCGAGTTGGGTGGTGACAAGAAGCAAAAGGGTCAAGCTTTGCAATTCTAA	151		151	GGTGGTCAAACCAAG	VALID	CCA	Proline
yHMPu5000040925_candida_robnettiae_201018_g000650.m1	4236	ATGGTTAACGTTCCTAAGCTCAGAAAGACCTACTGTAAGGGTAAGGAGTGCCGTAAGCACACCCAACACAAGGTTACTCAATACAAGGCTGGTAAGGCTTCCTTGTTCGCTCAGGGTAAGAGAAGATACGACCGTAAACAGTCCGGTTTCGGTGGTCAAACCAAGCCAGTTTTCCACAAGAAGGCTAAGACTACCAAGAAGGTTGTTTTGAGATTGGAGTGTGTCAACTGTAAGACTAAGGCTCAATTGTCTTTGAAGAGATGTAAGCACTTCGAGTTGGGTGGTGACAAGAAGCAAAAGGGTCAAGCTTTACAATTCTAA	ATGGTTAACGTTCCTAAGCTCAGAAAGACCTACTGTAAGGGTAAGGAGTGCCGTAAGCACACCCAACACAAGGTTACTCAATACAAGGCTGGTAAGGCTTCCTTGTTCGCTCAGGGTAAGAGAAGATACGACCGTAAACAGTCCGGTTTCGGTGGTCAAACCAAGCCAGTTTTCCACAAGAAGGCTAAGACTACCAAGAAGGTTGTTTTGAGATTGGAGTGTGTCAACTGTAAGACTAAGGCTCAATTGTCTTTGAAGAGATGTAAGCACTTCGAGTTGGGTGGTGACAAGAAGCAAAAGGGTCAAGCTTTACAATTCTAA	151		151	GGTGGTCAAACCAAG	VALID	CCA	Proline
yHMPu5000041842_candida_saopaulonensis_190924_g004874.m1	4236	ATGGTCAACGTTCCTAAGCTCAGAAAAACCTACTGCAAGGGAAAGGAATGCCGTAAGCACACCCAGCACAAGGTCACTCAATACAAGGCTGGTAAGGCTTCCTTGTTCGCTCAGGGTAAGAGAAGATACGACCGTAAGCAGTCCGGTTTTGGTGGTCAAACCAAGCCAGTTTTCCACAAGAAGGCTAAGACCACCAAGAAGGTTGTCTTGAGATTGGAGTGTGTCAACTGTAAGACCAAGGCTCAATTGTCCTTGAAGAGATGTAAGCACTTCGAGTTGGGTGGTGACAAGAAGCAAAAGGGTCAAGCTTTGCAATTCTAA	ATGGTCAACGTTCCTAAGCTCAGAAAAACCTACTGCAAGGGAAAGGAATGCCGTAAGCACACCCAGCACAAGGTCACTCAATACAAGGCTGGTAAGGCTTCCTTGTTCGCTCAGGGTAAGAGAAGATACGACCGTAAGCAGTCCGGTTTTGGTGGTCAAACCAAGCCAGTTTTCCACAAGAAGGCTAAGACCACCAAGAAGGTTGTCTTGAGATTGGAGTGTGTCAACTGTAAGACCAAGGCTCAATTGTCCTTGAAGAGATGTAAGCACTTCGAGTTGGGTGGTGACAAGAAGCAAAAGGGTCAAGCTTTGCAATTCTAA	151		151	GGTGGTCAAACCAAG	VALID	CCA	Proline
yHMPu5000041846_candida_picinguabensis_170307_g000409.m1	4236	ATGGTCAACGTTCCTAAGCTCAGAAAAACCTACTGCAAGGGAAAGGAATGCCGTAAGCACACCCAGCACAAGGTCACTCAATACAAGGCTGGTAAGGCTTCCTTGTTCGCCCAGGGTAAGAGAAGATACGACCGTAAGCAGTCCGGTTTTGGTGGTCAAACCAAGCCAGTTTTCCACAAGAAGGCTAAGACCACCAAGAAGGTTGTCTTGAGATTGGAGTGTGTCAACTGTAAGACCAAGGCTCAATTGTCCTTGAAGAGATGTAAGCACTTCGAGTTGGGTGGTGACAAGAAGCAAAAGGGTCAAGCTTTGCAATTCTAA	ATGGTCAACGTTCCTAAGCTCAGAAAAACCTACTGCAAGGGAAAGGAATGCCGTAAGCACACCCAGCACAAGGTCACTCAATACAAGGCTGGTAAGGCTTCCTTGTTCGCCCAGGGTAAGAGAAGATACGACCGTAAGCAGTCCGGTTTTGGTGGTCAAACCAAGCCAGTTTTCCACAAGAAGGCTAAGACCACCAAGAAGGTTGTCTTGAGATTGGAGTGTGTCAACTGTAAGACCAAGGCTCAATTGTCCTTGAAGAGATGTAAGCACTTCGAGTTGGGTGGTGACAAGAAGCAAAAGGGTCAAGCTTTGCAATTCTAA	151		151	GGTGGTCAAACCAAG	VALID	CCA	Proline
yHMPu5000041813_metschnikowia_lunata_180604_g002875.m1	4236	ATGGTTAACGTTCCAAAGCTTAGAAGAACCTTCTGTAAGGGCAAGGAGTGCCGCAAGCACACGCAACACAAGGTGACCCAATACAAGGCTGGTAAGGCTTCGTTGTTCGCCCAAGGTAAGAGAAGATACGACCGCAAGCAATCCGGTTACGGTGGTCAGACCAAGCCAGTCTTCCACAAAAAGGCCAAGACTACCAAGAAGGTTGTCTTGAGATTGGAGTGTGTCAACTGTAAGACCAAGGCCCAATTGGCTTTGAAGAGATGCAAGCACTTCGAGTTGGGTGGTGACAAGAAGCAAAAGGGCCAAGCTTTGCAATTTTAA	ATGGTTAACGTTCCAAAGCTTAGAAGAACCTTCTGTAAGGGCAAGGAGTGCCGCAAGCACACGCAACACAAGGTGACCCAATACAAGGCTGGTAAGGCTTCGTTGTTCGCCCAAGGTAAGAGAAGATACGACCGCAAGCAATCCGGTTACGGTGGTCAGACCAAGCCAGTCTTCCACAAAAAGGCCAAGACTACCAAGAAGGTTGTCTTGAGATTGGAGTGTGTCAACTGTAAGACCAAGGCCCAATTGGCTTTGAAGAGATGCAAGCACTTCGAGTTGGGTGGTGACAAGAAGCAAAAGGGCCAAGCTTTGCAATTTTAA	#VALUE!	151	#VALUE!	#VALUE!	#VALUE!	#VALUE!	#VALUE!
yHMPu5000041862_candida_golubevii_170307_g003694.m1	4236	ATGGTTAACGTTCCAAAGCTTAGAAAGACCTTCTGTAAGGGCAAGGAGTGCCGCAAGCACACGCAGCACAAGGTGACCCAATACAAGGCTGGTAAGGCTTCGTTGTTCGCTCAAGGTAAGAGAAGATACGACCGTAAGCAATCCGGTTACGGTGGTCAGACCAAGCCAGTTTTCCACAAAAAGGCCAAGACCACCAAGAAGGTTGTCTTGAGATTGGAGTGTGTCAACTGTAAGACCAAGGCCCAATTGGCTTTGAAGAGATGCAAGCACTTCGAGTTGGGTGGTGACAAGAAGCAAAAGGGTCAAGCTTTGCAATTTTAA	ATGGTTAACGTTCCAAAGCTTAGAAAGACCTTCTGTAAGGGCAAGGAGTGCCGCAAGCACACGCAGCACAAGGTGACCCAATACAAGGCTGGTAAGGCTTCGTTGTTCGCTCAAGGTAAGAGAAGATACGACCGTAAGCAATCCGGTTACGGTGGTCAGACCAAGCCAGTTTTCCACAAAAAGGCCAAGACCACCAAGAAGGTTGTCTTGAGATTGGAGTGTGTCAACTGTAAGACCAAGGCCCAATTGGCTTTGAAGAGATGCAAGCACTTCGAGTTGGGTGGTGACAAGAAGCAAAAGGGTCAAGCTTTGCAATTTTAA	#VALUE!	151	#VALUE!	#VALUE!	#VALUE!	#VALUE!	#VALUE!
yHMJ9_Metschnikowia_sp_nov_plate34_DISCOVAR_g000300.m1	4236	ATGGTTAACGTTCCAAAGCTCAGAAAGACCTACTGCAAGGGCAAGCAATGCCGCAAGCACACTCAGCACAAGGTCACCCAATACAAGGCTGGTAAGGCCTCCTTGTTCGCCCAGGGTAAGAGAAGATACGACCGTAAGCAGTCCGGTTTCGGTGGTCAAACCAAGCCAGTTTTCCACAAGAAGGCCAAGACCACCAAGAAGGTTGTCTTGAGATTGGAGTGTGTCAACTGTAAGACCAAGGCTCAATTGTGCTTGAAGAGATGCAAGCACTTCGAGTTGGGTGGTGACAAGAAACAAAAGGGTCAAGCTTTGCAATTCTAA	ATGGTTAACGTTCCAAAGCTCAGAAAGACCTACTGCAAGGGCAAGCAATGCCGCAAGCACACTCAGCACAAGGTCACCCAATACAAGGCTGGTAAGGCCTCCTTGTTCGCCCAGGGTAAGAGAAGATACGACCGTAAGCAGTCCGGTTTCGGTGGTCAAACCAAGCCAGTTTTCCACAAGAAGGCCAAGACCACCAAGAAGGTTGTCTTGAGATTGGAGTGTGTCAACTGTAAGACCAAGGCTCAATTGTGCTTGAAGAGATGCAAGCACTTCGAGTTGGGTGGTGACAAGAAACAAAAGGGTCAAGCTTTGCAATTCTAA	151		151	GGTGGTCAAACCAAG	VALID	CCA	Proline
metschnikowia_drakensbergensis_g002332.m1	4236	ATGGTTAACGTTCCAAAGCTTAGAAGGACTTACTGTAAAGGTAAGCAGTGTCGTAAGCACACTCAACACAAGGTCACCCAATACAAGGCCGGTAAAGCCTCTTTGTTCGCTCAGGGTAAGAGAAGATACGACCGTAAACAATCCGGTTTCGGTGGTCAAACCAAGCCAGTTTTCCACAAGAAGGCCAAGACTACCAAGAAGGTTGTCTTGAGATTGGAGTGTGTTACTTGCAAGACCAAGGCGCAATTGTCCTTGAAGAGATGTAAGCACTTCGAGTTGGGTGGAGACAAGAAGCAAAAGGGTCAAGCCTTGCAATTCTAA	ATGGTTAACGTTCCAAAGCTTAGAAGGACTTACTGTAAAGGTAAGCAGTGTCGTAAGCACACTCAACACAAGGTCACCCAATACAAGGCCGGTAAAGCCTCTTTGTTCGCTCAGGGTAAGAGAAGATACGACCGTAAACAATCCGGTTTCGGTGGTCAAACCAAGCCAGTTTTCCACAAGAAGGCCAAGACTACCAAGAAGGTTGTCTTGAGATTGGAGTGTGTTACTTGCAAGACCAAGGCGCAATTGTCCTTGAAGAGATGTAAGCACTTCGAGTTGGGTGGAGACAAGAAGCAAAAGGGTCAAGCCTTGCAATTCTAA	151		151	GGTGGTCAAACCAAG	VALID	CCA	Proline
yHMPu5000040937_metschnikowia_proteae_201018_g000605.m1	4236	ATGGTTAACGTTCCAAAGCTTAGAAGGACTTACTGCAAAGGTAAGCAGTGTCGTAAGCACACTCAACACAAGGTCACCCAATACAAGGCCGGTAAAGCCTCTTTGTTCGCTCAGGGTAAGAGAAGATACGACCGTAAACAATCCGGTTTCGGTGGTCAAACCAAGCCAGTTTTCCACAAGAAGGCCAAGACTACCAAGAAGGTTGTCTTGAGATTGGAGTGTGTTACTTGCAAGACCAAGGCGCAATTGTCCTTGAAGAGATGTAAGCACTTCGAGTTGGGTGGAGACAAGAAGCAAAAAGGTCAAGCCTTGCAATTCTAA	ATGGTTAACGTTCCAAAGCTTAGAAGGACTTACTGCAAAGGTAAGCAGTGTCGTAAGCACACTCAACACAAGGTCACCCAATACAAGGCCGGTAAAGCCTCTTTGTTCGCTCAGGGTAAGAGAAGATACGACCGTAAACAATCCGGTTTCGGTGGTCAAACCAAGCCAGTTTTCCACAAGAAGGCCAAGACTACCAAGAAGGTTGTCTTGAGATTGGAGTGTGTTACTTGCAAGACCAAGGCGCAATTGTCCTTGAAGAGATGTAAGCACTTCGAGTTGGGTGGAGACAAGAAGCAAAAAGGTCAAGCCTTGCAATTCTAA	151		151	GGTGGTCAAACCAAG	VALID	CCA	Proline
yHMPu5000041840_candida_wancherniae_160928_g004698.m1	4236	ATGGTTAACGTTCCAAAGCTCAGAAAGACCTACTGCAAGGGCAAGCAATGCCGCAAGCACACTCAACACAAGGTCACTCAATACAAGGCTGGTAAGGCTTCTTTGTTTGCCCAGGGTAAGAGAAGATACGACCGTAAGCAATCCGGTTACGGTGGTCAAACCAAGCCAGTTTTCCACAAGAAGGCCAAGACTACCAAGAAGGTTGTCTTGAGATTGGAATGTGTTACCTGTAAGACCAAGGCTCAGTTGTCTTTGAAGAGATGTAAGCACTTCGAGTTGGGTGGTGACAAGAAGCAAAAGGGTCAAGCTTTGCAATTTTAA	ATGGTTAACGTTCCAAAGCTCAGAAAGACCTACTGCAAGGGCAAGCAATGCCGCAAGCACACTCAACACAAGGTCACTCAATACAAGGCTGGTAAGGCTTCTTTGTTTGCCCAGGGTAAGAGAAGATACGACCGTAAGCAATCCGGTTACGGTGGTCAAACCAAGCCAGTTTTCCACAAGAAGGCCAAGACTACCAAGAAGGTTGTCTTGAGATTGGAATGTGTTACCTGTAAGACCAAGGCTCAGTTGTCTTTGAAGAGATGTAAGCACTTCGAGTTGGGTGGTGACAAGAAGCAAAAGGGTCAAGCTTTGCAATTTTAA	151		151	GGTGGTCAAACCAAG	VALID	CCA	Proline
yHMPu5000035334_clavispora_opuntiae_190924_g004936.m1	4236	ATGGTTAACGTTCCAAAGCTTAGAAAGACTTTCTGTAAGGGTAAGCAATGCAGAAAGCACACCCAACACAAGGTTACCCAATACAAGGCTGGTAAGGCTTCCTTGTTCGCCCAAGGTAAGAGAAGATATGACCGTAAGCAATCCGGTTTCGGTGGTCAAACCAAGCCAGTTTTCCACAAGAAGGCTAAGACTACCAAGAAGGTTGTCTTGAGATTGGAATGTGTTGCCTGCAAGACCAAGGCTCAATTGACCTTGAAGAGATGTAAGCACTTCGAGTTGGGTGGAGACAAGAAGCAAAAGGGTCAAGCTTTGCAATTTTAA	ATGGTTAACGTTCCAAAGCTTAGAAAGACTTTCTGTAAGGGTAAGCAATGCAGAAAGCACACCCAACACAAGGTTACCCAATACAAGGCTGGTAAGGCTTCCTTGTTCGCCCAAGGTAAGAGAAGATATGACCGTAAGCAATCCGGTTTCGGTGGTCAAACCAAGCCAGTTTTCCACAAGAAGGCTAAGACTACCAAGAAGGTTGTCTTGAGATTGGAATGTGTTGCCTGCAAGACCAAGGCTCAATTGACCTTGAAGAGATGTAAGCACTTCGAGTTGGGTGGAGACAAGAAGCAAAAGGGTCAAGCTTTGCAATTTTAA	151		151	GGTGGTCAAACCAAG	VALID	CCA	Proline
yHMPu5000038395_candida_danieliae_170713_g000307.m1	4236	ATGGTTAACGTTCCAAAGGTTAGAAAGACTTTCTGTAAGGGTAAGCAGTGCCGTAAGCACACCCAGCACAAGGTCACCCAATACAAGGCTGGTAAGGCTTCCTTGTTCGCTCAGGGTAAGAGAAGATACGACCGTAAGCAATCCGGTTACGGTGGTCAAACTAAGCCAGTTTTCCACAAGAAGGCTAAGACTACCAAGAAGGTTGTCTTGAGATTGGAGTGTGTCGCTTGCAAGACCAAGGCTCAGTTGTCCTTGAAGAGATGTAAGCACTTCGAGTTGGGTGGTGACAAGAAGCAAAAGGGTCAAGCCTTGCAATTTTAA	ATGGTTAACGTTCCAAAGGTTAGAAAGACTTTCTGTAAGGGTAAGCAGTGCCGTAAGCACACCCAGCACAAGGTCACCCAATACAAGGCTGGTAAGGCTTCCTTGTTCGCTCAGGGTAAGAGAAGATACGACCGTAAGCAATCCGGTTACGGTGGTCAAACTAAGCCAGTTTTCCACAAGAAGGCTAAGACTACCAAGAAGGTTGTCTTGAGATTGGAGTGTGTCGCTTGCAAGACCAAGGCTCAGTTGTCCTTGAAGAGATGTAAGCACTTCGAGTTGGGTGGTGACAAGAAGCAAAAGGGTCAAGCCTTGCAATTTTAA	151		151	GGTGGTCAAACTAAG	VALID	CCA	Proline
yHMPu5000038331_metschnikowia_lopburiensis_170713_g004241.m1	4236	ATGGTTAACGTTCCAAAGCTCAGAAAGACCTACTGTAAGGGCAAGGCCTGCAAGAAGCACACCCAACACAAGGTGACCCAATACAAGGCTGGTAAGGCTTCTTTGTTCGCCCAGGGTAAGAGAAGATACGACCGTAAGCAATCCGGTTACGGTGGTCAAACCAAGCCCGTTTTCCACAAGAAGGCCAAGACTACCAAGAAGGTTGTTTTGAGATTGGAATGTGTCGTCTGCAAGACCAAGGCTCAGCTCTCTTTGAAGAGATGTAAGCACTTCGAGTTGGGTGGTGACAAGAAGCAAAAGGGTCAAGCTTTGCAATTCTAA	ATGGTTAACGTTCCAAAGCTCAGAAAGACCTACTGTAAGGGCAAGGCCTGCAAGAAGCACACCCAACACAAGGTGACCCAATACAAGGCTGGTAAGGCTTCTTTGTTCGCCCAGGGTAAGAGAAGATACGACCGTAAGCAATCCGGTTACGGTGGTCAAACCAAGCCCGTTTTCCACAAGAAGGCCAAGACTACCAAGAAGGTTGTTTTGAGATTGGAATGTGTCGTCTGCAAGACCAAGGCTCAGCTCTCTTTGAAGAGATGTAAGCACTTCGAGTTGGGTGGTGACAAGAAGCAAAAGGGTCAAGCTTTGCAATTCTAA	151		151	GGTGGTCAAACCAAG	VALID	CCC	Proline
yHMPu5000041864_candida_hainanensis_170713_g004674.m1	4236	ATGGTTAACGTTCCAAAGCTCAGAAAGACCTACTGTAAGGGCAAGGCCTGCAAGAAGCACACCCAACACAAGGTGACCCAATACAAGGCTGGTAAGGCTTCTTTGTTCGCCCAGGGTAAGAGAAGATACGACCGTAAGCAATCCGGTTACGGTGGTCAAACCAAGCCCGTTTTCCACAAGAAGGCCAAGACTACCAAGAAGGTTGTTTTGAGATTGGAATGTGTCGTCTGCAAGACCAAGGCTCAGCTCTCTTTGAAGAGATGTAAGCACTTCGAGTTGGGTGGTGACAAGAAGCAAAAGGGTCAAGCTTTGCAATTCTAA	ATGGTTAACGTTCCAAAGCTCAGAAAGACCTACTGTAAGGGCAAGGCCTGCAAGAAGCACACCCAACACAAGGTGACCCAATACAAGGCTGGTAAGGCTTCTTTGTTCGCCCAGGGTAAGAGAAGATACGACCGTAAGCAATCCGGTTACGGTGGTCAAACCAAGCCCGTTTTCCACAAGAAGGCCAAGACTACCAAGAAGGTTGTTTTGAGATTGGAATGTGTCGTCTGCAAGACCAAGGCTCAGCTCTCTTTGAAGAGATGTAAGCACTTCGAGTTGGGTGGTGACAAGAAGCAAAAGGGTCAAGCTTTGCAATTCTAA	151		151	GGTGGTCAAACCAAG	VALID	CCC	Proline
yHMPu5000041808_metschnikowia_caudata_170307_g004172.m1	4236	ATGGTTAACGTTCCAAAGCTCAGAAAGACCTACTGTAAGGGAAAGGCTTGCAGAAAGCACACCCAACACAAGGTTACCCAATACAAGGCTGGTAAGGCTTCCTTGTTCGCCCAGGGTAAGAGAAGATACGACCGTAAGCAGTCCGGTTACGGTGGTCAGACCAAGCCCGTTTTCCACAAGAAGGCCAAGACCACCAAGAAGGTTGTTTTGAGATTGGAATGTGTCGTCTGCAAGACCAAGGCCCAGCTCTCCTTGAAGAGATGTAAGCACTTCGAGTTGGGTGGTGACAAGAAGCAAAAGGGTCAAGCTTTGCAGTTTTAA	ATGGTTAACGTTCCAAAGCTCAGAAAGACCTACTGTAAGGGAAAGGCTTGCAGAAAGCACACCCAACACAAGGTTACCCAATACAAGGCTGGTAAGGCTTCCTTGTTCGCCCAGGGTAAGAGAAGATACGACCGTAAGCAGTCCGGTTACGGTGGTCAGACCAAGCCCGTTTTCCACAAGAAGGCCAAGACCACCAAGAAGGTTGTTTTGAGATTGGAATGTGTCGTCTGCAAGACCAAGGCCCAGCTCTCCTTGAAGAGATGTAAGCACTTCGAGTTGGGTGGTGACAAGAAGCAAAAGGGTCAAGCTTTGCAGTTTTAA	#VALUE!	151	#VALUE!	#VALUE!	#VALUE!	#VALUE!	#VALUE!
yHMPu5000040935_metschnikowia_shivogae_201018_g004146.m1	4236	ATGGTTAACGTTCCAAAGCTCAGAAAGACTTACTGTAAAGGTAAGACTTGCCGCAAGCACACCCAACACAAGGTGACCCAATACAAGGCCGGTAAGGCTTCCTTGTTCGCTCAGGGTAAGAGAAGATACGACCGTAAGCAATCCGGTTACGGTGGTCAAACCAAGCCAGTTTTCCACAAGAAGGCCAAGACCACCAAGAAGGTTGTGTTGAGATTGGAGTGTGTTGCTTGCAAGACCAAGGCTCAATTGTCCTTGAAGAGATGTAAGCACTTCGAGTTGGGTGGTGACAAGAAGCAAAAGGGCCAAGCCTTGCAATTCTAG	ATGGTTAACGTTCCAAAGCTCAGAAAGACTTACTGTAAAGGTAAGACTTGCCGCAAGCACACCCAACACAAGGTGACCCAATACAAGGCCGGTAAGGCTTCCTTGTTCGCTCAGGGTAAGAGAAGATACGACCGTAAGCAATCCGGTTACGGTGGTCAAACCAAGCCAGTTTTCCACAAGAAGGCCAAGACCACCAAGAAGGTTGTGTTGAGATTGGAGTGTGTTGCTTGCAAGACCAAGGCTCAATTGTCCTTGAAGAGATGTAAGCACTTCGAGTTGGGTGGTGACAAGAAGCAAAAGGGCCAAGCCTTGCAATTCTAG	151		151	GGTGGTCAAACCAAG	VALID	CCA	Proline
yHMPu5000040959_metschnikowia_aberdeeniae_201018_g001574.m1	4236	ATGGTTAACGTTCCAAAGCTCAGAAAGACTTACTGTAAAGGTAAGACTTGCCGCAAGCACACCCAACACAAGGTGACCCAATACAAGGCCGGTAAGGCTTCCTTGTTCGCTCAGGGTAAGAGAAGATACGACCGTAAGCAATCCGGTTACGGTGGTCAAACCAAGCCAGTTTTCCACAAGAAGGCCAAGACCACCAAGAAGGTTGTGTTGAGATTGGAGTGTGTTGCTTGCAAGACCAAGGCTCAATTGTCCTTGAAGAGATGTAAGCACTTCGAGTTGGGTGGTGACAAGAAGCAAAAGGGCCAAGCCTTGCAATTCTAG	ATGGTTAACGTTCCAAAGCTCAGAAAGACTTACTGTAAAGGTAAGACTTGCCGCAAGCACACCCAACACAAGGTGACCCAATACAAGGCCGGTAAGGCTTCCTTGTTCGCTCAGGGTAAGAGAAGATACGACCGTAAGCAATCCGGTTACGGTGGTCAAACCAAGCCAGTTTTCCACAAGAAGGCCAAGACCACCAAGAAGGTTGTGTTGAGATTGGAGTGTGTTGCTTGCAAGACCAAGGCTCAATTGTCCTTGAAGAGATGTAAGCACTTCGAGTTGGGTGGTGACAAGAAGCAAAAGGGCCAAGCCTTGCAATTCTAG	151		151	GGTGGTCAAACCAAG	VALID	CCA	Proline
yHMPu5000040950_metschnikowia_hibisci_200128_g002708.m1	4236	ATGGTTAACGTTCCAAAGCTCAGAAAGACTTACTGTAAAGGTAAGGCTTGCCGCAAGCACACTCAACACAAGGTGACTCAATACAAGGCCGGTAAGGCTTCCTTGTTTGCTCAGGGTAAGAGAAGATATGACCGTAAGCAATCCGGTTATGGTGGTCAAACCAAGCCAGTTTTCCACAAAAAGGCCAAGACTACCAAGAAGGTTGTGTTGAGATTGGAGTGTGTTGCTTGCAAGACCAAGGCTCAATTGTCCTTGAAGAGATGTAAGCACTTCGAGTTGGGTGGTGACAAGAAGCAAAAGGGCCAAGCCTTGCAATTCTAG	ATGGTTAACGTTCCAAAGCTCAGAAAGACTTACTGTAAAGGTAAGGCTTGCCGCAAGCACACTCAACACAAGGTGACTCAATACAAGGCCGGTAAGGCTTCCTTGTTTGCTCAGGGTAAGAGAAGATATGACCGTAAGCAATCCGGTTATGGTGGTCAAACCAAGCCAGTTTTCCACAAAAAGGCCAAGACTACCAAGAAGGTTGTGTTGAGATTGGAGTGTGTTGCTTGCAAGACCAAGGCTCAATTGTCCTTGAAGAGATGTAAGCACTTCGAGTTGGGTGGTGACAAGAAGCAAAAGGGCCAAGCCTTGCAATTCTAG	151		151	GGTGGTCAAACCAAG	VALID	CCA	Proline
yHMPu5000034986_candida_oregonensis_160519_g004481.m1	4236	ATGGTTAACGTTCCTAAGCTCAGAAAGACCTACTGTAAGGGAAAGGAGTGCCGCAAGCACACCCAGCACAAGGTGACCCAATACAAGGCTGGTAAGGCTTCTTTGTTCGCCCAGGGTAAGAGAAGATACGACCGTAAACAGAAGGGTTTCGGAGGTCAGACCAAGCCAGTTTTCCACAAGAAGGCCAAGACCACCAAGAAGGTTGTGTTGAGATTGGAGTGTGTTGCCTGCAAGACCAAGGCTCAGCTCTCGTTGAAGAGATGTAAGCACTTCGAGTTGGGTGGAGACAAGAAGCAGAAGGGTCAAGCTTTGCAGTTTTAA	ATGGTTAACGTTCCTAAGCTCAGAAAGACCTACTGTAAGGGAAAGGAGTGCCGCAAGCACACCCAGCACAAGGTGACCCAATACAAGGCTGGTAAGGCTTCTTTGTTCGCCCAGGGTAAGAGAAGATACGACCGTAAACAGAAGGGTTTCGGAGGTCAGACCAAGCCAGTTTTCCACAAGAAGGCCAAGACCACCAAGAAGGTTGTGTTGAGATTGGAGTGTGTTGCCTGCAAGACCAAGGCTCAGCTCTCGTTGAAGAGATGTAAGCACTTCGAGTTGGGTGGAGACAAGAAGCAGAAGGGTCAAGCTTTGCAGTTTTAA	#VALUE!	151	#VALUE!	#VALUE!	#VALUE!	#VALUE!	#VALUE!
yHMPu5000038330_metschnikowia_laotica_170713_g004326.m1	4236	ATGATCAGACAGGATTCGAACTTTGTGCAAGCAATTTTCGCAATCAAGGCGAAAACAACTAAGTCGTTCTTTGAGTCAACCATTTGCCCATTACAAGTCACATCACAAATCCTCTCGGTGGCCAAGCTGGCTAAGGCGCGAGACTGTAATGGAATTGTAATCTTGAGATCGGGTGTTCGACTCACCCCCGGGAGATTTGCTGCCTTTATGGCCAAGTTGGTAAGGCACCTCACTATTAACGTTCCAAAGCTCAGAAAGACTTTCTGTAAGGGTAAGCAATGCCGCAAGCACACTCAACACAAGGTTACCCAATACAAGGCTGGTAAGGCTTCCTTGTTCGCTCAAGGTAAGAGAAGATACGACCGTAAGCAATCCGGTTTCGGTGGTCAAACCAAGCCA…	ATGATCAGACAGGATTCGAACTTTGTGCAAGCAATTTTCGCAATCAAGGCGAAAACAACTAAGTCGTTCTTTGAGTCAACCATTTGCCCATTACAAGTCACATCACAAATCCTCTCGGTGGCCAAGCTGGCTAAGGCGCGAGACTGTAATGGAATTGTAATCTTGAGATCGGGTGTTCGACTCACCCCCGGGAGATTTGCTGCCTTTATGGCCAAGTTGGTAAGGCACCTCACTATTAACGTTCCAAAGCTCAGAAAGACTTTCTGTAAGGGTAAGCAATGCCGCAAGCACACTCAACACAAGGTTACCCAATACAAGGCTGGTAAGGCTTCCTTGTTCGCTCAAGGTAAGAGAAGATACGACCGTAAGCAATCCGGTTTCGGTGGTCAAACCAAGCCA…	382		382	GGTGGTCAAACCAAG	VALID	CCA	Proline
yHKB443_Metschnikowia_sp_nov_plate33_SPADES_g002836.m1	4236	ATGCTTCGGAAGGACAGCGAGGAGAGTCTCAGCACGCTTCTCACAGCATCGACCGCCCCCGAAAATGACGACTCCGCCCTGCTCTTCTCCGACGAAACCTTGACCCACGCCTCAGACCCAGTCTTCCGCCAAAAGCTCTCGTCCTACACCCGCCTCCGAGAGCTCCCGCTTGTCACGTGCACGCTCCGGGCAGAGCTCCTTCTCTATGGCTCCCCCAAAGCGTTGGCCGACGAGGCGCCGCCGCTCTTCTCCATCCAGCCCAACAAGCTCCACTTCCTCAAGAAGCTGGCCCCACTCCTCACCATCTACCGCCACACGGCCACCGGCAAAACCGACTTCTGCAAAACGTACTTCAAGATCTTGTCCAACAACTTGACCTGCTACGTGTTGATGTTTGCC…	ATGCTTCGGAAGGACAGCGAGGAGAGTCTCAGCACGCTTCTCACAGCATCGACCGCCCCCGAAAATGACGACTCCGCCCTGCTCTTCTCCGACGAAACCTTGACCCACGCCTCAGACCCAGTCTTCCGCCAAAAGCTCTCGTCCTACACCCGCCTCCGAGAGCTCCCGCTTGTCACGTGCACGCTCCGGGCAGAGCTCCTTCTCTATGGCTCCCCCAAAGCGTTGGCCGACGAGGCGCCGCCGCTCTTCTCCATCCAGCCCAACAAGCTCCACTTCCTCAAGAAGCTGGCCCCACTCCTCACCATCTACCGCCACACGGCCACCGGCAAAACCGACTTCTGCAAAACGTACTTCAAGATCTTGTCCAACAACTTGACCTGCTACGTGTTGATGTTTGCC…	#VALUE!	1108	#VALUE!	#VALUE!	#VALUE!	#VALUE!	#VALUE!
yHMPu5000035721_candida_asparagi_160519_g000898.m1	4236	ATGTTAAGACCAAGCTTTCTTAACGTTCCAAAGCTCAGAAAGACCTACTGTAAGGGTAAGCAATGCAGAAAGCACACCCAACACAAGGTTACCCAATACAAGGCTGGTAAGGCTTCTTTGTTCGCTCAAGGTAAGAGAAGATACGACCGTAAGCAATCCGGTTTCGGTGGTCAAACCAAGCCAGTTTTCCACAAGAAGGCTAAGACTACCAAGAAGGTTGTGTTGAGATTGGAATGTGTCGCCTGTAAGACTAAGGCTCAGTTGGCTTTGAAGAGATGTAAGCACTTCGAGTTGGGTGGTGACAAGAAGCAAAAGGGTCAAGCTTTGCAATTTTAA	ATGTTAAGACCAAGCTTTCTTAACGTTCCAAAGCTCAGAAAGACCTACTGTAAGGGTAAGCAATGCAGAAAGCACACCCAACACAAGGTTACCCAATACAAGGCTGGTAAGGCTTCTTTGTTCGCTCAAGGTAAGAGAAGATACGACCGTAAGCAATCCGGTTTCGGTGGTCAAACCAAGCCAGTTTTCCACAAGAAGGCTAAGACTACCAAGAAGGTTGTGTTGAGATTGGAATGTGTCGCCTGTAAGACTAAGGCTCAGTTGGCTTTGAAGAGATGTAAGCACTTCGAGTTGGGTGGTGACAAGAAGCAAAAGGGTCAAGCTTTGCAATTTTAA	166		166	GGTGGTCAAACCAAG	VALID	CCA	Proline
yHMPu5000038066_clavispora_reshetovae_170912_g007685.m1	4236	ATGACCACAATCGCAAAACCCTTGACCACACCGAAACACATTAACGTTCCAAAGCTCAGAAAGACTTACTGTAAGGGTAAGGACTGCCGCAAGCACACCCAGCACAAGGTCACCCAGTACAAGGCTGGTAAAGCTTCTTTGTTCGCCCAGGGTAAGAGAAGATACGACCGTAAACAGAAGGGTTTCGGTGGTCAGACCAAGCCAGTTTTCCACAAGAAGGCCAAGACCACCAAGAAGGTTGTGTTGAGATTGGAGTGTGTCACTTGCAAGACCAAGGCTCAGCTCTCTTTGAAGAGATGTAAGCACTTCGAGTTGGGTGGTGACAAGAAGCAAAAGGGTCAAGCTTTGCAATTTTAA	ATGACCACAATCGCAAAACCCTTGACCACACCGAAACACATTAACGTTCCAAAGCTCAGAAAGACTTACTGTAAGGGTAAGGACTGCCGCAAGCACACCCAGCACAAGGTCACCCAGTACAAGGCTGGTAAAGCTTCTTTGTTCGCCCAGGGTAAGAGAAGATACGACCGTAAACAGAAGGGTTTCGGTGGTCAGACCAAGCCAGTTTTCCACAAGAAGGCCAAGACCACCAAGAAGGTTGTGTTGAGATTGGAGTGTGTCACTTGCAAGACCAAGGCTCAGCTCTCTTTGAAGAGATGTAAGCACTTCGAGTTGGGTGGTGACAAGAAGCAAAAGGGTCAAGCTTTGCAATTTTAA	#VALUE!	187	#VALUE!	#VALUE!	#VALUE!	#VALUE!	#VALUE!
yHMPu5000035335_candida_blattae_160928_g005795.m1	4236	ATGGTTAACGTTCCAAAGCTCAGAAAGACTTACTGTAAGGGTAAGCTGTGCAAGAAGCACACCCAACACAAGGTTACCCAATACAAGGCTGGTAAGGCTTCCTTGTTCGCCCAGGGTAAGAGAAGATACGACCGTAAGCAGTCTGGTTTCGGTGGTCAGACCAAGCCAGTTTTCCACAAGAAGGCCAAGACCACCAAGAAGGTCGTTTTGAGATTGGAGTGTGTCAACTGCAAGACCAAGGCTCAGTTGGCTTTGAAGAGATGTAAGCACTTCGAGTTGGGTGGTGACAAGAAGCAAAAGGGTCAAGCTTTGCAGTTTTAA	ATGGTTAACGTTCCAAAGCTCAGAAAGACTTACTGTAAGGGTAAGCTGTGCAAGAAGCACACCCAACACAAGGTTACCCAATACAAGGCTGGTAAGGCTTCCTTGTTCGCCCAGGGTAAGAGAAGATACGACCGTAAGCAGTCTGGTTTCGGTGGTCAGACCAAGCCAGTTTTCCACAAGAAGGCCAAGACCACCAAGAAGGTCGTTTTGAGATTGGAGTGTGTCAACTGCAAGACCAAGGCTCAGTTGGCTTTGAAGAGATGTAAGCACTTCGAGTTGGGTGGTGACAAGAAGCAAAAGGGTCAAGCTTTGCAGTTTTAA	#VALUE!	151	#VALUE!	#VALUE!	#VALUE!	#VALUE!	#VALUE!
yHMPu5000035709_candida_dosseyi_160519_g005488.m1	4236	ATGGTTAACGTTCCAAAGCTCAGAAAGACTTACTGTAAGGGTAAGCTGTGCAAGAAGCACACCCAACACAAGGTTACCCAATACAAGGCTGGTAAGGCTTCCTTGTTCGCCCAGGGTAAGAGAAGATACGACCGTAAGCAGTCTGGTTTCGGTGGTCAGACCAAGCCAGTTTTCCACAAGAAGGCCAAGACCACCAAGAAGGTCGTTTTGAGATTGGAGTGTGTCAACTGCAAGACCAAGGCTCAGTTGGCTTTGAAGAGATGTAAGCACTTCGAGTTGGGTGGTGACAAGAAGCAAAAGGGTCAAGCTTTGCAGTTTTAA	ATGGTTAACGTTCCAAAGCTCAGAAAGACTTACTGTAAGGGTAAGCTGTGCAAGAAGCACACCCAACACAAGGTTACCCAATACAAGGCTGGTAAGGCTTCCTTGTTCGCCCAGGGTAAGAGAAGATACGACCGTAAGCAGTCTGGTTTCGGTGGTCAGACCAAGCCAGTTTTCCACAAGAAGGCCAAGACCACCAAGAAGGTCGTTTTGAGATTGGAGTGTGTCAACTGCAAGACCAAGGCTCAGTTGGCTTTGAAGAGATGTAAGCACTTCGAGTTGGGTGGTGACAAGAAGCAAAAGGGTCAAGCTTTGCAGTTTTAA	#VALUE!	151	#VALUE!	#VALUE!	#VALUE!	#VALUE!	#VALUE!
yHMPu5000037869_metschnikowia_australis_190924_g002112.m1	4236	ATGTCGGCCCATATATTCCATAAGATCCTTAACGTTCCAAAGGTCAGAAAAACCTTCTGTAAGGGTAAGGAATGCCGCAAGCACACCCAACACAAAGTCACCCAATACAAGGCTGGTAAGGCTTCTTTGTTCGCCCAAGGTAAGAGAAGATACGACCGTAAGCAGTCCGGTTTCGGTGGTCAGACCAAGCCAGTTTTCCACAAGAAGGCCAAGACCACCAAGAAGGTTGTCTTGAGATTGGAGTGTGTCGTTTGTAAGACCAAGGCCCAGCTCTCCTTGAAGAGATGTAAGCACTTCGAGTTGGGTGGTGACAAGAAGCAAAAGGGTCAAGCTTTGCAATTCTAA	ATGTCGGCCCATATATTCCATAAGATCCTTAACGTTCCAAAGGTCAGAAAAACCTTCTGTAAGGGTAAGGAATGCCGCAAGCACACCCAACACAAAGTCACCCAATACAAGGCTGGTAAGGCTTCTTTGTTCGCCCAAGGTAAGAGAAGATACGACCGTAAGCAGTCCGGTTTCGGTGGTCAGACCAAGCCAGTTTTCCACAAGAAGGCCAAGACCACCAAGAAGGTTGTCTTGAGATTGGAGTGTGTCGTTTGTAAGACCAAGGCCCAGCTCTCCTTGAAGAGATGTAAGCACTTCGAGTTGGGTGGTGACAAGAAGCAAAAGGGTCAAGCTTTGCAATTCTAA	#VALUE!	175	#VALUE!	#VALUE!	#VALUE!	#VALUE!	#VALUE!
yHMPu5000038353_candida_smagusa_170713_g007252.m1	4236	ATGGGTATGTTGAAACAAGAAACCGATGAAAGCGGTGCTCTAAGATCTTCTATTAACGTTCCAAAAACTAGAAAGACCTACTGTAAGGGTAAGGAATGTCGTAAGCACACTCAACACAAGGTTTCCCAATACAAGGCTGGTAAGGCTTCTTTGTTCGCCCAAGGTAAGAGAAGATATGACAGAAAGCAATCCGGTTTCGGTGGTCAAACCAAGCCAGTTTTCCACAAGAAGGCTAAGACTACCAAGAAGGTTGTCTTGAGATTGGAATGTATCGTCTGTAAGACCAAGGCTCAATTGACTTTGAAGAGATGTAAGCACTTCGAATTGGGTGGTGACAAGAAGCAAAAGGGTCAAGCTTTGCAATTCTAA	ATGGGTATGTTGAAACAAGAAACCGATGAAAGCGGTGCTCTAAGATCTTCTATTAACGTTCCAAAAACTAGAAAGACCTACTGTAAGGGTAAGGAATGTCGTAAGCACACTCAACACAAGGTTTCCCAATACAAGGCTGGTAAGGCTTCTTTGTTCGCCCAAGGTAAGAGAAGATATGACAGAAAGCAATCCGGTTTCGGTGGTCAAACCAAGCCAGTTTTCCACAAGAAGGCTAAGACTACCAAGAAGGTTGTCTTGAGATTGGAATGTATCGTCTGTAAGACCAAGGCTCAATTGACTTTGAAGAGATGTAAGCACTTCGAATTGGGTGGTGACAAGAAGCAAAAGGGTCAAGCTTTGCAATTCTAA	199		199	GGTGGTCAAACCAAG	VALID	CCA	Proline
yHMPu5000037907_candida_fungicola_180604_g004346.m1	4236	ATGGGTATGTTGAAACAAGAAACCGAACAAACCGGTGCACTAGGATCATCAACAGATGACCCAAAGCATATTAACGTTCCAAAAACTAGAAAGACCTACTGTAAGGGTAAGGAATGTCGTAAGCACACTCAACACAAGGTTTCCCAATACAAGGCTGGTAAGGCTTCTTTGTTCGCCCAAGGTAAGAGAAGATATGACAGAAAGCAATCCGGTTTCGGTGGTCAAACCAAGCCAGTTTTCCACAAGAAGGCTAAGACCACCAAGAAGGTTGTCTTGAGATTGGAATGTATCGTCTGTAAGACCAAGGCTCAATTGACTTTGAAGAGATGTAAGCACTTCGAATTGGGTGGTGACAAGAAGCAAAAGGGTCAAGCTTTGCAATTCTAA	ATGGGTATGTTGAAACAAGAAACCGAACAAACCGGTGCACTAGGATCATCAACAGATGACCCAAAGCATATTAACGTTCCAAAAACTAGAAAGACCTACTGTAAGGGTAAGGAATGTCGTAAGCACACTCAACACAAGGTTTCCCAATACAAGGCTGGTAAGGCTTCTTTGTTCGCCCAAGGTAAGAGAAGATATGACAGAAAGCAATCCGGTTTCGGTGGTCAAACCAAGCCAGTTTTCCACAAGAAGGCTAAGACCACCAAGAAGGTTGTCTTGAGATTGGAATGTATCGTCTGTAAGACCAAGGCTCAATTGACTTTGAAGAGATGTAAGCACTTCGAATTGGGTGGTGACAAGAAGCAAAAGGGTCAAGCTTTGCAATTCTAA	217		217	GGTGGTCAAACCAAG	VALID	CCA	Proline
yHMPu5000037211_candida_parablackwelliae_210210_g005963.m1	4236	ATGATTGCCACATTTAACGTTCCAAAGACCAGAAAGACCTACTGTAAGGGTAAGGAATGTCGTAAACACACCCAACACAAGGTTACCCAATACAAGGCCGGTAAGTCGTCCCTCTTTGCCCAAGGTAAGAGAAGATATGACCGTAAGCAAGCCGGTTTCGGTGGTCAAACCAAGCCAGTTTTCCACAAGAAGGCCAAGACCACCAAGAAGGTTGTCTTGAGATTGGAATGTGTTGTTTGCAAGACCAAGGCTCAATTGTCGTTGAAGAGATGTAAGCACTTTGAATTGGGTGGTGATAAGAAACAAAAGGGTCAAGCTTTGCAATTCTAG	ATGATTGCCACATTTAACGTTCCAAAGACCAGAAAGACCTACTGTAAGGGTAAGGAATGTCGTAAACACACCCAACACAAGGTTACCCAATACAAGGCCGGTAAGTCGTCCCTCTTTGCCCAAGGTAAGAGAAGATATGACCGTAAGCAAGCCGGTTTCGGTGGTCAAACCAAGCCAGTTTTCCACAAGAAGGCCAAGACCACCAAGAAGGTTGTCTTGAGATTGGAATGTGTTGTTTGCAAGACCAAGGCTCAATTGTCGTTGAAGAGATGTAAGCACTTTGAATTGGGTGGTGATAAGAAACAAAAGGGTCAAGCTTTGCAATTCTAG	160		160	GGTGGTCAAACCAAG	VALID	CCA	Proline
yHMPu5000034994_candida_neerlandica_190924_g004776.m1	4236	ATGGGTATGTTCATATATACCATTAGTTATGATGATTTCCCAAATACAAAGAGATTGATAAATGATTCTATTACATGTGTTTCGAATAATATAACCAAGAGAAAGATGTGGAGATCTCAAGAACGATTTAACGTTCCAAAAACTAGAAAGACCTACTGTAAAGGTAAAGAATGTCGTAAACACACTCAACACAAAGTTACCCAATACAAAGCTGGTAAATCATCTTTATTCGCTCAAGGTAAGAGAAGATATGACCGTAAACAAGCCGGTTTCGGTGGTCAAACCAAACCAGTTTTCCACAAAAAGGCCAAGACTACCAAGAAAGTTGTTTTGAGATTGGAATGTGTCGTCTGTAAGACCAAAGCTCAATTGTCCTTGAAGAGATGTAAACATTTCGAA…	ATGGGTATGTTCATATATACCATTAGTTATGATGATTTCCCAAATACAAAGAGATTGATAAATGATTCTATTACATGTGTTTCGAATAATATAACCAAGAGAAAGATGTGGAGATCTCAAGAACGATTTAACGTTCCAAAAACTAGAAAGACCTACTGTAAAGGTAAAGAATGTCGTAAACACACTCAACACAAAGTTACCCAATACAAAGCTGGTAAATCATCTTTATTCGCTCAAGGTAAGAGAAGATATGACCGTAAACAAGCCGGTTTCGGTGGTCAAACCAAACCAGTTTTCCACAAAAAGGCCAAGACTACCAAGAAAGTTGTTTTGAGATTGGAATGTGTCGTCTGTAAGACCAAAGCTCAATTGTCCTTGAAGAGATGTAAACATTTCGAA…	274		274	GGTGGTCAAACCAAA	VALID	CCA	Proline
yHMPu5000035671_phaffomyces_antillensis_160613_g003212.m1	4236	ATGGTTAACGTTCCAAAAACCAGAAAAACCTACTGTAAAGGTAAAGATTGTAAAAAACACACTCAACACAAAGTTACCCAATACAAAGCAGGTAAAGCTTCTTTATTTGCTCAAGGTAAAAGACGTTATGACCGTAAACAATCCGGTTTTGGTGGTCAAACTAAACCAGTTTTCCATAAAAAGGCTAAAACTACCAAAAAAGTTGTTTTACGTTTAGAATGTGTTGTCTGTAAAACCAGAGCTCAATTATCATTAAAACGTTGTAAACATTTTGAATTAGGTGGTGACAGAAAACAAAAAGGTCAAGCTTTACAATTCTAG	ATGGTTAACGTTCCAAAAACCAGAAAAACCTACTGTAAAGGTAAAGATTGTAAAAAACACACTCAACACAAAGTTACCCAATACAAAGCAGGTAAAGCTTCTTTATTTGCTCAAGGTAAAAGACGTTATGACCGTAAACAATCCGGTTTTGGTGGTCAAACTAAACCAGTTTTCCATAAAAAGGCTAAAACTACCAAAAAAGTTGTTTTACGTTTAGAATGTGTTGTCTGTAAAACCAGAGCTCAATTATCATTAAAACGTTGTAAACATTTTGAATTAGGTGGTGACAGAAAACAAAAAGGTCAAGCTTTACAATTCTAG	151		151	GGTGGTCAAACTAAA	VALID	CCA	Proline
yHMPu5000038389_candida_ficus_170713_g003239.m1	4236	ATGGTTAACGTTCCAAAAACCAGAAAAACCTTCTGTAAAGGTAAAGATTGTCGTAAACACACTCAACACAAAGTTACCCAATACAAAGCTGGTAAAGCTTCATTATTCGCCCAAGGTAAAAGACGTTATGACCGTAAACAAGCCGGTTACGGTGGTCAAACCAAACCAGTCTTCCACAAAAAGGCTAAAACTACCAAAAAAGTTGTTTTACGTTTAGAATGTGTTGTCTGTAAAACCAGAGCTCAATTATCATTAAAACGTTGTAAACATTTTGAATTAGGTGGTGACAAAAAACAAAAAGGTCAAGCTTTACAATTCTAG	ATGGTTAACGTTCCAAAAACCAGAAAAACCTTCTGTAAAGGTAAAGATTGTCGTAAACACACTCAACACAAAGTTACCCAATACAAAGCTGGTAAAGCTTCATTATTCGCCCAAGGTAAAAGACGTTATGACCGTAAACAAGCCGGTTACGGTGGTCAAACCAAACCAGTCTTCCACAAAAAGGCTAAAACTACCAAAAAAGTTGTTTTACGTTTAGAATGTGTTGTCTGTAAAACCAGAGCTCAATTATCATTAAAACGTTGTAAACATTTTGAATTAGGTGGTGACAAAAAACAAAAAGGTCAAGCTTTACAATTCTAG	151		151	GGTGGTCAAACCAAA	VALID	CCA	Proline
yHMPu5000037921_ascoidea_asiatica_201018_g004849.m1	4236	ATGGTTAACGTTCCAAAAACAAGAAAAACCTATTGTAAAGGTAAAAATTGCAAAAAACACACCCAGCATAAAGTTACTCAATATAAAGCTGGTAAAGCCTCATTATTTGCTCAAGGTAAACGTCGTTATGACCGTAAACAATCTGGTTTCGGTGGTCAAACTAAACCTGTTTTCCACAAAAAAGCTAAAACAACAAAAAAAATTGTTTTACGTTTAGAATGTGTTGTTTGCAAAACCAAAGCTCAACTTGCTATTAAACGTTGTAAACATTTCGAATTAGGTGGTGATAAAAAACAAAAGGGTCAAGCTTTACAATTTTAG	ATGGTTAACGTTCCAAAAACAAGAAAAACCTATTGTAAAGGTAAAAATTGCAAAAAACACACCCAGCATAAAGTTACTCAATATAAAGCTGGTAAAGCCTCATTATTTGCTCAAGGTAAACGTCGTTATGACCGTAAACAATCTGGTTTCGGTGGTCAAACTAAACCTGTTTTCCACAAAAAAGCTAAAACAACAAAAAAAATTGTTTTACGTTTAGAATGTGTTGTTTGCAAAACCAAAGCTCAACTTGCTATTAAACGTTGTAAACATTTCGAATTAGGTGGTGATAAAAAACAAAAGGGTCAAGCTTTACAATTTTAG	151		151	GGTGGTCAAACTAAA	VALID	CCT	Proline
yHMPu5000034634_millerozyma_acaciae_160519_g000499.m1	4236	ATGGTTAACGTTCCAAAGACTAGAAAGACTTACTGTAAGGGTAAAGATTGTCGTAAGCACACTCAACACAAGGTCACCCAATATAAGGCTGGTAAGGCTTCTCTCTTTGCCCAAGGTAAGAGAAGATATGACCGTAAGCAAAAGGGTTACGGTGGTCAAACCAAGCCAGTTTTCCGTAAGAAGGCTAAGACTACCAAGAAGGTTGTGTTAAGATTGGAATGTGTTGTCTGCAAGACCAAGGCTCAATTGTCTTTGAAGAGATGTAAGCACTTCGAATTAGGTGGTGACAAGAAGCAAAAGGGTCAAGCTTTGCAATTTTAA	ATGGTTAACGTTCCAAAGACTAGAAAGACTTACTGTAAGGGTAAAGATTGTCGTAAGCACACTCAACACAAGGTCACCCAATATAAGGCTGGTAAGGCTTCTCTCTTTGCCCAAGGTAAGAGAAGATATGACCGTAAGCAAAAGGGTTACGGTGGTCAAACCAAGCCAGTTTTCCGTAAGAAGGCTAAGACTACCAAGAAGGTTGTGTTAAGATTGGAATGTGTTGTCTGCAAGACCAAGGCTCAATTGTCTTTGAAGAGATGTAAGCACTTCGAATTAGGTGGTGACAAGAAGCAAAAGGGTCAAGCTTTGCAATTTTAA	151		151	GGTGGTCAAACCAAG	VALID	CCA	Proline
yHMPu5000041693_debaryomyces_nepalensis_170307_g003308.m1	4236	ATGATAACATGTAATGAATTTAACGTTCCAAAGACTAGAAGGACTTACTGTAAGGGTAAGGAATGTCGTAAGCATACTCAACACAAGGTTACCCAATACAAGGCCGGTAAAGCCTCCTTATTCGCTCAAGGTAAGAGAAGATATGACCGTAAGCAAAAGGGTTACGGTGGTCAAACCAAGCCAGTTTTCCACAAGAAAGCTAAGACTACCAAGAAGGTTGTTTTAAGATTGGAATGTGTTGTCTGTAAGACCAAGGCTCAATTAGCTTTAAAGAGATGTAAGCACTTCGAATTAGGTGGTGACAAGAAGCAAAAGGGTCAAGCTTTACAATTTTAA	ATGATAACATGTAATGAATTTAACGTTCCAAAGACTAGAAGGACTTACTGTAAGGGTAAGGAATGTCGTAAGCATACTCAACACAAGGTTACCCAATACAAGGCCGGTAAAGCCTCCTTATTCGCTCAAGGTAAGAGAAGATATGACCGTAAGCAAAAGGGTTACGGTGGTCAAACCAAGCCAGTTTTCCACAAGAAAGCTAAGACTACCAAGAAGGTTGTTTTAAGATTGGAATGTGTTGTCTGTAAGACCAAGGCTCAATTAGCTTTAAAGAGATGTAAGCACTTCGAATTAGGTGGTGACAAGAAGCAAAAGGGTCAAGCTTTACAATTTTAA	166		166	GGTGGTCAAACCAAG	VALID	CCA	Proline
yHMPu5000041825_debaryomyces_robertsiae_170307_g003853.m1	4236	ATGCGGCTAAAATCAGAAACCAGTGGAATCTCGAGGTTTGAAAATTTCTCCATCAACGTTAACGTTCCAAAGACTAGAAGGACTTACTGTAAGGGTAGAGAATGTCGTAAGCATACTCAACACAAGGTTACCCAATACAAGGCCGGTAAGGCTTCCTTGTTCGCCCAAGGTAAGAGAAGATATGACCGTAAGCAAAAGGGTTACGGTGGTCAAACCAAGCCTGTTTTCCACAAAAAGGCCAAGACTACCAAGAAGGTTGTTTTGAGATTGGAATGTGTTGTTTGCAAGACCAAGGCCCAATTAGCCTTGAAGAGATGTAAGCACTTCGAGTTGGGTGGTGACAAGAAACAAAAGGGTCAAGCCTTGCAATTTTAA	ATGCGGCTAAAATCAGAAACCAGTGGAATCTCGAGGTTTGAAAATTTCTCCATCAACGTTAACGTTCCAAAGACTAGAAGGACTTACTGTAAGGGTAGAGAATGTCGTAAGCATACTCAACACAAGGTTACCCAATACAAGGCCGGTAAGGCTTCCTTGTTCGCCCAAGGTAAGAGAAGATATGACCGTAAGCAAAAGGGTTACGGTGGTCAAACCAAGCCTGTTTTCCACAAAAAGGCCAAGACTACCAAGAAGGTTGTTTTGAGATTGGAATGTGTTGTTTGCAAGACCAAGGCCCAATTAGCCTTGAAGAGATGTAAGCACTTCGAGTTGGGTGGTGACAAGAAACAAAAGGGTCAAGCCTTGCAATTTTAA	205		205	GGTGGTCAAACCAAG	VALID	CCT	Proline
yHMPu5000034993_candida_metapsilosis_170307.haplomerger2_g001846.m1	4236	ATGAGAGTTGTGACTGTGATTTTCCCCATGAACGTTCCAAAAACTAGAAGAACCTACTGTAAAGGTAGAGACTGCCGTAAACACACCCAACACAAGGTTACCCAATACAAAGCCGGTAAAGCTTCATTGTTTGCTCAAGGTAAGAGAAGATATGACAGAAAACAAAAGGGTTATGGTGGTCAAACCAAGCCAGTTTTCCACAAAAAGGCCAAGACTACCAAGAAAGTTGTTTTGAGATTGGAATGTGTCGTCTGTAAGACCAAGGCTCAATTGGCTTTGAAGAGATGTAAACATTTCGAATTGGGTGGTGACAAGAAACAAAAGGGTCAAGCTTTGCAATTCTAA	ATGAGAGTTGTGACTGTGATTTTCCCCATGAACGTTCCAAAAACTAGAAGAACCTACTGTAAAGGTAGAGACTGCCGTAAACACACCCAACACAAGGTTACCCAATACAAAGCCGGTAAAGCTTCATTGTTTGCTCAAGGTAAGAGAAGATATGACAGAAAACAAAAGGGTTATGGTGGTCAAACCAAGCCAGTTTTCCACAAAAAGGCCAAGACTACCAAGAAAGTTGTTTTGAGATTGGAATGTGTCGTCTGTAAGACCAAGGCTCAATTGGCTTTGAAGAGATGTAAACATTTCGAATTGGGTGGTGACAAGAAACAAAAGGGTCAAGCTTTGCAATTCTAA	175		175	GGTGGTCAAACCAAG	VALID	CCA	Proline
yHMPu5000034992_candida_maltosa_190924.haplomerger2_g002944.m1	4236	ATGAACAACGAAATGATGTTGAATAGGGAGAAGACATTGATACGTTGCATTAACGTTCCAAAAACTAGAAAGACCTACTGTAAAGGTAGAGAATGTCGTAAACACACTCAACACAAAGTTACCCAATACAAAGCTGGTAAATCATCTTTATTCGCTCAAGGTAAGAGAAGATATGACAGAAAACAATCCGGTTTCGGTGGTCAAACCAAACCAGTTTTCCACAAAAAAGCTAAAACTACCAAAAAAGTTGTTTTAAGATTGGAATGTGTTGTCTGTAAAACCAAGGCTCAATTAGCTTTAAAGAGATGTAAACATTTCGAATTGGGTGGTGACAAAAAACAAAAAGGTCAAGCTTTACAATTCTAA	ATGAACAACGAAATGATGTTGAATAGGGAGAAGACATTGATACGTTGCATTAACGTTCCAAAAACTAGAAAGACCTACTGTAAAGGTAGAGAATGTCGTAAACACACTCAACACAAAGTTACCCAATACAAAGCTGGTAAATCATCTTTATTCGCTCAAGGTAAGAGAAGATATGACAGAAAACAATCCGGTTTCGGTGGTCAAACCAAACCAGTTTTCCACAAAAAAGCTAAAACTACCAAAAAAGTTGTTTTAAGATTGGAATGTGTTGTCTGTAAAACCAAGGCTCAATTAGCTTTAAAGAGATGTAAACATTTCGAATTGGGTGGTGACAAAAAACAAAAAGGTCAAGCTTTACAATTCTAA	196		196	GGTGGTCAAACCAAA	VALID	CCA	Proline
yHMPu5000035260_candida_peoriensis_170713_g004059.m1	4236	ATGATTTCAGACGTTCTACAAGATGACTACAAGATTAACGTTCCAAAAGTCAGAAAAACCTACTGTAAGGGTAAAGAATGTCGTAAACATACCCAACACAAAGTTACCCAATACAAAGCTGGTAAAGCTTCTTTGTTCGCTCAAGGTAAACGTCGTTATGATCGTAAACAATCCGGTTACGGTGGTCAAACCAAACCAGTTTTCCACAAAAAGGCTAAAACTACTAAAAAAGTTGTCTTACGTCTTGAATGTGTTGTTTGCAAAACCAAAGCTCAATTATCTTTAAAACGTTGTAAACATTTCGAATTAGGTGGTGACAAAAAACAAAAAGGTGCTGCTTTACAATTTTAA	ATGATTTCAGACGTTCTACAAGATGACTACAAGATTAACGTTCCAAAAGTCAGAAAAACCTACTGTAAGGGTAAAGAATGTCGTAAACATACCCAACACAAAGTTACCCAATACAAAGCTGGTAAAGCTTCTTTGTTCGCTCAAGGTAAACGTCGTTATGATCGTAAACAATCCGGTTACGGTGGTCAAACCAAACCAGTTTTCCACAAAAAGGCTAAAACTACTAAAAAAGTTGTCTTACGTCTTGAATGTGTTGTTTGCAAAACCAAAGCTCAATTATCTTTAAAACGTTGTAAACATTTCGAATTAGGTGGTGACAAAAAACAAAAAGGTGCTGCTTTACAATTTTAA	181		181	GGTGGTCAAACCAAA	VALID	CCA	Proline
yHMPu5000038048_wickerhamomyces_mucosus_170912.haplomerger2_g003765.m1	4236	ATGGTTAACGTTCCAAAAACTAGAAAAACCTATTGTAAAGGTAAAGAATGCCGTAAACACACAGTTCACAAAGTCACCCAATATAAAGCTGGTAAAGCTTCTTTATTTGCTCAAGGTAAAAGACGTTATGACCGTAAACAATCAGGTTACGGTGGTCAAACCAAACCAGTTTTCCATAAAAAAGCCAAAACTACCAAAAAAGTTGTTTTACGTTTAGAATGTACTATCTGTAAAACCAAAGCTCAATTATCATTAAAACGTTGTAAACATTTCGAATTAGGTGGTGACAGAAAACAAAAAGGTCAAGCTTTACAATTCTAA	ATGGTTAACGTTCCAAAAACTAGAAAAACCTATTGTAAAGGTAAAGAATGCCGTAAACACACAGTTCACAAAGTCACCCAATATAAAGCTGGTAAAGCTTCTTTATTTGCTCAAGGTAAAAGACGTTATGACCGTAAACAATCAGGTTACGGTGGTCAAACCAAACCAGTTTTCCATAAAAAAGCCAAAACTACCAAAAAAGTTGTTTTACGTTTAGAATGTACTATCTGTAAAACCAAAGCTCAATTATCATTAAAACGTTGTAAACATTTCGAATTAGGTGGTGACAGAAAACAAAAAGGTCAAGCTTTACAATTCTAA	151		151	GGTGGTCAAACCAAA	VALID	CCA	Proline
yHMPu5000035701_cyberlindnera_fabianii_160519_g001372.m1	4236	ATGGTTAACGTTCCAAAGACCAGAAAGACCTACTGTAAGGGTAAGCAGTGCCGTAAGCACACCACTCACAAGGTCACCCAGTACAAGGCTGGTAAGGCTTCCCTTTTCGCTCAGGGTAAGCGTCGTTACGACCGTAAGCAGTCCGGTTACGGTGGTCAGACCAAGCCAGTCTTCCATAAGAAGGCTAAGACCACCAAGAAGGTTGTTTTGAGATTGGAGTGTGTTGAGTGCAAGACCAAGGCTCAGCTTTCTTTGAAGAGATGTAAGCACTTCGAGCTCGGTGGTGACAAGAAGCAGAAGGGTCAGGCTTTGCAGTTCTAA	ATGGTTAACGTTCCAAAGACCAGAAAGACCTACTGTAAGGGTAAGCAGTGCCGTAAGCACACCACTCACAAGGTCACCCAGTACAAGGCTGGTAAGGCTTCCCTTTTCGCTCAGGGTAAGCGTCGTTACGACCGTAAGCAGTCCGGTTACGGTGGTCAGACCAAGCCAGTCTTCCATAAGAAGGCTAAGACCACCAAGAAGGTTGTTTTGAGATTGGAGTGTGTTGAGTGCAAGACCAAGGCTCAGCTTTCTTTGAAGAGATGTAAGCACTTCGAGCTCGGTGGTGACAAGAAGCAGAAGGGTCAGGCTTTGCAGTTCTAA	#VALUE!	151	#VALUE!	#VALUE!	#VALUE!	#VALUE!	#VALUE!
kazachstania_naganishii_g004979.m1	4236	ATGGTTAACGTTCCAAAGACCAGAAAGACTTACTGTAAGGGTAAGACCTGCCGTAAGCACACCCAGCACAAGGTCACTCAATACAAGGCAGGTAAGGCTTCTCTATTTGCCCAAGGTAAGAGACGTTACGACCGGAAGCAATCTGGTTTCGGTGGTCAGACCAAGCCTGTTTTCCACAAAAAGGCCAAGACTACCAAGAAGGTTGTCTTGAGATTGGAATGTGTCGCTTGTAAGACGAGAGCCCAGTTGACTTTGAAGAGATGTAAGCATTTCGAATTGGGTGGTGAGAAGAAGCAAAAGGGTGCTGCTTTGCAATTTTAA	ATGGTTAACGTTCCAAAGACCAGAAAGACTTACTGTAAGGGTAAGACCTGCCGTAAGCACACCCAGCACAAGGTCACTCAATACAAGGCAGGTAAGGCTTCTCTATTTGCCCAAGGTAAGAGACGTTACGACCGGAAGCAATCTGGTTTCGGTGGTCAGACCAAGCCTGTTTTCCACAAAAAGGCCAAGACTACCAAGAAGGTTGTCTTGAGATTGGAATGTGTCGCTTGTAAGACGAGAGCCCAGTTGACTTTGAAGAGATGTAAGCATTTCGAATTGGGTGGTGAGAAGAAGCAAAAGGGTGCTGCTTTGCAATTTTAA	#VALUE!	151	#VALUE!	#VALUE!	#VALUE!	#VALUE!	#VALUE!
yHAB132_kazachstania_martiniae_160519_g000737.m1	4236	ATGGTTAACGTTCCAAAGACTAGAAAGACTTACTGTAAGGGTAAGCAATGTCGTAAGCACACCCAACATAAGGTTACTCAATACAAGGCTGGTAAGGCTTCCTTATTTGCTCAAGGTAAGAGACGTTATGACCGTAAACAATCTGGTTTCGGTGGTCAAACTAAGCCAGTTTTCCACAAGAAAGCTAAGACTACCAAGAAAGTTGTTTTAAGATTAGAATGTGTTGCTTGTAAGACTAGAGCTCAATTAACTTTAAAGAGATGTAAGCATTTTGAATTAGGTGGTGAAAAGAAGCAAAAGGGTGCTGCTTTACAATTCTGA	ATGGTTAACGTTCCAAAGACTAGAAAGACTTACTGTAAGGGTAAGCAATGTCGTAAGCACACCCAACATAAGGTTACTCAATACAAGGCTGGTAAGGCTTCCTTATTTGCTCAAGGTAAGAGACGTTATGACCGTAAACAATCTGGTTTCGGTGGTCAAACTAAGCCAGTTTTCCACAAGAAAGCTAAGACTACCAAGAAAGTTGTTTTAAGATTAGAATGTGTTGCTTGTAAGACTAGAGCTCAATTAACTTTAAAGAGATGTAAGCATTTTGAATTAGGTGGTGAAAAGAAGCAAAAGGGTGCTGCTTTACAATTCTGA	151		151	GGTGGTCAAACTAAG	VALID	CCA	Proline
yHAB132_kazachstania_martiniae_160519_g003122.m1	4236	ATGAGTGGCCCAGAAGAGGATAAAAAGATACAAGGTACCATAACTACATGTCCTGAATGTAAAAGTGCATTACAGAAATGCCTAATACAGCAAAACTACGCTATGGTAATATGCCCAAGTCTAACTTGTGGTTATCCTTTTAATCAGGCTCCTGTTCTAGACAATCTAGTATACATTGATGATAAGGATGTACTGGATGTTGCACAAAGACAAGCCACAGGTAAAGCCCGAGAGCTAGCTCAACTGTGTGTAGCCGGAAGTAAACCAATACTAGTTTGGGAGCAAGAAACCAGATGTCTAGGCAGAGAACATAATACGGTTCCCTTTATTAACGTTCCAAAGACTAGAAAGACTTACTGTAAGGGTAAGCAATGTCGTAAGCACACCCAACACAAGGTT…	ATGAGTGGCCCAGAAGAGGATAAAAAGATACAAGGTACCATAACTACATGTCCTGAATGTAAAAGTGCATTACAGAAATGCCTAATACAGCAAAACTACGCTATGGTAATATGCCCAAGTCTAACTTGTGGTTATCCTTTTAATCAGGCTCCTGTTCTAGACAATCTAGTATACATTGATGATAAGGATGTACTGGATGTTGCACAAAGACAAGCCACAGGTAAAGCCCGAGAGCTAGCTCAACTGTGTGTAGCCGGAAGTAAACCAATACTAGTTTGGGAGCAAGAAACCAGATGTCTAGGCAGAGAACATAATACGGTTCCCTTTATTAACGTTCCAAAGACTAGAAAGACTTACTGTAAGGGTAAGCAATGTCGTAAGCACACCCAACACAAGGTT…	475		475	GGTGGTCAAACTAAG	VALID	CCA	Proline
yHAB137_kazachstania_africana_160519_g003410.m1	4236	ATGGTTAACGTTCCAAAGACTAGAAAGACCTACTGTAAGGGTAAGGCCTGTCGTAAGCACACCCAACACAAAGTTACTCAATACAAGGCTGGTAAGGCTTCTTTATTTGCTCAAGGTAAGAGACGTTATGACCGTAAACAATCTGGTTTTGGTGGTCAAACTAAGCCAGTTTTCCACAAGAAAGCCAAGACTACCAAGAAGGTTGTGTTAAGATTAGAATGTGTCAACTGTAAGACCAAGGCCCAATTAACTTTGAAGAGATGTAAGCATTTCGAATTAGGTGGTGAAAAGAAACAAAAGGGTGCTGCTTTACAATTCTAA	ATGGTTAACGTTCCAAAGACTAGAAAGACCTACTGTAAGGGTAAGGCCTGTCGTAAGCACACCCAACACAAAGTTACTCAATACAAGGCTGGTAAGGCTTCTTTATTTGCTCAAGGTAAGAGACGTTATGACCGTAAACAATCTGGTTTTGGTGGTCAAACTAAGCCAGTTTTCCACAAGAAAGCCAAGACTACCAAGAAGGTTGTGTTAAGATTAGAATGTGTCAACTGTAAGACCAAGGCCCAATTAACTTTGAAGAGATGTAAGCATTTCGAATTAGGTGGTGAAAAGAAACAAAAGGGTGCTGCTTTACAATTCTAA	151		151	GGTGGTCAAACTAAG	VALID	CCA	Proline
yHAB148_kazachstania_intestinalis_160519_g003127.m1	4236	ATGGTGAACGTTCCAAAGACCAGAAAGACCTACTGTAAAGGTAAGGCTTGCAGAAAGCACACGCAACACAAGGTGACCCAATACAAAGCCGGTAAGGCCTCTCTTTTCGCTCAAGGTAAGAGACGTTATGACCGTAAACAATCCGGGTTTGGTGGTCAAACCAAGCCAGTTTTCCACAAAAAGGCTAAGACCACTAAGAAGGTCGTTTTAAGATTGGAATGTGTCTCCTGTAAGACAAAGGCTCAATTGACTTTGAAGAGATGTAAGCACTTCGAATTGGGTGGTGAAAAGAAGCAAAAGGGTGCTGCTCTACAATTTTAA	ATGGTGAACGTTCCAAAGACCAGAAAGACCTACTGTAAAGGTAAGGCTTGCAGAAAGCACACGCAACACAAGGTGACCCAATACAAAGCCGGTAAGGCCTCTCTTTTCGCTCAAGGTAAGAGACGTTATGACCGTAAACAATCCGGGTTTGGTGGTCAAACCAAGCCAGTTTTCCACAAAAAGGCTAAGACCACTAAGAAGGTCGTTTTAAGATTGGAATGTGTCTCCTGTAAGACAAAGGCTCAATTGACTTTGAAGAGATGTAAGCACTTCGAATTGGGTGGTGAAAAGAAGCAAAAGGGTGCTGCTCTACAATTTTAA	151		151	GGTGGTCAAACCAAG	VALID	CCA	Proline
yHDO566_kazachstania_ichnusensis_180604_g003855.m1	4236	ATGGTGAACGTTCCAAAGACTAGAAAGACCTACTGCAAAGGTAAAGCTTGTAGAAAACACACTCAACACAAGGTCACCCAATACAAAGCTGGTAAAGCTTCTCTTTTTGCTCAAGGTAAGAGACGTTATGACCGTAAACAATCGGGTTTTGGTGGTCAAACCAAGCCAGTGTTCCACAAGAAAGCTAAGACTACCAAAAAAGTCGTTTTAAGATTGGAATGTGTCTCTTGTAAGACGAAGGCTCAATTGACTTTGAAGAGATGTAAGCATTTCGAATTAGGTGGTGAAAAGAAACAAAAAGGTGCTGCTTTACAATTTTAG	ATGGTGAACGTTCCAAAGACTAGAAAGACCTACTGCAAAGGTAAAGCTTGTAGAAAACACACTCAACACAAGGTCACCCAATACAAAGCTGGTAAAGCTTCTCTTTTTGCTCAAGGTAAGAGACGTTATGACCGTAAACAATCGGGTTTTGGTGGTCAAACCAAGCCAGTGTTCCACAAGAAAGCTAAGACTACCAAAAAAGTCGTTTTAAGATTGGAATGTGTCTCTTGTAAGACGAAGGCTCAATTGACTTTGAAGAGATGTAAGCATTTCGAATTAGGTGGTGAAAAGAAACAAAAAGGTGCTGCTTTACAATTTTAG	151		151	GGTGGTCAAACCAAG	VALID	CCA	Proline
yHDO566_kazachstania_ichnusensis_180604_g002889.m1	4236	ATGGAGGTACAGACCACTAATAATGAAAAACAGTGTCCTGACTGCGGTGAAGCATTGCAGAAATGTTTAATTCAGCAGAATTACGCTATGGTGCTTTGCTTGAACCAACACTGCCACTCGTTCGAGACTAACAAAGCAGTGACGGTTGATGAGGTTCACTTGTTTGGGACTGGTTTGGATACAAATGAAACACCCTCGTCCGCAAGCACGTCGGATGTGTTACAATTTGGTGTAGAGAACGCCGTCAGTAACTTACTTGAGTATTTAGGTTTACAAGGAATTGGTGCCTTAATTACTAGATTCCCTAGCCGAATAGCACTTCAACGTGACCAACTCTGTGTGTATTTATTAGTTAACGTTCCAAAGACTAGAAAAACCTATTGTAAGGGTAAGGCTTGT…	ATGGAGGTACAGACCACTAATAATGAAAAACAGTGTCCTGACTGCGGTGAAGCATTGCAGAAATGTTTAATTCAGCAGAATTACGCTATGGTGCTTTGCTTGAACCAACACTGCCACTCGTTCGAGACTAACAAAGCAGTGACGGTTGATGAGGTTCACTTGTTTGGGACTGGTTTGGATACAAATGAAACACCCTCGTCCGCAAGCACGTCGGATGTGTTACAATTTGGTGTAGAGAACGCCGTCAGTAACTTACTTGAGTATTTAGGTTTACAAGGAATTGGTGCCTTAATTACTAGATTCCCTAGCCGAATAGCACTTCAACGTGACCAACTCTGTGTGTATTTATTAGTTAACGTTCCAAAGACTAGAAAAACCTATTGTAAGGGTAAGGCTTGT…	499		499	GGTGGTCAAACTAAG	VALID	CCA	Proline
yHAB148_kazachstania_intestinalis_160519_g003722.m1	4236	ATGGTTAACGTTCCAAAGACTAGAAAAACCTACTGTAAGGGTAAGGCTTGTAGAAAGCACACCCAACACAAGGTCACCCAGTACAAAGCTGGTAAGGCTTCTCTATTCGCTCAAGGTAAGAGACGTTATGACCGTAAACAATCCGGTTTCGGTGGTCAAACCAAGCCTGTTTTCCACAAGAAGGCCAAGACCACCAAGAAGGTCGTTTTGAGATTGGAATGTGTTGCTTGTAAGACTAAGGCCCAATTGACTTTGAAGAGATGTAAGCACTTCGAATTAGGTGGTGAAAAGAAACAAAAGGGTGCTGCTCTACAATTTTAA	ATGGTTAACGTTCCAAAGACTAGAAAAACCTACTGTAAGGGTAAGGCTTGTAGAAAGCACACCCAACACAAGGTCACCCAGTACAAAGCTGGTAAGGCTTCTCTATTCGCTCAAGGTAAGAGACGTTATGACCGTAAACAATCCGGTTTCGGTGGTCAAACCAAGCCTGTTTTCCACAAGAAGGCCAAGACCACCAAGAAGGTCGTTTTGAGATTGGAATGTGTTGCTTGTAAGACTAAGGCCCAATTGACTTTGAAGAGATGTAAGCACTTCGAATTAGGTGGTGAAAAGAAACAAAAGGGTGCTGCTCTACAATTTTAA	151		151	GGTGGTCAAACCAAG	VALID	CCT	Proline
yHMPu5000034872_naumovozyma_dairenensis_180604_g005140.m1	4236	ATGCAAGTTACTAACAATAAAATAATATCTGAATTTATGGTGATGAATGATATTAATTACGAAATAGTTAACGTTCCAAAGACCAGAAAGACCTACTGTAAAGGTAAAGCCTGTCGTAAGCACACCCAACACAAGGTTACCCAATACAAAGCTGGTAAGGCCTCTTTGTTTGCTCAAGGTAAGAGACGTTATGACCGTAAACAATCTGGTTTCGGTGGTCAAACTAAGCCAATTTTCCACAAGAAAGCTAAGACTACCAAGAAGGTTGTTTTGAGATTGGAATGTGTTAACTGTAAGACCAAGGCTCAATTAACTTTGAAGAGATGTAAGCATTTCGAATTGGGTGGTGAAAAGAAGCAAAAGGGTGCTGCTTTACAATTCTAA	ATGCAAGTTACTAACAATAAAATAATATCTGAATTTATGGTGATGAATGATATTAATTACGAAATAGTTAACGTTCCAAAGACCAGAAAGACCTACTGTAAAGGTAAAGCCTGTCGTAAGCACACCCAACACAAGGTTACCCAATACAAAGCTGGTAAGGCCTCTTTGTTTGCTCAAGGTAAGAGACGTTATGACCGTAAACAATCTGGTTTCGGTGGTCAAACTAAGCCAATTTTCCACAAGAAAGCTAAGACTACCAAGAAGGTTGTTTTGAGATTGGAATGTGTTAACTGTAAGACCAAGGCTCAATTAACTTTGAAGAGATGTAAGCATTTCGAATTGGGTGGTGAAAAGAAGCAAAAGGGTGCTGCTTTACAATTCTAA	214		214	GGTGGTCAAACTAAG	VALID	CCA	Proline
yHMPu5000034872_naumovozyma_dairenensis_180604_g004439.m1	4236	ATGGATTTAATTAATCATTTTTCTATTGATTTAACTTTTCATTTTATAATAGTTAACGTTCCAAAGACCAGAAAGACCTACTGTAAAGGTAAAGCCTGTCGTAAGCACACCCAACACAAGGTTACCCAATACAAAGCTGGTAAAGCTTCTTTGTTCGCTCAAGGTAAGAGACGTTATGACCGTAAACAATCTGGTTTCGGTGGTCAAACTAAGCCAATTTTCCACAAGAAAGCTAAGACTACCAAGAAGGTTGTTTTGAGATTGGAATGTGTTAACTGTAAGACTAAGGCTCAATTGACTTTGAAGAGATGTAAGCACTTCGAATTAGGTGGTGAAAAGAAGCAAAAGGGTGCTGCTTTACAATTTTGA	ATGGATTTAATTAATCATTTTTCTATTGATTTAACTTTTCATTTTATAATAGTTAACGTTCCAAAGACCAGAAAGACCTACTGTAAAGGTAAAGCCTGTCGTAAGCACACCCAACACAAGGTTACCCAATACAAAGCTGGTAAAGCTTCTTTGTTCGCTCAAGGTAAGAGACGTTATGACCGTAAACAATCTGGTTTCGGTGGTCAAACTAAGCCAATTTTCCACAAGAAAGCTAAGACTACCAAGAAGGTTGTTTTGAGATTGGAATGTGTTAACTGTAAGACTAAGGCTCAATTGACTTTGAAGAGATGTAAGCACTTCGAATTAGGTGGTGAAAAGAAGCAAAAGGGTGCTGCTTTACAATTTTGA	199		199	GGTGGTCAAACTAAG	VALID	CCA	Proline
yHAB137_kazachstania_africana_160519_g003862.m1	4236	ATGGCCATTTTTAACGTTGAATTTGTTACTAACAAAATATTTTTCGAAATAGTTAACGTTCCAAAGACTAGAAAGACCTACTGTAAGGGTAAGACCTGTCGTAAGCACACTCAACACAAGGTTACCCAATACAAAGCTGGTAAGGCTTCCTTATTCGCCCAAGGTAAGAGACGTTATGACCGTAAACAATCCGGTTTCGGTGGTCAAACCAAGCCAGTTTTCCACAAGAAAGCTAAGACTACCAAGAAGGTTGTTTTAAGATTAGAATGTGTTAACTGTAAGACCAAGGCTCAATTAACCTTAAAGAGATGTAAGCACTTCGAATTAGGTGGTGAAAAGAAGCAAAAGGGTGCTGCTTTACAATTTTAA	ATGGCCATTTTTAACGTTGAATTTGTTACTAACAAAATATTTTTCGAAATAGTTAACGTTCCAAAGACTAGAAAGACCTACTGTAAGGGTAAGACCTGTCGTAAGCACACTCAACACAAGGTTACCCAATACAAAGCTGGTAAGGCTTCCTTATTCGCCCAAGGTAAGAGACGTTATGACCGTAAACAATCCGGTTTCGGTGGTCAAACCAAGCCAGTTTTCCACAAGAAAGCTAAGACTACCAAGAAGGTTGTTTTAAGATTAGAATGTGTTAACTGTAAGACCAAGGCTCAATTAACCTTAAAGAGATGTAAGCACTTCGAATTAGGTGGTGAAAAGAAGCAAAAGGGTGCTGCTTTACAATTTTAA	199		199	GGTGGTCAAACCAAG	VALID	CCA	Proline
yHAB158_kazachstania_viticola_160519.haplomerger2_g001287.m1	4236	ATGCGTCTGAAAAAGTTGGAAAATTTCAGCCATTATACGCTGCAAACACAGAGAGTTAGTAGTAGTGAGGAGGAGAGATTCTGCACACATGTGCAGGATTCAGTGATTAACGTTCCAAAGACTAGAAAGACCTACTGTAAGGGTAAGGAATGTCGTAAGCACACTCAACACAAGGTTACCCAATACAAGGCTGGTAAGGCTTCCTTATTTGCCCAAGGTAAGAGACGTTATGACCGTAAACAATCCGGTTTCGGTGGTCAAACCAAGCCAGTTTTCCACAAGAAAGCTAAGACTACTAAGAAGGTTGTTTTAAGATTAGAATGTGTTAACTGTAAGACTAAGGCCCAATTAACCTTAAAGAGATGTAAGCATTTCGAATTAGGTGGTGAAAAGAAGCAA…	ATGCGTCTGAAAAAGTTGGAAAATTTCAGCCATTATACGCTGCAAACACAGAGAGTTAGTAGTAGTGAGGAGGAGAGATTCTGCACACATGTGCAGGATTCAGTGATTAACGTTCCAAAGACTAGAAAGACCTACTGTAAGGGTAAGGAATGTCGTAAGCACACTCAACACAAGGTTACCCAATACAAGGCTGGTAAGGCTTCCTTATTTGCCCAAGGTAAGAGACGTTATGACCGTAAACAATCCGGTTTCGGTGGTCAAACCAAGCCAGTTTTCCACAAGAAAGCTAAGACTACTAAGAAGGTTGTTTTAAGATTAGAATGTGTTAACTGTAAGACTAAGGCCCAATTAACCTTAAAGAGATGTAAGCATTTCGAATTAGGTGGTGAAAAGAAGCAA…	253		253	GGTGGTCAAACCAAG	VALID	CCA	Proline
yHDO568_nakaseomyces_sp_190924_g005444.m1	4236	ATGGTTAACGTTCCAAAGACTAGAAAGACCTACTGCAAGGGTAAGACCTGTCGTAAGCACACTCAACACAAGGTTACCCAATACAAGGCTGGTAAGGCTTCCTTGTTCGCTCAAGGTAAGAGACGTTATGACCGTAAGCAATCTGGTTTCGGTGGTCAAACCAAGCCTGTTTTCCACAAGAAAGCTAAGACTACCAAGAAGGTTGTTTTGAGATTGGAATGTGTTGCCTGTAAGACCAAGGCTCAATTGACCTTGAAGAGATGTAAGCACTTCGAATTGGGTGGTGAAAAGAAGCAAAAGGGTCAAGCTTTGCAATTCTGA	ATGGTTAACGTTCCAAAGACTAGAAAGACCTACTGCAAGGGTAAGACCTGTCGTAAGCACACTCAACACAAGGTTACCCAATACAAGGCTGGTAAGGCTTCCTTGTTCGCTCAAGGTAAGAGACGTTATGACCGTAAGCAATCTGGTTTCGGTGGTCAAACCAAGCCTGTTTTCCACAAGAAAGCTAAGACTACCAAGAAGGTTGTTTTGAGATTGGAATGTGTTGCCTGTAAGACCAAGGCTCAATTGACCTTGAAGAGATGTAAGCACTTCGAATTGGGTGGTGAAAAGAAGCAAAAGGGTCAAGCTTTGCAATTCTGA	151		151	GGTGGTCAAACCAAG	VALID	CCT	Proline
yHMPu5000034725_candida_bracarensis_160928_g001689.m1	4236	ATGGTTAACGTTCCAAAGACTAGAAAGACCTACTGCAAGGGTAAGACCTGTCGTAAGCACACTCAACACAAGGTTACCCAATACAAGGCTGGTAAGGCTTCCTTGTTCGCTCAAGGTAAGAGACGTTATGACCGTAAGCAATCTGGTTTCGGTGGTCAAACCAAGCCTGTTTTCCACAAGAAAGCTAAGACTACCAAGAAGGTTGTTTTGAGATTGGAATGTGTTGCCTGTAAGACCAAGGCTCAATTGACCTTGAAGAGATGTAAGCACTTCGAATTGGGTGGTGAAAAGAAGCAAAAGGGTCAAGCTTTGCAATTCTGA	ATGGTTAACGTTCCAAAGACTAGAAAGACCTACTGCAAGGGTAAGACCTGTCGTAAGCACACTCAACACAAGGTTACCCAATACAAGGCTGGTAAGGCTTCCTTGTTCGCTCAAGGTAAGAGACGTTATGACCGTAAGCAATCTGGTTTCGGTGGTCAAACCAAGCCTGTTTTCCACAAGAAAGCTAAGACTACCAAGAAGGTTGTTTTGAGATTGGAATGTGTTGCCTGTAAGACCAAGGCTCAATTGACCTTGAAGAGATGTAAGCACTTCGAATTGGGTGGTGAAAAGAAGCAAAAGGGTCAAGCTTTGCAATTCTGA	151		151	GGTGGTCAAACCAAG	VALID	CCT	Proline
yHMPu5000034957_Hanseniaspora_osmophila_SPADES_g001006.m1	4236	ATGGTTAACGTTCCAAAAACCAGAAAAACTTATTGCAAGGGTAAAACTTGTAGAAAACATACTCAACACAAAGTTACCCAATACAAAGCTGGTAAAGCTTCTTTGTTTGCCCAAGGTAAAAGAAGATATGACAGAAAACAAAGTGGTTTCGGTGGTCAAACCAAACCGGTTTTCCACAAAAAGGCTAAAACTACCAAAAAAGTTGTTTTGAGATTGGAATGTGTTGCTTGCAAAACCAAAGCTCAATTGACTTTGAAAAGATGTAAACATTTTGAATTGGGTGGTGAAAAAAAACAAAAAGGTCAAGCTCTACAATTTTAA	ATGGTTAACGTTCCAAAAACCAGAAAAACTTATTGCAAGGGTAAAACTTGTAGAAAACATACTCAACACAAAGTTACCCAATACAAAGCTGGTAAAGCTTCTTTGTTTGCCCAAGGTAAAAGAAGATATGACAGAAAACAAAGTGGTTTCGGTGGTCAAACCAAACCGGTTTTCCACAAAAAGGCTAAAACTACCAAAAAAGTTGTTTTGAGATTGGAATGTGTTGCTTGCAAAACCAAAGCTCAATTGACTTTGAAAAGATGTAAACATTTTGAATTGGGTGGTGAAAAAAAACAAAAAGGTCAAGCTCTACAATTTTAA	151		151	GGTGGTCAAACCAAA	VALID	CCG	Proline
yHMPu5000034720_candida_nivariensis_180604_g003894.m1	4236	ATGGTTAACGTTCCAAAGACTAGAAAGACCTACTGCAAGGGTAAGAACTGTCGTAAGCACACTCAACACAAGGTTACCCAATACAAGGCTGGTAAGGCTTCCTTGTTCGCTCAAGGTAAGAGACGTTATGACCGTAAGCAATCTGGTTTCGGTGGTCAAACCAAGCCTGTTTTCCACAAGAAAGCTAAGACTACCAAGAAGGTTGTTTTGAGATTGGAATGTGTTGCCTGTAAGACCAAGGCTCAATTGACCTTGAAGAGATGTAAGCACTTCGAATTGGGTGGTGAAAAGAAGCAAAAGGGTCAAGCTTTGCAATTCTGA	ATGGTTAACGTTCCAAAGACTAGAAAGACCTACTGCAAGGGTAAGAACTGTCGTAAGCACACTCAACACAAGGTTACCCAATACAAGGCTGGTAAGGCTTCCTTGTTCGCTCAAGGTAAGAGACGTTATGACCGTAAGCAATCTGGTTTCGGTGGTCAAACCAAGCCTGTTTTCCACAAGAAAGCTAAGACTACCAAGAAGGTTGTTTTGAGATTGGAATGTGTTGCCTGTAAGACCAAGGCTCAATTGACCTTGAAGAGATGTAAGCACTTCGAATTGGGTGGTGAAAAGAAGCAAAAGGGTCAAGCTTTGCAATTCTGA	151		151	GGTGGTCAAACCAAG	VALID	CCT	Proline
yHMPu5000034875_tetrapisispora_fleetii_160519_g003388.m1	4236	ATGGTTAACGTTCCAAAGACCAGAAAGACTTACTGTAAGGGTAAGAACTGTAGAAAACACACCCAACACAAGGTTACCCAATACAAAGCTGGTAAGGCCTCTTTGTTCGCTCAAGGTAAGAGACGTTATGACCGTAAACAATCTGGTTTCGGTGGTCAAACTAAGCCAGTTTTCCACAAGAAAGCTAAGACTACCAAGAAAGTTGTTTTAAGATTAGAATGTGTCGCTTGTAAGACTAAGGCTCAATTAACCTTAAAGAGATGTAAGCACTTCGAATTAGGTGGTGAAAAGAAACAAAAGGGTCAAGCTTTACAATTCTAA	ATGGTTAACGTTCCAAAGACCAGAAAGACTTACTGTAAGGGTAAGAACTGTAGAAAACACACCCAACACAAGGTTACCCAATACAAAGCTGGTAAGGCCTCTTTGTTCGCTCAAGGTAAGAGACGTTATGACCGTAAACAATCTGGTTTCGGTGGTCAAACTAAGCCAGTTTTCCACAAGAAAGCTAAGACTACCAAGAAAGTTGTTTTAAGATTAGAATGTGTCGCTTGTAAGACTAAGGCTCAATTAACCTTAAAGAGATGTAAGCACTTCGAATTAGGTGGTGAAAAGAAACAAAAGGGTCAAGCTTTACAATTCTAA	151		151	GGTGGTCAAACTAAG	VALID	CCA	Proline
yHMPu5000035655_tetrapisispora_taiwanensis_160613_g000140.m1	4236	ATGGTTAACGTTCCAAAGACCAGAAAGACCTACTGTAAGGGTAAGAACTGTAGAAAGCACACTCAACACAAAGTCACCCAATACAAAGCTGGTAAGGCCTCTTTGTTCGCTCAAGGTAAGAGACGTTATGACCGTAAACAATCTGGTTTCGGTGGTCAAACTAAGCCAGTTTTCCACAAGAAAGCTAAGACTACCAAGAAAGTTGTTTTAAGATTAGAATGTGTCGCTTGTAAGACCAAGGCCCAATTAACCTTAAAGAGATGTAAGCACTTCGAATTAGGTGGTGAAAAGAAACAAAAGGGTCAAGCTTTACAATTTTAA	ATGGTTAACGTTCCAAAGACCAGAAAGACCTACTGTAAGGGTAAGAACTGTAGAAAGCACACTCAACACAAAGTCACCCAATACAAAGCTGGTAAGGCCTCTTTGTTCGCTCAAGGTAAGAGACGTTATGACCGTAAACAATCTGGTTTCGGTGGTCAAACTAAGCCAGTTTTCCACAAGAAAGCTAAGACTACCAAGAAAGTTGTTTTAAGATTAGAATGTGTCGCTTGTAAGACCAAGGCCCAATTAACCTTAAAGAGATGTAAGCACTTCGAATTAGGTGGTGAAAAGAAACAAAAGGGTCAAGCTTTACAATTTTAA	151		151	GGTGGTCAAACTAAG	VALID	CCA	Proline
yHMPu5000035656_Tetrapisispora_pingtungensis_SPADES_g002911.m1	4236	ATGGTTAACGTTCCAAAGACCAGAAAGACCTACTGTAAGGGTAAGAACTGTAGAAAGCACACTCAACACAAAGTCACCCAATACAAAGCTGGTAAGGCCTCTTTGTTCGCTCAAGGTAAGAGACGTTATGACCGTAAACAATCTGGTTTCGGTGGTCAAACTAAGCCAGTTTTCCACAAGAAAGCTAAGACTACCAAGAAAGTTGTTTTAAGATTAGAATGTGTCGCTTGTAAGACCAAGGCCCAATTAACCTTAAAGAGATGTAAGCACTTCGAATTAGGTGGTGAAAAGAAACAAAAGGGTCAAGCTTTACAATTTTAA	ATGGTTAACGTTCCAAAGACCAGAAAGACCTACTGTAAGGGTAAGAACTGTAGAAAGCACACTCAACACAAAGTCACCCAATACAAAGCTGGTAAGGCCTCTTTGTTCGCTCAAGGTAAGAGACGTTATGACCGTAAACAATCTGGTTTCGGTGGTCAAACTAAGCCAGTTTTCCACAAGAAAGCTAAGACTACCAAGAAAGTTGTTTTAAGATTAGAATGTGTCGCTTGTAAGACCAAGGCCCAATTAACCTTAAAGAGATGTAAGCACTTCGAATTAGGTGGTGAAAAGAAACAAAAGGGTCAAGCTTTACAATTTTAA	151		151	GGTGGTCAAACTAAG	VALID	CCA	Proline
yHMPu5000034868_Vanderwaltozyma_yarrowii_S33_SPADES_g001326.m1	4236	ATGGTTAACGTTCCAAAGACCAGAAAGACCTACTGTAAGGGTAAGAACTGTCGTAAACACACTCAACACAAAGTTACCCAATACAAAGCTGGTAAGGCTTCTTTGTTTGCTCAAGGTAAGAGACGTTATGACCGTAAACAATCTGGTTTCGGTGGTCAAACTAAGCCAGTTTTCCACAAGAAAGCTAAGACTACAAAGAAGGTTGTTTTGAGATTAGAATGTGTTGCTTGTAAGACTAAAGCTCAATTGACTTTGAAGAGATGTAAGCACTTCGAATTAGGTGGTGAAAGAAAACAAAAGGGTCAAGCTTTACAATTTTAA	ATGGTTAACGTTCCAAAGACCAGAAAGACCTACTGTAAGGGTAAGAACTGTCGTAAACACACTCAACACAAAGTTACCCAATACAAAGCTGGTAAGGCTTCTTTGTTTGCTCAAGGTAAGAGACGTTATGACCGTAAACAATCTGGTTTCGGTGGTCAAACTAAGCCAGTTTTCCACAAGAAAGCTAAGACTACAAAGAAGGTTGTTTTGAGATTAGAATGTGTTGCTTGTAAGACTAAAGCTCAATTGACTTTGAAGAGATGTAAGCACTTCGAATTAGGTGGTGAAAGAAAACAAAAGGGTCAAGCTTTACAATTTTAA	151		151	GGTGGTCAAACTAAG	VALID	CCA	Proline
yHMPu5000034959_hanseniaspora_occidentalis_var_occidentalis_170307_g004914.m1	4236	ATGGTTAACGTTCCAAAAACCAGAAAGACCTATTGCAAGGGTAAAAACTGTAGAAAACACACCCAACACAAAGTTACCCAATACAAAGCTGGTAAAGCTTCTTTGTTCGCTCAAGGTAAAAGAAGATATGACAGAAAACAAAGTGGTTTCGGTGGTCAAACTAAACCAGTTTTCCACAAGAAAGCTAAAACTACCAAAAAAGTTGTTTTGAGATTGGAATGTGTTGCCTGTAAAACCAAAGCTCAATTGACTTTGAAAAGATGTAAACATTTCGAATTGGGTGGTGAAAGAAAACAAAAAGGTCAAGCTTTGCAATTTTAA	ATGGTTAACGTTCCAAAAACCAGAAAGACCTATTGCAAGGGTAAAAACTGTAGAAAACACACCCAACACAAAGTTACCCAATACAAAGCTGGTAAAGCTTCTTTGTTCGCTCAAGGTAAAAGAAGATATGACAGAAAACAAAGTGGTTTCGGTGGTCAAACTAAACCAGTTTTCCACAAGAAAGCTAAAACTACCAAAAAAGTTGTTTTGAGATTGGAATGTGTTGCCTGTAAAACCAAAGCTCAATTGACTTTGAAAAGATGTAAACATTTCGAATTGGGTGGTGAAAGAAAACAAAAAGGTCAAGCTTTGCAATTTTAA	151		151	GGTGGTCAAACTAAA	VALID	CCA	Proline
yHMPu5000034876_Tetrapisispora_iriomotensis_SPADES_g000890.m1	4236	ATGGTTAACGTTCCAAAGACCAGAAAGACCTACTGTAAGGGTAAGAACTGTAGAAAGCACACTCAACACAAAGTTACCCAATACAAAGCTGGTAAGGCTTCTTTGTTCGCTCAAGGTAAGAGACGTTATGACCGTAAACAAGCTGGTTTCGGTGGTCAAACTAAGCCAGTTTTCCACAAGAAAGCTAAGACTACCAAGAAAGTTGTTTTAAGATTAGAATGTGTTGCTTGTAAGACCAAGGCTCAATTGACCTTAAAGAGATGTAAGCACTTCGAATTAGGTGGTGAAAAGAAGCAAAAGGGTCAAGCTTTACAATTTTAA	ATGGTTAACGTTCCAAAGACCAGAAAGACCTACTGTAAGGGTAAGAACTGTAGAAAGCACACTCAACACAAAGTTACCCAATACAAAGCTGGTAAGGCTTCTTTGTTCGCTCAAGGTAAGAGACGTTATGACCGTAAACAAGCTGGTTTCGGTGGTCAAACTAAGCCAGTTTTCCACAAGAAAGCTAAGACTACCAAGAAAGTTGTTTTAAGATTAGAATGTGTTGCTTGTAAGACCAAGGCTCAATTGACCTTAAAGAGATGTAAGCACTTCGAATTAGGTGGTGAAAAGAAGCAAAAGGGTCAAGCTTTACAATTTTAA	151		151	GGTGGTCAAACTAAG	VALID	CCA	Proline
yHMPu5000034873_tetrapisipora_arboricola_ABYSS_g005008.m1	4236	ATGATTTTTGATGCAGTTAACGTTCCAAAGACCAGAAAGACCTACTGTAAGGGTAAGAACTGTAGAAAGCATACTCAACACAAAGTTACCCAATACAAAGCTGGTAAGGCTTCTTTGTTTGCTCAAGGTAAGAGACGTTATGACCGTAAACAAGCTGGTTTCGGTGGTCAAACTAAGCCAGTTTTCCACAAGAAAGCTAAGACTACCAAGAAAGTTGTTTTAAGATTAGAATGTGTCGCTTGTAAGACCAAGGCTCAATTAACCTTAAAGAGATGTAAGCACTTCGAATTAGGTGGTGAAAAGAAGCAAAAGGGTCAAGCTTTACAATTTTAA	ATGATTTTTGATGCAGTTAACGTTCCAAAGACCAGAAAGACCTACTGTAAGGGTAAGAACTGTAGAAAGCATACTCAACACAAAGTTACCCAATACAAAGCTGGTAAGGCTTCTTTGTTTGCTCAAGGTAAGAGACGTTATGACCGTAAACAAGCTGGTTTCGGTGGTCAAACTAAGCCAGTTTTCCACAAGAAAGCTAAGACTACCAAGAAAGTTGTTTTAAGATTAGAATGTGTCGCTTGTAAGACCAAGGCTCAATTAACCTTAAAGAGATGTAAGCACTTCGAATTAGGTGGTGAAAAGAAGCAAAAGGGTCAAGCTTTACAATTTTAA	163		163	GGTGGTCAAACTAAG	VALID	CCA	Proline
yHMPu5000034878_tetrapisispora_nanseiensis_160519_g006132.m1	4236	ATGGACAAGTATGATACAGTTAACGTTCCAAAGACCAGAAAGACCTACTGTAAGGGTAAGAACTGTAGAAAGCACACTCAACACAAAGTTACCCAATACAAAGCTGGTAAGGCTTCTTTGTTCGCTCAAGGTAAGAGACGTTATGACCGTAAACAATCTGGTTTCGGTGGTCAAACTAAGCCAGTTTTCCACAAGAAAGCTAAGACTACCAAGAAAGTTGTTTTAAGATTAGAATGTGTCGCTTGTAAGACTAAGGCCCAATTAACCTTAAAGAGATGTAAGCACTTCGAATTAGGTGGTGAAAAGAAACAAAAGGGTCAAGCTTTACAATTTTAA	ATGGACAAGTATGATACAGTTAACGTTCCAAAGACCAGAAAGACCTACTGTAAGGGTAAGAACTGTAGAAAGCACACTCAACACAAAGTTACCCAATACAAAGCTGGTAAGGCTTCTTTGTTCGCTCAAGGTAAGAGACGTTATGACCGTAAACAATCTGGTTTCGGTGGTCAAACTAAGCCAGTTTTCCACAAGAAAGCTAAGACTACCAAGAAAGTTGTTTTAAGATTAGAATGTGTCGCTTGTAAGACTAAGGCCCAATTAACCTTAAAGAGATGTAAGCACTTCGAATTAGGTGGTGAAAAGAAACAAAAGGGTCAAGCTTTACAATTTTAA	166		166	GGTGGTCAAACTAAG	VALID	CCA	Proline
yHMPu5000026127_nakaseomyces_delphensis_160519_g005069.m1	4236	ATGCAAGGTAATACAATAAGTGTTAACGTTCCAAAGACTAGAAAGACCTACTGCAAGGGTAAGACCTGTCGTAAGCACACTCAACACAAGGTTACCCAATACAAGGCTGGTAAGGCTTCCTTGTTCGCTCAAGGTAAGAGACGTTATGACCGTAAGCAATCTGGTTTCGGTGGTCAAACCAAGCCTGTTTTCCACAAGAAAGCTAAGACTACCAAGAAGGTTGTTTTGAGATTGGAATGTGTTGCCTGTAAGACCAAGGCTCAATTGACCTTGAAGAGATGTAAGCACTTCGAATTGGGTGGTGAAAAGAAGCAAAAGGGTCAAGCTTTGCAATTCTGA	ATGCAAGGTAATACAATAAGTGTTAACGTTCCAAAGACTAGAAAGACCTACTGCAAGGGTAAGACCTGTCGTAAGCACACTCAACACAAGGTTACCCAATACAAGGCTGGTAAGGCTTCCTTGTTCGCTCAAGGTAAGAGACGTTATGACCGTAAGCAATCTGGTTTCGGTGGTCAAACCAAGCCTGTTTTCCACAAGAAAGCTAAGACTACCAAGAAGGTTGTTTTGAGATTGGAATGTGTTGCCTGTAAGACCAAGGCTCAATTGACCTTGAAGAGATGTAAGCACTTCGAATTGGGTGGTGAAAAGAAGCAAAAGGGTCAAGCTTTGCAATTCTGA	169		169	GGTGGTCAAACCAAG	VALID	CCT	Proline
yHMPu5000034718_candida_uthaithanina_180604_g001440.m1	4236	ATGCCGAGTTTTGTTGTGGTGCTGGTATCCATTAACGTTCCAAAGACTAGAAAGACCTACTGCAAGGGTAAGACCTGTCGTAAGCACACCCAACACAAGGTTACCCAATACAAGGCTGGTAAGGCTTCCTTGTTCGCTCAAGGTAAGAGACGTTATGACCGTAAGCAATCTGGTTTCGGTGGTCAAACCAAGCCTGTTTTCCACAAGAAAGCTAAGACTACCAAGAAGGTTGTCTTGAGATTGGAATGTGTTGCCTGCAAGACCAAGGCTCAATTGACCTTGAAGAGATGTAAGCACTTCGAATTGGGTGGTGAGAAGAAGCAAAAGGGTCAAGCTTTGCAATTCTGA	ATGCCGAGTTTTGTTGTGGTGCTGGTATCCATTAACGTTCCAAAGACTAGAAAGACCTACTGCAAGGGTAAGACCTGTCGTAAGCACACCCAACACAAGGTTACCCAATACAAGGCTGGTAAGGCTTCCTTGTTCGCTCAAGGTAAGAGACGTTATGACCGTAAGCAATCTGGTTTCGGTGGTCAAACCAAGCCTGTTTTCCACAAGAAAGCTAAGACTACCAAGAAGGTTGTCTTGAGATTGGAATGTGTTGCCTGCAAGACCAAGGCTCAATTGACCTTGAAGAGATGTAAGCACTTCGAATTGGGTGGTGAGAAGAAGCAAAAGGGTCAAGCTTTGCAATTCTGA	178		178	GGTGGTCAAACCAAG	VALID	CCT	Proline
yHMPu5000034580_tetrapisispora_phaffii_180604_g000150.m1	4236	ATGTGTTTTCGATGTAAGTTGATTGTTATTTTATTTAATGAACTTTTCAATACAGTTAACGTTCCAAAGACCAGAAAGACATACTGTAAGGGTAAGAGCTGTAGAAAGCACACTCAACACAAGGTTACCCAATACAAAGCTGGTAAGGCCTCTTTGTTCGCTCAAGGTAAGAGACGTTATGACCGTAAACAAGCCGGTTTCGGTGGTCAAACTAAGCCAGTTTTCCACAAGAAAGCTAAGACTACCAAGAAAGTTGTTTTAAGATTAGAATGTGTCGCTTGCAAGACCAAGGCTCAATTAACCTTAAAGAGATGTAAGCACTTCGAATTAGGTGGTGAAAAGAAGCAAAAGGGTCAAGCTTTACAATTTTAA	ATGTGTTTTCGATGTAAGTTGATTGTTATTTTATTTAATGAACTTTTCAATACAGTTAACGTTCCAAAGACCAGAAAGACATACTGTAAGGGTAAGAGCTGTAGAAAGCACACTCAACACAAGGTTACCCAATACAAAGCTGGTAAGGCCTCTTTGTTCGCTCAAGGTAAGAGACGTTATGACCGTAAACAAGCCGGTTTCGGTGGTCAAACTAAGCCAGTTTTCCACAAGAAAGCTAAGACTACCAAGAAAGTTGTTTTAAGATTAGAATGTGTCGCTTGCAAGACCAAGGCTCAATTAACCTTAAAGAGATGTAAGCACTTCGAATTAGGTGGTGAAAAGAAGCAAAAGGGTCAAGCTTTACAATTTTAA	202		202	GGTGGTCAAACTAAG	VALID	CCA	Proline
yHMPu5000034880_torulaspora_globosa_160519_g000081.m1	4236	ATGCCAGTAAGCCAAAACCTGGGAACAATTAACGTTCCAAAGACCAGAAAGACCTACTGTAAGGGTAAGGCCTGCCGTAAGCACACTCAGCACAAGGTTACCCAATACAAGGCTGGTAAGGCTTCCTTGTTCGCTCAAGGTAAGAGACGTTATGACCGTAAACAATCCGGTTTCGGTGGTCAAACCAAGCCAGTTTTCCACAAGAAGGCTAAGACCACCAAGAAGGTCGTGTTGAGATTGGAATGTGTTGCTTGCAAGACCAAAGCCCAATTGACTTTGAAGAGATGTAAGCACTTCGAATTGGGTGGTGAGAAGAAGCAAAAGGGTCAAGCTCTGCAATTCTGA	ATGCCAGTAAGCCAAAACCTGGGAACAATTAACGTTCCAAAGACCAGAAAGACCTACTGTAAGGGTAAGGCCTGCCGTAAGCACACTCAGCACAAGGTTACCCAATACAAGGCTGGTAAGGCTTCCTTGTTCGCTCAAGGTAAGAGACGTTATGACCGTAAACAATCCGGTTTCGGTGGTCAAACCAAGCCAGTTTTCCACAAGAAGGCTAAGACCACCAAGAAGGTCGTGTTGAGATTGGAATGTGTTGCTTGCAAGACCAAAGCCCAATTGACTTTGAAGAGATGTAAGCACTTCGAATTGGGTGGTGAGAAGAAGCAAAAGGGTCAAGCTCTGCAATTCTGA	175		175	GGTGGTCAAACCAAG	VALID	CCA	Proline
yHMPu5000034881_Torulaspora_pretoriensis_SPADES_g001511.m1	4236	ATGTTTCCGCCACGCTTTGCCTGGCCGGAGGACCACGCTGATTCCAGACAGAGGTCCTGTCTAGCTCCTTCACTGATTCTGCTGGGTTTCTCGATTCCGCAGCGGTGGGTCTGCCTAGGGACATTCTGCCTAGACAGGCCAGATTGCGACAGCAGTCTGCTAGGAGCTACTGGACTGACGGAATCCCAGCTCACACACGGGCAGTTGCACCAAGCAAGAAAACAGATCAGTCGCAATGGGTATGTGGAGAATAGTGGTGGAATGGTCAGTTACGTCAAGAGAACTAGCGTGACTATCAATTTCCGTTACCAGTTCAAATTACTAACAGCCAAGTTTCCTACAGTTAACGTTCCAAAGACCAGAAAGACCTACTGTAAGGGTAAGGCCTGCCGTAAGCAC…	ATGTTTCCGCCACGCTTTGCCTGGCCGGAGGACCACGCTGATTCCAGACAGAGGTCCTGTCTAGCTCCTTCACTGATTCTGCTGGGTTTCTCGATTCCGCAGCGGTGGGTCTGCCTAGGGACATTCTGCCTAGACAGGCCAGATTGCGACAGCAGTCTGCTAGGAGCTACTGGACTGACGGAATCCCAGCTCACACACGGGCAGTTGCACCAAGCAAGAAAACAGATCAGTCGCAATGGGTATGTGGAGAATAGTGGTGGAATGGTCAGTTACGTCAAGAGAACTAGCGTGACTATCAATTTCCGTTACCAGTTCAAATTACTAACAGCCAAGTTTCCTACAGTTAACGTTCCAAAGACCAGAAAGACCTACTGTAAGGGTAAGGCCTGCCGTAAGCAC…	490		490	GGTGGTCAAACCAAG	VALID	CCT	Proline
yHMPu5000026152_Torulaspora_franciscae_SPADES_g003830.m1	4236	ATGGGTATGTGGAGAAATAGTGGTGGAATAGCGCAGTTACGTCAAGAGAACCGGTTCGTGATCCTGAAGGAAGAGAATACAAAGTTCAAATTACTAACAGTCGAATTACCTGCAGTTAACGTTCCAAAGACCAGAAAGACCTACTGTAAGGGTAAGGCCTGCCGTAAGCACACTCAGCACAAGGTTACCCAATACAAGGCCGGTAAGGCTTCCTTGTTCGCTCAAGGTAAGAGACGTTATGACCGTAAACAATCTGGTTTCGGTGGTCAAACCAAGCCAGTTTTCCACAAGAAAGCCAAGACTACCAAGAAGGTCGTTTTGAGATTGGAATGTGTCGCTTGCAAGACCAGAGCTCAATTGACTTTGAAGAGATGTAAGCACTTCGAATTGGGTGGTGAA…	ATGGGTATGTGGAGAAATAGTGGTGGAATAGCGCAGTTACGTCAAGAGAACCGGTTCGTGATCCTGAAGGAAGAGAATACAAAGTTCAAATTACTAACAGTCGAATTACCTGCAGTTAACGTTCCAAAGACCAGAAAGACCTACTGTAAGGGTAAGGCCTGCCGTAAGCACACTCAGCACAAGGTTACCCAATACAAGGCCGGTAAGGCTTCCTTGTTCGCTCAAGGTAAGAGACGTTATGACCGTAAACAATCTGGTTTCGGTGGTCAAACCAAGCCAGTTTTCCACAAGAAAGCCAAGACTACCAAGAAGGTCGTTTTGAGATTGGAATGTGTCGCTTGCAAGACCAGAGCTCAATTGACTTTGAAGAGATGTAAGCACTTCGAATTGGGTGGTGAA…	262		262	GGTGGTCAAACCAAG	VALID	CCA	Proline
yHAB161_kazachstania_sinensis_160519_g001687.m1	4236	ATGATACTGTGTATCACAAACACCAAATATAAGAGCCTGTTTTCTTCTTTTATTTCCTCAGTTAACGTTCCAAAGACTAGAAAGACCTACTGTAAGGGTAAGGCCTGCCGTAAGCACACCCAACACAAGGTTACCCAATACAAGGCTGGTAAGGCTTCCCTGTTCGCTCAAGGTAAGAGACGTTACGACCGGAAGCAATCCGGTTTCGGTGGTCAAACCAAGCCTGTTTTCCACAAGAAAGCCAAGACCACCAAGAAGGTTGTCTTGAGATTGGAATGTGTCGCTTGTAAGACCAGAGCCCAATTGACTTTGAAGAGATGTAAGCATTTCGAATTGGGTGGTGAAAAGAAGCAAAAGGGTGCTGCTCTACAATTCTGA	ATGATACTGTGTATCACAAACACCAAATATAAGAGCCTGTTTTCTTCTTTTATTTCCTCAGTTAACGTTCCAAAGACTAGAAAGACCTACTGTAAGGGTAAGGCCTGCCGTAAGCACACCCAACACAAGGTTACCCAATACAAGGCTGGTAAGGCTTCCCTGTTCGCTCAAGGTAAGAGACGTTACGACCGGAAGCAATCCGGTTTCGGTGGTCAAACCAAGCCTGTTTTCCACAAGAAAGCCAAGACCACCAAGAAGGTTGTCTTGAGATTGGAATGTGTCGCTTGTAAGACCAGAGCCCAATTGACTTTGAAGAGATGTAAGCATTTCGAATTGGGTGGTGAAAAGAAGCAAAAGGGTGCTGCTCTACAATTCTGA	208		208	GGTGGTCAAACCAAG	VALID	CCT	Proline
yHAB147_kazachstania_taianensis_160519_g005193.m1	4236	ATGAGCGATAACGATGTGAAGGCCAAAACCACTGATAAAATACCTGAAGAGGATACGGTCAAATGCCCCGACTGCGGCAGTATTTTGCAAAAATGTCTCGTACAACAAAACTACGCGATGGTTATATGTCCTAGCGAGACATGTGGCTATCCATTTAATCAGCATGAAATCATAGACAACTTAGTATATGTTGATGATTCTGACGTGTTGGAGAGCGCCAAGGAACGGCTATCGAAAATTAACGTTCCAAAGACTAGAAAGACCTACTGTAAGGGTAAGGCTTGCCGTAAGCACACTCAACACAAGGTTACCCAATACAAGGCTGGTAAGGCTTCCTTATTTGCCCAAGGTAAGAGACGTTATGACCGTAAACAATCCGGTTTCGGTGGTCAAACCAAG…	ATGAGCGATAACGATGTGAAGGCCAAAACCACTGATAAAATACCTGAAGAGGATACGGTCAAATGCCCCGACTGCGGCAGTATTTTGCAAAAATGTCTCGTACAACAAAACTACGCGATGGTTATATGTCCTAGCGAGACATGTGGCTATCCATTTAATCAGCATGAAATCATAGACAACTTAGTATATGTTGATGATTCTGACGTGTTGGAGAGCGCCAAGGAACGGCTATCGAAAATTAACGTTCCAAAGACTAGAAAGACCTACTGTAAGGGTAAGGCTTGCCGTAAGCACACTCAACACAAGGTTACCCAATACAAGGCTGGTAAGGCTTCCTTATTTGCCCAAGGTAAGAGACGTTATGACCGTAAACAATCCGGTTTCGGTGGTCAAACCAAG…	385		385	GGTGGTCAAACCAAG	VALID	CCT	Proline
yHAB142_kazachstania_gamospora_170307.haplomerger2_g000050.m1	4236	ATGGTTAACGTTCCAAAGACTAGAAAGACTTACTGTAAGGGTAAGAACTGTAGAAAACATACTCAACACAAAGTTACCCAATACAAAGCTGGTAAGGCATCTTTATTTGCTCAAGGTAAGAGACGTTATGACCGTAAACAATCTGGTTTTGGTGGTCAAACTAAACCAGTTTTCCACAAGAAAGCTAAGACTACAAAGAAAGTTGTTTTAAGATTAGAATGTGTTAGTTGTAAGACTAAAGCTCAATTAGTCTTAAAGAGATGTAAGCATTTTGAATTAGGTGGTGAAAAGAAACAAAAGGGTGCTGCTTTACAATTTTAA	ATGGTTAACGTTCCAAAGACTAGAAAGACTTACTGTAAGGGTAAGAACTGTAGAAAACATACTCAACACAAAGTTACCCAATACAAAGCTGGTAAGGCATCTTTATTTGCTCAAGGTAAGAGACGTTATGACCGTAAACAATCTGGTTTTGGTGGTCAAACTAAACCAGTTTTCCACAAGAAAGCTAAGACTACAAAGAAAGTTGTTTTAAGATTAGAATGTGTTAGTTGTAAGACTAAAGCTCAATTAGTCTTAAAGAGATGTAAGCATTTTGAATTAGGTGGTGAAAAGAAACAAAAGGGTGCTGCTTTACAATTTTAA	151		151	GGTGGTCAAACTAAA	VALID	CCA	Proline
yHAB145_kazachstania_hellenica_160519.haplomerger2_g001414.m1	4236	ATGGTTAACGTTCCAAAGACTAGAAAGACTTACTGTAAGGGTAAGAACTGTAGAAAGCATACTCAACACAAGGTTACCCAATACAAGGCTGGTAAGGCTTCTTTATTTGCTCAAGGTAAGAGACGTTATGACCGTAAACAATCTGGTTTTGGTGGTCAAACTAAGCCAGTTTTCCACAAGAAAGCTAAGACTACCAAGAAGGTTGTTTTAAGATTAGAATGTGTTAGCTGTAAGACTAAGGCCCAATTAGTCTTAAAGAGATGTAAGCACTTCGAATTAGGTGGTGAAAAGAAGCAAAAGGGTGCCGCTTTACAATTTTAA	ATGGTTAACGTTCCAAAGACTAGAAAGACTTACTGTAAGGGTAAGAACTGTAGAAAGCATACTCAACACAAGGTTACCCAATACAAGGCTGGTAAGGCTTCTTTATTTGCTCAAGGTAAGAGACGTTATGACCGTAAACAATCTGGTTTTGGTGGTCAAACTAAGCCAGTTTTCCACAAGAAAGCTAAGACTACCAAGAAGGTTGTTTTAAGATTAGAATGTGTTAGCTGTAAGACTAAGGCCCAATTAGTCTTAAAGAGATGTAAGCACTTCGAATTAGGTGGTGAAAAGAAGCAAAAGGGTGCCGCTTTACAATTTTAA	151		151	GGTGGTCAAACTAAG	VALID	CCA	Proline
yHAB145_kazachstania_hellenica_160519.haplomerger2_g001262.m1	4236	ATGGTTAACGTTCCAAAAACTAGAAAGACCTACTGTAAGGGTAAGAACTGTAGAAAGCACACCCAGCACAAGGTTACCCAATACAAGGCTGGTAAGGCTTCTTTATTTGCTCAAGGTAAGAGACGTTATGACCGTAAACAATCCGGTTTCGGTGGTCAAACCAAGCCAGTTTTCCACAAGAAAGCTAAGACTACCAAGAAGGTTGTTTTAAGATTAGAATGTGTTAGCTGTAAGACTAAGGCTCAATTAGTCTTAAAGAGATGTAAGCACTTCGAATTAGGTGGTGAAAAGAAGCAAAAGGGTGCCGCTTTACAATTTTAA	ATGGTTAACGTTCCAAAAACTAGAAAGACCTACTGTAAGGGTAAGAACTGTAGAAAGCACACCCAGCACAAGGTTACCCAATACAAGGCTGGTAAGGCTTCTTTATTTGCTCAAGGTAAGAGACGTTATGACCGTAAACAATCCGGTTTCGGTGGTCAAACCAAGCCAGTTTTCCACAAGAAAGCTAAGACTACCAAGAAGGTTGTTTTAAGATTAGAATGTGTTAGCTGTAAGACTAAGGCTCAATTAGTCTTAAAGAGATGTAAGCACTTCGAATTAGGTGGTGAAAAGAAGCAAAAGGGTGCCGCTTTACAATTTTAA	151		151	GGTGGTCAAACCAAG	VALID	CCA	Proline
yHAB155_kazachstania_spencerorum_160519_g004787.m1	4236	ATGGTTAACGTTCCAAAGACTAGAAAGACCTACTGTAAGGGTAAGAATTGTCGTAAACATACCCAACATAAGGTTACCCAATATAAAGCTGGTAAAGCTTCTTTATTTGCTCAAGGTAAGAGACGTTATGATCGTAAACAATCCGGTTTCGGTGGTCAAACTAAACCAGTTTTCCACAAGAAGGCAAAGACTACTAAGAAGGTTGTCTTAAGATTAGAATGTGTTTCTTGTAAGACTAAGGCCCAATTAGTCTTAAAGAGATGTAAGCATTTTGAATTAGGTGGTGAAAAGAAGCAAAAGGGTGCCGCTCTACAATTTTAA	ATGGTTAACGTTCCAAAGACTAGAAAGACCTACTGTAAGGGTAAGAATTGTCGTAAACATACCCAACATAAGGTTACCCAATATAAAGCTGGTAAAGCTTCTTTATTTGCTCAAGGTAAGAGACGTTATGATCGTAAACAATCCGGTTTCGGTGGTCAAACTAAACCAGTTTTCCACAAGAAGGCAAAGACTACTAAGAAGGTTGTCTTAAGATTAGAATGTGTTTCTTGTAAGACTAAGGCCCAATTAGTCTTAAAGAGATGTAAGCATTTTGAATTAGGTGGTGAAAAGAAGCAAAAGGGTGCCGCTCTACAATTTTAA	151		151	GGTGGTCAAACTAAA	VALID	CCA	Proline
yHAB155_kazachstania_spencerorum_160519_g004142.m1	4236	ATGGTTAACGTTCCAAAGACTAGAAAGACTTACTGTAAGGGTAAGAACTGTAGAAAGCATACCCAACATAAGGTTACTCAATACAAAGCTGGTAAGGCTTCTTTATTTGCTCAAGGTAAGAGACGTTATGATCGTAAACAATCCGGTTTCGGTGGTCAAACTAAACCAGTTTTCCACAAGAAGGCAAAGACTACTAAGAAGGTTGTCTTAAGATTAGAATGTGTTTCTTGTAAGACTAAGGCCCAATTAGTCTTAAAGAGATGTAAGCATTTTGAATTAGGTGGTGAAAAGAAGCAAAAGGGTGCTGCTTTACAATTTTAA	ATGGTTAACGTTCCAAAGACTAGAAAGACTTACTGTAAGGGTAAGAACTGTAGAAAGCATACCCAACATAAGGTTACTCAATACAAAGCTGGTAAGGCTTCTTTATTTGCTCAAGGTAAGAGACGTTATGATCGTAAACAATCCGGTTTCGGTGGTCAAACTAAACCAGTTTTCCACAAGAAGGCAAAGACTACTAAGAAGGTTGTCTTAAGATTAGAATGTGTTTCTTGTAAGACTAAGGCCCAATTAGTCTTAAAGAGATGTAAGCATTTTGAATTAGGTGGTGAAAAGAAGCAAAAGGGTGCTGCTTTACAATTTTAA	151		151	GGTGGTCAAACTAAA	VALID	CCA	Proline
yHAB156_kazachstania_piceae_160519_g000602.m1	4236	ATGGTTAACGTTCCAAAGACTAGAAAGACTTACTGTAAGGGTAAAAACTGTCGTAAACATACCCAACACAAGGTTACTCAATACAAGGCTGGTAAGGCTTCCTTATTTGCCCAAGGTAAGAGACGTTATGACCGTAAACAATCCGGTTTCGGTGGTCAAACCAAGCCAGTTTTCCACAAGAAAGCTAAGACTACTAAGAAGGTTGTTTTAAGATTAGAGTGTGTCAGTTGTAAGACAAAGGCTCAATTAGTCTTAAAGAGATGTAAGCACTTCGAGTTAGGTGGTGAAAAGAAGCAAAAGGGTGCCGCTTTACAATTTTAA	ATGGTTAACGTTCCAAAGACTAGAAAGACTTACTGTAAGGGTAAAAACTGTCGTAAACATACCCAACACAAGGTTACTCAATACAAGGCTGGTAAGGCTTCCTTATTTGCCCAAGGTAAGAGACGTTATGACCGTAAACAATCCGGTTTCGGTGGTCAAACCAAGCCAGTTTTCCACAAGAAAGCTAAGACTACTAAGAAGGTTGTTTTAAGATTAGAGTGTGTCAGTTGTAAGACAAAGGCTCAATTAGTCTTAAAGAGATGTAAGCACTTCGAGTTAGGTGGTGAAAAGAAGCAAAAGGGTGCCGCTTTACAATTTTAA	151		151	GGTGGTCAAACCAAG	VALID	CCA	Proline
yHAB156_kazachstania_piceae_160519_g000095.m1	4236	ATGGTTAACGTTCCAAAGACTAGAAAGACCTACTGTAAGGGTAAGAACTGTCGTAAGCACACTCAACACAAAGTCACCCAATACAAAGCTGGTAAGGCTTCCTTATTTGCTCAAGGTAAGAGACGTTATGACCGTAAACAATCTGGTTTCGGTGGTCAAACCAAGCCAGTTTTCCACAAGAAAGCTAAGACTACCAAGAAGGTTGTTTTAAGATTGGAATGTGTCAGCTGTAAGACCAAGGCTCAATTAGTCTTAAAGAGATGTAAGCACTTCGAATTAGGTGGTGAAAAGAAACAAAAGGGTGCTGCTTTACAATTTTAA	ATGGTTAACGTTCCAAAGACTAGAAAGACCTACTGTAAGGGTAAGAACTGTCGTAAGCACACTCAACACAAAGTCACCCAATACAAAGCTGGTAAGGCTTCCTTATTTGCTCAAGGTAAGAGACGTTATGACCGTAAACAATCTGGTTTCGGTGGTCAAACCAAGCCAGTTTTCCACAAGAAAGCTAAGACTACCAAGAAGGTTGTTTTAAGATTGGAATGTGTCAGCTGTAAGACCAAGGCTCAATTAGTCTTAAAGAGATGTAAGCACTTCGAATTAGGTGGTGAAAAGAAACAAAAGGGTGCTGCTTTACAATTTTAA	151		151	GGTGGTCAAACCAAG	VALID	CCA	Proline
yHAB142_kazachstania_gamospora_170307.haplomerger2_g000865.m1	4236	ATGAGTTCTTCTACTAAGAAACATGATGAAATAGAGGAAGGAGAAACTAATCAAATGACACATTGTCCGGATTGTGGTACAGTTTTACAAAAATGTTTAATTCAACAAAATTATGCAATTATTGTTTGTCCCAATACGATCTGTGGATATCCTTTCAATCAAAATGCTGTATTTGATAATTTGGTTGGTTTTTTTACACTAGAAATAGAGTTGAATCAAATCAATAAAGTAAATCGATCCGTCGCAATGGTTAACGTTCCAAAGACTAGAAAGACCTACTGTAAGGGTAAGAACTGTAGAAAACACACCCAACACAAGGTTACTCAATACAAAGCTGGTAAAGCTTCTTTATTTGCTCAAGGTAAGAGACGTTATGACCGTAAACAATCTGGTTTCGGT…	ATGAGTTCTTCTACTAAGAAACATGATGAAATAGAGGAAGGAGAAACTAATCAAATGACACATTGTCCGGATTGTGGTACAGTTTTACAAAAATGTTTAATTCAACAAAATTATGCAATTATTGTTTGTCCCAATACGATCTGTGGATATCCTTTCAATCAAAATGCTGTATTTGATAATTTGGTTGGTTTTTTTACACTAGAAATAGAGTTGAATCAAATCAATAAAGTAAATCGATCCGTCGCAATGGTTAACGTTCCAAAGACTAGAAAGACCTACTGTAAGGGTAAGAACTGTAGAAAACACACCCAACACAAGGTTACTCAATACAAAGCTGGTAAAGCTTCTTTATTTGCTCAAGGTAAGAGACGTTATGACCGTAAACAATCTGGTTTCGGT…	397		397	GGTGGTCAAACTAAG	VALID	CCA	Proline
yHAB150_kazachstania_exigua_160519_g003445.m1	4236	ATGGTTAACGTTCCAAAGACAAGAAAGACCTACTGTAAGGGTAAGAACTGTAGAAAGCACACCCAACACAAGGTTACTCAATACAAGGCTGGTAAGGCTTCCTTATTCGCTCAAGGTAAGAGACGTTATGACCGTAAACAATCTGGTTTCGGTGGTCAAACTAAGCCAGTTTTCCACAAGAAAGCCAAGACTACCAAGAAGGTTGTTCTAAGATTAGAATGTGTTGCTTGTAAGACTAAGGCTCAATTAGTCCTAAAGAGATGTAAGCACTTCGAATTAGGTGGTGAAAGAAAGCAAAAGGGTGCTGCTCTACAATTCTGA	ATGGTTAACGTTCCAAAGACAAGAAAGACCTACTGTAAGGGTAAGAACTGTAGAAAGCACACCCAACACAAGGTTACTCAATACAAGGCTGGTAAGGCTTCCTTATTCGCTCAAGGTAAGAGACGTTATGACCGTAAACAATCTGGTTTCGGTGGTCAAACTAAGCCAGTTTTCCACAAGAAAGCCAAGACTACCAAGAAGGTTGTTCTAAGATTAGAATGTGTTGCTTGTAAGACTAAGGCTCAATTAGTCCTAAAGAGATGTAAGCACTTCGAATTAGGTGGTGAAAGAAAGCAAAAGGGTGCTGCTCTACAATTCTGA	151		151	GGTGGTCAAACTAAG	VALID	CCA	Proline
yHAB162_Kazachstania_barnettii_SPADES_g002217.m1	4236	ATGGTTAACGTTCCAAAGACTAGAAAGACCTACTGTAAGGGTAAGAACTGTCGTAAGCACACCCAACACAAGGTTACTCAATACAAGGCCGGTAAGGCTTCCTTGTTCGCTCAAGGTAAGAGACGTTATGACCGTAAACAATCTGGTTTCGGTGGTCAAACCAAGCCTGTTTTCCACAAGAAGGCTAAGACTACCAAGAAGGTTGTTCTAAGATTGGAATGTGTCGCTTGTAAGACTAAGGCCCAATTAGTCCTAAAGAGATGTAAGCACTTCGAACTTGGTGGTGAAAGAAAGCAAAAGGGTGCTGCTCTACAATTTTAA	ATGGTTAACGTTCCAAAGACTAGAAAGACCTACTGTAAGGGTAAGAACTGTCGTAAGCACACCCAACACAAGGTTACTCAATACAAGGCCGGTAAGGCTTCCTTGTTCGCTCAAGGTAAGAGACGTTATGACCGTAAACAATCTGGTTTCGGTGGTCAAACCAAGCCTGTTTTCCACAAGAAGGCTAAGACTACCAAGAAGGTTGTTCTAAGATTGGAATGTGTCGCTTGTAAGACTAAGGCCCAATTAGTCCTAAAGAGATGTAAGCACTTCGAACTTGGTGGTGAAAGAAAGCAAAAGGGTGCTGCTCTACAATTTTAA	151		151	GGTGGTCAAACCAAG	VALID	CCT	Proline
yHDO576_kazachstania_sp_180604_g002756.m1	4236	ATGGTTAACGTTCCAAAGACTAGAAAGACCTACTGTAAGGGTAAGAACTGCCGTAAGCACACCCAACACAAGGTTACCCAATACAAGGCCGGTAAGGCTTCCTTGTTCGCTCAAGGTAAGAGACGTTATGACCGTAAACAATCTGGTTTCGGTGGTCAAACTAAGCCTGTTTTCCACAAGAAAGCTAAGACTACCAAGAAGGTTGTTCTAAGATTGGAATGTGTTGCTTGTAAGACTAAGGCTCAATTAGTCCTAAAGAGATGTAAGCACTTCGAACTTGGTGGTGAAAGAAAGCAAAAGGGTGCTGCTCTACAATTTTAA	ATGGTTAACGTTCCAAAGACTAGAAAGACCTACTGTAAGGGTAAGAACTGCCGTAAGCACACCCAACACAAGGTTACCCAATACAAGGCCGGTAAGGCTTCCTTGTTCGCTCAAGGTAAGAGACGTTATGACCGTAAACAATCTGGTTTCGGTGGTCAAACTAAGCCTGTTTTCCACAAGAAAGCTAAGACTACCAAGAAGGTTGTTCTAAGATTGGAATGTGTTGCTTGTAAGACTAAGGCTCAATTAGTCCTAAAGAGATGTAAGCACTTCGAACTTGGTGGTGAAAGAAAGCAAAAGGGTGCTGCTCTACAATTTTAA	151		151	GGTGGTCAAACTAAG	VALID	CCT	Proline
yHAB152_candida_humilis_160519.haplomerger2_g004438.m1	4236	ATGGTTAACGTTCCAAAGACCAGAAAGACCTACTGTAAGGGTAAGAACTGCCGCAAGCACACCCAGCACAAGGTTACCCAGTACAAGGCTGGTAAGGCTTCTCTATTCGCCCAGGGTAAGAGACGTTATGACCGTAAGCAGTCTGGTTTCGGTGGTCAGACCAAGCCTGTCTTCCACAAGAAGGCTAAGACTACCAAGAAGGTTGTCCTAAGACTAGAGTGTGTTGCTTGCAAGACCAAGGCTCAGCTAGTCCTAAAGAGATGTAAGCACTTCGAGCTTGGTGGTGAGAAGAAGCAGAAGGGTGCCGCCCTACAGTTCTGA	ATGGTTAACGTTCCAAAGACCAGAAAGACCTACTGTAAGGGTAAGAACTGCCGCAAGCACACCCAGCACAAGGTTACCCAGTACAAGGCTGGTAAGGCTTCTCTATTCGCCCAGGGTAAGAGACGTTATGACCGTAAGCAGTCTGGTTTCGGTGGTCAGACCAAGCCTGTCTTCCACAAGAAGGCTAAGACTACCAAGAAGGTTGTCCTAAGACTAGAGTGTGTTGCTTGCAAGACCAAGGCTCAGCTAGTCCTAAAGAGATGTAAGCACTTCGAGCTTGGTGGTGAGAAGAAGCAGAAGGGTGCCGCCCTACAGTTCTGA	#VALUE!	151	#VALUE!	#VALUE!	#VALUE!	#VALUE!	#VALUE!
yHMPu5000034721_candida_milleri_190924.haplomerger2_g002952.m1	4236	ATGGTTAACGTTCCAAAGACCAGAAAGACCTACTGTAAGGGTAAGAACTGCCGCAAGCACACCCAGCACAAGGTTACCCAGTACAAGGCTGGTAAGGCTTCTCTATTCGCCCAGGGTAAGAGACGTTATGACCGTAAGCAGTCTGGTTTCGGTGGTCAGACCAAGCCTGTCTTCCACAAGAAGGCTAAGACTACCAAGAAGGTTGTCCTAAGACTAGAGTGTGTTGCTTGCAAGACCAAGGCTCAGCTAGTCCTAAAGAGATGTAAGCACTTCGAGCTTGGTGGTGAGAAGAAGCAGAAGGGTGCCGCCCTACAGTTCTGA	ATGGTTAACGTTCCAAAGACCAGAAAGACCTACTGTAAGGGTAAGAACTGCCGCAAGCACACCCAGCACAAGGTTACCCAGTACAAGGCTGGTAAGGCTTCTCTATTCGCCCAGGGTAAGAGACGTTATGACCGTAAGCAGTCTGGTTTCGGTGGTCAGACCAAGCCTGTCTTCCACAAGAAGGCTAAGACTACCAAGAAGGTTGTCCTAAGACTAGAGTGTGTTGCTTGCAAGACCAAGGCTCAGCTAGTCCTAAAGAGATGTAAGCACTTCGAGCTTGGTGGTGAGAAGAAGCAGAAGGGTGCCGCCCTACAGTTCTGA	#VALUE!	151	#VALUE!	#VALUE!	#VALUE!	#VALUE!	#VALUE!
yHMPu5000037210_Kazachstania_jinghongensis_SPADES_g000519.m1	4236	ATGGTTAACGTTCCAAAGACTAGAAAGACTTACTGTAAGGGTAAGAACTGTAGAAAGCACACCCAACACAAGGTTACTCAATACAAGGCTGGTAAGGCTTCCTTATTCGCTCAAGGTAAGAGACGTTATGACCGTAAGCAATCCGGTTTCGGTGGTCAAACCAAGCCAGTTTTCCACAAGAAGGCTAAGACCACTAAGAAGGTCGTCTTAAGATTGGAATGTGTCGCTTGTAAGACTAAGGCTCAATTAGTCCTAAAGAGATGTAAGCATTTTGAATTAGGTGGTGAAAAGAAGCAAAAGGGTGCTGCTTTACAATTTTAA	ATGGTTAACGTTCCAAAGACTAGAAAGACTTACTGTAAGGGTAAGAACTGTAGAAAGCACACCCAACACAAGGTTACTCAATACAAGGCTGGTAAGGCTTCCTTATTCGCTCAAGGTAAGAGACGTTATGACCGTAAGCAATCCGGTTTCGGTGGTCAAACCAAGCCAGTTTTCCACAAGAAGGCTAAGACCACTAAGAAGGTCGTCTTAAGATTGGAATGTGTCGCTTGTAAGACTAAGGCTCAATTAGTCCTAAAGAGATGTAAGCATTTTGAATTAGGTGGTGAAAAGAAGCAAAAGGGTGCTGCTTTACAATTTTAA	151		151	GGTGGTCAAACCAAG	VALID	CCA	Proline
yHMPu5000040961_kazachstania_turicensis_201018_g001775.m1	4236	ATGGTTAACGTTCCAAAGACTAGAAAGACCTACTGCAAGGGTAAGAACTGTAGAAAGCACACTCAACACAAGGTTACTCAATACAAGGCTGGTAAGGCCTCCTTATTCGCTCAAGGTAAGAGACGTTATGACCGTAAACAATCTGGTTTCGGTGGTCAAACTAAGCCAGTTTTCCACAAGAAAGCTAAGACTACCAAGAAGGTTGTTCTAAGATTAGAATGTGTCGCTTGTAAGACTAAGGCTCAATTAGTTCTAAAGAGATGTAAGCACTTCGAATTAGGTGGTGAAAAGAAGCAAAAGGGTGCTGCTCTACAATTCTGA	ATGGTTAACGTTCCAAAGACTAGAAAGACCTACTGCAAGGGTAAGAACTGTAGAAAGCACACTCAACACAAGGTTACTCAATACAAGGCTGGTAAGGCCTCCTTATTCGCTCAAGGTAAGAGACGTTATGACCGTAAACAATCTGGTTTCGGTGGTCAAACTAAGCCAGTTTTCCACAAGAAAGCTAAGACTACCAAGAAGGTTGTTCTAAGATTAGAATGTGTCGCTTGTAAGACTAAGGCTCAATTAGTTCTAAAGAGATGTAAGCACTTCGAATTAGGTGGTGAAAAGAAGCAAAAGGGTGCTGCTCTACAATTCTGA	151		151	GGTGGTCAAACTAAG	VALID	CCA	Proline
yHAB138_kazachstania_lodderae_160519_g001377.m1	4236	ATGTCATTGAGACTAAAACTGGATGTTATAATTACAACTTTTGTTCATATTTCAAACAATAAGCATATTAAAAACATAAATAATAAGGTACAGCAGATTCGAACAGTAATGATTAACGTTCCAAAGACTAGAAAGACCTACTGTAAGGGTAAGAACTGTCGTAAGCACACTCAACACAAGGTTACCCAATACAAAGCTGGTAAGGCTTCCTTATTTGCTCAAGGTAAGAGACGTTATGACCGTAAACAATCCGGTTTCGGTGGTCAAACTAAGCCAGTTTTCCACAAGAAAGCTAAGACTACCAAGAAGGTTGTTCTAAGATTAGAATGTGTTGCTTGTAAGACTAAGGCTCAATTAGTCTTAAAGAGATGTAAGCACTTCGAATTAGGTGGTGAAAAG…	ATGTCATTGAGACTAAAACTGGATGTTATAATTACAACTTTTGTTCATATTTCAAACAATAAGCATATTAAAAACATAAATAATAAGGTACAGCAGATTCGAACAGTAATGATTAACGTTCCAAAGACTAGAAAGACCTACTGTAAGGGTAAGAACTGTCGTAAGCACACTCAACACAAGGTTACCCAATACAAAGCTGGTAAGGCTTCCTTATTTGCTCAAGGTAAGAGACGTTATGACCGTAAACAATCCGGTTTCGGTGGTCAAACTAAGCCAGTTTTCCACAAGAAAGCTAAGACTACCAAGAAGGTTGTTCTAAGATTAGAATGTGTTGCTTGTAAGACTAAGGCTCAATTAGTCTTAAAGAGATGTAAGCACTTCGAATTAGGTGGTGAAAAG…	259		259	GGTGGTCAAACTAAG	VALID	CCA	Proline
yHMPu5000034871_naumovozyma_castellii_180604_g003412.m1	4236	ATGGTTAACGTTCCAAAGACCAGAAAGACTTACTGTAAGGGTAGAAACTGTCGTAAGCACACCCAACACAAGGTTACCCAATACAAAGCTGGTAAGGCTTCCTTGTTCGCTCAAGGTAAGAGACGTTATGACCGTAAACAATCCGGTTTCGGTGGTCAAACCAAGCCAGTTTTCCACAAGAAAGCTAAGACTACCAAGAAGGTTGTTTTGAGATTGGAATGTGTCGCTTGTAAGACTAAGGCTCAATTAGTCTTGAAGAGATGTAAGCATTTCGAATTAGGTGGTGAAAAGAAGCAAAAGGGTGCTGCTTTGCAATTTTAA	ATGGTTAACGTTCCAAAGACCAGAAAGACTTACTGTAAGGGTAGAAACTGTCGTAAGCACACCCAACACAAGGTTACCCAATACAAAGCTGGTAAGGCTTCCTTGTTCGCTCAAGGTAAGAGACGTTATGACCGTAAACAATCCGGTTTCGGTGGTCAAACCAAGCCAGTTTTCCACAAGAAAGCTAAGACTACCAAGAAGGTTGTTTTGAGATTGGAATGTGTCGCTTGTAAGACTAAGGCTCAATTAGTCTTGAAGAGATGTAAGCATTTCGAATTAGGTGGTGAAAAGAAGCAAAAGGGTGCTGCTTTGCAATTTTAA	151		151	GGTGGTCAAACCAAG	VALID	CCA	Proline
yHMPu5000034894_naumovozyma_baii_190924_g004266.m1	4236	ATGGTTAACGTTCCTAAGACCAGAAAGACCTTCTGTAAGGGTAAGAACTGCCGTAAGCACACTCAACATAAGGTTACTCAATACAAAGCCGGTAAGGCCTCCTTATTTGCTCAAGGTAAGAGACGTTATGACCGTAAACAATCCGGTTTTGGTGGTCAAACCAAGCCAGTTTTCCACAAGAAAGCTAAGACTACCAAGAAGGTTGTTTTGAGATTGGAATGTGTTGCTTGTAAGACTAAGGCTCAATTGGTCTTGAAGAGATGTAAGCATTTCGAATTGGGTGGTGAAAAGAAGCAAAAGGGTGCTGCTTTACAATTTTAA	ATGGTTAACGTTCCTAAGACCAGAAAGACCTTCTGTAAGGGTAAGAACTGCCGTAAGCACACTCAACATAAGGTTACTCAATACAAAGCCGGTAAGGCCTCCTTATTTGCTCAAGGTAAGAGACGTTATGACCGTAAACAATCCGGTTTTGGTGGTCAAACCAAGCCAGTTTTCCACAAGAAAGCTAAGACTACCAAGAAGGTTGTTTTGAGATTGGAATGTGTTGCTTGTAAGACTAAGGCTCAATTGGTCTTGAAGAGATGTAAGCATTTCGAATTGGGTGGTGAAAAGAAGCAAAAGGGTGCTGCTTTACAATTTTAA	151		151	GGTGGTCAAACCAAG	VALID	CCA	Proline
yHMPu5000034894_naumovozyma_baii_190924_g003939.m1	4236	ATGGTTAACGTTCCAAAGACTAGAAAGACCTTCTGTAAGGGTAAGAACTGTCGTAAGCACACTCAACACAAGGTTACTCAATACAAAGCTGGTAAGGCCTCCTTGTTTGCTCAAGGTAAGAGACGTTATGACCGTAAACAATCCGGTTTCGGTGGTCAAACTAAACCAGTTTTCCACAAGAAAGCTAAGACTACTAAGAAGGTTGTCTTAAGATTGGAATGTGTTGCTTGTAAGACTAAGGCTCAATTAGTCTTGAAGAGATGTAAGCATTTTGAATTGGGTGGTGAAAAGAAACAAAAGGGTGCTGCTTTGCAATTCTGA	ATGGTTAACGTTCCAAAGACTAGAAAGACCTTCTGTAAGGGTAAGAACTGTCGTAAGCACACTCAACACAAGGTTACTCAATACAAAGCTGGTAAGGCCTCCTTGTTTGCTCAAGGTAAGAGACGTTATGACCGTAAACAATCCGGTTTCGGTGGTCAAACTAAACCAGTTTTCCACAAGAAAGCTAAGACTACTAAGAAGGTTGTCTTAAGATTGGAATGTGTTGCTTGTAAGACTAAGGCTCAATTAGTCTTGAAGAGATGTAAGCATTTTGAATTGGGTGGTGAAAAGAAACAAAAGGGTGCTGCTTTGCAATTCTGA	151		151	GGTGGTCAAACTAAA	VALID	CCA	Proline
yHAB136_kazachstania_bromeliacearum_160519_g005066.m1	4236	ATGGTTAACGTTCCAAAGACTAGAAAGACTTACTGTAAGGGTAGAAACTGTCGTAAGCACACCCAACACAAGGTTACCCAATACAAGGCTGGTAAGGCTTCTTTGTTCGCTCAAGGTAAGAGACGTTATGACCGTAAACAATCCGGTTTCGGTGGTCAAACTAAGCCAGTTTTCCACAAGAAAGCTAAGACTACCAAGAAGGTTGTTTTAAGATTGGAATGTGTTGCTTGTAAGACCAAGGCTCAATTGACCTTGAAGAGATGTAAGCATTTTGAATTAGGTGGTGAAAAGAAGCAAAAGGGTGCTGCTTTACAATTTTAA	ATGGTTAACGTTCCAAAGACTAGAAAGACTTACTGTAAGGGTAGAAACTGTCGTAAGCACACCCAACACAAGGTTACCCAATACAAGGCTGGTAAGGCTTCTTTGTTCGCTCAAGGTAAGAGACGTTATGACCGTAAACAATCCGGTTTCGGTGGTCAAACTAAGCCAGTTTTCCACAAGAAAGCTAAGACTACCAAGAAGGTTGTTTTAAGATTGGAATGTGTTGCTTGTAAGACCAAGGCTCAATTGACCTTGAAGAGATGTAAGCATTTTGAATTAGGTGGTGAAAAGAAGCAAAAGGGTGCTGCTTTACAATTTTAA	151		151	GGTGGTCAAACTAAG	VALID	CCA	Proline
yHAB144_kazachstania_jainica_160519.haplomerger2_g004377.m1	4236	ATGGTTAACGTTCCAAAAACTAGAAAAACTTACTGTAAGGGTAAAAACTGTCGTAAGCACACTCAACACAAGGTTACTCAATACAAGGCTGGTAAGGCTTCCTTATTTGCTCAAGGTAAGAGACGTTATGATCGTAAACAATCCGGTTTCGGTGGTCAAACTAAGCCAGTTTTCCACAAGAAAGCTAAGACCACCAAGAAGGTTGTCTTAAGATTAGAATGTGTTGCTTGTAAGACTAAGGCTCAATTAACTTTAAAGAGATGTAAGCATTTCGAATTAGGTGGTGAAAAGAAGCAAAAGGGTGCTGCTTTACAATTTTAA	ATGGTTAACGTTCCAAAAACTAGAAAAACTTACTGTAAGGGTAAAAACTGTCGTAAGCACACTCAACACAAGGTTACTCAATACAAGGCTGGTAAGGCTTCCTTATTTGCTCAAGGTAAGAGACGTTATGATCGTAAACAATCCGGTTTCGGTGGTCAAACTAAGCCAGTTTTCCACAAGAAAGCTAAGACCACCAAGAAGGTTGTCTTAAGATTAGAATGTGTTGCTTGTAAGACTAAGGCTCAATTAACTTTAAAGAGATGTAAGCATTTCGAATTAGGTGGTGAAAAGAAGCAAAAGGGTGCTGCTTTACAATTTTAA	151		151	GGTGGTCAAACTAAG	VALID	CCA	Proline
yHMPu5000034874_tetrapisispora_blattae_190924_g005554.m1	4236	ATGGTTAACGTTCCAAAGACCAGAAAGACTTACTGTAAGGGTAAAAACTGTCGTAAACACACCCAACATAAGGTTACTCAATACAAGGCTGGTAAGGCTTCCTTGTTCGCCCAAGGTAAGAGACGTTATGACCGTAAACAATCTGGTTTCGGTGGTCAAACTAAGCCTGTTTTCCACAAGAAAGCTAAGACTACCAAGAAGGTCGTTTTAAGATTAGAATGTGTTGCTTGTAAGACCAAGGCCCAATTAACCTTGAAGAGATGTAAGCATTTCGAATTAGGTGGTGAAAAGAAGCAAAAGGGTGCTGCTTTACAATTTTAA	ATGGTTAACGTTCCAAAGACCAGAAAGACTTACTGTAAGGGTAAAAACTGTCGTAAACACACCCAACATAAGGTTACTCAATACAAGGCTGGTAAGGCTTCCTTGTTCGCCCAAGGTAAGAGACGTTATGACCGTAAACAATCTGGTTTCGGTGGTCAAACTAAGCCTGTTTTCCACAAGAAAGCTAAGACTACCAAGAAGGTCGTTTTAAGATTAGAATGTGTTGCTTGTAAGACCAAGGCCCAATTAACCTTGAAGAGATGTAAGCATTTCGAATTAGGTGGTGAAAAGAAGCAAAAGGGTGCTGCTTTACAATTTTAA	151		151	GGTGGTCAAACTAAG	VALID	CCT	Proline
yHAB160_kazachstania_kunashirensis_160519_g001473.m1	4236	ATGGTTAACGTTCCAAAGACTAGAAAGACCTACTGTAAGGGTAAGACCTGTCGTAAACACACTCAACATAAGGTTACTCAATACAAAGCTGGTAAGGCTTCCTTATTCGCTCAAGGTAAGAGACGTTATGACCGTAAACAATCCGGTTTCGGTGGTCAAACCAAGCCAGTTTTCCACAAGAAAGCTAAGACTACCAAGAAGGTTGTTTTAAGATTAGAATGTGTTGCTTGTAAGACTAAGGCTCAATTAGTCTTAAAGAGATGTAAGCACTTCGAATTAGGTGGTGAAAAGAAGCAAAAGGGTGCTGCTTTACAATTTTAA	ATGGTTAACGTTCCAAAGACTAGAAAGACCTACTGTAAGGGTAAGACCTGTCGTAAACACACTCAACATAAGGTTACTCAATACAAAGCTGGTAAGGCTTCCTTATTCGCTCAAGGTAAGAGACGTTATGACCGTAAACAATCCGGTTTCGGTGGTCAAACCAAGCCAGTTTTCCACAAGAAAGCTAAGACTACCAAGAAGGTTGTTTTAAGATTAGAATGTGTTGCTTGTAAGACTAAGGCTCAATTAGTCTTAAAGAGATGTAAGCACTTCGAATTAGGTGGTGAAAAGAAGCAAAAGGGTGCTGCTTTACAATTTTAA	151		151	GGTGGTCAAACCAAG	VALID	CCA	Proline
yHMPu5000034706_Kazachstania_psychrophila_SPADES_g001980.m1	4236	ATGGTTAACGTTCCAAAGACCAGAAAGACCTACTGTAAGGGTAAGACCTGTCGTAAGCACACTCAACACAAAGTTACCCAATACAAGGCTGGTAAGGCTTCCTTATTTGCTCAAGGTAAGAGACGTTATGACCGTAAACAATCCGGTTTCGGTGGTCAAACTAAGCCAGTTTTCCACAAGAAAGCTAAGACTACCAAGAAGGTTGTTTTAAGATTAGAATGTGTTGCTTGTAAGACCAAGGCTCAATTAGTCTTAAAGAGATGTAAGCACTTCGAATTAGGTGGTGAAAAGAAGCAAAAGGGTGCTGCTTTACAATTTTAG	ATGGTTAACGTTCCAAAGACCAGAAAGACCTACTGTAAGGGTAAGACCTGTCGTAAGCACACTCAACACAAAGTTACCCAATACAAGGCTGGTAAGGCTTCCTTATTTGCTCAAGGTAAGAGACGTTATGACCGTAAACAATCCGGTTTCGGTGGTCAAACTAAGCCAGTTTTCCACAAGAAAGCTAAGACTACCAAGAAGGTTGTTTTAAGATTAGAATGTGTTGCTTGTAAGACCAAGGCTCAATTAGTCTTAAAGAGATGTAAGCACTTCGAATTAGGTGGTGAAAAGAAGCAAAAGGGTGCTGCTTTACAATTTTAG	151		151	GGTGGTCAAACTAAG	VALID	CCA	Proline
[truncated: 744 more rows]

## Sheet: uL42_final
ID	Length_nt	NA_sequence	CLEAN	CAA version / Looking for sequence with CAA version	CAG version / Looking for sequence with CAA version	The ? wildcards, however, can match any character. You now want to ensure those wildcard positions are strictly A/C/G/T.	The ? wildcards, however, can match any character. You now want to ensure those wildcard positions are strictly A/C/G/T.2	identifies the first valid start position of the motif (GGN GGN CAA/CAG + 6 bases) within each sequence.	Find 3 bases that follow the 15 base length sequence	Add the amino acid name	Length Check		Proline	777
[truncated: 1,258 more rows]
